# Supplementary material for: Chronic hypoxia disrupts T regulatory cell phenotype contributing to the emergence of exTreg-TH17 cells
Source: Front Physiol. 2024 Jan 29;14:1304732. doi: 10.3389/fphys.2023.1304732 (PMC10859758; doi:10.3389/fphys.2023.1304732)
Supplement: Supplementary file 1 [file Table2.XLSX]

## Sheet: CD4_memoryT_subclusters DEG
cluster_id	gene	p_val	avg_log2FC	pct.1	pct.2	p_val_adj	description
0	Hbb-bs	2.89138e-79	1.39483	0.703	0.057	4.67189e-75	hemoglobin, beta adult s chain [Source:MGI Symbol;Acc:MGI:5474852]
0	Ubb	2.44837e-74	1.15897	0.938	0.817	3.95608e-70	ubiquitin B [Source:MGI Symbol;Acc:MGI:98888]
0	Uba52	1.57557e-52	1.04265	0.928	0.845	2.54581e-48	ubiquitin A-52 residue ribosomal protein fusion product 1 [Source:MGI Symbol;Acc:MGI:98887]
0	mt-Co1	7.1166e-51	-0.285048	1	1	1.1499e-46	mitochondrially encoded cytochrome c oxidase I [Source:MGI Symbol;Acc:MGI:102504]
0	Rps18	2.46396e-48	0.783101	0.993	0.992	3.98127e-44	ribosomal protein S18 [Source:MGI Symbol;Acc:MGI:98146]
0	Rps3	1.30926e-44	0.686434	0.993	0.985	2.1155e-40	ribosomal protein S3 [Source:MGI Symbol;Acc:MGI:1350917]
0	Rpl21	8.66462e-41	0.68532	1	0.994	1.40003e-36	ribosomal protein L21 [Source:MGI Symbol;Acc:MGI:1278340]
0	Ppia	2.69468e-40	0.745856	0.983	0.935	4.35406e-36	peptidylprolyl isomerase A [Source:MGI Symbol;Acc:MGI:97749]
0	Rpl10	1.89841e-39	0.812257	0.975	0.948	3.06746e-35	ribosomal protein L10 [Source:MGI Symbol;Acc:MGI:105943]
0	Rpl32	2.74125e-39	0.735596	0.993	0.988	4.42931e-35	ribosomal protein L32 [Source:MGI Symbol;Acc:MGI:98038]
0	Rpl15	7.47702e-39	0.795356	0.973	0.929	1.20814e-34	ribosomal protein L15 [Source:MGI Symbol;Acc:MGI:1913730]
0	Rps11	1.32297e-37	0.750816	0.995	0.986	2.13765e-33	ribosomal protein S11 [Source:MGI Symbol;Acc:MGI:1351329]
0	Rps15a	5.6129e-37	0.734852	1	0.994	9.06933e-33	ribosomal protein S15A [Source:MGI Symbol;Acc:MGI:2389091]
0	Rpl11	6.05542e-37	0.686914	1	0.98	9.78435e-33	ribosomal protein L11 [Source:MGI Symbol;Acc:MGI:1914275]
0	Rpl34	8.46669e-36	0.661329	0.998	0.992	1.36805e-31	ribosomal protein L34 [Source:MGI Symbol;Acc:MGI:1915686]
0	Rps7	1.59911e-33	0.689851	0.993	0.988	2.58385e-29	ribosomal protein S7 [Source:MGI Symbol;Acc:MGI:1333818]
0	Hba-a2	3.96765e-33	1.0123	0.55	0.055	6.41094e-29	hemoglobin alpha, adult chain 2 [Source:MGI Symbol;Acc:MGI:96016]
0	Tmsb10	3.6374e-31	0.726151	0.995	0.986	5.87731e-27	thymosin, beta 10 [Source:MGI Symbol;Acc:MGI:109146]
0	Rpl9	2.16451e-29	0.627869	0.988	0.989	3.49742e-25	ribosomal protein L9 [Source:MGI Symbol;Acc:MGI:1298373]
0	Rpl8	5.9387e-29	0.624692	0.99	0.992	9.59575e-25	ribosomal protein L8 [Source:MGI Symbol;Acc:MGI:1350927]
0	Hsp90aa1	1.34742e-28	-0.474854	0.621	0.808	2.17715e-24	heat shock protein 90, alpha (cytosolic), class A member 1 [Source:MGI Symbol;Acc:MGI:96250]
0	Rps2	3.07556e-28	0.739254	0.98	0.965	4.9695e-24	ribosomal protein S2 [Source:MGI Symbol;Acc:MGI:105110]
0	Ighm	1.98181e-27	-0.453054	0.837	0.94	3.2022e-23	immunoglobulin heavy constant mu [Source:MGI Symbol;Acc:MGI:96448]
0	Rpl28	4.92184e-27	0.673508	0.988	0.969	7.9527e-23	ribosomal protein L28 [Source:MGI Symbol;Acc:MGI:101839]
0	Cd52	9.85851e-27	0.822029	0.98	0.942	1.59294e-22	CD52 antigen [Source:MGI Symbol;Acc:MGI:1346088]
0	mt-Co2	1.33302e-26	-0.174007	1	1	2.15389e-22	mitochondrially encoded cytochrome c oxidase II [Source:MGI Symbol;Acc:MGI:102503]
0	Nme2	1.80363e-26	0.717646	0.77	0.533	2.91431e-22	NME/NM23 nucleoside diphosphate kinase 2 [Source:MGI Symbol;Acc:MGI:97356]
0	Hspa8	1.90725e-25	-0.310203	0.899	0.965	3.08174e-21	heat shock protein 8 [Source:MGI Symbol;Acc:MGI:105384]
0	Rpl36	3.13066e-25	0.623272	0.998	0.991	5.05853e-21	ribosomal protein L36 [Source:MGI Symbol;Acc:MGI:1860603]
0	Rps5	5.75487e-25	0.600243	0.993	0.982	9.29871e-21	ribosomal protein S5 [Source:MGI Symbol;Acc:MGI:1097682]
0	Fau	6.9166e-25	0.542123	1	1	1.11758e-20	Finkel-Biskis-Reilly murine sarcoma virus (FBR-MuSV) ubiquitously expressed (fox derived) [Source:MGI Symbol;Acc:MGI:102547]
0	Rplp0	1.27619e-24	0.754144	0.973	0.96	2.06207e-20	ribosomal protein, large, P0 [Source:MGI Symbol;Acc:MGI:1927636]
0	Rbm3	2.53904e-24	0.667785	0.854	0.673	4.10258e-20	RNA binding motif (RNP1, RRM) protein 3 [Source:MGI Symbol;Acc:MGI:1099460]
0	Ftl1	2.68252e-24	0.690083	0.851	0.704	4.33441e-20	ferritin light polypeptide 1 [Source:MGI Symbol;Acc:MGI:95589]
0	Rpl26	3.3752e-24	0.593717	0.993	0.986	5.45365e-20	ribosomal protein L26 [Source:MGI Symbol;Acc:MGI:106022]
0	H3f3b	1.3924e-23	0.660665	0.923	0.894	2.24984e-19	H3.3 histone B [Source:MGI Symbol;Acc:MGI:1101768]
0	S100a9	5.70662e-22	-0.494795	0.606	0.823	9.22076e-18	S100 calcium binding protein A9 (calgranulin B) [Source:MGI Symbol;Acc:MGI:1338947]
0	Rpl14	1.29085e-21	0.578246	0.988	0.955	2.08575e-17	ribosomal protein L14 [Source:MGI Symbol;Acc:MGI:1914365]
0	Rpl24	1.60556e-21	0.630546	0.993	0.971	2.59426e-17	ribosomal protein L24 [Source:MGI Symbol;Acc:MGI:1915443]
0	Elob	2.21752e-21	0.596273	0.795	0.528	3.58306e-17	elongin B [Source:MGI Symbol;Acc:MGI:1914923]
0	mt-Nd4	3.70931e-21	-0.164289	0.998	1	5.99351e-17	mitochondrially encoded NADH dehydrogenase 4 [Source:MGI Symbol;Acc:MGI:102498]
0	Ppib	3.98981e-21	0.58772	0.713	0.449	6.44673e-17	peptidylprolyl isomerase B [Source:MGI Symbol;Acc:MGI:97750]
0	Sh3bgrl3	1.38528e-20	0.617946	0.943	0.837	2.23833e-16	SH3 domain binding glutamic acid-rich protein-like 3 [Source:MGI Symbol;Acc:MGI:1920973]
0	Gapdh	1.62939e-20	0.696741	0.864	0.734	2.63278e-16	glyceraldehyde-3-phosphate dehydrogenase [Source:MGI Symbol;Acc:MGI:95640]
0	S100a11	3.58612e-20	0.701934	0.839	0.648	5.79445e-16	S100 calcium binding protein A11 [Source:MGI Symbol;Acc:MGI:1338798]
0	Rps4x	4.37618e-20	0.57908	0.993	0.983	7.07103e-16	ribosomal protein S4, X-linked [Source:MGI Symbol;Acc:MGI:98158]
0	Hba-a1	6.2988e-20	0.858466	0.478	0.028	1.01776e-15	hemoglobin alpha, adult chain 1 [Source:MGI Symbol;Acc:MGI:96015]
0	Rpl35	1.32606e-19	0.647785	0.968	0.942	2.14265e-15	ribosomal protein L35 [Source:MGI Symbol;Acc:MGI:1913739]
0	S100a10	2.12508e-18	0.649386	0.931	0.81	3.4337e-14	S100 calcium binding protein A10 (calpactin) [Source:MGI Symbol;Acc:MGI:1339468]
0	Tpt1	2.74874e-18	0.512788	1	1	4.44142e-14	tumor protein, translationally-controlled 1 [Source:MGI Symbol;Acc:MGI:104890]
0	Emp3	2.7929e-18	0.609741	0.807	0.624	4.51277e-14	epithelial membrane protein 3 [Source:MGI Symbol;Acc:MGI:1098729]
0	AY036118	3.42695e-18	0.668479	0.755	0.518	5.53726e-14	NA
0	Clic1	3.61559e-18	0.551388	0.842	0.671	5.84207e-14	chloride intracellular channel 1 [Source:MGI Symbol;Acc:MGI:2148924]
0	Ngp	7.67384e-18	-0.404247	0.171	0.415	1.23994e-13	neutrophilic granule protein [Source:MGI Symbol;Acc:MGI:105983]
0	Rps27a	9.74638e-18	0.515794	1	0.992	1.57482e-13	ribosomal protein S27A [Source:MGI Symbol;Acc:MGI:1925544]
0	S100a8	1.26065e-17	-0.445649	0.599	0.823	2.03696e-13	S100 calcium binding protein A8 (calgranulin A) [Source:MGI Symbol;Acc:MGI:88244]
0	Gm8369	7.17237e-17	0.58032	0.621	0.395	1.15891e-12	predicted gene 8369 [Source:MGI Symbol;Acc:MGI:3645380]
0	BC005537	7.83555e-17	-0.31575	0.52	0.657	1.26607e-12	cDNA sequence BC005537 [Source:MGI Symbol;Acc:MGI:2441726]
0	H3f3a	8.13431e-17	0.552084	0.933	0.78	1.31434e-12	H3.3 histone A [Source:MGI Symbol;Acc:MGI:1097686]
0	Rpl13	9.17124e-17	0.536592	0.995	0.992	1.48189e-12	ribosomal protein L13 [Source:MGI Symbol;Acc:MGI:105922]
0	Ogt	1.13951e-16	-0.257452	0.809	0.892	1.84122e-12	O-linked N-acetylglucosamine (GlcNAc) transferase (UDP-N-acetylglucosamine:polypeptide-N-acetylglucosaminyl transferase) [Source:MGI Symbol;Acc:MGI:1339639]
0	Cd3g	1.31323e-16	0.5654	0.97	0.911	2.12192e-12	CD3 antigen, gamma polypeptide [Source:MGI Symbol;Acc:MGI:88333]
0	Camp	1.66345e-16	-0.364809	0.295	0.492	2.68781e-12	cathelicidin antimicrobial peptide [Source:MGI Symbol;Acc:MGI:108443]
0	Rpl17	2.58884e-16	0.491889	1	0.995	4.18305e-12	ribosomal protein L17 [Source:MGI Symbol;Acc:MGI:2448270]
0	Rpl6	2.75901e-16	0.553407	0.988	0.978	4.45801e-12	ribosomal protein L6 [Source:MGI Symbol;Acc:MGI:108057]
0	Rpl10a	3.421e-16	0.562148	0.988	0.954	5.52765e-12	ribosomal protein L10A [Source:MGI Symbol;Acc:MGI:1343877]
0	Rps10	1.2109e-15	0.504652	0.995	0.997	1.95657e-11	ribosomal protein S10 [Source:MGI Symbol;Acc:MGI:1914347]
0	Igkc	2.3122e-15	-0.273735	0.928	0.965	3.73605e-11	immunoglobulin kappa constant [Source:MGI Symbol;Acc:MGI:96495]
0	Itm2b	2.93339e-15	0.530266	0.918	0.839	4.73977e-11	integral membrane protein 2B [Source:MGI Symbol;Acc:MGI:1309517]
0	H2-D1	3.11532e-15	0.51021	0.998	0.978	5.03373e-11	histocompatibility 2, D region locus 1 [Source:MGI Symbol;Acc:MGI:95896]
0	Cyba	3.31774e-15	0.539618	0.802	0.618	5.3608e-11	cytochrome b-245, alpha polypeptide [Source:MGI Symbol;Acc:MGI:1316658]
0	Rsrp1	3.62995e-15	-0.209869	0.861	0.909	5.86527e-11	arginine/serine rich protein 1 [Source:MGI Symbol;Acc:MGI:106498]
0	Rpl19	4.80929e-15	0.473972	0.998	0.997	7.77085e-11	ribosomal protein L19 [Source:MGI Symbol;Acc:MGI:98020]
0	Cox8a	1.25655e-14	0.562062	0.792	0.633	2.03033e-10	cytochrome c oxidase subunit 8A [Source:MGI Symbol;Acc:MGI:105959]
0	Hnrnph1	1.94529e-14	-0.280394	0.569	0.71	3.14319e-10	heterogeneous nuclear ribonucleoprotein H1 [Source:MGI Symbol;Acc:MGI:1891925]
0	Selenow	2.53746e-14	0.524336	0.777	0.596	4.10002e-10	selenoprotein W [Source:MGI Symbol;Acc:MGI:1100878]
0	Gm26917	3.17169e-14	-0.365873	0.515	0.602	5.12482e-10	NA
0	Eif4a2	4.23032e-14	-0.253643	0.626	0.739	6.83536e-10	eukaryotic translation initiation factor 4A2 [Source:MGI Symbol;Acc:MGI:106906]
0	mt-Atp6	4.77424e-14	-0.0601747	1	1	7.71421e-10	mitochondrially encoded ATP synthase 6 [Source:MGI Symbol;Acc:MGI:99927]
0	Rpl39	6.53294e-14	0.551992	0.995	0.994	1.05559e-09	ribosomal protein L39 [Source:MGI Symbol;Acc:MGI:1914498]
0	Dnaja1	6.79352e-14	-0.239929	0.708	0.794	1.0977e-09	DnaJ heat shock protein family (Hsp40) member A1 [Source:MGI Symbol;Acc:MGI:1270129]
0	Psmb8	1.18355e-13	0.516183	0.832	0.704	1.91237e-09	proteasome (prosome, macropain) subunit, beta type 8 (large multifunctional peptidase 7) [Source:MGI Symbol;Acc:MGI:1346527]
0	mt-Co3	2.75626e-13	-0.0500814	1	1	4.45357e-09	mitochondrially encoded cytochrome c oxidase III [Source:MGI Symbol;Acc:MGI:102502]
0	Rps27	8.92957e-13	0.437898	1	1	1.44284e-08	ribosomal protein S27 [Source:MGI Symbol;Acc:MGI:1888676]
0	Wnk1	1.35945e-12	-0.246919	0.641	0.74	2.1966e-08	WNK lysine deficient protein kinase 1 [Source:MGI Symbol;Acc:MGI:2442092]
0	Laptm5	1.67887e-12	-0.144036	0.965	0.971	2.71273e-08	lysosomal-associated protein transmembrane 5 [Source:MGI Symbol;Acc:MGI:108046]
0	Eno1	1.69358e-12	0.469853	0.641	0.475	2.73648e-08	enolase 1, alpha non-neuron [Source:MGI Symbol;Acc:MGI:95393]
0	Pfdn5	1.90774e-12	0.515188	0.866	0.794	3.08252e-08	prefoldin 5 [Source:MGI Symbol;Acc:MGI:1928753]
0	Ndufa13	2.32357e-12	0.463363	0.812	0.605	3.75442e-08	NADH:ubiquinone oxidoreductase subunit A13 [Source:MGI Symbol;Acc:MGI:1914434]
0	Tspo	6.46552e-12	0.456733	0.797	0.588	1.0447e-07	translocator protein [Source:MGI Symbol;Acc:MGI:88222]
0	Rpl3	9.78123e-12	0.491375	0.985	0.972	1.58045e-07	ribosomal protein L3 [Source:MGI Symbol;Acc:MGI:1351605]
0	Hsp90ab1	9.89604e-12	-0.0975949	0.948	0.972	1.599e-07	heat shock protein 90 alpha (cytosolic), class B member 1 [Source:MGI Symbol;Acc:MGI:96247]
0	Crip1	1.06866e-11	0.611268	0.807	0.68	1.72674e-07	cysteine-rich protein 1 (intestinal) [Source:MGI Symbol;Acc:MGI:88501]
0	Cox5b	2.07788e-11	0.445601	0.668	0.421	3.35743e-07	cytochrome c oxidase subunit 5B [Source:MGI Symbol;Acc:MGI:88475]
0	Rps13	2.48281e-11	0.444729	0.995	0.997	4.01173e-07	ribosomal protein S13 [Source:MGI Symbol;Acc:MGI:1915302]
0	Celf2	3.00903e-11	-0.19606	0.745	0.816	4.862e-07	CUGBP, Elav-like family member 2 [Source:MGI Symbol;Acc:MGI:1338822]
0	Trbc2	3.0251e-11	0.613546	0.933	0.926	4.88795e-07	T cell receptor beta, constant 2 [Source:MGI Symbol;Acc:MGI:4835227]
0	Setd1b	4.32005e-11	-0.273748	0.24	0.398	6.98033e-07	SET domain containing 1B [Source:MGI Symbol;Acc:MGI:2652820]
0	Pabpc1	4.35959e-11	-0.0980755	0.928	0.939	7.04423e-07	poly(A) binding protein, cytoplasmic 1 [Source:MGI Symbol;Acc:MGI:1349722]
0	Eif3h	4.61974e-11	0.47379	0.745	0.584	7.46457e-07	eukaryotic translation initiation factor 3, subunit H [Source:MGI Symbol;Acc:MGI:1915385]
0	Mat2a	5.20571e-11	-0.252536	0.463	0.571	8.41139e-07	methionine adenosyltransferase II, alpha [Source:MGI Symbol;Acc:MGI:2443731]
0	Eif4g2	6.51245e-11	-0.17237	0.76	0.813	1.05228e-06	eukaryotic translation initiation factor 4, gamma 2 [Source:MGI Symbol;Acc:MGI:109207]
0	Nfkbia	7.36883e-11	0.598214	0.629	0.516	1.19066e-06	nuclear factor of kappa light polypeptide gene enhancer in B cells inhibitor, alpha [Source:MGI Symbol;Acc:MGI:104741]
0	Rpsa	8.50746e-11	0.449139	0.993	0.998	1.37464e-06	ribosomal protein SA [Source:MGI Symbol;Acc:MGI:105381]
0	Celf1	1.1989e-10	-0.231149	0.515	0.587	1.93719e-06	CUGBP, Elav-like family member 1 [Source:MGI Symbol;Acc:MGI:1342295]
0	Pds5a	1.6407e-10	-0.223576	0.379	0.518	2.65104e-06	PDS5 cohesin associated factor A [Source:MGI Symbol;Acc:MGI:1918771]
0	Chordc1	1.83756e-10	-0.250644	0.285	0.416	2.96913e-06	cysteine and histidine-rich domain (CHORD)-containing, zinc-binding protein 1 [Source:MGI Symbol;Acc:MGI:1914167]
0	Ccnd2	1.89458e-10	-0.251342	0.765	0.822	3.06127e-06	cyclin D2 [Source:MGI Symbol;Acc:MGI:88314]
0	Hsph1	1.98563e-10	-0.346282	0.121	0.335	3.20837e-06	heat shock 105kDa/110kDa protein 1 [Source:MGI Symbol;Acc:MGI:105053]
0	Rpl27a	2.56832e-10	0.447356	0.998	0.995	4.1499e-06	ribosomal protein L27A [Source:MGI Symbol;Acc:MGI:1347076]
0	Fxyd5	2.57179e-10	0.487545	0.908	0.831	4.15549e-06	FXYD domain-containing ion transport regulator 5 [Source:MGI Symbol;Acc:MGI:1201785]
0	Ptprcap	2.75198e-10	0.475309	0.894	0.788	4.44665e-06	protein tyrosine phosphatase, receptor type, C polypeptide-associated protein [Source:MGI Symbol;Acc:MGI:97811]
0	Cnot6l	3.52633e-10	-0.219658	0.579	0.647	5.69784e-06	CCR4-NOT transcription complex, subunit 6-like [Source:MGI Symbol;Acc:MGI:2443154]
0	Itgal	3.54883e-10	-0.205903	0.705	0.751	5.7342e-06	integrin alpha L [Source:MGI Symbol;Acc:MGI:96606]
0	Bcl11b	4.12695e-10	-0.163722	0.842	0.849	6.66832e-06	B cell leukemia/lymphoma 11B [Source:MGI Symbol;Acc:MGI:1929913]
0	Sfpq	7.19049e-10	-0.19287	0.636	0.696	1.16184e-05	splicing factor proline/glutamine rich (polypyrimidine tract binding protein associated) [Source:MGI Symbol;Acc:MGI:1918764]
0	Fth1	8.18899e-10	0.469992	0.948	0.914	1.32318e-05	ferritin heavy polypeptide 1 [Source:MGI Symbol;Acc:MGI:95588]
0	Gng5	8.90218e-10	0.441265	0.785	0.642	1.43841e-05	guanine nucleotide binding protein (G protein), gamma 5 [Source:MGI Symbol;Acc:MGI:109164]
0	Rpl12	9.54422e-10	0.464208	0.998	0.995	1.54216e-05	ribosomal protein L12 [Source:MGI Symbol;Acc:MGI:98002]
0	Lgals1	1.24192e-09	0.534234	0.569	0.402	2.0067e-05	lectin, galactose binding, soluble 1 [Source:MGI Symbol;Acc:MGI:96777]
0	Ifi27l2a	1.29894e-09	0.668409	0.896	0.796	2.09883e-05	interferon, alpha-inducible protein 27 like 2A [Source:MGI Symbol;Acc:MGI:1924183]
0	Aldoa	1.3418e-09	0.42871	0.671	0.507	2.16807e-05	aldolase A, fructose-bisphosphate [Source:MGI Symbol;Acc:MGI:87994]
0	Rpl29	1.77918e-09	0.465055	0.428	0.244	2.8748e-05	ribosomal protein L29 [Source:MGI Symbol;Acc:MGI:99687]
0	Pfn1	1.82458e-09	0.457912	0.975	0.966	2.94816e-05	profilin 1 [Source:MGI Symbol;Acc:MGI:97549]
0	Phip	2.13003e-09	-0.215149	0.599	0.707	3.4417e-05	pleckstrin homology domain interacting protein [Source:MGI Symbol;Acc:MGI:1932404]
0	Ube2d3	2.35039e-09	-0.127399	0.834	0.868	3.79777e-05	ubiquitin-conjugating enzyme E2D 3 [Source:MGI Symbol;Acc:MGI:1913355]
0	2023-09-09	2.62066e-09	-0.188478	0.601	0.637	4.23447e-05	NA
0	Nfkb1	2.68004e-09	-0.188634	0.611	0.659	4.3304e-05	nuclear factor of kappa light polypeptide gene enhancer in B cells 1, p105 [Source:MGI Symbol;Acc:MGI:97312]
0	Arhgap9	4.0212e-09	-0.201944	0.344	0.469	6.49746e-05	Rho GTPase activating protein 9 [Source:MGI Symbol;Acc:MGI:2143764]
0	Gpx4	4.46944e-09	0.424522	0.661	0.508	7.22172e-05	glutathione peroxidase 4 [Source:MGI Symbol;Acc:MGI:104767]
0	Ddx3x	4.61956e-09	-0.214401	0.356	0.465	7.46428e-05	DEAD box helicase 3, X-linked [Source:MGI Symbol;Acc:MGI:103064]
0	Grk2	4.83374e-09	-0.163891	0.572	0.667	7.81036e-05	G protein-coupled receptor kinase 2 [Source:MGI Symbol;Acc:MGI:87940]
0	Peli1	4.87845e-09	-0.180076	0.552	0.65	7.88259e-05	pellino 1 [Source:MGI Symbol;Acc:MGI:1914495]
0	Eif3a	5.31691e-09	-0.186573	0.668	0.724	8.59107e-05	eukaryotic translation initiation factor 3, subunit A [Source:MGI Symbol;Acc:MGI:95301]
0	Ssr4	7.26171e-09	0.394228	0.559	0.321	0.000117335	signal sequence receptor, delta [Source:MGI Symbol;Acc:MGI:1099464]
0	Tardbp	7.34883e-09	-0.1814	0.478	0.601	0.000118742	TAR DNA binding protein [Source:MGI Symbol;Acc:MGI:2387629]
0	Numa1	7.88628e-09	-0.191824	0.448	0.567	0.000127427	nuclear mitotic apparatus protein 1 [Source:MGI Symbol;Acc:MGI:2443665]
0	Hspd1	8.50377e-09	-0.217654	0.361	0.479	0.000137404	heat shock protein 1 (chaperonin) [Source:MGI Symbol;Acc:MGI:96242]
0	Arid1a	9.03147e-09	-0.177815	0.55	0.631	0.00014593	AT rich interactive domain 1A (SWI-like) [Source:MGI Symbol;Acc:MGI:1935147]
0	Rpl18a	9.19014e-09	0.439342	0.998	0.997	0.000148494	ribosomal protein L18A [Source:MGI Symbol;Acc:MGI:1924058]
0	Zfp207	1.00759e-08	-0.17661	0.488	0.613	0.000162806	zinc finger protein 207 [Source:MGI Symbol;Acc:MGI:1340045]
0	Rps24	1.11148e-08	0.420393	0.998	1	0.000179593	ribosomal protein S24 [Source:MGI Symbol;Acc:MGI:98147]
0	Ltb	1.17448e-08	0.536785	0.936	0.896	0.000189772	lymphotoxin B [Source:MGI Symbol;Acc:MGI:104796]
0	Cd19	1.37512e-08	-0.289429	0.119	0.31	0.000222192	CD19 antigen [Source:MGI Symbol;Acc:MGI:88319]
0	Tnrc6b	1.37714e-08	-0.165947	0.651	0.716	0.000222518	trinucleotide repeat containing 6b [Source:MGI Symbol;Acc:MGI:2443730]
0	Mxd4	1.37941e-08	-0.228124	0.473	0.565	0.000222884	Max dimerization protein 4 [Source:MGI Symbol;Acc:MGI:104991]
0	Gm42418	1.41164e-08	-0.300421	1	1	0.000228093	NA
0	Cd2	1.43684e-08	0.417268	0.728	0.579	0.000232164	CD2 antigen [Source:MGI Symbol;Acc:MGI:88320]
0	Tmsb4x	1.52208e-08	0.405565	1	1	0.000245938	thymosin, beta 4, X chromosome [Source:MGI Symbol;Acc:MGI:99510]
0	Rassf5	1.81436e-08	-0.169176	0.579	0.634	0.000293164	Ras association (RalGDS/AF-6) domain family member 5 [Source:MGI Symbol;Acc:MGI:1926375]
0	Ost4	2.27762e-08	0.385506	0.592	0.399	0.000368017	oligosaccharyltransferase complex subunit 4 (non-catalytic) [Source:MGI Symbol;Acc:MGI:1914945]
0	Snrnp70	2.50451e-08	-0.151318	0.738	0.786	0.000404678	small nuclear ribonucleoprotein 70 (U1) [Source:MGI Symbol;Acc:MGI:98341]
0	Xiap	2.61198e-08	-0.190955	0.394	0.502	0.000422044	X-linked inhibitor of apoptosis [Source:MGI Symbol;Acc:MGI:107572]
0	mt-Cytb	2.92388e-08	0.0013029	1	1	0.00047244	mitochondrially encoded cytochrome b [Source:MGI Symbol;Acc:MGI:102501]
0	Rps23	3.10713e-08	0.402067	0.998	1	0.00050205	ribosomal protein S23 [Source:MGI Symbol;Acc:MGI:1913725]
0	Atp5g1	4.09266e-08	0.392436	0.527	0.346	0.000661292	ATP synthase, H+ transporting, mitochondrial F0 complex, subunit C1 (subunit 9) [Source:MGI Symbol;Acc:MGI:107653]
0	Heca	4.37312e-08	-0.192175	0.364	0.467	0.000706609	hdc homolog, cell cycle regulator [Source:MGI Symbol;Acc:MGI:2685715]
0	Cirbp	4.6623e-08	0.396298	0.463	0.229	0.000753335	cold inducible RNA binding protein [Source:MGI Symbol;Acc:MGI:893588]
0	Sumo2	5.52644e-08	0.40162	0.728	0.587	0.000892962	small ubiquitin-like modifier 2 [Source:MGI Symbol;Acc:MGI:2158813]
0	Sod1	5.84357e-08	-0.155997	0.48	0.602	0.000944205	superoxide dismutase 1, soluble [Source:MGI Symbol;Acc:MGI:98351]
0	Jund	7.41113e-08	0.488352	0.748	0.625	0.00119749	jun D proto-oncogene [Source:MGI Symbol;Acc:MGI:96648]
0	Nfat5	7.75414e-08	-0.195601	0.423	0.522	0.00125291	nuclear factor of activated T cells 5 [Source:MGI Symbol;Acc:MGI:1859333]
0	Rpl23a	8.42717e-08	0.0264859	0.993	0.997	0.00136166	ribosomal protein L23A [Source:MGI Symbol;Acc:MGI:3040672]
0	Sec61g	8.99583e-08	0.408194	0.696	0.576	0.00145355	SEC61, gamma subunit [Source:MGI Symbol;Acc:MGI:1202066]
0	Rps12	9.88315e-08	0.0442232	0.993	1	0.00159692	ribosomal protein S12 [Source:MGI Symbol;Acc:MGI:98105]
0	Notch1	1.03493e-07	-0.180453	0.384	0.481	0.00167225	notch 1 [Source:MGI Symbol;Acc:MGI:97363]
0	Naca	1.25801e-07	0.449958	0.931	0.873	0.00203269	nascent polypeptide-associated complex alpha polypeptide [Source:MGI Symbol;Acc:MGI:106095]
0	Mbnl1	1.65377e-07	-0.0615446	0.983	0.978	0.00267217	muscleblind like splicing factor 1 [Source:MGI Symbol;Acc:MGI:1928482]
0	Rpl22l1	1.66342e-07	0.452521	0.861	0.779	0.00268775	ribosomal protein L22 like 1 [Source:MGI Symbol;Acc:MGI:1915278]
0	Mob1a	1.74296e-07	-0.154775	0.495	0.579	0.00281627	MOB kinase activator 1A [Source:MGI Symbol;Acc:MGI:2442631]
0	Zc3hav1	1.84685e-07	-0.145642	0.545	0.616	0.00298414	zinc finger CCCH type, antiviral 1 [Source:MGI Symbol;Acc:MGI:1926031]
0	Jchain	1.97271e-07	-0.203193	0.3	0.401	0.00318751	immunoglobulin joining chain [Source:MGI Symbol;Acc:MGI:96493]
0	Sri	2.11208e-07	0.381298	0.621	0.452	0.0034127	sorcin [Source:MGI Symbol;Acc:MGI:98419]
0	Etnk1	2.22084e-07	-0.165271	0.517	0.596	0.00358843	ethanolamine kinase 1 [Source:MGI Symbol;Acc:MGI:1922570]
0	Ddx17	2.24506e-07	-0.13979	0.569	0.668	0.00362757	DEAD box helicase 17 [Source:MGI Symbol;Acc:MGI:1914290]
0	Tcf7	2.2591e-07	-0.0994221	0.876	0.854	0.00365025	transcription factor 7, T cell specific [Source:MGI Symbol;Acc:MGI:98507]
0	Strn3	2.30083e-07	-0.18737	0.277	0.39	0.00371768	striatin, calmodulin binding protein 3 [Source:MGI Symbol;Acc:MGI:2151064]
0	Rac2	2.31981e-07	0.429594	0.955	0.923	0.00374835	Rac family small GTPase 2 [Source:MGI Symbol;Acc:MGI:97846]
0	Usp25	2.41757e-07	-0.187725	0.317	0.441	0.00390632	ubiquitin specific peptidase 25 [Source:MGI Symbol;Acc:MGI:1353655]
0	Rpl37	2.4958e-07	0.426615	0.998	0.995	0.00403271	ribosomal protein L37 [Source:MGI Symbol;Acc:MGI:1914531]
0	Srgn	2.5042e-07	0.450544	0.903	0.767	0.00404628	serglycin [Source:MGI Symbol;Acc:MGI:97756]
0	Nisch	2.60935e-07	-0.148199	0.505	0.565	0.00421619	nischarin [Source:MGI Symbol;Acc:MGI:1928323]
0	Mllt6	2.61313e-07	-0.160186	0.446	0.539	0.0042223	myeloid/lymphoid or mixed-lineage leukemia; translocated to, 6 [Source:MGI Symbol;Acc:MGI:1935145]
0	Rps15	2.66003e-07	0.067612	0.995	0.992	0.00429807	ribosomal protein S15 [Source:MGI Symbol;Acc:MGI:98117]
0	Tagln2	3.68654e-07	0.418764	0.619	0.461	0.00595671	transgelin 2 [Source:MGI Symbol;Acc:MGI:1312985]
0	Prelid1	3.81214e-07	0.356861	0.569	0.358	0.00615966	PRELI domain containing 1 [Source:MGI Symbol;Acc:MGI:1913744]
0	Tra2a	4.16699e-07	-0.144968	0.537	0.584	0.00673302	transformer 2 alpha [Source:MGI Symbol;Acc:MGI:1933972]
0	Rps16	4.50842e-07	0.390008	1	0.998	0.00728471	ribosomal protein S16 [Source:MGI Symbol;Acc:MGI:98118]
0	Pde7a	4.86393e-07	-0.168367	0.403	0.496	0.00785914	phosphodiesterase 7A [Source:MGI Symbol;Acc:MGI:1202402]
0	Bptf	4.91837e-07	-0.121681	0.673	0.711	0.0079471	bromodomain PHD finger transcription factor [Source:MGI Symbol;Acc:MGI:2444008]
0	Sipa1	6.31652e-07	-0.170286	0.337	0.41	0.0102062	signal-induced proliferation associated gene 1 [Source:MGI Symbol;Acc:MGI:107576]
0	Krit1	6.46224e-07	-0.176731	0.5	0.605	0.0104417	KRIT1, ankyrin repeat containing [Source:MGI Symbol;Acc:MGI:1930618]
0	Ikzf1	7.69848e-07	-0.148053	0.55	0.593	0.0124392	IKAROS family zinc finger 1 [Source:MGI Symbol;Acc:MGI:1342540]
0	Atrx	8.05148e-07	-0.102898	0.743	0.803	0.0130096	ATRX, chromatin remodeler [Source:MGI Symbol;Acc:MGI:103067]
0	Hmgb1	9.22712e-07	0.412092	0.899	0.814	0.0149092	high mobility group box 1 [Source:MGI Symbol;Acc:MGI:96113]
0	Rps29	1.08968e-06	0.389919	1	1	0.0176071	ribosomal protein S29 [Source:MGI Symbol;Acc:MGI:107681]
0	Foxn3	1.11218e-06	-0.164344	0.389	0.507	0.0179706	forkhead box N3 [Source:MGI Symbol;Acc:MGI:1918625]
0	Wipf1	1.23355e-06	-0.136343	0.517	0.631	0.0199316	WAS/WASL interacting protein family, member 1 [Source:MGI Symbol;Acc:MGI:2178801]
0	Zfp871	1.2598e-06	-0.161076	0.314	0.445	0.0203558	zinc finger protein 871 [Source:MGI Symbol;Acc:MGI:1921793]
0	Dad1	1.31469e-06	0.358318	0.723	0.567	0.0212428	defender against cell death 1 [Source:MGI Symbol;Acc:MGI:101912]
0	Tecpr1	1.35292e-06	-0.143114	0.507	0.593	0.0218605	tectonin beta-propeller repeat containing 1 [Source:MGI Symbol;Acc:MGI:1917631]
0	Hbb-bt	1.38114e-06	0.594326	0.391	0.014	0.0223165	hemoglobin, beta adult t chain [Source:MGI Symbol;Acc:MGI:5474850]
0	Nfatc3	1.39574e-06	-0.13196	0.658	0.708	0.0225523	nuclear factor of activated T cells, cytoplasmic, calcineurin dependent 3 [Source:MGI Symbol;Acc:MGI:103296]
0	H2-Aa	1.60782e-06	-0.179841	0.272	0.398	0.0259791	histocompatibility 2, class II antigen A, alpha [Source:MGI Symbol;Acc:MGI:95895]
0	Zkscan3	1.65191e-06	-0.187921	0.233	0.344	0.0266916	zinc finger with KRAB and SCAN domains 3 [Source:MGI Symbol;Acc:MGI:1919989]
0	Aak1	1.65485e-06	-0.147852	0.446	0.515	0.0267391	AP2 associated kinase 1 [Source:MGI Symbol;Acc:MGI:1098687]
0	Cnn2	1.75654e-06	-0.0778371	0.809	0.829	0.0283821	calponin 2 [Source:MGI Symbol;Acc:MGI:105093]
0	Igha	1.8469e-06	-0.180399	0.366	0.508	0.0298423	immunoglobulin heavy constant alpha [Source:MGI Symbol;Acc:MGI:96444]
0	Ppp2r5c	2.03662e-06	-0.132901	0.592	0.61	0.0329077	protein phosphatase 2, regulatory subunit B', gamma [Source:MGI Symbol;Acc:MGI:1349475]
0	Map4k2	2.17635e-06	-0.161971	0.304	0.401	0.0351655	mitogen-activated protein kinase kinase kinase kinase 2 [Source:MGI Symbol;Acc:MGI:1346883]
0	Atf7ip	2.20618e-06	-0.139756	0.577	0.656	0.0356475	activating transcription factor 7 interacting protein [Source:MGI Symbol;Acc:MGI:1858965]
0	Matr3	2.60536e-06	-0.137116	0.527	0.57	0.0420974	matrin 3 [Source:MGI Symbol;Acc:MGI:1298379]
0	Pura	2.65008e-06	-0.154748	0.616	0.633	0.0428201	purine rich element binding protein A [Source:MGI Symbol;Acc:MGI:103079]
0	Junb	2.71904e-06	0.442772	0.653	0.518	0.0439343	jun B proto-oncogene [Source:MGI Symbol;Acc:MGI:96647]
0	Dnajb1	2.7838e-06	-0.21356	0.161	0.3	0.0449806	DnaJ heat shock protein family (Hsp40) member B1 [Source:MGI Symbol;Acc:MGI:1931874]
0	Gtf3c2	3.04366e-06	-0.16125	0.255	0.358	0.0491795	general transcription factor IIIC, polypeptide 2, beta [Source:MGI Symbol;Acc:MGI:1919002]
0	Tram1	3.06388e-06	-0.137378	0.418	0.496	0.0495061	translocating chain-associating membrane protein 1 [Source:MGI Symbol;Acc:MGI:1919515]
1	Ubb	2.36113e-88	1.2791	0.951	0.812	3.81511e-84	ubiquitin B [Source:MGI Symbol;Acc:MGI:98888]
1	Uba52	1.4302e-83	1.29651	0.916	0.694	2.31091e-79	ubiquitin A-52 residue ribosomal protein fusion product 1 [Source:MGI Symbol;Acc:MGI:98887]
1	Rps15a	4.2218e-73	1.0116	0.986	0.973	6.82159e-69	ribosomal protein S15A [Source:MGI Symbol;Acc:MGI:2389091]
1	Rpl15	2.60491e-67	0.992363	0.97	0.894	4.20901e-63	ribosomal protein L15 [Source:MGI Symbol;Acc:MGI:1913730]
1	Rps11	1.25633e-63	0.909435	0.986	0.958	2.02998e-59	ribosomal protein S11 [Source:MGI Symbol;Acc:MGI:1351329]
1	Tmsb10	7.33012e-61	0.971515	0.984	0.984	1.1844e-56	thymosin, beta 10 [Source:MGI Symbol;Acc:MGI:109146]
1	Rps3	1.45347e-58	0.874833	0.986	0.951	2.34852e-54	ribosomal protein S3 [Source:MGI Symbol;Acc:MGI:1350917]
1	Rpl10	1.25497e-57	0.952624	0.965	0.918	2.02778e-53	ribosomal protein L10 [Source:MGI Symbol;Acc:MGI:105943]
1	Rpl34	1.30158e-57	0.866851	0.989	0.971	2.1031e-53	ribosomal protein L34 [Source:MGI Symbol;Acc:MGI:1915686]
1	Rps18	1.01416e-56	0.889538	0.984	0.942	1.63868e-52	ribosomal protein S18 [Source:MGI Symbol;Acc:MGI:98146]
1	Rplp0	3.1734e-56	0.970113	0.976	0.92	5.12758e-52	ribosomal protein, large, P0 [Source:MGI Symbol;Acc:MGI:1927636]
1	Rps7	9.04686e-56	0.87645	0.989	0.969	1.46179e-51	ribosomal protein S7 [Source:MGI Symbol;Acc:MGI:1333818]
1	Rpl32	1.15086e-55	0.894024	0.986	0.962	1.85956e-51	ribosomal protein L32 [Source:MGI Symbol;Acc:MGI:98038]
1	Fau	1.28566e-55	0.825316	0.997	0.989	2.07737e-51	Finkel-Biskis-Reilly murine sarcoma virus (FBR-MuSV) ubiquitously expressed (fox derived) [Source:MGI Symbol;Acc:MGI:102547]
1	Rpl36	2.23824e-55	0.86623	0.986	0.942	3.61655e-51	ribosomal protein L36 [Source:MGI Symbol;Acc:MGI:1860603]
1	Rpl11	2.75638e-55	0.820289	0.978	0.962	4.45376e-51	ribosomal protein L11 [Source:MGI Symbol;Acc:MGI:1914275]
1	Rpl21	3.2871e-55	0.833643	0.989	0.964	5.31129e-51	ribosomal protein L21 [Source:MGI Symbol;Acc:MGI:1278340]
1	Rpl9	1.41749e-50	0.801786	0.992	0.967	2.29037e-46	ribosomal protein L9 [Source:MGI Symbol;Acc:MGI:1298373]
1	Rpl26	4.62933e-50	0.791744	0.986	0.947	7.48007e-46	ribosomal protein L26 [Source:MGI Symbol;Acc:MGI:106022]
1	Rpl8	3.03602e-48	0.76306	0.973	0.973	4.9056e-44	ribosomal protein L8 [Source:MGI Symbol;Acc:MGI:1350927]
1	Tpt1	3.05491e-48	0.776069	0.995	0.998	4.93612e-44	tumor protein, translationally-controlled 1 [Source:MGI Symbol;Acc:MGI:104890]
1	Rpl13	1.41621e-47	0.768365	0.992	0.987	2.28832e-43	ribosomal protein L13 [Source:MGI Symbol;Acc:MGI:105922]
1	H3f3b	3.79577e-46	0.835749	0.965	0.882	6.1332e-42	H3.3 histone B [Source:MGI Symbol;Acc:MGI:1101768]
1	Ppia	1.96963e-45	0.820399	0.967	0.933	3.18253e-41	peptidylprolyl isomerase A [Source:MGI Symbol;Acc:MGI:97749]
1	Rbm3	2.24145e-45	0.844487	0.837	0.641	3.62173e-41	RNA binding motif (RNP1, RRM) protein 3 [Source:MGI Symbol;Acc:MGI:1099460]
1	Rpl19	3.45795e-45	0.716143	0.984	0.989	5.58736e-41	ribosomal protein L19 [Source:MGI Symbol;Acc:MGI:98020]
1	Cd52	4.76324e-45	1.11434	0.959	0.876	7.69644e-41	CD52 antigen [Source:MGI Symbol;Acc:MGI:1346088]
1	Rps2	2.79686e-44	0.873552	0.957	0.916	4.51917e-40	ribosomal protein S2 [Source:MGI Symbol;Acc:MGI:105110]
1	Rpl17	8.74697e-44	0.717587	0.989	0.989	1.41334e-39	ribosomal protein L17 [Source:MGI Symbol;Acc:MGI:2448270]
1	Rpl27a	1.21457e-43	0.708732	0.992	0.984	1.9625e-39	ribosomal protein L27A [Source:MGI Symbol;Acc:MGI:1347076]
1	Rpl24	2.69751e-43	0.794972	0.965	0.916	4.35863e-39	ribosomal protein L24 [Source:MGI Symbol;Acc:MGI:1915443]
1	Rps5	1.38827e-41	0.791014	0.965	0.96	2.24316e-37	ribosomal protein S5 [Source:MGI Symbol;Acc:MGI:1097682]
1	H3f3a	2.54913e-39	0.726783	0.938	0.829	4.11888e-35	H3.3 histone A [Source:MGI Symbol;Acc:MGI:1097686]
1	Cd3d	5.12243e-39	0.710791	0.978	0.942	8.27682e-35	CD3 antigen, delta polypeptide [Source:MGI Symbol;Acc:MGI:88331]
1	Rpl12	9.64639e-39	0.685551	0.981	0.98	1.55866e-34	ribosomal protein L12 [Source:MGI Symbol;Acc:MGI:98002]
1	Rps4x	9.94009e-39	0.748511	0.978	0.967	1.60612e-34	ribosomal protein S4, X-linked [Source:MGI Symbol;Acc:MGI:98158]
1	Rpl14	8.31729e-38	0.720309	0.951	0.882	1.34391e-33	ribosomal protein L14 [Source:MGI Symbol;Acc:MGI:1914365]
1	Rpl28	9.34781e-38	0.768867	0.973	0.938	1.51042e-33	ribosomal protein L28 [Source:MGI Symbol;Acc:MGI:101839]
1	Rpl18	9.61754e-38	0.698824	0.989	0.965	1.554e-33	ribosomal protein L18 [Source:MGI Symbol;Acc:MGI:98003]
1	Rpl39	1.67516e-37	0.742737	0.976	0.985	2.70672e-33	ribosomal protein L39 [Source:MGI Symbol;Acc:MGI:1914498]
1	Ppib	4.36253e-37	0.753116	0.783	0.437	7.04898e-33	peptidylprolyl isomerase B [Source:MGI Symbol;Acc:MGI:97750]
1	Cd3g	6.1989e-37	0.715393	0.986	0.936	1.00162e-32	CD3 antigen, gamma polypeptide [Source:MGI Symbol;Acc:MGI:88333]
1	Rpl6	1.6496e-36	0.696996	0.973	0.951	2.66543e-32	ribosomal protein L6 [Source:MGI Symbol;Acc:MGI:108057]
1	Rps27	1.71094e-36	0.664388	0.995	0.995	2.76454e-32	ribosomal protein S27 [Source:MGI Symbol;Acc:MGI:1888676]
1	Rps10	1.09505e-35	0.6748	0.984	0.98	1.76938e-31	ribosomal protein S10 [Source:MGI Symbol;Acc:MGI:1914347]
1	Rps27a	2.68675e-35	0.655619	0.989	0.985	4.34125e-31	ribosomal protein S27A [Source:MGI Symbol;Acc:MGI:1925544]
1	H2-D1	1.2936e-34	0.653668	0.997	0.984	2.0902e-30	histocompatibility 2, D region locus 1 [Source:MGI Symbol;Acc:MGI:95896]
1	Rpl3	1.49595e-34	0.693075	0.97	0.945	2.41716e-30	ribosomal protein L3 [Source:MGI Symbol;Acc:MGI:1351605]
1	Ftl1	2.63315e-34	0.773135	0.894	0.703	4.25464e-30	ferritin light polypeptide 1 [Source:MGI Symbol;Acc:MGI:95589]
1	Rps16	5.44736e-34	0.631163	0.992	0.995	8.80184e-30	ribosomal protein S16 [Source:MGI Symbol;Acc:MGI:98118]
1	Rpsa	9.70685e-34	0.655995	0.992	0.989	1.56843e-29	ribosomal protein SA [Source:MGI Symbol;Acc:MGI:105381]
1	Rps13	1.07661e-33	0.656704	0.984	0.991	1.73959e-29	ribosomal protein S13 [Source:MGI Symbol;Acc:MGI:1915302]
1	Rpl18a	2.60686e-33	0.680217	0.989	0.978	4.21216e-29	ribosomal protein L18A [Source:MGI Symbol;Acc:MGI:1924058]
1	Rps24	3.32963e-33	0.625927	1	0.996	5.38002e-29	ribosomal protein S24 [Source:MGI Symbol;Acc:MGI:98147]
1	Rps29	1.68419e-32	0.59845	1	0.996	2.72131e-28	ribosomal protein S29 [Source:MGI Symbol;Acc:MGI:107681]
1	Pfdn5	8.71252e-32	0.678329	0.902	0.719	1.40777e-27	prefoldin 5 [Source:MGI Symbol;Acc:MGI:1928753]
1	Rpl35	1.46265e-31	0.707034	0.943	0.883	2.36334e-27	ribosomal protein L35 [Source:MGI Symbol;Acc:MGI:1913739]
1	Rpl38	2.6157e-31	0.629977	0.986	0.985	4.22645e-27	ribosomal protein L38 [Source:MGI Symbol;Acc:MGI:1914921]
1	Rps23	2.72933e-31	0.58707	0.986	0.987	4.41004e-27	ribosomal protein S23 [Source:MGI Symbol;Acc:MGI:1913725]
1	Rpl30	9.7489e-31	0.602671	0.984	0.987	1.57523e-26	ribosomal protein L30 [Source:MGI Symbol;Acc:MGI:98037]
1	Pfn1	1.20667e-30	0.689258	0.976	0.949	1.94974e-26	profilin 1 [Source:MGI Symbol;Acc:MGI:97549]
1	Naca	1.4384e-30	0.65868	0.924	0.823	2.32417e-26	nascent polypeptide-associated complex alpha polypeptide [Source:MGI Symbol;Acc:MGI:106095]
1	Rps3a1	3.14495e-29	0.584394	0.989	0.991	5.08162e-25	ribosomal protein S3A1 [Source:MGI Symbol;Acc:MGI:1202063]
1	S100a11	4.0876e-29	0.721849	0.862	0.723	6.60474e-25	S100 calcium binding protein A11 [Source:MGI Symbol;Acc:MGI:1338798]
1	Rpl10a	9.32887e-29	0.653834	0.946	0.885	1.50736e-24	ribosomal protein L10A [Source:MGI Symbol;Acc:MGI:1343877]
1	Rpl23	1.47209e-28	0.557086	0.986	0.985	2.37861e-24	ribosomal protein L23 [Source:MGI Symbol;Acc:MGI:1929455]
1	Itm2b	2.3117e-28	0.644702	0.951	0.84	3.73525e-24	integral membrane protein 2B [Source:MGI Symbol;Acc:MGI:1309517]
1	Eif1	4.39185e-28	0.640565	0.959	0.929	7.09635e-24	eukaryotic translation initiation factor 1 [Source:MGI Symbol;Acc:MGI:105125]
1	Rps20	5.30512e-28	0.589524	0.992	0.987	8.57201e-24	ribosomal protein S20 [Source:MGI Symbol;Acc:MGI:1914677]
1	Rpl37	7.28864e-28	0.602114	0.981	0.987	1.1777e-23	ribosomal protein L37 [Source:MGI Symbol;Acc:MGI:1914531]
1	Cox8a	1.05519e-27	0.695632	0.835	0.659	1.70498e-23	cytochrome c oxidase subunit 8A [Source:MGI Symbol;Acc:MGI:105959]
1	AY036118	1.12588e-27	0.731429	0.729	0.466	1.81919e-23	NA
1	Gapdh	1.31199e-27	0.729126	0.9	0.789	2.11991e-23	glyceraldehyde-3-phosphate dehydrogenase [Source:MGI Symbol;Acc:MGI:95640]
1	Elob	4.3597e-27	0.637487	0.799	0.57	7.0444e-23	elongin B [Source:MGI Symbol;Acc:MGI:1914923]
1	Rpl13a	2.30843e-26	0.541595	0.992	1	3.72997e-22	ribosomal protein L13A [Source:MGI Symbol;Acc:MGI:1351455]
1	Trbc2	3.43473e-26	0.773956	0.951	0.909	5.54983e-22	T cell receptor beta, constant 2 [Source:MGI Symbol;Acc:MGI:4835227]
1	Rps21	4.10348e-26	0.562283	0.992	0.998	6.6304e-22	ribosomal protein S21 [Source:MGI Symbol;Acc:MGI:1913731]
1	Tspo	5.26879e-26	0.61932	0.724	0.483	8.5133e-22	translocator protein [Source:MGI Symbol;Acc:MGI:88222]
1	Ifi27l2a	5.92007e-26	0.953396	0.902	0.725	9.56564e-22	interferon, alpha-inducible protein 27 like 2A [Source:MGI Symbol;Acc:MGI:1924183]
1	Psmb8	3.13551e-25	0.674469	0.816	0.645	5.06636e-21	proteasome (prosome, macropain) subunit, beta type 8 (large multifunctional peptidase 7) [Source:MGI Symbol;Acc:MGI:1346527]
1	Rps14	7.26971e-25	0.548511	0.986	0.98	1.17464e-20	ribosomal protein S14 [Source:MGI Symbol;Acc:MGI:98107]
1	Malat1	2.17125e-24	0.495134	1	1	3.50831e-20	metastasis associated lung adenocarcinoma transcript 1 (non-coding RNA) [Source:MGI Symbol;Acc:MGI:1919539]
1	Eef1a1	2.45852e-23	0.510888	0.997	1	3.97248e-19	eukaryotic translation elongation factor 1 alpha 1 [Source:MGI Symbol;Acc:MGI:1096881]
1	Ptprcap	2.57484e-23	0.598948	0.957	0.845	4.16043e-19	protein tyrosine phosphatase, receptor type, C polypeptide-associated protein [Source:MGI Symbol;Acc:MGI:97811]
1	Tmsb4x	5.78058e-23	0.551517	0.997	0.998	9.34026e-19	thymosin, beta 4, X chromosome [Source:MGI Symbol;Acc:MGI:99510]
1	Clic1	6.43023e-23	0.58824	0.783	0.601	1.039e-18	chloride intracellular channel 1 [Source:MGI Symbol;Acc:MGI:2148924]
1	Sri	1.16946e-22	0.55867	0.715	0.428	1.88962e-18	sorcin [Source:MGI Symbol;Acc:MGI:98419]
1	Rpl7a	2.07733e-22	0.552222	0.927	0.871	3.35655e-18	ribosomal protein L7A [Source:MGI Symbol;Acc:MGI:1353472]
1	Mif	4.03831e-22	0.69899	0.615	0.384	6.5251e-18	macrophage migration inhibitory factor (glycosylation-inhibiting factor) [Source:MGI Symbol;Acc:MGI:96982]
1	Sec61g	9.19464e-22	0.571785	0.737	0.523	1.48567e-17	SEC61, gamma subunit [Source:MGI Symbol;Acc:MGI:1202066]
1	Spcs2	9.56561e-22	0.547382	0.737	0.517	1.54561e-17	signal peptidase complex subunit 2 homolog (S. cerevisiae) [Source:MGI Symbol;Acc:MGI:1913874]
1	Rnaset2a	9.8512e-22	0.621374	0.71	0.503	1.59176e-17	ribonuclease T2A [Source:MGI Symbol;Acc:MGI:1915445]
1	Hmgb1	4.2109e-21	0.5578	0.932	0.863	6.80398e-17	high mobility group box 1 [Source:MGI Symbol;Acc:MGI:96113]
1	Oaz1	1.08423e-20	0.550268	0.94	0.889	1.75189e-16	ornithine decarboxylase antizyme 1 [Source:MGI Symbol;Acc:MGI:109433]
1	Hsp90aa1	1.112e-20	-0.556299	0.661	0.776	1.79677e-16	heat shock protein 90, alpha (cytosolic), class A member 1 [Source:MGI Symbol;Acc:MGI:96250]
1	Rps25	1.22386e-20	0.49888	0.954	0.923	1.97752e-16	ribosomal protein S25 [Source:MGI Symbol;Acc:MGI:1922867]
1	Rps19	1.29219e-20	0.500573	0.997	0.987	2.08792e-16	ribosomal protein S19 [Source:MGI Symbol;Acc:MGI:1333780]
1	Arpc3	1.29329e-20	0.54544	0.68	0.47	2.0897e-16	actin related protein 2/3 complex, subunit 3 [Source:MGI Symbol;Acc:MGI:1928375]
1	Cirbp	1.47413e-20	0.550334	0.531	0.226	2.3819e-16	cold inducible RNA binding protein [Source:MGI Symbol;Acc:MGI:893588]
1	Rack1	1.92668e-20	0.496172	0.957	0.933	3.11313e-16	receptor for activated C kinase 1 [Source:MGI Symbol;Acc:MGI:101849]
1	Selenow	1.9314e-20	0.522007	0.802	0.57	3.12076e-16	selenoprotein W [Source:MGI Symbol;Acc:MGI:1100878]
1	Rps8	2.77053e-20	0.490266	0.986	0.996	4.47663e-16	ribosomal protein S8 [Source:MGI Symbol;Acc:MGI:98166]
1	Rpl27	5.23411e-20	0.558938	0.973	0.958	8.45727e-16	ribosomal protein L27 [Source:MGI Symbol;Acc:MGI:98036]
1	Aldoa	9.29476e-20	0.584941	0.775	0.541	1.50185e-15	aldolase A, fructose-bisphosphate [Source:MGI Symbol;Acc:MGI:87994]
1	Atp5g2	1.39255e-19	0.496665	0.794	0.678	2.25008e-15	ATP synthase, H+ transporting, mitochondrial F0 complex, subunit C2 (subunit 9) [Source:MGI Symbol;Acc:MGI:1915192]
1	Gm10076	1.90892e-19	0.563835	0.919	0.883	3.08443e-15	predicted gene 10076 [Source:MGI Symbol;Acc:MGI:3704451]
1	Nme2	4.1397e-19	0.531317	0.615	0.388	6.68893e-15	NME/NM23 nucleoside diphosphate kinase 2 [Source:MGI Symbol;Acc:MGI:97356]
1	Btf3	4.96665e-19	0.516807	0.84	0.732	8.02512e-15	basic transcription factor 3 [Source:MGI Symbol;Acc:MGI:1202875]
1	Cyba	6.47424e-19	0.636961	0.78	0.625	1.04611e-14	cytochrome b-245, alpha polypeptide [Source:MGI Symbol;Acc:MGI:1316658]
1	Edf1	6.80139e-19	0.521532	0.618	0.393	1.09897e-14	endothelial differentiation-related factor 1 [Source:MGI Symbol;Acc:MGI:1891227]
1	Sh3bgrl3	1.06911e-18	0.614786	0.827	0.705	1.72747e-14	SH3 domain binding glutamic acid-rich protein-like 3 [Source:MGI Symbol;Acc:MGI:1920973]
1	Ost4	1.64383e-18	0.513576	0.626	0.366	2.6561e-14	oligosaccharyltransferase complex subunit 4 (non-catalytic) [Source:MGI Symbol;Acc:MGI:1914945]
1	mt-Co1	2.28387e-18	-0.139889	1	1	3.69027e-14	mitochondrially encoded cytochrome c oxidase I [Source:MGI Symbol;Acc:MGI:102504]
1	Eif3k	4.55519e-18	0.498947	0.686	0.49	7.36028e-14	eukaryotic translation initiation factor 3, subunit K [Source:MGI Symbol;Acc:MGI:1921080]
1	Fth1	4.66879e-18	0.539608	0.943	0.925	7.54383e-14	ferritin heavy polypeptide 1 [Source:MGI Symbol;Acc:MGI:95588]
1	Gm8369	5.03147e-18	0.519497	0.607	0.412	8.12985e-14	predicted gene 8369 [Source:MGI Symbol;Acc:MGI:3645380]
1	Eno1	6.26663e-18	0.510369	0.545	0.35	1.01256e-13	enolase 1, alpha non-neuron [Source:MGI Symbol;Acc:MGI:95393]
1	Myl12b	6.52275e-18	0.490966	0.743	0.559	1.05395e-13	myosin, light chain 12B, regulatory [Source:MGI Symbol;Acc:MGI:107494]
1	Uqcrb	7.88618e-18	0.483524	0.588	0.311	1.27425e-13	ubiquinol-cytochrome c reductase binding protein [Source:MGI Symbol;Acc:MGI:1914780]
1	Sumo2	1.18384e-17	0.523112	0.721	0.539	1.91285e-13	small ubiquitin-like modifier 2 [Source:MGI Symbol;Acc:MGI:2158813]
1	Rplp1	1.32585e-17	0.445809	0.989	0.996	2.14231e-13	ribosomal protein, large, P1 [Source:MGI Symbol;Acc:MGI:1927099]
1	Fxyd5	1.34664e-17	0.507937	0.927	0.845	2.17591e-13	FXYD domain-containing ion transport regulator 5 [Source:MGI Symbol;Acc:MGI:1201785]
1	Rpl7	1.38721e-17	0.50259	0.946	0.958	2.24145e-13	ribosomal protein L7 [Source:MGI Symbol;Acc:MGI:98073]
1	Eif3f	1.40003e-17	0.489579	0.813	0.654	2.26216e-13	eukaryotic translation initiation factor 3, subunit F [Source:MGI Symbol;Acc:MGI:1913335]
1	Ndufa7	1.62502e-17	0.492171	0.667	0.401	2.62571e-13	NADH:ubiquinone oxidoreductase subunit A7 [Source:MGI Symbol;Acc:MGI:1913666]
1	Hba-a1	1.93232e-17	0.805997	0.472	0.042	3.12225e-13	hemoglobin alpha, adult chain 1 [Source:MGI Symbol;Acc:MGI:96015]
1	Ltb	2.83834e-17	0.579991	0.951	0.907	4.58619e-13	lymphotoxin B [Source:MGI Symbol;Acc:MGI:104796]
1	Eif3h	3.49987e-17	0.484892	0.659	0.494	5.65509e-13	eukaryotic translation initiation factor 3, subunit H [Source:MGI Symbol;Acc:MGI:1915385]
1	Rpl22	4.60037e-17	0.471183	0.959	0.953	7.43329e-13	ribosomal protein L22 [Source:MGI Symbol;Acc:MGI:99262]
1	Rbx1	7.053e-17	0.462851	0.686	0.454	1.13962e-12	ring-box 1 [Source:MGI Symbol;Acc:MGI:1891829]
1	Atp5g1	1.07717e-16	0.505984	0.547	0.326	1.7405e-12	ATP synthase, H+ transporting, mitochondrial F0 complex, subunit C1 (subunit 9) [Source:MGI Symbol;Acc:MGI:107653]
1	Tle5	1.4936e-16	0.495053	0.808	0.647	2.41336e-12	TLE family member 5, transcriptional modulator [Source:MGI Symbol;Acc:MGI:95806]
1	Trac	1.58953e-16	0.520052	0.965	0.893	2.56837e-12	T cell receptor alpha constant [Source:MGI Symbol;Acc:MGI:4439838]
1	Ptma	2.85579e-16	0.515764	0.97	0.951	4.61439e-12	prothymosin alpha [Source:MGI Symbol;Acc:MGI:97803]
1	Rgs10	3.99359e-16	0.628537	0.596	0.403	6.45284e-12	regulator of G-protein signalling 10 [Source:MGI Symbol;Acc:MGI:1915115]
1	Rnaset2b	4.32015e-16	0.515673	0.572	0.408	6.98051e-12	ribonuclease T2B [Source:MGI Symbol;Acc:MGI:3702087]
1	Cox5b	4.79563e-16	0.477918	0.618	0.413	7.74878e-12	cytochrome c oxidase subunit 5B [Source:MGI Symbol;Acc:MGI:88475]
1	Snrpd2	5.76305e-16	0.473899	0.585	0.362	9.31194e-12	small nuclear ribonucleoprotein D2 [Source:MGI Symbol;Acc:MGI:98345]
1	Rps28	1.0408e-15	0.430062	0.978	0.976	1.68173e-11	ribosomal protein S28 [Source:MGI Symbol;Acc:MGI:1859516]
1	Atp5e	1.12483e-15	0.495712	0.9	0.789	1.81751e-11	ATP synthase, H+ transporting, mitochondrial F1 complex, epsilon subunit [Source:MGI Symbol;Acc:MGI:1855697]
1	Gpx4	1.81895e-15	0.480076	0.667	0.541	2.93906e-11	glutathione peroxidase 4 [Source:MGI Symbol;Acc:MGI:104767]
1	Ssr4	2.0164e-15	0.489306	0.531	0.295	3.2581e-11	signal sequence receptor, delta [Source:MGI Symbol;Acc:MGI:1099464]
1	Atp5j2	2.67617e-15	0.462569	0.748	0.581	4.32416e-11	ATP synthase, H+ transporting, mitochondrial F0 complex, subunit F2 [Source:MGI Symbol;Acc:MGI:1927558]
1	Ndufa13	3.56547e-15	0.475829	0.77	0.605	5.76109e-11	NADH:ubiquinone oxidoreductase subunit A13 [Source:MGI Symbol;Acc:MGI:1914434]
1	Dad1	4.07624e-15	0.461689	0.772	0.603	6.58639e-11	defender against cell death 1 [Source:MGI Symbol;Acc:MGI:101912]
1	Rpl35a	5.53498e-15	0.400054	0.986	0.993	8.94341e-11	ribosomal protein L35A [Source:MGI Symbol;Acc:MGI:1928894]
1	Eef1b2	6.15089e-15	0.45934	0.908	0.852	9.93861e-11	eukaryotic translation elongation factor 1 beta 2 [Source:MGI Symbol;Acc:MGI:1929520]
1	Rac2	6.29027e-15	0.463495	0.924	0.865	1.01638e-10	Rac family small GTPase 2 [Source:MGI Symbol;Acc:MGI:97846]
1	Cox6c	6.97289e-15	0.485593	0.851	0.667	1.12668e-10	cytochrome c oxidase subunit 6C [Source:MGI Symbol;Acc:MGI:104614]
1	Bcl2a1b	7.39752e-15	0.532458	0.631	0.419	1.19529e-10	B cell leukemia/lymphoma 2 related protein A1b [Source:MGI Symbol;Acc:MGI:1278326]
1	Actb	7.58321e-15	0.425101	1	0.998	1.22529e-10	actin, beta [Source:MGI Symbol;Acc:MGI:87904]
1	Ifi27	8.04469e-15	0.467802	0.515	0.246	1.29986e-10	interferon, alpha-inducible protein 27 [Source:MGI Symbol;Acc:MGI:1277180]
1	Atp5d	1.14274e-14	0.438012	0.642	0.461	1.84643e-10	ATP synthase, H+ transporting, mitochondrial F1 complex, delta subunit [Source:MGI Symbol;Acc:MGI:1913293]
1	Cox7b	1.695e-14	0.458292	0.569	0.344	2.73877e-10	cytochrome c oxidase subunit 7B [Source:MGI Symbol;Acc:MGI:1913392]
1	Ptpn18	1.78753e-14	0.473581	0.859	0.738	2.88829e-10	protein tyrosine phosphatase, non-receptor type 18 [Source:MGI Symbol;Acc:MGI:108410]
1	H2-Q4	1.81812e-14	0.457513	0.81	0.648	2.93772e-10	histocompatibility 2, Q region locus 4 [Source:MGI Symbol;Acc:MGI:95933]
1	S100a10	1.84483e-14	0.562849	0.875	0.75	2.98087e-10	S100 calcium binding protein A10 (calpactin) [Source:MGI Symbol;Acc:MGI:1339468]
1	Gng5	1.88459e-14	0.455375	0.775	0.607	3.04512e-10	guanine nucleotide binding protein (G protein), gamma 5 [Source:MGI Symbol;Acc:MGI:109164]
1	Rpl5	3.05676e-14	0.428735	0.973	0.976	4.93912e-10	ribosomal protein L5 [Source:MGI Symbol;Acc:MGI:102854]
1	Ube2i	3.73523e-14	0.426735	0.653	0.474	6.03539e-10	ubiquitin-conjugating enzyme E2I [Source:MGI Symbol;Acc:MGI:107365]
1	Atp5b	1.20876e-13	0.439612	0.743	0.545	1.95311e-09	ATP synthase, H+ transporting mitochondrial F1 complex, beta subunit [Source:MGI Symbol;Acc:MGI:107801]
1	Limd2	1.22057e-13	0.465078	0.886	0.798	1.97219e-09	LIM domain containing 2 [Source:MGI Symbol;Acc:MGI:1915053]
1	Rps6	1.36715e-13	0.408441	0.973	0.956	2.20903e-09	ribosomal protein S6 [Source:MGI Symbol;Acc:MGI:98159]
1	Lgals1	1.37277e-13	0.645379	0.442	0.259	2.21812e-09	lectin, galactose binding, soluble 1 [Source:MGI Symbol;Acc:MGI:96777]
1	Emp3	1.82534e-13	0.486405	0.583	0.408	2.94939e-09	epithelial membrane protein 3 [Source:MGI Symbol;Acc:MGI:1098729]
1	Cox7a2	1.84482e-13	0.431922	0.634	0.441	2.98086e-09	cytochrome c oxidase subunit 7A2 [Source:MGI Symbol;Acc:MGI:1316715]
1	Supt4a	2.2551e-13	0.428103	0.612	0.412	3.6438e-09	SPT4A, DSIF elongation factor subunit [Source:MGI Symbol;Acc:MGI:107416]
1	Serf2	2.46991e-13	0.440779	0.892	0.838	3.99088e-09	small EDRK-rich factor 2 [Source:MGI Symbol;Acc:MGI:1337041]
1	Snrpf	3.41884e-13	0.413455	0.721	0.546	5.52416e-09	small nuclear ribonucleoprotein polypeptide F [Source:MGI Symbol;Acc:MGI:1917128]
1	Ngp	3.58888e-13	-0.409269	0.192	0.457	5.79892e-09	neutrophilic granule protein [Source:MGI Symbol;Acc:MGI:105983]
1	Rnasek	5.54643e-13	0.42352	0.593	0.361	8.96192e-09	ribonuclease, RNase K [Source:MGI Symbol;Acc:MGI:106369]
1	Lars2	6.312e-13	0.487738	0.892	0.876	1.01989e-08	leucyl-tRNA synthetase, mitochondrial [Source:MGI Symbol;Acc:MGI:2142973]
1	S100a9	6.6192e-13	-0.415423	0.631	0.829	1.06953e-08	S100 calcium binding protein A9 (calgranulin B) [Source:MGI Symbol;Acc:MGI:1338947]
1	Skap1	7.05314e-13	0.426708	0.794	0.638	1.13965e-08	src family associated phosphoprotein 1 [Source:MGI Symbol;Acc:MGI:1925723]
1	Rpl41	8.19295e-13	0.385782	0.992	0.995	1.32382e-08	ribosomal protein L41 [Source:MGI Symbol;Acc:MGI:1915195]
1	Rpl36al	9.52248e-13	0.433059	0.894	0.785	1.53864e-08	ribosomal protein L36A-like [Source:MGI Symbol;Acc:MGI:1913733]
1	Prelid1	1.12047e-12	0.411493	0.569	0.359	1.81045e-08	PRELI domain containing 1 [Source:MGI Symbol;Acc:MGI:1913744]
1	Myl6	1.1561e-12	0.417364	0.935	0.887	1.86803e-08	myosin, light polypeptide 6, alkali, smooth muscle and non-muscle [Source:MGI Symbol;Acc:MGI:109318]
1	Son	1.19575e-12	0.406302	0.932	0.862	1.93209e-08	Son DNA binding protein [Source:MGI Symbol;Acc:MGI:98353]
1	Sec11c	1.55766e-12	0.447806	0.553	0.404	2.51686e-08	SEC11 homolog C, signal peptidase complex subunit [Source:MGI Symbol;Acc:MGI:1913536]
1	Selenok	1.65023e-12	0.39989	0.612	0.412	2.66644e-08	selenoprotein K [Source:MGI Symbol;Acc:MGI:1931466]
1	Park7	2.07521e-12	0.394893	0.585	0.406	3.35313e-08	Parkinson disease (autosomal recessive, early onset) 7 [Source:MGI Symbol;Acc:MGI:2135637]
1	Atp5h	2.15985e-12	0.420492	0.832	0.692	3.48989e-08	ATP synthase, H+ transporting, mitochondrial F0 complex, subunit D [Source:MGI Symbol;Acc:MGI:1918929]
1	Rpl36a	2.41059e-12	0.415767	0.921	0.893	3.89503e-08	ribosomal protein L36A [Source:MGI Symbol;Acc:MGI:1201789]
1	Atp5j	2.66603e-12	0.431909	0.713	0.55	4.30777e-08	ATP synthase, H+ transporting, mitochondrial F0 complex, subunit F [Source:MGI Symbol;Acc:MGI:107777]
1	Atp5c1	2.71631e-12	0.398207	0.58	0.404	4.38902e-08	ATP synthase, H+ transporting, mitochondrial F1 complex, gamma polypeptide 1 [Source:MGI Symbol;Acc:MGI:1261437]
1	Cfl1	2.97589e-12	0.436256	0.905	0.858	4.80844e-08	cofilin 1, non-muscle [Source:MGI Symbol;Acc:MGI:101757]
1	Pkp3	3.56082e-12	0.419486	0.561	0.395	5.75357e-08	plakophilin 3 [Source:MGI Symbol;Acc:MGI:1891830]
1	Pycard	3.67073e-12	0.398688	0.55	0.299	5.93116e-08	PYD and CARD domain containing [Source:MGI Symbol;Acc:MGI:1931465]
1	Hcst	4.18698e-12	0.474193	0.78	0.636	6.76532e-08	hematopoietic cell signal transducer [Source:MGI Symbol;Acc:MGI:1344360]
1	Atp5l	4.34493e-12	0.432009	0.805	0.659	7.02054e-08	ATP synthase, H+ transporting, mitochondrial F0 complex, subunit G [Source:MGI Symbol;Acc:MGI:1351597]
1	Polr1d	4.62704e-12	0.395021	0.602	0.406	7.47637e-08	polymerase (RNA) I polypeptide D [Source:MGI Symbol;Acc:MGI:108403]
1	Cox4i1	5.07387e-12	0.390717	0.875	0.787	8.19836e-08	cytochrome c oxidase subunit 4I1 [Source:MGI Symbol;Acc:MGI:88473]
1	Rps26	6.13273e-12	0.400111	0.986	0.974	9.90926e-08	ribosomal protein S26 [Source:MGI Symbol;Acc:MGI:1351628]
1	Sh2d1a	6.1593e-12	0.506505	0.615	0.505	9.95219e-08	SH2 domain containing 1A [Source:MGI Symbol;Acc:MGI:1328352]
1	Rbl2	6.3431e-12	0.397249	0.631	0.421	1.02492e-07	RB transcriptional corepressor like 2 [Source:MGI Symbol;Acc:MGI:105085]
1	Atp5o	6.9187e-12	0.405125	0.518	0.299	1.11792e-07	ATP synthase, H+ transporting, mitochondrial F1 complex, O subunit [Source:MGI Symbol;Acc:MGI:106341]
1	Uqcr10	7.79335e-12	0.43599	0.596	0.454	1.25925e-07	ubiquinol-cytochrome c reductase, complex III subunit X [Source:MGI Symbol;Acc:MGI:1913402]
1	Psmb1	7.86128e-12	0.398465	0.688	0.532	1.27023e-07	proteasome (prosome, macropain) subunit, beta type 1 [Source:MGI Symbol;Acc:MGI:104884]
1	Ndufv3	8.52406e-12	0.395922	0.545	0.344	1.37732e-07	NADH:ubiquinone oxidoreductase core subunit V3 [Source:MGI Symbol;Acc:MGI:1890894]
1	Rpl29	1.12219e-11	0.470729	0.415	0.188	1.81324e-07	ribosomal protein L29 [Source:MGI Symbol;Acc:MGI:99687]
1	Grcc10	1.49118e-11	0.414488	0.756	0.614	2.40945e-07	gene rich cluster, C10 gene [Source:MGI Symbol;Acc:MGI:1315201]
1	Rpl22l1	1.62941e-11	0.450048	0.767	0.667	2.63279e-07	ribosomal protein L22 like 1 [Source:MGI Symbol;Acc:MGI:1915278]
1	Cox7c	3.43755e-11	0.408037	0.835	0.69	5.55439e-07	cytochrome c oxidase subunit 7C [Source:MGI Symbol;Acc:MGI:103226]
1	Clta	3.89399e-11	0.373877	0.591	0.413	6.29191e-07	clathrin, light polypeptide (Lca) [Source:MGI Symbol;Acc:MGI:894297]
1	Atp5k	4.86751e-11	0.39784	0.58	0.428	7.86493e-07	ATP synthase, H+ transporting, mitochondrial F1F0 complex, subunit E [Source:MGI Symbol;Acc:MGI:106636]
1	Atp6v1f	5.6864e-11	0.378731	0.602	0.441	9.18808e-07	ATPase, H+ transporting, lysosomal V1 subunit F [Source:MGI Symbol;Acc:MGI:1913394]
1	Ms4a4b	8.05935e-11	0.593339	0.732	0.621	1.30223e-06	membrane-spanning 4-domains, subfamily A, member 4B [Source:MGI Symbol;Acc:MGI:1913083]
1	Hbb-bt	9.0971e-11	0.685533	0.396	0.018	1.46991e-06	hemoglobin, beta adult t chain [Source:MGI Symbol;Acc:MGI:5474850]
1	Eef1d	9.11548e-11	0.370713	0.615	0.485	1.47288e-06	eukaryotic translation elongation factor 1 delta (guanine nucleotide exchange protein) [Source:MGI Symbol;Acc:MGI:1913906]
1	Rps9	9.8761e-11	0.343657	0.992	0.993	1.59578e-06	ribosomal protein S9 [Source:MGI Symbol;Acc:MGI:1924096]
1	Mrpl52	9.97036e-11	0.396255	0.718	0.59	1.61101e-06	mitochondrial ribosomal protein L52 [Source:MGI Symbol;Acc:MGI:1916086]
1	Tnfrsf4	1.23453e-10	0.58679	0.637	0.499	1.99475e-06	tumor necrosis factor receptor superfamily, member 4 [Source:MGI Symbol;Acc:MGI:104512]
1	Rpl37a	1.30587e-10	0.330876	0.989	0.998	2.11003e-06	ribosomal protein L37a [Source:MGI Symbol;Acc:MGI:98068]
1	Snrpg	1.36618e-10	0.405399	0.789	0.658	2.20747e-06	small nuclear ribonucleoprotein polypeptide G [Source:MGI Symbol;Acc:MGI:1915261]
1	Cd3e	1.4282e-10	0.38108	0.976	0.934	2.30769e-06	CD3 antigen, epsilon polypeptide [Source:MGI Symbol;Acc:MGI:88332]
1	2023-09-01	1.47264e-10	0.379588	0.726	0.554	2.37949e-06	NA
1	Tmem134	1.57592e-10	0.360861	0.564	0.361	2.54638e-06	transmembrane protein 134 [Source:MGI Symbol;Acc:MGI:1914240]
1	Ndufa3	1.71975e-10	0.363877	0.626	0.483	2.77877e-06	NADH:ubiquinone oxidoreductase subunit A3 [Source:MGI Symbol;Acc:MGI:1913341]
1	Rap1a	1.73503e-10	0.381519	0.672	0.508	2.80346e-06	RAS-related protein 1a [Source:MGI Symbol;Acc:MGI:97852]
1	Tmem258	1.8668e-10	0.394893	0.569	0.357	3.01638e-06	transmembrane protein 258 [Source:MGI Symbol;Acc:MGI:1916288]
1	Vps28	1.92204e-10	0.363968	0.512	0.313	3.10564e-06	vacuolar protein sorting 28 [Source:MGI Symbol;Acc:MGI:1914164]
1	Pkm	2.24794e-10	0.399582	0.729	0.577	3.63222e-06	pyruvate kinase, muscle [Source:MGI Symbol;Acc:MGI:97591]
1	S100a8	2.26664e-10	-0.365695	0.602	0.838	3.66244e-06	S100 calcium binding protein A8 (calgranulin A) [Source:MGI Symbol;Acc:MGI:88244]
1	Srgn	2.31915e-10	0.551875	0.927	0.843	3.74728e-06	serglycin [Source:MGI Symbol;Acc:MGI:97756]
1	Cox7a2l	2.35137e-10	0.37323	0.678	0.55	3.79934e-06	cytochrome c oxidase subunit 7A2 like [Source:MGI Symbol;Acc:MGI:106015]
1	Uqcrq	2.47442e-10	0.366004	0.599	0.432	3.99817e-06	ubiquinol-cytochrome c reductase, complex III subunit VII [Source:MGI Symbol;Acc:MGI:107807]
1	Gimap1	2.74184e-10	0.404296	0.87	0.776	4.43027e-06	GTPase, IMAP family member 1 [Source:MGI Symbol;Acc:MGI:109368]
1	Sec61b	3.00133e-10	0.368682	0.732	0.559	4.84955e-06	Sec61 beta subunit [Source:MGI Symbol;Acc:MGI:1913462]
1	Nfkbia	3.21404e-10	0.519836	0.648	0.515	5.19325e-06	nuclear factor of kappa light polypeptide gene enhancer in B cells inhibitor, alpha [Source:MGI Symbol;Acc:MGI:104741]
1	mt-Nd1	3.65601e-10	0.272709	0.997	0.995	5.90738e-06	mitochondrially encoded NADH dehydrogenase 1 [Source:MGI Symbol;Acc:MGI:101787]
1	Psma2	4.27067e-10	0.350246	0.602	0.426	6.90055e-06	proteasome subunit alpha 2 [Source:MGI Symbol;Acc:MGI:104885]
1	Txn1	4.55064e-10	0.395202	0.623	0.474	7.35293e-06	thioredoxin 1 [Source:MGI Symbol;Acc:MGI:98874]
1	Ndufb8	4.61447e-10	0.363006	0.496	0.282	7.45606e-06	NADH:ubiquinone oxidoreductase subunit B8 [Source:MGI Symbol;Acc:MGI:1914514]
1	Hnrnpd	4.98711e-10	0.358446	0.648	0.457	8.05818e-06	heterogeneous nuclear ribonucleoprotein D [Source:MGI Symbol;Acc:MGI:101947]
1	Wdr83os	5.12267e-10	0.357764	0.491	0.302	8.27722e-06	WD repeat domain 83 opposite strand [Source:MGI Symbol;Acc:MGI:3041257]
1	Gimap6	5.5405e-10	0.378103	0.84	0.718	8.95234e-06	GTPase, IMAP family member 6 [Source:MGI Symbol;Acc:MGI:1918876]
1	Tomm6	5.60305e-10	0.351316	0.629	0.446	9.05341e-06	translocase of outer mitochondrial membrane 6 [Source:MGI Symbol;Acc:MGI:1913369]
1	Slfn2	5.8364e-10	0.409687	0.797	0.71	9.43046e-06	schlafen 2 [Source:MGI Symbol;Acc:MGI:1313258]
1	Cox6b1	5.96754e-10	0.370065	0.737	0.594	9.64235e-06	cytochrome c oxidase, subunit 6B1 [Source:MGI Symbol;Acc:MGI:107460]
1	Sdf4	5.99877e-10	0.428855	0.77	0.648	9.69281e-06	stromal cell derived factor 4 [Source:MGI Symbol;Acc:MGI:108079]
1	AW112010	6.71846e-10	0.524533	0.919	0.871	1.08557e-05	expressed sequence AW112010 [Source:MGI Symbol;Acc:MGI:2147706]
1	Psenen	6.84387e-10	0.3571	0.631	0.446	1.10583e-05	presenilin enhancer gamma secretase subunit [Source:MGI Symbol;Acc:MGI:1913590]
1	Hsph1	8.04587e-10	-0.393648	0.146	0.373	1.30005e-05	heat shock 105kDa/110kDa protein 1 [Source:MGI Symbol;Acc:MGI:105053]
1	Gabarapl2	8.18912e-10	0.36745	0.507	0.306	1.3232e-05	gamma-aminobutyric acid (GABA) A receptor-associated protein-like 2 [Source:MGI Symbol;Acc:MGI:1890602]
1	Chchd2	9.37831e-10	0.360146	0.799	0.718	1.51535e-05	coiled-coil-helix-coiled-coil-helix domain containing 2 [Source:MGI Symbol;Acc:MGI:1261428]
1	Ubl5	1.08189e-09	0.365828	0.748	0.623	1.74812e-05	ubiquitin-like 5 [Source:MGI Symbol;Acc:MGI:1913427]
1	Ndufb11	1.29788e-09	0.352936	0.577	0.419	2.09711e-05	NADH:ubiquinone oxidoreductase subunit B11 [Source:MGI Symbol;Acc:MGI:1349919]
1	Psme1	1.36357e-09	0.414393	0.805	0.71	2.20326e-05	proteasome (prosome, macropain) activator subunit 1 (PA28 alpha) [Source:MGI Symbol;Acc:MGI:1096367]
1	Calm1	1.5459e-09	0.397736	0.886	0.805	2.49787e-05	calmodulin 1 [Source:MGI Symbol;Acc:MGI:88251]
1	Ybx1	1.62264e-09	0.379814	0.799	0.765	2.62186e-05	Y box protein 1 [Source:MGI Symbol;Acc:MGI:99146]
1	Dnaja1	1.65839e-09	-0.321416	0.729	0.832	2.67962e-05	DnaJ heat shock protein family (Hsp40) member A1 [Source:MGI Symbol;Acc:MGI:1270129]
1	Jund	1.71852e-09	0.432072	0.881	0.803	2.77678e-05	jun D proto-oncogene [Source:MGI Symbol;Acc:MGI:96648]
1	Itgal	2.06507e-09	-0.296245	0.745	0.84	3.33674e-05	integrin alpha L [Source:MGI Symbol;Acc:MGI:96606]
1	Rpl4	2.25687e-09	0.358208	0.93	0.893	3.64665e-05	ribosomal protein L4 [Source:MGI Symbol;Acc:MGI:1915141]
1	Cd2	2.32215e-09	0.402793	0.881	0.763	3.75213e-05	CD2 antigen [Source:MGI Symbol;Acc:MGI:88320]
1	S100a6	2.5087e-09	0.630116	0.553	0.386	4.05356e-05	S100 calcium binding protein A6 (calcyclin) [Source:MGI Symbol;Acc:MGI:1339467]
1	Rplp2	2.69244e-09	0.302957	0.989	0.996	4.35045e-05	ribosomal protein, large P2 [Source:MGI Symbol;Acc:MGI:1914436]
1	Pnrc1	3.11892e-09	0.350381	0.745	0.608	5.03955e-05	proline-rich nuclear receptor coactivator 1 [Source:MGI Symbol;Acc:MGI:1917838]
1	Ndufb7	3.21623e-09	0.362418	0.596	0.457	5.19678e-05	NADH:ubiquinone oxidoreductase subunit B7 [Source:MGI Symbol;Acc:MGI:1914166]
1	Npm1	3.39151e-09	0.33848	0.881	0.796	5.48001e-05	nucleophosmin 1 [Source:MGI Symbol;Acc:MGI:106184]
1	Atp5md	3.58413e-09	0.350509	0.531	0.373	5.79124e-05	ATP synthase membrane subunit DAPIT [Source:MGI Symbol;Acc:MGI:1891435]
1	Taf10	3.77667e-09	0.336025	0.561	0.392	6.10234e-05	TATA-box binding protein associated factor 10 [Source:MGI Symbol;Acc:MGI:1346320]
1	Smdt1	4.033e-09	0.373248	0.537	0.361	6.51653e-05	single-pass membrane protein with aspartate rich tail 1 [Source:MGI Symbol;Acc:MGI:1916279]
1	Atp6v0e	5.26802e-09	0.334563	0.588	0.421	8.51207e-05	ATPase, H+ transporting, lysosomal V0 subunit E [Source:MGI Symbol;Acc:MGI:1328318]
1	Arpc1b	6.99878e-09	0.371551	0.764	0.694	0.000113086	actin related protein 2/3 complex, subunit 1B [Source:MGI Symbol;Acc:MGI:1343142]
1	Rpl31	7.84969e-09	0.314932	0.892	0.811	0.000126835	ribosomal protein L31 [Source:MGI Symbol;Acc:MGI:2149632]
1	Selenof	1.06255e-08	0.329953	0.509	0.302	0.000171687	selenoprotein F [Source:MGI Symbol;Acc:MGI:1927947]
1	mt-Nd4	1.15689e-08	-0.150135	0.997	0.998	0.000186931	mitochondrially encoded NADH dehydrogenase 4 [Source:MGI Symbol;Acc:MGI:102498]
1	Ndfip1	1.17598e-08	0.389348	0.87	0.749	0.000190015	Nedd4 family interacting protein 1 [Source:MGI Symbol;Acc:MGI:1929601]
1	Camp	1.23665e-08	-0.306643	0.276	0.474	0.000199818	cathelicidin antimicrobial peptide [Source:MGI Symbol;Acc:MGI:108443]
1	Ubc	1.26469e-08	0.340992	0.745	0.628	0.000204349	ubiquitin C [Source:MGI Symbol;Acc:MGI:98889]
1	Prdx1	1.29119e-08	0.333998	0.672	0.505	0.00020863	peroxiredoxin 1 [Source:MGI Symbol;Acc:MGI:99523]
1	Myl12a	1.29991e-08	0.343651	0.61	0.459	0.000210039	myosin, light chain 12A, regulatory, non-sarcomeric [Source:MGI Symbol;Acc:MGI:1914518]
1	Tspan32	1.39064e-08	0.341566	0.778	0.654	0.0002247	tetraspanin 32 [Source:MGI Symbol;Acc:MGI:1350360]
1	Cst3	1.44778e-08	0.32726	0.585	0.364	0.000233933	cystatin C [Source:MGI Symbol;Acc:MGI:102519]
1	Micos13	1.59457e-08	0.348544	0.466	0.29	0.000257651	mitochondrial contact site and cristae organizing system subunit 13 [Source:MGI Symbol;Acc:MGI:2442174]
1	Dnajc8	1.62599e-08	0.324134	0.566	0.412	0.000262728	DnaJ heat shock protein family (Hsp40) member C8 [Source:MGI Symbol;Acc:MGI:1915848]
1	S100a4	1.77535e-08	0.662844	0.35	0.202	0.000286862	S100 calcium binding protein A4 [Source:MGI Symbol;Acc:MGI:1330282]
1	Arglu1	1.7904e-08	0.33181	0.715	0.581	0.000289292	arginine and glutamate rich 1 [Source:MGI Symbol;Acc:MGI:2442985]
1	Ndufb9	1.88541e-08	0.317979	0.634	0.45	0.000304644	NADH:ubiquinone oxidoreductase subunit B9 [Source:MGI Symbol;Acc:MGI:1913468]
1	Eif5a	2.08575e-08	0.33905	0.653	0.537	0.000337015	eukaryotic translation initiation factor 5A [Source:MGI Symbol;Acc:MGI:106248]
1	Podnl1	2.16018e-08	0.347084	0.477	0.29	0.000349042	podocan-like 1 [Source:MGI Symbol;Acc:MGI:2685352]
1	Krtcap2	2.33747e-08	0.332859	0.496	0.304	0.000377689	keratinocyte associated protein 2 [Source:MGI Symbol;Acc:MGI:1913309]
1	Shisa5	2.65024e-08	0.318471	0.992	0.984	0.000428225	shisa family member 5 [Source:MGI Symbol;Acc:MGI:1915044]
1	Scand1	2.94832e-08	0.317186	0.604	0.466	0.00047639	SCAN domain-containing 1 [Source:MGI Symbol;Acc:MGI:1343132]
1	Eif3i	2.96708e-08	0.332005	0.463	0.301	0.000479421	eukaryotic translation initiation factor 3, subunit I [Source:MGI Symbol;Acc:MGI:1860763]
1	Arpc2	3.06902e-08	0.336837	0.889	0.794	0.000495892	actin related protein 2/3 complex, subunit 2 [Source:MGI Symbol;Acc:MGI:1923959]
1	Psma7	3.66384e-08	0.323168	0.645	0.486	0.000592003	proteasome subunit alpha 7 [Source:MGI Symbol;Acc:MGI:1347070]
1	Ndufa4	3.74094e-08	0.340894	0.748	0.623	0.000604462	Ndufa4, mitochondrial complex associated [Source:MGI Symbol;Acc:MGI:107686]
1	Gstp3	3.93282e-08	0.362733	0.398	0.251	0.000635465	glutathione S-transferase pi 3 [Source:MGI Symbol;Acc:MGI:2385078]
1	Lsm4	3.96802e-08	0.321058	0.547	0.35	0.000641153	LSM4 homolog, U6 small nuclear RNA and mRNA degradation associated [Source:MGI Symbol;Acc:MGI:1354692]
1	H2-K1	4.07149e-08	0.314636	1	1	0.000657871	histocompatibility 2, K1, K region [Source:MGI Symbol;Acc:MGI:95904]
1	Sap18	4.61001e-08	0.373394	0.393	0.184	0.000744886	Sin3-associated polypeptide 18 [Source:MGI Symbol;Acc:MGI:1277978]
1	D8Ertd738e	4.69759e-08	0.320382	0.518	0.348	0.000759037	DNA segment, Chr 8, ERATO Doi 738, expressed [Source:MGI Symbol;Acc:MGI:1289231]
1	Cdk2ap2	5.05484e-08	0.349768	0.794	0.694	0.000816761	CDK2-associated protein 2 [Source:MGI Symbol;Acc:MGI:1098779]
1	Ndufb1-ps	6.07969e-08	0.351259	0.637	0.514	0.000982357	NA
1	Tmem59	6.34066e-08	0.297993	0.591	0.412	0.00102452	transmembrane protein 59 [Source:MGI Symbol;Acc:MGI:1929278]
1	Gnai2	6.51161e-08	0.324777	0.864	0.794	0.00105215	guanine nucleotide binding protein (G protein), alpha inhibiting 2 [Source:MGI Symbol;Acc:MGI:95772]
1	Drap1	7.06339e-08	0.304412	0.537	0.342	0.0011413	Dr1 associated protein 1 (negative cofactor 2 alpha) [Source:MGI Symbol;Acc:MGI:1913806]
1	Gabarap	7.92281e-08	0.313629	0.743	0.632	0.00128017	gamma-aminobutyric acid receptor associated protein [Source:MGI Symbol;Acc:MGI:1861742]
1	Psmb5	8.46862e-08	0.313623	0.482	0.286	0.00136836	proteasome (prosome, macropain) subunit, beta type 5 [Source:MGI Symbol;Acc:MGI:1194513]
1	Ubxn1	8.85169e-08	0.306317	0.547	0.366	0.00143026	UBX domain protein 1 [Source:MGI Symbol;Acc:MGI:1289301]
1	Rer1	8.96448e-08	0.317611	0.463	0.271	0.00144848	retention in endoplasmic reticulum sorting receptor 1 [Source:MGI Symbol;Acc:MGI:1915080]
1	Calm2	8.98601e-08	0.341455	0.661	0.552	0.00145196	calmodulin 2 [Source:MGI Symbol;Acc:MGI:103250]
1	Ndufa1	9.62192e-08	0.32736	0.569	0.415	0.00155471	NADH:ubiquinone oxidoreductase subunit A1 [Source:MGI Symbol;Acc:MGI:1929511]
1	Cd19	9.83389e-08	-0.364658	0.111	0.335	0.00158896	CD19 antigen [Source:MGI Symbol;Acc:MGI:88319]
1	Ncl	1.00062e-07	0.319054	0.875	0.812	0.00161681	nucleolin [Source:MGI Symbol;Acc:MGI:97286]
1	Chmp2a	1.12261e-07	0.323114	0.507	0.386	0.00181391	charged multivesicular body protein 2A [Source:MGI Symbol;Acc:MGI:1916203]
1	Bnip3l	1.13727e-07	0.298969	0.504	0.353	0.0018376	BCL2/adenovirus E1B interacting protein 3-like [Source:MGI Symbol;Acc:MGI:1332659]
1	Sat1	1.17829e-07	0.298592	0.509	0.344	0.00190387	spermidine/spermine N1-acetyl transferase 1 [Source:MGI Symbol;Acc:MGI:98233]
1	Ly6e	1.20795e-07	0.337278	0.986	0.953	0.0019518	lymphocyte antigen 6 complex, locus E [Source:MGI Symbol;Acc:MGI:106651]
1	Etfb	1.31311e-07	0.366572	0.39	0.199	0.00212173	electron transferring flavoprotein, beta polypeptide [Source:MGI Symbol;Acc:MGI:106098]
1	Tln1	1.5559e-07	0.313542	0.743	0.659	0.00251402	talin 1 [Source:MGI Symbol;Acc:MGI:1099832]
1	Sec62	1.55998e-07	0.322091	0.694	0.554	0.00252062	SEC62 homolog (S. cerevisiae) [Source:MGI Symbol;Acc:MGI:1916526]
1	Hint1	1.68634e-07	0.313522	0.678	0.519	0.00272479	histidine triad nucleotide binding protein 1 [Source:MGI Symbol;Acc:MGI:1321133]
1	Psme2	1.81583e-07	0.364221	0.669	0.532	0.00293401	proteasome (prosome, macropain) activator subunit 2 (PA28 beta) [Source:MGI Symbol;Acc:MGI:1096365]
1	Ldha	1.86476e-07	0.359338	0.626	0.546	0.00301307	lactate dehydrogenase A [Source:MGI Symbol;Acc:MGI:96759]
1	Gmfg	1.90143e-07	0.349741	0.688	0.554	0.00307233	glia maturation factor, gamma [Source:MGI Symbol;Acc:MGI:1927135]
1	Psmb3	1.91147e-07	0.298811	0.542	0.388	0.00308855	proteasome (prosome, macropain) subunit, beta type 3 [Source:MGI Symbol;Acc:MGI:1347014]
1	Fyb	1.94883e-07	0.328657	0.9	0.82	0.00314892	FYN binding protein [Source:MGI Symbol;Acc:MGI:1346327]
1	Ndufa2	2.01771e-07	0.309886	0.68	0.559	0.00326022	NADH:ubiquinone oxidoreductase subunit A2 [Source:MGI Symbol;Acc:MGI:1343103]
1	Hspa8	2.18655e-07	-0.238763	0.935	0.953	0.00353303	heat shock protein 8 [Source:MGI Symbol;Acc:MGI:105384]
1	Tnfrsf18	2.39842e-07	0.390354	0.688	0.561	0.00387537	tumor necrosis factor receptor superfamily, member 18 [Source:MGI Symbol;Acc:MGI:894675]
1	mt-Co2	2.4616e-07	-0.0718632	1	1	0.00397745	mitochondrially encoded cytochrome c oxidase II [Source:MGI Symbol;Acc:MGI:102503]
1	Nedd8	2.50717e-07	0.298746	0.564	0.432	0.00405108	neural precursor cell expressed, developmentally down-regulated gene 8 [Source:MGI Symbol;Acc:MGI:97301]
1	Bcl2a1d	2.65352e-07	0.361995	0.407	0.235	0.00428755	B cell leukemia/lymphoma 2 related protein A1d [Source:MGI Symbol;Acc:MGI:1278325]
1	Tomm7	2.66131e-07	0.301456	0.724	0.605	0.00430015	translocase of outer mitochondrial membrane 7 [Source:MGI Symbol;Acc:MGI:1913419]
1	Rabac1	3.36598e-07	0.299828	0.702	0.557	0.00543875	Rab acceptor 1 (prenylated) [Source:MGI Symbol;Acc:MGI:1201692]
1	Nt5c	3.45632e-07	0.30859	0.442	0.284	0.00558472	5',3'-nucleotidase, cytosolic [Source:MGI Symbol;Acc:MGI:1354954]
1	H2-T23	3.45812e-07	0.319011	0.87	0.758	0.00558762	histocompatibility 2, T region locus 23 [Source:MGI Symbol;Acc:MGI:95957]
1	Tma7	3.51051e-07	0.305975	0.797	0.727	0.00567229	translational machinery associated 7 [Source:MGI Symbol;Acc:MGI:1913417]
1	Ccdc12	3.99716e-07	0.291631	0.507	0.328	0.00645861	coiled-coil domain containing 12 [Source:MGI Symbol;Acc:MGI:1919904]
1	Ppp1r14b	4.16244e-07	0.451965	0.469	0.297	0.00672567	protein phosphatase 1, regulatory inhibitor subunit 14B [Source:MGI Symbol;Acc:MGI:107682]
1	Cd82	4.71815e-07	0.342293	0.805	0.683	0.00762358	CD82 antigen [Source:MGI Symbol;Acc:MGI:104651]
1	Tmed9	5.22254e-07	0.299602	0.564	0.375	0.00843858	transmembrane p24 trafficking protein 9 [Source:MGI Symbol;Acc:MGI:1914761]
1	Ndufa5	5.25748e-07	0.303847	0.472	0.259	0.00849503	NADH:ubiquinone oxidoreductase subunit A5 [Source:MGI Symbol;Acc:MGI:1915452]
1	Srrm2	5.2623e-07	0.302637	0.949	0.905	0.00850282	serine/arginine repetitive matrix 2 [Source:MGI Symbol;Acc:MGI:1923206]
1	Ms4a6b	6.02744e-07	0.373992	0.77	0.679	0.00973914	membrane-spanning 4-domains, subfamily A, member 6B [Source:MGI Symbol;Acc:MGI:1917024]
1	Cyb5a	6.67902e-07	0.30975	0.415	0.255	0.010792	cytochrome b5 type A (microsomal) [Source:MGI Symbol;Acc:MGI:1926952]
1	Gm12840	7.30169e-07	0.652125	0.257	0.14	0.0117981	predicted gene 12840 [Source:MGI Symbol;Acc:MGI:3650917]
1	H2afz	7.3379e-07	0.429355	0.846	0.789	0.0118566	NA
1	Arf5	7.45883e-07	0.292557	0.748	0.656	0.012052	ADP-ribosylation factor 5 [Source:MGI Symbol;Acc:MGI:99434]
1	Hnrnpa1	7.8488e-07	0.276664	0.642	0.499	0.0126821	heterogeneous nuclear ribonucleoprotein A1 [Source:MGI Symbol;Acc:MGI:104820]
1	Syf2	8.14208e-07	0.281723	0.482	0.37	0.013156	SYF2 homolog, RNA splicing factor (S. cerevisiae) [Source:MGI Symbol;Acc:MGI:1915842]
1	Chmp4b	8.15419e-07	0.284768	0.575	0.428	0.0131755	charged multivesicular body protein 4B [Source:MGI Symbol;Acc:MGI:1922858]
1	Txndc17	8.25334e-07	0.306555	0.436	0.25	0.0133357	thioredoxin domain containing 17 [Source:MGI Symbol;Acc:MGI:1289248]
1	Odc1	8.61781e-07	0.378538	0.428	0.284	0.0139247	ornithine decarboxylase, structural 1 [Source:MGI Symbol;Acc:MGI:97402]
1	Stip1	9.75778e-07	-0.292077	0.179	0.353	0.0157666	stress-induced phosphoprotein 1 [Source:MGI Symbol;Acc:MGI:109130]
1	Polr2e	1.0099e-06	0.292004	0.453	0.324	0.016318	polymerase (RNA) II (DNA directed) polypeptide E [Source:MGI Symbol;Acc:MGI:1913670]
1	Capns1	1.02274e-06	0.282267	0.572	0.472	0.0165254	calpain, small subunit 1 [Source:MGI Symbol;Acc:MGI:88266]
1	Smco4	1.06151e-06	0.315484	0.569	0.424	0.0171518	single-pass membrane protein with coiled-coil domains 4 [Source:MGI Symbol;Acc:MGI:3039636]
1	Hnrnph1	1.08203e-06	-0.258231	0.553	0.703	0.0174834	heterogeneous nuclear ribonucleoprotein H1 [Source:MGI Symbol;Acc:MGI:1891925]
1	Plgrkt	1.08253e-06	0.285527	0.453	0.342	0.0174914	plasminogen receptor, C-terminal lysine transmembrane protein [Source:MGI Symbol;Acc:MGI:1915009]
1	Arhgdib	1.13428e-06	0.297045	0.892	0.849	0.0183278	Rho, GDP dissociation inhibitor (GDI) beta [Source:MGI Symbol;Acc:MGI:101940]
1	Prdx5	1.21324e-06	0.290733	0.45	0.29	0.0196036	peroxiredoxin 5 [Source:MGI Symbol;Acc:MGI:1859821]
1	Snrpe	1.25268e-06	0.297281	0.71	0.576	0.0202408	small nuclear ribonucleoprotein E [Source:MGI Symbol;Acc:MGI:98346]
1	Arpp19	1.31069e-06	0.270565	0.55	0.401	0.0211782	cAMP-regulated phosphoprotein 19 [Source:MGI Symbol;Acc:MGI:1891691]
1	Sub1	1.34622e-06	0.299069	0.688	0.588	0.0217523	SUB1 homolog, transcriptional regulator [Source:MGI Symbol;Acc:MGI:104811]
1	Smap1	1.37462e-06	0.302424	0.618	0.49	0.0222111	small ArfGAP 1 [Source:MGI Symbol;Acc:MGI:2138261]
1	Eif4a2	1.38077e-06	-0.245431	0.58	0.681	0.0223104	eukaryotic translation initiation factor 4A2 [Source:MGI Symbol;Acc:MGI:106906]
1	Psmb6	1.45161e-06	0.302376	0.415	0.25	0.0234552	proteasome (prosome, macropain) subunit, beta type 6 [Source:MGI Symbol;Acc:MGI:104880]
1	Trbc1	1.74291e-06	0.582552	0.656	0.561	0.028162	T cell receptor beta, constant region 1 [Source:MGI Symbol;Acc:MGI:4439726]
1	2010016I18Rik	1.89116e-06	0.328014	0.556	0.386	0.0305574	RIKEN cDNA 2010016I18 gene [Source:MGI Symbol;Acc:MGI:1916456]
1	Ccnd3	1.91407e-06	0.290672	0.65	0.539	0.0309276	cyclin D3 [Source:MGI Symbol;Acc:MGI:88315]
1	Fis1	1.95595e-06	0.271721	0.572	0.406	0.0316042	fission, mitochondrial 1 [Source:MGI Symbol;Acc:MGI:1913687]
1	H2-Q7	2.03633e-06	0.302412	0.954	0.945	0.0329031	histocompatibility 2, Q region locus 7 [Source:MGI Symbol;Acc:MGI:95936]
1	Sdhaf1	2.10236e-06	0.358632	0.341	0.184	0.0339699	succinate dehydrogenase complex assembly factor 1 [Source:MGI Symbol;Acc:MGI:1915582]
1	Mdh2	2.1826e-06	0.27651	0.491	0.352	0.0352664	malate dehydrogenase 2, NAD (mitochondrial) [Source:MGI Symbol;Acc:MGI:97050]
1	Nme1	2.29955e-06	0.297173	0.477	0.324	0.0371561	NME/NM23 nucleoside diphosphate kinase 1 [Source:MGI Symbol;Acc:MGI:97355]
1	Morf4l1	2.43876e-06	0.277967	0.827	0.738	0.0394055	mortality factor 4 like 1 [Source:MGI Symbol;Acc:MGI:1096551]
1	Atpif1	2.56938e-06	0.282116	0.501	0.324	0.0415161	ATPase inhibitory factor 1 [Source:MGI Symbol;Acc:MGI:1196457]
1	Ndufb5	2.83049e-06	0.264889	0.501	0.333	0.0457351	NADH:ubiquinone oxidoreductase subunit B5 [Source:MGI Symbol;Acc:MGI:1913296]
1	Hnrnpa3	3.01147e-06	0.297785	0.9	0.832	0.0486593	heterogeneous nuclear ribonucleoprotein A3 [Source:MGI Symbol;Acc:MGI:1917171]
1	Bsg	3.06785e-06	0.261369	0.485	0.337	0.0495703	basigin [Source:MGI Symbol;Acc:MGI:88208]
2	Hbb-bs	8.18304e-104	1.58226	0.772	0.074	1.32222e-99	hemoglobin, beta adult s chain [Source:MGI Symbol;Acc:MGI:5474852]
2	Ubb	1.85496e-91	1.29699	0.972	0.872	2.99725e-87	ubiquitin B [Source:MGI Symbol;Acc:MGI:98888]
2	Uba52	1.80478e-71	1.28554	0.932	0.814	2.91616e-67	ubiquitin A-52 residue ribosomal protein fusion product 1 [Source:MGI Symbol;Acc:MGI:98887]
2	Rpl11	4.80887e-63	0.977419	0.997	0.966	7.77017e-59	ribosomal protein L11 [Source:MGI Symbol;Acc:MGI:1914275]
2	Rps18	2.59339e-62	1.01245	0.994	0.976	4.1904e-58	ribosomal protein S18 [Source:MGI Symbol;Acc:MGI:98146]
2	Rpl34	2.72596e-61	0.963084	0.997	0.978	4.4046e-57	ribosomal protein L34 [Source:MGI Symbol;Acc:MGI:1915686]
2	Rpl10	4.4897e-60	1.0462	0.989	0.948	7.25446e-56	ribosomal protein L10 [Source:MGI Symbol;Acc:MGI:105943]
2	Rps15a	1.53213e-57	0.998241	0.994	0.98	2.47562e-53	ribosomal protein S15A [Source:MGI Symbol;Acc:MGI:2389091]
2	Rps11	2.39365e-57	0.948984	0.997	0.988	3.86766e-53	ribosomal protein S11 [Source:MGI Symbol;Acc:MGI:1351329]
2	Rpl9	2.67491e-55	0.88978	0.994	0.978	4.32212e-51	ribosomal protein L9 [Source:MGI Symbol;Acc:MGI:1298373]
2	Rps7	8.26581e-55	0.950652	0.992	0.978	1.33559e-50	ribosomal protein S7 [Source:MGI Symbol;Acc:MGI:1333818]
2	Rpl32	4.86275e-54	0.969243	0.994	0.984	7.85723e-50	ribosomal protein L32 [Source:MGI Symbol;Acc:MGI:98038]
2	Rpl21	5.06683e-53	0.869299	0.997	0.984	8.18698e-49	ribosomal protein L21 [Source:MGI Symbol;Acc:MGI:1278340]
2	Rps3	9.13139e-52	0.881042	0.997	0.962	1.47545e-47	ribosomal protein S3 [Source:MGI Symbol;Acc:MGI:1350917]
2	Rpl36	2.04673e-51	0.932706	0.994	0.96	3.30711e-47	ribosomal protein L36 [Source:MGI Symbol;Acc:MGI:1860603]
2	Rps10	1.16894e-48	0.838764	0.994	0.984	1.88878e-44	ribosomal protein S10 [Source:MGI Symbol;Acc:MGI:1914347]
2	Rpl15	6.42022e-46	0.93986	0.966	0.936	1.03738e-41	ribosomal protein L15 [Source:MGI Symbol;Acc:MGI:1913730]
2	Fau	3.44267e-45	0.805399	0.997	0.992	5.56266e-41	Finkel-Biskis-Reilly murine sarcoma virus (FBR-MuSV) ubiquitously expressed (fox derived) [Source:MGI Symbol;Acc:MGI:102547]
2	Rpl26	1.41129e-44	0.837081	0.994	0.97	2.28037e-40	ribosomal protein L26 [Source:MGI Symbol;Acc:MGI:106022]
2	Rps5	3.23892e-43	0.841913	0.989	0.972	5.23345e-39	ribosomal protein S5 [Source:MGI Symbol;Acc:MGI:1097682]
2	Rpl8	1.54211e-42	0.789236	0.992	0.984	2.49173e-38	ribosomal protein L8 [Source:MGI Symbol;Acc:MGI:1350927]
2	Rpl17	4.9515e-42	0.747399	0.997	0.988	8.00064e-38	ribosomal protein L17 [Source:MGI Symbol;Acc:MGI:2448270]
2	Tmsb10	1.4792e-41	0.914317	0.994	0.972	2.39008e-37	thymosin, beta 10 [Source:MGI Symbol;Acc:MGI:109146]
2	Hba-a2	6.34891e-41	1.14207	0.592	0.064	1.02586e-36	hemoglobin alpha, adult chain 2 [Source:MGI Symbol;Acc:MGI:96016]
2	Cd52	1.73935e-40	1.05497	0.983	0.92	2.81043e-36	CD52 antigen [Source:MGI Symbol;Acc:MGI:1346088]
2	Rpl19	2.77314e-40	0.73021	1	0.99	4.48084e-36	ribosomal protein L19 [Source:MGI Symbol;Acc:MGI:98020]
2	Rpl28	6.86736e-40	0.848169	0.994	0.948	1.10963e-35	ribosomal protein L28 [Source:MGI Symbol;Acc:MGI:101839]
2	Ppia	7.12462e-39	0.805475	0.983	0.946	1.1512e-34	peptidylprolyl isomerase A [Source:MGI Symbol;Acc:MGI:97749]
2	Rpl39	1.16346e-38	0.837533	0.994	0.986	1.87992e-34	ribosomal protein L39 [Source:MGI Symbol;Acc:MGI:1914498]
2	Rpl6	1.46476e-37	0.791467	0.992	0.962	2.36676e-33	ribosomal protein L6 [Source:MGI Symbol;Acc:MGI:108057]
2	Rplp0	1.96029e-37	0.931261	0.98	0.962	3.16743e-33	ribosomal protein, large, P0 [Source:MGI Symbol;Acc:MGI:1927636]
2	Rps27a	3.05281e-37	0.743191	0.997	0.988	4.93273e-33	ribosomal protein S27A [Source:MGI Symbol;Acc:MGI:1925544]
2	Rps4x	5.19704e-37	0.780678	0.98	0.984	8.39737e-33	ribosomal protein S4, X-linked [Source:MGI Symbol;Acc:MGI:98158]
2	Psmb8	7.3534e-37	0.867862	0.865	0.685	1.18816e-32	proteasome (prosome, macropain) subunit, beta type 8 (large multifunctional peptidase 7) [Source:MGI Symbol;Acc:MGI:1346527]
2	Rpl35	1.15328e-36	0.929629	0.983	0.928	1.86347e-32	ribosomal protein L35 [Source:MGI Symbol;Acc:MGI:1913739]
2	Rbm3	1.97578e-36	0.936205	0.868	0.747	3.19246e-32	RNA binding motif (RNP1, RRM) protein 3 [Source:MGI Symbol;Acc:MGI:1099460]
2	Rpl13	2.13626e-36	0.745206	1	1	3.45177e-32	ribosomal protein L13 [Source:MGI Symbol;Acc:MGI:105922]
2	Rps2	4.32615e-36	0.929174	0.977	0.944	6.9902e-32	ribosomal protein S2 [Source:MGI Symbol;Acc:MGI:105110]
2	Rpl18a	6.33145e-36	0.751163	0.992	0.98	1.02304e-31	ribosomal protein L18A [Source:MGI Symbol;Acc:MGI:1924058]
2	Rps13	7.07808e-36	0.735132	1	0.988	1.14368e-31	ribosomal protein S13 [Source:MGI Symbol;Acc:MGI:1915302]
2	Rps16	1.58061e-35	0.706522	0.994	0.996	2.55395e-31	ribosomal protein S16 [Source:MGI Symbol;Acc:MGI:98118]
2	Rpl14	1.91685e-35	0.800069	0.992	0.936	3.09724e-31	ribosomal protein L14 [Source:MGI Symbol;Acc:MGI:1914365]
2	Rpl24	2.4206e-35	0.818461	0.983	0.958	3.91121e-31	ribosomal protein L24 [Source:MGI Symbol;Acc:MGI:1915443]
2	Rpl27a	2.82762e-35	0.711778	0.994	0.994	4.56886e-31	ribosomal protein L27A [Source:MGI Symbol;Acc:MGI:1347076]
2	Tpt1	7.56589e-35	0.675607	0.994	0.994	1.2225e-30	tumor protein, translationally-controlled 1 [Source:MGI Symbol;Acc:MGI:104890]
2	Rpl18	5.73799e-34	0.7149	0.992	0.978	9.27145e-30	ribosomal protein L18 [Source:MGI Symbol;Acc:MGI:98003]
2	Rpl3	1.02988e-33	0.789011	0.98	0.95	1.66408e-29	ribosomal protein L3 [Source:MGI Symbol;Acc:MGI:1351605]
2	Ftl1	5.00648e-32	0.822008	0.87	0.772	8.08948e-28	ferritin light polypeptide 1 [Source:MGI Symbol;Acc:MGI:95589]
2	Rpl10a	1.70498e-31	0.782911	0.972	0.946	2.75491e-27	ribosomal protein L10A [Source:MGI Symbol;Acc:MGI:1343877]
2	H3f3b	5.9678e-31	0.728843	0.969	0.936	9.64277e-27	H3.3 histone B [Source:MGI Symbol;Acc:MGI:1101768]
2	Pfdn5	7.59139e-30	0.717974	0.918	0.776	1.22662e-25	prefoldin 5 [Source:MGI Symbol;Acc:MGI:1928753]
2	Rps21	9.10286e-30	0.640689	1	0.994	1.47084e-25	ribosomal protein S21 [Source:MGI Symbol;Acc:MGI:1913731]
2	Rps29	1.44908e-29	0.660083	1	0.994	2.34142e-25	ribosomal protein S29 [Source:MGI Symbol;Acc:MGI:107681]
2	H2-D1	2.35255e-29	0.618699	1	0.998	3.80126e-25	histocompatibility 2, D region locus 1 [Source:MGI Symbol;Acc:MGI:95896]
2	Rps27	2.72818e-29	0.653788	0.997	0.996	4.4082e-25	ribosomal protein S27 [Source:MGI Symbol;Acc:MGI:1888676]
2	Naca	4.53148e-29	0.770635	0.935	0.874	7.32196e-25	nascent polypeptide-associated complex alpha polypeptide [Source:MGI Symbol;Acc:MGI:106095]
2	Rps24	5.8563e-29	0.621048	1	0.998	9.4626e-25	ribosomal protein S24 [Source:MGI Symbol;Acc:MGI:98147]
2	Ppib	2.24091e-28	0.679132	0.808	0.577	3.62087e-24	peptidylprolyl isomerase B [Source:MGI Symbol;Acc:MGI:97750]
2	Rpl12	2.77475e-28	0.753109	0.98	0.98	4.48344e-24	ribosomal protein L12 [Source:MGI Symbol;Acc:MGI:98002]
2	Rpl30	3.96536e-28	0.635662	0.997	0.982	6.40723e-24	ribosomal protein L30 [Source:MGI Symbol;Acc:MGI:98037]
2	Rps23	4.04888e-28	0.611666	0.997	0.984	6.54218e-24	ribosomal protein S23 [Source:MGI Symbol;Acc:MGI:1913725]
2	Elob	1.6599e-27	0.709506	0.848	0.669	2.68207e-23	elongin B [Source:MGI Symbol;Acc:MGI:1914923]
2	Rpl37	6.0025e-27	0.664411	0.989	0.99	9.69885e-23	ribosomal protein L37 [Source:MGI Symbol;Acc:MGI:1914531]
2	H3f3a	2.1433e-26	0.637648	0.961	0.878	3.46315e-22	H3.3 histone A [Source:MGI Symbol;Acc:MGI:1097686]
2	mt-Co1	4.38353e-26	-0.144263	1	1	7.0829e-22	mitochondrially encoded cytochrome c oxidase I [Source:MGI Symbol;Acc:MGI:102504]
2	AY036118	4.55945e-26	0.821079	0.777	0.505	7.36717e-22	NA
2	Cd3d	8.70564e-26	0.633169	0.986	0.906	1.40666e-21	CD3 antigen, delta polypeptide [Source:MGI Symbol;Acc:MGI:88331]
2	Rpsa	1.27666e-25	0.624325	0.997	0.996	2.06283e-21	ribosomal protein SA [Source:MGI Symbol;Acc:MGI:105381]
2	Rpl38	6.69432e-25	0.595808	0.997	0.986	1.08167e-20	ribosomal protein L38 [Source:MGI Symbol;Acc:MGI:1914921]
2	Rpl22l1	7.47142e-25	0.770937	0.882	0.788	1.20723e-20	ribosomal protein L22 like 1 [Source:MGI Symbol;Acc:MGI:1915278]
2	Eef1a1	1.17288e-24	0.583521	0.997	0.992	1.89513e-20	eukaryotic translation elongation factor 1 alpha 1 [Source:MGI Symbol;Acc:MGI:1096881]
2	Ifi27l2a	3.64861e-24	0.989589	0.921	0.792	5.89542e-20	interferon, alpha-inducible protein 27 like 2A [Source:MGI Symbol;Acc:MGI:1924183]
2	Rpl23	6.04454e-24	0.589564	1	0.992	9.76676e-20	ribosomal protein L23 [Source:MGI Symbol;Acc:MGI:1929455]
2	Pfn1	7.51125e-24	0.689687	0.989	0.964	1.21367e-19	profilin 1 [Source:MGI Symbol;Acc:MGI:97549]
2	Gapdh	2.76594e-23	0.796389	0.927	0.85	4.46921e-19	glyceraldehyde-3-phosphate dehydrogenase [Source:MGI Symbol;Acc:MGI:95640]
2	Ptpn18	2.87186e-23	0.658102	0.901	0.756	4.64035e-19	protein tyrosine phosphatase, non-receptor type 18 [Source:MGI Symbol;Acc:MGI:108410]
2	Sec61g	8.01103e-23	0.656717	0.823	0.655	1.29442e-18	SEC61, gamma subunit [Source:MGI Symbol;Acc:MGI:1202066]
2	Rpl7	2.08769e-22	0.58495	0.992	0.964	3.37329e-18	ribosomal protein L7 [Source:MGI Symbol;Acc:MGI:98073]
2	Rps19	3.70824e-22	0.600583	0.992	0.99	5.99177e-18	ribosomal protein S19 [Source:MGI Symbol;Acc:MGI:1333780]
2	Nme2	1.47229e-21	0.807287	0.783	0.609	2.37893e-17	NME/NM23 nucleoside diphosphate kinase 2 [Source:MGI Symbol;Acc:MGI:97356]
2	Rps20	4.85395e-21	0.619309	0.997	0.992	7.84302e-17	ribosomal protein S20 [Source:MGI Symbol;Acc:MGI:1914677]
2	Cox8a	6.36195e-21	0.644294	0.854	0.731	1.02796e-16	cytochrome c oxidase subunit 8A [Source:MGI Symbol;Acc:MGI:105959]
2	Trbc2	9.41973e-21	0.723311	0.986	0.934	1.52204e-16	T cell receptor beta, constant 2 [Source:MGI Symbol;Acc:MGI:4835227]
2	Atp5j2	1.05745e-20	0.603696	0.837	0.665	1.70863e-16	ATP synthase, H+ transporting, mitochondrial F0 complex, subunit F2 [Source:MGI Symbol;Acc:MGI:1927558]
2	Hsph1	2.19439e-20	-0.554724	0.242	0.521	3.5457e-16	heat shock 105kDa/110kDa protein 1 [Source:MGI Symbol;Acc:MGI:105053]
2	mt-Co2	2.36998e-20	-0.114594	1	1	3.82942e-16	mitochondrially encoded cytochrome c oxidase II [Source:MGI Symbol;Acc:MGI:102503]
2	Rpl13a	2.74074e-20	0.538582	0.997	0.992	4.42849e-16	ribosomal protein L13A [Source:MGI Symbol;Acc:MGI:1351455]
2	Rps3a1	2.7781e-20	0.540637	1	0.994	4.48885e-16	ribosomal protein S3A1 [Source:MGI Symbol;Acc:MGI:1202063]
2	S100a8	5.70079e-20	-0.563703	0.572	0.81	9.21133e-16	S100 calcium binding protein A8 (calgranulin A) [Source:MGI Symbol;Acc:MGI:88244]
2	Rack1	5.94182e-20	0.599513	0.972	0.964	9.60079e-16	receptor for activated C kinase 1 [Source:MGI Symbol;Acc:MGI:101849]
2	Cd3g	1.30253e-19	0.595514	0.977	0.954	2.10463e-15	CD3 antigen, gamma polypeptide [Source:MGI Symbol;Acc:MGI:88333]
2	Eef1b2	2.98555e-19	0.614956	0.949	0.922	4.82406e-15	eukaryotic translation elongation factor 1 beta 2 [Source:MGI Symbol;Acc:MGI:1929520]
2	Rpl7a	3.91455e-19	0.573211	0.963	0.922	6.32512e-15	ribosomal protein L7A [Source:MGI Symbol;Acc:MGI:1353472]
2	Ptprcap	4.25309e-19	0.592013	0.958	0.892	6.87214e-15	protein tyrosine phosphatase, receptor type, C polypeptide-associated protein [Source:MGI Symbol;Acc:MGI:97811]
2	Ssr4	4.80834e-19	0.58738	0.654	0.419	7.76931e-15	signal sequence receptor, delta [Source:MGI Symbol;Acc:MGI:1099464]
2	Rps8	5.68722e-19	0.531988	0.994	0.992	9.18941e-15	ribosomal protein S8 [Source:MGI Symbol;Acc:MGI:98166]
2	Rps14	6.35403e-19	0.511611	0.997	0.99	1.02668e-14	ribosomal protein S14 [Source:MGI Symbol;Acc:MGI:98107]
2	Cyba	1.21421e-18	0.692763	0.837	0.697	1.96193e-14	cytochrome b-245, alpha polypeptide [Source:MGI Symbol;Acc:MGI:1316658]
2	Selenow	2.08292e-18	0.589465	0.837	0.647	3.36557e-14	selenoprotein W [Source:MGI Symbol;Acc:MGI:1100878]
2	Fth1	2.19155e-18	0.546395	0.966	0.93	3.54111e-14	ferritin heavy polypeptide 1 [Source:MGI Symbol;Acc:MGI:95588]
2	Sh3bgrl3	2.77348e-18	0.593919	0.907	0.822	4.48139e-14	SH3 domain binding glutamic acid-rich protein-like 3 [Source:MGI Symbol;Acc:MGI:1920973]
2	Oaz1	6.66969e-18	0.541194	0.941	0.916	1.07769e-13	ornithine decarboxylase antizyme 1 [Source:MGI Symbol;Acc:MGI:109433]
2	Rps25	7.53084e-18	0.550303	0.983	0.956	1.21683e-13	ribosomal protein S25 [Source:MGI Symbol;Acc:MGI:1922867]
2	Ndufa13	1.04549e-17	0.544289	0.839	0.681	1.6893e-13	NADH:ubiquinone oxidoreductase subunit A13 [Source:MGI Symbol;Acc:MGI:1914434]
2	Rpl27	1.35359e-17	0.551683	0.972	0.966	2.18714e-13	ribosomal protein L27 [Source:MGI Symbol;Acc:MGI:98036]
2	Dad1	2.71153e-17	0.545806	0.865	0.677	4.38129e-13	defender against cell death 1 [Source:MGI Symbol;Acc:MGI:101912]
2	Rplp1	2.79163e-17	0.522086	0.994	0.994	4.51071e-13	ribosomal protein, large, P1 [Source:MGI Symbol;Acc:MGI:1927099]
2	Emp3	4.3671e-17	0.604185	0.673	0.453	7.05637e-13	epithelial membrane protein 3 [Source:MGI Symbol;Acc:MGI:1098729]
2	Aldoa	5.57718e-17	0.64	0.817	0.699	9.01161e-13	aldolase A, fructose-bisphosphate [Source:MGI Symbol;Acc:MGI:87994]
2	S100a11	7.25964e-17	0.709143	0.887	0.762	1.17301e-12	S100 calcium binding protein A11 [Source:MGI Symbol;Acc:MGI:1338798]
2	Rpl36a	8.90615e-17	0.572471	0.966	0.908	1.43906e-12	ribosomal protein L36A [Source:MGI Symbol;Acc:MGI:1201789]
2	Rps28	1.20803e-16	0.570234	0.989	0.992	1.95193e-12	ribosomal protein S28 [Source:MGI Symbol;Acc:MGI:1859516]
2	Atp5g1	1.20809e-16	0.624444	0.685	0.495	1.95202e-12	ATP synthase, H+ transporting, mitochondrial F0 complex, subunit C1 (subunit 9) [Source:MGI Symbol;Acc:MGI:107653]
2	Clic1	3.96678e-16	0.538152	0.828	0.643	6.40952e-12	chloride intracellular channel 1 [Source:MGI Symbol;Acc:MGI:2148924]
2	Rpl22	4.40921e-16	0.51064	0.989	0.97	7.1244e-12	ribosomal protein L22 [Source:MGI Symbol;Acc:MGI:99262]
2	Camp	4.54333e-16	-0.457554	0.259	0.487	7.34111e-12	cathelicidin antimicrobial peptide [Source:MGI Symbol;Acc:MGI:108443]
2	Tspo	4.94258e-16	0.511552	0.724	0.515	7.98622e-12	translocator protein [Source:MGI Symbol;Acc:MGI:88222]
2	Rpl35a	6.09664e-16	0.475665	1	0.994	9.85096e-12	ribosomal protein L35A [Source:MGI Symbol;Acc:MGI:1928894]
2	Cox5b	7.45172e-16	0.555478	0.749	0.525	1.20405e-11	cytochrome c oxidase subunit 5B [Source:MGI Symbol;Acc:MGI:88475]
2	Atp5g2	8.7687e-16	0.563897	0.851	0.743	1.41685e-11	ATP synthase, H+ transporting, mitochondrial F0 complex, subunit C2 (subunit 9) [Source:MGI Symbol;Acc:MGI:1915192]
2	Atp5j	1.01122e-15	0.527588	0.794	0.639	1.63394e-11	ATP synthase, H+ transporting, mitochondrial F0 complex, subunit F [Source:MGI Symbol;Acc:MGI:107777]
2	Itm2b	1.38891e-15	0.585455	0.938	0.848	2.2442e-11	integral membrane protein 2B [Source:MGI Symbol;Acc:MGI:1309517]
2	Cox7b	1.46202e-15	0.580077	0.637	0.469	2.36233e-11	cytochrome c oxidase subunit 7B [Source:MGI Symbol;Acc:MGI:1913392]
2	H2-Q7	1.47041e-15	0.525759	0.977	0.898	2.37588e-11	histocompatibility 2, Q region locus 7 [Source:MGI Symbol;Acc:MGI:95936]
2	Sumo2	1.84875e-15	0.542527	0.814	0.685	2.98721e-11	small ubiquitin-like modifier 2 [Source:MGI Symbol;Acc:MGI:2158813]
2	Bcl2a1b	1.98963e-15	0.697061	0.73	0.529	3.21484e-11	B cell leukemia/lymphoma 2 related protein A1b [Source:MGI Symbol;Acc:MGI:1278326]
2	Eno1	2.41171e-15	0.542014	0.676	0.473	3.89685e-11	enolase 1, alpha non-neuron [Source:MGI Symbol;Acc:MGI:95393]
2	Cox6b1	5.17277e-15	0.493498	0.845	0.685	8.35816e-11	cytochrome c oxidase, subunit 6B1 [Source:MGI Symbol;Acc:MGI:107460]
2	H2afz	6.56497e-15	0.69296	0.901	0.838	1.06077e-10	NA
2	Rpl5	7.24312e-15	0.491787	0.977	0.98	1.17034e-10	ribosomal protein L5 [Source:MGI Symbol;Acc:MGI:102854]
2	Ighm	8.0257e-15	-0.474763	0.823	0.94	1.29679e-10	immunoglobulin heavy constant mu [Source:MGI Symbol;Acc:MGI:96448]
2	Eif1	8.96347e-15	0.503598	0.992	0.96	1.44832e-10	eukaryotic translation initiation factor 1 [Source:MGI Symbol;Acc:MGI:105125]
2	S100a9	1.01312e-14	-0.483775	0.634	0.818	1.63699e-10	S100 calcium binding protein A9 (calgranulin B) [Source:MGI Symbol;Acc:MGI:1338947]
2	Gm10076	1.04547e-14	0.59753	0.952	0.924	1.68927e-10	predicted gene 10076 [Source:MGI Symbol;Acc:MGI:3704451]
2	Edf1	1.41873e-14	0.491221	0.718	0.539	2.29238e-10	endothelial differentiation-related factor 1 [Source:MGI Symbol;Acc:MGI:1891227]
2	Rps6	1.90177e-14	0.524244	0.986	0.972	3.07288e-10	ribosomal protein S6 [Source:MGI Symbol;Acc:MGI:98159]
2	Eif3h	2.18025e-14	0.517053	0.769	0.631	3.52285e-10	eukaryotic translation initiation factor 3, subunit H [Source:MGI Symbol;Acc:MGI:1915385]
2	Igkc	2.24592e-14	-0.422813	0.941	0.98	3.62896e-10	immunoglobulin kappa constant [Source:MGI Symbol;Acc:MGI:96495]
2	Hbb-bt	3.55904e-14	0.728518	0.445	0.02	5.75069e-10	hemoglobin, beta adult t chain [Source:MGI Symbol;Acc:MGI:5474850]
2	Rnaset2a	3.59986e-14	0.512916	0.577	0.409	5.81665e-10	ribonuclease T2A [Source:MGI Symbol;Acc:MGI:1915445]
2	Atp5d	4.97271e-14	0.498388	0.727	0.555	8.0349e-10	ATP synthase, H+ transporting, mitochondrial F1 complex, delta subunit [Source:MGI Symbol;Acc:MGI:1913293]
2	Arpc3	5.09884e-14	0.496733	0.763	0.611	8.2387e-10	actin related protein 2/3 complex, subunit 3 [Source:MGI Symbol;Acc:MGI:1928375]
2	Rac2	8.12886e-14	0.504757	0.958	0.922	1.31346e-09	Rac family small GTPase 2 [Source:MGI Symbol;Acc:MGI:97846]
2	Ndufa7	8.63029e-14	0.476305	0.662	0.489	1.39448e-09	NADH:ubiquinone oxidoreductase subunit A7 [Source:MGI Symbol;Acc:MGI:1913666]
2	mt-Nd4	1.52081e-13	-0.144766	0.997	1	2.45732e-09	mitochondrially encoded NADH dehydrogenase 4 [Source:MGI Symbol;Acc:MGI:102498]
2	Psma2	1.60324e-13	0.4847	0.662	0.491	2.59051e-09	proteasome subunit alpha 2 [Source:MGI Symbol;Acc:MGI:104885]
2	Ifi27	1.95066e-13	0.479476	0.58	0.347	3.15187e-09	interferon, alpha-inducible protein 27 [Source:MGI Symbol;Acc:MGI:1277180]
2	Btf3	2.00225e-13	0.518231	0.913	0.84	3.23523e-09	basic transcription factor 3 [Source:MGI Symbol;Acc:MGI:1202875]
2	Hmgb1	2.67193e-13	0.503809	0.944	0.88	4.31731e-09	high mobility group box 1 [Source:MGI Symbol;Acc:MGI:96113]
2	Ngp	3.73646e-13	-0.432697	0.189	0.423	6.03737e-09	neutrophilic granule protein [Source:MGI Symbol;Acc:MGI:105983]
2	H2-Q4	3.74756e-13	0.486127	0.808	0.671	6.05531e-09	histocompatibility 2, Q region locus 4 [Source:MGI Symbol;Acc:MGI:95933]
2	Psma3	4.24584e-13	0.47018	0.775	0.601	6.86043e-09	proteasome subunit alpha 3 [Source:MGI Symbol;Acc:MGI:104883]
2	Psme1	5.81495e-13	0.52961	0.885	0.826	9.3958e-09	proteasome (prosome, macropain) activator subunit 1 (PA28 alpha) [Source:MGI Symbol;Acc:MGI:1096367]
2	Tmsb4x	6.81419e-13	0.498028	1	1	1.10104e-08	thymosin, beta 4, X chromosome [Source:MGI Symbol;Acc:MGI:99510]
2	S100a10	6.99162e-13	0.584945	0.913	0.812	1.12971e-08	S100 calcium binding protein A10 (calpactin) [Source:MGI Symbol;Acc:MGI:1339468]
2	Hsp90aa1	7.75108e-13	-0.384965	0.82	0.904	1.25242e-08	heat shock protein 90, alpha (cytosolic), class A member 1 [Source:MGI Symbol;Acc:MGI:96250]
2	Snrpd2	8.11409e-13	0.50628	0.696	0.507	1.31107e-08	small nuclear ribonucleoprotein D2 [Source:MGI Symbol;Acc:MGI:98345]
2	Gpx4	1.04622e-12	0.469944	0.685	0.483	1.69048e-08	glutathione peroxidase 4 [Source:MGI Symbol;Acc:MGI:104767]
2	Tnfrsf4	1.10345e-12	0.732303	0.817	0.605	1.78296e-08	tumor necrosis factor receptor superfamily, member 4 [Source:MGI Symbol;Acc:MGI:104512]
2	Ppp1r11	1.50723e-12	0.457828	0.569	0.357	2.43538e-08	protein phosphatase 1, regulatory inhibitor subunit 11 [Source:MGI Symbol;Acc:MGI:1923747]
2	Hnrnpa1	1.77613e-12	0.529596	0.755	0.633	2.86987e-08	heterogeneous nuclear ribonucleoprotein A1 [Source:MGI Symbol;Acc:MGI:104820]
2	Rpl29	1.83338e-12	0.542641	0.459	0.279	2.96237e-08	ribosomal protein L29 [Source:MGI Symbol;Acc:MGI:99687]
2	Son	2.14004e-12	0.419583	0.949	0.886	3.45788e-08	Son DNA binding protein [Source:MGI Symbol;Acc:MGI:98353]
2	Sri	2.43972e-12	0.469218	0.69	0.511	3.94211e-08	sorcin [Source:MGI Symbol;Acc:MGI:98419]
2	Scand1	2.48143e-12	0.470462	0.679	0.509	4.00949e-08	SCAN domain-containing 1 [Source:MGI Symbol;Acc:MGI:1343132]
2	Uqcrb	2.95963e-12	0.454695	0.676	0.473	4.78217e-08	ubiquinol-cytochrome c reductase binding protein [Source:MGI Symbol;Acc:MGI:1914780]
2	Rps26	2.98986e-12	0.542304	0.989	0.986	4.83102e-08	ribosomal protein S26 [Source:MGI Symbol;Acc:MGI:1351628]
2	Mrpl52	3.74544e-12	0.471814	0.851	0.758	6.05188e-08	mitochondrial ribosomal protein L52 [Source:MGI Symbol;Acc:MGI:1916086]
2	Supt4a	4.69628e-12	0.451119	0.62	0.445	7.58825e-08	SPT4A, DSIF elongation factor subunit [Source:MGI Symbol;Acc:MGI:107416]
2	Gm8369	5.49386e-12	0.509406	0.713	0.487	8.87698e-08	predicted gene 8369 [Source:MGI Symbol;Acc:MGI:3645380]
2	Cox7a2	6.53604e-12	0.45066	0.727	0.563	1.05609e-07	cytochrome c oxidase subunit 7A2 [Source:MGI Symbol;Acc:MGI:1316715]
2	Chmp2a	6.93328e-12	0.452567	0.617	0.471	1.12028e-07	charged multivesicular body protein 2A [Source:MGI Symbol;Acc:MGI:1916203]
2	Cox6c	7.52202e-12	0.476104	0.859	0.745	1.21541e-07	cytochrome c oxidase subunit 6C [Source:MGI Symbol;Acc:MGI:104614]
2	Rpl36al	1.07153e-11	0.527403	0.896	0.852	1.73137e-07	ribosomal protein L36A-like [Source:MGI Symbol;Acc:MGI:1913733]
2	Pkm	1.08e-11	0.487779	0.808	0.667	1.74506e-07	pyruvate kinase, muscle [Source:MGI Symbol;Acc:MGI:97591]
2	Cox7c	1.08544e-11	0.49598	0.893	0.844	1.75386e-07	cytochrome c oxidase subunit 7C [Source:MGI Symbol;Acc:MGI:103226]
2	Micos13	1.14115e-11	0.45508	0.555	0.379	1.84387e-07	mitochondrial contact site and cristae organizing system subunit 13 [Source:MGI Symbol;Acc:MGI:2442174]
2	Taf10	1.15747e-11	0.455938	0.696	0.545	1.87024e-07	TATA-box binding protein associated factor 10 [Source:MGI Symbol;Acc:MGI:1346320]
2	Hint1	1.45515e-11	0.481105	0.794	0.621	2.35124e-07	histidine triad nucleotide binding protein 1 [Source:MGI Symbol;Acc:MGI:1321133]
2	Mif	1.80732e-11	0.694784	0.713	0.573	2.92027e-07	macrophage migration inhibitory factor (glycosylation-inhibiting factor) [Source:MGI Symbol;Acc:MGI:96982]
2	Sdhaf1	1.89681e-11	0.495722	0.454	0.216	3.06487e-07	succinate dehydrogenase complex assembly factor 1 [Source:MGI Symbol;Acc:MGI:1915582]
2	Spcs2	2.33835e-11	0.430016	0.727	0.559	3.7783e-07	signal peptidase complex subunit 2 homolog (S. cerevisiae) [Source:MGI Symbol;Acc:MGI:1913874]
2	Cox4i1	2.39642e-11	0.434014	0.918	0.85	3.87213e-07	cytochrome c oxidase subunit 4I1 [Source:MGI Symbol;Acc:MGI:88473]
2	Bcl2a1d	2.97161e-11	0.517856	0.544	0.365	4.80154e-07	B cell leukemia/lymphoma 2 related protein A1d [Source:MGI Symbol;Acc:MGI:1278325]
2	Dnaja1	3.00562e-11	-0.303364	0.803	0.878	4.85648e-07	DnaJ heat shock protein family (Hsp40) member A1 [Source:MGI Symbol;Acc:MGI:1270129]
2	Cd2	3.48151e-11	0.505472	0.882	0.806	5.62542e-07	CD2 antigen [Source:MGI Symbol;Acc:MGI:88320]
2	Atp5l	3.96157e-11	0.459685	0.837	0.747	6.4011e-07	ATP synthase, H+ transporting, mitochondrial F0 complex, subunit G [Source:MGI Symbol;Acc:MGI:1351597]
2	Mat2a	5.78344e-11	-0.387238	0.561	0.695	9.34488e-07	methionine adenosyltransferase II, alpha [Source:MGI Symbol;Acc:MGI:2443731]
2	Tmem134	6.10254e-11	0.40764	0.634	0.461	9.86049e-07	transmembrane protein 134 [Source:MGI Symbol;Acc:MGI:1914240]
2	Cirbp	7.16055e-11	0.430099	0.493	0.291	1.157e-06	cold inducible RNA binding protein [Source:MGI Symbol;Acc:MGI:893588]
2	Snrpg	9.20599e-11	0.446396	0.868	0.764	1.4875e-06	small nuclear ribonucleoprotein polypeptide G [Source:MGI Symbol;Acc:MGI:1915261]
2	Eif3f	9.90085e-11	0.438677	0.828	0.749	1.59978e-06	eukaryotic translation initiation factor 3, subunit F [Source:MGI Symbol;Acc:MGI:1913335]
2	Gng5	1.06532e-10	0.429091	0.845	0.737	1.72134e-06	guanine nucleotide binding protein (G protein), gamma 5 [Source:MGI Symbol;Acc:MGI:109164]
2	Atp5h	1.23543e-10	0.461314	0.862	0.749	1.99621e-06	ATP synthase, H+ transporting, mitochondrial F0 complex, subunit D [Source:MGI Symbol;Acc:MGI:1918929]
2	Gabarap	1.82304e-10	0.413148	0.792	0.659	2.94566e-06	gamma-aminobutyric acid receptor associated protein [Source:MGI Symbol;Acc:MGI:1861742]
2	Psme2	2.483e-10	0.550914	0.797	0.707	4.01203e-06	proteasome (prosome, macropain) activator subunit 2 (PA28 beta) [Source:MGI Symbol;Acc:MGI:1096365]
2	Psmb1	2.58003e-10	0.423398	0.78	0.619	4.16881e-06	proteasome (prosome, macropain) subunit, beta type 1 [Source:MGI Symbol;Acc:MGI:104884]
2	Txn1	2.8025e-10	0.447115	0.735	0.563	4.52829e-06	thioredoxin 1 [Source:MGI Symbol;Acc:MGI:98874]
2	Abracl	3.01125e-10	0.461259	0.769	0.625	4.86558e-06	ABRA C-terminal like [Source:MGI Symbol;Acc:MGI:1920362]
2	Polr1d	3.03712e-10	0.430885	0.735	0.585	4.90738e-06	polymerase (RNA) I polypeptide D [Source:MGI Symbol;Acc:MGI:108403]
2	Trac	3.29785e-10	0.470427	0.966	0.886	5.32867e-06	T cell receptor alpha constant [Source:MGI Symbol;Acc:MGI:4439838]
2	Psmb10	4.15263e-10	0.41639	0.521	0.329	6.70982e-06	proteasome (prosome, macropain) subunit, beta type 10 [Source:MGI Symbol;Acc:MGI:1096380]
2	Limd2	4.28621e-10	0.446358	0.904	0.812	6.92566e-06	LIM domain containing 2 [Source:MGI Symbol;Acc:MGI:1915053]
2	Psmb2	6.27667e-10	0.418017	0.487	0.261	1.01418e-05	proteasome (prosome, macropain) subunit, beta type 2 [Source:MGI Symbol;Acc:MGI:1347045]
2	Eif3k	6.61837e-10	0.407805	0.744	0.581	1.0694e-05	eukaryotic translation initiation factor 3, subunit K [Source:MGI Symbol;Acc:MGI:1921080]
2	Chordc1	6.9581e-10	-0.302717	0.406	0.545	1.12429e-05	cysteine and histidine-rich domain (CHORD)-containing, zinc-binding protein 1 [Source:MGI Symbol;Acc:MGI:1914167]
2	Ndufb9	7.11845e-10	0.422352	0.648	0.513	1.1502e-05	NADH:ubiquinone oxidoreductase subunit B9 [Source:MGI Symbol;Acc:MGI:1913468]
2	Hopx	8.04086e-10	0.532662	0.408	0.234	1.29924e-05	HOP homeobox [Source:MGI Symbol;Acc:MGI:1916782]
2	Krtcap2	8.1258e-10	0.423228	0.566	0.381	1.31297e-05	keratinocyte associated protein 2 [Source:MGI Symbol;Acc:MGI:1913309]
2	Dnajb1	9.29638e-10	-0.367208	0.208	0.385	1.50211e-05	DnaJ heat shock protein family (Hsp40) member B1 [Source:MGI Symbol;Acc:MGI:1931874]
2	Eef1d	1.26876e-09	0.419876	0.758	0.593	2.05006e-05	eukaryotic translation elongation factor 1 delta (guanine nucleotide exchange protein) [Source:MGI Symbol;Acc:MGI:1913906]
2	H2-K1	1.40429e-09	0.365592	0.997	1	2.26906e-05	histocompatibility 2, K1, K region [Source:MGI Symbol;Acc:MGI:95904]
2	Actb	1.57919e-09	0.415281	1	1	2.55166e-05	actin, beta [Source:MGI Symbol;Acc:MGI:87904]
2	Ltb	1.6302e-09	0.497443	0.944	0.89	2.63408e-05	lymphotoxin B [Source:MGI Symbol;Acc:MGI:104796]
2	Park7	1.64243e-09	0.428485	0.651	0.471	2.65384e-05	Parkinson disease (autosomal recessive, early onset) 7 [Source:MGI Symbol;Acc:MGI:2135637]
2	Sec61b	1.85721e-09	0.416702	0.777	0.625	3.00088e-05	Sec61 beta subunit [Source:MGI Symbol;Acc:MGI:1913462]
2	Selenof	1.86212e-09	0.373831	0.6	0.385	3.00881e-05	selenoprotein F [Source:MGI Symbol;Acc:MGI:1927947]
2	Hnrnph1	1.95049e-09	-0.268563	0.682	0.79	3.1516e-05	heterogeneous nuclear ribonucleoprotein H1 [Source:MGI Symbol;Acc:MGI:1891925]
2	Wdr83os	2.17556e-09	0.393145	0.558	0.383	3.51527e-05	WD repeat domain 83 opposite strand [Source:MGI Symbol;Acc:MGI:3041257]
2	Atp5c1	2.41631e-09	0.429143	0.654	0.487	3.90428e-05	ATP synthase, H+ transporting, mitochondrial F1 complex, gamma polypeptide 1 [Source:MGI Symbol;Acc:MGI:1261437]
2	Tmed9	2.43082e-09	0.375017	0.645	0.447	3.92772e-05	transmembrane p24 trafficking protein 9 [Source:MGI Symbol;Acc:MGI:1914761]
2	Psma4	3.31471e-09	0.423646	0.603	0.481	5.35591e-05	proteasome subunit alpha 4 [Source:MGI Symbol;Acc:MGI:1347060]
2	Serf2	3.39785e-09	0.397025	0.932	0.87	5.49024e-05	small EDRK-rich factor 2 [Source:MGI Symbol;Acc:MGI:1337041]
2	Smap1	3.63171e-09	0.434336	0.659	0.487	5.86812e-05	small ArfGAP 1 [Source:MGI Symbol;Acc:MGI:2138261]
2	Atp5o	4.66237e-09	0.39858	0.586	0.425	7.53346e-05	ATP synthase, H+ transporting, mitochondrial F1 complex, O subunit [Source:MGI Symbol;Acc:MGI:106341]
2	Cfl1	4.97434e-09	0.439866	0.921	0.926	8.03753e-05	cofilin 1, non-muscle [Source:MGI Symbol;Acc:MGI:101757]
2	Atp5e	5.90208e-09	0.439317	0.899	0.854	9.53658e-05	ATP synthase, H+ transporting, mitochondrial F1 complex, epsilon subunit [Source:MGI Symbol;Acc:MGI:1855697]
2	Rpl4	5.91569e-09	0.403417	0.955	0.938	9.55858e-05	ribosomal protein L4 [Source:MGI Symbol;Acc:MGI:1915141]
2	Rbx1	6.47364e-09	0.39025	0.715	0.605	0.000104601	ring-box 1 [Source:MGI Symbol;Acc:MGI:1891829]
2	Ldha	6.58e-09	0.484984	0.806	0.707	0.00010632	lactate dehydrogenase A [Source:MGI Symbol;Acc:MGI:96759]
2	Rnaset2b	6.74395e-09	0.394332	0.527	0.341	0.000108969	ribonuclease T2B [Source:MGI Symbol;Acc:MGI:3702087]
2	Malat1	7.40979e-09	0.431329	1	1	0.000119727	metastasis associated lung adenocarcinoma transcript 1 (non-coding RNA) [Source:MGI Symbol;Acc:MGI:1919539]
2	Ndufa4	7.43189e-09	0.389368	0.831	0.743	0.000120084	Ndufa4, mitochondrial complex associated [Source:MGI Symbol;Acc:MGI:107686]
2	Coro1a	8.27137e-09	0.405235	0.98	0.962	0.000133649	coronin, actin binding protein 1A [Source:MGI Symbol;Acc:MGI:1345961]
2	Rnasek	9.11861e-09	0.381596	0.637	0.451	0.000147339	ribonuclease, RNase K [Source:MGI Symbol;Acc:MGI:106369]
2	Hcst	9.68972e-09	0.45933	0.797	0.689	0.000156567	hematopoietic cell signal transducer [Source:MGI Symbol;Acc:MGI:1344360]
2	Lgals1	1.00456e-08	0.590662	0.611	0.413	0.000162317	lectin, galactose binding, soluble 1 [Source:MGI Symbol;Acc:MGI:96777]
2	Cox5a	1.01695e-08	0.425266	0.682	0.551	0.000164319	cytochrome c oxidase subunit 5A [Source:MGI Symbol;Acc:MGI:88474]
2	2023-09-01	1.04047e-08	0.401304	0.696	0.559	0.00016812	NA
2	Rpl37a	1.15014e-08	0.357216	0.994	0.996	0.00018584	ribosomal protein L37a [Source:MGI Symbol;Acc:MGI:98068]
2	Hspa8	1.34972e-08	-0.199979	0.952	0.978	0.000218088	heat shock protein 8 [Source:MGI Symbol;Acc:MGI:105384]
2	Sub1	1.814e-08	0.408759	0.865	0.749	0.000293106	SUB1 homolog, transcriptional regulator [Source:MGI Symbol;Acc:MGI:104811]
2	Nfatc1	1.8783e-08	-0.301035	0.794	0.862	0.000303496	nuclear factor of activated T cells, cytoplasmic, calcineurin dependent 1 [Source:MGI Symbol;Acc:MGI:102469]
2	Tardbp	1.89324e-08	-0.281846	0.532	0.619	0.000305909	TAR DNA binding protein [Source:MGI Symbol;Acc:MGI:2387629]
2	Snrpe	1.9164e-08	0.410802	0.803	0.701	0.000309651	small nuclear ribonucleoprotein E [Source:MGI Symbol;Acc:MGI:98346]
2	Cd3e	1.91823e-08	0.379962	0.983	0.962	0.000309947	CD3 antigen, epsilon polypeptide [Source:MGI Symbol;Acc:MGI:88332]
2	Gm11808	1.96345e-08	0.433601	0.406	0.19	0.000317255	predicted gene 11808 [Source:MGI Symbol;Acc:MGI:3649356]
2	Prdx1	2.09667e-08	0.413218	0.763	0.627	0.00033878	peroxiredoxin 1 [Source:MGI Symbol;Acc:MGI:99523]
2	Ly6e	2.1427e-08	0.41533	0.949	0.922	0.000346218	lymphocyte antigen 6 complex, locus E [Source:MGI Symbol;Acc:MGI:106651]
2	Rps9	2.28571e-08	0.3537	1	0.994	0.000369325	ribosomal protein S9 [Source:MGI Symbol;Acc:MGI:1924096]
2	Clta	2.50519e-08	0.356881	0.676	0.537	0.000404789	clathrin, light polypeptide (Lca) [Source:MGI Symbol;Acc:MGI:894297]
2	Arhgdib	3.21609e-08	0.401575	0.913	0.898	0.000519656	Rho, GDP dissociation inhibitor (GDI) beta [Source:MGI Symbol;Acc:MGI:101940]
2	Crip1	3.62879e-08	0.526694	0.707	0.607	0.00058634	cysteine-rich protein 1 (intestinal) [Source:MGI Symbol;Acc:MGI:88501]
2	Ctss	3.65041e-08	0.382554	0.679	0.537	0.000589834	cathepsin S [Source:MGI Symbol;Acc:MGI:107341]
2	Pkp3	3.66484e-08	0.396261	0.608	0.407	0.000592164	plakophilin 3 [Source:MGI Symbol;Acc:MGI:1891830]
2	Mrpl33	3.94487e-08	0.359385	0.575	0.431	0.000637411	mitochondrial ribosomal protein L33 [Source:MGI Symbol;Acc:MGI:2137225]
2	Ndufb11	3.99054e-08	0.347533	0.634	0.459	0.000644791	NADH:ubiquinone oxidoreductase subunit B11 [Source:MGI Symbol;Acc:MGI:1349919]
2	Psmb9	4.12805e-08	0.374546	0.71	0.557	0.00066701	proteasome (prosome, macropain) subunit, beta type 9 (large multifunctional peptidase 2) [Source:MGI Symbol;Acc:MGI:1346526]
2	Taf1d	4.14641e-08	0.405451	0.499	0.319	0.000669976	TATA-box binding protein associated factor, RNA polymerase I, D [Source:MGI Symbol;Acc:MGI:1922566]
2	Prelid1	4.2628e-08	0.376255	0.699	0.503	0.000688783	PRELI domain containing 1 [Source:MGI Symbol;Acc:MGI:1913744]
2	Rpl41	4.30757e-08	0.378553	0.997	0.99	0.000696017	ribosomal protein L41 [Source:MGI Symbol;Acc:MGI:1915195]
2	Bax	4.52631e-08	0.355074	0.538	0.351	0.000731361	BCL2-associated X protein [Source:MGI Symbol;Acc:MGI:99702]
2	Gimap5	4.55646e-08	0.425229	0.738	0.625	0.000736233	GTPase, IMAP family member 5 [Source:MGI Symbol;Acc:MGI:2442232]
2	H2-T23	4.66543e-08	0.3892	0.879	0.8	0.000753839	histocompatibility 2, T region locus 23 [Source:MGI Symbol;Acc:MGI:95957]
2	Tle5	5.00708e-08	0.389311	0.761	0.681	0.000809044	TLE family member 5, transcriptional modulator [Source:MGI Symbol;Acc:MGI:95806]
2	Eef2	5.62962e-08	0.375793	0.952	0.896	0.000909635	eukaryotic translation elongation factor 2 [Source:MGI Symbol;Acc:MGI:95288]
2	Atp6v1f	5.70993e-08	0.358538	0.699	0.555	0.00092261	ATPase, H+ transporting, lysosomal V1 subunit F [Source:MGI Symbol;Acc:MGI:1913394]
2	Ndfip1	6.24045e-08	0.404633	0.93	0.856	0.00100833	Nedd4 family interacting protein 1 [Source:MGI Symbol;Acc:MGI:1929601]
2	Ndufb7	6.37351e-08	0.376948	0.727	0.565	0.00102983	NADH:ubiquinone oxidoreductase subunit B7 [Source:MGI Symbol;Acc:MGI:1914166]
2	Srgn	7.57393e-08	0.490886	0.983	0.952	0.0012238	serglycin [Source:MGI Symbol;Acc:MGI:97756]
2	Ndufa2	7.62253e-08	0.361979	0.758	0.625	0.00123165	NADH:ubiquinone oxidoreductase subunit A2 [Source:MGI Symbol;Acc:MGI:1343103]
2	Skap1	9.0924e-08	0.370598	0.766	0.647	0.00146915	src family associated phosphoprotein 1 [Source:MGI Symbol;Acc:MGI:1925723]
2	Psma7	9.47303e-08	0.412352	0.766	0.637	0.00153065	proteasome subunit alpha 7 [Source:MGI Symbol;Acc:MGI:1347070]
2	Sh2d1a	1.01952e-07	0.411577	0.496	0.325	0.00164734	SH2 domain containing 1A [Source:MGI Symbol;Acc:MGI:1328352]
2	Psmb5	1.19026e-07	0.352081	0.6	0.391	0.00192322	proteasome (prosome, macropain) subunit, beta type 5 [Source:MGI Symbol;Acc:MGI:1194513]
2	Gimap6	1.19415e-07	0.393817	0.786	0.691	0.0019295	GTPase, IMAP family member 6 [Source:MGI Symbol;Acc:MGI:1918876]
2	Ubxn1	1.48339e-07	0.341148	0.603	0.427	0.00239686	UBX domain protein 1 [Source:MGI Symbol;Acc:MGI:1289301]
2	Ost4	1.48347e-07	0.351136	0.676	0.549	0.00239699	oligosaccharyltransferase complex subunit 4 (non-catalytic) [Source:MGI Symbol;Acc:MGI:1914945]
2	Ndufv3	1.48442e-07	0.373499	0.546	0.405	0.00239852	NADH:ubiquinone oxidoreductase core subunit V3 [Source:MGI Symbol;Acc:MGI:1890894]
2	Erh	1.66838e-07	0.399854	0.456	0.305	0.00269578	ERH mRNA splicing and mitosis factor [Source:MGI Symbol;Acc:MGI:108089]
2	Nfkb1	1.68379e-07	-0.272393	0.797	0.838	0.00272067	nuclear factor of kappa light polypeptide gene enhancer in B cells 1, p105 [Source:MGI Symbol;Acc:MGI:97312]
2	Pycard	1.84838e-07	0.378306	0.513	0.395	0.00298661	PYD and CARD domain containing [Source:MGI Symbol;Acc:MGI:1931465]
2	Slc25a4	1.99576e-07	0.38461	0.468	0.337	0.00322474	solute carrier family 25 (mitochondrial carrier, adenine nucleotide translocator), member 4 [Source:MGI Symbol;Acc:MGI:1353495]
2	Uqcr10	2.13154e-07	0.410172	0.693	0.577	0.00344414	ubiquinol-cytochrome c reductase, complex III subunit X [Source:MGI Symbol;Acc:MGI:1913402]
2	Sdf4	2.15465e-07	0.472454	0.828	0.747	0.00348148	stromal cell derived factor 4 [Source:MGI Symbol;Acc:MGI:108079]
2	Rgs10	2.19752e-07	0.445136	0.499	0.339	0.00355075	regulator of G-protein signalling 10 [Source:MGI Symbol;Acc:MGI:1915115]
2	Tab2	2.23908e-07	-0.242117	0.499	0.621	0.00361791	TGF-beta activated kinase 1/MAP3K7 binding protein 2 [Source:MGI Symbol;Acc:MGI:1915902]
2	Mrps14	2.39802e-07	0.336536	0.507	0.339	0.00387472	mitochondrial ribosomal protein S14 [Source:MGI Symbol;Acc:MGI:1928141]
2	Gabarapl2	2.41776e-07	0.363075	0.521	0.351	0.00390662	gamma-aminobutyric acid (GABA) A receptor-associated protein-like 2 [Source:MGI Symbol;Acc:MGI:1890602]
2	Sod1	2.46447e-07	-0.237588	0.532	0.629	0.00398209	superoxide dismutase 1, soluble [Source:MGI Symbol;Acc:MGI:98351]
2	Tnfrsf18	2.49818e-07	0.436463	0.665	0.519	0.00403656	tumor necrosis factor receptor superfamily, member 18 [Source:MGI Symbol;Acc:MGI:894675]
2	Psenen	2.57627e-07	0.339883	0.71	0.555	0.00416274	presenilin enhancer gamma secretase subunit [Source:MGI Symbol;Acc:MGI:1913590]
2	Twsg1	2.6438e-07	-0.275396	0.369	0.485	0.00427186	twisted gastrulation BMP signaling modulator 1 [Source:MGI Symbol;Acc:MGI:2137520]
2	Psmb3	2.77828e-07	0.358112	0.637	0.493	0.00448914	proteasome (prosome, macropain) subunit, beta type 3 [Source:MGI Symbol;Acc:MGI:1347014]
2	Ndufa3	2.79959e-07	0.342631	0.727	0.585	0.00452357	NADH:ubiquinone oxidoreductase subunit A3 [Source:MGI Symbol;Acc:MGI:1913341]
2	Cops6	2.94119e-07	0.362264	0.454	0.303	0.00475237	COP9 signalosome subunit 6 [Source:MGI Symbol;Acc:MGI:1349439]
2	Dnajc8	2.97536e-07	0.359225	0.654	0.485	0.00480759	DnaJ heat shock protein family (Hsp40) member C8 [Source:MGI Symbol;Acc:MGI:1915848]
2	Rplp2	3.05901e-07	0.340197	0.994	0.998	0.00494274	ribosomal protein, large P2 [Source:MGI Symbol;Acc:MGI:1914436]
2	Mrpl23	3.38727e-07	0.357828	0.487	0.339	0.00547315	mitochondrial ribosomal protein L23 [Source:MGI Symbol;Acc:MGI:1196612]
2	Txndc17	3.50071e-07	0.356735	0.507	0.383	0.00565645	thioredoxin domain containing 17 [Source:MGI Symbol;Acc:MGI:1289248]
2	Ndufa11	3.55672e-07	0.347043	0.476	0.327	0.00574695	NADH:ubiquinone oxidoreductase subunit A11 [Source:MGI Symbol;Acc:MGI:1917125]
2	Arpp19	3.58957e-07	0.329632	0.665	0.505	0.00580003	cAMP-regulated phosphoprotein 19 [Source:MGI Symbol;Acc:MGI:1891691]
2	Srsf1	3.7929e-07	-0.23553	0.518	0.631	0.00612857	serine and arginine-rich splicing factor 1 [Source:MGI Symbol;Acc:MGI:98283]
2	Nedd8	3.93045e-07	0.342963	0.699	0.557	0.00635082	neural precursor cell expressed, developmentally down-regulated gene 8 [Source:MGI Symbol;Acc:MGI:97301]
2	Zfpm1	3.96191e-07	0.349987	0.476	0.287	0.00640165	zinc finger protein, multitype 1 [Source:MGI Symbol;Acc:MGI:1095400]
2	Ube2i	4.10969e-07	0.360344	0.687	0.523	0.00664043	ubiquitin-conjugating enzyme E2I [Source:MGI Symbol;Acc:MGI:107365]
2	Eif3i	4.12824e-07	0.35119	0.558	0.419	0.00667042	eukaryotic translation initiation factor 3, subunit I [Source:MGI Symbol;Acc:MGI:1860763]
2	Eif3m	4.28063e-07	0.355375	0.67	0.501	0.00691665	eukaryotic translation initiation factor 3, subunit M [Source:MGI Symbol;Acc:MGI:1351744]
2	Hnrnpd	4.35555e-07	0.382214	0.749	0.639	0.00703769	heterogeneous nuclear ribonucleoprotein D [Source:MGI Symbol;Acc:MGI:101947]
2	Calm1	4.89365e-07	0.37395	0.93	0.87	0.00790716	calmodulin 1 [Source:MGI Symbol;Acc:MGI:88251]
2	Shisa5	4.96249e-07	0.355201	0.983	0.976	0.00801839	shisa family member 5 [Source:MGI Symbol;Acc:MGI:1915044]
2	BE692007	5.47739e-07	0.450909	0.665	0.537	0.00885037	expressed sequence BE692007 [Source:MGI Symbol;Acc:MGI:3035348]
2	Rpl31	5.68591e-07	0.390345	0.921	0.874	0.00918729	ribosomal protein L31 [Source:MGI Symbol;Acc:MGI:2149632]
2	Trmt112	6.06627e-07	0.326927	0.561	0.413	0.00980188	tRNA methyltransferase 11-2 [Source:MGI Symbol;Acc:MGI:1914924]
2	Prdx5	6.11728e-07	0.327335	0.518	0.365	0.0098843	peroxiredoxin 5 [Source:MGI Symbol;Acc:MGI:1859821]
2	Gimap7	6.24863e-07	0.358665	0.515	0.369	0.0100965	GTPase, IMAP family member 7 [Source:MGI Symbol;Acc:MGI:1349657]
2	D8Ertd738e	7.76364e-07	0.316134	0.696	0.557	0.0125445	DNA segment, Chr 8, ERATO Doi 738, expressed [Source:MGI Symbol;Acc:MGI:1289231]
2	Rps17	8.69465e-07	0.383212	0.963	0.932	0.0140488	ribosomal protein S17 [Source:MGI Symbol;Acc:MGI:1309526]
2	Atp6v0c	8.84256e-07	0.33144	0.631	0.471	0.0142878	ATPase, H+ transporting, lysosomal V0 subunit C [Source:MGI Symbol;Acc:MGI:88116]
2	Ubl5	8.86245e-07	0.366093	0.755	0.717	0.0143199	ubiquitin-like 5 [Source:MGI Symbol;Acc:MGI:1913427]
2	Ndufb1-ps	8.88292e-07	0.370469	0.707	0.615	0.014353	NA
2	Vps28	8.93141e-07	0.321984	0.549	0.391	0.0144314	vacuolar protein sorting 28 [Source:MGI Symbol;Acc:MGI:1914164]
2	Pdcd10	9.00367e-07	0.329632	0.541	0.369	0.0145481	programmed cell death 10 [Source:MGI Symbol;Acc:MGI:1928396]
2	Fkbp3	9.05218e-07	0.372421	0.552	0.371	0.0146265	FK506 binding protein 3 [Source:MGI Symbol;Acc:MGI:1353460]
2	Nt5c	9.20318e-07	0.321068	0.569	0.385	0.0148705	5',3'-nucleotidase, cytosolic [Source:MGI Symbol;Acc:MGI:1354954]
2	Ptma	9.78329e-07	0.423672	0.975	0.952	0.0158078	prothymosin alpha [Source:MGI Symbol;Acc:MGI:97803]
2	Xrn2	9.85955e-07	0.340226	0.544	0.373	0.0159311	5'-3' exoribonuclease 2 [Source:MGI Symbol;Acc:MGI:894687]
2	Ccdc12	1.0427e-06	0.313704	0.586	0.401	0.0168479	coiled-coil domain containing 12 [Source:MGI Symbol;Acc:MGI:1919904]
2	Ndufa8	1.07671e-06	0.338255	0.445	0.279	0.0173975	NADH:ubiquinone oxidoreductase subunit A8 [Source:MGI Symbol;Acc:MGI:1915625]
2	Mrpl54	1.09966e-06	0.350415	0.445	0.242	0.0177683	mitochondrial ribosomal protein L54 [Source:MGI Symbol;Acc:MGI:1913297]
2	Ndufa12	1.13588e-06	0.369611	0.434	0.248	0.0183535	NADH:ubiquinone oxidoreductase subunit A12 [Source:MGI Symbol;Acc:MGI:1913664]
2	Myl6	1.16182e-06	0.366633	0.966	0.916	0.0187728	myosin, light polypeptide 6, alkali, smooth muscle and non-muscle [Source:MGI Symbol;Acc:MGI:109318]
2	Nol7	1.16391e-06	0.345184	0.724	0.613	0.0188064	nucleolar protein 7 [Source:MGI Symbol;Acc:MGI:1917328]
2	Gas5	1.21844e-06	0.407138	0.814	0.735	0.0196876	growth arrest specific 5 [Source:MGI Symbol;Acc:MGI:95659]
2	Slfn2	1.22653e-06	0.412926	0.915	0.846	0.0198182	schlafen 2 [Source:MGI Symbol;Acc:MGI:1313258]
2	Jchain	1.23138e-06	-0.27128	0.304	0.407	0.0198967	immunoglobulin joining chain [Source:MGI Symbol;Acc:MGI:96493]
2	Chrac1	1.23269e-06	0.385352	0.394	0.216	0.0199178	chromatin accessibility complex 1 [Source:MGI Symbol;Acc:MGI:2135796]
2	Ndufv2	1.29197e-06	0.330634	0.47	0.295	0.0208756	NADH:ubiquinone oxidoreductase core subunit V2 [Source:MGI Symbol;Acc:MGI:1920150]
2	Rps15	1.32169e-06	0.323634	0.986	0.988	0.0213559	ribosomal protein S15 [Source:MGI Symbol;Acc:MGI:98117]
2	Jund	1.41157e-06	0.420385	0.873	0.81	0.0228082	jun D proto-oncogene [Source:MGI Symbol;Acc:MGI:96648]
2	Celf1	1.51841e-06	-0.215914	0.49	0.627	0.0245344	CUGBP, Elav-like family member 1 [Source:MGI Symbol;Acc:MGI:1342295]
2	Eif3c	1.53791e-06	0.401751	0.738	0.637	0.0248496	eukaryotic translation initiation factor 3, subunit C [Source:MGI Symbol;Acc:MGI:1926966]
2	Morf4l1	1.6355e-06	0.33321	0.839	0.764	0.0264264	mortality factor 4 like 1 [Source:MGI Symbol;Acc:MGI:1096551]
2	Atox1	1.71712e-06	0.335857	0.53	0.369	0.0277453	antioxidant 1 copper chaperone [Source:MGI Symbol;Acc:MGI:1333855]
2	Ms4a4b	2.02793e-06	0.415367	0.893	0.846	0.0327674	membrane-spanning 4-domains, subfamily A, member 4B [Source:MGI Symbol;Acc:MGI:1913083]
2	Ube2l3	2.04418e-06	0.329556	0.594	0.451	0.0330299	ubiquitin-conjugating enzyme E2L 3 [Source:MGI Symbol;Acc:MGI:109240]
2	Hnrnpa3	2.13426e-06	0.36889	0.949	0.904	0.0344854	heterogeneous nuclear ribonucleoprotein A3 [Source:MGI Symbol;Acc:MGI:1917171]
2	Myl12b	2.16202e-06	0.339773	0.749	0.671	0.034934	myosin, light chain 12B, regulatory [Source:MGI Symbol;Acc:MGI:107494]
2	Slc5a3	2.29426e-06	-0.277049	0.217	0.365	0.0370706	solute carrier family 5 (inositol transporters), member 3 [Source:MGI Symbol;Acc:MGI:1858226]
2	Anp32a	2.36022e-06	0.336	0.749	0.659	0.0381364	acidic (leucine-rich) nuclear phosphoprotein 32 family, member A [Source:MGI Symbol;Acc:MGI:108447]
2	Rps12	2.41629e-06	0.372465	0.992	0.998	0.0390424	ribosomal protein S12 [Source:MGI Symbol;Acc:MGI:98105]
2	Lars2	2.56891e-06	0.3767	0.901	0.892	0.0415085	leucyl-tRNA synthetase, mitochondrial [Source:MGI Symbol;Acc:MGI:2142973]
2	Lsm4	2.58186e-06	0.340511	0.58	0.453	0.0417177	LSM4 homolog, U6 small nuclear RNA and mRNA degradation associated [Source:MGI Symbol;Acc:MGI:1354692]
2	Pnn	2.61227e-06	0.349932	0.662	0.527	0.042209	pinin [Source:MGI Symbol;Acc:MGI:1100514]
2	Dpm1	2.70629e-06	0.32157	0.456	0.242	0.0437282	dolichol-phosphate (beta-D) mannosyltransferase 1 [Source:MGI Symbol;Acc:MGI:1330239]
2	Eif6	2.73925e-06	0.367349	0.394	0.226	0.0442608	eukaryotic translation initiation factor 6 [Source:MGI Symbol;Acc:MGI:1196288]
2	Etfb	2.80995e-06	0.334251	0.448	0.275	0.0454031	electron transferring flavoprotein, beta polypeptide [Source:MGI Symbol;Acc:MGI:106098]
2	Tomm7	2.9109e-06	0.33446	0.803	0.735	0.0470343	translocase of outer mitochondrial membrane 7 [Source:MGI Symbol;Acc:MGI:1913419]
2	Gnai2	2.96099e-06	0.346614	0.885	0.84	0.0478438	guanine nucleotide binding protein (G protein), alpha inhibiting 2 [Source:MGI Symbol;Acc:MGI:95772]
2	Arpc1b	2.99727e-06	0.348343	0.839	0.8	0.0484299	actin related protein 2/3 complex, subunit 1B [Source:MGI Symbol;Acc:MGI:1343142]
2	Atp5k	3.0648e-06	0.358881	0.656	0.547	0.049521	ATP synthase, H+ transporting, mitochondrial F1F0 complex, subunit E [Source:MGI Symbol;Acc:MGI:106636]
2	Mettl23	3.07922e-06	0.311005	0.566	0.431	0.0497541	methyltransferase like 23 [Source:MGI Symbol;Acc:MGI:1921569]
3	Hbb-bs	3.02868e-48	1.28557	0.66	0.068	4.89374e-44	hemoglobin, beta adult s chain [Source:MGI Symbol;Acc:MGI:5474852]
3	Hba-a2	3.12268e-16	0.916749	0.467	0.042	5.04563e-12	hemoglobin alpha, adult chain 2 [Source:MGI Symbol;Acc:MGI:96016]
3	Hspa8	7.55195e-15	-0.311729	0.618	0.728	1.22024e-10	heat shock protein 8 [Source:MGI Symbol;Acc:MGI:105384]
3	Gm42418	3.6968e-14	-0.225776	0.997	1	5.97328e-10	NA
3	Ighm	4.66022e-14	-0.357927	0.802	0.902	7.52999e-10	immunoglobulin heavy constant mu [Source:MGI Symbol;Acc:MGI:96448]
3	Hsp90aa1	1.30307e-13	-0.353581	0.379	0.532	2.10551e-09	heat shock protein 90, alpha (cytosolic), class A member 1 [Source:MGI Symbol;Acc:MGI:96250]
3	Ngp	3.5596e-11	-0.308418	0.266	0.46	5.7516e-07	neutrophilic granule protein [Source:MGI Symbol;Acc:MGI:105983]
3	Hsp90ab1	1.23029e-10	-0.249711	0.71	0.792	1.9879e-06	heat shock protein 90 alpha (cytosolic), class B member 1 [Source:MGI Symbol;Acc:MGI:96247]
3	Dnaja1	1.23559e-09	-0.246589	0.411	0.512	1.99647e-05	DnaJ heat shock protein family (Hsp40) member A1 [Source:MGI Symbol;Acc:MGI:1270129]
3	S100a9	2.1614e-09	-0.263559	0.814	0.858	3.49239e-05	S100 calcium binding protein A9 (calgranulin B) [Source:MGI Symbol;Acc:MGI:1338947]
3	S100a8	3.31246e-09	-0.223286	0.784	0.836	5.35227e-05	S100 calcium binding protein A8 (calgranulin A) [Source:MGI Symbol;Acc:MGI:88244]
3	Cd52	4.02536e-09	0.676211	0.781	0.658	6.50417e-05	CD52 antigen [Source:MGI Symbol;Acc:MGI:1346088]
3	Hba-a1	5.37747e-08	0.679954	0.391	0.032	0.000868892	hemoglobin alpha, adult chain 1 [Source:MGI Symbol;Acc:MGI:96015]
3	Igkc	8.42562e-08	-0.171089	0.97	0.95	0.00136141	immunoglobulin kappa constant [Source:MGI Symbol;Acc:MGI:96495]
3	Rps15	1.45132e-07	-0.106297	0.817	0.852	0.00234504	ribosomal protein S15 [Source:MGI Symbol;Acc:MGI:98117]
3	Camp	1.82298e-07	-0.222875	0.399	0.516	0.00294558	cathelicidin antimicrobial peptide [Source:MGI Symbol;Acc:MGI:108443]
3	Celf1	2.27373e-07	-0.197955	0.34	0.458	0.00367389	CUGBP, Elav-like family member 1 [Source:MGI Symbol;Acc:MGI:1342295]
3	Ddx5	2.72396e-07	-0.0436476	0.899	0.926	0.00440138	DEAD box helicase 5 [Source:MGI Symbol;Acc:MGI:105037]
3	Cd19	2.79944e-07	-0.22104	0.21	0.342	0.00452334	CD19 antigen [Source:MGI Symbol;Acc:MGI:88319]
3	Rsrp1	1.63938e-06	-0.0861854	0.737	0.78	0.0264891	arginine/serine rich protein 1 [Source:MGI Symbol;Acc:MGI:106498]
3	Rplp2	2.11504e-06	-0.0635299	0.899	0.936	0.0341748	ribosomal protein, large P2 [Source:MGI Symbol;Acc:MGI:1914436]
4	Ubb	5.38275e-38	1.12971	0.964	0.874	8.69744e-34	ubiquitin B [Source:MGI Symbol;Acc:MGI:98888]
4	Rpl11	6.09421e-31	0.649909	0.995	1	9.84703e-27	ribosomal protein L11 [Source:MGI Symbol;Acc:MGI:1914275]
4	Rps3	7.47136e-25	0.596553	0.995	0.993	1.20722e-20	ribosomal protein S3 [Source:MGI Symbol;Acc:MGI:1350917]
4	Rpl34	6.80699e-23	0.586185	1	0.996	1.09987e-18	ribosomal protein L34 [Source:MGI Symbol;Acc:MGI:1915686]
4	Uba52	2.98695e-22	0.84488	0.955	0.898	4.82631e-18	ubiquitin A-52 residue ribosomal protein fusion product 1 [Source:MGI Symbol;Acc:MGI:98887]
4	Rps11	2.3809e-21	0.728581	0.995	0.993	3.84706e-17	ribosomal protein S11 [Source:MGI Symbol;Acc:MGI:1351329]
4	Rpl32	9.55078e-20	0.591849	0.995	0.989	1.54321e-15	ribosomal protein L32 [Source:MGI Symbol;Acc:MGI:98038]
4	Rpl9	9.84645e-20	0.572459	0.995	1	1.59099e-15	ribosomal protein L9 [Source:MGI Symbol;Acc:MGI:1298373]
4	Emp3	5.15158e-19	0.880525	0.955	0.807	8.32393e-15	epithelial membrane protein 3 [Source:MGI Symbol;Acc:MGI:1098729]
4	AY036118	5.47157e-19	1.12049	0.815	0.572	8.84096e-15	NA
4	Rpl21	7.81139e-19	0.559277	0.991	0.996	1.26216e-14	ribosomal protein L21 [Source:MGI Symbol;Acc:MGI:1278340]
4	Rpl10	2.83498e-18	0.69991	0.986	0.972	4.58075e-14	ribosomal protein L10 [Source:MGI Symbol;Acc:MGI:105943]
4	Fau	6.76655e-18	0.517156	0.995	1	1.09334e-13	Finkel-Biskis-Reilly murine sarcoma virus (FBR-MuSV) ubiquitously expressed (fox derived) [Source:MGI Symbol;Acc:MGI:102547]
4	Rps15a	6.88708e-18	0.581533	0.995	0.986	1.11282e-13	ribosomal protein S15A [Source:MGI Symbol;Acc:MGI:2389091]
4	Tmsb10	2.39415e-17	0.707547	0.995	0.996	3.86847e-13	thymosin, beta 10 [Source:MGI Symbol;Acc:MGI:109146]
4	Rpl15	5.43204e-16	0.624374	0.982	0.947	8.77709e-12	ribosomal protein L15 [Source:MGI Symbol;Acc:MGI:1913730]
4	Clic1	1.27184e-15	0.711	0.937	0.807	2.05503e-11	chloride intracellular channel 1 [Source:MGI Symbol;Acc:MGI:2148924]
4	H3f3b	2.566e-15	0.672552	0.977	0.902	4.14615e-11	H3.3 histone B [Source:MGI Symbol;Acc:MGI:1101768]
4	Rpl24	6.93247e-15	0.614624	0.995	0.982	1.12015e-10	ribosomal protein L24 [Source:MGI Symbol;Acc:MGI:1915443]
4	Cyba	7.61131e-15	0.755887	0.95	0.719	1.22984e-10	cytochrome b-245, alpha polypeptide [Source:MGI Symbol;Acc:MGI:1316658]
4	Rbm3	1.38066e-14	0.716271	0.937	0.811	2.23088e-10	RNA binding motif (RNP1, RRM) protein 3 [Source:MGI Symbol;Acc:MGI:1099460]
4	Psmb8	1.4333e-14	0.678542	0.91	0.761	2.31592e-10	proteasome (prosome, macropain) subunit, beta type 8 (large multifunctional peptidase 7) [Source:MGI Symbol;Acc:MGI:1346527]
4	Rpl23a	2.77848e-14	-0.161135	0.986	0.993	4.48947e-10	ribosomal protein L23A [Source:MGI Symbol;Acc:MGI:3040672]
4	mt-Co1	3.74174e-14	-0.375397	1	1	6.0459e-10	mitochondrially encoded cytochrome c oxidase I [Source:MGI Symbol;Acc:MGI:102504]
4	S100a10	9.30345e-14	0.882145	1	0.965	1.50325e-09	S100 calcium binding protein A10 (calpactin) [Source:MGI Symbol;Acc:MGI:1339468]
4	Lgals1	1.6864e-13	1.02337	0.923	0.825	2.72489e-09	lectin, galactose binding, soluble 1 [Source:MGI Symbol;Acc:MGI:96777]
4	H2-D1	1.96358e-13	0.603467	1	1	3.17276e-09	histocompatibility 2, D region locus 1 [Source:MGI Symbol;Acc:MGI:95896]
4	Rpl19	2.07266e-13	0.458579	0.995	1	3.349e-09	ribosomal protein L19 [Source:MGI Symbol;Acc:MGI:98020]
4	Dnaja1	2.38695e-13	-0.39859	0.725	0.867	3.85683e-09	DnaJ heat shock protein family (Hsp40) member A1 [Source:MGI Symbol;Acc:MGI:1270129]
4	Eif4a2	2.49667e-13	-0.436586	0.545	0.712	4.03411e-09	eukaryotic translation initiation factor 4A2 [Source:MGI Symbol;Acc:MGI:106906]
4	Tspo	2.70506e-13	0.639317	0.914	0.754	4.37084e-09	translocator protein [Source:MGI Symbol;Acc:MGI:88222]
4	mt-Nd4	4.65492e-13	-0.370714	0.995	1	7.52142e-09	mitochondrially encoded NADH dehydrogenase 4 [Source:MGI Symbol;Acc:MGI:102498]
4	Rps7	5.32972e-13	0.491256	0.995	0.982	8.61175e-09	ribosomal protein S7 [Source:MGI Symbol;Acc:MGI:1333818]
4	S100a11	9.27994e-13	0.780978	0.973	0.839	1.49945e-08	S100 calcium binding protein A11 [Source:MGI Symbol;Acc:MGI:1338798]
4	Ppib	9.54013e-13	0.657279	0.811	0.628	1.54149e-08	peptidylprolyl isomerase B [Source:MGI Symbol;Acc:MGI:97750]
4	Crip1	1.10326e-12	0.886013	0.991	0.982	1.78264e-08	cysteine-rich protein 1 (intestinal) [Source:MGI Symbol;Acc:MGI:88501]
4	Rpl37a	1.39833e-12	-0.0160709	1	1	2.25942e-08	ribosomal protein L37a [Source:MGI Symbol;Acc:MGI:98068]
4	mt-Co2	5.31437e-12	-0.33312	1	1	8.58695e-08	mitochondrially encoded cytochrome c oxidase II [Source:MGI Symbol;Acc:MGI:102503]
4	Fxyd5	5.38444e-12	0.61229	0.982	0.916	8.70018e-08	FXYD domain-containing ion transport regulator 5 [Source:MGI Symbol;Acc:MGI:1201785]
4	Hspa8	7.54294e-12	-0.243521	0.973	0.982	1.21879e-07	heat shock protein 8 [Source:MGI Symbol;Acc:MGI:105384]
4	Rps18	1.00835e-11	0.515441	0.995	0.989	1.62929e-07	ribosomal protein S18 [Source:MGI Symbol;Acc:MGI:98146]
4	Ppia	1.78075e-11	0.550999	1	0.989	2.87734e-07	peptidylprolyl isomerase A [Source:MGI Symbol;Acc:MGI:97749]
4	Elob	1.79492e-11	0.597567	0.869	0.646	2.90024e-07	elongin B [Source:MGI Symbol;Acc:MGI:1914923]
4	Ftl1	2.77717e-11	0.628335	0.851	0.737	4.48735e-07	ferritin light polypeptide 1 [Source:MGI Symbol;Acc:MGI:95589]
4	Pabpc1	5.83452e-11	-0.229275	0.95	0.972	9.42742e-07	poly(A) binding protein, cytoplasmic 1 [Source:MGI Symbol;Acc:MGI:1349722]
4	Tpt1	7.8758e-11	0.43527	1	1	1.27257e-06	tumor protein, translationally-controlled 1 [Source:MGI Symbol;Acc:MGI:104890]
4	Rps15	3.33199e-10	-0.0719547	0.991	0.996	5.38382e-06	ribosomal protein S15 [Source:MGI Symbol;Acc:MGI:98117]
4	Nme2	3.67295e-10	0.638174	0.878	0.712	5.93476e-06	NME/NM23 nucleoside diphosphate kinase 2 [Source:MGI Symbol;Acc:MGI:97356]
4	Sfpq	4.04718e-10	-0.369069	0.712	0.804	6.53944e-06	splicing factor proline/glutamine rich (polypyrimidine tract binding protein associated) [Source:MGI Symbol;Acc:MGI:1918764]
4	Selenow	4.39334e-10	0.590008	0.86	0.649	7.09876e-06	selenoprotein W [Source:MGI Symbol;Acc:MGI:1100878]
4	Spcs2	8.94009e-10	0.559057	0.811	0.589	1.44454e-05	signal peptidase complex subunit 2 homolog (S. cerevisiae) [Source:MGI Symbol;Acc:MGI:1913874]
4	Rps4x	1.24298e-09	0.455694	0.995	1	2.0084e-05	ribosomal protein S4, X-linked [Source:MGI Symbol;Acc:MGI:98158]
4	Rps12	1.3251e-09	-0.110157	1	0.996	2.1411e-05	ribosomal protein S12 [Source:MGI Symbol;Acc:MGI:98105]
4	Cd3g	2.08392e-09	0.576375	0.986	0.951	3.3672e-05	CD3 antigen, gamma polypeptide [Source:MGI Symbol;Acc:MGI:88333]
4	Tagln2	2.15455e-09	0.662586	0.842	0.723	3.48133e-05	transgelin 2 [Source:MGI Symbol;Acc:MGI:1312985]
4	Hsp90aa1	2.36339e-09	-0.404693	0.73	0.779	3.81876e-05	heat shock protein 90, alpha (cytosolic), class A member 1 [Source:MGI Symbol;Acc:MGI:96250]
4	Rpl8	3.29103e-09	0.446887	0.995	0.989	5.31764e-05	ribosomal protein L8 [Source:MGI Symbol;Acc:MGI:1350927]
4	Itm2b	7.51875e-09	0.585355	0.964	0.905	0.000121488	integral membrane protein 2B [Source:MGI Symbol;Acc:MGI:1309517]
4	Cd28	7.61507e-09	-0.345615	0.667	0.744	0.000123044	CD28 antigen [Source:MGI Symbol;Acc:MGI:88327]
4	Rpl28	8.71248e-09	0.494617	1	0.982	0.000140776	ribosomal protein L28 [Source:MGI Symbol;Acc:MGI:101839]
4	Rpl17	8.75643e-09	0.391296	1	1	0.000141486	ribosomal protein L17 [Source:MGI Symbol;Acc:MGI:2448270]
4	Pycard	8.82776e-09	0.712563	0.766	0.614	0.000142639	PYD and CARD domain containing [Source:MGI Symbol;Acc:MGI:1931465]
4	Rpl14	1.01956e-08	0.481743	0.986	0.951	0.00016474	ribosomal protein L14 [Source:MGI Symbol;Acc:MGI:1914365]
4	Fth1	1.2407e-08	0.513532	0.986	0.94	0.000200472	ferritin heavy polypeptide 1 [Source:MGI Symbol;Acc:MGI:95588]
4	H3f3a	1.24132e-08	0.517944	0.968	0.891	0.000200573	H3.3 histone A [Source:MGI Symbol;Acc:MGI:1097686]
4	Ssr4	1.28451e-08	0.544321	0.649	0.368	0.000207552	signal sequence receptor, delta [Source:MGI Symbol;Acc:MGI:1099464]
4	Arid1a	1.64599e-08	-0.310975	0.563	0.723	0.000265959	AT rich interactive domain 1A (SWI-like) [Source:MGI Symbol;Acc:MGI:1935147]
4	mt-Atp6	1.69264e-08	-0.247424	1	1	0.000273496	mitochondrially encoded ATP synthase 6 [Source:MGI Symbol;Acc:MGI:99927]
4	Rplp2	1.96026e-08	0.0182258	0.995	1	0.000316739	ribosomal protein, large P2 [Source:MGI Symbol;Acc:MGI:1914436]
4	Ikzf1	2.24824e-08	-0.304785	0.617	0.695	0.00036327	IKAROS family zinc finger 1 [Source:MGI Symbol;Acc:MGI:1342540]
4	Gm26917	2.69512e-08	-0.473158	0.563	0.67	0.000435477	NA
4	Rpl18a	3.26232e-08	0.442475	0.995	0.996	0.000527126	ribosomal protein L18A [Source:MGI Symbol;Acc:MGI:1924058]
4	mt-Cytb	3.49611e-08	-0.285519	1	1	0.000564901	mitochondrially encoded cytochrome b [Source:MGI Symbol;Acc:MGI:102501]
4	Itgal	4.11391e-08	-0.345194	0.748	0.835	0.000664726	integrin alpha L [Source:MGI Symbol;Acc:MGI:96606]
4	Rpl13	4.54576e-08	0.403763	0.995	1	0.000734505	ribosomal protein L13 [Source:MGI Symbol;Acc:MGI:105922]
4	Krtcap2	4.94962e-08	0.517849	0.752	0.488	0.00079976	keratinocyte associated protein 2 [Source:MGI Symbol;Acc:MGI:1913309]
4	Hnrnph1	7.48769e-08	-0.314239	0.545	0.663	0.00120986	heterogeneous nuclear ribonucleoprotein H1 [Source:MGI Symbol;Acc:MGI:1891925]
4	Pde7a	8.71434e-08	-0.341733	0.306	0.467	0.00140806	phosphodiesterase 7A [Source:MGI Symbol;Acc:MGI:1202402]
4	mt-Co3	1.0986e-07	-0.254736	1	1	0.00177512	mitochondrially encoded cytochrome c oxidase III [Source:MGI Symbol;Acc:MGI:102502]
4	Hsp90ab1	1.10346e-07	-0.214757	0.968	0.979	0.00178297	heat shock protein 90 alpha (cytosolic), class B member 1 [Source:MGI Symbol;Acc:MGI:96247]
4	Dazap2	1.11198e-07	-0.261397	0.644	0.712	0.00179673	DAZ associated protein 2 [Source:MGI Symbol;Acc:MGI:1344344]
4	Cox8a	1.4659e-07	0.511121	0.905	0.761	0.0023686	cytochrome c oxidase subunit 8A [Source:MGI Symbol;Acc:MGI:105959]
4	Atp5d	1.56116e-07	0.504911	0.748	0.575	0.00252252	ATP synthase, H+ transporting, mitochondrial F1 complex, delta subunit [Source:MGI Symbol;Acc:MGI:1913293]
4	Ogt	1.59513e-07	-0.223872	0.887	0.867	0.00257741	O-linked N-acetylglucosamine (GlcNAc) transferase (UDP-N-acetylglucosamine:polypeptide-N-acetylglucosaminyl transferase) [Source:MGI Symbol;Acc:MGI:1339639]
4	Rps9	1.60042e-07	-0.000187473	0.995	1	0.00258596	ribosomal protein S9 [Source:MGI Symbol;Acc:MGI:1924096]
4	Rplp0	1.60741e-07	0.515299	0.991	0.982	0.00259726	ribosomal protein, large, P0 [Source:MGI Symbol;Acc:MGI:1927636]
4	Wdr1	1.69186e-07	-0.262528	0.608	0.705	0.0027337	WD repeat domain 1 [Source:MGI Symbol;Acc:MGI:1337100]
4	Naca	1.78197e-07	0.510462	0.968	0.93	0.0028793	nascent polypeptide-associated complex alpha polypeptide [Source:MGI Symbol;Acc:MGI:106095]
4	S100a4	2.24679e-07	0.837823	0.941	0.891	0.00363036	S100 calcium binding protein A4 [Source:MGI Symbol;Acc:MGI:1330282]
4	Rpl36	2.2888e-07	0.408815	0.991	0.993	0.00369824	ribosomal protein L36 [Source:MGI Symbol;Acc:MGI:1860603]
4	Ndufa7	2.67473e-07	0.495538	0.667	0.439	0.00432183	NADH:ubiquinone oxidoreductase subunit A7 [Source:MGI Symbol;Acc:MGI:1913666]
4	Cnot6l	2.6912e-07	-0.267629	0.608	0.712	0.00434843	CCR4-NOT transcription complex, subunit 6-like [Source:MGI Symbol;Acc:MGI:2443154]
4	2023-09-01	2.78169e-07	0.512954	0.869	0.733	0.00449466	NA
4	Pfn1	3.14111e-07	0.486059	1	0.982	0.00507541	profilin 1 [Source:MGI Symbol;Acc:MGI:97549]
4	Rps13	3.17351e-07	0.378508	1	1	0.00512775	ribosomal protein S13 [Source:MGI Symbol;Acc:MGI:1915302]
4	Park7	3.2003e-07	0.45918	0.73	0.491	0.00517105	Parkinson disease (autosomal recessive, early onset) 7 [Source:MGI Symbol;Acc:MGI:2135637]
4	Rpl26	3.9121e-07	0.402056	1	0.986	0.00632117	ribosomal protein L26 [Source:MGI Symbol;Acc:MGI:106022]
4	Arl4c	5.15777e-07	-0.269079	0.622	0.737	0.00833392	ADP-ribosylation factor-like 4C [Source:MGI Symbol;Acc:MGI:2445172]
4	Ccnd2	5.65466e-07	-0.279008	0.82	0.867	0.00913679	cyclin D2 [Source:MGI Symbol;Acc:MGI:88314]
4	Hsph1	6.25658e-07	-0.332508	0.171	0.375	0.0101094	heat shock 105kDa/110kDa protein 1 [Source:MGI Symbol;Acc:MGI:105053]
4	Eef1g	6.55262e-07	-0.199386	0.856	0.832	0.0105877	eukaryotic translation elongation factor 1 gamma [Source:MGI Symbol;Acc:MGI:1914410]
4	Eif4g2	6.65521e-07	-0.221285	0.851	0.863	0.0107535	eukaryotic translation initiation factor 4, gamma 2 [Source:MGI Symbol;Acc:MGI:109207]
4	Ltb	7.03749e-07	0.621236	0.932	0.881	0.0113712	lymphotoxin B [Source:MGI Symbol;Acc:MGI:104796]
4	Cd52	7.54058e-07	0.60233	1	0.993	0.0121841	CD52 antigen [Source:MGI Symbol;Acc:MGI:1346088]
4	Ost4	1.09952e-06	0.449131	0.73	0.572	0.017766	oligosaccharyltransferase complex subunit 4 (non-catalytic) [Source:MGI Symbol;Acc:MGI:1914945]
4	Pcbp1	1.21538e-06	-0.250095	0.577	0.653	0.0196381	poly(rC) binding protein 1 [Source:MGI Symbol;Acc:MGI:1345635]
4	Cd3d	1.28838e-06	0.484939	0.959	0.87	0.0208177	CD3 antigen, delta polypeptide [Source:MGI Symbol;Acc:MGI:88331]
4	Dad1	1.30112e-06	0.460862	0.824	0.635	0.0210235	defender against cell death 1 [Source:MGI Symbol;Acc:MGI:101912]
4	Btf3	1.32903e-06	0.465019	0.946	0.863	0.0214745	basic transcription factor 3 [Source:MGI Symbol;Acc:MGI:1202875]
4	Hspe1	1.71087e-06	-0.247187	0.595	0.691	0.0276443	heat shock protein 1 (chaperonin 10) [Source:MGI Symbol;Acc:MGI:104680]
4	2023-09-09	1.98068e-06	-0.219938	0.698	0.754	0.0320039	NA
4	Mob1a	1.98447e-06	-0.226706	0.59	0.702	0.0320651	MOB kinase activator 1A [Source:MGI Symbol;Acc:MGI:2442631]
4	Gm11808	2.25325e-06	0.465968	0.505	0.235	0.036408	predicted gene 11808 [Source:MGI Symbol;Acc:MGI:3649356]
4	Tcf7	2.42443e-06	-0.340964	0.613	0.702	0.0391739	transcription factor 7, T cell specific [Source:MGI Symbol;Acc:MGI:98507]
4	Zfp207	2.57434e-06	-0.247779	0.613	0.681	0.0415962	zinc finger protein 207 [Source:MGI Symbol;Acc:MGI:1340045]
5	Ubb	3.76241e-22	0.832164	0.963	0.921	6.0793e-18	ubiquitin B [Source:MGI Symbol;Acc:MGI:98888]
5	Hbb-bs	2.04744e-19	1.47456	0.725	0.079	3.30826e-15	hemoglobin, beta adult s chain [Source:MGI Symbol;Acc:MGI:5474852]
5	Rps11	3.87435e-15	0.402829	1	1	6.26018e-11	ribosomal protein S11 [Source:MGI Symbol;Acc:MGI:1351329]
5	Rpl11	5.94967e-15	0.415659	1	0.993	9.61348e-11	ribosomal protein L11 [Source:MGI Symbol;Acc:MGI:1914275]
5	H2-D1	9.94032e-15	0.519462	1	1	1.60616e-10	histocompatibility 2, D region locus 1 [Source:MGI Symbol;Acc:MGI:95896]
5	Rps15a	5.53831e-14	0.396325	1	0.993	8.94879e-10	ribosomal protein S15A [Source:MGI Symbol;Acc:MGI:2389091]
5	S100a11	8.18651e-13	0.852215	0.925	0.702	1.32278e-08	S100 calcium binding protein A11 [Source:MGI Symbol;Acc:MGI:1338798]
5	Dnaja1	8.23891e-13	-0.780561	0.75	0.921	1.33124e-08	DnaJ heat shock protein family (Hsp40) member A1 [Source:MGI Symbol;Acc:MGI:1270129]
5	S100a10	9.55737e-13	0.84152	0.938	0.849	1.54428e-08	S100 calcium binding protein A10 (calpactin) [Source:MGI Symbol;Acc:MGI:1339468]
5	Hspa8	2.13372e-12	-0.565874	0.975	0.997	3.44766e-08	heat shock protein 8 [Source:MGI Symbol;Acc:MGI:105384]
5	Tmsb10	6.09352e-12	0.532188	1	1	9.84592e-08	thymosin, beta 10 [Source:MGI Symbol;Acc:MGI:109146]
5	AY036118	8.08633e-12	0.858423	0.95	0.708	1.30659e-07	NA
5	Ighm	1.49155e-11	-0.70422	0.988	1	2.41005e-07	immunoglobulin heavy constant mu [Source:MGI Symbol;Acc:MGI:96448]
5	Rpl23a	6.12057e-11	-0.379323	0.988	1	9.88961e-07	ribosomal protein L23A [Source:MGI Symbol;Acc:MGI:3040672]
5	Rps18	8.26574e-11	0.381901	1	0.997	1.33558e-06	ribosomal protein S18 [Source:MGI Symbol;Acc:MGI:98146]
5	Elob	1.22531e-10	0.605115	0.838	0.725	1.97985e-06	elongin B [Source:MGI Symbol;Acc:MGI:1914923]
5	Rps15	1.3565e-10	-0.282529	1	1	2.19183e-06	ribosomal protein S15 [Source:MGI Symbol;Acc:MGI:98117]
5	Rpl37a	1.4566e-10	-0.201486	1	1	2.35357e-06	ribosomal protein L37a [Source:MGI Symbol;Acc:MGI:98068]
5	Rps7	1.75825e-10	0.370034	0.988	1	2.84099e-06	ribosomal protein S7 [Source:MGI Symbol;Acc:MGI:1333818]
5	Rps12	7.06497e-10	-0.291778	1	1	1.14156e-05	ribosomal protein S12 [Source:MGI Symbol;Acc:MGI:98105]
5	Rpl32	1.44372e-09	0.360614	1	1	2.33276e-05	ribosomal protein L32 [Source:MGI Symbol;Acc:MGI:98038]
5	Uba52	1.58089e-09	0.501829	0.95	0.915	2.5544e-05	ubiquitin A-52 residue ribosomal protein fusion product 1 [Source:MGI Symbol;Acc:MGI:98887]
5	Rps9	1.74303e-09	-0.208714	1	1	2.81639e-05	ribosomal protein S9 [Source:MGI Symbol;Acc:MGI:1924096]
5	Rps3	4.37458e-09	0.30525	1	1	7.06844e-05	ribosomal protein S3 [Source:MGI Symbol;Acc:MGI:1350917]
5	Tnfrsf13c	4.64391e-09	-0.6767	0.425	0.725	7.50362e-05	tumor necrosis factor receptor superfamily, member 13c [Source:MGI Symbol;Acc:MGI:1919299]
5	Ifi27l2a	8.5197e-09	0.801396	0.9	0.784	0.000137661	interferon, alpha-inducible protein 27 like 2A [Source:MGI Symbol;Acc:MGI:1924183]
5	Rpl15	1.29337e-08	0.405704	0.975	0.99	0.000208982	ribosomal protein L15 [Source:MGI Symbol;Acc:MGI:1913730]
5	Rplp2	1.34563e-08	-0.187877	1	1	0.000217427	ribosomal protein, large P2 [Source:MGI Symbol;Acc:MGI:1914436]
5	Mat2a	1.42542e-08	-0.623319	0.637	0.813	0.00023032	methionine adenosyltransferase II, alpha [Source:MGI Symbol;Acc:MGI:2443731]
5	Hspe1	2.78524e-08	-0.596648	0.725	0.846	0.000450039	heat shock protein 1 (chaperonin 10) [Source:MGI Symbol;Acc:MGI:104680]
5	Cd52	2.95764e-08	0.519028	0.988	0.99	0.000477896	CD52 antigen [Source:MGI Symbol;Acc:MGI:1346088]
5	H2-Q4	3.29269e-08	0.528035	0.887	0.777	0.000532033	histocompatibility 2, Q region locus 4 [Source:MGI Symbol;Acc:MGI:95933]
5	Rbm3	6.56515e-08	0.507526	0.975	0.83	0.0010608	RNA binding motif (RNP1, RRM) protein 3 [Source:MGI Symbol;Acc:MGI:1099460]
5	Rpl34	6.71762e-08	0.280322	1	1	0.00108543	ribosomal protein L34 [Source:MGI Symbol;Acc:MGI:1915686]
5	Cd24a	7.46832e-08	-0.715917	0.212	0.511	0.00120673	CD24a antigen [Source:MGI Symbol;Acc:MGI:88323]
5	Trbc2	8.54899e-08	0.733569	0.95	0.869	0.00138135	T cell receptor beta, constant 2 [Source:MGI Symbol;Acc:MGI:4835227]
5	Tspo	9.73219e-08	0.53356	0.8	0.669	0.00157253	translocator protein [Source:MGI Symbol;Acc:MGI:88222]
5	Fxyd5	9.89228e-08	0.517769	0.963	0.859	0.00159839	FXYD domain-containing ion transport regulator 5 [Source:MGI Symbol;Acc:MGI:1201785]
5	Emp3	1.05857e-07	0.652054	0.75	0.646	0.00171043	epithelial membrane protein 3 [Source:MGI Symbol;Acc:MGI:1098729]
5	Ahnak	1.14124e-07	0.726207	0.812	0.777	0.00184402	AHNAK nucleoprotein (desmoyokin) [Source:MGI Symbol;Acc:MGI:1316648]
5	Rpl21	1.30873e-07	0.272666	1	1	0.00211464	ribosomal protein L21 [Source:MGI Symbol;Acc:MGI:1278340]
5	Lars2	1.73233e-07	0.52612	0.975	0.974	0.00279909	leucyl-tRNA synthetase, mitochondrial [Source:MGI Symbol;Acc:MGI:2142973]
5	Ep300	2.01169e-07	-0.54682	0.488	0.777	0.00325049	E1A binding protein p300 [Source:MGI Symbol;Acc:MGI:1276116]
5	Hba-a2	2.1547e-07	1.25887	0.488	0.066	0.00348157	hemoglobin alpha, adult chain 2 [Source:MGI Symbol;Acc:MGI:96016]
5	Lgals1	2.81304e-07	0.745626	0.575	0.377	0.00454531	lectin, galactose binding, soluble 1 [Source:MGI Symbol;Acc:MGI:96777]
5	Ppia	3.85335e-07	0.419013	0.975	0.98	0.00622625	peptidylprolyl isomerase A [Source:MGI Symbol;Acc:MGI:97749]
5	Sipa1	8.67758e-07	-0.515179	0.537	0.787	0.0140212	signal-induced proliferation associated gene 1 [Source:MGI Symbol;Acc:MGI:107576]
5	Xrn2	9.0044e-07	0.506871	0.75	0.557	0.0145493	5'-3' exoribonuclease 2 [Source:MGI Symbol;Acc:MGI:894687]
5	Cd3g	9.22519e-07	0.537054	0.95	0.882	0.0149061	CD3 antigen, gamma polypeptide [Source:MGI Symbol;Acc:MGI:88333]
5	Cd79b	1.00382e-06	-0.455225	0.963	0.98	0.0162197	CD79B antigen [Source:MGI Symbol;Acc:MGI:96431]
5	S100a6	1.03402e-06	0.985437	0.688	0.548	0.0167078	S100 calcium binding protein A6 (calcyclin) [Source:MGI Symbol;Acc:MGI:1339467]
5	Cyba	1.50528e-06	0.447782	0.95	0.882	0.0243223	cytochrome b-245, alpha polypeptide [Source:MGI Symbol;Acc:MGI:1316658]
5	Pfn1	2.11062e-06	0.373265	1	0.997	0.0341034	profilin 1 [Source:MGI Symbol;Acc:MGI:97549]
5	Rpl24	2.39142e-06	0.314828	1	0.984	0.0386405	ribosomal protein L24 [Source:MGI Symbol;Acc:MGI:1915443]
5	Ppib	2.4244e-06	0.453578	0.875	0.623	0.0391735	peptidylprolyl isomerase B [Source:MGI Symbol;Acc:MGI:97750]
5	Mrpl33	2.4918e-06	0.449611	0.625	0.489	0.0402624	mitochondrial ribosomal protein L33 [Source:MGI Symbol;Acc:MGI:2137225]
5	Serp1	2.51194e-06	-0.467105	0.7	0.849	0.0405879	stress-associated endoplasmic reticulum protein 1 [Source:MGI Symbol;Acc:MGI:92638]
6	Hbb-bs	2.21094e-39	1.505	0.753	0.104	3.57243e-35	hemoglobin, beta adult s chain [Source:MGI Symbol;Acc:MGI:5474852]
6	Ubb	2.12495e-32	1.29728	0.969	0.874	3.43349e-28	ubiquitin B [Source:MGI Symbol;Acc:MGI:98888]
6	Uba52	2.54393e-31	1.24569	0.951	0.919	4.11047e-27	ubiquitin A-52 residue ribosomal protein fusion product 1 [Source:MGI Symbol;Acc:MGI:98887]
6	Rps7	5.07811e-24	0.851877	1	0.986	8.20521e-20	ribosomal protein S7 [Source:MGI Symbol;Acc:MGI:1333818]
6	Rps18	6.63059e-24	0.927846	1	0.995	1.07137e-19	ribosomal protein S18 [Source:MGI Symbol;Acc:MGI:98146]
6	Rpl21	4.59249e-23	0.833862	1	0.995	7.42055e-19	ribosomal protein L21 [Source:MGI Symbol;Acc:MGI:1278340]
6	Rpl34	3.13124e-20	0.843101	0.988	0.995	5.05946e-16	ribosomal protein L34 [Source:MGI Symbol;Acc:MGI:1915686]
6	S100a8	5.17432e-20	-0.840248	0.519	0.869	8.36067e-16	S100 calcium binding protein A8 (calgranulin A) [Source:MGI Symbol;Acc:MGI:88244]
6	Rpl9	5.78e-20	0.832055	0.994	0.995	9.33933e-16	ribosomal protein L9 [Source:MGI Symbol;Acc:MGI:1298373]
6	S100a9	1.36488e-19	-0.824754	0.488	0.856	2.20537e-15	S100 calcium binding protein A9 (calgranulin B) [Source:MGI Symbol;Acc:MGI:1338947]
6	mt-Co1	2.00607e-19	-0.31731	1	1	3.24142e-15	mitochondrially encoded cytochrome c oxidase I [Source:MGI Symbol;Acc:MGI:102504]
6	mt-Co2	2.32021e-19	-0.249709	1	1	3.749e-15	mitochondrially encoded cytochrome c oxidase II [Source:MGI Symbol;Acc:MGI:102503]
6	Rps3	1.97125e-18	0.807388	0.994	0.982	3.18515e-14	ribosomal protein S3 [Source:MGI Symbol;Acc:MGI:1350917]
6	Rpl32	5.48845e-18	0.909388	0.988	0.995	8.86824e-14	ribosomal protein L32 [Source:MGI Symbol;Acc:MGI:98038]
6	Rps15a	1.49768e-17	0.827853	1	0.995	2.41995e-13	ribosomal protein S15A [Source:MGI Symbol;Acc:MGI:2389091]
6	Rps11	1.02913e-16	0.833313	0.994	1	1.66287e-12	ribosomal protein S11 [Source:MGI Symbol;Acc:MGI:1351329]
6	Ppia	2.61636e-16	0.904707	0.981	0.932	4.22751e-12	peptidylprolyl isomerase A [Source:MGI Symbol;Acc:MGI:97749]
6	Dnaja1	2.6806e-16	-0.471638	0.636	0.824	4.33131e-12	DnaJ heat shock protein family (Hsp40) member A1 [Source:MGI Symbol;Acc:MGI:1270129]
6	Hba-a2	2.99487e-16	1.1654	0.605	0.027	4.83911e-12	hemoglobin alpha, adult chain 2 [Source:MGI Symbol;Acc:MGI:96016]
6	Rpl10	4.9646e-16	0.920355	1	0.977	8.0218e-12	ribosomal protein L10 [Source:MGI Symbol;Acc:MGI:105943]
6	Rpl11	1.5027e-14	0.755695	0.994	0.986	2.42806e-10	ribosomal protein L11 [Source:MGI Symbol;Acc:MGI:1914275]
6	Fau	1.88672e-14	0.697613	1	1	3.04857e-10	Finkel-Biskis-Reilly murine sarcoma virus (FBR-MuSV) ubiquitously expressed (fox derived) [Source:MGI Symbol;Acc:MGI:102547]
6	mt-Nd4	1.95987e-14	-0.245834	0.988	1	3.16676e-10	mitochondrially encoded NADH dehydrogenase 4 [Source:MGI Symbol;Acc:MGI:102498]
6	Rps4x	2.48603e-14	0.752397	0.994	0.995	4.01693e-10	ribosomal protein S4, X-linked [Source:MGI Symbol;Acc:MGI:98158]
6	Hba-a1	3.50452e-14	1.00306	0.574	0.023	5.6626e-10	hemoglobin alpha, adult chain 1 [Source:MGI Symbol;Acc:MGI:96015]
6	Rplp0	1.42799e-13	0.918894	1	0.977	2.30734e-09	ribosomal protein, large, P0 [Source:MGI Symbol;Acc:MGI:1927636]
6	Hspa8	1.57803e-13	-0.174679	0.889	0.964	2.54979e-09	heat shock protein 8 [Source:MGI Symbol;Acc:MGI:105384]
6	Rpl15	1.60977e-13	0.856954	0.975	0.977	2.60107e-09	ribosomal protein L15 [Source:MGI Symbol;Acc:MGI:1913730]
6	Gm26917	1.77671e-13	-0.522412	0.605	0.757	2.87081e-09	NA
6	Gm42418	1.09204e-12	-0.639019	1	1	1.76452e-08	NA
6	Rpl26	1.44762e-12	0.71497	1	0.995	2.33907e-08	ribosomal protein L26 [Source:MGI Symbol;Acc:MGI:106022]
6	Tpt1	3.24797e-12	0.66557	1	1	5.24807e-08	tumor protein, translationally-controlled 1 [Source:MGI Symbol;Acc:MGI:104890]
6	Tmsb10	5.49704e-12	0.846046	1	1	8.88212e-08	thymosin, beta 10 [Source:MGI Symbol;Acc:MGI:109146]
6	Etnk1	7.83118e-12	-0.431614	0.457	0.667	1.26536e-07	ethanolamine kinase 1 [Source:MGI Symbol;Acc:MGI:1922570]
6	mt-Atp6	1.62054e-11	-0.16427	1	1	2.61847e-07	mitochondrially encoded ATP synthase 6 [Source:MGI Symbol;Acc:MGI:99927]
6	Ftl1	3.095e-11	0.851521	0.87	0.662	5.0009e-07	ferritin light polypeptide 1 [Source:MGI Symbol;Acc:MGI:95589]
6	Cd52	3.3882e-11	0.992093	0.969	0.95	5.47466e-07	CD52 antigen [Source:MGI Symbol;Acc:MGI:1346088]
6	Rpl8	4.93876e-11	0.726447	0.994	0.995	7.98005e-07	ribosomal protein L8 [Source:MGI Symbol;Acc:MGI:1350927]
6	Rpl35	5.50657e-11	0.814228	0.975	0.968	8.89751e-07	ribosomal protein L35 [Source:MGI Symbol;Acc:MGI:1913739]
6	Rbm3	5.64916e-11	0.874987	0.846	0.694	9.12791e-07	RNA binding motif (RNP1, RRM) protein 3 [Source:MGI Symbol;Acc:MGI:1099460]
6	Pabpc1	7.19708e-11	-0.103608	0.957	0.977	1.1629e-06	poly(A) binding protein, cytoplasmic 1 [Source:MGI Symbol;Acc:MGI:1349722]
6	Laptm5	7.91006e-11	-0.192177	0.907	0.986	1.27811e-06	lysosomal-associated protein transmembrane 5 [Source:MGI Symbol;Acc:MGI:108046]
6	mt-Co3	9.03562e-11	-0.100869	1	1	1.45998e-06	mitochondrially encoded cytochrome c oxidase III [Source:MGI Symbol;Acc:MGI:102502]
6	Rpl36	2.07251e-10	0.727354	0.988	1	3.34876e-06	ribosomal protein L36 [Source:MGI Symbol;Acc:MGI:1860603]
6	Ppp2r5c	3.77991e-10	-0.363436	0.42	0.608	6.10758e-06	protein phosphatase 2, regulatory subunit B', gamma [Source:MGI Symbol;Acc:MGI:1349475]
6	Camp	4.40685e-10	-0.47107	0.247	0.509	7.12059e-06	cathelicidin antimicrobial peptide [Source:MGI Symbol;Acc:MGI:108443]
6	Sfpq	4.57716e-10	-0.292066	0.63	0.752	7.39578e-06	splicing factor proline/glutamine rich (polypyrimidine tract binding protein associated) [Source:MGI Symbol;Acc:MGI:1918764]
6	Rps10	5.9253e-10	0.65376	1	1	9.5741e-06	ribosomal protein S10 [Source:MGI Symbol;Acc:MGI:1914347]
6	Rpl19	6.23112e-10	0.657278	0.994	0.995	1.00682e-05	ribosomal protein L19 [Source:MGI Symbol;Acc:MGI:98020]
6	Tardbp	1.17164e-09	-0.325653	0.463	0.631	1.89314e-05	TAR DNA binding protein [Source:MGI Symbol;Acc:MGI:2387629]
6	Hsp90aa1	1.44653e-09	-0.33226	0.648	0.716	2.3373e-05	heat shock protein 90, alpha (cytosolic), class A member 1 [Source:MGI Symbol;Acc:MGI:96250]
6	Celf1	1.81806e-09	-0.350381	0.444	0.568	2.93762e-05	CUGBP, Elav-like family member 1 [Source:MGI Symbol;Acc:MGI:1342295]
6	Rpl13	1.99313e-09	0.688153	0.994	1	3.22051e-05	ribosomal protein L13 [Source:MGI Symbol;Acc:MGI:105922]
6	Elob	2.19341e-09	0.713998	0.753	0.5	3.54412e-05	elongin B [Source:MGI Symbol;Acc:MGI:1914923]
6	Rpl14	2.54978e-09	0.754615	0.969	0.964	4.11993e-05	ribosomal protein L14 [Source:MGI Symbol;Acc:MGI:1914365]
6	Hspd1	2.83345e-09	-0.380468	0.327	0.541	4.57828e-05	heat shock protein 1 (chaperonin) [Source:MGI Symbol;Acc:MGI:96242]
6	Rsrp1	3.17211e-09	-0.234363	0.815	0.892	5.1255e-05	arginine/serine rich protein 1 [Source:MGI Symbol;Acc:MGI:106498]
6	Wnk1	4.94486e-09	-0.2698	0.654	0.77	7.98991e-05	WNK lysine deficient protein kinase 1 [Source:MGI Symbol;Acc:MGI:2442092]
6	Rps5	6.90005e-09	0.703454	1	0.986	0.000111491	ribosomal protein S5 [Source:MGI Symbol;Acc:MGI:1097682]
6	Psmb8	8.22265e-09	0.758286	0.858	0.739	0.000132862	proteasome (prosome, macropain) subunit, beta type 8 (large multifunctional peptidase 7) [Source:MGI Symbol;Acc:MGI:1346527]
6	H3f3a	1.23645e-08	0.75803	0.932	0.829	0.000199786	H3.3 histone A [Source:MGI Symbol;Acc:MGI:1097686]
6	Eif3a	1.28027e-08	-0.233371	0.642	0.842	0.000206867	eukaryotic translation initiation factor 3, subunit A [Source:MGI Symbol;Acc:MGI:95301]
6	Snrnp70	1.36015e-08	-0.270617	0.772	0.824	0.000219773	small nuclear ribonucleoprotein 70 (U1) [Source:MGI Symbol;Acc:MGI:98341]
6	Krit1	2.36971e-08	-0.33093	0.481	0.631	0.000382897	KRIT1, ankyrin repeat containing [Source:MGI Symbol;Acc:MGI:1930618]
6	Rpl37a	2.60212e-08	0.216296	1	1	0.000420451	ribosomal protein L37a [Source:MGI Symbol;Acc:MGI:98068]
6	Tmem30a	3.4548e-08	-0.322027	0.333	0.509	0.000558226	transmembrane protein 30A [Source:MGI Symbol;Acc:MGI:106402]
6	Ppib	3.83868e-08	0.652895	0.747	0.482	0.000620254	peptidylprolyl isomerase B [Source:MGI Symbol;Acc:MGI:97750]
6	Hnrnph1	5.39011e-08	-0.297913	0.599	0.734	0.000870934	heterogeneous nuclear ribonucleoprotein H1 [Source:MGI Symbol;Acc:MGI:1891925]
6	Mkln1	5.39225e-08	-0.304426	0.438	0.586	0.000871279	muskelin 1, intracellular mediator containing kelch motifs [Source:MGI Symbol;Acc:MGI:1351638]
6	Itgal	5.43884e-08	-0.29762	0.617	0.77	0.000878808	integrin alpha L [Source:MGI Symbol;Acc:MGI:96606]
6	Grk2	6.7004e-08	-0.23645	0.549	0.676	0.00108265	G protein-coupled receptor kinase 2 [Source:MGI Symbol;Acc:MGI:87940]
6	Mllt6	7.54073e-08	-0.304669	0.444	0.586	0.00121843	myeloid/lymphoid or mixed-lineage leukemia; translocated to, 6 [Source:MGI Symbol;Acc:MGI:1935145]
6	Igkc	7.61068e-08	-0.348825	0.944	0.977	0.00122973	immunoglobulin kappa constant [Source:MGI Symbol;Acc:MGI:96495]
6	Trip12	1.11164e-07	-0.263458	0.463	0.599	0.00179618	thyroid hormone receptor interactor 12 [Source:MGI Symbol;Acc:MGI:1309481]
6	Ptprc	1.30219e-07	-0.0902763	0.975	0.995	0.00210408	protein tyrosine phosphatase, receptor type, C [Source:MGI Symbol;Acc:MGI:97810]
6	Arfgef1	1.73441e-07	-0.28009	0.377	0.563	0.00280247	ADP-ribosylation factor guanine nucleotide-exchange factor 1(brefeldin A-inhibited) [Source:MGI Symbol;Acc:MGI:2442988]
6	Nfkb1	1.89891e-07	-0.204514	0.704	0.811	0.00306826	nuclear factor of kappa light polypeptide gene enhancer in B cells 1, p105 [Source:MGI Symbol;Acc:MGI:97312]
6	Rpl39	2.1311e-07	0.713689	0.994	1	0.00344344	ribosomal protein L39 [Source:MGI Symbol;Acc:MGI:1914498]
6	Pcbp1	2.18025e-07	-0.273162	0.488	0.613	0.00352285	poly(rC) binding protein 1 [Source:MGI Symbol;Acc:MGI:1345635]
6	Rpl18a	3.17947e-07	0.645288	1	0.986	0.00513738	ribosomal protein L18A [Source:MGI Symbol;Acc:MGI:1924058]
6	Rps15	3.20726e-07	0.175503	0.988	0.991	0.00518228	ribosomal protein S15 [Source:MGI Symbol;Acc:MGI:98117]
6	Mat2a	3.50692e-07	-0.307274	0.407	0.541	0.00566648	methionine adenosyltransferase II, alpha [Source:MGI Symbol;Acc:MGI:2443731]
6	Hnrnpa2b1	3.62897e-07	-0.0882578	0.901	0.968	0.00586369	heterogeneous nuclear ribonucleoprotein A2/B1 [Source:MGI Symbol;Acc:MGI:104819]
6	Eif4g2	4.26032e-07	-0.206487	0.735	0.793	0.00688382	eukaryotic translation initiation factor 4, gamma 2 [Source:MGI Symbol;Acc:MGI:109207]
6	Ogt	4.32248e-07	-0.182436	0.802	0.869	0.00698426	O-linked N-acetylglucosamine (GlcNAc) transferase (UDP-N-acetylglucosamine:polypeptide-N-acetylglucosaminyl transferase) [Source:MGI Symbol;Acc:MGI:1339639]
6	Phip	4.37391e-07	-0.331727	0.611	0.716	0.00706736	pleckstrin homology domain interacting protein [Source:MGI Symbol;Acc:MGI:1932404]
6	Nfkbia	4.38087e-07	0.72167	0.765	0.563	0.00707861	nuclear factor of kappa light polypeptide gene enhancer in B cells inhibitor, alpha [Source:MGI Symbol;Acc:MGI:104741]
6	BC005537	4.80979e-07	-0.220497	0.543	0.64	0.00777166	cDNA sequence BC005537 [Source:MGI Symbol;Acc:MGI:2441726]
6	Cnot6l	5.5677e-07	-0.212338	0.512	0.631	0.00899629	CCR4-NOT transcription complex, subunit 6-like [Source:MGI Symbol;Acc:MGI:2443154]
6	Ngp	5.68867e-07	-0.379796	0.154	0.383	0.00919175	neutrophilic granule protein [Source:MGI Symbol;Acc:MGI:105983]
6	Rpl24	6.02465e-07	0.691877	0.988	0.991	0.00973462	ribosomal protein L24 [Source:MGI Symbol;Acc:MGI:1915443]
6	Emp3	6.39249e-07	0.671947	0.716	0.495	0.010329	epithelial membrane protein 3 [Source:MGI Symbol;Acc:MGI:1098729]
6	Ubtf	6.47233e-07	-0.245064	0.438	0.581	0.010458	upstream binding transcription factor, RNA polymerase I [Source:MGI Symbol;Acc:MGI:98512]
6	Ankrd44	7.31311e-07	-0.233646	0.568	0.671	0.0118165	ankyrin repeat domain 44 [Source:MGI Symbol;Acc:MGI:3045243]
6	Clec2d	8.0127e-07	-0.211408	0.796	0.86	0.0129469	C-type lectin domain family 2, member d [Source:MGI Symbol;Acc:MGI:2135589]
6	Psap	8.10404e-07	-0.220446	0.568	0.617	0.0130945	prosaposin [Source:MGI Symbol;Acc:MGI:97783]
6	Map4k2	8.49978e-07	-0.255928	0.383	0.55	0.0137339	mitogen-activated protein kinase kinase kinase kinase 2 [Source:MGI Symbol;Acc:MGI:1346883]
6	Purb	8.62178e-07	-0.207473	0.549	0.649	0.0139311	purine rich element binding protein B [Source:MGI Symbol;Acc:MGI:1338779]
6	Gapdh	9.18715e-07	0.766968	0.852	0.761	0.0148446	glyceraldehyde-3-phosphate dehydrogenase [Source:MGI Symbol;Acc:MGI:95640]
6	Ttc39b	1.00232e-06	-0.24713	0.438	0.563	0.0161955	tetratricopeptide repeat domain 39B [Source:MGI Symbol;Acc:MGI:1917113]
6	Rgs10	1.11833e-06	0.753565	0.735	0.599	0.0180699	regulator of G-protein signalling 10 [Source:MGI Symbol;Acc:MGI:1915115]
6	Hbb-bt	1.11959e-06	0.754913	0.469	0.023	0.0180904	hemoglobin, beta adult t chain [Source:MGI Symbol;Acc:MGI:5474850]
6	Prpf38b	1.14988e-06	-0.219317	0.716	0.775	0.0185798	PRP38 pre-mRNA processing factor 38 (yeast) domain containing B [Source:MGI Symbol;Acc:MGI:1914171]
6	Ifi27l2a	1.28115e-06	0.871974	0.895	0.797	0.0207008	interferon, alpha-inducible protein 27 like 2A [Source:MGI Symbol;Acc:MGI:1924183]
6	Zfp207	1.31048e-06	-0.254506	0.5	0.586	0.0211747	zinc finger protein 207 [Source:MGI Symbol;Acc:MGI:1340045]
6	Dazap2	1.46711e-06	-0.257422	0.481	0.563	0.0237056	DAZ associated protein 2 [Source:MGI Symbol;Acc:MGI:1344344]
6	Csnk2a1	1.54534e-06	-0.23349	0.494	0.599	0.0249697	casein kinase 2, alpha 1 polypeptide [Source:MGI Symbol;Acc:MGI:88543]
6	B2m	1.61722e-06	0.0893519	1	1	0.026131	beta-2 microglobulin [Source:MGI Symbol;Acc:MGI:88127]
6	Selenow	1.63688e-06	0.654391	0.765	0.586	0.0264487	selenoprotein W [Source:MGI Symbol;Acc:MGI:1100878]
6	Rpl28	1.69798e-06	0.699373	0.994	0.991	0.0274359	ribosomal protein L28 [Source:MGI Symbol;Acc:MGI:101839]
6	Rpl23a	1.74358e-06	0.125382	0.975	0.995	0.0281728	ribosomal protein L23A [Source:MGI Symbol;Acc:MGI:3040672]
6	Ptbp3	1.77466e-06	-0.171737	0.605	0.698	0.028675	polypyrimidine tract binding protein 3 [Source:MGI Symbol;Acc:MGI:1923334]
6	Rpl17	1.81193e-06	0.588982	1	1	0.0292772	ribosomal protein L17 [Source:MGI Symbol;Acc:MGI:2448270]
6	Il2ra	1.95342e-06	-0.443041	0.506	0.554	0.0315634	interleukin 2 receptor, alpha chain [Source:MGI Symbol;Acc:MGI:96549]
6	Pfdn5	2.01412e-06	0.674109	0.87	0.847	0.0325441	prefoldin 5 [Source:MGI Symbol;Acc:MGI:1928753]
6	Mif	2.06116e-06	0.62665	0.66	0.428	0.0333042	macrophage migration inhibitory factor (glycosylation-inhibiting factor) [Source:MGI Symbol;Acc:MGI:96982]
6	Sesn3	2.11716e-06	-0.193822	0.617	0.676	0.0342091	sestrin 3 [Source:MGI Symbol;Acc:MGI:1922997]
6	Tnfrsf4	2.22373e-06	0.677532	0.623	0.405	0.035931	tumor necrosis factor receptor superfamily, member 4 [Source:MGI Symbol;Acc:MGI:104512]
6	Fth1	2.28328e-06	0.673043	0.944	0.919	0.0368932	ferritin heavy polypeptide 1 [Source:MGI Symbol;Acc:MGI:95588]
6	Rps13	2.38386e-06	0.58141	0.988	0.995	0.0385184	ribosomal protein S13 [Source:MGI Symbol;Acc:MGI:1915302]
6	Lfng	2.44245e-06	-0.237861	0.414	0.518	0.0394651	LFNG O-fucosylpeptide 3-beta-N-acetylglucosaminyltransferase [Source:MGI Symbol;Acc:MGI:1095413]
6	AU020206	2.45931e-06	-0.248523	0.463	0.613	0.0397375	expressed sequence AU020206 [Source:MGI Symbol;Acc:MGI:2142134]
