# Supplementary material for: Chronic hypoxia disrupts T regulatory cell phenotype contributing to the emergence of exTreg-TH17 cells
Source: Front Physiol. 2024 Jan 29;14:1304732. doi: 10.3389/fphys.2023.1304732 (PMC10859758; doi:10.3389/fphys.2023.1304732)
Supplement: Supplementary file 2 [file Table3.XLSX]

## Sheet: Bcells_markers
cluster_id	gene	p_val	avg_log2FC	pct.1	pct.2	p_val_adj	description
B cells	H3f3a	0	0.710351	0.964	0.951	0	H3.3 histone A [Source:MGI Symbol;Acc:MGI:1097686]
B cells	Rpl12	0	0.433829	0.986	0.993	0	ribosomal protein L12 [Source:MGI Symbol;Acc:MGI:98002]
B cells	Rpl35	0	0.4546	0.974	0.987	0	ribosomal protein L35 [Source:MGI Symbol;Acc:MGI:1913739]
B cells	Rps21	0	0.27587	0.993	0.999	0	ribosomal protein S21 [Source:MGI Symbol;Acc:MGI:1913731]
B cells	Rps3a1	0	0.299621	0.99	0.998	0	ribosomal protein S3A1 [Source:MGI Symbol;Acc:MGI:1202063]
B cells	Rps27	0	0.364833	0.994	0.999	0	ribosomal protein S27 [Source:MGI Symbol;Acc:MGI:1888676]
B cells	Rpl34	0	0.597406	0.98	0.992	0	ribosomal protein L34 [Source:MGI Symbol;Acc:MGI:1915686]
B cells	Rps20	0	0.345713	0.992	0.998	0	ribosomal protein S20 [Source:MGI Symbol;Acc:MGI:1914677]
B cells	Cd52	0	0.730092	0.986	0.988	0	CD52 antigen [Source:MGI Symbol;Acc:MGI:1346088]
B cells	Rpl11	0	0.595561	0.983	0.991	0	ribosomal protein L11 [Source:MGI Symbol;Acc:MGI:1914275]
B cells	Rpl9	0	0.573023	0.982	0.994	0	ribosomal protein L9 [Source:MGI Symbol;Acc:MGI:1298373]
B cells	Rplp0	0	0.620346	0.978	0.988	0	ribosomal protein, large, P0 [Source:MGI Symbol;Acc:MGI:1927636]
B cells	Rpl6	0	0.4227	0.979	0.993	0	ribosomal protein L6 [Source:MGI Symbol;Acc:MGI:108057]
B cells	Rpl21	0	0.583549	0.984	0.994	0	ribosomal protein L21 [Source:MGI Symbol;Acc:MGI:1278340]
B cells	Igkc	0	0.49275	0.997	0.999	0	immunoglobulin kappa constant [Source:MGI Symbol;Acc:MGI:96495]
B cells	Tmsb10	0	0.552956	0.978	0.985	0	thymosin, beta 10 [Source:MGI Symbol;Acc:MGI:109146]
B cells	Rpl32	0	0.669585	0.987	0.994	0	ribosomal protein L32 [Source:MGI Symbol;Acc:MGI:98038]
B cells	Rpl28	0	0.55626	0.982	0.99	0	ribosomal protein L28 [Source:MGI Symbol;Acc:MGI:101839]
B cells	Rps5	0	0.565438	0.988	0.992	0	ribosomal protein S5 [Source:MGI Symbol;Acc:MGI:1097682]
B cells	Cd79a	0	0.461367	0.987	0.992	0	CD79A antigen (immunoglobulin-associated alpha) [Source:MGI Symbol;Acc:MGI:101774]
B cells	Rps16	0	0.377147	0.991	0.997	0	ribosomal protein S16 [Source:MGI Symbol;Acc:MGI:98118]
B cells	Rps11	0	0.610616	0.984	0.993	0	ribosomal protein S11 [Source:MGI Symbol;Acc:MGI:1351329]
B cells	Rpl18	0	0.370962	0.984	0.992	0	ribosomal protein L18 [Source:MGI Symbol;Acc:MGI:98003]
B cells	Rps3	0	0.628455	0.984	0.989	0	ribosomal protein S3 [Source:MGI Symbol;Acc:MGI:1350917]
B cells	Rpl27a	0	0.401018	0.992	0.998	0	ribosomal protein L27A [Source:MGI Symbol;Acc:MGI:1347076]
B cells	Rps13	0	0.417615	0.992	0.996	0	ribosomal protein S13 [Source:MGI Symbol;Acc:MGI:1915302]
B cells	Rps15a	0	0.694723	0.985	0.993	0	ribosomal protein S15A [Source:MGI Symbol;Acc:MGI:2389091]
B cells	Uba52	0	0.861113	0.948	0.928	0	ubiquitin A-52 residue ribosomal protein fusion product 1 [Source:MGI Symbol;Acc:MGI:98887]
B cells	Rpl18a	0	0.413165	0.989	0.994	0	ribosomal protein L18A [Source:MGI Symbol;Acc:MGI:1924058]
B cells	Rpl13	0	0.482573	0.992	0.998	0	ribosomal protein L13 [Source:MGI Symbol;Acc:MGI:105922]
B cells	Eef1a1	0	0.295914	0.992	0.998	0	eukaryotic translation elongation factor 1 alpha 1 [Source:MGI Symbol;Acc:MGI:1096881]
B cells	Rpsa	0	0.380866	0.992	0.999	0	ribosomal protein SA [Source:MGI Symbol;Acc:MGI:105381]
B cells	Rpl14	0	0.537512	0.974	0.983	0	ribosomal protein L14 [Source:MGI Symbol;Acc:MGI:1914365]
B cells	Ppia	0	0.605136	0.969	0.972	0	peptidylprolyl isomerase A [Source:MGI Symbol;Acc:MGI:97749]
B cells	Rps27a	0	0.412303	0.991	0.996	0	ribosomal protein S27A [Source:MGI Symbol;Acc:MGI:1925544]
B cells	Ubb	0	1.03795	0.943	0.865	0	ubiquitin B [Source:MGI Symbol;Acc:MGI:98888]
B cells	Rpl26	0	0.51048	0.982	0.994	0	ribosomal protein L26 [Source:MGI Symbol;Acc:MGI:106022]
B cells	Pfn1	0	0.498448	0.967	0.967	0	profilin 1 [Source:MGI Symbol;Acc:MGI:97549]
B cells	Rpl23	0	0.337853	0.992	0.997	0	ribosomal protein L23 [Source:MGI Symbol;Acc:MGI:1929455]
B cells	Rpl19	0	0.441992	0.989	0.996	0	ribosomal protein L19 [Source:MGI Symbol;Acc:MGI:98020]
B cells	Rpl38	0	0.277068	0.987	0.997	0	ribosomal protein L38 [Source:MGI Symbol;Acc:MGI:1914921]
B cells	H3f3b	0	0.577957	0.953	0.927	0	H3.3 histone B [Source:MGI Symbol;Acc:MGI:1101768]
B cells	Rps7	0	0.640807	0.988	0.993	0	ribosomal protein S7 [Source:MGI Symbol;Acc:MGI:1333818]
B cells	Rps29	0	0.317364	0.997	0.999	0	ribosomal protein S29 [Source:MGI Symbol;Acc:MGI:107681]
B cells	Rps23	0	0.380147	0.99	0.996	0	ribosomal protein S23 [Source:MGI Symbol;Acc:MGI:1913725]
B cells	Rpl15	0	0.731245	0.972	0.979	0	ribosomal protein L15 [Source:MGI Symbol;Acc:MGI:1913730]
B cells	Rps24	0	0.366712	0.997	0.999	0	ribosomal protein S24 [Source:MGI Symbol;Acc:MGI:98147]
B cells	Tpt1	0	0.463899	0.993	0.999	0	tumor protein, translationally-controlled 1 [Source:MGI Symbol;Acc:MGI:104890]
B cells	Rpl37	0	0.352843	0.989	0.995	0	ribosomal protein L37 [Source:MGI Symbol;Acc:MGI:1914531]
B cells	Rpl30	0	0.353727	0.989	0.996	0	ribosomal protein L30 [Source:MGI Symbol;Acc:MGI:98037]
B cells	Ly6d	0	0.553883	0.965	0.955	0	lymphocyte antigen 6 complex, locus D [Source:MGI Symbol;Acc:MGI:96881]
B cells	Rpl8	0	0.508329	0.985	0.996	0	ribosomal protein L8 [Source:MGI Symbol;Acc:MGI:1350927]
B cells	Rpl3	0	0.458655	0.98	0.987	0	ribosomal protein L3 [Source:MGI Symbol;Acc:MGI:1351605]
B cells	Rpl24	0	0.506998	0.973	0.983	0	ribosomal protein L24 [Source:MGI Symbol;Acc:MGI:1915443]
B cells	Rps2	0	0.528661	0.977	0.985	0	ribosomal protein S2 [Source:MGI Symbol;Acc:MGI:105110]
B cells	Rps10	0	0.411454	0.989	0.996	0	ribosomal protein S10 [Source:MGI Symbol;Acc:MGI:1914347]
B cells	Rpl10a	0	0.461638	0.975	0.988	0	ribosomal protein L10A [Source:MGI Symbol;Acc:MGI:1343877]
B cells	Rps18	0	0.725934	0.988	0.993	0	ribosomal protein S18 [Source:MGI Symbol;Acc:MGI:98146]
B cells	H2-Ab1	0	0.543173	0.995	0.996	0	histocompatibility 2, class II antigen A, beta 1 [Source:MGI Symbol;Acc:MGI:103070]
B cells	H2-Aa	0	0.528244	0.995	0.998	0	histocompatibility 2, class II antigen A, alpha [Source:MGI Symbol;Acc:MGI:95895]
B cells	H2-Eb1	0	0.713058	0.993	0.994	0	histocompatibility 2, class II antigen E beta [Source:MGI Symbol;Acc:MGI:95901]
B cells	H2-D1	0	0.448046	0.993	0.993	0	histocompatibility 2, D region locus 1 [Source:MGI Symbol;Acc:MGI:95896]
B cells	AY036118	0	0.931689	0.86	0.619	0	NA
B cells	Rpl36	0	0.518998	0.979	0.991	0	ribosomal protein L36 [Source:MGI Symbol;Acc:MGI:1860603]
B cells	Cd74	0	0.475192	1	0.999	0	CD74 antigen (invariant polypeptide of major histocompatibility complex, class II antigen-associated) [Source:MGI Symbol;Acc:MGI:96534]
B cells	Rpl17	0	0.446821	0.99	0.997	0	ribosomal protein L17 [Source:MGI Symbol;Acc:MGI:2448270]
B cells	Malat1	0	0.299378	0.999	1	0	metastasis associated lung adenocarcinoma transcript 1 (non-coding RNA) [Source:MGI Symbol;Acc:MGI:1919539]
B cells	Fau	0	0.453762	0.993	0.998	0	Finkel-Biskis-Reilly murine sarcoma virus (FBR-MuSV) ubiquitously expressed (fox derived) [Source:MGI Symbol;Acc:MGI:102547]
B cells	Rbm3	0	0.724313	0.902	0.817	0	RNA binding motif (RNP1, RRM) protein 3 [Source:MGI Symbol;Acc:MGI:1099460]
B cells	Rpl39	0	0.481188	0.991	0.994	0	ribosomal protein L39 [Source:MGI Symbol;Acc:MGI:1914498]
B cells	Rpl10	0	0.716159	0.972	0.982	0	ribosomal protein L10 [Source:MGI Symbol;Acc:MGI:105943]
B cells	Rps4x	0	0.553028	0.985	0.992	0	ribosomal protein S4, X-linked [Source:MGI Symbol;Acc:MGI:98158]
B cells	Tmsb4x	0	0.378438	0.999	0.999	0	thymosin, beta 4, X chromosome [Source:MGI Symbol;Acc:MGI:99510]
B cells	Rps19	2.53e-301	0.304021	0.991	0.996	4.08e-297	ribosomal protein S19 [Source:MGI Symbol;Acc:MGI:1333780]
B cells	Rps28	1.65e-296	0.207984	0.985	0.996	2.66e-292	ribosomal protein S28 [Source:MGI Symbol;Acc:MGI:1859516]
B cells	Sh3bgrl3	1.25e-291	0.53288	0.951	0.936	2.03e-287	SH3 domain binding glutamic acid-rich protein-like 3 [Source:MGI Symbol;Acc:MGI:1920973]
B cells	Actb	1.74e-288	0.274916	0.996	0.999	2.81e-284	actin, beta [Source:MGI Symbol;Acc:MGI:87904]
B cells	Rpl7	1.94e-287	0.318367	0.978	0.992	3.13e-283	ribosomal protein L7 [Source:MGI Symbol;Acc:MGI:98073]
B cells	Naca	1.26e-285	0.455247	0.932	0.947	2.03e-281	nascent polypeptide-associated complex alpha polypeptide [Source:MGI Symbol;Acc:MGI:106095]
B cells	Cyba	3.93e-281	0.608523	0.94	0.894	6.35e-277	cytochrome b-245, alpha polypeptide [Source:MGI Symbol;Acc:MGI:1316658]
B cells	Rpl13a	1.24e-280	0.307248	0.992	0.998	2e-276	ribosomal protein L13A [Source:MGI Symbol;Acc:MGI:1351455]
B cells	Nme2	1.52e-276	0.646708	0.863	0.771	2.45e-272	NME/NM23 nucleoside diphosphate kinase 2 [Source:MGI Symbol;Acc:MGI:97356]
B cells	Rack1	2.11e-272	0.271595	0.982	0.992	3.41e-268	receptor for activated C kinase 1 [Source:MGI Symbol;Acc:MGI:101849]
B cells	Cd37	4.91e-271	0.360542	0.988	0.981	7.93e-267	CD37 antigen [Source:MGI Symbol;Acc:MGI:88330]
B cells	Ftl1	2.56e-269	0.571961	0.91	0.851	4.14e-265	ferritin light polypeptide 1 [Source:MGI Symbol;Acc:MGI:95589]
B cells	Gm10076	2.78e-267	0.233485	0.954	0.975	4.5e-263	predicted gene 10076 [Source:MGI Symbol;Acc:MGI:3704451]
B cells	Rps14	2.9e-266	0.252074	0.987	0.997	4.68e-262	ribosomal protein S14 [Source:MGI Symbol;Acc:MGI:98107]
B cells	Rps8	5.71e-260	0.216907	0.992	0.998	9.23e-256	ribosomal protein S8 [Source:MGI Symbol;Acc:MGI:98166]
B cells	Rps25	6.9e-260	0.261509	0.978	0.989	1.11e-255	ribosomal protein S25 [Source:MGI Symbol;Acc:MGI:1922867]
B cells	Rpl35a	4.73e-255	0.221435	0.99	0.997	7.65e-251	ribosomal protein L35A [Source:MGI Symbol;Acc:MGI:1928894]
B cells	Fth1	2.05e-253	0.403539	0.967	0.969	3.31e-249	ferritin heavy polypeptide 1 [Source:MGI Symbol;Acc:MGI:95588]
B cells	Rplp1	8.83e-253	0.187345	0.994	0.999	1.43e-248	ribosomal protein, large, P1 [Source:MGI Symbol;Acc:MGI:1927099]
B cells	Rpl27	4.3e-251	0.272211	0.976	0.991	6.94e-247	ribosomal protein L27 [Source:MGI Symbol;Acc:MGI:98036]
B cells	Rpl7a	2.82e-250	0.329297	0.965	0.979	4.55e-246	ribosomal protein L7A [Source:MGI Symbol;Acc:MGI:1353472]
B cells	Gm31243	2.6e-248	0.61813	0.694	0.48	4.2e-244	predicted gene, 31243 [Source:MGI Symbol;Acc:MGI:5590402]
B cells	Ebf1	7.76e-247	0.376211	0.95	0.921	1.25e-242	early B cell factor 1 [Source:MGI Symbol;Acc:MGI:95275]
B cells	Rpl36a	3.03e-239	0.270065	0.976	0.987	4.89e-235	ribosomal protein L36A [Source:MGI Symbol;Acc:MGI:1201789]
B cells	Rpl5	1.21e-237	0.220594	0.984	0.992	1.96e-233	ribosomal protein L5 [Source:MGI Symbol;Acc:MGI:102854]
B cells	Ppib	1.14e-236	0.605931	0.79	0.6	1.84e-232	peptidylprolyl isomerase B [Source:MGI Symbol;Acc:MGI:97750]
B cells	Eif1	4.57e-235	0.282409	0.963	0.98	7.38e-231	eukaryotic translation initiation factor 1 [Source:MGI Symbol;Acc:MGI:105125]
B cells	Psmb8	3.47e-234	0.522984	0.858	0.767	5.6e-230	proteasome (prosome, macropain) subunit, beta type 8 (large multifunctional peptidase 7) [Source:MGI Symbol;Acc:MGI:1346527]
B cells	Gapdh	4.29e-234	0.527135	0.864	0.797	6.93e-230	glyceraldehyde-3-phosphate dehydrogenase [Source:MGI Symbol;Acc:MGI:95640]
B cells	Rps26	2.83e-224	0.168647	0.987	0.996	4.57e-220	ribosomal protein S26 [Source:MGI Symbol;Acc:MGI:1351628]
B cells	Eef1b2	1.68e-220	0.287704	0.959	0.973	2.71e-216	eukaryotic translation elongation factor 1 beta 2 [Source:MGI Symbol;Acc:MGI:1929520]
B cells	Rpl22	1.75e-217	0.204412	0.977	0.99	2.83e-213	ribosomal protein L22 [Source:MGI Symbol;Acc:MGI:99262]
B cells	Rpl29	1.83e-217	0.526934	0.558	0.39	2.96e-213	ribosomal protein L29 [Source:MGI Symbol;Acc:MGI:99687]
B cells	Clic1	1.46e-216	0.53186	0.846	0.71	2.36e-212	chloride intracellular channel 1 [Source:MGI Symbol;Acc:MGI:2148924]
B cells	Cd79b	3.1e-216	0.286925	0.985	0.982	5e-212	CD79B antigen [Source:MGI Symbol;Acc:MGI:96431]
B cells	Cox8a	5.46e-215	0.47968	0.869	0.821	8.82e-211	cytochrome c oxidase subunit 8A [Source:MGI Symbol;Acc:MGI:105959]
B cells	Iglc3	3.07e-214	0.420351	0.932	0.911	4.96e-210	immunoglobulin lambda constant 3 [Source:MGI Symbol;Acc:MGI:99886]
B cells	Rplp2	2e-213	0.0997303	0.992	0.998	3.23e-209	ribosomal protein, large P2 [Source:MGI Symbol;Acc:MGI:1914436]
B cells	Ptma	1.87e-211	0.391205	0.977	0.968	3.02e-207	prothymosin alpha [Source:MGI Symbol;Acc:MGI:97803]
B cells	Rps9	1.6e-208	0.133711	0.99	0.998	2.59e-204	ribosomal protein S9 [Source:MGI Symbol;Acc:MGI:1924096]
B cells	Btf3	8.49e-206	0.377237	0.909	0.905	1.37e-201	basic transcription factor 3 [Source:MGI Symbol;Acc:MGI:1202875]
B cells	Rps6	3.53e-204	0.211022	0.976	0.992	5.71e-200	ribosomal protein S6 [Source:MGI Symbol;Acc:MGI:98159]
B cells	Rpl22l1	2.22e-195	0.385756	0.867	0.851	3.59e-191	ribosomal protein L22 like 1 [Source:MGI Symbol;Acc:MGI:1915278]
B cells	Jund	3.83e-192	0.441605	0.807	0.74	6.19e-188	jun D proto-oncogene [Source:MGI Symbol;Acc:MGI:96648]
B cells	Rpl37a	2e-191	0.0396776	0.994	0.999	3.23e-187	ribosomal protein L37a [Source:MGI Symbol;Acc:MGI:98068]
B cells	Ifi30	4.77e-191	0.531126	0.826	0.748	7.71e-187	interferon gamma inducible protein 30 [Source:MGI Symbol;Acc:MGI:2137648]
B cells	Sec61g	7.58e-190	0.476494	0.798	0.69	1.22e-185	SEC61, gamma subunit [Source:MGI Symbol;Acc:MGI:1202066]
B cells	Iglc2	1.03e-189	0.361019	0.959	0.954	1.67e-185	immunoglobulin lambda constant 2 [Source:MGI Symbol;Acc:MGI:99547]
B cells	Pfdn5	9.02e-184	0.375497	0.875	0.863	1.46e-179	prefoldin 5 [Source:MGI Symbol;Acc:MGI:1928753]
B cells	Elob	3.82e-183	0.529912	0.752	0.606	6.18e-179	elongin B [Source:MGI Symbol;Acc:MGI:1914923]
B cells	Rpl36al	1.7e-180	0.317391	0.938	0.934	2.75e-176	ribosomal protein L36A-like [Source:MGI Symbol;Acc:MGI:1913733]
B cells	H2-DMa	3.15e-177	0.435654	0.89	0.824	5.09e-173	histocompatibility 2, class II, locus DMa [Source:MGI Symbol;Acc:MGI:95921]
B cells	Snrpd2	1.51e-175	0.538803	0.773	0.608	2.44e-171	small nuclear ribonucleoprotein D2 [Source:MGI Symbol;Acc:MGI:98345]
B cells	Rps12	5.21e-174	0.066676	0.993	0.999	8.42e-170	ribosomal protein S12 [Source:MGI Symbol;Acc:MGI:98105]
B cells	Pold4	1.6e-172	0.474591	0.724	0.63	2.58e-168	polymerase (DNA-directed), delta 4 [Source:MGI Symbol;Acc:MGI:1916995]
B cells	Ptprcap	5.85e-172	0.428527	0.946	0.92	9.45e-168	protein tyrosine phosphatase, receptor type, C polypeptide-associated protein [Source:MGI Symbol;Acc:MGI:97811]
B cells	Srgn	4.06e-170	0.459977	0.891	0.836	6.56e-166	serglycin [Source:MGI Symbol;Acc:MGI:97756]
B cells	Oaz1	6.62e-168	0.316808	0.928	0.915	1.07e-163	ornithine decarboxylase antizyme 1 [Source:MGI Symbol;Acc:MGI:109433]
B cells	Rpl4	7.76e-165	0.183704	0.969	0.979	1.25e-160	ribosomal protein L4 [Source:MGI Symbol;Acc:MGI:1915141]
B cells	Rpl41	2.63e-164	0.0693995	0.992	0.997	4.26e-160	ribosomal protein L41 [Source:MGI Symbol;Acc:MGI:1915195]
B cells	Cfl1	1.08e-163	0.276904	0.928	0.933	1.74e-159	cofilin 1, non-muscle [Source:MGI Symbol;Acc:MGI:101757]
B cells	Atp5g2	7.07e-163	0.364758	0.869	0.836	1.14e-158	ATP synthase, H+ transporting, mitochondrial F0 complex, subunit C2 (subunit 9) [Source:MGI Symbol;Acc:MGI:1915192]
B cells	Eif3h	9.87e-163	0.415595	0.764	0.689	1.59e-158	eukaryotic translation initiation factor 3, subunit H [Source:MGI Symbol;Acc:MGI:1915385]
B cells	Arpc3	3.08e-162	0.441695	0.812	0.708	4.98e-158	actin related protein 2/3 complex, subunit 3 [Source:MGI Symbol;Acc:MGI:1928375]
B cells	Iglc1	1.32e-161	0.767122	0.693	0.59	2.13e-157	immunoglobulin lambda constant 1 [Source:MGI Symbol;Acc:MGI:99546]
B cells	Itm2b	6.56e-159	0.378685	0.881	0.822	1.06e-154	integral membrane protein 2B [Source:MGI Symbol;Acc:MGI:1309517]
B cells	Atp5e	1.64e-158	0.302432	0.912	0.914	2.65e-154	ATP synthase, H+ transporting, mitochondrial F1 complex, epsilon subunit [Source:MGI Symbol;Acc:MGI:1855697]
B cells	H2-DMb2	5.66e-158	0.352948	0.912	0.887	9.15e-154	histocompatibility 2, class II, locus Mb2 [Source:MGI Symbol;Acc:MGI:95923]
B cells	Ddx5	5.52e-156	0.0961633	0.99	0.992	8.92e-152	DEAD box helicase 5 [Source:MGI Symbol;Acc:MGI:105037]
B cells	Snrpg	8.54e-156	0.344994	0.888	0.868	1.38e-151	small nuclear ribonucleoprotein polypeptide G [Source:MGI Symbol;Acc:MGI:1915261]
B cells	Coro1a	9.63e-156	0.248853	0.97	0.973	1.56e-151	coronin, actin binding protein 1A [Source:MGI Symbol;Acc:MGI:1345961]
B cells	Rac2	9.3e-153	0.302863	0.91	0.906	1.5e-148	Rac family small GTPase 2 [Source:MGI Symbol;Acc:MGI:97846]
B cells	mt-Nd1	1.02e-149	0.0860131	0.996	0.999	1.64e-145	mitochondrially encoded NADH dehydrogenase 1 [Source:MGI Symbol;Acc:MGI:101787]
B cells	Calm1	4.34e-149	0.357919	0.912	0.9	7.01e-145	calmodulin 1 [Source:MGI Symbol;Acc:MGI:88251]
B cells	Ltb	6.29e-148	0.372541	0.923	0.896	1.02e-143	lymphotoxin B [Source:MGI Symbol;Acc:MGI:104796]
B cells	Cox6c	1.62e-147	0.393526	0.847	0.771	2.62e-143	cytochrome c oxidase subunit 6C [Source:MGI Symbol;Acc:MGI:104614]
B cells	Rps15	3.22e-147	-0.0107453	0.985	0.997	5.2e-143	ribosomal protein S15 [Source:MGI Symbol;Acc:MGI:98117]
B cells	Crip1	4.61e-147	0.56648	0.821	0.775	7.45e-143	cysteine-rich protein 1 (intestinal) [Source:MGI Symbol;Acc:MGI:88501]
B cells	Ssr4	1.89e-144	0.492748	0.64	0.439	3.05e-140	signal sequence receptor, delta [Source:MGI Symbol;Acc:MGI:1099464]
B cells	Capg	1.47e-143	0.438486	0.693	0.593	2.37e-139	capping protein (actin filament), gelsolin-like [Source:MGI Symbol;Acc:MGI:1098259]
B cells	Lars2	8.96e-143	0.336551	0.958	0.957	1.45e-138	leucyl-tRNA synthetase, mitochondrial [Source:MGI Symbol;Acc:MGI:2142973]
B cells	Napsa	5.94e-142	0.309091	0.903	0.857	9.59e-138	napsin A aspartic peptidase [Source:MGI Symbol;Acc:MGI:109365]
B cells	Rpl31	1.2e-141	0.162043	0.952	0.964	1.93e-137	ribosomal protein L31 [Source:MGI Symbol;Acc:MGI:2149632]
B cells	Selenow	2.75e-138	0.433687	0.808	0.719	4.44e-134	selenoprotein W [Source:MGI Symbol;Acc:MGI:1100878]
B cells	Serf2	4.58e-138	0.265425	0.935	0.929	7.41e-134	small EDRK-rich factor 2 [Source:MGI Symbol;Acc:MGI:1337041]
B cells	Mzb1	5.63e-138	0.280398	0.836	0.834	9.09e-134	marginal zone B and B1 cell-specific protein 1 [Source:MGI Symbol;Acc:MGI:1917066]
B cells	S100a11	5.09e-137	0.459065	0.681	0.535	8.23e-133	S100 calcium binding protein A11 [Source:MGI Symbol;Acc:MGI:1338798]
B cells	Hmgb1	1.11e-134	0.321362	0.878	0.849	1.8e-130	high mobility group box 1 [Source:MGI Symbol;Acc:MGI:96113]
B cells	Plac8	2.37e-134	0.308519	0.852	0.854	3.83e-130	placenta-specific 8 [Source:MGI Symbol;Acc:MGI:2445289]
B cells	Btg1	3.05e-133	0.0303305	0.969	0.98	4.92e-129	BTG anti-proliferation factor 1 [Source:MGI Symbol;Acc:MGI:88215]
B cells	Ptpn18	8.04e-133	0.301473	0.867	0.855	1.3e-128	protein tyrosine phosphatase, non-receptor type 18 [Source:MGI Symbol;Acc:MGI:108410]
B cells	Sub1	1.12e-132	0.334639	0.868	0.826	1.81e-128	SUB1 homolog, transcriptional regulator [Source:MGI Symbol;Acc:MGI:104811]
B cells	Ctss	4.86e-131	0.323095	0.895	0.86	7.85e-127	cathepsin S [Source:MGI Symbol;Acc:MGI:107341]
B cells	Rps17	3.44e-130	0.0862429	0.965	0.984	5.55e-126	ribosomal protein S17 [Source:MGI Symbol;Acc:MGI:1309526]
B cells	Eif3f	7.21e-130	0.229098	0.878	0.872	1.17e-125	eukaryotic translation initiation factor 3, subunit F [Source:MGI Symbol;Acc:MGI:1913335]
B cells	Mef2c	1.38e-129	0.235794	0.934	0.914	2.22e-125	myocyte enhancer factor 2C [Source:MGI Symbol;Acc:MGI:99458]
B cells	Sumo2	2.76e-129	0.355719	0.791	0.716	4.46e-125	small ubiquitin-like modifier 2 [Source:MGI Symbol;Acc:MGI:2158813]
B cells	H2-K1	4.7e-129	0.0509048	0.998	0.999	7.59e-125	histocompatibility 2, K1, K region [Source:MGI Symbol;Acc:MGI:95904]
B cells	Ifi27l2a	7.36e-128	0.558066	0.657	0.502	1.19e-123	interferon, alpha-inducible protein 27 like 2A [Source:MGI Symbol;Acc:MGI:1924183]
B cells	Cox5b	1.98e-127	0.41217	0.723	0.606	3.19e-123	cytochrome c oxidase subunit 5B [Source:MGI Symbol;Acc:MGI:88475]
B cells	Gm11808	2.57e-126	0.386229	0.566	0.411	4.15e-122	predicted gene 11808 [Source:MGI Symbol;Acc:MGI:3649356]
B cells	Npm1	4.1e-126	0.141628	0.943	0.954	6.62e-122	nucleophosmin 1 [Source:MGI Symbol;Acc:MGI:106184]
B cells	Cox7c	6.46e-125	0.27959	0.886	0.855	1.04e-120	cytochrome c oxidase subunit 7C [Source:MGI Symbol;Acc:MGI:103226]
B cells	mt-Co3	1.02e-122	-0.100423	1	1	1.65e-118	mitochondrially encoded cytochrome c oxidase III [Source:MGI Symbol;Acc:MGI:102502]
B cells	Rpl23a	3.11e-119	-0.0354451	0.979	0.993	5.02e-115	ribosomal protein L23A [Source:MGI Symbol;Acc:MGI:3040672]
B cells	Arhgdib	1.73e-118	0.172418	0.934	0.949	2.79e-114	Rho, GDP dissociation inhibitor (GDI) beta [Source:MGI Symbol;Acc:MGI:101940]
B cells	Atp5g1	1.16e-117	0.447303	0.649	0.488	1.87e-113	ATP synthase, H+ transporting, mitochondrial F0 complex, subunit C1 (subunit 9) [Source:MGI Symbol;Acc:MGI:107653]
B cells	Hint1	3.6e-117	0.359414	0.801	0.746	5.82e-113	histidine triad nucleotide binding protein 1 [Source:MGI Symbol;Acc:MGI:1321133]
B cells	Arpc1b	2.73e-116	0.278248	0.841	0.807	4.42e-112	actin related protein 2/3 complex, subunit 1B [Source:MGI Symbol;Acc:MGI:1343142]
B cells	mt-Atp6	3.48e-116	-0.0721697	0.999	1	5.62e-112	mitochondrially encoded ATP synthase 6 [Source:MGI Symbol;Acc:MGI:99927]
B cells	Gng5	3.06e-115	0.354532	0.762	0.671	4.95e-111	guanine nucleotide binding protein (G protein), gamma 5 [Source:MGI Symbol;Acc:MGI:109164]
B cells	Fcmr	6.64e-115	0.384402	0.874	0.837	1.07e-110	Fc fragment of IgM receptor [Source:MGI Symbol;Acc:MGI:1916419]
B cells	Gas5	9.86e-115	0.198602	0.891	0.9	1.59e-110	growth arrest specific 5 [Source:MGI Symbol;Acc:MGI:95659]
B cells	mt-Cytb	1.24e-114	-0.0769569	0.998	1	2e-110	mitochondrially encoded cytochrome b [Source:MGI Symbol;Acc:MGI:102501]
B cells	Pgls	2.57e-113	0.368245	0.741	0.648	4.16e-109	6-phosphogluconolactonase [Source:MGI Symbol;Acc:MGI:1913421]
B cells	BE692007	1.21e-111	0.252393	0.809	0.77	1.95e-107	expressed sequence BE692007 [Source:MGI Symbol;Acc:MGI:3035348]
B cells	Eef1d	3.08e-111	0.293732	0.796	0.752	4.97e-107	eukaryotic translation elongation factor 1 delta (guanine nucleotide exchange protein) [Source:MGI Symbol;Acc:MGI:1913906]
B cells	Son	6.41e-111	0.237156	0.943	0.925	1.04e-106	Son DNA binding protein [Source:MGI Symbol;Acc:MGI:98353]
B cells	Rhoa	3.84e-110	0.281797	0.874	0.833	6.21e-106	ras homolog family member A [Source:MGI Symbol;Acc:MGI:1096342]
B cells	Clta	6.37e-110	0.324789	0.792	0.738	1.03e-105	clathrin, light polypeptide (Lca) [Source:MGI Symbol;Acc:MGI:894297]
B cells	Eif5a	1.21e-109	0.331801	0.751	0.697	1.96e-105	eukaryotic translation initiation factor 5A [Source:MGI Symbol;Acc:MGI:106248]
B cells	Atp5j2	1.66e-108	0.360934	0.742	0.643	2.68e-104	ATP synthase, H+ transporting, mitochondrial F0 complex, subunit F2 [Source:MGI Symbol;Acc:MGI:1927558]
B cells	Emp3	3.4e-108	0.520587	0.481	0.33	5.49e-104	epithelial membrane protein 3 [Source:MGI Symbol;Acc:MGI:1098729]
B cells	Cox4i1	3.56e-108	0.213239	0.923	0.91	5.75e-104	cytochrome c oxidase subunit 4I1 [Source:MGI Symbol;Acc:MGI:88473]
B cells	Arpc2	5.93e-108	0.249841	0.886	0.879	9.57e-104	actin related protein 2/3 complex, subunit 2 [Source:MGI Symbol;Acc:MGI:1923959]
B cells	Hnrnpa1	7.63e-108	0.321696	0.782	0.737	1.23e-103	heterogeneous nuclear ribonucleoprotein A1 [Source:MGI Symbol;Acc:MGI:104820]
B cells	Gimap6	9.27e-108	0.303161	0.797	0.712	1.5e-103	GTPase, IMAP family member 6 [Source:MGI Symbol;Acc:MGI:1918876]
B cells	Psme1	1.42e-107	0.271163	0.845	0.815	2.3e-103	proteasome (prosome, macropain) activator subunit 1 (PA28 alpha) [Source:MGI Symbol;Acc:MGI:1096367]
B cells	Eif3i	6.12e-107	0.351886	0.664	0.558	9.88e-103	eukaryotic translation initiation factor 3, subunit I [Source:MGI Symbol;Acc:MGI:1860763]
B cells	Aldoa	5.36e-106	0.396764	0.714	0.636	8.66e-102	aldolase A, fructose-bisphosphate [Source:MGI Symbol;Acc:MGI:87994]
B cells	Dad1	4.98e-105	0.376026	0.763	0.617	8.04e-101	defender against cell death 1 [Source:MGI Symbol;Acc:MGI:101912]
B cells	S100a10	7.67e-105	0.4387	0.636	0.531	1.24e-100	S100 calcium binding protein A10 (calpactin) [Source:MGI Symbol;Acc:MGI:1339468]
B cells	Eno1	5.97e-104	0.364689	0.614	0.486	9.65e-100	enolase 1, alpha non-neuron [Source:MGI Symbol;Acc:MGI:95393]
B cells	Ctsh	2.93e-101	0.288889	0.822	0.748	4.73e-97	cathepsin H [Source:MGI Symbol;Acc:MGI:107285]
B cells	Ndufa13	1.87e-99	0.358461	0.785	0.671	3.03e-95	NADH:ubiquinone oxidoreductase subunit A13 [Source:MGI Symbol;Acc:MGI:1914434]
B cells	Cox6b1	1.27e-98	0.320285	0.793	0.723	2.05e-94	cytochrome c oxidase, subunit 6B1 [Source:MGI Symbol;Acc:MGI:107460]
B cells	Atp5d	1.91e-98	0.334899	0.707	0.617	3.09e-94	ATP synthase, H+ transporting, mitochondrial F1 complex, delta subunit [Source:MGI Symbol;Acc:MGI:1913293]
B cells	Ly6e	7.89e-98	0.0382203	0.993	0.996	1.27e-93	lymphocyte antigen 6 complex, locus E [Source:MGI Symbol;Acc:MGI:106651]
B cells	Chchd2	2.11e-97	0.25795	0.866	0.84	3.41e-93	coiled-coil-helix-coiled-coil-helix domain containing 2 [Source:MGI Symbol;Acc:MGI:1261428]
B cells	Ly86	7.95e-96	0.209427	0.912	0.891	1.28e-91	lymphocyte antigen 86 [Source:MGI Symbol;Acc:MGI:1321404]
B cells	Cirbp	4.93e-95	0.385068	0.503	0.297	7.97e-91	cold inducible RNA binding protein [Source:MGI Symbol;Acc:MGI:893588]
B cells	Micos13	2.45e-94	0.351017	0.623	0.496	3.95e-90	mitochondrial contact site and cristae organizing system subunit 13 [Source:MGI Symbol;Acc:MGI:2442174]
B cells	Ly6a	9.18e-94	0.167018	0.85	0.86	1.48e-89	lymphocyte antigen 6 complex, locus A [Source:MGI Symbol;Acc:MGI:107527]
B cells	Eef2	2.07e-93	0.0527255	0.959	0.971	3.35e-89	eukaryotic translation elongation factor 2 [Source:MGI Symbol;Acc:MGI:95288]
B cells	Scand1	1.28e-92	0.32372	0.791	0.708	2.06e-88	SCAN domain-containing 1 [Source:MGI Symbol;Acc:MGI:1343132]
B cells	Ndufb1-ps	1.55e-91	0.233907	0.779	0.751	2.5e-87	NA
B cells	B2m	2.07e-91	0.0136267	0.99	0.996	3.35e-87	beta-2 microglobulin [Source:MGI Symbol;Acc:MGI:88127]
B cells	Park7	2.75e-91	0.363358	0.622	0.493	4.44e-87	Parkinson disease (autosomal recessive, early onset) 7 [Source:MGI Symbol;Acc:MGI:2135637]
B cells	Cox7b	5.32e-91	0.343277	0.616	0.519	8.59e-87	cytochrome c oxidase subunit 7B [Source:MGI Symbol;Acc:MGI:1913392]
B cells	Ybx1	6.77e-91	0.170083	0.893	0.907	1.09e-86	Y box protein 1 [Source:MGI Symbol;Acc:MGI:99146]
B cells	Ndufa7	2.13e-90	0.332579	0.667	0.553	3.44e-86	NADH:ubiquinone oxidoreductase subunit A7 [Source:MGI Symbol;Acc:MGI:1913666]
B cells	Sri	8.03e-90	0.356736	0.648	0.507	1.3e-85	sorcin [Source:MGI Symbol;Acc:MGI:98419]
B cells	Myl12b	2.77e-89	0.26189	0.709	0.675	4.47e-85	myosin, light chain 12B, regulatory [Source:MGI Symbol;Acc:MGI:107494]
B cells	Cd47	3.02e-89	0.272489	0.862	0.815	4.87e-85	CD47 antigen (Rh-related antigen, integrin-associated signal transducer) [Source:MGI Symbol;Acc:MGI:96617]
B cells	Ubl5	3.4e-89	0.28538	0.789	0.713	5.49e-85	ubiquitin-like 5 [Source:MGI Symbol;Acc:MGI:1913427]
B cells	Eif3k	1.01e-88	0.284928	0.781	0.75	1.63e-84	eukaryotic translation initiation factor 3, subunit K [Source:MGI Symbol;Acc:MGI:1921080]
B cells	mt-Nd2	1.18e-87	-0.038225	0.996	1	1.91e-83	mitochondrially encoded NADH dehydrogenase 2 [Source:MGI Symbol;Acc:MGI:102500]
B cells	Cox7a2l	1.45e-87	0.210625	0.768	0.762	2.35e-83	cytochrome c oxidase subunit 7A2 like [Source:MGI Symbol;Acc:MGI:106015]
B cells	Rbx1	1.58e-87	0.335829	0.722	0.601	2.55e-83	ring-box 1 [Source:MGI Symbol;Acc:MGI:1891829]
B cells	Klf2	1.77e-87	0.289938	0.611	0.548	2.87e-83	Kruppel-like factor 2 (lung) [Source:MGI Symbol;Acc:MGI:1342772]
B cells	Ost4	3.42e-86	0.326811	0.635	0.515	5.52e-82	oligosaccharyltransferase complex subunit 4 (non-catalytic) [Source:MGI Symbol;Acc:MGI:1914945]
B cells	Atp5c1	8.34e-86	0.307922	0.656	0.584	1.35e-81	ATP synthase, H+ transporting, mitochondrial F1 complex, gamma polypeptide 1 [Source:MGI Symbol;Acc:MGI:1261437]
B cells	Prdx1	1.86e-85	0.32242	0.709	0.618	3e-81	peroxiredoxin 1 [Source:MGI Symbol;Acc:MGI:99523]
B cells	Xrn2	2.47e-85	0.342698	0.63	0.494	3.99e-81	5'-3' exoribonuclease 2 [Source:MGI Symbol;Acc:MGI:894687]
B cells	H2-Oa	3.66e-85	0.257604	0.783	0.722	5.91e-81	histocompatibility 2, O region alpha locus [Source:MGI Symbol;Acc:MGI:95924]
B cells	Cox7a2	6.69e-85	0.320704	0.701	0.588	1.08e-80	cytochrome c oxidase subunit 7A2 [Source:MGI Symbol;Acc:MGI:1316715]
B cells	Ighm	1.19e-84	0.0282976	0.984	0.994	1.92e-80	immunoglobulin heavy constant mu [Source:MGI Symbol;Acc:MGI:96448]
B cells	Gnas	2.07e-84	0.135314	0.912	0.906	3.35e-80	GNAS (guanine nucleotide binding protein, alpha stimulating) complex locus [Source:MGI Symbol;Acc:MGI:95777]
B cells	Atp5j	1.3e-83	0.317344	0.703	0.603	2.11e-79	ATP synthase, H+ transporting, mitochondrial F0 complex, subunit F [Source:MGI Symbol;Acc:MGI:107777]
B cells	Psmb1	2.72e-83	0.265731	0.773	0.718	4.39e-79	proteasome (prosome, macropain) subunit, beta type 1 [Source:MGI Symbol;Acc:MGI:104884]
B cells	Mif	6.44e-83	0.388684	0.672	0.55	1.04e-78	macrophage migration inhibitory factor (glycosylation-inhibiting factor) [Source:MGI Symbol;Acc:MGI:96982]
B cells	Morf4l1	1.17e-82	0.22715	0.864	0.82	1.9e-78	mortality factor 4 like 1 [Source:MGI Symbol;Acc:MGI:1096551]
B cells	Srrm2	2.12e-82	0.154619	0.94	0.937	3.42e-78	serine/arginine repetitive matrix 2 [Source:MGI Symbol;Acc:MGI:1923206]
B cells	Erh	5.38e-81	0.366327	0.468	0.31	8.7e-77	ERH mRNA splicing and mitosis factor [Source:MGI Symbol;Acc:MGI:108089]
B cells	Krtcap2	5.82e-81	0.337636	0.598	0.449	9.41e-77	keratinocyte associated protein 2 [Source:MGI Symbol;Acc:MGI:1913309]
B cells	Nsa2	7.54e-81	0.156387	0.834	0.841	1.22e-76	NSA2 ribosome biogenesis homolog [Source:MGI Symbol;Acc:MGI:1913883]
B cells	Gnai2	3.27e-80	0.183726	0.886	0.876	5.28e-76	guanine nucleotide binding protein (G protein), alpha inhibiting 2 [Source:MGI Symbol;Acc:MGI:95772]
B cells	Edf1	1.64e-79	0.327508	0.642	0.529	2.65e-75	endothelial differentiation-related factor 1 [Source:MGI Symbol;Acc:MGI:1891227]
B cells	Ncl	3.25e-79	0.124845	0.906	0.919	5.24e-75	nucleolin [Source:MGI Symbol;Acc:MGI:97286]
B cells	H2-T23	3.33e-79	0.230372	0.874	0.837	5.38e-75	histocompatibility 2, T region locus 23 [Source:MGI Symbol;Acc:MGI:95957]
B cells	Limd2	6.37e-79	0.214724	0.768	0.751	1.03e-74	LIM domain containing 2 [Source:MGI Symbol;Acc:MGI:1915053]
B cells	Ndufa4	1.02e-77	0.300347	0.806	0.748	1.65e-73	Ndufa4, mitochondrial complex associated [Source:MGI Symbol;Acc:MGI:107686]
B cells	Cd2	1.71e-77	0.321419	0.551	0.469	2.77e-73	CD2 antigen [Source:MGI Symbol;Acc:MGI:88320]
B cells	Atp5b	1.83e-77	0.233529	0.793	0.731	2.96e-73	ATP synthase, H+ transporting mitochondrial F1 complex, beta subunit [Source:MGI Symbol;Acc:MGI:107801]
B cells	Ndufa11	5.17e-77	0.342274	0.527	0.367	8.35e-73	NADH:ubiquinone oxidoreductase subunit A11 [Source:MGI Symbol;Acc:MGI:1917125]
B cells	Taf10	8.98e-77	0.306417	0.671	0.566	1.45e-72	TATA-box binding protein associated factor 10 [Source:MGI Symbol;Acc:MGI:1346320]
B cells	Serbp1	2.47e-76	0.0952941	0.923	0.929	3.99e-72	serpine1 mRNA binding protein 1 [Source:MGI Symbol;Acc:MGI:1914120]
B cells	Hnrnpa3	3.43e-75	0.154056	0.928	0.922	5.55e-71	heterogeneous nuclear ribonucleoprotein A3 [Source:MGI Symbol;Acc:MGI:1917171]
B cells	Grcc10	9.51e-75	0.241324	0.799	0.755	1.54e-70	gene rich cluster, C10 gene [Source:MGI Symbol;Acc:MGI:1315201]
B cells	Hnrnpd	1.73e-74	0.282575	0.732	0.636	2.79e-70	heterogeneous nuclear ribonucleoprotein D [Source:MGI Symbol;Acc:MGI:101947]
B cells	Eif3m	1.78e-74	0.280362	0.674	0.576	2.88e-70	eukaryotic translation initiation factor 3, subunit M [Source:MGI Symbol;Acc:MGI:1351744]
B cells	Atp5h	1.31e-73	0.222505	0.849	0.814	2.12e-69	ATP synthase, H+ transporting, mitochondrial F0 complex, subunit D [Source:MGI Symbol;Acc:MGI:1918929]
B cells	Polr1d	1.77e-73	0.283147	0.683	0.607	2.86e-69	polymerase (RNA) I polypeptide D [Source:MGI Symbol;Acc:MGI:108403]
B cells	Msn	1.92e-73	0.22874	0.895	0.875	3.1e-69	moesin [Source:MGI Symbol;Acc:MGI:97167]
B cells	Arpc5l	5.49e-73	0.246389	0.769	0.719	8.87e-69	actin related protein 2/3 complex, subunit 5-like [Source:MGI Symbol;Acc:MGI:1921442]
B cells	Slc25a4	1.66e-72	0.295434	0.537	0.434	2.68e-68	solute carrier family 25 (mitochondrial carrier, adenine nucleotide translocator), member 4 [Source:MGI Symbol;Acc:MGI:1353495]
B cells	Srsf5	3.59e-72	0.188276	0.864	0.85	5.8e-68	serine and arginine-rich splicing factor 5 [Source:MGI Symbol;Acc:MGI:98287]
B cells	Atp5l	8.1e-72	0.164023	0.852	0.84	1.31e-67	ATP synthase, H+ transporting, mitochondrial F0 complex, subunit G [Source:MGI Symbol;Acc:MGI:1351597]
B cells	Myl6	1.6e-71	0.19672	0.881	0.878	2.59e-67	myosin, light polypeptide 6, alkali, smooth muscle and non-muscle [Source:MGI Symbol;Acc:MGI:109318]
B cells	Nedd8	2.05e-71	0.275853	0.683	0.604	3.31e-67	neural precursor cell expressed, developmentally down-regulated gene 8 [Source:MGI Symbol;Acc:MGI:97301]
B cells	Ppp1r11	8e-71	0.302879	0.577	0.434	1.29e-66	protein phosphatase 1, regulatory inhibitor subunit 11 [Source:MGI Symbol;Acc:MGI:1923747]
B cells	Uqcrb	2.14e-70	0.299966	0.569	0.43	3.46e-66	ubiquinol-cytochrome c reductase binding protein [Source:MGI Symbol;Acc:MGI:1914780]
B cells	Vim	2.88e-70	0.435824	0.426	0.36	4.66e-66	vimentin [Source:MGI Symbol;Acc:MGI:98932]
B cells	Gpx4	3.79e-70	0.291871	0.606	0.498	6.12e-66	glutathione peroxidase 4 [Source:MGI Symbol;Acc:MGI:104767]
B cells	Supt4a	1.42e-69	0.302251	0.569	0.44	2.3e-65	SPT4A, DSIF elongation factor subunit [Source:MGI Symbol;Acc:MGI:107416]
B cells	Psma2	1.52e-69	0.288714	0.616	0.506	2.46e-65	proteasome subunit alpha 2 [Source:MGI Symbol;Acc:MGI:104885]
B cells	Tpm3	4.2e-69	0.157516	0.878	0.886	6.79e-65	tropomyosin 3, gamma [Source:MGI Symbol;Acc:MGI:1890149]
B cells	Hsp90ab1	4.22e-69	-0.0226609	0.966	0.989	6.82e-65	heat shock protein 90 alpha (cytosolic), class B member 1 [Source:MGI Symbol;Acc:MGI:96247]
B cells	H2-Q4	5e-69	0.229542	0.763	0.684	8.09e-65	histocompatibility 2, Q region locus 4 [Source:MGI Symbol;Acc:MGI:95933]
B cells	Spcs2	7.57e-69	0.305687	0.63	0.487	1.22e-64	signal peptidase complex subunit 2 homolog (S. cerevisiae) [Source:MGI Symbol;Acc:MGI:1913874]
B cells	Cd69	2.06e-68	0.376751	0.357	0.213	3.32e-64	CD69 antigen [Source:MGI Symbol;Acc:MGI:88343]
B cells	Mndal	2.36e-68	0.161919	0.867	0.851	3.81e-64	myeloid nuclear differentiation antigen like [Source:MGI Symbol;Acc:MGI:3780953]
B cells	2022-09-01	2.94e-68	0.269179	0.623	0.536	4.76e-64	NA
B cells	Ms4a1	1.01e-67	0.00230703	0.979	0.986	1.63e-63	membrane-spanning 4-domains, subfamily A, member 1 [Source:MGI Symbol;Acc:MGI:88321]
B cells	Actg1	1.19e-67	-0.0303958	0.955	0.976	1.93e-63	actin, gamma, cytoplasmic 1 [Source:MGI Symbol;Acc:MGI:87906]
B cells	Shisa5	1.32e-67	0.0885251	0.934	0.929	2.14e-63	shisa family member 5 [Source:MGI Symbol;Acc:MGI:1915044]
B cells	mt-Co1	2.16e-67	-0.237752	0.999	1	3.49e-63	mitochondrially encoded cytochrome c oxidase I [Source:MGI Symbol;Acc:MGI:102504]
B cells	Unc93b1	3e-67	0.148013	0.917	0.901	4.84e-63	unc-93 homolog B1, TLR signaling regulator [Source:MGI Symbol;Acc:MGI:1859307]
B cells	Cox5a	8.46e-67	0.230379	0.719	0.66	1.37e-62	cytochrome c oxidase subunit 5A [Source:MGI Symbol;Acc:MGI:88474]
B cells	Lsm4	1.05e-66	0.286321	0.624	0.517	1.69e-62	LSM4 homolog, U6 small nuclear RNA and mRNA degradation associated [Source:MGI Symbol;Acc:MGI:1354692]
B cells	Gabarap	1.2e-66	0.18432	0.78	0.755	1.93e-62	gamma-aminobutyric acid receptor associated protein [Source:MGI Symbol;Acc:MGI:1861742]
B cells	Psmb3	1.41e-66	0.297605	0.59	0.468	2.28e-62	proteasome (prosome, macropain) subunit, beta type 3 [Source:MGI Symbol;Acc:MGI:1347014]
B cells	Gimap1	1.87e-66	0.194944	0.826	0.79	3.02e-62	GTPase, IMAP family member 1 [Source:MGI Symbol;Acc:MGI:109368]
B cells	4930523C07Rik	2.69e-66	0.204542	0.785	0.734	4.34e-62	RIKEN cDNA 4930523C07 gene [Source:MGI Symbol;Acc:MGI:1914897]
B cells	Nol7	2.93e-66	0.250526	0.756	0.714	4.73e-62	nucleolar protein 7 [Source:MGI Symbol;Acc:MGI:1917328]
B cells	Smim14	3.03e-66	0.239698	0.771	0.707	4.89e-62	small integral membrane protein 14 [Source:MGI Symbol;Acc:MGI:1915802]
B cells	Ubc	3.77e-66	0.195279	0.777	0.747	6.09e-62	ubiquitin C [Source:MGI Symbol;Acc:MGI:98889]
B cells	Tomm7	4.61e-66	0.233959	0.737	0.704	7.45e-62	translocase of outer mitochondrial membrane 7 [Source:MGI Symbol;Acc:MGI:1913419]
B cells	Atp6v1f	2.24e-65	0.247589	0.678	0.607	3.62e-61	ATPase, H+ transporting, lysosomal V1 subunit F [Source:MGI Symbol;Acc:MGI:1913394]
B cells	Lsp1	2.31e-65	0.189132	0.775	0.759	3.74e-61	lymphocyte specific 1 [Source:MGI Symbol;Acc:MGI:96832]
B cells	Arglu1	6.77e-65	0.19477	0.805	0.757	1.09e-60	arginine and glutamate rich 1 [Source:MGI Symbol;Acc:MGI:2442985]
B cells	Gm8369	7.45e-65	0.331641	0.576	0.444	1.2e-60	predicted gene 8369 [Source:MGI Symbol;Acc:MGI:3645380]
B cells	Psenen	7.57e-65	0.273155	0.636	0.519	1.22e-60	presenilin enhancer gamma secretase subunit [Source:MGI Symbol;Acc:MGI:1913590]
B cells	Erp29	1.01e-64	0.216436	0.761	0.741	1.63e-60	endoplasmic reticulum protein 29 [Source:MGI Symbol;Acc:MGI:1914647]
B cells	Atp6v0e	1.17e-64	0.276409	0.718	0.645	1.89e-60	ATPase, H+ transporting, lysosomal V0 subunit E [Source:MGI Symbol;Acc:MGI:1328318]
B cells	Sec61b	1.98e-64	0.197405	0.774	0.737	3.2e-60	Sec61 beta subunit [Source:MGI Symbol;Acc:MGI:1913462]
B cells	Snrpe	3.29e-64	0.201229	0.802	0.773	5.32e-60	small nuclear ribonucleoprotein E [Source:MGI Symbol;Acc:MGI:98346]
B cells	Ube2i	1.36e-63	0.260902	0.662	0.565	2.2e-59	ubiquitin-conjugating enzyme E2I [Source:MGI Symbol;Acc:MGI:107365]
B cells	Ighd	2.03e-63	0.287032	0.829	0.809	3.27e-59	immunoglobulin heavy constant delta [Source:MGI Symbol;Acc:MGI:96447]
B cells	Anp32b	2.84e-63	0.187938	0.79	0.757	4.6e-59	acidic (leucine-rich) nuclear phosphoprotein 32 family, member B [Source:MGI Symbol;Acc:MGI:1914878]
B cells	Akap13	2.96e-63	0.171568	0.858	0.823	4.78e-59	A kinase (PRKA) anchor protein 13 [Source:MGI Symbol;Acc:MGI:2676556]
B cells	Tspo	8.31e-63	0.288039	0.566	0.434	1.34e-58	translocator protein [Source:MGI Symbol;Acc:MGI:88222]
B cells	Psme2	8.39e-63	0.25572	0.66	0.612	1.36e-58	proteasome (prosome, macropain) activator subunit 2 (PA28 beta) [Source:MGI Symbol;Acc:MGI:1096365]
B cells	Sat1	1.04e-62	0.252419	0.597	0.51	1.67e-58	spermidine/spermine N1-acetyl transferase 1 [Source:MGI Symbol;Acc:MGI:98233]
B cells	Slc25a5	1.15e-62	0.172873	0.741	0.721	1.86e-58	solute carrier family 25 (mitochondrial carrier, adenine nucleotide translocator), member 5 [Source:MGI Symbol;Acc:MGI:1353496]
B cells	mt-Nd3	2.59e-62	-0.00367902	0.971	0.978	4.18e-58	mitochondrially encoded NADH dehydrogenase 3 [Source:MGI Symbol;Acc:MGI:102499]
B cells	Snrpf	1.02e-61	0.207577	0.779	0.731	1.65e-57	small nuclear ribonucleoprotein polypeptide F [Source:MGI Symbol;Acc:MGI:1917128]
B cells	Slc25a3	1.39e-61	0.0968983	0.848	0.855	2.24e-57	solute carrier family 25 (mitochondrial carrier, phosphate carrier), member 3 [Source:MGI Symbol;Acc:MGI:1353498]
B cells	S100a6	1.98e-61	0.799175	0.269	0.2	3.2e-57	S100 calcium binding protein A6 (calcyclin) [Source:MGI Symbol;Acc:MGI:1339467]
B cells	mt-Co2	2.74e-61	-0.201037	1	1	4.43e-57	mitochondrially encoded cytochrome c oxidase II [Source:MGI Symbol;Acc:MGI:102503]
B cells	Zcchc7	3.32e-61	0.191893	0.817	0.751	5.36e-57	zinc finger, CCHC domain containing 7 [Source:MGI Symbol;Acc:MGI:2442912]
B cells	Psmb2	3.53e-61	0.307152	0.446	0.288	5.71e-57	proteasome (prosome, macropain) subunit, beta type 2 [Source:MGI Symbol;Acc:MGI:1347045]
B cells	Blvrb	4.55e-61	0.323936	0.411	0.274	7.36e-57	biliverdin reductase B (flavin reductase (NADPH)) [Source:MGI Symbol;Acc:MGI:2385271]
B cells	Gm26740	1.72e-60	0.188604	0.708	0.645	2.78e-56	predicted gene, 26740 [Source:MGI Symbol;Acc:MGI:5477234]
B cells	Mrpl23	2.46e-60	0.273981	0.576	0.47	3.97e-56	mitochondrial ribosomal protein L23 [Source:MGI Symbol;Acc:MGI:1196612]
B cells	Foxp1	3.73e-60	0.0421462	0.931	0.929	6.02e-56	forkhead box P1 [Source:MGI Symbol;Acc:MGI:1914004]
B cells	Bcl2a1b	4.04e-60	0.353061	0.42	0.308	6.53e-56	B cell leukemia/lymphoma 2 related protein A1b [Source:MGI Symbol;Acc:MGI:1278326]
B cells	Selenof	7.01e-60	0.269213	0.585	0.458	1.13e-55	selenoprotein F [Source:MGI Symbol;Acc:MGI:1927947]
B cells	Trmt112	2e-58	0.260617	0.638	0.542	3.24e-54	tRNA methyltransferase 11-2 [Source:MGI Symbol;Acc:MGI:1914924]
B cells	Calm2	6.03e-58	0.248805	0.66	0.575	9.75e-54	calmodulin 2 [Source:MGI Symbol;Acc:MGI:103250]
B cells	Il2rg	9.3e-58	0.227056	0.642	0.566	1.5e-53	interleukin 2 receptor, gamma chain [Source:MGI Symbol;Acc:MGI:96551]
B cells	Serpinb1a	1.14e-57	0.309786	0.447	0.339	1.84e-53	serine (or cysteine) peptidase inhibitor, clade B, member 1a [Source:MGI Symbol;Acc:MGI:1913472]
B cells	Aimp1	4.31e-57	0.254264	0.543	0.454	6.97e-53	aminoacyl tRNA synthetase complex-interacting multifunctional protein 1 [Source:MGI Symbol;Acc:MGI:102774]
B cells	Cd48	4.62e-57	0.265204	0.582	0.457	7.46e-53	CD48 antigen [Source:MGI Symbol;Acc:MGI:88339]
B cells	Rabac1	6.04e-57	0.24463	0.656	0.555	9.76e-53	Rab acceptor 1 (prenylated) [Source:MGI Symbol;Acc:MGI:1201692]
B cells	Tmem243	1.1e-56	0.253711	0.636	0.548	1.77e-52	transmembrane protein 243, mitochondrial [Source:MGI Symbol;Acc:MGI:3606159]
B cells	Uqcr10	1.74e-56	0.268638	0.6	0.502	2.81e-52	ubiquinol-cytochrome c reductase, complex III subunit X [Source:MGI Symbol;Acc:MGI:1913402]
B cells	Set	3.29e-56	0.106963	0.877	0.874	5.31e-52	SET nuclear oncogene [Source:MGI Symbol;Acc:MGI:1860267]
B cells	Jun	3.97e-56	0.320863	0.409	0.315	6.41e-52	jun proto-oncogene [Source:MGI Symbol;Acc:MGI:96646]
B cells	Cst3	4.66e-56	0.268743	0.68	0.549	7.52e-52	cystatin C [Source:MGI Symbol;Acc:MGI:102519]
B cells	Ms4a4c	7.07e-56	0.317418	0.429	0.32	1.14e-51	membrane-spanning 4-domains, subfamily A, member 4C [Source:MGI Symbol;Acc:MGI:1927656]
B cells	Prelid1	1.39e-55	0.280704	0.557	0.461	2.25e-51	PRELI domain containing 1 [Source:MGI Symbol;Acc:MGI:1913744]
B cells	AC149090.1	1.89e-55	0.247598	0.691	0.62	3.06e-51	NA
B cells	Atp5md	3.17e-55	0.26443	0.58	0.462	5.13e-51	ATP synthase membrane subunit DAPIT [Source:MGI Symbol;Acc:MGI:1891435]
B cells	Rbm39	4.4e-55	0.0355973	0.963	0.966	7.11e-51	RNA binding motif protein 39 [Source:MGI Symbol;Acc:MGI:2157953]
B cells	Tmed9	4.58e-55	0.27271	0.573	0.442	7.4e-51	transmembrane p24 trafficking protein 9 [Source:MGI Symbol;Acc:MGI:1914761]
B cells	Psma3	5.51e-55	0.232725	0.687	0.61	8.9e-51	proteasome subunit alpha 3 [Source:MGI Symbol;Acc:MGI:104883]
B cells	Apobec3	5.77e-55	0.0256118	0.964	0.959	9.32e-51	apolipoprotein B mRNA editing enzyme, catalytic polypeptide 3 [Source:MGI Symbol;Acc:MGI:1933111]
B cells	Nfkbia	7.39e-55	0.227711	0.634	0.591	1.19e-50	nuclear factor of kappa light polypeptide gene enhancer in B cells inhibitor, alpha [Source:MGI Symbol;Acc:MGI:104741]
B cells	Gabarapl2	9.01e-55	0.258181	0.492	0.367	1.46e-50	gamma-aminobutyric acid (GABA) A receptor-associated protein-like 2 [Source:MGI Symbol;Acc:MGI:1890602]
B cells	Abracl	3.28e-54	0.266772	0.634	0.549	5.31e-50	ABRA C-terminal like [Source:MGI Symbol;Acc:MGI:1920362]
B cells	Uqcrh	7.18e-54	0.0111806	0.894	0.927	1.16e-49	ubiquinol-cytochrome c reductase hinge protein [Source:MGI Symbol;Acc:MGI:1913826]
B cells	Mrpl54	7.56e-54	0.280025	0.454	0.306	1.22e-49	mitochondrial ribosomal protein L54 [Source:MGI Symbol;Acc:MGI:1913297]
B cells	Mrpl52	7.74e-54	0.187927	0.752	0.725	1.25e-49	mitochondrial ribosomal protein L52 [Source:MGI Symbol;Acc:MGI:1916086]
B cells	Rnase6	1.28e-53	0.246603	0.637	0.535	2.06e-49	ribonuclease, RNase A family, 6 [Source:MGI Symbol;Acc:MGI:1925666]
B cells	2410006H16Rik	3.37e-53	0.139745	0.707	0.709	5.45e-49	RIKEN cDNA 2410006H16 gene [Source:MGI Symbol;Acc:MGI:1916471]
B cells	Ndufa12	7.73e-53	0.29103	0.411	0.267	1.25e-48	NADH:ubiquinone oxidoreductase subunit A12 [Source:MGI Symbol;Acc:MGI:1913664]
B cells	Mrps16	9.55e-53	0.249352	0.52	0.41	1.54e-48	mitochondrial ribosomal protein S16 [Source:MGI Symbol;Acc:MGI:1913492]
B cells	Rrbp1	1.59e-52	0.159164	0.776	0.744	2.57e-48	ribosome binding protein 1 [Source:MGI Symbol;Acc:MGI:1932395]
B cells	Arpp19	1.78e-52	0.23176	0.66	0.553	2.88e-48	cAMP-regulated phosphoprotein 19 [Source:MGI Symbol;Acc:MGI:1891691]
B cells	Psmb6	4.86e-52	0.248201	0.487	0.364	7.85e-48	proteasome (prosome, macropain) subunit, beta type 6 [Source:MGI Symbol;Acc:MGI:104880]
B cells	Rnasek	5.97e-52	0.250448	0.6	0.497	9.65e-48	ribonuclease, RNase K [Source:MGI Symbol;Acc:MGI:106369]
B cells	Lamtor2	1.09e-51	0.241658	0.566	0.459	1.76e-47	late endosomal/lysosomal adaptor, MAPK and MTOR activator 2 [Source:MGI Symbol;Acc:MGI:1932697]
B cells	Nme1	1.74e-51	0.224904	0.665	0.611	2.81e-47	NME/NM23 nucleoside diphosphate kinase 1 [Source:MGI Symbol;Acc:MGI:97355]
B cells	Ndufa3	2.26e-51	0.199506	0.674	0.612	3.65e-47	NADH:ubiquinone oxidoreductase subunit A3 [Source:MGI Symbol;Acc:MGI:1913341]
B cells	Gmfg	4.02e-51	0.186744	0.649	0.568	6.49e-47	glia maturation factor, gamma [Source:MGI Symbol;Acc:MGI:1927135]
B cells	S100a8	4.27e-51	-0.471075	0.693	0.856	6.9e-47	S100 calcium binding protein A8 (calgranulin A) [Source:MGI Symbol;Acc:MGI:88244]
B cells	Fkbp3	5.06e-51	0.244851	0.545	0.458	8.17e-47	FK506 binding protein 3 [Source:MGI Symbol;Acc:MGI:1353460]
B cells	Bank1	1.09e-50	0.0112617	0.915	0.929	1.76e-46	B cell scaffold protein with ankyrin repeats 1 [Source:MGI Symbol;Acc:MGI:2442120]
B cells	Psmd8	1.21e-50	0.261555	0.475	0.354	1.96e-46	proteasome (prosome, macropain) 26S subunit, non-ATPase, 8 [Source:MGI Symbol;Acc:MGI:1888669]
B cells	H2afj	1.27e-50	0.194787	0.74	0.723	2.05e-46	NA
B cells	Dpm1	1.49e-50	0.240619	0.46	0.331	2.41e-46	dolichol-phosphate (beta-D) mannosyltransferase 1 [Source:MGI Symbol;Acc:MGI:1330239]
B cells	Nop10	1.6e-50	0.224719	0.674	0.613	2.59e-46	NOP10 ribonucleoprotein [Source:MGI Symbol;Acc:MGI:1913431]
B cells	C130026I21Rik	1.84e-50	0.309504	0.401	0.274	2.97e-46	RIKEN cDNA C130026I21 gene [Source:MGI Symbol;Acc:MGI:3612702]
B cells	Churc1	2.34e-50	0.251492	0.478	0.346	3.78e-46	churchill domain containing 1 [Source:MGI Symbol;Acc:MGI:1923684]
B cells	Psmb9	2.7e-50	0.188011	0.759	0.706	4.37e-46	proteasome (prosome, macropain) subunit, beta type 9 (large multifunctional peptidase 2) [Source:MGI Symbol;Acc:MGI:1346526]
B cells	AW112010	3.6e-50	0.25253	0.598	0.506	5.81e-46	expressed sequence AW112010 [Source:MGI Symbol;Acc:MGI:2147706]
B cells	Junb	7.27e-50	0.220883	0.492	0.422	1.17e-45	jun B proto-oncogene [Source:MGI Symbol;Acc:MGI:96647]
B cells	Psma4	1.02e-49	0.245012	0.549	0.427	1.65e-45	proteasome subunit alpha 4 [Source:MGI Symbol;Acc:MGI:1347060]
B cells	Tpr	1.06e-49	0.139258	0.82	0.794	1.71e-45	translocated promoter region, nuclear basket protein [Source:MGI Symbol;Acc:MGI:1922066]
B cells	H2afz	1.17e-49	0.221703	0.727	0.68	1.89e-45	NA
B cells	Map1lc3b	1.61e-49	0.244042	0.54	0.444	2.6e-45	microtubule-associated protein 1 light chain 3 beta [Source:MGI Symbol;Acc:MGI:1914693]
B cells	Tmem134	1.62e-49	0.235886	0.593	0.491	2.62e-45	transmembrane protein 134 [Source:MGI Symbol;Acc:MGI:1914240]
B cells	Ndufb11	1.66e-49	0.225553	0.677	0.601	2.68e-45	NADH:ubiquinone oxidoreductase subunit B11 [Source:MGI Symbol;Acc:MGI:1349919]
B cells	Swap70	2.17e-49	0.128741	0.894	0.885	3.5e-45	SWA-70 protein [Source:MGI Symbol;Acc:MGI:1298390]
B cells	Fis1	3.38e-49	0.21706	0.659	0.592	5.46e-45	fission, mitochondrial 1 [Source:MGI Symbol;Acc:MGI:1913687]
B cells	Ccdc12	4.46e-49	0.230594	0.584	0.479	7.2e-45	coiled-coil domain containing 12 [Source:MGI Symbol;Acc:MGI:1919904]
B cells	H2-Ob	4.76e-49	0.139416	0.878	0.856	7.69e-45	histocompatibility 2, O region beta locus [Source:MGI Symbol;Acc:MGI:95925]
B cells	Il4i1	7.68e-49	0.388742	0.367	0.326	1.24e-44	interleukin 4 induced 1 [Source:MGI Symbol;Acc:MGI:109552]
B cells	Nt5c	1.36e-48	0.236368	0.49	0.373	2.2e-44	5',3'-nucleotidase, cytosolic [Source:MGI Symbol;Acc:MGI:1354954]
B cells	Cd81	3.51e-48	0.198217	0.632	0.587	5.68e-44	CD81 antigen [Source:MGI Symbol;Acc:MGI:1096398]
B cells	Txn1	4.45e-48	0.219225	0.606	0.534	7.2e-44	thioredoxin 1 [Source:MGI Symbol;Acc:MGI:98874]
B cells	Bax	6.84e-48	0.243355	0.48	0.356	1.11e-43	BCL2-associated X protein [Source:MGI Symbol;Acc:MGI:99702]
B cells	Sap18	1.48e-47	0.249465	0.41	0.269	2.4e-43	Sin3-associated polypeptide 18 [Source:MGI Symbol;Acc:MGI:1277978]
B cells	Eif3c	2.98e-47	0.200272	0.746	0.687	4.82e-43	eukaryotic translation initiation factor 3, subunit C [Source:MGI Symbol;Acc:MGI:1926966]
B cells	Ndufb5	6.36e-47	0.217763	0.599	0.517	1.03e-42	NADH:ubiquinone oxidoreductase subunit B5 [Source:MGI Symbol;Acc:MGI:1913296]
B cells	Eif4a1	7.43e-47	0.157642	0.699	0.673	1.2e-42	eukaryotic translation initiation factor 4A1 [Source:MGI Symbol;Acc:MGI:95303]
B cells	Ndufb4	1.05e-46	0.22124	0.512	0.402	1.7e-42	NADH:ubiquinone oxidoreductase subunit B4 [Source:MGI Symbol;Acc:MGI:1915444]
B cells	Psmb5	1.25e-46	0.231949	0.502	0.386	2.02e-42	proteasome (prosome, macropain) subunit, beta type 5 [Source:MGI Symbol;Acc:MGI:1194513]
B cells	Chmp2a	1.3e-46	0.230681	0.518	0.415	2.1e-42	charged multivesicular body protein 2A [Source:MGI Symbol;Acc:MGI:1916203]
B cells	Atp5f1	1.48e-46	0.15492	0.725	0.715	2.39e-42	NA
B cells	Sec11c	2.77e-46	0.189598	0.701	0.656	4.48e-42	SEC11 homolog C, signal peptidase complex subunit [Source:MGI Symbol;Acc:MGI:1913536]
B cells	Mrps14	4.17e-46	0.233441	0.486	0.375	6.73e-42	mitochondrial ribosomal protein S14 [Source:MGI Symbol;Acc:MGI:1928141]
B cells	Ndufb7	5.14e-46	0.230277	0.658	0.561	8.3e-42	NADH:ubiquinone oxidoreductase subunit B7 [Source:MGI Symbol;Acc:MGI:1914166]
B cells	Vdac2	5.83e-46	0.189815	0.572	0.524	9.42e-42	voltage-dependent anion channel 2 [Source:MGI Symbol;Acc:MGI:106915]
B cells	Fundc2	8.69e-46	0.247211	0.419	0.304	1.4e-41	FUN14 domain containing 2 [Source:MGI Symbol;Acc:MGI:1914641]
B cells	Ssu72	8.76e-46	0.236825	0.496	0.378	1.41e-41	Ssu72 RNA polymerase II CTD phosphatase homolog (yeast) [Source:MGI Symbol;Acc:MGI:1916241]
B cells	Rhoh	1.03e-45	0.181704	0.675	0.611	1.66e-41	ras homolog family member H [Source:MGI Symbol;Acc:MGI:1921984]
B cells	Cdc42	1.14e-45	0.0897106	0.872	0.871	1.84e-41	cell division cycle 42 [Source:MGI Symbol;Acc:MGI:106211]
B cells	Gng10	1.49e-45	0.223992	0.517	0.432	2.41e-41	guanine nucleotide binding protein (G protein), gamma 10 [Source:MGI Symbol;Acc:MGI:1336169]
B cells	Tln1	1.55e-45	0.146151	0.76	0.738	2.5e-41	talin 1 [Source:MGI Symbol;Acc:MGI:1099832]
B cells	Tmem14c	1.66e-45	0.233019	0.523	0.407	2.68e-41	transmembrane protein 14C [Source:MGI Symbol;Acc:MGI:1913404]
B cells	mt-Nd4	1.81e-45	-0.209779	0.997	1	2.93e-41	mitochondrially encoded NADH dehydrogenase 4 [Source:MGI Symbol;Acc:MGI:102498]
B cells	Fxyd5	2.29e-45	0.235891	0.505	0.436	3.7e-41	FXYD domain-containing ion transport regulator 5 [Source:MGI Symbol;Acc:MGI:1201785]
B cells	Arl6ip1	2.46e-45	0.202173	0.747	0.712	3.97e-41	ADP-ribosylation factor-like 6 interacting protein 1 [Source:MGI Symbol;Acc:MGI:1858943]
B cells	Ucp2	2.49e-45	0.0739171	0.739	0.755	4.02e-41	uncoupling protein 2 (mitochondrial, proton carrier) [Source:MGI Symbol;Acc:MGI:109354]
B cells	2022-03-02	3.08e-45	0.224771	0.516	0.406	4.98e-41	NA
B cells	Psmb10	3.35e-45	0.230824	0.523	0.424	5.41e-41	proteasome (prosome, macropain) subunit, beta type 10 [Source:MGI Symbol;Acc:MGI:1096380]
B cells	Atp5o	5.92e-45	0.228168	0.561	0.475	9.56e-41	ATP synthase, H+ transporting, mitochondrial F1 complex, O subunit [Source:MGI Symbol;Acc:MGI:106341]
B cells	Pycard	7.06e-45	0.274197	0.484	0.366	1.14e-40	PYD and CARD domain containing [Source:MGI Symbol;Acc:MGI:1931465]
B cells	Pomp	1.01e-44	0.228154	0.657	0.58	1.63e-40	proteasome maturation protein [Source:MGI Symbol;Acc:MGI:1913787]
B cells	Ezr	1.16e-44	0.187571	0.772	0.749	1.88e-40	ezrin [Source:MGI Symbol;Acc:MGI:98931]
B cells	Hmgn1	1.19e-44	0.182635	0.633	0.597	1.92e-40	high mobility group nucleosomal binding domain 1 [Source:MGI Symbol;Acc:MGI:96120]
B cells	Ndufs4	1.37e-44	0.246875	0.409	0.27	2.22e-40	NADH:ubiquinone oxidoreductase core subunit S4 [Source:MGI Symbol;Acc:MGI:1343135]
B cells	Lgals1	1.52e-44	0.479408	0.296	0.217	2.46e-40	lectin, galactose binding, soluble 1 [Source:MGI Symbol;Acc:MGI:96777]
B cells	Ifi203	1.62e-44	0.113135	0.821	0.815	2.62e-40	interferon activated gene 203 [Source:MGI Symbol;Acc:MGI:96428]
B cells	Cib1	1.69e-44	0.226209	0.495	0.405	2.74e-40	calcium and integrin binding 1 (calmyrin) [Source:MGI Symbol;Acc:MGI:1344418]
B cells	Ciita	1.86e-44	0.135822	0.846	0.818	3.01e-40	class II transactivator [Source:MGI Symbol;Acc:MGI:108445]
B cells	Smdt1	2.13e-44	0.230799	0.586	0.501	3.44e-40	single-pass membrane protein with aspartate rich tail 1 [Source:MGI Symbol;Acc:MGI:1916279]
B cells	Tma7	2.68e-44	0.131029	0.812	0.808	4.33e-40	translational machinery associated 7 [Source:MGI Symbol;Acc:MGI:1913417]
B cells	Ndufs8	2.93e-44	0.228801	0.447	0.322	4.73e-40	NADH:ubiquinone oxidoreductase core subunit S8 [Source:MGI Symbol;Acc:MGI:2385079]
B cells	Mcl1	3.83e-44	0.0448555	0.883	0.893	6.19e-40	myeloid cell leukemia sequence 1 [Source:MGI Symbol;Acc:MGI:101769]
B cells	Macf1	3.9e-44	0.108849	0.895	0.9	6.31e-40	microtubule-actin crosslinking factor 1 [Source:MGI Symbol;Acc:MGI:108559]
B cells	Snrpd1	4.44e-44	0.238168	0.475	0.355	7.18e-40	small nuclear ribonucleoprotein D1 [Source:MGI Symbol;Acc:MGI:98344]
B cells	Ppdpf	5.47e-44	0.201396	0.616	0.563	8.84e-40	pancreatic progenitor cell differentiation and proliferation factor [Source:MGI Symbol;Acc:MGI:1913746]
B cells	Selenok	1.23e-43	0.222824	0.559	0.449	1.99e-39	selenoprotein K [Source:MGI Symbol;Acc:MGI:1931466]
B cells	Rap1a	2.47e-43	0.181541	0.616	0.56	3.99e-39	RAS-related protein 1a [Source:MGI Symbol;Acc:MGI:97852]
B cells	Atp5k	2.59e-43	0.184754	0.634	0.569	4.18e-39	ATP synthase, H+ transporting, mitochondrial F1F0 complex, subunit E [Source:MGI Symbol;Acc:MGI:106636]
B cells	Timm10b	4.04e-43	0.22824	0.533	0.418	6.52e-39	translocase of inner mitochondrial membrane 10B [Source:MGI Symbol;Acc:MGI:1315196]
B cells	Psma7	6.59e-43	0.191014	0.709	0.663	1.06e-38	proteasome subunit alpha 7 [Source:MGI Symbol;Acc:MGI:1347070]
B cells	Brk1	7.38e-43	0.214419	0.614	0.533	1.19e-38	BRICK1, SCAR/WAVE actin-nucleating complex subunit [Source:MGI Symbol;Acc:MGI:1915406]
B cells	Mrps24	7.82e-43	0.230697	0.471	0.34	1.26e-38	mitochondrial ribosomal protein S24 [Source:MGI Symbol;Acc:MGI:1928142]
B cells	Ncf4	8.1e-43	0.215595	0.556	0.485	1.31e-38	neutrophil cytosolic factor 4 [Source:MGI Symbol;Acc:MGI:109186]
B cells	Tomm22	8.2e-43	0.22015	0.535	0.449	1.32e-38	translocase of outer mitochondrial membrane 22 [Source:MGI Symbol;Acc:MGI:2450248]
B cells	Rnaset2a	1.04e-42	0.224451	0.399	0.283	1.69e-38	ribonuclease T2A [Source:MGI Symbol;Acc:MGI:1915445]
B cells	Slfn2	1.89e-42	0.173471	0.648	0.617	3.06e-38	schlafen 2 [Source:MGI Symbol;Acc:MGI:1313258]
B cells	Pdcd10	2.14e-42	0.198243	0.526	0.441	3.46e-38	programmed cell death 10 [Source:MGI Symbol;Acc:MGI:1928396]
B cells	Ndfip1	2.16e-42	0.189522	0.602	0.543	3.48e-38	Nedd4 family interacting protein 1 [Source:MGI Symbol;Acc:MGI:1929601]
B cells	2022-09-07	3.13e-42	0.191046	0.636	0.587	5.05e-38	NA
B cells	D8Ertd738e	5.33e-42	0.205434	0.553	0.479	8.62e-38	DNA segment, Chr 8, ERATO Doi 738, expressed [Source:MGI Symbol;Acc:MGI:1289231]
B cells	Eif2s2	6.45e-42	0.143074	0.714	0.692	1.04e-37	eukaryotic translation initiation factor 2, subunit 2 (beta) [Source:MGI Symbol;Acc:MGI:1914454]
B cells	Smap2	1.15e-41	0.181569	0.65	0.603	1.86e-37	small ArfGAP 2 [Source:MGI Symbol;Acc:MGI:1917030]
B cells	Anp32a	1.15e-41	0.163815	0.7	0.679	1.86e-37	acidic (leucine-rich) nuclear phosphoprotein 32 family, member A [Source:MGI Symbol;Acc:MGI:108447]
B cells	Sell	1.19e-41	0.234159	0.591	0.522	1.93e-37	selectin, lymphocyte [Source:MGI Symbol;Acc:MGI:98279]
B cells	Ssbp1	1.43e-41	0.211962	0.506	0.403	2.31e-37	single-stranded DNA binding protein 1 [Source:MGI Symbol;Acc:MGI:1920040]
B cells	Bmyc	1.48e-41	0.234602	0.392	0.289	2.39e-37	brain expressed myelocytomatosis oncogene [Source:MGI Symbol;Acc:MGI:88184]
B cells	Srrm1	1.61e-41	0.186815	0.686	0.618	2.6e-37	serine/arginine repetitive matrix 1 [Source:MGI Symbol;Acc:MGI:1858303]
B cells	Siglecg	1.67e-41	0.0545195	0.807	0.793	2.69e-37	sialic acid binding Ig-like lectin G [Source:MGI Symbol;Acc:MGI:2443630]
B cells	Actr3	2.28e-41	0.0381811	0.919	0.931	3.69e-37	ARP3 actin-related protein 3 [Source:MGI Symbol;Acc:MGI:1921367]
B cells	Chmp4b	2.37e-41	0.205858	0.533	0.459	3.83e-37	charged multivesicular body protein 4B [Source:MGI Symbol;Acc:MGI:1922858]
B cells	Pkm	2.62e-41	0.225903	0.62	0.557	4.23e-37	pyruvate kinase, muscle [Source:MGI Symbol;Acc:MGI:97591]
B cells	Tspan32	3.49e-41	0.176593	0.67	0.597	5.65e-37	tetraspanin 32 [Source:MGI Symbol;Acc:MGI:1350360]
B cells	Tmem258	5.53e-41	0.226441	0.559	0.486	8.93e-37	transmembrane protein 258 [Source:MGI Symbol;Acc:MGI:1916288]
B cells	Sf3b1	6.3e-41	0.106902	0.85	0.828	1.02e-36	splicing factor 3b, subunit 1 [Source:MGI Symbol;Acc:MGI:1932339]
B cells	Reep5	8.89e-41	0.223271	0.547	0.456	1.44e-36	receptor accessory protein 5 [Source:MGI Symbol;Acc:MGI:1270152]
B cells	Ifi27	1.21e-40	0.240375	0.363	0.245	1.96e-36	interferon, alpha-inducible protein 27 [Source:MGI Symbol;Acc:MGI:1277180]
B cells	Cd38	1.22e-40	0.104879	0.782	0.766	1.98e-36	CD38 antigen [Source:MGI Symbol;Acc:MGI:107474]
B cells	Lyn	1.45e-40	0.11214	0.778	0.764	2.35e-36	LYN proto-oncogene, Src family tyrosine kinase [Source:MGI Symbol;Acc:MGI:96892]
B cells	Ktn1	1.62e-40	0.174753	0.649	0.595	2.61e-36	kinectin 1 [Source:MGI Symbol;Acc:MGI:109153]
B cells	Srsf11	1.62e-40	0.135962	0.792	0.746	2.61e-36	serine and arginine-rich splicing factor 11 [Source:MGI Symbol;Acc:MGI:1916457]
B cells	Vps28	2.11e-40	0.203183	0.478	0.381	3.41e-36	vacuolar protein sorting 28 [Source:MGI Symbol;Acc:MGI:1914164]
B cells	Cct2	3.72e-40	0.148514	0.651	0.612	6.01e-36	chaperonin containing Tcp1, subunit 2 (beta) [Source:MGI Symbol;Acc:MGI:107186]
B cells	Atp5mpl	4.12e-40	0.123783	0.715	0.677	6.66e-36	ATP synthase membrane subunit 6.8PL [Source:MGI Symbol;Acc:MGI:1917507]
B cells	Psmd4	4.18e-40	0.19546	0.504	0.423	6.76e-36	proteasome (prosome, macropain) 26S subunit, non-ATPase, 4 [Source:MGI Symbol;Acc:MGI:1201670]
B cells	Ralgps2	4.38e-40	0.0220838	0.86	0.867	7.07e-36	Ral GEF with PH domain and SH3 binding motif 2 [Source:MGI Symbol;Acc:MGI:1925505]
B cells	Nubp1	5.17e-40	0.241565	0.376	0.249	8.36e-36	nucleotide binding protein 1 [Source:MGI Symbol;Acc:MGI:1347073]
B cells	Grb2	9.74e-40	0.111867	0.819	0.822	1.57e-35	growth factor receptor bound protein 2 [Source:MGI Symbol;Acc:MGI:95805]
B cells	Sem1	1.05e-39	0.135448	0.824	0.813	1.7e-35	SEM1, 26S proteasome complex subunit [Source:MGI Symbol;Acc:MGI:109238]
B cells	Dnajc8	1.39e-39	0.202115	0.554	0.473	2.24e-35	DnaJ heat shock protein family (Hsp40) member C8 [Source:MGI Symbol;Acc:MGI:1915848]
B cells	Sys1	1.47e-39	0.200871	0.54	0.463	2.38e-35	SYS1 Golgi-localized integral membrane protein homolog (S. cerevisiae) [Source:MGI Symbol;Acc:MGI:1913710]
B cells	Bola2	1.64e-39	0.132797	0.691	0.665	2.64e-35	bolA-like 2 (E. coli) [Source:MGI Symbol;Acc:MGI:1913412]
B cells	Chrac1	3.75e-39	0.246614	0.357	0.222	6.06e-35	chromatin accessibility complex 1 [Source:MGI Symbol;Acc:MGI:2135796]
B cells	Mrpl30	4.6e-39	0.19297	0.485	0.42	7.43e-35	mitochondrial ribosomal protein L30 [Source:MGI Symbol;Acc:MGI:1333820]
B cells	Mrpl43	5.24e-39	0.20078	0.446	0.361	8.47e-35	mitochondrial ribosomal protein L43 [Source:MGI Symbol;Acc:MGI:2137229]
B cells	Psma5	5.58e-39	0.21905	0.447	0.336	9.01e-35	proteasome subunit alpha 5 [Source:MGI Symbol;Acc:MGI:1347009]
B cells	Uvrag	6.23e-39	0.168022	0.588	0.521	1.01e-34	UV radiation resistance associated gene [Source:MGI Symbol;Acc:MGI:1925860]
B cells	Mbnl1	7.21e-39	-0.0125851	0.955	0.963	1.16e-34	muscleblind like splicing factor 1 [Source:MGI Symbol;Acc:MGI:1928482]
B cells	Ubxn1	7.65e-39	0.190386	0.577	0.502	1.24e-34	UBX domain protein 1 [Source:MGI Symbol;Acc:MGI:1289301]
B cells	Aurkaip1	7.85e-39	0.214423	0.435	0.329	1.27e-34	aurora kinase A interacting protein 1 [Source:MGI Symbol;Acc:MGI:1913327]
B cells	Dnaja1	8.29e-39	-0.513768	0.638	0.807	1.34e-34	DnaJ heat shock protein family (Hsp40) member A1 [Source:MGI Symbol;Acc:MGI:1270129]
B cells	Crlf2	9.13e-39	0.217849	0.407	0.281	1.48e-34	cytokine receptor-like factor 2 [Source:MGI Symbol;Acc:MGI:1889506]
B cells	Sec11a	1.6e-38	0.193676	0.463	0.35	2.58e-34	SEC11 homolog A, signal peptidase complex subunit [Source:MGI Symbol;Acc:MGI:1929464]
B cells	Dpm3	1.69e-38	0.197022	0.495	0.388	2.74e-34	dolichyl-phosphate mannosyltransferase polypeptide 3 [Source:MGI Symbol;Acc:MGI:1915813]
B cells	Taf1d	1.75e-38	0.144282	0.62	0.586	2.83e-34	TATA-box binding protein associated factor, RNA polymerase I, D [Source:MGI Symbol;Acc:MGI:1922566]
B cells	Ndufs5	1.95e-38	0.20126	0.508	0.405	3.15e-34	NADH:ubiquinone oxidoreductase core subunit S5 [Source:MGI Symbol;Acc:MGI:1890889]
B cells	Ndufb8	2.48e-38	0.212202	0.501	0.408	4.01e-34	NADH:ubiquinone oxidoreductase subunit B8 [Source:MGI Symbol;Acc:MGI:1914514]
B cells	Tsc22d3	2.78e-38	0.213567	0.381	0.291	4.49e-34	TSC22 domain family, member 3 [Source:MGI Symbol;Acc:MGI:1196284]
B cells	Ran	3.65e-38	0.132242	0.671	0.651	5.9e-34	RAN, member RAS oncogene family [Source:MGI Symbol;Acc:MGI:1333112]
B cells	Ostf1	3.67e-38	0.184716	0.604	0.53	5.92e-34	osteoclast stimulating factor 1 [Source:MGI Symbol;Acc:MGI:700012]
B cells	Eef1g	4.29e-38	-0.0654818	0.928	0.947	6.92e-34	eukaryotic translation elongation factor 1 gamma [Source:MGI Symbol;Acc:MGI:1914410]
B cells	Clk1	5.69e-38	0.0667191	0.807	0.803	9.2e-34	CDC-like kinase 1 [Source:MGI Symbol;Acc:MGI:107403]
B cells	Camp	9.51e-38	-0.435665	0.326	0.548	1.54e-33	cathelicidin antimicrobial peptide [Source:MGI Symbol;Acc:MGI:108443]
B cells	Gm43305	9.56e-38	0.134398	0.466	0.4	1.54e-33	predicted gene 43305 [Source:MGI Symbol;Acc:MGI:5663442]
B cells	Gpx1	1.1e-37	0.0929954	0.761	0.779	1.78e-33	glutathione peroxidase 1 [Source:MGI Symbol;Acc:MGI:104887]
B cells	Mettl23	1.64e-37	0.2023	0.555	0.461	2.64e-33	methyltransferase like 23 [Source:MGI Symbol;Acc:MGI:1921569]
B cells	Filip1l	1.67e-37	0.122432	0.759	0.719	2.7e-33	filamin A interacting protein 1-like [Source:MGI Symbol;Acc:MGI:1925999]
B cells	Cd55	1.68e-37	0.222126	0.561	0.492	2.71e-33	CD55 molecule, decay accelerating factor for complement [Source:MGI Symbol;Acc:MGI:104850]
B cells	Prrc2c	1.96e-37	0.101974	0.887	0.867	3.16e-33	proline-rich coiled-coil 2C [Source:MGI Symbol;Acc:MGI:1913754]
B cells	H2-Q7	2.24e-37	0.0515893	0.878	0.88	3.63e-33	histocompatibility 2, Q region locus 7 [Source:MGI Symbol;Acc:MGI:95936]
B cells	Atpif1	3.11e-37	0.190939	0.505	0.398	5.02e-33	ATPase inhibitory factor 1 [Source:MGI Symbol;Acc:MGI:1196457]
B cells	Ndufv3	4.13e-37	0.199383	0.492	0.389	6.67e-33	NADH:ubiquinone oxidoreductase core subunit V3 [Source:MGI Symbol;Acc:MGI:1890894]
B cells	Sec62	4.53e-37	0.176051	0.646	0.58	7.32e-33	SEC62 homolog (S. cerevisiae) [Source:MGI Symbol;Acc:MGI:1916526]
B cells	Polr2j	5.13e-37	0.229897	0.359	0.23	8.28e-33	polymerase (RNA) II (DNA directed) polypeptide J [Source:MGI Symbol;Acc:MGI:109582]
B cells	Ldha	6.5e-37	0.188339	0.576	0.526	1.05e-32	lactate dehydrogenase A [Source:MGI Symbol;Acc:MGI:96759]
B cells	Zeb2	6.72e-37	0.133257	0.611	0.58	1.09e-32	zinc finger E-box binding homeobox 2 [Source:MGI Symbol;Acc:MGI:1344407]
B cells	Ndufv2	1.29e-36	0.203638	0.395	0.298	2.08e-32	NADH:ubiquinone oxidoreductase core subunit V2 [Source:MGI Symbol;Acc:MGI:1920150]
B cells	Hmgn2	1.7e-36	0.22019	0.372	0.271	2.74e-32	high mobility group nucleosomal binding domain 2 [Source:MGI Symbol;Acc:MGI:96136]
B cells	Tmem160	2.73e-36	0.18754	0.529	0.44	4.41e-32	transmembrane protein 160 [Source:MGI Symbol;Acc:MGI:1916344]
B cells	Srp9	2.97e-36	0.172378	0.664	0.599	4.8e-32	signal recognition particle 9 [Source:MGI Symbol;Acc:MGI:1350930]
B cells	Ctso	6.05e-36	0.174834	0.576	0.505	9.78e-32	cathepsin O [Source:MGI Symbol;Acc:MGI:2139628]
B cells	Bcap31	8.64e-36	0.190325	0.529	0.432	1.4e-31	B cell receptor associated protein 31 [Source:MGI Symbol;Acc:MGI:1350933]
B cells	Cetn3	1e-35	0.203895	0.419	0.314	1.62e-31	centrin 3 [Source:MGI Symbol;Acc:MGI:1097706]
B cells	Cmtm7	1.21e-35	0.185385	0.571	0.482	1.95e-31	CKLF-like MARVEL transmembrane domain containing 7 [Source:MGI Symbol;Acc:MGI:2447166]
B cells	Hnrnpf	1.36e-35	-0.000554637	0.858	0.889	2.19e-31	heterogeneous nuclear ribonucleoprotein F [Source:MGI Symbol;Acc:MGI:2138741]
B cells	Dnajc7	1.57e-35	0.0806582	0.68	0.655	2.53e-31	DnaJ heat shock protein family (Hsp40) member C7 [Source:MGI Symbol;Acc:MGI:1928373]
B cells	Rtraf	1.65e-35	0.159205	0.593	0.541	2.66e-31	RNA transcription, translation and transport factor [Source:MGI Symbol;Acc:MGI:1915295]
B cells	Fbl	2.27e-35	0.19227	0.551	0.474	3.67e-31	fibrillarin [Source:MGI Symbol;Acc:MGI:95486]
B cells	Hsph1	2.57e-35	-0.437993	0.169	0.401	4.15e-31	heat shock 105kDa/110kDa protein 1 [Source:MGI Symbol;Acc:MGI:105053]
B cells	Psmg4	2.99e-35	0.195476	0.426	0.339	4.83e-31	proteasome (prosome, macropain) assembly chaperone 4 [Source:MGI Symbol;Acc:MGI:1916916]
B cells	Ppp1r14b	3.19e-35	0.20369	0.496	0.441	5.16e-31	protein phosphatase 1, regulatory inhibitor subunit 14B [Source:MGI Symbol;Acc:MGI:107682]
B cells	Ndufa5	4.59e-35	0.193078	0.447	0.334	7.42e-31	NADH:ubiquinone oxidoreductase subunit A5 [Source:MGI Symbol;Acc:MGI:1915452]
B cells	Snhg8	6.13e-35	0.166432	0.577	0.516	9.91e-31	small nucleolar RNA host gene 8 [Source:MGI Symbol;Acc:MGI:1917145]
B cells	1110004F10Rik	6.26e-35	0.187115	0.431	0.366	1.01e-30	RIKEN cDNA 1110004F10 gene [Source:MGI Symbol;Acc:MGI:1929274]
B cells	Ndufb9	6.33e-35	0.173525	0.594	0.531	1.02e-30	NADH:ubiquinone oxidoreductase subunit B9 [Source:MGI Symbol;Acc:MGI:1913468]
B cells	Pdcd4	7.7e-35	0.0382559	0.705	0.723	1.24e-30	programmed cell death 4 [Source:MGI Symbol;Acc:MGI:107490]
B cells	Pmf1	7.8e-35	0.177776	0.495	0.431	1.26e-30	polyamine-modulated factor 1 [Source:MGI Symbol;Acc:MGI:1914287]
B cells	Snu13	8.29e-35	0.177357	0.564	0.493	1.34e-30	SNU13 homolog, small nuclear ribonucleoprotein (U4/U6.U5) [Source:MGI Symbol;Acc:MGI:893586]
B cells	Ufc1	8.95e-35	0.22019	0.359	0.249	1.45e-30	ubiquitin-fold modifier conjugating enzyme 1 [Source:MGI Symbol;Acc:MGI:1913405]
B cells	Atox1	1.02e-34	0.184433	0.459	0.377	1.65e-30	antioxidant 1 copper chaperone [Source:MGI Symbol;Acc:MGI:1333855]
B cells	Tcf25	1.08e-34	0.140448	0.744	0.713	1.75e-30	transcription factor 25 (basic helix-loop-helix) [Source:MGI Symbol;Acc:MGI:1914105]
B cells	Rab4b	1.34e-34	0.185311	0.501	0.402	2.16e-30	RAB4B, member RAS oncogene family [Source:MGI Symbol;Acc:MGI:105071]
B cells	Taldo1	1.36e-34	0.161252	0.601	0.541	2.19e-30	transaldolase 1 [Source:MGI Symbol;Acc:MGI:1274789]
B cells	Sdhb	1.66e-34	0.203223	0.386	0.282	2.69e-30	succinate dehydrogenase complex, subunit B, iron sulfur (Ip) [Source:MGI Symbol;Acc:MGI:1914930]
B cells	Gimap4	1.82e-34	0.10536	0.771	0.751	2.94e-30	GTPase, IMAP family member 4 [Source:MGI Symbol;Acc:MGI:1349656]
B cells	Sf3b6	1.89e-34	0.177666	0.596	0.522	3.05e-30	splicing factor 3B, subunit 6 [Source:MGI Symbol;Acc:MGI:1913305]
B cells	Tax1bp1	2.43e-34	0.140248	0.726	0.677	3.92e-30	Tax1 (human T cell leukemia virus type I) binding protein 1 [Source:MGI Symbol;Acc:MGI:1289308]
B cells	Wdr83os	3.77e-34	0.192387	0.427	0.332	6.09e-30	WD repeat domain 83 opposite strand [Source:MGI Symbol;Acc:MGI:3041257]
B cells	Gngt2	3.91e-34	0.198295	0.457	0.386	6.32e-30	guanine nucleotide binding protein (G protein), gamma transducing activity polypeptide 2 [Source:MGI Symbol;Acc:MGI:893584]
B cells	Prdx2	4.59e-34	0.169147	0.459	0.387	7.41e-30	peroxiredoxin 2 [Source:MGI Symbol;Acc:MGI:109486]
B cells	Rbis	5.01e-34	0.183086	0.462	0.364	8.09e-30	ribosomal biogenesis factor [Source:MGI Symbol;Acc:MGI:1916376]
B cells	Phb2	5.88e-34	0.170719	0.552	0.497	9.5e-30	prohibitin 2 [Source:MGI Symbol;Acc:MGI:102520]
B cells	Tagln2	1.03e-33	0.194478	0.38	0.35	1.67e-29	transgelin 2 [Source:MGI Symbol;Acc:MGI:1312985]
B cells	Mycbp2	1.97e-33	0.0498985	0.911	0.914	3.18e-29	MYC binding protein 2, E3 ubiquitin protein ligase [Source:MGI Symbol;Acc:MGI:2179432]
B cells	Pnn	2.1e-33	0.119571	0.726	0.704	3.39e-29	pinin [Source:MGI Symbol;Acc:MGI:1100514]
B cells	Baz2b	2.44e-33	0.169131	0.638	0.575	3.95e-29	bromodomain adjacent to zinc finger domain, 2B [Source:MGI Symbol;Acc:MGI:2442782]
B cells	Chchd10	3.29e-33	0.204266	0.449	0.385	5.31e-29	coiled-coil-helix-coiled-coil-helix domain containing 10 [Source:MGI Symbol;Acc:MGI:2143558]
B cells	Eif6	3.74e-33	0.204463	0.361	0.252	6.04e-29	eukaryotic translation initiation factor 6 [Source:MGI Symbol;Acc:MGI:1196288]
B cells	Bcl2	4.06e-33	0.134592	0.723	0.67	6.56e-29	B cell leukemia/lymphoma 2 [Source:MGI Symbol;Acc:MGI:88138]
B cells	Btg2	5.02e-33	0.119181	0.624	0.586	8.11e-29	BTG anti-proliferation factor 2 [Source:MGI Symbol;Acc:MGI:108384]
B cells	Atp6v1g1	8.82e-33	0.166625	0.519	0.445	1.42e-28	ATPase, H+ transporting, lysosomal V1 subunit G1 [Source:MGI Symbol;Acc:MGI:1913540]
B cells	Ctsz	9.56e-33	0.114941	0.809	0.791	1.54e-28	cathepsin Z [Source:MGI Symbol;Acc:MGI:1891190]
B cells	Ctcf	1.02e-32	0.149179	0.634	0.591	1.64e-28	CCCTC-binding factor [Source:MGI Symbol;Acc:MGI:109447]
B cells	Nudc	1.23e-32	0.188525	0.394	0.316	1.98e-28	nudC nuclear distribution protein [Source:MGI Symbol;Acc:MGI:106014]
B cells	Jpt1	1.42e-32	0.130786	0.663	0.634	2.29e-28	Jupiter microtubule associated homolog 1 [Source:MGI Symbol;Acc:MGI:1096361]
B cells	Wasf2	1.57e-32	0.168819	0.588	0.512	2.54e-28	WASP family, member 2 [Source:MGI Symbol;Acc:MGI:1098641]
B cells	Rnh1	2.32e-32	0.205356	0.361	0.256	3.76e-28	ribonuclease/angiogenin inhibitor 1 [Source:MGI Symbol;Acc:MGI:1195456]
B cells	Myl12a	2.47e-32	0.175793	0.576	0.509	3.99e-28	myosin, light chain 12A, regulatory, non-sarcomeric [Source:MGI Symbol;Acc:MGI:1914518]
B cells	Kras	2.57e-32	0.184194	0.427	0.33	4.16e-28	Kirsten rat sarcoma viral oncogene homolog [Source:MGI Symbol;Acc:MGI:96680]
B cells	Gdi2	3.07e-32	0.0158179	0.803	0.819	4.95e-28	guanosine diphosphate (GDP) dissociation inhibitor 2 [Source:MGI Symbol;Acc:MGI:99845]
B cells	Emc6	3.46e-32	0.186587	0.432	0.339	5.59e-28	ER membrane protein complex subunit 6 [Source:MGI Symbol;Acc:MGI:1913298]
B cells	Gimap5	3.88e-32	0.167605	0.574	0.492	6.28e-28	GTPase, IMAP family member 5 [Source:MGI Symbol;Acc:MGI:2442232]
B cells	Ppp1ca	4.63e-32	0.109056	0.755	0.737	7.49e-28	protein phosphatase 1 catalytic subunit alpha [Source:MGI Symbol;Acc:MGI:103016]
B cells	Sh3glb1	4.66e-32	0.122635	0.666	0.641	7.52e-28	SH3-domain GRB2-like B1 (endophilin) [Source:MGI Symbol;Acc:MGI:1859730]
B cells	1810058I24Rik	4.93e-32	0.179439	0.485	0.402	7.97e-28	RIKEN cDNA 1810058I24 gene [Source:MGI Symbol;Acc:MGI:1914955]
B cells	Imp3	6.01e-32	0.167602	0.48	0.39	9.71e-28	IMP3, U3 small nucleolar ribonucleoprotein [Source:MGI Symbol;Acc:MGI:1916119]
B cells	Zfas1	7.18e-32	0.0931749	0.614	0.609	1.16e-27	zinc finger, NFX1-type containing 1, antisense RNA 1 [Source:MGI Symbol;Acc:MGI:1916199]
B cells	Swi5	8.86e-32	0.17332	0.578	0.506	1.43e-27	SWI5 recombination repair homolog (yeast) [Source:MGI Symbol;Acc:MGI:1920181]
B cells	Prdx5	1.28e-31	0.169023	0.44	0.339	2.06e-27	peroxiredoxin 5 [Source:MGI Symbol;Acc:MGI:1859821]
B cells	Iqgap1	1.31e-31	0.0691485	0.908	0.912	2.12e-27	IQ motif containing GTPase activating protein 1 [Source:MGI Symbol;Acc:MGI:1352757]
B cells	Ripor2	1.36e-31	0.165882	0.662	0.62	2.19e-27	RHO family interacting cell polarization regulator 2 [Source:MGI Symbol;Acc:MGI:2444879]
B cells	Pfdn1	1.4e-31	0.197364	0.359	0.262	2.26e-27	prefoldin 1 [Source:MGI Symbol;Acc:MGI:1914449]
B cells	Mpc2	1.76e-31	0.180374	0.405	0.32	2.84e-27	mitochondrial pyruvate carrier 2 [Source:MGI Symbol;Acc:MGI:1917706]
B cells	Cd22	3.32e-31	0.116499	0.886	0.86	5.37e-27	CD22 antigen [Source:MGI Symbol;Acc:MGI:88322]
B cells	Pabpn1	4.23e-31	0.13527	0.719	0.687	6.84e-27	poly(A) binding protein, nuclear 1 [Source:MGI Symbol;Acc:MGI:1859158]
B cells	Ube2m	4.68e-31	0.182634	0.38	0.285	7.56e-27	ubiquitin-conjugating enzyme E2M [Source:MGI Symbol;Acc:MGI:108278]
B cells	Atp6v0c	4.9e-31	0.170143	0.59	0.527	7.92e-27	ATPase, H+ transporting, lysosomal V0 subunit C [Source:MGI Symbol;Acc:MGI:88116]
B cells	Timm13	4.92e-31	0.166135	0.623	0.569	7.95e-27	translocase of inner mitochondrial membrane 13 [Source:MGI Symbol;Acc:MGI:1353432]
B cells	Pkig	5.46e-31	0.107778	0.68	0.659	8.82e-27	protein kinase inhibitor, gamma [Source:MGI Symbol;Acc:MGI:1343086]
B cells	Mrpl33	5.82e-31	0.176203	0.509	0.416	9.41e-27	mitochondrial ribosomal protein L33 [Source:MGI Symbol;Acc:MGI:2137225]
B cells	Pdcd5	7.75e-31	0.176321	0.519	0.434	1.25e-26	programmed cell death 5 [Source:MGI Symbol;Acc:MGI:1913538]
B cells	Hypk	8.69e-31	0.169295	0.411	0.325	1.4e-26	huntingtin interacting protein K [Source:MGI Symbol;Acc:MGI:1914943]
B cells	Ndufa6	1.36e-30	0.10278	0.721	0.694	2.2e-26	NADH:ubiquinone oxidoreductase subunit A6 [Source:MGI Symbol;Acc:MGI:1914380]
B cells	Nrd1	1.56e-30	0.162477	0.547	0.471	2.53e-26	nardilysin, N-arginine dibasic convertase, NRD convertase 1 [Source:MGI Symbol;Acc:MGI:1201386]
B cells	Txnip	1.62e-30	0.16949	0.713	0.669	2.62e-26	thioredoxin interacting protein [Source:MGI Symbol;Acc:MGI:1889549]
B cells	Rer1	1.98e-30	0.168053	0.46	0.367	3.2e-26	retention in endoplasmic reticulum sorting receptor 1 [Source:MGI Symbol;Acc:MGI:1915080]
B cells	Ddrgk1	2.14e-30	0.16989	0.421	0.323	3.46e-26	DDRGK domain containing 1 [Source:MGI Symbol;Acc:MGI:1924256]
B cells	Etfb	2.57e-30	0.192467	0.363	0.276	4.15e-26	electron transferring flavoprotein, beta polypeptide [Source:MGI Symbol;Acc:MGI:106098]
B cells	Srsf7	2.69e-30	0.0533285	0.72	0.731	4.34e-26	serine and arginine-rich splicing factor 7 [Source:MGI Symbol;Acc:MGI:1926232]
B cells	Ostc	2.69e-30	0.16691	0.485	0.413	4.35e-26	oligosaccharyltransferase complex subunit (non-catalytic) [Source:MGI Symbol;Acc:MGI:1913607]
B cells	Cyc1	3.94e-30	0.174458	0.399	0.299	6.36e-26	cytochrome c-1 [Source:MGI Symbol;Acc:MGI:1913695]
B cells	Gnl3	4.06e-30	0.151408	0.493	0.432	6.56e-26	guanine nucleotide binding protein-like 3 (nucleolar) [Source:MGI Symbol;Acc:MGI:1353651]
B cells	Bcl10	5.01e-30	0.156783	0.484	0.415	8.09e-26	B cell leukemia/lymphoma 10 [Source:MGI Symbol;Acc:MGI:1337994]
B cells	Sf3b2	5.37e-30	0.128063	0.731	0.71	8.68e-26	splicing factor 3b, subunit 2 [Source:MGI Symbol;Acc:MGI:2441856]
B cells	Cybb	5.61e-30	0.0541415	0.907	0.903	9.06e-26	cytochrome b-245, beta polypeptide [Source:MGI Symbol;Acc:MGI:88574]
B cells	Ndufa1	5.96e-30	0.16738	0.586	0.504	9.62e-26	NADH:ubiquinone oxidoreductase subunit A1 [Source:MGI Symbol;Acc:MGI:1929511]
B cells	Nop53	7.03e-30	0.0743447	0.767	0.758	1.14e-25	NOP53 ribosome biogenesis factor [Source:MGI Symbol;Acc:MGI:2154441]
B cells	Anapc13	1.01e-29	0.17518	0.411	0.326	1.64e-25	anaphase promoting complex subunit 13 [Source:MGI Symbol;Acc:MGI:1916260]
B cells	Ndufc2	1.25e-29	0.178795	0.525	0.433	2.02e-25	NADH:ubiquinone oxidoreductase subunit C2 [Source:MGI Symbol;Acc:MGI:1344370]
B cells	Pdia4	1.56e-29	0.068386	0.745	0.748	2.51e-25	protein disulfide isomerase associated 4 [Source:MGI Symbol;Acc:MGI:104864]
B cells	Pnrc1	1.57e-29	0.144267	0.566	0.514	2.53e-25	proline-rich nuclear receptor coactivator 1 [Source:MGI Symbol;Acc:MGI:1917838]
B cells	Chd2	1.64e-29	0.145299	0.638	0.58	2.65e-25	chromodomain helicase DNA binding protein 2 [Source:MGI Symbol;Acc:MGI:2448567]
B cells	Haao	1.86e-29	0.177285	0.37	0.281	3.01e-25	3-hydroxyanthranilate 3,4-dioxygenase [Source:MGI Symbol;Acc:MGI:1349444]
B cells	Hnrnpu	2.01e-29	0.0519196	0.892	0.902	3.24e-25	heterogeneous nuclear ribonucleoprotein U [Source:MGI Symbol;Acc:MGI:1858195]
B cells	Tmed10	2.07e-29	0.151928	0.551	0.471	3.34e-25	transmembrane p24 trafficking protein 10 [Source:MGI Symbol;Acc:MGI:1915831]
B cells	Luc7l2	2.09e-29	-0.00779434	0.919	0.932	3.37e-25	LUC7-like 2 (S. cerevisiae) [Source:MGI Symbol;Acc:MGI:2183260]
B cells	Snx5	2.14e-29	0.085708	0.694	0.676	3.46e-25	sorting nexin 5 [Source:MGI Symbol;Acc:MGI:1916428]
B cells	U2af1	2.18e-29	0.161401	0.413	0.341	3.52e-25	U2 small nuclear ribonucleoprotein auxiliary factor (U2AF) 1 [Source:MGI Symbol;Acc:MGI:98884]
B cells	Stk38	2.57e-29	0.159902	0.581	0.557	4.15e-25	serine/threonine kinase 38 [Source:MGI Symbol;Acc:MGI:2442572]
B cells	Ube2s	2.95e-29	0.153401	0.479	0.416	4.76e-25	ubiquitin-conjugating enzyme E2S [Source:MGI Symbol;Acc:MGI:1925141]
B cells	Srp14	3.02e-29	0.149555	0.598	0.539	4.89e-25	signal recognition particle 14 [Source:MGI Symbol;Acc:MGI:107169]
B cells	Syf2	3.17e-29	0.147599	0.489	0.428	5.12e-25	SYF2 homolog, RNA splicing factor (S. cerevisiae) [Source:MGI Symbol;Acc:MGI:1915842]
B cells	Mrps33	3.41e-29	0.175077	0.475	0.404	5.51e-25	mitochondrial ribosomal protein S33 [Source:MGI Symbol;Acc:MGI:1338046]
B cells	Ndufa8	3.54e-29	0.161404	0.389	0.311	5.71e-25	NADH:ubiquinone oxidoreductase subunit A8 [Source:MGI Symbol;Acc:MGI:1915625]
B cells	Anapc16	3.71e-29	0.161504	0.456	0.381	5.99e-25	anaphase promoting complex subunit 16 [Source:MGI Symbol;Acc:MGI:1289325]
B cells	Arpc5	3.73e-29	0.0816426	0.76	0.765	6.03e-25	actin related protein 2/3 complex, subunit 5 [Source:MGI Symbol;Acc:MGI:1915021]
B cells	Aldh2	3.74e-29	0.124408	0.573	0.554	6.04e-25	aldehyde dehydrogenase 2, mitochondrial [Source:MGI Symbol;Acc:MGI:99600]
B cells	Tpi1	3.77e-29	0.190784	0.397	0.321	6.09e-25	triosephosphate isomerase 1 [Source:MGI Symbol;Acc:MGI:98797]
B cells	Tle5	3.84e-29	0.10733	0.655	0.629	6.2e-25	TLE family member 5, transcriptional modulator [Source:MGI Symbol;Acc:MGI:95806]
B cells	Vamp8	4.71e-29	0.158204	0.542	0.489	7.61e-25	vesicle-associated membrane protein 8 [Source:MGI Symbol;Acc:MGI:1336882]
B cells	Zmat2	5.84e-29	0.161369	0.469	0.392	9.43e-25	zinc finger, matrin type 2 [Source:MGI Symbol;Acc:MGI:1913742]
B cells	Mrps18c	5.91e-29	0.198858	0.328	0.213	9.55e-25	mitochondrial ribosomal protein S18C [Source:MGI Symbol;Acc:MGI:1915985]
B cells	Bcl7c	6.07e-29	0.171294	0.37	0.281	9.81e-25	B cell CLL/lymphoma 7C [Source:MGI Symbol;Acc:MGI:1332237]
B cells	Ceacam16	6.8e-29	0.238221	0.293	0.178	1.1e-24	carcinoembryonic antigen-related cell adhesion molecule 16 [Source:MGI Symbol;Acc:MGI:2685615]
B cells	Hspe1	6.81e-29	0.00108773	0.814	0.836	1.1e-24	heat shock protein 1 (chaperonin 10) [Source:MGI Symbol;Acc:MGI:104680]
B cells	Adgre5	6.82e-29	0.186175	0.598	0.559	1.1e-24	adhesion G protein-coupled receptor E5 [Source:MGI Symbol;Acc:MGI:1347095]
B cells	Gm30211	6.9e-29	0.190378	0.398	0.382	1.12e-24	predicted gene, 30211 [Source:MGI Symbol;Acc:MGI:5589370]
B cells	Ptpn1	9.49e-29	0.0816584	0.754	0.747	1.53e-24	protein tyrosine phosphatase, non-receptor type 1 [Source:MGI Symbol;Acc:MGI:97805]
B cells	Cnbp	1.05e-28	0.128233	0.754	0.733	1.7e-24	cellular nucleic acid binding protein [Source:MGI Symbol;Acc:MGI:88431]
B cells	Cenpx	1.2e-28	0.195273	0.336	0.227	1.93e-24	centromere protein X [Source:MGI Symbol;Acc:MGI:894324]
B cells	Fam104a	1.32e-28	0.157293	0.482	0.403	2.13e-24	family with sequence similarity 104, member A [Source:MGI Symbol;Acc:MGI:106351]
B cells	S100a13	1.59e-28	0.174713	0.386	0.287	2.57e-24	S100 calcium binding protein A13 [Source:MGI Symbol;Acc:MGI:109581]
B cells	Lamtor5	1.68e-28	0.170107	0.371	0.272	2.71e-24	late endosomal/lysosomal adaptor, MAPK and MTOR activator 5 [Source:MGI Symbol;Acc:MGI:1915826]
B cells	Tmem256	1.83e-28	0.185672	0.374	0.301	2.95e-24	transmembrane protein 256 [Source:MGI Symbol;Acc:MGI:1916436]
B cells	Eif3e	1.91e-28	0.0366419	0.785	0.791	3.08e-24	eukaryotic translation initiation factor 3, subunit E [Source:MGI Symbol;Acc:MGI:99257]
B cells	Gtf2a2	2.02e-28	0.156442	0.429	0.347	3.27e-24	general transcription factor II A, 2 [Source:MGI Symbol;Acc:MGI:1933289]
B cells	Drap1	2.23e-28	0.153709	0.483	0.426	3.6e-24	Dr1 associated protein 1 (negative cofactor 2 alpha) [Source:MGI Symbol;Acc:MGI:1913806]
B cells	Snx2	3.28e-28	0.119434	0.665	0.641	5.29e-24	sorting nexin 2 [Source:MGI Symbol;Acc:MGI:1915054]
B cells	Ndufa2	3.31e-28	0.100469	0.724	0.717	5.36e-24	NADH:ubiquinone oxidoreductase subunit A2 [Source:MGI Symbol;Acc:MGI:1343103]
B cells	Uqcrq	3.87e-28	0.132382	0.651	0.615	6.25e-24	ubiquinol-cytochrome c reductase, complex III subunit VII [Source:MGI Symbol;Acc:MGI:107807]
B cells	Cope	5.23e-28	0.165385	0.381	0.288	8.44e-24	coatomer protein complex, subunit epsilon [Source:MGI Symbol;Acc:MGI:1891702]
B cells	Timm23	5.95e-28	0.170206	0.41	0.33	9.61e-24	translocase of inner mitochondrial membrane 23 [Source:MGI Symbol;Acc:MGI:1858317]
B cells	Sumo1	6.05e-28	0.14816	0.549	0.488	9.78e-24	small ubiquitin-like modifier 1 [Source:MGI Symbol;Acc:MGI:1197010]
B cells	Ddx46	6.21e-28	0.144554	0.561	0.496	1e-23	DEAD box helicase 46 [Source:MGI Symbol;Acc:MGI:1920895]
B cells	Grpel1	6.44e-28	0.185924	0.335	0.229	1.04e-23	GrpE-like 1, mitochondrial [Source:MGI Symbol;Acc:MGI:1334417]
B cells	Gps2	6.48e-28	0.162906	0.357	0.263	1.05e-23	G protein pathway suppressor 2 [Source:MGI Symbol;Acc:MGI:1891751]
B cells	Pa2g4	7.35e-28	0.159055	0.46	0.414	1.19e-23	proliferation-associated 2G4 [Source:MGI Symbol;Acc:MGI:894684]
B cells	Tubb4b	7.74e-28	0.150101	0.432	0.384	1.25e-23	tubulin, beta 4B class IVB [Source:MGI Symbol;Acc:MGI:1915472]
B cells	Snf8	8.05e-28	0.151698	0.432	0.34	1.3e-23	SNF8, ESCRT-II complex subunit, homolog (S. cerevisiae) [Source:MGI Symbol;Acc:MGI:1343161]
B cells	Mpc1	1.11e-27	0.168786	0.431	0.352	1.8e-23	mitochondrial pyruvate carrier 1 [Source:MGI Symbol;Acc:MGI:1915240]
B cells	Psmd12	1.15e-27	0.174021	0.347	0.259	1.86e-23	proteasome (prosome, macropain) 26S subunit, non-ATPase, 12 [Source:MGI Symbol;Acc:MGI:1914247]
B cells	Uqcrfs1	1.2e-27	0.154934	0.449	0.37	1.93e-23	ubiquinol-cytochrome c reductase, Rieske iron-sulfur polypeptide 1 [Source:MGI Symbol;Acc:MGI:1913944]
B cells	Pim1	1.24e-27	0.157805	0.394	0.355	2e-23	proviral integration site 1 [Source:MGI Symbol;Acc:MGI:97584]
B cells	Cd9	1.55e-27	0.182062	0.355	0.293	2.5e-23	CD9 antigen [Source:MGI Symbol;Acc:MGI:88348]
B cells	Eif5	1.58e-27	0.0973094	0.799	0.772	2.56e-23	eukaryotic translation initiation factor 5 [Source:MGI Symbol;Acc:MGI:95309]
B cells	Bri3	1.81e-27	0.171522	0.469	0.411	2.93e-23	brain protein I3 [Source:MGI Symbol;Acc:MGI:1933174]
B cells	Vpreb3	1.99e-27	0.251991	0.29	0.202	3.21e-23	pre-B lymphocyte gene 3 [Source:MGI Symbol;Acc:MGI:98938]
B cells	Coa3	2.03e-27	0.169242	0.351	0.251	3.28e-23	cytochrome C oxidase assembly factor 3 [Source:MGI Symbol;Acc:MGI:1098757]
B cells	Banf1	2.24e-27	0.159936	0.513	0.431	3.62e-23	BAF nuclear assembly factor 1 [Source:MGI Symbol;Acc:MGI:1346330]
B cells	Sfr1	2.39e-27	0.172212	0.451	0.367	3.85e-23	SWI5 dependent recombination repair 1 [Source:MGI Symbol;Acc:MGI:1915038]
B cells	Bzw1	2.45e-27	0.1329	0.584	0.555	3.96e-23	basic leucine zipper and W2 domains 1 [Source:MGI Symbol;Acc:MGI:1914132]
B cells	Arid5b	2.63e-27	0.156775	0.429	0.349	4.24e-23	AT rich interactive domain 5B (MRF1-like) [Source:MGI Symbol;Acc:MGI:2175912]
B cells	Sp140	3.01e-27	0.107755	0.573	0.55	4.86e-23	Sp140 nuclear body protein [Source:MGI Symbol;Acc:MGI:3702467]
B cells	Dguok	3.17e-27	0.148986	0.403	0.319	5.12e-23	deoxyguanosine kinase [Source:MGI Symbol;Acc:MGI:1351602]
B cells	Psma1	3.34e-27	0.151123	0.511	0.435	5.39e-23	proteasome subunit alpha 1 [Source:MGI Symbol;Acc:MGI:1347005]
B cells	Tomm6	3.56e-27	0.116392	0.646	0.632	5.75e-23	translocase of outer mitochondrial membrane 6 [Source:MGI Symbol;Acc:MGI:1913369]
B cells	Ndufs3	3.61e-27	0.156871	0.378	0.292	5.84e-23	NADH:ubiquinone oxidoreductase core subunit S3 [Source:MGI Symbol;Acc:MGI:1915599]
B cells	Bcl2a1d	3.77e-27	0.279678	0.272	0.178	6.09e-23	B cell leukemia/lymphoma 2 related protein A1d [Source:MGI Symbol;Acc:MGI:1278325]
B cells	Ndufb2	3.88e-27	0.160964	0.418	0.341	6.28e-23	NADH:ubiquinone oxidoreductase subunit B2 [Source:MGI Symbol;Acc:MGI:1915448]
B cells	Ddx24	5.07e-27	0.133637	0.661	0.611	8.19e-23	DEAD box helicase 24 [Source:MGI Symbol;Acc:MGI:1351337]
B cells	C1qbp	5.28e-27	0.155385	0.469	0.415	8.54e-23	complement component 1, q subcomponent binding protein [Source:MGI Symbol;Acc:MGI:1194505]
B cells	Stap1	5.45e-27	0.0556978	0.72	0.708	8.81e-23	signal transducing adaptor family member 1 [Source:MGI Symbol;Acc:MGI:1926193]
B cells	Manf	5.5e-27	0.171551	0.514	0.458	8.88e-23	mesencephalic astrocyte-derived neurotrophic factor [Source:MGI Symbol;Acc:MGI:1922090]
B cells	Tnrc6c	6.14e-27	0.139233	0.649	0.597	9.92e-23	trinucleotide repeat containing 6C [Source:MGI Symbol;Acc:MGI:2443265]
B cells	Rnaset2b	7.11e-27	0.194133	0.317	0.199	1.15e-22	ribonuclease T2B [Source:MGI Symbol;Acc:MGI:3702087]
B cells	Lsm7	7.95e-27	0.170189	0.38	0.286	1.28e-22	LSM7 homolog, U6 small nuclear RNA and mRNA degradation associated [Source:MGI Symbol;Acc:MGI:1913344]
B cells	Jak1	9.7e-27	0.0930084	0.764	0.736	1.57e-22	Janus kinase 1 [Source:MGI Symbol;Acc:MGI:96628]
B cells	Polr2e	1.05e-26	0.158844	0.451	0.38	1.7e-22	polymerase (RNA) II (DNA directed) polypeptide E [Source:MGI Symbol;Acc:MGI:1913670]
B cells	Dhx36	1.17e-26	0.141491	0.498	0.419	1.89e-22	DEAH (Asp-Glu-Ala-His) box polypeptide 36 [Source:MGI Symbol;Acc:MGI:1919412]
B cells	Cdc37	1.3e-26	0.135473	0.55	0.5	2.09e-22	cell division cycle 37 [Source:MGI Symbol;Acc:MGI:109531]
B cells	Stk24	1.32e-26	0.131651	0.534	0.477	2.14e-22	serine/threonine kinase 24 [Source:MGI Symbol;Acc:MGI:2385007]
B cells	Gpr183	1.4e-26	0.163809	0.49	0.427	2.26e-22	G protein-coupled receptor 183 [Source:MGI Symbol;Acc:MGI:2442034]
B cells	Hprt	1.8e-26	0.156983	0.393	0.321	2.92e-22	hypoxanthine guanine phosphoribosyl transferase [Source:MGI Symbol;Acc:MGI:96217]
B cells	Itga4	2.16e-26	0.135945	0.738	0.699	3.5e-22	integrin alpha 4 [Source:MGI Symbol;Acc:MGI:96603]
B cells	Brd9	2.65e-26	0.147008	0.396	0.3	4.28e-22	bromodomain containing 9 [Source:MGI Symbol;Acc:MGI:2145317]
B cells	Psmd7	2.72e-26	0.15326	0.423	0.341	4.4e-22	proteasome (prosome, macropain) 26S subunit, non-ATPase, 7 [Source:MGI Symbol;Acc:MGI:1351511]
B cells	Nhp2	2.79e-26	0.182292	0.386	0.33	4.51e-22	NHP2 ribonucleoprotein [Source:MGI Symbol;Acc:MGI:1098547]
B cells	Asap1	3.01e-26	0.165331	0.344	0.267	4.87e-22	ArfGAP with SH3 domain, ankyrin repeat and PH domain1 [Source:MGI Symbol;Acc:MGI:1342335]
B cells	Sf3b5	3.2e-26	0.150032	0.52	0.459	5.17e-22	splicing factor 3b, subunit 5 [Source:MGI Symbol;Acc:MGI:1913375]
B cells	Myo1e	3.5e-26	0.13797	0.598	0.555	5.66e-22	myosin IE [Source:MGI Symbol;Acc:MGI:106621]
B cells	Polr2f	3.54e-26	0.153938	0.388	0.31	5.72e-22	polymerase (RNA) II (DNA directed) polypeptide F [Source:MGI Symbol;Acc:MGI:1349393]
B cells	Snrpb	3.55e-26	0.133829	0.62	0.59	5.74e-22	small nuclear ribonucleoprotein B [Source:MGI Symbol;Acc:MGI:98342]
B cells	Arf5	3.79e-26	0.128569	0.634	0.595	6.12e-22	ADP-ribosylation factor 5 [Source:MGI Symbol;Acc:MGI:99434]
B cells	Tmem128	4.74e-26	0.15543	0.363	0.278	7.67e-22	transmembrane protein 128 [Source:MGI Symbol;Acc:MGI:1913559]
B cells	Mrpl20	5.26e-26	0.151214	0.402	0.322	8.5e-22	mitochondrial ribosomal protein L20 [Source:MGI Symbol;Acc:MGI:2137221]
B cells	Trappc4	5.36e-26	0.148712	0.391	0.322	8.67e-22	trafficking protein particle complex 4 [Source:MGI Symbol;Acc:MGI:1926211]
B cells	Fcrla	5.68e-26	0.0945625	0.713	0.69	9.18e-22	Fc receptor-like A [Source:MGI Symbol;Acc:MGI:2138647]
B cells	Lamtor4	5.71e-26	0.15108	0.476	0.394	9.22e-22	late endosomal/lysosomal adaptor, MAPK and MTOR activator 4 [Source:MGI Symbol;Acc:MGI:1913346]
B cells	Ywhaq	7.36e-26	0.146811	0.567	0.503	1.19e-21	tyrosine 3-monooxygenase/tryptophan 5-monooxygenase activation protein theta [Source:MGI Symbol;Acc:MGI:891963]
B cells	Tmem234	7.75e-26	0.10427	0.683	0.639	1.25e-21	transmembrane protein 234 [Source:MGI Symbol;Acc:MGI:1924049]
B cells	Sra1	8.01e-26	0.177384	0.316	0.207	1.29e-21	steroid receptor RNA activator 1 [Source:MGI Symbol;Acc:MGI:1344414]
B cells	Plekhj1	8.81e-26	0.127458	0.521	0.469	1.42e-21	pleckstrin homology domain containing, family J member 1 [Source:MGI Symbol;Acc:MGI:1925920]
B cells	Magoh	1.06e-25	0.152586	0.373	0.291	1.72e-21	mago homolog, exon junction complex core component [Source:MGI Symbol;Acc:MGI:1330312]
B cells	Pdap1	1.17e-25	0.153206	0.442	0.384	1.89e-21	PDGFA associated protein 1 [Source:MGI Symbol;Acc:MGI:2448536]
B cells	Pafah1b3	1.73e-25	0.209089	0.305	0.205	2.79e-21	platelet-activating factor acetylhydrolase, isoform 1b, subunit 3 [Source:MGI Symbol;Acc:MGI:108414]
B cells	Rcsd1	1.76e-25	0.106021	0.703	0.68	2.85e-21	RCSD domain containing 1 [Source:MGI Symbol;Acc:MGI:2676394]
B cells	Cetn2	2.13e-25	0.159548	0.359	0.288	3.44e-21	centrin 2 [Source:MGI Symbol;Acc:MGI:1347085]
B cells	Npc2	2.46e-25	0.122291	0.579	0.542	3.97e-21	NPC intracellular cholesterol transporter 2 [Source:MGI Symbol;Acc:MGI:1915213]
B cells	Otulin	2.64e-25	0.132757	0.523	0.489	4.26e-21	OTU deubiquitinase with linear linkage specificity [Source:MGI Symbol;Acc:MGI:3577015]
B cells	Grap2	3.07e-25	0.154831	0.374	0.3	4.96e-21	GRB2-related adaptor protein 2 [Source:MGI Symbol;Acc:MGI:1333842]
B cells	Hadha	3.48e-25	0.136599	0.448	0.383	5.62e-21	hydroxyacyl-CoA dehydrogenase trifunctional multienzyme complex subunit alpha [Source:MGI Symbol;Acc:MGI:2135593]
B cells	Psmc5	3.75e-25	0.151994	0.365	0.28	6.06e-21	protease (prosome, macropain) 26S subunit, ATPase 5 [Source:MGI Symbol;Acc:MGI:105047]
B cells	Txndc17	3.86e-25	0.147003	0.433	0.351	6.24e-21	thioredoxin domain containing 17 [Source:MGI Symbol;Acc:MGI:1289248]
B cells	Mtdh	4.08e-25	0.0320965	0.878	0.872	6.59e-21	metadherin [Source:MGI Symbol;Acc:MGI:1914404]
B cells	Hnrnpdl	4.46e-25	0.106204	0.657	0.619	7.21e-21	heterogeneous nuclear ribonucleoprotein D-like [Source:MGI Symbol;Acc:MGI:1355299]
B cells	Slc50a1	4.52e-25	0.132869	0.471	0.417	7.3e-21	solute carrier family 50 (sugar transporter), member 1 [Source:MGI Symbol;Acc:MGI:107417]
B cells	Eif2s1	4.74e-25	0.157474	0.405	0.34	7.66e-21	eukaryotic translation initiation factor 2, subunit 1 alpha [Source:MGI Symbol;Acc:MGI:95299]
B cells	Kxd1	5.1e-25	0.148468	0.364	0.303	8.24e-21	KxDL motif containing 1 [Source:MGI Symbol;Acc:MGI:1922870]
B cells	Ankrd11	5.32e-25	0.0369289	0.814	0.817	8.6e-21	ankyrin repeat domain 11 [Source:MGI Symbol;Acc:MGI:1924337]
B cells	Tut4	5.45e-25	0.0747943	0.813	0.793	8.81e-21	terminal uridylyl transferase 4 [Source:MGI Symbol;Acc:MGI:2445126]
B cells	Rrp1	5.48e-25	0.130097	0.509	0.456	8.85e-21	ribosomal RNA processing 1 [Source:MGI Symbol;Acc:MGI:1203500]
B cells	Tomm20	5.73e-25	0.0940279	0.654	0.643	9.25e-21	translocase of outer mitochondrial membrane 20 [Source:MGI Symbol;Acc:MGI:1915202]
B cells	Snhg12	5.74e-25	0.145823	0.385	0.31	9.28e-21	small nucleolar RNA host gene 12 [Source:MGI Symbol;Acc:MGI:1916721]
B cells	Irf2	5.94e-25	0.11045	0.662	0.634	9.6e-21	interferon regulatory factor 2 [Source:MGI Symbol;Acc:MGI:96591]
B cells	Trappc6a	6.63e-25	0.191641	0.311	0.207	1.07e-20	trafficking protein particle complex 6A [Source:MGI Symbol;Acc:MGI:1914341]
B cells	Mbd2	6.99e-25	0.138907	0.464	0.398	1.13e-20	methyl-CpG binding domain protein 2 [Source:MGI Symbol;Acc:MGI:1333813]
B cells	Calr	7.5e-25	0.0672495	0.774	0.772	1.21e-20	calreticulin [Source:MGI Symbol;Acc:MGI:88252]
B cells	Ndufc1	7.51e-25	0.134792	0.486	0.413	1.21e-20	NADH:ubiquinone oxidoreductase subunit C1 [Source:MGI Symbol;Acc:MGI:1913627]
B cells	Kcnq1ot1	7.61e-25	-0.0385448	0.778	0.796	1.23e-20	KCNQ1 overlapping transcript 1 [Source:MGI Symbol;Acc:MGI:1926855]
B cells	Gpcpd1	7.71e-25	0.141007	0.49	0.431	1.25e-20	glycerophosphocholine phosphodiesterase 1 [Source:MGI Symbol;Acc:MGI:104898]
B cells	Tmem59	8.54e-25	0.123272	0.474	0.407	1.38e-20	transmembrane protein 59 [Source:MGI Symbol;Acc:MGI:1929278]
B cells	Cdk12	9.4e-25	0.114629	0.634	0.587	1.52e-20	cyclin-dependent kinase 12 [Source:MGI Symbol;Acc:MGI:1098802]
B cells	Tubb5	1.1e-24	0.0503773	0.699	0.698	1.78e-20	tubulin, beta 5 class I [Source:MGI Symbol;Acc:MGI:107812]
B cells	Commd4	1.14e-24	0.156283	0.354	0.267	1.84e-20	COMM domain containing 4 [Source:MGI Symbol;Acc:MGI:1913449]
B cells	Mdh1	1.15e-24	0.138561	0.539	0.504	1.86e-20	malate dehydrogenase 1, NAD (soluble) [Source:MGI Symbol;Acc:MGI:97051]
B cells	Fam173a	1.21e-24	0.146005	0.396	0.316	1.95e-20	NA
B cells	Hnrnph1	1.21e-24	-0.312139	0.731	0.836	1.96e-20	heterogeneous nuclear ribonucleoprotein H1 [Source:MGI Symbol;Acc:MGI:1891925]
B cells	Upf2	1.25e-24	0.128031	0.455	0.37	2.02e-20	UPF2 regulator of nonsense transcripts homolog (yeast) [Source:MGI Symbol;Acc:MGI:2449307]
B cells	Eny2	1.4e-24	0.1425	0.39	0.324	2.26e-20	ENY2 transcription and export complex 2 subunit [Source:MGI Symbol;Acc:MGI:1919286]
B cells	Camk2d	1.57e-24	0.0422236	0.814	0.813	2.54e-20	calcium/calmodulin-dependent protein kinase II, delta [Source:MGI Symbol;Acc:MGI:1341265]
B cells	Wdr43	1.61e-24	0.14957	0.501	0.447	2.61e-20	WD repeat domain 43 [Source:MGI Symbol;Acc:MGI:1919765]
B cells	Ddx41	1.62e-24	0.137302	0.397	0.312	2.62e-20	DEAD box helicase 41 [Source:MGI Symbol;Acc:MGI:1920185]
B cells	Mrpl18	1.85e-24	0.134423	0.434	0.353	2.98e-20	mitochondrial ribosomal protein L18 [Source:MGI Symbol;Acc:MGI:1914931]
B cells	Ndufs7	1.99e-24	0.138143	0.48	0.394	3.21e-20	NADH:ubiquinone oxidoreductase core subunit S7 [Source:MGI Symbol;Acc:MGI:1922656]
B cells	Pet100	2.5e-24	0.126376	0.476	0.398	4.04e-20	PET100 homolog [Source:MGI Symbol;Acc:MGI:3615306]
B cells	Cnpy3	2.69e-24	0.145472	0.338	0.258	4.34e-20	canopy FGF signaling regulator 3 [Source:MGI Symbol;Acc:MGI:1919279]
B cells	Psma6	2.92e-24	0.141874	0.455	0.395	4.71e-20	proteasome subunit alpha 6 [Source:MGI Symbol;Acc:MGI:1347006]
B cells	Gpi1	3.44e-24	0.0906183	0.672	0.67	5.55e-20	glucose-6-phosphate isomerase 1 [Source:MGI Symbol;Acc:MGI:95797]
B cells	Upf3b	3.93e-24	0.117177	0.467	0.418	6.35e-20	UPF3 regulator of nonsense transcripts homolog B (yeast) [Source:MGI Symbol;Acc:MGI:1915384]
B cells	Tmbim4	4.92e-24	0.140102	0.366	0.293	7.95e-20	transmembrane BAX inhibitor motif containing 4 [Source:MGI Symbol;Acc:MGI:1915462]
B cells	Gimap7	5.85e-24	0.143502	0.447	0.397	9.46e-20	GTPase, IMAP family member 7 [Source:MGI Symbol;Acc:MGI:1349657]
B cells	Tbrg1	6.38e-24	0.135134	0.416	0.352	1.03e-19	transforming growth factor beta regulated gene 1 [Source:MGI Symbol;Acc:MGI:1100877]
B cells	Dek	6.75e-24	0.138384	0.607	0.56	1.09e-19	DEK proto-oncogene (DNA binding) [Source:MGI Symbol;Acc:MGI:1926209]
B cells	Fam204a	6.82e-24	0.145192	0.362	0.288	1.1e-19	family with sequence similarity 204, member A [Source:MGI Symbol;Acc:MGI:1289174]
B cells	Trim12a	7.22e-24	0.0926447	0.676	0.642	1.17e-19	tripartite motif-containing 12A [Source:MGI Symbol;Acc:MGI:1923931]
B cells	Higd2a	7.33e-24	0.145584	0.389	0.318	1.18e-19	HIG1 domain family, member 2A [Source:MGI Symbol;Acc:MGI:1914294]
B cells	Sin3b	7.42e-24	0.132701	0.391	0.321	1.2e-19	transcriptional regulator, SIN3B (yeast) [Source:MGI Symbol;Acc:MGI:107158]
B cells	Plgrkt	7.71e-24	0.136603	0.459	0.399	1.25e-19	plasminogen receptor, C-terminal lysine transmembrane protein [Source:MGI Symbol;Acc:MGI:1915009]
B cells	Tbc1d1	7.72e-24	0.137903	0.398	0.334	1.25e-19	TBC1 domain family, member 1 [Source:MGI Symbol;Acc:MGI:1889508]
B cells	Arpc4	8.49e-24	0.127056	0.649	0.621	1.37e-19	actin related protein 2/3 complex, subunit 4 [Source:MGI Symbol;Acc:MGI:1915339]
B cells	Eif4e2	9.61e-24	0.149928	0.345	0.261	1.55e-19	eukaryotic translation initiation factor 4E member 2 [Source:MGI Symbol;Acc:MGI:1914440]
B cells	Snhg3	9.82e-24	0.184023	0.3	0.222	1.59e-19	small nucleolar RNA host gene 3 [Source:MGI Symbol;Acc:MGI:2684817]
B cells	Dph3	1.09e-23	0.152443	0.369	0.282	1.77e-19	diphthamine biosynthesis 3 [Source:MGI Symbol;Acc:MGI:1922658]
B cells	Uchl3	1.13e-23	0.136219	0.456	0.387	1.83e-19	ubiquitin carboxyl-terminal esterase L3 (ubiquitin thiolesterase) [Source:MGI Symbol;Acc:MGI:1355274]
B cells	BC028528	1.21e-23	0.157381	0.346	0.26	1.95e-19	cDNA sequence BC028528 [Source:MGI Symbol;Acc:MGI:2385885]
B cells	Pcm1	1.4e-23	0.133641	0.424	0.358	2.26e-19	pericentriolar material 1 [Source:MGI Symbol;Acc:MGI:1277958]
B cells	Syk	1.44e-23	0.000681108	0.839	0.856	2.32e-19	spleen tyrosine kinase [Source:MGI Symbol;Acc:MGI:99515]
B cells	Apbb1ip	1.51e-23	0.119135	0.567	0.523	2.44e-19	amyloid beta (A4) precursor protein-binding, family B, member 1 interacting protein [Source:MGI Symbol;Acc:MGI:1861354]
B cells	Samd9l	1.52e-23	0.140378	0.549	0.487	2.46e-19	sterile alpha motif domain containing 9-like [Source:MGI Symbol;Acc:MGI:1343184]
B cells	Lamtor1	1.79e-23	0.136033	0.36	0.293	2.9e-19	late endosomal/lysosomal adaptor, MAPK and MTOR activator 1 [Source:MGI Symbol;Acc:MGI:1913758]
B cells	Samsn1	1.82e-23	0.163516	0.341	0.312	2.94e-19	SAM domain, SH3 domain and nuclear localization signals, 1 [Source:MGI Symbol;Acc:MGI:1914992]
B cells	Sarnp	1.84e-23	0.127092	0.532	0.483	2.98e-19	SAP domain containing ribonucleoprotein [Source:MGI Symbol;Acc:MGI:1913368]
B cells	Ptprc	1.98e-23	-0.0833815	0.984	0.986	3.19e-19	protein tyrosine phosphatase, receptor type, C [Source:MGI Symbol;Acc:MGI:97810]
B cells	Smc1a	1.98e-23	0.136889	0.539	0.477	3.2e-19	structural maintenance of chromosomes 1A [Source:MGI Symbol;Acc:MGI:1344345]
B cells	Pak1ip1	2.27e-23	0.160767	0.327	0.233	3.67e-19	PAK1 interacting protein 1 [Source:MGI Symbol;Acc:MGI:1915333]
B cells	Tmed2	2.55e-23	0.1275	0.536	0.473	4.12e-19	transmembrane p24 trafficking protein 2 [Source:MGI Symbol;Acc:MGI:1929269]
B cells	Mirt1	2.77e-23	0.123342	0.423	0.371	4.48e-19	myocardial infarction associated transcript 1 [Source:MGI Symbol;Acc:MGI:1922001]
B cells	Hcst	2.91e-23	0.143401	0.365	0.319	4.7e-19	hematopoietic cell signal transducer [Source:MGI Symbol;Acc:MGI:1344360]
B cells	Adh5	3.03e-23	0.162714	0.329	0.232	4.9e-19	alcohol dehydrogenase 5 (class III), chi polypeptide [Source:MGI Symbol;Acc:MGI:87929]
B cells	Acp1	3.64e-23	0.143551	0.362	0.286	5.88e-19	acid phosphatase 1, soluble [Source:MGI Symbol;Acc:MGI:87881]
B cells	mt-Nd5	3.8e-23	-0.111002	0.976	0.985	6.14e-19	mitochondrially encoded NADH dehydrogenase 5 [Source:MGI Symbol;Acc:MGI:102496]
B cells	Vapa	4.3e-23	0.121595	0.466	0.416	6.95e-19	vesicle-associated membrane protein, associated protein A [Source:MGI Symbol;Acc:MGI:1353561]
B cells	Snx3	4.88e-23	0.118741	0.512	0.461	7.89e-19	sorting nexin 3 [Source:MGI Symbol;Acc:MGI:1860188]
B cells	Cops6	5.24e-23	0.146482	0.332	0.249	8.47e-19	COP9 signalosome subunit 6 [Source:MGI Symbol;Acc:MGI:1349439]
B cells	Fuca1	5.59e-23	0.126964	0.556	0.493	9.04e-19	fucosidase, alpha-L- 1, tissue [Source:MGI Symbol;Acc:MGI:95593]
B cells	Rheb	5.63e-23	0.136546	0.37	0.29	9.09e-19	Ras homolog enriched in brain [Source:MGI Symbol;Acc:MGI:97912]
B cells	Tnfaip8l2	5.98e-23	0.193635	0.278	0.174	9.67e-19	tumor necrosis factor, alpha-induced protein 8-like 2 [Source:MGI Symbol;Acc:MGI:1917019]
B cells	Cmpk1	6.38e-23	0.126163	0.453	0.401	1.03e-18	cytidine monophosphate (UMP-CMP) kinase 1 [Source:MGI Symbol;Acc:MGI:1913838]
B cells	Cdk2ap2	6.74e-23	0.124552	0.499	0.455	1.09e-18	CDK2-associated protein 2 [Source:MGI Symbol;Acc:MGI:1098779]
B cells	Nmt1	6.83e-23	0.134238	0.358	0.287	1.1e-18	N-myristoyltransferase 1 [Source:MGI Symbol;Acc:MGI:102579]
B cells	Scp2	7.1e-23	0.119914	0.545	0.506	1.15e-18	sterol carrier protein 2, liver [Source:MGI Symbol;Acc:MGI:98254]
B cells	Ddx21	7.45e-23	0.0956688	0.606	0.593	1.2e-18	DExD box helicase 21 [Source:MGI Symbol;Acc:MGI:1860494]
B cells	Ddt	7.58e-23	0.168735	0.31	0.224	1.23e-18	D-dopachrome tautomerase [Source:MGI Symbol;Acc:MGI:1298381]
B cells	Dnajc19	8.19e-23	0.137481	0.384	0.307	1.32e-18	DnaJ heat shock protein family (Hsp40) member C19 [Source:MGI Symbol;Acc:MGI:1914963]
B cells	Aprt	8.43e-23	0.141098	0.435	0.395	1.36e-18	adenine phosphoribosyl transferase [Source:MGI Symbol;Acc:MGI:88061]
B cells	Myo1g	8.5e-23	0.127717	0.41	0.353	1.37e-18	myosin IG [Source:MGI Symbol;Acc:MGI:1927091]
B cells	Rpp21	8.71e-23	0.166898	0.317	0.209	1.41e-18	ribonuclease P 21 subunit [Source:MGI Symbol;Acc:MGI:1914926]
B cells	Smap1	9.36e-23	0.135387	0.349	0.295	1.51e-18	small ArfGAP 1 [Source:MGI Symbol;Acc:MGI:2138261]
B cells	Pou2f2	9.64e-23	-0.12171	0.943	0.951	1.56e-18	POU domain, class 2, transcription factor 2 [Source:MGI Symbol;Acc:MGI:101897]
B cells	Atraid	9.68e-23	0.16184	0.313	0.216	1.56e-18	all-trans retinoic acid induced differentiation factor [Source:MGI Symbol;Acc:MGI:1918918]
B cells	Prorsd1	1.04e-22	0.136649	0.33	0.264	1.67e-18	prolyl-tRNA synthetase domain containing 1 [Source:MGI Symbol;Acc:MGI:1915189]
B cells	Fosb	1.05e-22	0.268588	0.226	0.143	1.69e-18	FBJ osteosarcoma oncogene B [Source:MGI Symbol;Acc:MGI:95575]
B cells	Ntan1	1.13e-22	0.167348	0.301	0.21	1.82e-18	N-terminal Asn amidase [Source:MGI Symbol;Acc:MGI:108471]
B cells	Zfand6	1.25e-22	0.117987	0.488	0.428	2.02e-18	zinc finger, AN1-type domain 6 [Source:MGI Symbol;Acc:MGI:1929510]
B cells	Ms4a6c	1.53e-22	0.301735	0.269	0.197	2.47e-18	membrane-spanning 4-domains, subfamily A, member 6C [Source:MGI Symbol;Acc:MGI:2385644]
B cells	0610010K14Rik	1.75e-22	0.160226	0.32	0.226	2.83e-18	RIKEN cDNA 0610010K14 gene [Source:MGI Symbol;Acc:MGI:1915609]
B cells	Gpsm3	1.78e-22	0.123553	0.474	0.429	2.88e-18	G-protein signalling modulator 3 (AGS3-like, C. elegans) [Source:MGI Symbol;Acc:MGI:2146785]
B cells	Mrpl15	1.79e-22	0.147917	0.352	0.264	2.89e-18	mitochondrial ribosomal protein L15 [Source:MGI Symbol;Acc:MGI:1351639]
B cells	Rsbn1l	1.83e-22	0.12248	0.61	0.556	2.96e-18	round spermatid basic protein 1-like [Source:MGI Symbol;Acc:MGI:3036237]
B cells	Cklf	2.02e-22	0.115241	0.392	0.328	3.27e-18	chemokine-like factor [Source:MGI Symbol;Acc:MGI:1922708]
B cells	Bloc1s1	2.36e-22	0.169716	0.297	0.197	3.81e-18	biogenesis of lysosomal organelles complex-1, subunit 1 [Source:MGI Symbol;Acc:MGI:1195276]
B cells	Anapc5	2.99e-22	0.119626	0.439	0.393	4.84e-18	anaphase-promoting complex subunit 5 [Source:MGI Symbol;Acc:MGI:1929722]
B cells	Mrpl57	3.01e-22	0.132482	0.39	0.332	4.86e-18	mitochondrial ribosomal protein L57 [Source:MGI Symbol;Acc:MGI:1915090]
B cells	Snapc5	3.22e-22	0.171949	0.295	0.193	5.21e-18	small nuclear RNA activating complex, polypeptide 5 [Source:MGI Symbol;Acc:MGI:1914282]
B cells	5830428M24Rik	3.86e-22	0.126693	0.451	0.391	6.23e-18	RIKEN cDNA 5830428M24 gene [Source:MGI Symbol;Acc:MGI:1923312]
B cells	St8sia4	4.02e-22	0.125823	0.611	0.576	6.5e-18	ST8 alpha-N-acetyl-neuraminide alpha-2,8-sialyltransferase 4 [Source:MGI Symbol;Acc:MGI:106018]
B cells	Cuedc2	4.41e-22	0.176697	0.301	0.201	7.12e-18	CUE domain containing 2 [Source:MGI Symbol;Acc:MGI:1914366]
B cells	Lsm12	4.46e-22	0.127258	0.438	0.38	7.2e-18	LSM12 homolog [Source:MGI Symbol;Acc:MGI:1919592]
B cells	Psmc2	4.48e-22	0.144524	0.317	0.238	7.24e-18	proteasome (prosome, macropain) 26S subunit, ATPase 2 [Source:MGI Symbol;Acc:MGI:109555]
B cells	Cd72	5.34e-22	0.0424571	0.7	0.744	8.63e-18	CD72 antigen [Source:MGI Symbol;Acc:MGI:88345]
B cells	Ranbp1	5.61e-22	0.14718	0.499	0.456	9.06e-18	RAN binding protein 1 [Source:MGI Symbol;Acc:MGI:96269]
B cells	Cstb	5.65e-22	0.148311	0.323	0.241	9.13e-18	cystatin B [Source:MGI Symbol;Acc:MGI:109514]
B cells	Ier5	5.74e-22	0.0804732	0.632	0.624	9.27e-18	immediate early response 5 [Source:MGI Symbol;Acc:MGI:1337072]
B cells	Mrps34	5.86e-22	0.172449	0.292	0.199	9.46e-18	mitochondrial ribosomal protein S34 [Source:MGI Symbol;Acc:MGI:1930188]
B cells	Sms	6.45e-22	0.126139	0.468	0.421	1.04e-17	spermine synthase [Source:MGI Symbol;Acc:MGI:109490]
B cells	Rab2a	6.92e-22	0.129246	0.423	0.363	1.12e-17	RAB2A, member RAS oncogene family [Source:MGI Symbol;Acc:MGI:1928750]
B cells	Frg1	7.05e-22	0.126219	0.372	0.295	1.14e-17	FSHD region gene 1 [Source:MGI Symbol;Acc:MGI:893597]
B cells	Vdac3	7.3e-22	0.123305	0.41	0.339	1.18e-17	voltage-dependent anion channel 3 [Source:MGI Symbol;Acc:MGI:106922]
B cells	Rabep2	7.36e-22	0.12592	0.359	0.283	1.19e-17	rabaptin, RAB GTPase binding effector protein 2 [Source:MGI Symbol;Acc:MGI:1917564]
B cells	Ube2a	8.03e-22	0.174673	0.319	0.253	1.3e-17	ubiquitin-conjugating enzyme E2A [Source:MGI Symbol;Acc:MGI:102959]
B cells	Hsbp1	8.14e-22	0.126136	0.413	0.336	1.32e-17	heat shock factor binding protein 1 [Source:MGI Symbol;Acc:MGI:1915446]
B cells	Plp2	8.77e-22	0.158819	0.305	0.24	1.42e-17	proteolipid protein 2 [Source:MGI Symbol;Acc:MGI:1298382]
B cells	Spcs1	8.89e-22	0.125758	0.398	0.335	1.44e-17	signal peptidase complex subunit 1 homolog (S. cerevisiae) [Source:MGI Symbol;Acc:MGI:1916269]
B cells	Cxcr5	9.61e-22	0.144599	0.515	0.453	1.55e-17	chemokine (C-X-C motif) receptor 5 [Source:MGI Symbol;Acc:MGI:103567]
B cells	Tigd2	9.63e-22	0.133358	0.356	0.274	1.56e-17	tigger transposable element derived 2 [Source:MGI Symbol;Acc:MGI:1915390]
B cells	Unc119	1.03e-21	0.148961	0.333	0.256	1.67e-17	unc-119 lipid binding chaperone [Source:MGI Symbol;Acc:MGI:1328357]
B cells	Ddx39	1.04e-21	0.14431	0.341	0.275	1.68e-17	NA
B cells	Bsg	1.05e-21	0.108452	0.478	0.432	1.7e-17	basigin [Source:MGI Symbol;Acc:MGI:88208]
B cells	Mrpl17	1.07e-21	0.162284	0.313	0.231	1.73e-17	mitochondrial ribosomal protein L17 [Source:MGI Symbol;Acc:MGI:1351608]
B cells	BC031181	1.14e-21	0.125597	0.394	0.315	1.83e-17	cDNA sequence BC031181 [Source:MGI Symbol;Acc:MGI:3039614]
B cells	Ndufb10	1.14e-21	0.106064	0.545	0.525	1.84e-17	NADH:ubiquinone oxidoreductase subunit B10 [Source:MGI Symbol;Acc:MGI:1915592]
B cells	Plaur	1.24e-21	0.142439	0.361	0.297	2.01e-17	plasminogen activator, urokinase receptor [Source:MGI Symbol;Acc:MGI:97612]
B cells	Tsc22d4	1.35e-21	0.0680787	0.745	0.724	2.18e-17	TSC22 domain family, member 4 [Source:MGI Symbol;Acc:MGI:1926079]
B cells	1110038B12Rik	1.55e-21	0.194299	0.269	0.198	2.51e-17	RIKEN cDNA 1110038B12 gene [Source:MGI Symbol;Acc:MGI:1916013]
B cells	Ppm1g	1.6e-21	0.119888	0.426	0.374	2.59e-17	protein phosphatase 1G (formerly 2C), magnesium-dependent, gamma isoform [Source:MGI Symbol;Acc:MGI:106065]
B cells	Rbm8a	1.63e-21	0.122165	0.467	0.415	2.63e-17	RNA binding motif protein 8a [Source:MGI Symbol;Acc:MGI:1913129]
B cells	Acp5	1.79e-21	0.110563	0.479	0.448	2.9e-17	acid phosphatase 5, tartrate resistant [Source:MGI Symbol;Acc:MGI:87883]
B cells	Selenoh	2.25e-21	0.138565	0.359	0.287	3.64e-17	selenoprotein H [Source:MGI Symbol;Acc:MGI:1919907]
B cells	Akr1a1	2.31e-21	0.106629	0.515	0.475	3.73e-17	aldo-keto reductase family 1, member A1 (aldehyde reductase) [Source:MGI Symbol;Acc:MGI:1929955]
B cells	Bend5	2.76e-21	0.161109	0.294	0.195	4.47e-17	BEN domain containing 5 [Source:MGI Symbol;Acc:MGI:1914871]
B cells	Yeats4	3.02e-21	0.115512	0.501	0.448	4.89e-17	YEATS domain containing 4 [Source:MGI Symbol;Acc:MGI:1927224]
B cells	Cox16	3.05e-21	0.125017	0.477	0.41	4.92e-17	cytochrome c oxidase assembly protein 16 [Source:MGI Symbol;Acc:MGI:1913522]
B cells	H2afy	3.3e-21	0.0868595	0.699	0.672	5.34e-17	NA
B cells	Fmc1	3.49e-21	0.176596	0.275	0.177	5.63e-17	formation of mitochondrial complex V assembly factor 1 [Source:MGI Symbol;Acc:MGI:1913367]
B cells	Tbcb	3.83e-21	0.133847	0.35	0.278	6.18e-17	tubulin folding cofactor B [Source:MGI Symbol;Acc:MGI:1913661]
B cells	Nfu1	4.33e-21	0.137367	0.321	0.237	6.99e-17	NFU1 iron-sulfur cluster scaffold [Source:MGI Symbol;Acc:MGI:1913290]
B cells	Vps29	4.48e-21	0.130741	0.34	0.272	7.24e-17	VPS29 retromer complex component [Source:MGI Symbol;Acc:MGI:1928344]
B cells	Mrpl42	4.73e-21	0.147608	0.328	0.244	7.64e-17	mitochondrial ribosomal protein L42 [Source:MGI Symbol;Acc:MGI:1333774]
B cells	Polr2k	4.97e-21	0.129512	0.376	0.309	8.04e-17	polymerase (RNA) II (DNA directed) polypeptide K [Source:MGI Symbol;Acc:MGI:102725]
B cells	Os9	5.01e-21	0.138113	0.332	0.26	8.1e-17	amplified in osteosarcoma [Source:MGI Symbol;Acc:MGI:1924301]
B cells	Prmt1	5.79e-21	0.131901	0.366	0.298	9.35e-17	protein arginine N-methyltransferase 1 [Source:MGI Symbol;Acc:MGI:107846]
B cells	Uqcc2	6.01e-21	0.136651	0.408	0.344	9.71e-17	ubiquinol-cytochrome c reductase complex assembly factor 2 [Source:MGI Symbol;Acc:MGI:1914517]
B cells	Cwc15	6.06e-21	0.122405	0.477	0.435	9.78e-17	CWC15 spliceosome-associated protein [Source:MGI Symbol;Acc:MGI:1913320]
B cells	Tmem167	7.64e-21	0.125561	0.528	0.47	1.23e-16	transmembrane protein 167 [Source:MGI Symbol;Acc:MGI:1913324]
B cells	Pitpna	8.13e-21	0.117301	0.568	0.528	1.31e-16	phosphatidylinositol transfer protein, alpha [Source:MGI Symbol;Acc:MGI:99887]
B cells	Ndufs2	8.15e-21	0.113842	0.411	0.365	1.32e-16	NADH:ubiquinone oxidoreductase core subunit S2 [Source:MGI Symbol;Acc:MGI:2385112]
B cells	Pfdn6	8.34e-21	0.14218	0.322	0.233	1.35e-16	prefoldin subunit 6 [Source:MGI Symbol;Acc:MGI:95908]
B cells	Klf6	8.55e-21	0.101853	0.376	0.354	1.38e-16	Kruppel-like factor 6 [Source:MGI Symbol;Acc:MGI:1346318]
B cells	Uqcrc1	8.86e-21	0.122254	0.396	0.346	1.43e-16	ubiquinol-cytochrome c reductase core protein 1 [Source:MGI Symbol;Acc:MGI:107876]
B cells	1110059E24Rik	9.4e-21	0.126561	0.356	0.292	1.52e-16	RIKEN cDNA 1110059E24 gene [Source:MGI Symbol;Acc:MGI:1913456]
B cells	Tyrobp	9.56e-21	0.15365	0.304	0.231	1.54e-16	TYRO protein tyrosine kinase binding protein [Source:MGI Symbol;Acc:MGI:1277211]
B cells	Prpf4b	9.67e-21	0.0684069	0.744	0.723	1.56e-16	pre-mRNA processing factor 4B [Source:MGI Symbol;Acc:MGI:109584]
B cells	H2-M3	1.22e-20	0.104936	0.45	0.405	1.96e-16	histocompatibility 2, M region locus 3 [Source:MGI Symbol;Acc:MGI:95915]
B cells	Exosc8	1.33e-20	0.145442	0.302	0.234	2.15e-16	exosome component 8 [Source:MGI Symbol;Acc:MGI:1916889]
B cells	Trappc2l	1.38e-20	0.129365	0.321	0.251	2.24e-16	trafficking protein particle complex 2-like [Source:MGI Symbol;Acc:MGI:1916295]
B cells	AB124611	1.4e-20	0.118023	0.358	0.302	2.26e-16	cDNA sequence AB124611 [Source:MGI Symbol;Acc:MGI:3043001]
B cells	Fcer2a	1.4e-20	0.210697	0.417	0.384	2.26e-16	Fc receptor, IgE, low affinity II, alpha polypeptide [Source:MGI Symbol;Acc:MGI:95497]
B cells	Ndufb3	1.43e-20	0.1203	0.536	0.476	2.3e-16	NADH:ubiquinone oxidoreductase subunit B3 [Source:MGI Symbol;Acc:MGI:1913745]
B cells	Cyb5a	1.62e-20	0.138098	0.316	0.23	2.62e-16	cytochrome b5 type A (microsomal) [Source:MGI Symbol;Acc:MGI:1926952]
B cells	Mien1	1.85e-20	0.117327	0.426	0.362	2.99e-16	migration and invasion enhancer 1 [Source:MGI Symbol;Acc:MGI:1913678]
B cells	Tecr	1.97e-20	0.107687	0.436	0.381	3.19e-16	trans-2,3-enoyl-CoA reductase [Source:MGI Symbol;Acc:MGI:1915408]
B cells	Srsf10	2.08e-20	0.103843	0.607	0.559	3.36e-16	serine and arginine-rich splicing factor 10 [Source:MGI Symbol;Acc:MGI:1333805]
B cells	Timm8b	2.09e-20	0.143841	0.309	0.232	3.38e-16	translocase of inner mitochondrial membrane 8B [Source:MGI Symbol;Acc:MGI:1353424]
B cells	Uqcr11	2.14e-20	0.118943	0.585	0.563	3.45e-16	ubiquinol-cytochrome c reductase, complex III subunit XI [Source:MGI Symbol;Acc:MGI:1913844]
B cells	Nmi	2.21e-20	0.175119	0.29	0.178	3.57e-16	N-myc (and STAT) interactor [Source:MGI Symbol;Acc:MGI:1928368]
B cells	Gm20559	2.24e-20	0.131683	0.565	0.533	3.61e-16	predicted gene, 20559 [Source:MGI Symbol;Acc:MGI:5295666]
B cells	Rpl10-ps3	2.31e-20	0.134793	0.321	0.241	3.73e-16	ribosomal protein L10, pseudogene 3 [Source:MGI Symbol;Acc:MGI:3704336]
B cells	Commd3	2.41e-20	0.118114	0.359	0.29	3.89e-16	COMM domain containing 3 [Source:MGI Symbol;Acc:MGI:88218]
B cells	Eif1a	2.42e-20	0.13277	0.356	0.301	3.91e-16	eukaryotic translation initiation factor 1A [Source:MGI Symbol;Acc:MGI:95298]
B cells	Sptan1	2.44e-20	0.118957	0.416	0.357	3.94e-16	spectrin alpha, non-erythrocytic 1 [Source:MGI Symbol;Acc:MGI:98386]
B cells	Arl6ip5	2.49e-20	0.117117	0.377	0.312	4.03e-16	ADP-ribosylation factor-like 6 interacting protein 5 [Source:MGI Symbol;Acc:MGI:1929501]
B cells	Rbm4b	2.68e-20	0.160904	0.285	0.188	4.34e-16	RNA binding motif protein 4B [Source:MGI Symbol;Acc:MGI:1913954]
B cells	Tra2b	2.69e-20	0.0480986	0.808	0.788	4.35e-16	transformer 2 beta [Source:MGI Symbol;Acc:MGI:106016]
B cells	Lsm3	2.8e-20	0.125932	0.35	0.278	4.52e-16	LSM3 homolog, U6 small nuclear RNA and mRNA degradation associated [Source:MGI Symbol;Acc:MGI:1914928]
B cells	Ube2l3	2.9e-20	0.102493	0.523	0.481	4.68e-16	ubiquitin-conjugating enzyme E2L 3 [Source:MGI Symbol;Acc:MGI:109240]
B cells	Ramac	3.22e-20	0.153534	0.291	0.206	5.21e-16	RNA guanine-7 methyltransferase activating subunit [Source:MGI Symbol;Acc:MGI:1914398]
B cells	Hnrnpk	4.25e-20	-0.0159692	0.839	0.86	6.87e-16	heterogeneous nuclear ribonucleoprotein K [Source:MGI Symbol;Acc:MGI:99894]
B cells	Fam133b	4.49e-20	0.116377	0.355	0.298	7.25e-16	family with sequence similarity 133, member B [Source:MGI Symbol;Acc:MGI:1915402]
B cells	Tbca	4.58e-20	0.110408	0.599	0.57	7.4e-16	tubulin cofactor A [Source:MGI Symbol;Acc:MGI:107549]
B cells	Nsmce1	4.82e-20	0.156226	0.288	0.193	7.79e-16	NSE1 homolog, SMC5-SMC6 complex component [Source:MGI Symbol;Acc:MGI:1914961]
B cells	Mrpl34	5.12e-20	0.121878	0.38	0.327	8.28e-16	mitochondrial ribosomal protein L34 [Source:MGI Symbol;Acc:MGI:2137227]
B cells	Cycs	5.37e-20	0.128716	0.434	0.387	8.68e-16	cytochrome c, somatic [Source:MGI Symbol;Acc:MGI:88578]
B cells	Gtf2h5	6.12e-20	0.115099	0.434	0.373	9.89e-16	general transcription factor IIH, polypeptide 5 [Source:MGI Symbol;Acc:MGI:107227]
B cells	Stoml1	6.43e-20	0.135948	0.33	0.262	1.04e-15	stomatin-like 1 [Source:MGI Symbol;Acc:MGI:1916356]
B cells	Chchd1	6.81e-20	0.117473	0.439	0.385	1.1e-15	coiled-coil-helix-coiled-coil-helix domain containing 1 [Source:MGI Symbol;Acc:MGI:1913371]
B cells	Rchy1	7.25e-20	0.115335	0.39	0.328	1.17e-15	ring finger and CHY zinc finger domain containing 1 [Source:MGI Symbol;Acc:MGI:1915348]
B cells	Trir	7.84e-20	0.101667	0.634	0.603	1.27e-15	telomerase RNA component interacting RNase [Source:MGI Symbol;Acc:MGI:1922833]
B cells	Serpina3g	8.04e-20	0.106649	0.39	0.356	1.3e-15	serine (or cysteine) peptidase inhibitor, clade A, member 3G [Source:MGI Symbol;Acc:MGI:105046]
B cells	Eif1b	8.99e-20	0.109444	0.437	0.393	1.45e-15	eukaryotic translation initiation factor 1B [Source:MGI Symbol;Acc:MGI:1916219]
B cells	Snrpd3	1.03e-19	0.113748	0.488	0.449	1.66e-15	small nuclear ribonucleoprotein D3 [Source:MGI Symbol;Acc:MGI:1914582]
B cells	Eif3g	1.1e-19	0.114122	0.483	0.422	1.77e-15	eukaryotic translation initiation factor 3, subunit G [Source:MGI Symbol;Acc:MGI:1858258]
B cells	Snhg1	1.11e-19	0.124814	0.428	0.389	1.79e-15	small nucleolar RNA host gene 1 [Source:MGI Symbol;Acc:MGI:3763743]
B cells	Prpf8	1.22e-19	0.119961	0.491	0.449	1.98e-15	pre-mRNA processing factor 8 [Source:MGI Symbol;Acc:MGI:2179381]
B cells	Sp110	1.24e-19	0.0799687	0.627	0.604	2.01e-15	Sp110 nuclear body protein [Source:MGI Symbol;Acc:MGI:1923364]
B cells	Epc2	1.33e-19	0.121681	0.347	0.287	2.14e-15	enhancer of polycomb homolog 2 [Source:MGI Symbol;Acc:MGI:1278321]
B cells	Map4k1	1.33e-19	0.127801	0.549	0.512	2.15e-15	mitogen-activated protein kinase kinase kinase kinase 1 [Source:MGI Symbol;Acc:MGI:1346882]
B cells	Gm16286	1.5e-19	0.101133	0.447	0.396	2.42e-15	predicted gene 16286 [Source:MGI Symbol;Acc:MGI:3833940]
B cells	Ndufab1	1.54e-19	0.115885	0.418	0.365	2.48e-15	NADH:ubiquinone oxidoreductase subunit AB1 [Source:MGI Symbol;Acc:MGI:1917566]
B cells	Borcs7	1.82e-19	0.165523	0.261	0.184	2.94e-15	BLOC-1 related complex subunit 7 [Source:MGI Symbol;Acc:MGI:1913689]
B cells	Ahnak	1.84e-19	0.211654	0.402	0.365	2.98e-15	AHNAK nucleoprotein (desmoyokin) [Source:MGI Symbol;Acc:MGI:1316648]
B cells	Fcrl5	1.85e-19	0.117743	0.428	0.402	2.99e-15	Fc receptor-like 5 [Source:MGI Symbol;Acc:MGI:3053558]
B cells	Commd1	1.86e-19	0.194613	0.262	0.151	3e-15	COMM domain containing 1 [Source:MGI Symbol;Acc:MGI:109474]
B cells	Grap	1.91e-19	0.0778432	0.601	0.603	3.08e-15	GRB2-related adaptor protein [Source:MGI Symbol;Acc:MGI:1918770]
B cells	Nucks1	2.01e-19	0.106461	0.709	0.67	3.25e-15	nuclear casein kinase and cyclin-dependent kinase substrate 1 [Source:MGI Symbol;Acc:MGI:1934811]
B cells	Lsm5	2.1e-19	0.106672	0.423	0.373	3.39e-15	LSM5 homolog, U6 small nuclear RNA and mRNA degradation associated [Source:MGI Symbol;Acc:MGI:1913623]
B cells	Cox14	2.17e-19	0.0949815	0.535	0.487	3.5e-15	cytochrome c oxidase assembly protein 14 [Source:MGI Symbol;Acc:MGI:1913629]
B cells	Dnajc9	2.36e-19	0.110746	0.364	0.309	3.81e-15	DnaJ heat shock protein family (Hsp40) member C9 [Source:MGI Symbol;Acc:MGI:1915326]
B cells	Arhgap45	2.51e-19	0.0575576	0.747	0.745	4.06e-15	Rho GTPase activating protein 45 [Source:MGI Symbol;Acc:MGI:1917969]
B cells	Fam49b	2.79e-19	0.0345659	0.827	0.827	4.51e-15	NA
B cells	Ap2s1	2.98e-19	0.103714	0.401	0.337	4.81e-15	adaptor-related protein complex 2, sigma 1 subunit [Source:MGI Symbol;Acc:MGI:2141861]
B cells	Timm17b	3.01e-19	0.138661	0.3	0.214	4.87e-15	translocase of inner mitochondrial membrane 17b [Source:MGI Symbol;Acc:MGI:1343176]
B cells	2022-03-01	3.29e-19	0.0874087	0.588	0.543	5.32e-15	NA
B cells	Gm2a	3.38e-19	0.0725431	0.675	0.65	5.46e-15	GM2 ganglioside activator protein [Source:MGI Symbol;Acc:MGI:95762]
B cells	Snrnp27	3.67e-19	0.11059	0.366	0.321	5.93e-15	small nuclear ribonucleoprotein 27 (U4/U6.U5) [Source:MGI Symbol;Acc:MGI:1913868]
B cells	Use1	3.68e-19	0.0664487	0.626	0.624	5.94e-15	unconventional SNARE in the ER 1 homolog (S. cerevisiae) [Source:MGI Symbol;Acc:MGI:1914273]
B cells	Mrps26	3.82e-19	0.129968	0.322	0.259	6.17e-15	mitochondrial ribosomal protein S26 [Source:MGI Symbol;Acc:MGI:1333830]
B cells	Vti1b	4.06e-19	0.111389	0.351	0.286	6.55e-15	vesicle transport through interaction with t-SNAREs 1B [Source:MGI Symbol;Acc:MGI:1855688]
B cells	Pip4p1	4.35e-19	0.0880095	0.421	0.388	7.03e-15	phosphatidylinositol-4,5-bisphosphate 4-phosphatase 1 [Source:MGI Symbol;Acc:MGI:2448501]
B cells	Susd3	4.51e-19	0.138291	0.306	0.234	7.29e-15	sushi domain containing 3 [Source:MGI Symbol;Acc:MGI:1913579]
B cells	Traf3ip3	6.14e-19	0.0921571	0.567	0.547	9.92e-15	TRAF3 interacting protein 3 [Source:MGI Symbol;Acc:MGI:2441706]
B cells	Ccdc59	6.2e-19	0.114685	0.356	0.302	1e-14	coiled-coil domain containing 59 [Source:MGI Symbol;Acc:MGI:1289302]
B cells	Snx6	6.25e-19	0.124254	0.322	0.251	1.01e-14	sorting nexin 6 [Source:MGI Symbol;Acc:MGI:1919433]
B cells	Bod1l	6.45e-19	0.0934954	0.612	0.586	1.04e-14	biorientation of chromosomes in cell division 1-like [Source:MGI Symbol;Acc:MGI:2444804]
B cells	Phf11b	7.05e-19	0.156236	0.272	0.204	1.14e-14	PHD finger protein 11B [Source:MGI Symbol;Acc:MGI:3645789]
B cells	Cotl1	7.5e-19	0.0673979	0.695	0.703	1.21e-14	coactosin-like 1 (Dictyostelium) [Source:MGI Symbol;Acc:MGI:1919292]
B cells	Mif4gd	7.57e-19	0.0862613	0.602	0.582	1.22e-14	MIF4G domain containing [Source:MGI Symbol;Acc:MGI:1916924]
B cells	Esd	7.67e-19	0.180323	0.267	0.159	1.24e-14	esterase D/formylglutathione hydrolase [Source:MGI Symbol;Acc:MGI:95421]
B cells	Rbm25	7.87e-19	-0.0203854	0.881	0.895	1.27e-14	RNA binding motif protein 25 [Source:MGI Symbol;Acc:MGI:1914289]
B cells	Plekhm3	8.2e-19	0.100853	0.399	0.357	1.32e-14	pleckstrin homology domain containing, family M, member 3 [Source:MGI Symbol;Acc:MGI:2443627]
B cells	Snrnp25	9.56e-19	0.146249	0.297	0.224	1.54e-14	small nuclear ribonucleoprotein 25 (U11/U12) [Source:MGI Symbol;Acc:MGI:1925622]
B cells	Hmgb2	9.76e-19	0.0804591	0.593	0.57	1.58e-14	high mobility group box 2 [Source:MGI Symbol;Acc:MGI:96157]
B cells	Eif5b	1.02e-18	0.0194882	0.69	0.71	1.64e-14	eukaryotic translation initiation factor 5B [Source:MGI Symbol;Acc:MGI:2441772]
B cells	Zup1	1.07e-18	0.0867731	0.596	0.555	1.73e-14	zinc finger containing ubiquitin peptidase 1 [Source:MGI Symbol;Acc:MGI:1919830]
B cells	Utp14a	1.16e-18	0.120341	0.319	0.27	1.87e-14	UTP14A small subunit processome component [Source:MGI Symbol;Acc:MGI:1919804]
B cells	2022-09-06	1.2e-18	0.102581	0.464	0.422	1.94e-14	NA
B cells	Ssr2	1.39e-18	0.139997	0.293	0.215	2.24e-14	signal sequence receptor, beta [Source:MGI Symbol;Acc:MGI:1913506]
B cells	Fkbp2	1.39e-18	0.133347	0.293	0.222	2.25e-14	FK506 binding protein 2 [Source:MGI Symbol;Acc:MGI:95542]
B cells	Glrx3	1.43e-18	0.110752	0.375	0.321	2.31e-14	glutaredoxin 3 [Source:MGI Symbol;Acc:MGI:1353653]
B cells	Bst2	1.49e-18	0.136189	0.305	0.232	2.4e-14	bone marrow stromal cell antigen 2 [Source:MGI Symbol;Acc:MGI:1916800]
B cells	Txn2	1.52e-18	0.0986294	0.432	0.404	2.46e-14	thioredoxin 2 [Source:MGI Symbol;Acc:MGI:1929468]
B cells	Psmd14	1.54e-18	0.117592	0.355	0.289	2.49e-14	proteasome (prosome, macropain) 26S subunit, non-ATPase, 14 [Source:MGI Symbol;Acc:MGI:1913284]
B cells	Suclg1	1.68e-18	0.118448	0.348	0.277	2.72e-14	succinate-CoA ligase, GDP-forming, alpha subunit [Source:MGI Symbol;Acc:MGI:1927234]
B cells	Tec	1.68e-18	0.106809	0.426	0.36	2.72e-14	tec protein tyrosine kinase [Source:MGI Symbol;Acc:MGI:98662]
B cells	Cfdp1	1.91e-18	0.115487	0.324	0.272	3.09e-14	craniofacial development protein 1 [Source:MGI Symbol;Acc:MGI:1344403]
B cells	Snrpc	2.04e-18	0.106237	0.402	0.342	3.3e-14	U1 small nuclear ribonucleoprotein C [Source:MGI Symbol;Acc:MGI:109489]
B cells	Dbi	2.05e-18	0.105502	0.419	0.385	3.31e-14	diazepam binding inhibitor [Source:MGI Symbol;Acc:MGI:94865]
B cells	Rnaseh2c	2.08e-18	0.113763	0.362	0.299	3.37e-14	ribonuclease H2, subunit C [Source:MGI Symbol;Acc:MGI:1915459]
B cells	Fus	2.12e-18	0.0145273	0.929	0.928	3.43e-14	fused in sarcoma [Source:MGI Symbol;Acc:MGI:1353633]
B cells	Jmjd1c	2.35e-18	0.0743984	0.648	0.639	3.79e-14	jumonji domain containing 1C [Source:MGI Symbol;Acc:MGI:1918614]
B cells	Zbtb38	2.37e-18	0.112082	0.374	0.334	3.83e-14	zinc finger and BTB domain containing 38 [Source:MGI Symbol;Acc:MGI:2442866]
B cells	Eprs	2.39e-18	0.126528	0.461	0.405	3.87e-14	glutamyl-prolyl-tRNA synthetase [Source:MGI Symbol;Acc:MGI:97838]
B cells	Arf1	3.01e-18	0.0865504	0.579	0.557	4.87e-14	ADP-ribosylation factor 1 [Source:MGI Symbol;Acc:MGI:99431]
B cells	Ddx42	3.05e-18	0.106644	0.423	0.378	4.92e-14	DEAD box helicase 42 [Source:MGI Symbol;Acc:MGI:1919297]
B cells	Rpl9-ps6	3.43e-18	0.109393	0.34	0.28	5.54e-14	ribosomal protein L9, pseudogene 6 [Source:MGI Symbol;Acc:MGI:3642682]
B cells	Higd1a	3.44e-18	0.101752	0.389	0.34	5.55e-14	HIG1 domain family, member 1A [Source:MGI Symbol;Acc:MGI:1930666]
B cells	Abhd17a	4.14e-18	0.105453	0.409	0.372	6.69e-14	abhydrolase domain containing 17A [Source:MGI Symbol;Acc:MGI:106388]
B cells	Sdf4	4.3e-18	0.103091	0.502	0.46	6.95e-14	stromal cell derived factor 4 [Source:MGI Symbol;Acc:MGI:108079]
B cells	Sdhaf4	4.6e-18	0.145176	0.281	0.192	7.42e-14	succinate dehydrogenase complex assembly factor 4 [Source:MGI Symbol;Acc:MGI:1915252]
B cells	Zranb2	4.87e-18	0.0917402	0.522	0.48	7.87e-14	zinc finger, RAN-binding domain containing 2 [Source:MGI Symbol;Acc:MGI:1858211]
B cells	Mrpl12	4.88e-18	0.111983	0.386	0.329	7.89e-14	mitochondrial ribosomal protein L12 [Source:MGI Symbol;Acc:MGI:1926273]
B cells	Eif2s3y	4.9e-18	0.109104	0.36	0.321	7.91e-14	eukaryotic translation initiation factor 2, subunit 3, structural gene Y-linked [Source:MGI Symbol;Acc:MGI:1349430]
B cells	Sft2d1	5.29e-18	0.111829	0.336	0.281	8.54e-14	SFT2 domain containing 1 [Source:MGI Symbol;Acc:MGI:1918689]
B cells	A930005H10Rik	5.69e-18	0.0992702	0.363	0.326	9.2e-14	RIKEN cDNA A930005H10 gene [Source:MGI Symbol;Acc:MGI:1915411]
B cells	Rtf2	5.95e-18	0.109308	0.317	0.253	9.61e-14	replication termination factor 2 [Source:MGI Symbol;Acc:MGI:1913654]
B cells	0610012G03Rik	6.05e-18	0.122121	0.31	0.234	9.78e-14	RIKEN cDNA 0610012G03 gene [Source:MGI Symbol;Acc:MGI:1913301]
B cells	Smarca5	6.35e-18	0.0716174	0.701	0.702	1.03e-13	SWI/SNF related, matrix associated, actin dependent regulator of chromatin, subfamily a, member 5 [Source:MGI Symbol;Acc:MGI:1935129]
B cells	Mat2a	6.69e-18	-0.402791	0.597	0.753	1.08e-13	methionine adenosyltransferase II, alpha [Source:MGI Symbol;Acc:MGI:2443731]
B cells	Dapp1	7.56e-18	0.098162	0.382	0.324	1.22e-13	dual adaptor for phosphotyrosine and 3-phosphoinositides 1 [Source:MGI Symbol;Acc:MGI:1347063]
B cells	Elof1	7.68e-18	0.14709	0.277	0.193	1.24e-13	ELF1 homolog, elongation factor 1 [Source:MGI Symbol;Acc:MGI:1913376]
B cells	Ppp1r10	7.86e-18	0.101521	0.357	0.287	1.27e-13	protein phosphatase 1, regulatory subunit 10 [Source:MGI Symbol;Acc:MGI:1289273]
B cells	Dctn3	7.89e-18	0.106279	0.345	0.282	1.28e-13	dynactin 3 [Source:MGI Symbol;Acc:MGI:1859251]
B cells	Tmem50a	8.06e-18	0.0901084	0.617	0.574	1.3e-13	transmembrane protein 50A [Source:MGI Symbol;Acc:MGI:1919067]
B cells	Cdk11b	8.12e-18	0.0883243	0.502	0.459	1.31e-13	cyclin-dependent kinase 11B [Source:MGI Symbol;Acc:MGI:88353]
B cells	Dnajb11	8.72e-18	0.107996	0.356	0.298	1.41e-13	DnaJ heat shock protein family (Hsp40) member B11 [Source:MGI Symbol;Acc:MGI:1915088]
B cells	Gemin7	8.93e-18	0.107439	0.348	0.296	1.44e-13	gem nuclear organelle associated protein 7 [Source:MGI Symbol;Acc:MGI:1916981]
B cells	Dhps	9.21e-18	0.132053	0.291	0.205	1.49e-13	deoxyhypusine synthase [Source:MGI Symbol;Acc:MGI:2683592]
B cells	Txnl1	1.06e-17	0.112014	0.342	0.285	1.71e-13	thioredoxin-like 1 [Source:MGI Symbol;Acc:MGI:1860078]
B cells	Asnsd1	1.13e-17	0.0995558	0.449	0.423	1.83e-13	asparagine synthetase domain containing 1 [Source:MGI Symbol;Acc:MGI:1917646]
B cells	Commd7	1.16e-17	0.113393	0.312	0.241	1.88e-13	COMM domain containing 7 [Source:MGI Symbol;Acc:MGI:1914197]
B cells	Rasgrp2	1.22e-17	0.0900405	0.528	0.507	1.97e-13	RAS, guanyl releasing protein 2 [Source:MGI Symbol;Acc:MGI:1333849]
B cells	Trappc6b	1.26e-17	0.0971069	0.369	0.323	2.04e-13	trafficking protein particle complex 6B [Source:MGI Symbol;Acc:MGI:1925482]
B cells	Rasa3	1.28e-17	0.113776	0.386	0.354	2.07e-13	RAS p21 protein activator 3 [Source:MGI Symbol;Acc:MGI:1197013]
B cells	Tox4	1.36e-17	0.0979629	0.372	0.31	2.2e-13	TOX high mobility group box family member 4 [Source:MGI Symbol;Acc:MGI:1915389]
B cells	Rac1	1.47e-17	0.0973022	0.579	0.538	2.38e-13	Rac family small GTPase 1 [Source:MGI Symbol;Acc:MGI:97845]
B cells	Idh3g	1.48e-17	0.0975735	0.392	0.327	2.4e-13	isocitrate dehydrogenase 3 (NAD+), gamma [Source:MGI Symbol;Acc:MGI:1099463]
B cells	Denr	1.49e-17	0.11063	0.451	0.412	2.41e-13	density-regulated protein [Source:MGI Symbol;Acc:MGI:1915434]
B cells	Hnrnpa2b1	1.66e-17	-0.0941783	0.972	0.982	2.68e-13	heterogeneous nuclear ribonucleoprotein A2/B1 [Source:MGI Symbol;Acc:MGI:104819]
B cells	Capza2	1.69e-17	0.0777251	0.644	0.62	2.73e-13	capping protein (actin filament) muscle Z-line, alpha 2 [Source:MGI Symbol;Acc:MGI:106222]
B cells	Hspa5	1.72e-17	-0.028342	0.804	0.809	2.77e-13	heat shock protein 5 [Source:MGI Symbol;Acc:MGI:95835]
B cells	Rbm26	1.74e-17	0.0987532	0.543	0.512	2.81e-13	RNA binding motif protein 26 [Source:MGI Symbol;Acc:MGI:1921463]
B cells	Chd6	1.75e-17	0.101162	0.467	0.415	2.82e-13	chromodomain helicase DNA binding protein 6 [Source:MGI Symbol;Acc:MGI:1918639]
B cells	Bloc1s2	1.86e-17	0.108873	0.33	0.278	3.01e-13	biogenesis of lysosomal organelles complex-1, subunit 2 [Source:MGI Symbol;Acc:MGI:1920939]
B cells	Hnrnpa0	1.94e-17	0.0199535	0.781	0.789	3.13e-13	heterogeneous nuclear ribonucleoprotein A0 [Source:MGI Symbol;Acc:MGI:1924384]
B cells	Cr1l	2.03e-17	0.10047	0.57	0.517	3.27e-13	complement component (3b/4b) receptor 1-like [Source:MGI Symbol;Acc:MGI:88513]
B cells	Nap1l4	2.04e-17	0.0915021	0.412	0.366	3.3e-13	nucleosome assembly protein 1-like 4 [Source:MGI Symbol;Acc:MGI:1316687]
B cells	Slc25a11	2.07e-17	0.10601	0.314	0.254	3.34e-13	solute carrier family 25 (mitochondrial carrier oxoglutarate carrier), member 11 [Source:MGI Symbol;Acc:MGI:1915113]
B cells	Rsu1	2.08e-17	0.100738	0.337	0.301	3.35e-13	Ras suppressor protein 1 [Source:MGI Symbol;Acc:MGI:103040]
B cells	Rab21	2.1e-17	0.0778772	0.588	0.555	3.4e-13	RAB21, member RAS oncogene family [Source:MGI Symbol;Acc:MGI:894308]
B cells	Zfp318	2.13e-17	0.0742071	0.529	0.501	3.44e-13	zinc finger protein 318 [Source:MGI Symbol;Acc:MGI:1889348]
B cells	Emc10	2.29e-17	0.0945743	0.4	0.339	3.71e-13	ER membrane protein complex subunit 10 [Source:MGI Symbol;Acc:MGI:1916933]
B cells	Pdia3	2.39e-17	0.0887667	0.687	0.673	3.86e-13	protein disulfide isomerase associated 3 [Source:MGI Symbol;Acc:MGI:95834]
B cells	Thrap3	2.4e-17	0.0770052	0.666	0.642	3.87e-13	thyroid hormone receptor associated protein 3 [Source:MGI Symbol;Acc:MGI:2442637]
B cells	Knop1	2.4e-17	0.106887	0.31	0.258	3.88e-13	lysine rich nucleolar protein 1 [Source:MGI Symbol;Acc:MGI:1913606]
B cells	Ier2	2.46e-17	0.115536	0.308	0.269	3.97e-13	immediate early response 2 [Source:MGI Symbol;Acc:MGI:104815]
B cells	Tle4	2.47e-17	0.106817	0.439	0.397	4e-13	transducin-like enhancer of split 4 [Source:MGI Symbol;Acc:MGI:104633]
B cells	Rex1bd	2.51e-17	0.118627	0.305	0.244	4.05e-13	required for excision 1-B domain containing [Source:MGI Symbol;Acc:MGI:1913712]
B cells	Acin1	2.57e-17	0.0479059	0.754	0.75	4.15e-13	apoptotic chromatin condensation inducer 1 [Source:MGI Symbol;Acc:MGI:1891824]
B cells	Nop58	2.69e-17	0.115446	0.429	0.392	4.35e-13	NOP58 ribonucleoprotein [Source:MGI Symbol;Acc:MGI:1933184]
B cells	Pfdn2	2.72e-17	0.0973401	0.387	0.351	4.39e-13	prefoldin 2 [Source:MGI Symbol;Acc:MGI:1276111]
B cells	Casp1	3.05e-17	0.141163	0.274	0.198	4.93e-13	caspase 1 [Source:MGI Symbol;Acc:MGI:96544]
B cells	Pebp1	3.1e-17	0.0978271	0.518	0.487	5.01e-13	phosphatidylethanolamine binding protein 1 [Source:MGI Symbol;Acc:MGI:1344408]
B cells	Ctsc	3.23e-17	0.0510865	0.674	0.656	5.22e-13	cathepsin C [Source:MGI Symbol;Acc:MGI:109553]
B cells	Arl5c	3.52e-17	0.137526	0.276	0.21	5.68e-13	ADP-ribosylation factor-like 5C [Source:MGI Symbol;Acc:MGI:3028577]
B cells	Rwdd1	3.79e-17	0.108799	0.452	0.408	6.12e-13	RWD domain containing 1 [Source:MGI Symbol;Acc:MGI:1913771]
B cells	Arhgef18	3.98e-17	0.0786581	0.431	0.39	6.43e-13	rho/rac guanine nucleotide exchange factor (GEF) 18 [Source:MGI Symbol;Acc:MGI:2142567]
B cells	Mdh2	4.03e-17	0.0870685	0.494	0.467	6.51e-13	malate dehydrogenase 2, NAD (mitochondrial) [Source:MGI Symbol;Acc:MGI:97050]
B cells	Eapp	4.29e-17	0.0911147	0.39	0.332	6.93e-13	E2F-associated phosphoprotein [Source:MGI Symbol;Acc:MGI:1913516]
B cells	Smg6	4.47e-17	0.103234	0.361	0.305	7.22e-13	Smg-6 homolog, nonsense mediated mRNA decay factor (C. elegans) [Source:MGI Symbol;Acc:MGI:2144117]
B cells	Ero1lb	4.49e-17	0.105612	0.398	0.343	7.26e-13	NA
B cells	Capns1	4.97e-17	0.0893669	0.467	0.433	8.02e-13	calpain, small subunit 1 [Source:MGI Symbol;Acc:MGI:88266]
B cells	Psmc3	5.05e-17	0.100011	0.402	0.352	8.16e-13	proteasome (prosome, macropain) 26S subunit, ATPase 3 [Source:MGI Symbol;Acc:MGI:1098754]
B cells	Bzw2	5.34e-17	0.111545	0.315	0.282	8.64e-13	basic leucine zipper and W2 domains 2 [Source:MGI Symbol;Acc:MGI:1914162]
B cells	Ccz1	5.52e-17	0.0976094	0.388	0.327	8.92e-13	CCZ1 vacuolar protein trafficking and biogenesis associated [Source:MGI Symbol;Acc:MGI:2141070]
B cells	Rfc2	5.77e-17	0.0887937	0.411	0.388	9.33e-13	replication factor C (activator 1) 2 [Source:MGI Symbol;Acc:MGI:1341868]
B cells	Cwf19l2	5.79e-17	0.0884065	0.432	0.387	9.36e-13	CWF19-like 2, cell cycle control (S. pombe) [Source:MGI Symbol;Acc:MGI:1918023]
B cells	Acbd6	5.93e-17	0.110693	0.309	0.242	9.58e-13	acyl-Coenzyme A binding domain containing 6 [Source:MGI Symbol;Acc:MGI:1919732]
B cells	Gpr18	5.93e-17	0.0921513	0.425	0.376	9.58e-13	G protein-coupled receptor 18 [Source:MGI Symbol;Acc:MGI:107859]
B cells	Txndc9	6.25e-17	0.0845203	0.382	0.328	1.01e-12	thioredoxin domain containing 9 [Source:MGI Symbol;Acc:MGI:2138153]
B cells	Dctn2	6.63e-17	0.110535	0.3	0.236	1.07e-12	dynactin 2 [Source:MGI Symbol;Acc:MGI:107733]
B cells	Asna1	6.81e-17	0.185841	0.255	0.141	1.1e-12	NA
B cells	Pnisr	7.03e-17	-0.0279966	0.857	0.86	1.14e-12	PNN interacting serine/arginine-rich [Source:MGI Symbol;Acc:MGI:1913875]
B cells	Arhgef1	7.04e-17	0.0373937	0.855	0.847	1.14e-12	Rho guanine nucleotide exchange factor (GEF) 1 [Source:MGI Symbol;Acc:MGI:1353510]
B cells	Rnps1	7.13e-17	0.0901233	0.463	0.419	1.15e-12	RNA binding protein with serine rich domain 1 [Source:MGI Symbol;Acc:MGI:97960]
B cells	Map2k2	7.41e-17	0.0990198	0.457	0.419	1.2e-12	mitogen-activated protein kinase kinase 2 [Source:MGI Symbol;Acc:MGI:1346867]
B cells	2810013P06Rik	7.58e-17	0.130601	0.276	0.202	1.22e-12	RIKEN cDNA 2810013P06 gene [Source:MGI Symbol;Acc:MGI:1914456]
B cells	Pts	8.1e-17	0.0976099	0.398	0.345	1.31e-12	6-pyruvoyl-tetrahydropterin synthase [Source:MGI Symbol;Acc:MGI:1338783]
B cells	Zfp36l1	8.17e-17	-0.129565	0.885	0.928	1.32e-12	zinc finger protein 36, C3H type-like 1 [Source:MGI Symbol;Acc:MGI:107946]
B cells	Bnip3l	8.69e-17	0.0986847	0.421	0.386	1.4e-12	BCL2/adenovirus E1B interacting protein 3-like [Source:MGI Symbol;Acc:MGI:1332659]
B cells	Tnrc6b	9.15e-17	0.043302	0.777	0.756	1.48e-12	trinucleotide repeat containing 6b [Source:MGI Symbol;Acc:MGI:2443730]
B cells	Phb	9.17e-17	0.141395	0.256	0.186	1.48e-12	prohibitin [Source:MGI Symbol;Acc:MGI:97572]
B cells	Arl6ip4	9.77e-17	0.10022	0.34	0.268	1.58e-12	ADP-ribosylation factor-like 6 interacting protein 4 [Source:MGI Symbol;Acc:MGI:1929500]
B cells	Lmo2	9.86e-17	0.0921443	0.488	0.451	1.59e-12	LIM domain only 2 [Source:MGI Symbol;Acc:MGI:102811]
B cells	4833420G17Rik	1.01e-16	0.0868948	0.393	0.339	1.64e-12	RIKEN cDNA 4833420G17 gene [Source:MGI Symbol;Acc:MGI:1914642]
B cells	Mrpl21	1.05e-16	0.135006	0.29	0.223	1.7e-12	mitochondrial ribosomal protein L21 [Source:MGI Symbol;Acc:MGI:2660674]
B cells	Romo1	1.22e-16	0.0799991	0.575	0.554	1.97e-12	reactive oxygen species modulator 1 [Source:MGI Symbol;Acc:MGI:1914317]
B cells	Mrps21	1.26e-16	0.0899369	0.488	0.454	2.04e-12	mitochondrial ribosomal protein S21 [Source:MGI Symbol;Acc:MGI:1913542]
B cells	Tmbim6	1.28e-16	0.0593343	0.764	0.755	2.07e-12	transmembrane BAX inhibitor motif containing 6 [Source:MGI Symbol;Acc:MGI:99682]
B cells	Ascc3	1.47e-16	0.100738	0.366	0.307	2.38e-12	activating signal cointegrator 1 complex subunit 3 [Source:MGI Symbol;Acc:MGI:1925237]
B cells	Erp44	1.5e-16	0.0891655	0.402	0.359	2.42e-12	endoplasmic reticulum protein 44 [Source:MGI Symbol;Acc:MGI:1923549]
B cells	Svbp	1.55e-16	0.107	0.305	0.239	2.51e-12	small vasohibin binding protein [Source:MGI Symbol;Acc:MGI:1916466]
B cells	Epsti1	1.56e-16	0.101026	0.379	0.335	2.53e-12	epithelial stromal interaction 1 (breast) [Source:MGI Symbol;Acc:MGI:1915168]
B cells	Rps27rt	1.59e-16	0.10349	0.731	0.711	2.57e-12	ribosomal protein S27, retrogene [Source:MGI Symbol;Acc:MGI:3704345]
B cells	Arf6	1.59e-16	0.0843941	0.445	0.403	2.58e-12	ADP-ribosylation factor 6 [Source:MGI Symbol;Acc:MGI:99435]
B cells	Dnaja2	1.65e-16	0.0761785	0.488	0.472	2.66e-12	DnaJ heat shock protein family (Hsp40) member A2 [Source:MGI Symbol;Acc:MGI:1931882]
B cells	Scd2	1.66e-16	-0.336482	0.311	0.459	2.68e-12	stearoyl-Coenzyme A desaturase 2 [Source:MGI Symbol;Acc:MGI:98240]
B cells	Serp1	1.71e-16	-0.0290361	0.87	0.899	2.76e-12	stress-associated endoplasmic reticulum protein 1 [Source:MGI Symbol;Acc:MGI:92638]
B cells	Eif1ax	1.79e-16	0.0993322	0.366	0.319	2.89e-12	eukaryotic translation initiation factor 1A, X-linked [Source:MGI Symbol;Acc:MGI:1913485]
B cells	Txnl4a	1.84e-16	0.103218	0.329	0.274	2.98e-12	thioredoxin-like 4A [Source:MGI Symbol;Acc:MGI:1351613]
B cells	Micos10	1.85e-16	0.0825497	0.603	0.565	2.98e-12	mitochondrial contact site and cristae organizing system subunit 10 [Source:MGI Symbol;Acc:MGI:1913628]
B cells	Rtf1	1.86e-16	0.0749861	0.528	0.489	3.01e-12	RTF1, Paf1/RNA polymerase II complex component [Source:MGI Symbol;Acc:MGI:1309480]
B cells	Cytip	1.96e-16	0.0905155	0.508	0.469	3.17e-12	cytohesin 1 interacting protein [Source:MGI Symbol;Acc:MGI:2183535]
B cells	Ifi209	2.03e-16	0.07881	0.582	0.57	3.28e-12	interferon activated gene 209 [Source:MGI Symbol;Acc:MGI:2138243]
B cells	Nap1l1	2.03e-16	-0.0601567	0.862	0.895	3.29e-12	nucleosome assembly protein 1-like 1 [Source:MGI Symbol;Acc:MGI:1855693]
B cells	Brd1	2.05e-16	0.0889285	0.473	0.441	3.31e-12	bromodomain containing 1 [Source:MGI Symbol;Acc:MGI:1924161]
B cells	Ten1	2.15e-16	0.126946	0.277	0.203	3.47e-12	TEN1 telomerase capping complex subunit [Source:MGI Symbol;Acc:MGI:1916785]
B cells	Lat2	2.24e-16	0.0818352	0.537	0.508	3.62e-12	linker for activation of T cells family, member 2 [Source:MGI Symbol;Acc:MGI:1926479]
B cells	Rps27l	2.33e-16	0.0733345	0.551	0.538	3.76e-12	ribosomal protein S27-like [Source:MGI Symbol;Acc:MGI:1915191]
B cells	Il9r	2.36e-16	0.12837	0.279	0.224	3.82e-12	interleukin 9 receptor [Source:MGI Symbol;Acc:MGI:96564]
B cells	Jtb	2.44e-16	0.0966672	0.448	0.39	3.94e-12	jumping translocation breakpoint [Source:MGI Symbol;Acc:MGI:1346082]
B cells	Atp6v1e1	2.5e-16	0.103795	0.32	0.251	4.03e-12	ATPase, H+ transporting, lysosomal V1 subunit E1 [Source:MGI Symbol;Acc:MGI:894326]
B cells	Smim4	2.65e-16	0.168381	0.249	0.15	4.28e-12	small integral membrane protein 4 [Source:MGI Symbol;Acc:MGI:1913737]
B cells	Rpgrip1	2.69e-16	0.0796602	0.389	0.349	4.35e-12	retinitis pigmentosa GTPase regulator interacting protein 1 [Source:MGI Symbol;Acc:MGI:1932134]
B cells	Srsf3	2.71e-16	-0.000848945	0.827	0.85	4.37e-12	serine and arginine-rich splicing factor 3 [Source:MGI Symbol;Acc:MGI:98285]
B cells	Nsmce4a	2.95e-16	0.0878379	0.424	0.365	4.77e-12	NSE4 homolog A, SMC5-SMC6 complex component [Source:MGI Symbol;Acc:MGI:1915122]
B cells	Rsrc1	2.99e-16	0.116782	0.299	0.218	4.84e-12	arginine/serine-rich coiled-coil 1 [Source:MGI Symbol;Acc:MGI:1914130]
B cells	Pml	3.06e-16	0.0764882	0.634	0.6	4.95e-12	promyelocytic leukemia [Source:MGI Symbol;Acc:MGI:104662]
B cells	Oxa1l	3.16e-16	0.0827637	0.382	0.33	5.11e-12	oxidase assembly 1-like [Source:MGI Symbol;Acc:MGI:1916339]
B cells	Prdx6	3.18e-16	0.100916	0.318	0.266	5.13e-12	peroxiredoxin 6 [Source:MGI Symbol;Acc:MGI:894320]
B cells	Llph	3.29e-16	0.0597645	0.613	0.595	5.32e-12	LLP homolog, long-term synaptic facilitation (Aplysia) [Source:MGI Symbol;Acc:MGI:1913475]
B cells	Pop5	3.31e-16	0.0952295	0.344	0.292	5.35e-12	processing of precursor 5, ribonuclease P/MRP family (S. cerevisiae) [Source:MGI Symbol;Acc:MGI:2151221]
B cells	Iscu	3.62e-16	0.102809	0.32	0.256	5.85e-12	iron-sulfur cluster assembly enzyme [Source:MGI Symbol;Acc:MGI:1913633]
B cells	Rfc1	3.77e-16	0.0996638	0.318	0.275	6.1e-12	replication factor C (activator 1) 1 [Source:MGI Symbol;Acc:MGI:97891]
B cells	Psmb7	3.83e-16	0.105078	0.333	0.287	6.2e-12	proteasome (prosome, macropain) subunit, beta type 7 [Source:MGI Symbol;Acc:MGI:107637]
B cells	Cct4	3.89e-16	0.0446924	0.568	0.577	6.28e-12	chaperonin containing Tcp1, subunit 4 (delta) [Source:MGI Symbol;Acc:MGI:104689]
B cells	Hint3	3.93e-16	0.113868	0.292	0.227	6.35e-12	histidine triad nucleotide binding protein 3 [Source:MGI Symbol;Acc:MGI:1914097]
B cells	Utp3	3.99e-16	0.0779472	0.471	0.455	6.44e-12	UTP3 small subunit processome component [Source:MGI Symbol;Acc:MGI:1919230]
B cells	mt-Nd6	4.12e-16	0.0988691	0.312	0.268	6.66e-12	mitochondrially encoded NADH dehydrogenase 6 [Source:MGI Symbol;Acc:MGI:102495]
B cells	Bcap29	4.23e-16	0.135867	0.266	0.207	6.83e-12	B cell receptor associated protein 29 [Source:MGI Symbol;Acc:MGI:101917]
B cells	Crebzf	4.33e-16	0.0943665	0.392	0.324	7e-12	CREB/ATF bZIP transcription factor [Source:MGI Symbol;Acc:MGI:2675296]
B cells	Scfd1	4.34e-16	0.10611	0.285	0.231	7.02e-12	Sec1 family domain containing 1 [Source:MGI Symbol;Acc:MGI:1924233]
B cells	Dmac2	4.4e-16	0.100353	0.336	0.28	7.1e-12	distal membrane arm assembly complex 2 [Source:MGI Symbol;Acc:MGI:1913599]
B cells	Pdcd6	4.61e-16	0.0900579	0.358	0.304	7.46e-12	programmed cell death 6 [Source:MGI Symbol;Acc:MGI:109283]
B cells	Ech1	4.61e-16	0.182123	0.239	0.136	7.46e-12	enoyl coenzyme A hydratase 1, peroxisomal [Source:MGI Symbol;Acc:MGI:1858208]
B cells	Polr2g	5.28e-16	0.0951281	0.374	0.33	8.53e-12	polymerase (RNA) II (DNA directed) polypeptide G [Source:MGI Symbol;Acc:MGI:1914960]
B cells	Mrps36	5.41e-16	0.103136	0.315	0.265	8.73e-12	mitochondrial ribosomal protein S36 [Source:MGI Symbol;Acc:MGI:1913378]
B cells	Rnf7	5.65e-16	0.0993593	0.355	0.301	9.13e-12	ring finger protein 7 [Source:MGI Symbol;Acc:MGI:1337096]
B cells	Mkrn1	5.72e-16	0.0867212	0.39	0.34	9.24e-12	makorin, ring finger protein, 1 [Source:MGI Symbol;Acc:MGI:1859353]
B cells	Mfsd10	6.13e-16	0.146585	0.249	0.176	9.9e-12	major facilitator superfamily domain containing 10 [Source:MGI Symbol;Acc:MGI:1915544]
B cells	Cox6a1	6.27e-16	0.0653492	0.67	0.654	1.01e-11	cytochrome c oxidase subunit 6A1 [Source:MGI Symbol;Acc:MGI:103099]
B cells	Cox20	6.75e-16	0.097772	0.321	0.273	1.09e-11	cytochrome c oxidase assembly protein 20 [Source:MGI Symbol;Acc:MGI:1913609]
B cells	Ankrd12	6.9e-16	-0.001283	0.744	0.746	1.12e-11	ankyrin repeat domain 12 [Source:MGI Symbol;Acc:MGI:1914357]
B cells	Sh3gl1	6.93e-16	0.0883974	0.375	0.329	1.12e-11	SH3-domain GRB2-like 1 [Source:MGI Symbol;Acc:MGI:700010]
B cells	Slirp	7.41e-16	0.12066	0.289	0.214	1.2e-11	SRA stem-loop interacting RNA binding protein [Source:MGI Symbol;Acc:MGI:1916394]
B cells	Cntrl	7.43e-16	0.0888818	0.517	0.471	1.2e-11	centriolin [Source:MGI Symbol;Acc:MGI:1889576]
B cells	Tcf4	7.54e-16	-0.0928017	0.86	0.877	1.22e-11	transcription factor 4 [Source:MGI Symbol;Acc:MGI:98506]
B cells	Pdia6	7.98e-16	0.109282	0.494	0.461	1.29e-11	protein disulfide isomerase associated 6 [Source:MGI Symbol;Acc:MGI:1919103]
B cells	Psmc4	8.05e-16	0.111726	0.288	0.216	1.3e-11	proteasome (prosome, macropain) 26S subunit, ATPase, 4 [Source:MGI Symbol;Acc:MGI:1346093]
B cells	Lmbrd1	8.77e-16	0.0767467	0.459	0.432	1.42e-11	LMBR1 domain containing 1 [Source:MGI Symbol;Acc:MGI:1915671]
B cells	Mysm1	1.01e-15	0.0829441	0.431	0.386	1.63e-11	myb-like, SWIRM and MPN domains 1 [Source:MGI Symbol;Acc:MGI:2444584]
B cells	Cbfa2t3	1.01e-15	-0.360667	0.458	0.573	1.64e-11	CBFA2/RUNX1 translocation partner 3 [Source:MGI Symbol;Acc:MGI:1338013]
B cells	Mast4	1.03e-15	0.0690997	0.467	0.428	1.66e-11	microtubule associated serine/threonine kinase family member 4 [Source:MGI Symbol;Acc:MGI:1918885]
B cells	Emc3	1.03e-15	0.103897	0.306	0.242	1.66e-11	ER membrane protein complex subunit 3 [Source:MGI Symbol;Acc:MGI:1913337]
B cells	Zfp706	1.07e-15	0.0261233	0.725	0.736	1.73e-11	zinc finger protein 706 [Source:MGI Symbol;Acc:MGI:1915286]
B cells	Mrpl36	1.08e-15	0.095579	0.356	0.302	1.74e-11	mitochondrial ribosomal protein L36 [Source:MGI Symbol;Acc:MGI:2137228]
B cells	Ddx27	1.11e-15	0.100654	0.332	0.287	1.8e-11	DEAD box helicase 27 [Source:MGI Symbol;Acc:MGI:2385884]
B cells	Spag9	1.13e-15	0.089211	0.547	0.514	1.82e-11	sperm associated antigen 9 [Source:MGI Symbol;Acc:MGI:1918084]
B cells	Slamf6	1.13e-15	0.0600155	0.606	0.581	1.82e-11	SLAM family member 6 [Source:MGI Symbol;Acc:MGI:1353620]
B cells	Pdcd2l	1.2e-15	0.133785	0.269	0.214	1.93e-11	programmed cell death 2-like [Source:MGI Symbol;Acc:MGI:1915329]
B cells	Cyfip1	1.21e-15	0.0996903	0.358	0.327	1.95e-11	cytoplasmic FMR1 interacting protein 1 [Source:MGI Symbol;Acc:MGI:1338801]
B cells	Uqcc3	1.29e-15	0.082386	0.411	0.361	2.08e-11	ubiquinol-cytochrome c reductase complex assembly factor 3 [Source:MGI Symbol;Acc:MGI:2147553]
B cells	Ak2	1.31e-15	0.0810794	0.42	0.384	2.11e-11	adenylate kinase 2 [Source:MGI Symbol;Acc:MGI:87978]
B cells	Ift20	1.32e-15	0.0930548	0.328	0.279	2.13e-11	intraflagellar transport 20 [Source:MGI Symbol;Acc:MGI:1915585]
B cells	Fam193a	1.37e-15	0.079101	0.39	0.344	2.21e-11	family with sequence homology 193, member A [Source:MGI Symbol;Acc:MGI:2447768]
B cells	Actr10	1.38e-15	0.102028	0.307	0.246	2.23e-11	ARP10 actin-related protein 10 [Source:MGI Symbol;Acc:MGI:1891654]
B cells	Srsf2	1.42e-15	0.0133471	0.716	0.727	2.29e-11	serine and arginine-rich splicing factor 2 [Source:MGI Symbol;Acc:MGI:98284]
B cells	Pkp3	1.56e-15	0.13622	0.262	0.186	2.52e-11	plakophilin 3 [Source:MGI Symbol;Acc:MGI:1891830]
B cells	Nsrp1	1.7e-15	0.0939581	0.341	0.302	2.74e-11	nuclear speckle regulatory protein 1 [Source:MGI Symbol;Acc:MGI:2144305]
B cells	Dnajc15	1.72e-15	0.149582	0.249	0.16	2.78e-11	DnaJ heat shock protein family (Hsp40) member C15 [Source:MGI Symbol;Acc:MGI:1913398]
B cells	Mak16	1.8e-15	0.085969	0.374	0.324	2.91e-11	MAK16 homolog [Source:MGI Symbol;Acc:MGI:1915170]
B cells	Ndufaf8	1.8e-15	0.0848886	0.394	0.354	2.91e-11	NADH:ubiquinone oxidoreductase complex assembly factor 8 [Source:MGI Symbol;Acc:MGI:1913676]
B cells	Arhgap17	1.8e-15	0.0728476	0.754	0.733	2.91e-11	Rho GTPase activating protein 17 [Source:MGI Symbol;Acc:MGI:1917747]
B cells	Rab11fip2	1.85e-15	0.127535	0.26	0.193	2.98e-11	RAB11 family interacting protein 2 (class I) [Source:MGI Symbol;Acc:MGI:1922248]
B cells	Vmp1	1.97e-15	0.0929454	0.349	0.319	3.18e-11	vacuole membrane protein 1 [Source:MGI Symbol;Acc:MGI:1923159]
B cells	Akap9	2.03e-15	0.0727654	0.543	0.507	3.28e-11	A kinase (PRKA) anchor protein (yotiao) 9 [Source:MGI Symbol;Acc:MGI:2178217]
B cells	Sars	2.04e-15	0.087149	0.398	0.375	3.29e-11	seryl-aminoacyl-tRNA synthetase [Source:MGI Symbol;Acc:MGI:102809]
B cells	Exoc3	2.17e-15	0.0915523	0.326	0.285	3.5e-11	exocyst complex component 3 [Source:MGI Symbol;Acc:MGI:2443972]
B cells	Sptssa	2.2e-15	0.0907229	0.338	0.29	3.55e-11	serine palmitoyltransferase, small subunit A [Source:MGI Symbol;Acc:MGI:1913399]
B cells	Srek1	2.27e-15	0.0803925	0.423	0.383	3.67e-11	splicing regulatory glutamine/lysine-rich protein 1 [Source:MGI Symbol;Acc:MGI:2145245]
B cells	Nudt21	2.38e-15	0.084025	0.407	0.383	3.85e-11	nudix (nucleoside diphosphate linked moiety X)-type motif 21 [Source:MGI Symbol;Acc:MGI:1915469]
B cells	1110008P14Rik	2.38e-15	0.0970366	0.315	0.252	3.85e-11	RIKEN cDNA 1110008P14 gene [Source:MGI Symbol;Acc:MGI:1920987]
B cells	R3hdm2	2.4e-15	0.0891815	0.337	0.284	3.87e-11	R3H domain containing 2 [Source:MGI Symbol;Acc:MGI:1919000]
B cells	Ppil4	2.43e-15	0.0896838	0.347	0.296	3.93e-11	peptidylprolyl isomerase (cyclophilin)-like 4 [Source:MGI Symbol;Acc:MGI:1914668]
B cells	Dleu2	2.64e-15	0.0780646	0.37	0.336	4.27e-11	deleted in lymphocytic leukemia, 2 [Source:MGI Symbol;Acc:MGI:1934030]
B cells	1810026B05Rik	2.93e-15	0.0802554	0.546	0.507	4.74e-11	NA
B cells	Pkib	2.96e-15	0.0981711	0.347	0.319	4.78e-11	protein kinase inhibitor beta, cAMP dependent, testis specific [Source:MGI Symbol;Acc:MGI:101937]
B cells	Tnfaip8	3e-15	0.0337634	0.687	0.701	4.85e-11	tumor necrosis factor, alpha-induced protein 8 [Source:MGI Symbol;Acc:MGI:2147191]
B cells	Pcif1	3.33e-15	0.0857795	0.343	0.291	5.39e-11	phosphorylated CTD interacting factor 1 [Source:MGI Symbol;Acc:MGI:2443858]
B cells	Lars	3.41e-15	0.100382	0.3	0.264	5.51e-11	leucyl-tRNA synthetase [Source:MGI Symbol;Acc:MGI:1913808]
B cells	Nudcd3	3.48e-15	0.0672173	0.516	0.476	5.63e-11	NudC domain containing 3 [Source:MGI Symbol;Acc:MGI:2144158]
B cells	Rnf130	3.75e-15	0.0876879	0.346	0.301	6.05e-11	ring finger protein 130 [Source:MGI Symbol;Acc:MGI:1891717]
B cells	Paip2	3.77e-15	0.0535273	0.58	0.578	6.09e-11	polyadenylate-binding protein-interacting protein 2 [Source:MGI Symbol;Acc:MGI:1915119]
B cells	Mrps15	3.92e-15	0.0915032	0.311	0.257	6.34e-11	mitochondrial ribosomal protein S15 [Source:MGI Symbol;Acc:MGI:1913657]
B cells	Gimap9	4.03e-15	0.0794874	0.415	0.38	6.5e-11	GTPase, IMAP family member 9 [Source:MGI Symbol;Acc:MGI:3511744]
B cells	Cdk4	4.07e-15	0.102716	0.355	0.323	6.58e-11	cyclin-dependent kinase 4 [Source:MGI Symbol;Acc:MGI:88357]
B cells	C1d	4.28e-15	0.119564	0.278	0.208	6.92e-11	C1D nuclear receptor co-repressor [Source:MGI Symbol;Acc:MGI:1927354]
B cells	Itgb1	4.32e-15	0.0912926	0.467	0.456	6.99e-11	integrin beta 1 (fibronectin receptor beta) [Source:MGI Symbol;Acc:MGI:96610]
B cells	Metap2	4.5e-15	0.059842	0.549	0.53	7.26e-11	methionine aminopeptidase 2 [Source:MGI Symbol;Acc:MGI:1929701]
B cells	Ypel3	4.53e-15	0.0605202	0.484	0.463	7.32e-11	yippee like 3 [Source:MGI Symbol;Acc:MGI:1913340]
B cells	Pcmt1	4.61e-15	0.0883284	0.402	0.346	7.45e-11	protein-L-isoaspartate (D-aspartate) O-methyltransferase 1 [Source:MGI Symbol;Acc:MGI:97502]
B cells	Tmem147	4.85e-15	0.132429	0.252	0.183	7.84e-11	transmembrane protein 147 [Source:MGI Symbol;Acc:MGI:1915011]
B cells	Evi2a	4.89e-15	0.11186	0.31	0.264	7.9e-11	ecotropic viral integration site 2a [Source:MGI Symbol;Acc:MGI:95458]
B cells	Ddost	4.9e-15	0.0863749	0.33	0.275	7.92e-11	dolichyl-di-phosphooligosaccharide-protein glycotransferase [Source:MGI Symbol;Acc:MGI:1194508]
B cells	Ddx50	4.93e-15	0.0702356	0.538	0.509	7.97e-11	DExD box helicase 50 [Source:MGI Symbol;Acc:MGI:2182303]
B cells	Tmem208	5.06e-15	0.0848928	0.35	0.294	8.17e-11	transmembrane protein 208 [Source:MGI Symbol;Acc:MGI:1913570]
B cells	Polr2l	5.11e-15	0.0928242	0.338	0.289	8.25e-11	polymerase (RNA) II (DNA directed) polypeptide L [Source:MGI Symbol;Acc:MGI:1913741]
B cells	Zbtb8os	5.12e-15	0.111784	0.274	0.212	8.27e-11	zinc finger and BTB domain containing 8 opposite strand [Source:MGI Symbol;Acc:MGI:1914356]
B cells	Tuba1a	5.18e-15	0.144152	0.243	0.163	8.38e-11	tubulin, alpha 1A [Source:MGI Symbol;Acc:MGI:98869]
B cells	Ptpn6	5.25e-15	0.0029933	0.833	0.854	8.48e-11	protein tyrosine phosphatase, non-receptor type 6 [Source:MGI Symbol;Acc:MGI:96055]
B cells	Arid4b	5.29e-15	0.0401914	0.627	0.63	8.55e-11	AT rich interactive domain 4B (RBP1-like) [Source:MGI Symbol;Acc:MGI:2137512]
B cells	Man1a	5.35e-15	-0.0201963	0.894	0.884	8.65e-11	mannosidase 1, alpha [Source:MGI Symbol;Acc:MGI:104677]
B cells	Id3	5.39e-15	0.108685	0.308	0.264	8.7e-11	inhibitor of DNA binding 3 [Source:MGI Symbol;Acc:MGI:96398]
B cells	Commd6	5.53e-15	0.0869565	0.338	0.298	8.93e-11	COMM domain containing 6 [Source:MGI Symbol;Acc:MGI:1913450]
B cells	Fubp1	5.77e-15	-0.0141579	0.826	0.831	9.32e-11	far upstream element (FUSE) binding protein 1 [Source:MGI Symbol;Acc:MGI:1196294]
B cells	Chchd3	5.88e-15	0.0929409	0.321	0.267	9.5e-11	coiled-coil-helix-coiled-coil-helix domain containing 3 [Source:MGI Symbol;Acc:MGI:1913325]
B cells	Rbmxl1	5.94e-15	0.0885641	0.326	0.287	9.59e-11	RNA binding motif protein, X-linked like-1 [Source:MGI Symbol;Acc:MGI:1343045]
B cells	Scamp2	6.51e-15	0.0749029	0.404	0.376	1.05e-10	secretory carrier membrane protein 2 [Source:MGI Symbol;Acc:MGI:1346518]
B cells	H2afv	6.98e-15	0.0875758	0.504	0.48	1.13e-10	NA
B cells	Psmc6	7.34e-15	0.0823535	0.355	0.304	1.19e-10	proteasome (prosome, macropain) 26S subunit, ATPase, 6 [Source:MGI Symbol;Acc:MGI:1914339]
B cells	Ergic3	7.43e-15	0.103411	0.297	0.227	1.2e-10	ERGIC and golgi 3 [Source:MGI Symbol;Acc:MGI:1913616]
B cells	Atp5a1	8.02e-15	0.00872384	0.78	0.805	1.3e-10	ATP synthase, H+ transporting, mitochondrial F1 complex, alpha subunit 1 [Source:MGI Symbol;Acc:MGI:88115]
B cells	Unc50	8.32e-15	0.093517	0.299	0.227	1.34e-10	unc-50 homolog [Source:MGI Symbol;Acc:MGI:1914637]
B cells	Tmod3	8.35e-15	0.0585528	0.665	0.646	1.35e-10	tropomodulin 3 [Source:MGI Symbol;Acc:MGI:1355315]
B cells	Cnp	8.6e-15	0.0399104	0.568	0.557	1.39e-10	2',3'-cyclic nucleotide 3' phosphodiesterase [Source:MGI Symbol;Acc:MGI:88437]
B cells	Bola3	8.67e-15	0.0973504	0.305	0.243	1.4e-10	bolA-like 3 (E. coli) [Source:MGI Symbol;Acc:MGI:1925903]
B cells	Parp14	8.76e-15	0.0846126	0.406	0.379	1.42e-10	poly (ADP-ribose) polymerase family, member 14 [Source:MGI Symbol;Acc:MGI:1919489]
B cells	Prdx3	9.01e-15	0.105505	0.294	0.245	1.46e-10	peroxiredoxin 3 [Source:MGI Symbol;Acc:MGI:88034]
B cells	Cdc40	9.31e-15	0.0703568	0.427	0.389	1.5e-10	cell division cycle 40 [Source:MGI Symbol;Acc:MGI:1918963]
B cells	Naa38	9.4e-15	0.0952332	0.308	0.258	1.52e-10	N(alpha)-acetyltransferase 38, NatC auxiliary subunit [Source:MGI Symbol;Acc:MGI:1925554]
B cells	Scd1	9.44e-15	-0.330524	0.722	0.82	1.53e-10	stearoyl-Coenzyme A desaturase 1 [Source:MGI Symbol;Acc:MGI:98239]
B cells	Utp11	9.51e-15	0.0857683	0.305	0.266	1.54e-10	UTP11 small subunit processome component [Source:MGI Symbol;Acc:MGI:1914455]
B cells	Sp100	9.7e-15	0.0206824	0.794	0.797	1.57e-10	nuclear antigen Sp100 [Source:MGI Symbol;Acc:MGI:109561]
B cells	Pgam1	1.01e-14	0.103291	0.395	0.357	1.63e-10	phosphoglycerate mutase 1 [Source:MGI Symbol;Acc:MGI:97552]
B cells	Mrpl24	1.07e-14	0.0742469	0.479	0.442	1.73e-10	mitochondrial ribosomal protein L24 [Source:MGI Symbol;Acc:MGI:1914957]
B cells	Arf4	1.08e-14	0.0716553	0.455	0.417	1.75e-10	ADP-ribosylation factor 4 [Source:MGI Symbol;Acc:MGI:99433]
B cells	Mrpl11	1.13e-14	0.113556	0.283	0.219	1.82e-10	mitochondrial ribosomal protein L11 [Source:MGI Symbol;Acc:MGI:2137215]
B cells	Dynlrb1	1.15e-14	0.0801144	0.382	0.358	1.85e-10	dynein light chain roadblock-type 1 [Source:MGI Symbol;Acc:MGI:1914318]
B cells	Pdcd2	1.22e-14	0.130839	0.26	0.176	1.98e-10	programmed cell death 2 [Source:MGI Symbol;Acc:MGI:104643]
B cells	Zcrb1	1.23e-14	0.0825297	0.406	0.367	1.98e-10	zinc finger CCHC-type and RNA binding motif 1 [Source:MGI Symbol;Acc:MGI:1914447]
B cells	H2-DMb1	1.25e-14	0.0786116	0.524	0.48	2.01e-10	histocompatibility 2, class II, locus Mb1 [Source:MGI Symbol;Acc:MGI:95922]
B cells	Snrpa1	1.32e-14	0.108874	0.285	0.239	2.14e-10	small nuclear ribonucleoprotein polypeptide A' [Source:MGI Symbol;Acc:MGI:1916231]
B cells	Pgk1	1.38e-14	0.0915188	0.413	0.409	2.23e-10	phosphoglycerate kinase 1 [Source:MGI Symbol;Acc:MGI:97555]
B cells	Pak2	1.41e-14	0.0519527	0.68	0.669	2.28e-10	p21 (RAC1) activated kinase 2 [Source:MGI Symbol;Acc:MGI:1339984]
B cells	Rsbn1	1.55e-14	0.0799412	0.398	0.345	2.51e-10	rosbin, round spermatid basic protein 1 [Source:MGI Symbol;Acc:MGI:2444993]
B cells	BC004004	1.56e-14	0.0829863	0.372	0.335	2.52e-10	cDNA sequence BC004004 [Source:MGI Symbol;Acc:MGI:2136782]
B cells	Chfr	1.57e-14	0.0751663	0.341	0.293	2.54e-10	checkpoint with forkhead and ring finger domains [Source:MGI Symbol;Acc:MGI:2444898]
B cells	BC005537	1.58e-14	-0.25288	0.611	0.717	2.55e-10	cDNA sequence BC005537 [Source:MGI Symbol;Acc:MGI:2441726]
B cells	Psmb4	1.58e-14	0.075096	0.556	0.557	2.55e-10	proteasome (prosome, macropain) subunit, beta type 4 [Source:MGI Symbol;Acc:MGI:1098257]
B cells	Lrrfip1	1.58e-14	0.0839085	0.439	0.411	2.56e-10	leucine rich repeat (in FLII) interacting protein 1 [Source:MGI Symbol;Acc:MGI:1342770]
B cells	Sbds	1.62e-14	0.0697197	0.423	0.386	2.61e-10	SBDS ribosome maturation factor [Source:MGI Symbol;Acc:MGI:1913961]
B cells	Bbip1	1.62e-14	0.0793141	0.381	0.352	2.62e-10	BBSome interacting protein 1 [Source:MGI Symbol;Acc:MGI:1913610]
B cells	Sharpin	1.66e-14	0.0934331	0.294	0.239	2.68e-10	SHANK-associated RH domain interacting protein [Source:MGI Symbol;Acc:MGI:1913331]
B cells	BC005624	1.7e-14	0.0722197	0.425	0.387	2.75e-10	cDNA sequence BC005624 [Source:MGI Symbol;Acc:MGI:2385132]
B cells	Sdhaf1	1.75e-14	0.125216	0.256	0.189	2.84e-10	succinate dehydrogenase complex assembly factor 1 [Source:MGI Symbol;Acc:MGI:1915582]
B cells	Phf5a	1.77e-14	0.0854441	0.35	0.31	2.86e-10	PHD finger protein 5A [Source:MGI Symbol;Acc:MGI:2156864]
B cells	Chmp3	1.81e-14	0.0907618	0.289	0.238	2.92e-10	charged multivesicular body protein 3 [Source:MGI Symbol;Acc:MGI:1913950]
B cells	Cmah	1.81e-14	0.0952647	0.582	0.538	2.93e-10	cytidine monophospho-N-acetylneuraminic acid hydroxylase [Source:MGI Symbol;Acc:MGI:103227]
B cells	Rnf111	2.04e-14	0.0737408	0.57	0.54	3.29e-10	ring finger 111 [Source:MGI Symbol;Acc:MGI:1934919]
B cells	Ola1	2.19e-14	0.0888775	0.334	0.305	3.54e-10	Obg-like ATPase 1 [Source:MGI Symbol;Acc:MGI:1914309]
B cells	Ube2n	2.22e-14	0.0720634	0.394	0.36	3.59e-10	ubiquitin-conjugating enzyme E2N [Source:MGI Symbol;Acc:MGI:1934835]
B cells	9930111J21Rik2	2.38e-14	0.0118336	0.82	0.833	3.84e-10	RIKEN cDNA 9930111J21 gene 2 [Source:MGI Symbol;Acc:MGI:3711310]
B cells	Eif4h	2.51e-14	0.0647933	0.512	0.477	4.06e-10	eukaryotic translation initiation factor 4H [Source:MGI Symbol;Acc:MGI:1341822]
B cells	Timm17a	2.53e-14	0.10091	0.289	0.23	4.09e-10	translocase of inner mitochondrial membrane 17a [Source:MGI Symbol;Acc:MGI:1343131]
B cells	Zmat5	2.62e-14	0.146174	0.238	0.152	4.23e-10	zinc finger, matrin type 5 [Source:MGI Symbol;Acc:MGI:1914428]
B cells	Pabpc1	2.7e-14	-0.17736	0.951	0.972	4.36e-10	poly(A) binding protein, cytoplasmic 1 [Source:MGI Symbol;Acc:MGI:1349722]
B cells	Dock10	2.75e-14	0.00846024	0.794	0.813	4.44e-10	dedicator of cytokinesis 10 [Source:MGI Symbol;Acc:MGI:2146320]
B cells	Eml4	2.81e-14	0.0717141	0.606	0.596	4.54e-10	echinoderm microtubule associated protein like 4 [Source:MGI Symbol;Acc:MGI:1926048]
B cells	Mrpl14	2.94e-14	0.0892485	0.285	0.238	4.74e-10	mitochondrial ribosomal protein L14 [Source:MGI Symbol;Acc:MGI:1333864]
B cells	Ptp4a3	3.13e-14	0.0185911	0.69	0.686	5.05e-10	protein tyrosine phosphatase 4a3 [Source:MGI Symbol;Acc:MGI:1277098]
B cells	Csk	3.24e-14	0.0118735	0.75	0.769	5.23e-10	c-src tyrosine kinase [Source:MGI Symbol;Acc:MGI:88537]
B cells	Sugt1	3.34e-14	0.0685384	0.399	0.362	5.39e-10	SGT1, suppressor of G2 allele of SKP1 (S. cerevisiae) [Source:MGI Symbol;Acc:MGI:1915205]
B cells	Hcls1	3.53e-14	0.0343455	0.676	0.696	5.71e-10	hematopoietic cell specific Lyn substrate 1 [Source:MGI Symbol;Acc:MGI:104568]
B cells	Cript	3.56e-14	0.0863275	0.332	0.278	5.76e-10	cysteine-rich PDZ-binding protein [Source:MGI Symbol;Acc:MGI:1929655]
B cells	Med28	3.6e-14	0.0775955	0.404	0.371	5.81e-10	mediator complex subunit 28 [Source:MGI Symbol;Acc:MGI:1914249]
B cells	Was	3.65e-14	0.0721599	0.434	0.4	5.91e-10	Wiskott-Aldrich syndrome [Source:MGI Symbol;Acc:MGI:105059]
B cells	Atg3	3.67e-14	0.0901473	0.298	0.251	5.93e-10	autophagy related 3 [Source:MGI Symbol;Acc:MGI:1915091]
B cells	Gm26917	3.7e-14	-0.420528	0.73	0.83	5.98e-10	NA
B cells	Ebna1bp2	3.74e-14	0.0963186	0.317	0.271	6.05e-10	EBNA1 binding protein 2 [Source:MGI Symbol;Acc:MGI:1916322]
B cells	Samhd1	3.85e-14	0.028663	0.743	0.753	6.23e-10	SAM domain and HD domain, 1 [Source:MGI Symbol;Acc:MGI:1927468]
B cells	Dbnl	3.9e-14	0.0640115	0.539	0.513	6.31e-10	drebrin-like [Source:MGI Symbol;Acc:MGI:700006]
B cells	Cenpb	4.06e-14	0.102719	0.276	0.218	6.56e-10	centromere protein B [Source:MGI Symbol;Acc:MGI:88376]
B cells	Gstp1	4.12e-14	0.174833	0.229	0.135	6.66e-10	glutathione S-transferase, pi 1 [Source:MGI Symbol;Acc:MGI:95865]
B cells	Nsd1	4.28e-14	0.0386827	0.734	0.731	6.92e-10	nuclear receptor-binding SET-domain protein 1 [Source:MGI Symbol;Acc:MGI:1276545]
B cells	Exosc5	4.33e-14	0.0875554	0.32	0.268	6.99e-10	exosome component 5 [Source:MGI Symbol;Acc:MGI:107889]
B cells	Bcas2	4.5e-14	0.0724129	0.461	0.415	7.27e-10	breast carcinoma amplified sequence 2 [Source:MGI Symbol;Acc:MGI:1915433]
B cells	Epb41l4aos	4.53e-14	0.104266	0.283	0.23	7.32e-10	erythrocyte membrane protein band 4.1 like 4a, opposite strand [Source:MGI Symbol;Acc:MGI:1916999]
B cells	Nucb2	4.62e-14	0.158707	0.231	0.152	7.46e-10	nucleobindin 2 [Source:MGI Symbol;Acc:MGI:1858179]
B cells	Gm15987	4.95e-14	0.0790216	0.562	0.552	8e-10	predicted gene 15987 [Source:MGI Symbol;Acc:MGI:3801849]
B cells	Spi1	4.96e-14	0.0745787	0.372	0.333	8.01e-10	spleen focus forming virus (SFFV) proviral integration oncogene [Source:MGI Symbol;Acc:MGI:98282]
B cells	Dnajc2	5.38e-14	0.0774931	0.45	0.429	8.69e-10	DnaJ heat shock protein family (Hsp40) member C2 [Source:MGI Symbol;Acc:MGI:99470]
B cells	Dipk1a	5.43e-14	0.102193	0.272	0.209	8.78e-10	divergent protein kinase domain 1A [Source:MGI Symbol;Acc:MGI:1914516]
B cells	Stub1	5.73e-14	0.074962	0.354	0.316	9.26e-10	STIP1 homology and U-Box containing protein 1 [Source:MGI Symbol;Acc:MGI:1891731]
B cells	Pecam1	5.74e-14	0.0851147	0.545	0.51	9.28e-10	platelet/endothelial cell adhesion molecule 1 [Source:MGI Symbol;Acc:MGI:97537]
B cells	Tmem179b	5.76e-14	0.0902441	0.294	0.242	9.3e-10	transmembrane protein 179B [Source:MGI Symbol;Acc:MGI:1914956]
B cells	Sod2	5.76e-14	0.0866662	0.291	0.248	9.3e-10	superoxide dismutase 2, mitochondrial [Source:MGI Symbol;Acc:MGI:98352]
B cells	Ssna1	6.05e-14	0.122228	0.256	0.176	9.78e-10	SS nuclear autoantigen 1 [Source:MGI Symbol;Acc:MGI:1915725]
B cells	Cd200	6.21e-14	0.127783	0.245	0.189	1e-09	CD200 antigen [Source:MGI Symbol;Acc:MGI:1196990]
B cells	Copb2	6.33e-14	0.0748729	0.354	0.315	1.02e-09	coatomer protein complex, subunit beta 2 (beta prime) [Source:MGI Symbol;Acc:MGI:1354962]
B cells	Wbp4	6.66e-14	0.0748074	0.387	0.354	1.08e-09	WW domain binding protein 4 [Source:MGI Symbol;Acc:MGI:109568]
B cells	Trim7	6.93e-14	0.0168611	0.626	0.63	1.12e-09	tripartite motif-containing 7 [Source:MGI Symbol;Acc:MGI:2137353]
B cells	Phf14	7.58e-14	0.0685349	0.499	0.466	1.22e-09	PHD finger protein 14 [Source:MGI Symbol;Acc:MGI:1923539]
B cells	Tmem126a	8.1e-14	0.111136	0.261	0.204	1.31e-09	transmembrane protein 126A [Source:MGI Symbol;Acc:MGI:1913521]
B cells	Trappc5	8.21e-14	0.0855829	0.318	0.264	1.33e-09	trafficking protein particle complex 5 [Source:MGI Symbol;Acc:MGI:1913932]
B cells	Ptms	9.09e-14	0.0775679	0.311	0.299	1.47e-09	parathymosin [Source:MGI Symbol;Acc:MGI:1916452]
B cells	Ggct	1.01e-13	0.108125	0.253	0.206	1.64e-09	gamma-glutamyl cyclotransferase [Source:MGI Symbol;Acc:MGI:95700]
B cells	Atp6v0b	1.04e-13	0.0640265	0.709	0.689	1.67e-09	ATPase, H+ transporting, lysosomal V0 subunit B [Source:MGI Symbol;Acc:MGI:1890510]
B cells	Stx7	1.05e-13	0.0564554	0.472	0.43	1.69e-09	syntaxin 7 [Source:MGI Symbol;Acc:MGI:1858210]
B cells	Prpf6	1.09e-13	0.0797624	0.302	0.252	1.76e-09	pre-mRNA splicing factor 6 [Source:MGI Symbol;Acc:MGI:1922946]
B cells	Mrps5	1.11e-13	0.115805	0.253	0.196	1.79e-09	mitochondrial ribosomal protein S5 [Source:MGI Symbol;Acc:MGI:1924971]
B cells	Osgep	1.17e-13	0.100321	0.264	0.208	1.9e-09	O-sialoglycoprotein endopeptidase [Source:MGI Symbol;Acc:MGI:1913496]
B cells	Csnk2b	1.18e-13	0.0704337	0.435	0.394	1.9e-09	casein kinase 2, beta polypeptide [Source:MGI Symbol;Acc:MGI:88548]
B cells	Apoe	1.19e-13	-0.202888	0.333	0.428	1.93e-09	apolipoprotein E [Source:MGI Symbol;Acc:MGI:88057]
B cells	Mrps17	1.2e-13	0.0877474	0.304	0.249	1.93e-09	mitochondrial ribosomal protein S17 [Source:MGI Symbol;Acc:MGI:1913508]
B cells	Ets1	1.27e-13	-0.0158491	0.836	0.845	2.06e-09	E26 avian leukemia oncogene 1, 5' domain [Source:MGI Symbol;Acc:MGI:95455]
B cells	Stx8	1.32e-13	0.141413	0.242	0.151	2.13e-09	syntaxin 8 [Source:MGI Symbol;Acc:MGI:1890156]
B cells	Znrd1	1.32e-13	0.0748079	0.337	0.289	2.14e-09	NA
B cells	Hint2	1.39e-13	0.108129	0.259	0.187	2.24e-09	histidine triad nucleotide binding protein 2 [Source:MGI Symbol;Acc:MGI:1916167]
B cells	Med10	1.41e-13	0.0938442	0.275	0.224	2.28e-09	mediator complex subunit 10 [Source:MGI Symbol;Acc:MGI:106331]
B cells	Ciao2a	1.43e-13	0.0738551	0.362	0.319	2.32e-09	cytosolic iron-sulfur assembly component 2A [Source:MGI Symbol;Acc:MGI:1915500]
B cells	Cdc42se2	1.46e-13	0.0568215	0.534	0.518	2.36e-09	CDC42 small effector 2 [Source:MGI Symbol;Acc:MGI:1919979]
B cells	Ifi35	1.49e-13	0.101355	0.265	0.21	2.41e-09	interferon-induced protein 35 [Source:MGI Symbol;Acc:MGI:1917360]
B cells	Ppp3cc	1.56e-13	0.0790521	0.311	0.271	2.52e-09	protein phosphatase 3, catalytic subunit, gamma isoform [Source:MGI Symbol;Acc:MGI:107162]
B cells	Mphosph10	1.63e-13	0.0921992	0.314	0.273	2.63e-09	M-phase phosphoprotein 10 (U3 small nucleolar ribonucleoprotein) [Source:MGI Symbol;Acc:MGI:1915223]
B cells	Ciao2b	1.71e-13	0.113186	0.25	0.189	2.77e-09	cytosolic iron-sulfur assembly component 2B [Source:MGI Symbol;Acc:MGI:1915773]
B cells	Gar1	1.74e-13	0.108075	0.276	0.233	2.81e-09	GAR1 ribonucleoprotein [Source:MGI Symbol;Acc:MGI:1930948]
B cells	Naa10	1.78e-13	0.0823443	0.304	0.26	2.88e-09	N(alpha)-acetyltransferase 10, NatA catalytic subunit [Source:MGI Symbol;Acc:MGI:1915255]
B cells	5031425E22Rik	1.84e-13	0.065423	0.384	0.347	2.97e-09	RIKEN cDNA 5031425E22 gene [Source:MGI Symbol;Acc:MGI:1923227]
B cells	Cebpz	1.84e-13	0.0632438	0.518	0.502	2.97e-09	CCAAT/enhancer binding protein zeta [Source:MGI Symbol;Acc:MGI:109386]
B cells	Nop14	1.84e-13	0.0984067	0.283	0.238	2.97e-09	NOP14 nucleolar protein [Source:MGI Symbol;Acc:MGI:1922666]
B cells	Cdk13	1.88e-13	0.0694193	0.528	0.498	3.04e-09	cyclin-dependent kinase 13 [Source:MGI Symbol;Acc:MGI:1916812]
B cells	Selenos	1.91e-13	0.0668499	0.483	0.462	3.08e-09	selenoprotein S [Source:MGI Symbol;Acc:MGI:95994]
B cells	Trappc1	1.91e-13	0.141312	0.237	0.15	3.08e-09	trafficking protein particle complex 1 [Source:MGI Symbol;Acc:MGI:1098727]
B cells	Rabgap1l	1.98e-13	0.0669977	0.63	0.606	3.2e-09	RAB GTPase activating protein 1-like [Source:MGI Symbol;Acc:MGI:1352507]
B cells	Nasp	2e-13	0.0906672	0.298	0.257	3.24e-09	nuclear autoantigenic sperm protein (histone-binding) [Source:MGI Symbol;Acc:MGI:1355328]
B cells	S1pr4	2.28e-13	0.105546	0.254	0.209	3.69e-09	sphingosine-1-phosphate receptor 4 [Source:MGI Symbol;Acc:MGI:1333809]
B cells	Hmox2	2.37e-13	0.115234	0.246	0.182	3.82e-09	heme oxygenase 2 [Source:MGI Symbol;Acc:MGI:109373]
B cells	Eif4a3	2.37e-13	0.0744229	0.31	0.269	3.83e-09	eukaryotic translation initiation factor 4A3 [Source:MGI Symbol;Acc:MGI:1923731]
B cells	Itgb7	2.39e-13	0.0866131	0.373	0.352	3.86e-09	integrin beta 7 [Source:MGI Symbol;Acc:MGI:96616]
B cells	Mplkip	2.42e-13	0.0691328	0.4	0.364	3.9e-09	M-phase specific PLK1 intereacting protein [Source:MGI Symbol;Acc:MGI:1913558]
B cells	Dcun1d5	2.54e-13	0.0583422	0.422	0.403	4.1e-09	DCN1, defective in cullin neddylation 1, domain containing 5 (S. cerevisiae) [Source:MGI Symbol;Acc:MGI:1924113]
B cells	Plaat3	2.57e-13	0.104123	0.275	0.212	4.15e-09	phospholipase A and acyltransferase 3 [Source:MGI Symbol;Acc:MGI:2179715]
B cells	Dcaf8	2.74e-13	0.0557271	0.499	0.47	4.43e-09	DDB1 and CUL4 associated factor 8 [Source:MGI Symbol;Acc:MGI:91860]
B cells	Phgdh	2.91e-13	0.0890882	0.309	0.283	4.7e-09	3-phosphoglycerate dehydrogenase [Source:MGI Symbol;Acc:MGI:1355330]
B cells	Rab18	2.97e-13	0.0920207	0.284	0.228	4.8e-09	RAB18, member RAS oncogene family [Source:MGI Symbol;Acc:MGI:102790]
B cells	Ebpl	3.13e-13	0.092615	0.275	0.221	5.06e-09	emopamil binding protein-like [Source:MGI Symbol;Acc:MGI:1915427]
B cells	Smim20	3.17e-13	0.0754073	0.307	0.274	5.11e-09	small integral membrane protein 20 [Source:MGI Symbol;Acc:MGI:1913528]
B cells	Fam76b	3.38e-13	0.0720484	0.349	0.322	5.46e-09	family with sequence similarity 76, member B [Source:MGI Symbol;Acc:MGI:1920076]
B cells	Golgb1	3.4e-13	0.0762234	0.385	0.358	5.49e-09	golgi autoantigen, golgin subfamily b, macrogolgin 1 [Source:MGI Symbol;Acc:MGI:1099447]
B cells	Tmco1	3.4e-13	0.0763536	0.369	0.341	5.49e-09	transmembrane and coiled-coil domains 1 [Source:MGI Symbol;Acc:MGI:1921173]
B cells	Gpatch8	3.41e-13	0.0597632	0.483	0.446	5.5e-09	G patch domain containing 8 [Source:MGI Symbol;Acc:MGI:1918667]
B cells	Ufm1	3.45e-13	0.0823165	0.287	0.25	5.58e-09	ubiquitin-fold modifier 1 [Source:MGI Symbol;Acc:MGI:1915140]
B cells	Igbp1	3.61e-13	0.0685876	0.361	0.324	5.83e-09	immunoglobulin (CD79A) binding protein 1 [Source:MGI Symbol;Acc:MGI:1346500]
B cells	Cdk2ap1	3.65e-13	0.0749497	0.314	0.273	5.9e-09	CDK2 (cyclin-dependent kinase 2)-associated protein 1 [Source:MGI Symbol;Acc:MGI:1202069]
B cells	Lage3	3.67e-13	0.114603	0.251	0.188	5.93e-09	L antigen family, member 3 [Source:MGI Symbol;Acc:MGI:1913442]
B cells	Snhg4	3.73e-13	0.118951	0.252	0.195	6.03e-09	small nucleolar RNA host gene 4 [Source:MGI Symbol;Acc:MGI:4937091]
B cells	Ccdc107	3.84e-13	0.124598	0.243	0.168	6.2e-09	coiled-coil domain containing 107 [Source:MGI Symbol;Acc:MGI:1913423]
B cells	Fam162a	3.85e-13	0.0954776	0.278	0.238	6.22e-09	family with sequence similarity 162, member A [Source:MGI Symbol;Acc:MGI:1917436]
B cells	Ndufb6	3.88e-13	0.0763901	0.309	0.254	6.26e-09	NADH:ubiquinone oxidoreductase subunit B6 [Source:MGI Symbol;Acc:MGI:2684983]
B cells	Tmem163	4.15e-13	0.148155	0.223	0.144	6.7e-09	transmembrane protein 163 [Source:MGI Symbol;Acc:MGI:1919410]
B cells	Iah1	4.36e-13	0.110762	0.249	0.196	7.05e-09	isoamyl acetate-hydrolyzing esterase 1 homolog [Source:MGI Symbol;Acc:MGI:1914982]
B cells	Actl6a	4.38e-13	0.0693257	0.341	0.301	7.08e-09	actin-like 6A [Source:MGI Symbol;Acc:MGI:1861453]
B cells	Apopt1	4.44e-13	0.0888452	0.28	0.229	7.17e-09	NA
B cells	Rnf167	4.57e-13	0.0599659	0.445	0.402	7.39e-09	ring finger protein 167 [Source:MGI Symbol;Acc:MGI:1917760]
B cells	Rdh12	4.72e-13	0.133577	0.224	0.169	7.63e-09	retinol dehydrogenase 12 [Source:MGI Symbol;Acc:MGI:1925224]
B cells	Rgs10	5.01e-13	0.123112	0.239	0.208	8.1e-09	regulator of G-protein signalling 10 [Source:MGI Symbol;Acc:MGI:1915115]
B cells	Il16	5.21e-13	0.0680613	0.556	0.526	8.42e-09	interleukin 16 [Source:MGI Symbol;Acc:MGI:1270855]
B cells	Fcf1	5.27e-13	0.111053	0.247	0.177	8.51e-09	FCF1 rRNA processing protein [Source:MGI Symbol;Acc:MGI:1920986]
B cells	Acat1	5.52e-13	0.0856067	0.284	0.242	8.92e-09	acetyl-Coenzyme A acetyltransferase 1 [Source:MGI Symbol;Acc:MGI:87870]
B cells	Ikzf3	5.64e-13	0.0338043	0.776	0.77	9.12e-09	IKAROS family zinc finger 3 [Source:MGI Symbol;Acc:MGI:1342542]
B cells	Ddx18	5.69e-13	0.0588334	0.457	0.426	9.19e-09	DEAD box helicase 18 [Source:MGI Symbol;Acc:MGI:1914192]
B cells	Tnrc6a	5.71e-13	0.0500421	0.601	0.575	9.23e-09	trinucleotide repeat containing 6a [Source:MGI Symbol;Acc:MGI:2385292]
B cells	Lrmp	5.85e-13	0.0613461	0.513	0.515	9.45e-09	lymphoid-restricted membrane protein [Source:MGI Symbol;Acc:MGI:108424]
B cells	Srsf9	6.24e-13	0.0614625	0.491	0.485	1.01e-08	serine and arginine-rich splicing factor 9 [Source:MGI Symbol;Acc:MGI:104896]
B cells	Mrpl48	6.34e-13	0.0898189	0.269	0.22	1.02e-08	mitochondrial ribosomal protein L48 [Source:MGI Symbol;Acc:MGI:1289321]
B cells	Cabin1	6.35e-13	0.0761689	0.288	0.243	1.03e-08	calcineurin binding protein 1 [Source:MGI Symbol;Acc:MGI:1298375]
B cells	Mrpl32	6.66e-13	0.0779686	0.307	0.257	1.08e-08	mitochondrial ribosomal protein L32 [Source:MGI Symbol;Acc:MGI:2137226]
B cells	Tfam	6.91e-13	0.0686137	0.356	0.324	1.12e-08	transcription factor A, mitochondrial [Source:MGI Symbol;Acc:MGI:107810]
B cells	Acadl	7.25e-13	0.0900946	0.286	0.25	1.17e-08	acyl-Coenzyme A dehydrogenase, long-chain [Source:MGI Symbol;Acc:MGI:87866]
B cells	Snrnp40	7.5e-13	0.0830366	0.298	0.253	1.21e-08	small nuclear ribonucleoprotein 40 (U5) [Source:MGI Symbol;Acc:MGI:1913835]
B cells	Sdhd	7.55e-13	0.083598	0.306	0.254	1.22e-08	succinate dehydrogenase complex, subunit D, integral membrane protein [Source:MGI Symbol;Acc:MGI:1914175]
B cells	Lncpint	7.77e-13	0.119268	0.248	0.17	1.26e-08	long non-protein coding RNA, Trp53 induced transcript [Source:MGI Symbol;Acc:MGI:2673128]
B cells	Rab8a	7.81e-13	0.066008	0.397	0.367	1.26e-08	RAB8A, member RAS oncogene family [Source:MGI Symbol;Acc:MGI:96960]
B cells	Cuta	7.88e-13	0.0649009	0.378	0.342	1.27e-08	cutA divalent cation tolerance homolog [Source:MGI Symbol;Acc:MGI:1914925]
B cells	Dync1i2	8.21e-13	0.0628483	0.46	0.442	1.33e-08	dynein cytoplasmic 1 intermediate chain 2 [Source:MGI Symbol;Acc:MGI:107750]
B cells	Sod1	8.28e-13	-0.256111	0.484	0.618	1.34e-08	superoxide dismutase 1, soluble [Source:MGI Symbol;Acc:MGI:98351]
B cells	Casp8	8.44e-13	0.0667348	0.37	0.318	1.36e-08	caspase 8 [Source:MGI Symbol;Acc:MGI:1261423]
B cells	Nub1	8.65e-13	0.0654876	0.354	0.327	1.4e-08	negative regulator of ubiquitin-like proteins 1 [Source:MGI Symbol;Acc:MGI:1889001]
B cells	Ate1	8.74e-13	0.118562	0.246	0.174	1.41e-08	arginyltransferase 1 [Source:MGI Symbol;Acc:MGI:1333870]
B cells	Klhl24	8.88e-13	0.034097	0.649	0.629	1.44e-08	kelch-like 24 [Source:MGI Symbol;Acc:MGI:1923035]
B cells	Nars	9.03e-13	0.0735399	0.374	0.34	1.46e-08	asparaginyl-tRNA synthetase [Source:MGI Symbol;Acc:MGI:1917473]
B cells	Alyref	9.03e-13	0.0723355	0.321	0.289	1.46e-08	Aly/REF export factor [Source:MGI Symbol;Acc:MGI:1341044]
B cells	Chd1	9.12e-13	0.0611094	0.439	0.411	1.47e-08	chromodomain helicase DNA binding protein 1 [Source:MGI Symbol;Acc:MGI:88393]
B cells	Arhgdia	9.14e-13	0.0310935	0.712	0.731	1.48e-08	Rho GDP dissociation inhibitor (GDI) alpha [Source:MGI Symbol;Acc:MGI:2178103]
B cells	Cops5	9.69e-13	0.0841507	0.29	0.237	1.57e-08	COP9 signalosome subunit 5 [Source:MGI Symbol;Acc:MGI:1349415]
B cells	Dpy30	9.71e-13	0.0930183	0.265	0.22	1.57e-08	dpy-30, histone methyltransferase complex regulatory subunit [Source:MGI Symbol;Acc:MGI:1913560]
B cells	Luc7l3	9.82e-13	0.0298118	0.748	0.737	1.59e-08	LUC7-like 3 (S. cerevisiae) [Source:MGI Symbol;Acc:MGI:1914934]
B cells	Rpf1	1.02e-12	0.0882283	0.277	0.23	1.64e-08	ribosome production factor 1 homolog [Source:MGI Symbol;Acc:MGI:1917535]
B cells	Tcea1	1.02e-12	0.0604857	0.53	0.51	1.64e-08	transcription elongation factor A (SII) 1 [Source:MGI Symbol;Acc:MGI:1196624]
B cells	Mtch1	1.03e-12	0.0619168	0.348	0.318	1.67e-08	mitochondrial carrier 1 [Source:MGI Symbol;Acc:MGI:1929261]
B cells	Psmd6	1.04e-12	0.0759629	0.344	0.306	1.68e-08	proteasome (prosome, macropain) 26S subunit, non-ATPase, 6 [Source:MGI Symbol;Acc:MGI:1913663]
B cells	Prpf40a	1.16e-12	0.0650109	0.547	0.533	1.87e-08	pre-mRNA processing factor 40A [Source:MGI Symbol;Acc:MGI:1860512]
B cells	Xpa	1.17e-12	0.109602	0.248	0.183	1.89e-08	xeroderma pigmentosum, complementation group A [Source:MGI Symbol;Acc:MGI:99135]
B cells	Sptbn1	1.17e-12	0.0736747	0.62	0.606	1.89e-08	spectrin beta, non-erythrocytic 1 [Source:MGI Symbol;Acc:MGI:98388]
B cells	Fam32a	1.19e-12	0.0652357	0.373	0.341	1.93e-08	family with sequence similarity 32, member A [Source:MGI Symbol;Acc:MGI:1915172]
B cells	Cnih4	1.22e-12	0.10028	0.253	0.194	1.97e-08	cornichon family AMPA receptor auxiliary protein 4 [Source:MGI Symbol;Acc:MGI:1925828]
B cells	Top1	1.22e-12	0.00148899	0.657	0.67	1.97e-08	topoisomerase (DNA) I [Source:MGI Symbol;Acc:MGI:98788]
B cells	Rbm22	1.24e-12	0.0682285	0.342	0.318	2e-08	RNA binding motif protein 22 [Source:MGI Symbol;Acc:MGI:1914060]
B cells	Polr2i	1.25e-12	0.0991667	0.248	0.194	2.02e-08	polymerase (RNA) II (DNA directed) polypeptide I [Source:MGI Symbol;Acc:MGI:1917170]
B cells	Cd84	1.27e-12	0.0522607	0.541	0.529	2.05e-08	CD84 antigen [Source:MGI Symbol;Acc:MGI:1336885]
B cells	Ino80	1.28e-12	0.104021	0.248	0.189	2.07e-08	INO80 complex subunit [Source:MGI Symbol;Acc:MGI:1915392]
B cells	Ccnd3	1.3e-12	0.0658626	0.354	0.326	2.1e-08	cyclin D3 [Source:MGI Symbol;Acc:MGI:88315]
B cells	Arl1	1.43e-12	0.0919332	0.264	0.209	2.3e-08	ADP-ribosylation factor-like 1 [Source:MGI Symbol;Acc:MGI:99436]
B cells	Nrm	1.45e-12	0.112735	0.246	0.181	2.35e-08	nurim (nuclear envelope membrane protein) [Source:MGI Symbol;Acc:MGI:2146855]
B cells	Rab5a	1.52e-12	0.0647422	0.344	0.308	2.45e-08	RAB5A, member RAS oncogene family [Source:MGI Symbol;Acc:MGI:105926]
B cells	Zfp644	1.52e-12	0.0589566	0.574	0.542	2.46e-08	zinc finger protein 644 [Source:MGI Symbol;Acc:MGI:1277212]
B cells	Stag1	1.53e-12	0.0575817	0.42	0.399	2.46e-08	stromal antigen 1 [Source:MGI Symbol;Acc:MGI:1098658]
B cells	Ap1m1	1.57e-12	0.0805352	0.286	0.236	2.53e-08	adaptor-related protein complex AP-1, mu subunit 1 [Source:MGI Symbol;Acc:MGI:102776]
B cells	Rsrc2	1.6e-12	0.0320826	0.695	0.706	2.59e-08	arginine/serine-rich coiled-coil 2 [Source:MGI Symbol;Acc:MGI:1913489]
B cells	Cbx3	1.62e-12	0.0459648	0.604	0.61	2.61e-08	chromobox 3 [Source:MGI Symbol;Acc:MGI:108515]
B cells	Bag1	1.66e-12	0.0581915	0.389	0.368	2.69e-08	BCL2-associated athanogene 1 [Source:MGI Symbol;Acc:MGI:108047]
B cells	Herc2	1.75e-12	0.064851	0.373	0.348	2.82e-08	HECT and RLD domain containing E3 ubiquitin protein ligase 2 [Source:MGI Symbol;Acc:MGI:103234]
B cells	2210016L21Rik	1.9e-12	0.0759081	0.292	0.247	3.07e-08	RIKEN cDNA 2210016L21 gene [Source:MGI Symbol;Acc:MGI:1919607]
B cells	Rexo2	1.9e-12	0.0719679	0.423	0.391	3.07e-08	RNA exonuclease 2 [Source:MGI Symbol;Acc:MGI:1888981]
B cells	Erlec1	1.98e-12	0.115201	0.238	0.167	3.21e-08	endoplasmic reticulum lectin 1 [Source:MGI Symbol;Acc:MGI:1914003]
B cells	Rlf	2.03e-12	0.0618705	0.372	0.33	3.29e-08	rearranged L-myc fusion sequence [Source:MGI Symbol;Acc:MGI:1924705]
B cells	Tap1	2.06e-12	0.0251445	0.694	0.68	3.33e-08	transporter 1, ATP-binding cassette, sub-family B (MDR/TAP) [Source:MGI Symbol;Acc:MGI:98483]
B cells	Pon2	2.07e-12	0.086244	0.268	0.221	3.34e-08	paraoxonase 2 [Source:MGI Symbol;Acc:MGI:106687]
B cells	Wbp11	2.08e-12	0.0601054	0.43	0.4	3.36e-08	WW domain binding protein 11 [Source:MGI Symbol;Acc:MGI:1891823]
B cells	Sirt7	2.09e-12	0.0588247	0.41	0.38	3.38e-08	sirtuin 7 [Source:MGI Symbol;Acc:MGI:2385849]
B cells	Lsm6	2.14e-12	0.0606959	0.535	0.53	3.46e-08	LSM6 homolog, U6 small nuclear RNA and mRNA degradation associated [Source:MGI Symbol;Acc:MGI:1925901]
B cells	Rnf10	2.15e-12	0.0676541	0.366	0.328	3.47e-08	ring finger protein 10 [Source:MGI Symbol;Acc:MGI:1859162]
B cells	Polr2c	2.16e-12	0.0812142	0.268	0.22	3.5e-08	polymerase (RNA) II (DNA directed) polypeptide C [Source:MGI Symbol;Acc:MGI:109299]
B cells	Ssb	2.17e-12	0.0555162	0.649	0.639	3.5e-08	Sjogren syndrome antigen B [Source:MGI Symbol;Acc:MGI:98423]
B cells	Tmem173	2.17e-12	0.070465	0.321	0.283	3.51e-08	NA
B cells	Pnp	2.26e-12	0.106697	0.247	0.18	3.65e-08	purine-nucleoside phosphorylase [Source:MGI Symbol;Acc:MGI:97365]
B cells	Hivep1	2.33e-12	0.0917886	0.287	0.246	3.77e-08	human immunodeficiency virus type I enhancer binding protein 1 [Source:MGI Symbol;Acc:MGI:96100]
B cells	Dtnbp1	2.34e-12	0.125547	0.229	0.157	3.79e-08	dystrobrevin binding protein 1 [Source:MGI Symbol;Acc:MGI:2137586]
B cells	Fam214a	2.49e-12	0.0759268	0.296	0.264	4.03e-08	family with sequence similarity 214, member A [Source:MGI Symbol;Acc:MGI:2387648]
B cells	Snrnp200	2.64e-12	0.0687683	0.403	0.368	4.27e-08	small nuclear ribonucleoprotein 200 (U5) [Source:MGI Symbol;Acc:MGI:2444401]
B cells	Ifngr1	2.7e-12	0.0699894	0.343	0.302	4.36e-08	interferon gamma receptor 1 [Source:MGI Symbol;Acc:MGI:107655]
B cells	Ccdc174	2.79e-12	0.0782416	0.291	0.246	4.51e-08	coiled-coil domain containing 174 [Source:MGI Symbol;Acc:MGI:2444652]
B cells	Eci1	2.8e-12	0.122132	0.241	0.164	4.53e-08	enoyl-Coenzyme A delta isomerase 1 [Source:MGI Symbol;Acc:MGI:94871]
B cells	Slc1a5	2.83e-12	0.0693192	0.375	0.343	4.57e-08	solute carrier family 1 (neutral amino acid transporter), member 5 [Source:MGI Symbol;Acc:MGI:105305]
B cells	Mrpl51	3.03e-12	0.0634648	0.378	0.348	4.89e-08	mitochondrial ribosomal protein L51 [Source:MGI Symbol;Acc:MGI:1913743]
B cells	H2-T22	3.13e-12	0.0394835	0.512	0.519	5.06e-08	histocompatibility 2, T region locus 22 [Source:MGI Symbol;Acc:MGI:95956]
B cells	Ppt1	3.27e-12	0.0683206	0.326	0.277	5.28e-08	palmitoyl-protein thioesterase 1 [Source:MGI Symbol;Acc:MGI:1298204]
B cells	Mphosph8	3.48e-12	0.0623635	0.378	0.358	5.62e-08	M-phase phosphoprotein 8 [Source:MGI Symbol;Acc:MGI:1922589]
B cells	Wdr33	3.53e-12	0.0532156	0.507	0.473	5.7e-08	WD repeat domain 33 [Source:MGI Symbol;Acc:MGI:1921570]
B cells	Twistnb	3.64e-12	0.0703148	0.364	0.336	5.88e-08	NA
B cells	Fnbp1	3.71e-12	0.0379408	0.656	0.663	6e-08	formin binding protein 1 [Source:MGI Symbol;Acc:MGI:109606]
B cells	Rapgef6	3.79e-12	0.0678112	0.608	0.59	6.13e-08	Rap guanine nucleotide exchange factor (GEF) 6 [Source:MGI Symbol;Acc:MGI:2384761]
B cells	Thumpd3	3.84e-12	0.0668788	0.317	0.282	6.21e-08	THUMP domain containing 3 [Source:MGI Symbol;Acc:MGI:1277973]
B cells	Nrbp1	3.92e-12	0.058723	0.346	0.321	6.34e-08	nuclear receptor binding protein 1 [Source:MGI Symbol;Acc:MGI:2183436]
B cells	Rad50	3.96e-12	0.0683874	0.315	0.295	6.4e-08	RAD50 double strand break repair protein [Source:MGI Symbol;Acc:MGI:109292]
B cells	Mvb12a	3.97e-12	0.0762555	0.283	0.241	6.41e-08	multivesicular body subunit 12A [Source:MGI Symbol;Acc:MGI:1920961]
B cells	Eed	4.16e-12	0.0716639	0.287	0.255	6.72e-08	embryonic ectoderm development [Source:MGI Symbol;Acc:MGI:95286]
B cells	Lyz2	4.19e-12	0.0672789	0.35	0.328	6.76e-08	lysozyme 2 [Source:MGI Symbol;Acc:MGI:96897]
B cells	Fh1	4.25e-12	0.104184	0.247	0.191	6.87e-08	fumarate hydratase 1 [Source:MGI Symbol;Acc:MGI:95530]
B cells	Dennd4a	4.31e-12	0.0698589	0.4	0.375	6.97e-08	DENN/MADD domain containing 4A [Source:MGI Symbol;Acc:MGI:2142979]
B cells	Dnttip2	4.39e-12	0.0684454	0.338	0.308	7.09e-08	deoxynucleotidyltransferase, terminal, interacting protein 2 [Source:MGI Symbol;Acc:MGI:1923173]
B cells	Plec	4.44e-12	0.077449	0.304	0.279	7.18e-08	plectin [Source:MGI Symbol;Acc:MGI:1277961]
B cells	Hmg20b	4.57e-12	0.0654406	0.307	0.271	7.39e-08	high mobility group 20B [Source:MGI Symbol;Acc:MGI:1341190]
B cells	Grk6	4.58e-12	0.0460309	0.561	0.563	7.4e-08	G protein-coupled receptor kinase 6 [Source:MGI Symbol;Acc:MGI:1347078]
B cells	Neurl3	4.82e-12	0.105114	0.229	0.181	7.79e-08	neuralized E3 ubiquitin protein ligase 3 [Source:MGI Symbol;Acc:MGI:2429944]
B cells	Arid4a	4.89e-12	0.0467325	0.478	0.476	7.9e-08	AT rich interactive domain 4A (RBP1-like) [Source:MGI Symbol;Acc:MGI:2444354]
B cells	Ublcp1	5.01e-12	0.0629899	0.333	0.307	8.09e-08	ubiquitin-like domain containing CTD phosphatase 1 [Source:MGI Symbol;Acc:MGI:1933105]
B cells	Mrto4	5.11e-12	0.103526	0.256	0.198	8.25e-08	mRNA turnover 4, ribosome maturation factor [Source:MGI Symbol;Acc:MGI:1917152]
B cells	Pld4	5.11e-12	-0.00171707	0.628	0.64	8.26e-08	phospholipase D family, member 4 [Source:MGI Symbol;Acc:MGI:2144765]
B cells	A530032D15Rik	5.18e-12	0.0741689	0.28	0.257	8.37e-08	RIKEN cDNA A530032D15Rik gene [Source:MGI Symbol;Acc:MGI:3037746]
B cells	Rel	5.33e-12	0.0461603	0.686	0.667	8.62e-08	reticuloendotheliosis oncogene [Source:MGI Symbol;Acc:MGI:97897]
B cells	Pbdc1	5.34e-12	0.0867583	0.264	0.216	8.62e-08	polysaccharide biosynthesis domain containing 1 [Source:MGI Symbol;Acc:MGI:1914933]
B cells	Mtch2	5.36e-12	0.0556567	0.328	0.294	8.67e-08	mitochondrial carrier 2 [Source:MGI Symbol;Acc:MGI:1929260]
B cells	Lgals8	5.56e-12	0.0572123	0.335	0.311	8.98e-08	lectin, galactose binding, soluble 8 [Source:MGI Symbol;Acc:MGI:1928481]
B cells	Hmgn3	5.69e-12	0.0985512	0.243	0.209	9.2e-08	high mobility group nucleosomal binding domain 3 [Source:MGI Symbol;Acc:MGI:2138069]
B cells	Ddx54	5.88e-12	0.0499348	0.563	0.559	9.5e-08	DEAD box helicase 54 [Source:MGI Symbol;Acc:MGI:1919240]
B cells	Yy1	5.97e-12	0.0485661	0.577	0.564	9.64e-08	YY1 transcription factor [Source:MGI Symbol;Acc:MGI:99150]
B cells	Fam174a	6.23e-12	0.0726084	0.28	0.232	1.01e-07	family with sequence similarity 174, member A [Source:MGI Symbol;Acc:MGI:1914948]
B cells	Usp34	6.68e-12	0.0552302	0.662	0.645	1.08e-07	ubiquitin specific peptidase 34 [Source:MGI Symbol;Acc:MGI:109473]
B cells	Laptm4a	6.77e-12	0.0549815	0.423	0.387	1.09e-07	lysosomal-associated protein transmembrane 4A [Source:MGI Symbol;Acc:MGI:108017]
B cells	Cir1	6.91e-12	0.0790964	0.269	0.225	1.12e-07	corepressor interacting with RBPJ, 1 [Source:MGI Symbol;Acc:MGI:1914185]
B cells	Mbd3	7.17e-12	0.0525514	0.394	0.371	1.16e-07	methyl-CpG binding domain protein 3 [Source:MGI Symbol;Acc:MGI:1333812]
B cells	Dtymk	7.42e-12	0.0796303	0.276	0.241	1.2e-07	deoxythymidylate kinase [Source:MGI Symbol;Acc:MGI:108396]
B cells	Add3	7.45e-12	0.0488806	0.608	0.603	1.2e-07	adducin 3 (gamma) [Source:MGI Symbol;Acc:MGI:1351615]
B cells	Parp1	7.76e-12	0.071671	0.54	0.524	1.25e-07	poly (ADP-ribose) polymerase family, member 1 [Source:MGI Symbol;Acc:MGI:1340806]
B cells	Hist1h1e	7.78e-12	0.127319	0.223	0.159	1.26e-07	NA
B cells	Pcbd2	7.92e-12	0.11921	0.227	0.164	1.28e-07	pterin 4 alpha carbinolamine dehydratase/dimerization cofactor of hepatocyte nuclear factor 1 alpha (TCF1) 2 [Source:MGI Symbol;Acc:MGI:1919812]
B cells	Pold1	8.08e-12	0.117081	0.234	0.176	1.31e-07	polymerase (DNA directed), delta 1, catalytic subunit [Source:MGI Symbol;Acc:MGI:97741]
B cells	Bin2	8.09e-12	0.0654107	0.359	0.336	1.31e-07	bridging integrator 2 [Source:MGI Symbol;Acc:MGI:3611448]
B cells	Ebp	8.12e-12	0.103413	0.245	0.182	1.31e-07	phenylalkylamine Ca2+ antagonist (emopamil) binding protein [Source:MGI Symbol;Acc:MGI:107822]
B cells	Mydgf	8.16e-12	0.0852524	0.278	0.235	1.32e-07	myeloid derived growth factor [Source:MGI Symbol;Acc:MGI:2156020]
B cells	Snw1	8.16e-12	0.0490801	0.492	0.485	1.32e-07	SNW domain containing 1 [Source:MGI Symbol;Acc:MGI:1913604]
B cells	Tsn	8.34e-12	0.0680252	0.513	0.486	1.35e-07	translin [Source:MGI Symbol;Acc:MGI:109263]
B cells	Itpr2	8.36e-12	0.0506432	0.622	0.595	1.35e-07	inositol 1,4,5-triphosphate receptor 2 [Source:MGI Symbol;Acc:MGI:99418]
B cells	Slc3a2	8.36e-12	0.0658069	0.34	0.303	1.35e-07	solute carrier family 3 (activators of dibasic and neutral amino acid transport), member 2 [Source:MGI Symbol;Acc:MGI:96955]
B cells	Fchsd2	8.49e-12	0.0104075	0.655	0.674	1.37e-07	FCH and double SH3 domains 2 [Source:MGI Symbol;Acc:MGI:2448475]
B cells	Epc1	8.58e-12	0.0522104	0.348	0.317	1.39e-07	enhancer of polycomb homolog 1 [Source:MGI Symbol;Acc:MGI:1278322]
B cells	Aldh7a1	9.1e-12	0.0819022	0.269	0.225	1.47e-07	aldehyde dehydrogenase family 7, member A1 [Source:MGI Symbol;Acc:MGI:108186]
B cells	Flna	9.23e-12	0.0670909	0.485	0.456	1.49e-07	filamin, alpha [Source:MGI Symbol;Acc:MGI:95556]
B cells	Usp3	9.23e-12	0.0638754	0.322	0.282	1.49e-07	ubiquitin specific peptidase 3 [Source:MGI Symbol;Acc:MGI:2152450]
B cells	Adprh	9.25e-12	0.0928409	0.256	0.199	1.49e-07	ADP-ribosylarginine hydrolase [Source:MGI Symbol;Acc:MGI:1098234]
B cells	Mrpl58	9.3e-12	0.136108	0.223	0.152	1.5e-07	mitochondrial ribosomal protein L58 [Source:MGI Symbol;Acc:MGI:1915822]
B cells	Stt3b	9.42e-12	0.0763003	0.548	0.528	1.52e-07	STT3, subunit of the oligosaccharyltransferase complex, homolog B (S. cerevisiae) [Source:MGI Symbol;Acc:MGI:1915542]
B cells	Rp9	9.77e-12	0.040834	0.618	0.603	1.58e-07	retinitis pigmentosa 9 (human) [Source:MGI Symbol;Acc:MGI:2157166]
B cells	Supt16	1.02e-11	0.0556484	0.51	0.502	1.64e-07	SPT16, facilitates chromatin remodeling subunit [Source:MGI Symbol;Acc:MGI:1890948]
B cells	Dock2	1.03e-11	-0.00163222	0.821	0.835	1.67e-07	dedicator of cyto-kinesis 2 [Source:MGI Symbol;Acc:MGI:2149010]
B cells	Hexb	1.07e-11	0.0640588	0.333	0.296	1.73e-07	hexosaminidase B [Source:MGI Symbol;Acc:MGI:96074]
B cells	2022-03-05	1.09e-11	0.102667	0.242	0.18	1.76e-07	NA
B cells	Tprgl	1.16e-11	0.0488512	0.36	0.332	1.88e-07	transformation related protein 63 regulated like [Source:MGI Symbol;Acc:MGI:1915058]
B cells	Ddx1	1.16e-11	0.0990238	0.24	0.193	1.88e-07	DEAD box helicase 1 [Source:MGI Symbol;Acc:MGI:2144727]
B cells	Tlk1	1.2e-11	0.050786	0.382	0.363	1.93e-07	tousled-like kinase 1 [Source:MGI Symbol;Acc:MGI:2441683]
B cells	Cmtr1	1.2e-11	0.0506811	0.355	0.323	1.93e-07	cap methyltransferase 1 [Source:MGI Symbol;Acc:MGI:1921407]
B cells	Commd2	1.24e-11	0.0931883	0.248	0.184	2.01e-07	COMM domain containing 2 [Source:MGI Symbol;Acc:MGI:1098806]
B cells	Ifi206	1.25e-11	0.129727	0.22	0.166	2.01e-07	interferon activated gene 206 [Source:MGI Symbol;Acc:MGI:3646410]
B cells	Cct8	1.27e-11	0.0492061	0.524	0.517	2.05e-07	chaperonin containing Tcp1, subunit 8 (theta) [Source:MGI Symbol;Acc:MGI:107183]
B cells	Smchd1	1.32e-11	0.0296686	0.669	0.659	2.14e-07	SMC hinge domain containing 1 [Source:MGI Symbol;Acc:MGI:1921605]
B cells	Xrn1	1.33e-11	0.054187	0.399	0.377	2.15e-07	5'-3' exoribonuclease 1 [Source:MGI Symbol;Acc:MGI:891964]
B cells	Cul1	1.34e-11	0.071058	0.35	0.32	2.16e-07	cullin 1 [Source:MGI Symbol;Acc:MGI:1349658]
B cells	Ap2m1	1.56e-11	0.0551401	0.385	0.353	2.52e-07	adaptor-related protein complex 2, mu 1 subunit [Source:MGI Symbol;Acc:MGI:1298405]
B cells	1110038F14Rik	1.6e-11	0.066635	0.285	0.245	2.58e-07	RIKEN cDNA 1110038F14 gene [Source:MGI Symbol;Acc:MGI:2152337]
B cells	Mrps12	1.62e-11	0.073534	0.275	0.231	2.61e-07	mitochondrial ribosomal protein S12 [Source:MGI Symbol;Acc:MGI:1346333]
B cells	Hpf1	1.64e-11	0.0552466	0.326	0.305	2.64e-07	histone PARylation factor 1 [Source:MGI Symbol;Acc:MGI:1919862]
B cells	Emc2	1.64e-11	0.0922108	0.245	0.191	2.65e-07	ER membrane protein complex subunit 2 [Source:MGI Symbol;Acc:MGI:1913986]
B cells	Dpm2	1.67e-11	0.106056	0.239	0.165	2.69e-07	dolichol-phosphate (beta-D) mannosyltransferase 2 [Source:MGI Symbol;Acc:MGI:1330238]
B cells	Hp1bp3	1.69e-11	0.0557302	0.476	0.469	2.74e-07	heterochromatin protein 1, binding protein 3 [Source:MGI Symbol;Acc:MGI:109369]
B cells	Rbbp6	1.72e-11	0.0348306	0.71	0.711	2.77e-07	retinoblastoma binding protein 6, ubiquitin ligase [Source:MGI Symbol;Acc:MGI:894835]
B cells	Hscb	1.77e-11	0.101748	0.238	0.186	2.86e-07	HscB iron-sulfur cluster co-chaperone [Source:MGI Symbol;Acc:MGI:2141135]
B cells	Bin1	1.79e-11	0.0229584	0.626	0.653	2.89e-07	bridging integrator 1 [Source:MGI Symbol;Acc:MGI:108092]
B cells	Cybc1	1.8e-11	-0.24519	0.399	0.544	2.9e-07	cytochrome b 245 chaperone 1 [Source:MGI Symbol;Acc:MGI:2384959]
B cells	Gatad2a	1.81e-11	0.0637485	0.308	0.285	2.93e-07	GATA zinc finger domain containing 2A [Source:MGI Symbol;Acc:MGI:2384585]
B cells	Idh3b	1.83e-11	0.0559285	0.368	0.336	2.96e-07	isocitrate dehydrogenase 3 (NAD+) beta [Source:MGI Symbol;Acc:MGI:2158650]
B cells	Fos	1.88e-11	0.268598	0.171	0.065	3.04e-07	FBJ osteosarcoma oncogene [Source:MGI Symbol;Acc:MGI:95574]
B cells	Dnajc10	1.88e-11	0.0895612	0.244	0.202	3.04e-07	DnaJ heat shock protein family (Hsp40) member C10 [Source:MGI Symbol;Acc:MGI:1914111]
B cells	Psmd11	2.12e-11	0.0524085	0.463	0.453	3.42e-07	proteasome (prosome, macropain) 26S subunit, non-ATPase, 11 [Source:MGI Symbol;Acc:MGI:1916327]
B cells	Fdx2	2.16e-11	0.0853265	0.274	0.229	3.49e-07	ferredoxin 2 [Source:MGI Symbol;Acc:MGI:1915415]
B cells	Gon4l	2.17e-11	0.0590271	0.315	0.287	3.5e-07	gon-4-like (C.elegans) [Source:MGI Symbol;Acc:MGI:1917579]
B cells	Ghitm	2.17e-11	0.066079	0.434	0.412	3.51e-07	growth hormone inducible transmembrane protein [Source:MGI Symbol;Acc:MGI:1913342]
B cells	Yipf4	2.2e-11	0.0681692	0.269	0.227	3.55e-07	Yip1 domain family, member 4 [Source:MGI Symbol;Acc:MGI:1915114]
B cells	Pafah1b1	2.27e-11	0.0360472	0.697	0.685	3.67e-07	platelet-activating factor acetylhydrolase, isoform 1b, subunit 1 [Source:MGI Symbol;Acc:MGI:109520]
B cells	Uqcrc2	2.27e-11	0.0542818	0.429	0.405	3.67e-07	ubiquinol cytochrome c reductase core protein 2 [Source:MGI Symbol;Acc:MGI:1914253]
B cells	Ufl1	2.28e-11	0.0651522	0.298	0.271	3.68e-07	UFM1 specific ligase 1 [Source:MGI Symbol;Acc:MGI:1914740]
B cells	Gpatch4	2.3e-11	0.0859113	0.25	0.22	3.71e-07	G patch domain containing 4 [Source:MGI Symbol;Acc:MGI:1913864]
B cells	Larp7	2.31e-11	0.0886163	0.256	0.214	3.74e-07	La ribonucleoprotein domain family, member 7 [Source:MGI Symbol;Acc:MGI:107634]
B cells	Samm50	2.39e-11	0.0642295	0.32	0.283	3.87e-07	SAMM50 sorting and assembly machinery component [Source:MGI Symbol;Acc:MGI:1915903]
B cells	Apex1	2.41e-11	0.110173	0.222	0.187	3.9e-07	apurinic/apyrimidinic endonuclease 1 [Source:MGI Symbol;Acc:MGI:88042]
B cells	Atf6	2.5e-11	0.0581479	0.418	0.401	4.04e-07	activating transcription factor 6 [Source:MGI Symbol;Acc:MGI:1926157]
B cells	Hist1h2ap	2.5e-11	0.0911451	0.233	0.201	4.04e-07	NA
B cells	Trp53i11	2.53e-11	0.0701118	0.293	0.262	4.08e-07	transformation related protein 53 inducible protein 11 [Source:MGI Symbol;Acc:MGI:2670995]
B cells	Exosc3	2.53e-11	0.0632531	0.3	0.263	4.09e-07	exosome component 3 [Source:MGI Symbol;Acc:MGI:1913612]
B cells	Parl	2.54e-11	0.110416	0.239	0.165	4.1e-07	presenilin associated, rhomboid-like [Source:MGI Symbol;Acc:MGI:1277152]
B cells	Ndufa10	2.63e-11	0.0649905	0.385	0.362	4.24e-07	NADH:ubiquinone oxidoreductase subunit A10 [Source:MGI Symbol;Acc:MGI:1914523]
B cells	1500011B03Rik	2.67e-11	0.116082	0.223	0.162	4.32e-07	RIKEN cDNA 1500011B03 gene [Source:MGI Symbol;Acc:MGI:1913486]
B cells	Slc38a9	2.78e-11	0.0597828	0.384	0.372	4.49e-07	solute carrier family 38, member 9 [Source:MGI Symbol;Acc:MGI:1918839]
B cells	Hist1h1c	2.81e-11	0.123198	0.227	0.148	4.53e-07	NA
B cells	Itpr1	2.81e-11	0.0528219	0.636	0.608	4.53e-07	inositol 1,4,5-trisphosphate receptor 1 [Source:MGI Symbol;Acc:MGI:96623]
B cells	Ubn1	2.82e-11	0.0538038	0.366	0.339	4.56e-07	ubinuclein 1 [Source:MGI Symbol;Acc:MGI:1891307]
B cells	Serinc3	3.08e-11	-0.120896	0.947	0.96	4.97e-07	serine incorporator 3 [Source:MGI Symbol;Acc:MGI:1349457]
B cells	Bhlhe41	3.09e-11	0.0670111	0.34	0.323	4.99e-07	basic helix-loop-helix family, member e41 [Source:MGI Symbol;Acc:MGI:1930704]
B cells	Cep295	3.11e-11	0.0762402	0.266	0.219	5.03e-07	centrosomal protein 295 [Source:MGI Symbol;Acc:MGI:2442521]
B cells	Hsd17b10	3.13e-11	0.100586	0.229	0.177	5.05e-07	hydroxysteroid (17-beta) dehydrogenase 10 [Source:MGI Symbol;Acc:MGI:1333871]
B cells	Trim35	3.29e-11	0.048672	0.537	0.52	5.32e-07	tripartite motif-containing 35 [Source:MGI Symbol;Acc:MGI:1914104]
B cells	Supt6	3.35e-11	0.0584974	0.348	0.321	5.41e-07	SPT6, histone chaperone and transcription elongation factor [Source:MGI Symbol;Acc:MGI:107726]
B cells	Brix1	3.36e-11	0.0817229	0.26	0.214	5.43e-07	BRX1, biogenesis of ribosomes [Source:MGI Symbol;Acc:MGI:1915082]
B cells	Emg1	3.36e-11	0.0537981	0.498	0.479	5.43e-07	EMG1 N1-specific pseudouridine methyltransferase [Source:MGI Symbol;Acc:MGI:1315195]
B cells	Srrt	3.51e-11	0.043282	0.488	0.451	5.67e-07	serrate RNA effector molecule homolog (Arabidopsis) [Source:MGI Symbol;Acc:MGI:1933527]
B cells	Prr13	3.56e-11	0.0379932	0.554	0.547	5.76e-07	proline rich 13 [Source:MGI Symbol;Acc:MGI:1913401]
B cells	Thoc7	3.66e-11	0.045343	0.36	0.34	5.91e-07	THO complex 7 [Source:MGI Symbol;Acc:MGI:1913481]
B cells	Emd	3.75e-11	0.0576822	0.31	0.276	6.05e-07	emerin [Source:MGI Symbol;Acc:MGI:108117]
B cells	4632427E13Rik	3.8e-11	0.0400683	0.454	0.442	6.14e-07	RIKEN cDNA 4632427E13 gene [Source:MGI Symbol;Acc:MGI:1915436]
B cells	Stx16	3.83e-11	0.0488948	0.396	0.366	6.19e-07	syntaxin 16 [Source:MGI Symbol;Acc:MGI:1923396]
B cells	Ncor1	3.84e-11	-0.000235709	0.727	0.74	6.21e-07	nuclear receptor co-repressor 1 [Source:MGI Symbol;Acc:MGI:1349717]
B cells	Acbd3	3.92e-11	0.0499299	0.329	0.301	6.33e-07	acyl-Coenzyme A binding domain containing 3 [Source:MGI Symbol;Acc:MGI:2181074]
B cells	Hibadh	3.95e-11	0.064713	0.287	0.252	6.38e-07	3-hydroxyisobutyrate dehydrogenase [Source:MGI Symbol;Acc:MGI:1889802]
B cells	Gmps	4.05e-11	0.0740031	0.282	0.233	6.55e-07	guanine monophosphate synthetase [Source:MGI Symbol;Acc:MGI:2448526]
B cells	Flii	4.22e-11	0.0538248	0.319	0.282	6.82e-07	flightless I actin binding protein [Source:MGI Symbol;Acc:MGI:1342286]
B cells	Arap2	4.3e-11	0.0518097	0.503	0.48	6.95e-07	ArfGAP with RhoGAP domain, ankyrin repeat and PH domain 2 [Source:MGI Symbol;Acc:MGI:2684416]
B cells	Kdm1a	4.36e-11	0.0489717	0.408	0.393	7.05e-07	lysine (K)-specific demethylase 1A [Source:MGI Symbol;Acc:MGI:1196256]
B cells	Lgmn	4.41e-11	0.0509995	0.452	0.438	7.13e-07	legumain [Source:MGI Symbol;Acc:MGI:1330838]
B cells	Smarce1	4.42e-11	0.055638	0.434	0.413	7.14e-07	SWI/SNF related, matrix associated, actin dependent regulator of chromatin, subfamily e, member 1 [Source:MGI Symbol;Acc:MGI:1927347]
B cells	Zc3h13	4.56e-11	0.0555722	0.467	0.454	7.36e-07	zinc finger CCCH type containing 13 [Source:MGI Symbol;Acc:MGI:1914552]
B cells	Neat1	4.62e-11	0.058919	0.506	0.493	7.46e-07	nuclear paraspeckle assembly transcript 1 (non-protein coding) [Source:MGI Symbol;Acc:MGI:1914211]
B cells	Erg28	4.69e-11	0.0658179	0.275	0.236	7.58e-07	ergosterol biosynthesis 28 [Source:MGI Symbol;Acc:MGI:1915571]
B cells	Pggt1b	4.82e-11	0.0598201	0.333	0.296	7.79e-07	protein geranylgeranyltransferase type I, beta subunit [Source:MGI Symbol;Acc:MGI:1917514]
B cells	Gtf3c6	4.98e-11	0.0798183	0.247	0.201	8.04e-07	general transcription factor IIIC, polypeptide 6, alpha [Source:MGI Symbol;Acc:MGI:1914621]
B cells	Guk1	5.02e-11	0.0601784	0.307	0.275	8.11e-07	guanylate kinase 1 [Source:MGI Symbol;Acc:MGI:95871]
B cells	Clpp	5.31e-11	0.0705513	0.26	0.226	8.58e-07	caseinolytic mitochondrial matrix peptidase proteolytic subunit [Source:MGI Symbol;Acc:MGI:1858213]
B cells	Exosc7	5.47e-11	0.10355	0.23	0.17	8.83e-07	exosome component 7 [Source:MGI Symbol;Acc:MGI:1913696]
B cells	Irf3	5.66e-11	0.0526397	0.398	0.374	9.14e-07	interferon regulatory factor 3 [Source:MGI Symbol;Acc:MGI:1859179]
B cells	Cep57	5.84e-11	0.0654423	0.305	0.27	9.43e-07	centrosomal protein 57 [Source:MGI Symbol;Acc:MGI:1915551]
B cells	Iars2	6.05e-11	0.0674974	0.27	0.23	9.78e-07	isoleucine-tRNA synthetase 2, mitochondrial [Source:MGI Symbol;Acc:MGI:1919586]
B cells	Atp11b	6.08e-11	0.0514951	0.413	0.377	9.82e-07	ATPase, class VI, type 11B [Source:MGI Symbol;Acc:MGI:1923545]
B cells	Phf3	6.26e-11	0.028784	0.594	0.567	1.01e-06	PHD finger protein 3 [Source:MGI Symbol;Acc:MGI:2446126]
B cells	Clns1a	6.36e-11	0.0707334	0.277	0.235	1.03e-06	chloride channel, nucleotide-sensitive, 1A [Source:MGI Symbol;Acc:MGI:109638]
B cells	Nfx1	6.48e-11	0.056121	0.36	0.318	1.05e-06	nuclear transcription factor, X-box binding 1 [Source:MGI Symbol;Acc:MGI:1921414]
B cells	Traf1	6.65e-11	0.0579371	0.378	0.371	1.07e-06	TNF receptor-associated factor 1 [Source:MGI Symbol;Acc:MGI:101836]
B cells	Rictor	6.68e-11	0.0554792	0.343	0.309	1.08e-06	RPTOR independent companion of MTOR, complex 2 [Source:MGI Symbol;Acc:MGI:1926007]
B cells	Skp1a	6.73e-11	0.0503089	0.328	0.301	1.09e-06	NA
B cells	Rbbp7	6.81e-11	0.0568029	0.421	0.403	1.1e-06	retinoblastoma binding protein 7, chromatin remodeling factor [Source:MGI Symbol;Acc:MGI:1194910]
B cells	Ormdl2	6.9e-11	0.110947	0.233	0.158	1.12e-06	ORM1-like 2 (S. cerevisiae) [Source:MGI Symbol;Acc:MGI:1914094]
B cells	Tex261	7.05e-11	0.0512913	0.343	0.316	1.14e-06	testis expressed gene 261 [Source:MGI Symbol;Acc:MGI:1096575]
B cells	Clint1	7.11e-11	0.059532	0.48	0.456	1.15e-06	clathrin interactor 1 [Source:MGI Symbol;Acc:MGI:2144243]
B cells	Mpp6	7.26e-11	0.0878599	0.238	0.19	1.17e-06	membrane protein, palmitoylated 6 (MAGUK p55 subfamily member 6) [Source:MGI Symbol;Acc:MGI:1927340]
B cells	Ifnar2	7.46e-11	0.0802116	0.264	0.206	1.21e-06	interferon (alpha and beta) receptor 2 [Source:MGI Symbol;Acc:MGI:1098243]
B cells	Litaf	7.48e-11	0.0855651	0.252	0.188	1.21e-06	LPS-induced TN factor [Source:MGI Symbol;Acc:MGI:1929512]
B cells	Capzb	7.53e-11	0.00681288	0.752	0.767	1.22e-06	capping protein (actin filament) muscle Z-line, beta [Source:MGI Symbol;Acc:MGI:104652]
B cells	Cct5	7.58e-11	0.0243737	0.579	0.592	1.22e-06	chaperonin containing Tcp1, subunit 5 (epsilon) [Source:MGI Symbol;Acc:MGI:107185]
B cells	Btla	8.12e-11	0.0595615	0.585	0.563	1.31e-06	B and T lymphocyte associated [Source:MGI Symbol;Acc:MGI:2658978]
B cells	Dcaf13	8.44e-11	0.0523656	0.297	0.262	1.36e-06	DDB1 and CUL4 associated factor 13 [Source:MGI Symbol;Acc:MGI:2684929]
B cells	Pam16	8.93e-11	0.0799808	0.251	0.204	1.44e-06	presequence translocase-asssociated motor 16 homolog (S. cerevisiae) [Source:MGI Symbol;Acc:MGI:1913699]
B cells	Gnl2	8.94e-11	0.0894463	0.238	0.183	1.44e-06	guanine nucleotide binding protein-like 2 (nucleolar) [Source:MGI Symbol;Acc:MGI:2385207]
B cells	Chd4	9.12e-11	-0.0203686	0.781	0.78	1.47e-06	chromodomain helicase DNA binding protein 4 [Source:MGI Symbol;Acc:MGI:1344380]
B cells	Lsm1	9.49e-11	0.0921713	0.236	0.179	1.53e-06	LSM1 homolog, mRNA degradation associated [Source:MGI Symbol;Acc:MGI:1914457]
B cells	Nop56	9.52e-11	0.0382936	0.5	0.496	1.54e-06	NOP56 ribonucleoprotein [Source:MGI Symbol;Acc:MGI:1914384]
B cells	Rab5if	9.53e-11	0.0542356	0.35	0.329	1.54e-06	RAB5 interacting factor [Source:MGI Symbol;Acc:MGI:1914638]
B cells	Alg5	9.61e-11	0.118171	0.214	0.145	1.55e-06	asparagine-linked glycosylation 5 (dolichyl-phosphate beta-glucosyltransferase) [Source:MGI Symbol;Acc:MGI:1913498]
B cells	Snx9	9.64e-11	0.0597914	0.336	0.311	1.56e-06	sorting nexin 9 [Source:MGI Symbol;Acc:MGI:1913866]
B cells	Ralbp1	9.75e-11	0.0578992	0.459	0.437	1.58e-06	ralA binding protein 1 [Source:MGI Symbol;Acc:MGI:108466]
B cells	Lsm2	9.78e-11	0.0723267	0.274	0.243	1.58e-06	LSM2 homolog, U6 small nuclear RNA and mRNA degradation associated [Source:MGI Symbol;Acc:MGI:90676]
B cells	Ttc5	9.87e-11	0.0534548	0.281	0.255	1.6e-06	tetratricopeptide repeat domain 5 [Source:MGI Symbol;Acc:MGI:2683584]
B cells	Rubcn	1.03e-10	0.0494921	0.361	0.334	1.67e-06	RUN domain and cysteine-rich domain containing, Beclin 1-interacting protein [Source:MGI Symbol;Acc:MGI:1915160]
B cells	Immt	1.05e-10	0.0454679	0.434	0.411	1.7e-06	inner membrane protein, mitochondrial [Source:MGI Symbol;Acc:MGI:1923864]
B cells	Fermt3	1.08e-10	0.00787912	0.657	0.657	1.75e-06	fermitin family member 3 [Source:MGI Symbol;Acc:MGI:2147790]
B cells	Mea1	1.1e-10	0.0828867	0.236	0.184	1.77e-06	male enhanced antigen 1 [Source:MGI Symbol;Acc:MGI:96957]
B cells	Cox17	1.16e-10	0.00180139	0.663	0.681	1.88e-06	cytochrome c oxidase assembly protein 17, copper chaperone [Source:MGI Symbol;Acc:MGI:1333806]
B cells	Vrk1	1.18e-10	0.0649505	0.257	0.226	1.91e-06	vaccinia related kinase 1 [Source:MGI Symbol;Acc:MGI:1261847]
B cells	Pspc1	1.18e-10	0.0648532	0.269	0.229	1.91e-06	paraspeckle protein 1 [Source:MGI Symbol;Acc:MGI:1913895]
B cells	Jarid2	1.2e-10	0.0500383	0.377	0.35	1.94e-06	jumonji, AT rich interactive domain 2 [Source:MGI Symbol;Acc:MGI:104813]
B cells	Otub1	1.21e-10	0.071064	0.272	0.233	1.96e-06	OTU domain, ubiquitin aldehyde binding 1 [Source:MGI Symbol;Acc:MGI:2147616]
B cells	Gtf2f1	1.22e-10	0.093794	0.232	0.185	1.97e-06	general transcription factor IIF, polypeptide 1 [Source:MGI Symbol;Acc:MGI:1923848]
B cells	Exosc1	1.32e-10	0.0569911	0.303	0.275	2.13e-06	exosome component 1 [Source:MGI Symbol;Acc:MGI:1913833]
B cells	Srpk1	1.32e-10	0.0421189	0.402	0.394	2.13e-06	serine/arginine-rich protein specific kinase 1 [Source:MGI Symbol;Acc:MGI:106908]
B cells	Actr2	1.34e-10	-0.0151112	0.838	0.857	2.17e-06	ARP2 actin-related protein 2 [Source:MGI Symbol;Acc:MGI:1913963]
B cells	Sesn1	1.36e-10	0.0538228	0.298	0.274	2.19e-06	sestrin 1 [Source:MGI Symbol;Acc:MGI:2155278]
B cells	Avl9	1.39e-10	0.057934	0.295	0.244	2.24e-06	AVL9 cell migration associated [Source:MGI Symbol;Acc:MGI:1926187]
B cells	Zcchc17	1.4e-10	0.0529329	0.298	0.271	2.26e-06	zinc finger, CCHC domain containing 17 [Source:MGI Symbol;Acc:MGI:1919955]
B cells	Timm44	1.48e-10	0.0756757	0.252	0.212	2.39e-06	translocase of inner mitochondrial membrane 44 [Source:MGI Symbol;Acc:MGI:1343262]
B cells	Rab24	1.5e-10	0.0665708	0.264	0.233	2.42e-06	RAB24, member RAS oncogene family [Source:MGI Symbol;Acc:MGI:105065]
B cells	Lyrm2	1.5e-10	0.103216	0.224	0.162	2.43e-06	LYR motif containing 2 [Source:MGI Symbol;Acc:MGI:1917573]
B cells	Cdc42se1	1.52e-10	0.0374215	0.472	0.463	2.45e-06	CDC42 small effector 1 [Source:MGI Symbol;Acc:MGI:1889510]
B cells	Rexo1	1.53e-10	0.0478601	0.306	0.29	2.47e-06	REX1, RNA exonuclease 1 [Source:MGI Symbol;Acc:MGI:1914182]
B cells	Yipf1	1.61e-10	0.0553637	0.297	0.263	2.6e-06	Yip1 domain family, member 1 [Source:MGI Symbol;Acc:MGI:1915532]
B cells	Tmcc3	1.67e-10	0.0533934	0.304	0.276	2.7e-06	transmembrane and coiled coil domains 3 [Source:MGI Symbol;Acc:MGI:2442900]
B cells	Pdrg1	1.67e-10	0.054951	0.309	0.288	2.7e-06	p53 and DNA damage regulated 1 [Source:MGI Symbol;Acc:MGI:1915809]
B cells	Mettl1	1.68e-10	0.0895971	0.231	0.202	2.72e-06	methyltransferase like 1 [Source:MGI Symbol;Acc:MGI:1339986]
B cells	Mettl26	1.7e-10	0.0910751	0.231	0.18	2.74e-06	methyltransferase like 26 [Source:MGI Symbol;Acc:MGI:1915597]
B cells	Pop7	1.73e-10	0.0963096	0.222	0.166	2.79e-06	processing of precursor 7, ribonuclease P family, (S. cerevisiae) [Source:MGI Symbol;Acc:MGI:1921347]
B cells	Hspa14	1.75e-10	0.0577074	0.271	0.239	2.83e-06	heat shock protein 14 [Source:MGI Symbol;Acc:MGI:1354164]
B cells	Psmg2	1.76e-10	0.0660184	0.277	0.232	2.84e-06	proteasome (prosome, macropain) assembly chaperone 2 [Source:MGI Symbol;Acc:MGI:1922901]
B cells	Smc6	1.85e-10	-0.013903	0.644	0.659	2.99e-06	structural maintenance of chromosomes 6 [Source:MGI Symbol;Acc:MGI:1914491]
B cells	Trim44	1.88e-10	0.0473795	0.511	0.485	3.03e-06	tripartite motif-containing 44 [Source:MGI Symbol;Acc:MGI:1931835]
B cells	2610001J05Rik	1.96e-10	0.0768332	0.248	0.21	3.17e-06	RIKEN cDNA 2610001J05 gene [Source:MGI Symbol;Acc:MGI:1913770]
B cells	Farsb	2.05e-10	0.0419074	0.354	0.349	3.31e-06	phenylalanyl-tRNA synthetase, beta subunit [Source:MGI Symbol;Acc:MGI:1346035]
B cells	Hist1h4d	2.11e-10	0.113717	0.216	0.143	3.41e-06	NA
B cells	Trim34a	2.19e-10	0.0447066	0.443	0.434	3.55e-06	tripartite motif-containing 34A [Source:MGI Symbol;Acc:MGI:2137359]
B cells	Nol12	2.33e-10	0.0761725	0.241	0.193	3.77e-06	nucleolar protein 12 [Source:MGI Symbol;Acc:MGI:2146285]
B cells	Zrsr2	2.4e-10	0.0481025	0.359	0.342	3.88e-06	zinc finger (CCCH type), RNA binding motif and serine/arginine rich 2 [Source:MGI Symbol;Acc:MGI:103287]
B cells	Sar1b	2.47e-10	0.0753696	0.241	0.197	3.98e-06	secretion associated Ras related GTPase 1B [Source:MGI Symbol;Acc:MGI:1913647]
B cells	Pgp	2.47e-10	0.0565297	0.298	0.262	3.99e-06	phosphoglycolate phosphatase [Source:MGI Symbol;Acc:MGI:1914328]
B cells	Spag7	2.55e-10	0.0565158	0.279	0.249	4.12e-06	sperm associated antigen 7 [Source:MGI Symbol;Acc:MGI:107380]
B cells	Cfp	2.56e-10	0.118998	0.211	0.175	4.13e-06	complement factor properdin [Source:MGI Symbol;Acc:MGI:97545]
B cells	Crlf3	2.59e-10	0.0183954	0.677	0.677	4.18e-06	cytokine receptor-like factor 3 [Source:MGI Symbol;Acc:MGI:1860086]
B cells	Rala	2.73e-10	0.0462918	0.304	0.281	4.42e-06	v-ral simian leukemia viral oncogene A (ras related) [Source:MGI Symbol;Acc:MGI:1927243]
B cells	Arfrp1	2.76e-10	0.0534008	0.272	0.238	4.46e-06	ADP-ribosylation factor related protein 1 [Source:MGI Symbol;Acc:MGI:1923938]
B cells	Atp2b1	2.77e-10	0.0470259	0.605	0.605	4.48e-06	ATPase, Ca++ transporting, plasma membrane 1 [Source:MGI Symbol;Acc:MGI:104653]
B cells	Ik	2.79e-10	0.0461028	0.471	0.46	4.5e-06	IK cytokine [Source:MGI Symbol;Acc:MGI:1345142]
B cells	Bccip	2.79e-10	0.0531984	0.319	0.297	4.5e-06	BRCA2 and CDKN1A interacting protein [Source:MGI Symbol;Acc:MGI:1913415]
B cells	Rpn2	2.79e-10	0.0431122	0.406	0.382	4.5e-06	ribophorin II [Source:MGI Symbol;Acc:MGI:98085]
B cells	Smc3	2.8e-10	0.0544602	0.415	0.385	4.52e-06	structural maintenance of chromosomes 3 [Source:MGI Symbol;Acc:MGI:1339795]
B cells	Ankhd1	2.8e-10	0.0438329	0.453	0.444	4.52e-06	ankyrin repeat and KH domain containing 1 [Source:MGI Symbol;Acc:MGI:1921733]
B cells	Gspt1	2.93e-10	0.04821	0.465	0.439	4.74e-06	G1 to S phase transition 1 [Source:MGI Symbol;Acc:MGI:1316728]
B cells	Maf1	2.96e-10	0.0416361	0.34	0.329	4.78e-06	MAF1 homolog, negative regulator of RNA polymerase III [Source:MGI Symbol;Acc:MGI:1916127]
B cells	Lyar	2.99e-10	0.0624762	0.296	0.27	4.84e-06	Ly1 antibody reactive clone [Source:MGI Symbol;Acc:MGI:107470]
B cells	Mdp1	3e-10	0.0555902	0.283	0.256	4.85e-06	magnesium-dependent phosphatase 1 [Source:MGI Symbol;Acc:MGI:1915131]
B cells	Ier3ip1	3.01e-10	0.0415768	0.476	0.449	4.86e-06	immediate early response 3 interacting protein 1 [Source:MGI Symbol;Acc:MGI:1913441]
B cells	2810004N23Rik	3.01e-10	0.0464279	0.351	0.328	4.86e-06	RIKEN cDNA 2810004N23 gene [Source:MGI Symbol;Acc:MGI:1913773]
B cells	Gtf2b	3.09e-10	0.0767629	0.249	0.192	5e-06	general transcription factor IIB [Source:MGI Symbol;Acc:MGI:2385191]
B cells	Taf7	3.14e-10	0.0903205	0.227	0.176	5.07e-06	TATA-box binding protein associated factor 7 [Source:MGI Symbol;Acc:MGI:1346348]
B cells	Rab1b	3.22e-10	0.0676274	0.25	0.211	5.21e-06	RAB1B, member RAS oncogene family [Source:MGI Symbol;Acc:MGI:1923558]
B cells	Rab11a	3.33e-10	0.0553112	0.266	0.235	5.38e-06	RAB11A, member RAS oncogene family [Source:MGI Symbol;Acc:MGI:1858202]
B cells	Ncoa7	3.36e-10	0.0735687	0.262	0.242	5.42e-06	nuclear receptor coactivator 7 [Source:MGI Symbol;Acc:MGI:2444847]
B cells	Ncoa3	3.41e-10	0.0393187	0.407	0.386	5.51e-06	nuclear receptor coactivator 3 [Source:MGI Symbol;Acc:MGI:1276535]
B cells	Ankrd44	3.48e-10	0.0399925	0.66	0.653	5.63e-06	ankyrin repeat domain 44 [Source:MGI Symbol;Acc:MGI:3045243]
B cells	Lyl1	3.49e-10	0.0426565	0.374	0.356	5.63e-06	lymphoblastomic leukemia 1 [Source:MGI Symbol;Acc:MGI:96891]
B cells	Wdr61	3.59e-10	0.0826603	0.241	0.196	5.8e-06	WD repeat domain 61 [Source:MGI Symbol;Acc:MGI:1917493]
B cells	Ccnh	3.61e-10	0.0721133	0.248	0.212	5.83e-06	cyclin H [Source:MGI Symbol;Acc:MGI:1913921]
B cells	Krcc1	3.65e-10	0.0408345	0.427	0.395	5.9e-06	lysine-rich coiled-coil 1 [Source:MGI Symbol;Acc:MGI:1889377]
B cells	Chmp5	3.95e-10	0.0500495	0.288	0.265	6.38e-06	charged multivesicular body protein 5 [Source:MGI Symbol;Acc:MGI:1924209]
B cells	Vps13a	3.96e-10	0.0464289	0.565	0.548	6.41e-06	vacuolar protein sorting 13A [Source:MGI Symbol;Acc:MGI:2444304]
B cells	Taf12	4.06e-10	0.095847	0.221	0.165	6.56e-06	TATA-box binding protein associated factor 12 [Source:MGI Symbol;Acc:MGI:1913714]
B cells	Nol11	4.11e-10	0.060069	0.273	0.24	6.64e-06	nucleolar protein 11 [Source:MGI Symbol;Acc:MGI:1916229]
B cells	Iqsec1	4.16e-10	0.0361831	0.479	0.449	6.71e-06	IQ motif and Sec7 domain 1 [Source:MGI Symbol;Acc:MGI:1196356]
B cells	Zcchc9	4.17e-10	0.0718732	0.255	0.21	6.74e-06	zinc finger, CCHC domain containing 9 [Source:MGI Symbol;Acc:MGI:1916335]
B cells	Fam50a	4.17e-10	0.0637417	0.256	0.223	6.74e-06	family with sequence similarity 50, member A [Source:MGI Symbol;Acc:MGI:1351626]
B cells	Snap29	4.2e-10	0.0549184	0.297	0.265	6.78e-06	synaptosomal-associated protein 29 [Source:MGI Symbol;Acc:MGI:1914724]
B cells	Ccni	4.28e-10	0.0340933	0.513	0.502	6.91e-06	cyclin I [Source:MGI Symbol;Acc:MGI:1341077]
B cells	Cdc26	4.3e-10	0.0416111	0.327	0.301	6.94e-06	cell division cycle 26 [Source:MGI Symbol;Acc:MGI:1913690]
B cells	Trappc3	4.53e-10	0.0996	0.223	0.159	7.31e-06	trafficking protein particle complex 3 [Source:MGI Symbol;Acc:MGI:1351486]
B cells	Zfp292	4.61e-10	0.0246961	0.672	0.652	7.44e-06	zinc finger protein 292 [Source:MGI Symbol;Acc:MGI:1353423]
B cells	Rbbp4	4.63e-10	0.0374276	0.474	0.467	7.49e-06	retinoblastoma binding protein 4, chromatin remodeling factor [Source:MGI Symbol;Acc:MGI:1194912]
B cells	Glod4	4.66e-10	0.113068	0.22	0.146	7.53e-06	glyoxalase domain containing 4 [Source:MGI Symbol;Acc:MGI:1914451]
B cells	Phf20	4.8e-10	0.0603213	0.262	0.232	7.75e-06	PHD finger protein 20 [Source:MGI Symbol;Acc:MGI:2444148]
B cells	Gm2000	4.82e-10	0.0749192	0.239	0.194	7.79e-06	predicted gene 2000 [Source:MGI Symbol;Acc:MGI:3780170]
B cells	Ap3b1	4.91e-10	0.0569911	0.284	0.258	7.93e-06	adaptor-related protein complex 3, beta 1 subunit [Source:MGI Symbol;Acc:MGI:1333879]
B cells	Wdr12	5.31e-10	0.0690136	0.258	0.234	8.58e-06	WD repeat domain 12 [Source:MGI Symbol;Acc:MGI:1927241]
B cells	Gm4610	5.34e-10	0.0698236	0.248	0.214	8.62e-06	predicted gene 4610 [Source:MGI Symbol;Acc:MGI:3782793]
B cells	Rraga	5.36e-10	0.0544238	0.293	0.256	8.66e-06	Ras-related GTP binding A [Source:MGI Symbol;Acc:MGI:1915691]
B cells	2210016F16Rik	5.54e-10	0.0637894	0.253	0.212	8.96e-06	RIKEN cDNA 2210016F16 gene [Source:MGI Symbol;Acc:MGI:1917403]
B cells	Glrx5	5.68e-10	0.0523247	0.312	0.291	9.17e-06	glutaredoxin 5 [Source:MGI Symbol;Acc:MGI:1920296]
B cells	Mia2	5.74e-10	0.0420296	0.489	0.456	9.27e-06	MIA SH3 domain ER export factor 2 [Source:MGI Symbol;Acc:MGI:2159614]
B cells	Igha	5.77e-10	-0.320321	0.522	0.626	9.32e-06	immunoglobulin heavy constant alpha [Source:MGI Symbol;Acc:MGI:96444]
B cells	Rbm5	5.8e-10	-0.0117292	0.785	0.795	9.37e-06	RNA binding motif protein 5 [Source:MGI Symbol;Acc:MGI:1933204]
B cells	Pigp	5.83e-10	0.0992541	0.218	0.162	9.42e-06	phosphatidylinositol glycan anchor biosynthesis, class P [Source:MGI Symbol;Acc:MGI:1860433]
B cells	Stk11	5.87e-10	0.036344	0.366	0.339	9.49e-06	serine/threonine kinase 11 [Source:MGI Symbol;Acc:MGI:1341870]
B cells	Ndufv1	5.89e-10	0.0844959	0.229	0.181	9.51e-06	NADH:ubiquinone oxidoreductase core subunit V1 [Source:MGI Symbol;Acc:MGI:107851]
B cells	Fmr1	5.93e-10	0.0549237	0.297	0.268	9.58e-06	FMRP translational regulator 1 [Source:MGI Symbol;Acc:MGI:95564]
B cells	Hcfc1r1	5.97e-10	0.0599414	0.253	0.212	9.65e-06	host cell factor C1 regulator 1 (XPO1-dependent) [Source:MGI Symbol;Acc:MGI:2663619]
B cells	Ndufa9	6.06e-10	0.0785805	0.238	0.192	9.8e-06	NADH:ubiquinone oxidoreductase subunit A9 [Source:MGI Symbol;Acc:MGI:1913358]
B cells	Spg21	6.1e-10	0.0689012	0.258	0.216	9.86e-06	SPG21, maspardin [Source:MGI Symbol;Acc:MGI:106403]
B cells	Pcnt	6.11e-10	0.0620817	0.25	0.211	9.88e-06	pericentrin (kendrin) [Source:MGI Symbol;Acc:MGI:102722]
B cells	Etfa	6.23e-10	0.0650311	0.251	0.212	1.01e-05	electron transferring flavoprotein, alpha polypeptide [Source:MGI Symbol;Acc:MGI:106092]
B cells	Klf13	6.33e-10	0.0344292	0.546	0.527	1.02e-05	Kruppel-like factor 13 [Source:MGI Symbol;Acc:MGI:1354948]
B cells	Cd2ap	6.39e-10	0.0134061	0.723	0.713	1.03e-05	CD2-associated protein [Source:MGI Symbol;Acc:MGI:1330281]
B cells	Dgkd	6.45e-10	0.0566693	0.561	0.532	1.04e-05	diacylglycerol kinase, delta [Source:MGI Symbol;Acc:MGI:2138334]
B cells	Micu2	6.46e-10	0.0974743	0.216	0.163	1.04e-05	mitochondrial calcium uptake 2 [Source:MGI Symbol;Acc:MGI:1915764]
B cells	Tmed3	6.52e-10	0.0808254	0.233	0.185	1.05e-05	transmembrane p24 trafficking protein 3 [Source:MGI Symbol;Acc:MGI:1913361]
B cells	Sltm	6.58e-10	0.0213132	0.637	0.627	1.06e-05	SAFB-like, transcription modulator [Source:MGI Symbol;Acc:MGI:1913910]
B cells	Ube2k	6.73e-10	0.0434813	0.489	0.478	1.09e-05	ubiquitin-conjugating enzyme E2K [Source:MGI Symbol;Acc:MGI:1858216]
B cells	Rbm42	6.77e-10	0.0411482	0.329	0.29	1.09e-05	RNA binding motif protein 42 [Source:MGI Symbol;Acc:MGI:1915285]
B cells	Rsl1d1	7.11e-10	0.0472786	0.39	0.373	1.15e-05	ribosomal L1 domain containing 1 [Source:MGI Symbol;Acc:MGI:1913659]
B cells	Nolc1	7.31e-10	0.0627464	0.329	0.323	1.18e-05	nucleolar and coiled-body phosphoprotein 1 [Source:MGI Symbol;Acc:MGI:1918019]
B cells	Usp8	7.41e-10	0.043032	0.298	0.277	1.2e-05	ubiquitin specific peptidase 8 [Source:MGI Symbol;Acc:MGI:1934029]
B cells	Smarcd1	7.48e-10	0.107909	0.215	0.14	1.21e-05	SWI/SNF related, matrix associated, actin dependent regulator of chromatin, subfamily d, member 1 [Source:MGI Symbol;Acc:MGI:1933623]
B cells	Med30	7.51e-10	0.0753472	0.24	0.188	1.21e-05	mediator complex subunit 30 [Source:MGI Symbol;Acc:MGI:1917040]
B cells	Gcc2	7.58e-10	0.0521741	0.298	0.29	1.23e-05	GRIP and coiled-coil domain containing 2 [Source:MGI Symbol;Acc:MGI:1917547]
B cells	Notch2	7.6e-10	0.0356325	0.378	0.368	1.23e-05	notch 2 [Source:MGI Symbol;Acc:MGI:97364]
B cells	Mapkap1	7.62e-10	0.0540162	0.283	0.266	1.23e-05	mitogen-activated protein kinase associated protein 1 [Source:MGI Symbol;Acc:MGI:2444554]
B cells	Utp18	7.93e-10	0.0659976	0.258	0.221	1.28e-05	UTP18 small subunit processome component [Source:MGI Symbol;Acc:MGI:1923402]
B cells	Hnrnpr	8e-10	0.0309558	0.65	0.657	1.29e-05	heterogeneous nuclear ribonucleoprotein R [Source:MGI Symbol;Acc:MGI:1891692]
B cells	Card11	8.15e-10	0.0411265	0.411	0.416	1.32e-05	caspase recruitment domain family, member 11 [Source:MGI Symbol;Acc:MGI:1916978]
B cells	Slamf7	8.28e-10	0.0950387	0.22	0.177	1.34e-05	SLAM family member 7 [Source:MGI Symbol;Acc:MGI:1922595]
B cells	Mfsd4a	8.77e-10	0.132404	0.21	0.124	1.42e-05	major facilitator superfamily domain containing 4A [Source:MGI Symbol;Acc:MGI:2442786]
B cells	Il21r	8.8e-10	0.0417989	0.401	0.398	1.42e-05	interleukin 21 receptor [Source:MGI Symbol;Acc:MGI:1890475]
B cells	Sdad1	9.23e-10	0.0686572	0.251	0.206	1.49e-05	SDA1 domain containing 1 [Source:MGI Symbol;Acc:MGI:2140779]
B cells	Usp14	9.32e-10	0.0598061	0.275	0.238	1.51e-05	ubiquitin specific peptidase 14 [Source:MGI Symbol;Acc:MGI:1928898]
B cells	Pex7	9.49e-10	0.0827768	0.227	0.176	1.53e-05	peroxisomal biogenesis factor 7 [Source:MGI Symbol;Acc:MGI:1321392]
B cells	Mrps7	9.69e-10	0.0590341	0.293	0.266	1.57e-05	mitchondrial ribosomal protein S7 [Source:MGI Symbol;Acc:MGI:1354367]
B cells	Impdh2	9.83e-10	0.0398423	0.432	0.437	1.59e-05	inosine monophosphate dehydrogenase 2 [Source:MGI Symbol;Acc:MGI:109367]
B cells	Zfp91	9.84e-10	0.0341647	0.55	0.557	1.59e-05	zinc finger protein 91 [Source:MGI Symbol;Acc:MGI:104854]
B cells	Upf3a	9.9e-10	0.0593801	0.255	0.23	1.6e-05	UPF3 regulator of nonsense transcripts homolog A (yeast) [Source:MGI Symbol;Acc:MGI:1914281]
B cells	Ppm1m	1e-09	0.0520346	0.279	0.25	1.62e-05	protein phosphatase 1M [Source:MGI Symbol;Acc:MGI:1915155]
B cells	Tomm5	1.01e-09	0.0455672	0.477	0.447	1.63e-05	translocase of outer mitochondrial membrane 5 [Source:MGI Symbol;Acc:MGI:1915762]
B cells	Nom1	1.01e-09	0.0431244	0.299	0.278	1.63e-05	nucleolar protein with MIF4G domain 1 [Source:MGI Symbol;Acc:MGI:1861749]
B cells	Mrps28	1.02e-09	0.108004	0.205	0.15	1.64e-05	mitochondrial ribosomal protein S28 [Source:MGI Symbol;Acc:MGI:1913480]
B cells	Bnip1	1.02e-09	0.0641143	0.257	0.207	1.66e-05	BCL2/adenovirus E1B interacting protein 1 [Source:MGI Symbol;Acc:MGI:109328]
B cells	Tomm40	1.04e-09	0.0508369	0.291	0.257	1.68e-05	translocase of outer mitochondrial membrane 40 [Source:MGI Symbol;Acc:MGI:1858259]
B cells	Zc3h14	1.08e-09	0.0411627	0.289	0.268	1.74e-05	zinc finger CCCH type containing 14 [Source:MGI Symbol;Acc:MGI:1919824]
B cells	Bub3	1.08e-09	0.0368915	0.387	0.364	1.74e-05	BUB3 mitotic checkpoint protein [Source:MGI Symbol;Acc:MGI:1343463]
B cells	Acaa1a	1.08e-09	0.0498266	0.272	0.241	1.75e-05	acetyl-Coenzyme A acyltransferase 1A [Source:MGI Symbol;Acc:MGI:2148491]
B cells	Srp19	1.09e-09	0.0452723	0.392	0.376	1.77e-05	signal recognition particle 19 [Source:MGI Symbol;Acc:MGI:1913634]
B cells	Ngdn	1.13e-09	0.0641289	0.248	0.21	1.82e-05	neuroguidin, EIF4E binding protein [Source:MGI Symbol;Acc:MGI:1916216]
B cells	Pirb	1.15e-09	0.0677502	0.227	0.203	1.85e-05	paired Ig-like receptor B [Source:MGI Symbol;Acc:MGI:894311]
B cells	Ubald2	1.15e-09	0.0476924	0.292	0.26	1.86e-05	UBA-like domain containing 2 [Source:MGI Symbol;Acc:MGI:1914635]
B cells	Add1	1.16e-09	0.032308	0.377	0.373	1.88e-05	adducin 1 (alpha) [Source:MGI Symbol;Acc:MGI:87918]
B cells	Hsp90b1	1.16e-09	-0.0547897	0.844	0.893	1.88e-05	heat shock protein 90, beta (Grp94), member 1 [Source:MGI Symbol;Acc:MGI:98817]
B cells	Tmem60	1.16e-09	0.0868173	0.224	0.166	1.88e-05	transmembrane protein 60 [Source:MGI Symbol;Acc:MGI:2673965]
B cells	WPRE	1.18e-09	0.0855553	0.224	0.18	1.91e-05	NA
B cells	Cisd1	1.18e-09	0.0771141	0.233	0.199	1.91e-05	CDGSH iron sulfur domain 1 [Source:MGI Symbol;Acc:MGI:1261855]
B cells	Cd82	1.19e-09	0.0469775	0.349	0.339	1.93e-05	CD82 antigen [Source:MGI Symbol;Acc:MGI:104651]
B cells	Tor1aip1	1.21e-09	0.0273881	0.625	0.621	1.96e-05	torsin A interacting protein 1 [Source:MGI Symbol;Acc:MGI:3582693]
B cells	Ppwd1	1.22e-09	0.0445335	0.301	0.282	1.96e-05	peptidylprolyl isomerase domain and WD repeat containing 1 [Source:MGI Symbol;Acc:MGI:2443069]
B cells	Cnpy2	1.25e-09	0.0812137	0.235	0.185	2.03e-05	canopy FGF signaling regulator 2 [Source:MGI Symbol;Acc:MGI:1928477]
B cells	Mrpl19	1.28e-09	0.0720412	0.239	0.198	2.07e-05	mitochondrial ribosomal protein L19 [Source:MGI Symbol;Acc:MGI:1926274]
B cells	Bfsp2	1.28e-09	0.0916355	0.215	0.172	2.08e-05	beaded filament structural protein 2, phakinin [Source:MGI Symbol;Acc:MGI:1333828]
B cells	Dnm1l	1.29e-09	0.0477331	0.272	0.25	2.08e-05	dynamin 1-like [Source:MGI Symbol;Acc:MGI:1921256]
B cells	Esf1	1.31e-09	0.0484857	0.346	0.325	2.12e-05	ESF1 nucleolar pre-rRNA processing protein homolog [Source:MGI Symbol;Acc:MGI:1913830]
B cells	Rnf13	1.31e-09	0.0376086	0.345	0.32	2.12e-05	ring finger protein 13 [Source:MGI Symbol;Acc:MGI:1346341]
B cells	Fam3c	1.32e-09	0.0349037	0.454	0.445	2.13e-05	family with sequence similarity 3, member C [Source:MGI Symbol;Acc:MGI:107892]
B cells	Supt20	1.33e-09	0.0303181	0.532	0.517	2.16e-05	SPT20 SAGA complex component [Source:MGI Symbol;Acc:MGI:1929651]
B cells	Smarcb1	1.35e-09	0.0449201	0.328	0.311	2.18e-05	SWI/SNF related, matrix associated, actin dependent regulator of chromatin, subfamily b, member 1 [Source:MGI Symbol;Acc:MGI:1328366]
B cells	Glrx2	1.37e-09	0.0582027	0.256	0.217	2.21e-05	glutaredoxin 2 (thioltransferase) [Source:MGI Symbol;Acc:MGI:1916617]
B cells	Psmd3	1.38e-09	0.0456667	0.299	0.27	2.23e-05	proteasome (prosome, macropain) 26S subunit, non-ATPase, 3 [Source:MGI Symbol;Acc:MGI:98858]
B cells	2310011J03Rik	1.38e-09	0.068275	0.232	0.195	2.24e-05	RIKEN cDNA 2310011J03 gene [Source:MGI Symbol;Acc:MGI:1913624]
B cells	Scaper	1.39e-09	0.104616	0.212	0.149	2.25e-05	S phase cyclin A-associated protein in the ER [Source:MGI Symbol;Acc:MGI:1925976]
B cells	Aff3	1.43e-09	0.0451807	0.366	0.356	2.31e-05	AF4/FMR2 family, member 3 [Source:MGI Symbol;Acc:MGI:106927]
B cells	Ccm2	1.46e-09	0.0367224	0.428	0.414	2.36e-05	cerebral cavernous malformation 2 [Source:MGI Symbol;Acc:MGI:2384924]
B cells	Pin1	1.46e-09	0.105236	0.215	0.151	2.36e-05	protein (peptidyl-prolyl cis/trans isomerase) NIMA-interacting 1 [Source:MGI Symbol;Acc:MGI:1346036]
B cells	Mcts1	1.48e-09	0.0501397	0.277	0.247	2.39e-05	malignant T cell amplified sequence 1 [Source:MGI Symbol;Acc:MGI:1916245]
B cells	Nsd3	1.52e-09	0.0326608	0.617	0.61	2.46e-05	nuclear receptor binding SET domain protein 3 [Source:MGI Symbol;Acc:MGI:2142581]
B cells	Thoc1	1.53e-09	0.0479908	0.289	0.261	2.48e-05	THO complex 1 [Source:MGI Symbol;Acc:MGI:1919668]
B cells	Rbm28	1.62e-09	0.0361346	0.345	0.328	2.62e-05	RNA binding motif protein 28 [Source:MGI Symbol;Acc:MGI:2655711]
B cells	Slc25a19	1.63e-09	0.0383195	0.376	0.364	2.63e-05	solute carrier family 25 (mitochondrial thiamine pyrophosphate carrier), member 19 [Source:MGI Symbol;Acc:MGI:1914533]
B cells	Lsm8	1.69e-09	0.0557849	0.261	0.225	2.73e-05	LSM8 homolog, U6 small nuclear RNA associated [Source:MGI Symbol;Acc:MGI:1923772]
B cells	Senp2	1.7e-09	0.0344959	0.365	0.332	2.74e-05	SUMO/sentrin specific peptidase 2 [Source:MGI Symbol;Acc:MGI:1923076]
B cells	Rbm7	1.7e-09	0.036187	0.317	0.291	2.74e-05	RNA binding motif protein 7 [Source:MGI Symbol;Acc:MGI:1914260]
B cells	Cyb5r3	1.72e-09	0.0513093	0.27	0.239	2.78e-05	cytochrome b5 reductase 3 [Source:MGI Symbol;Acc:MGI:94893]
B cells	Faim	1.74e-09	0.0655604	0.244	0.208	2.81e-05	Fas apoptotic inhibitory molecule [Source:MGI Symbol;Acc:MGI:1344387]
B cells	Znhit6	1.75e-09	0.059384	0.247	0.22	2.83e-05	zinc finger, HIT type 6 [Source:MGI Symbol;Acc:MGI:1916996]
B cells	Dynll1	1.79e-09	-0.0345958	0.724	0.759	2.89e-05	dynein light chain LC8-type 1 [Source:MGI Symbol;Acc:MGI:1861457]
B cells	Nmd3	1.81e-09	0.0621811	0.243	0.204	2.93e-05	NMD3 ribosome export adaptor [Source:MGI Symbol;Acc:MGI:2140103]
B cells	Tpd52l2	1.85e-09	0.0798298	0.228	0.184	2.99e-05	tumor protein D52-like 2 [Source:MGI Symbol;Acc:MGI:1913564]
B cells	Cops8	1.86e-09	0.064095	0.252	0.214	3e-05	COP9 signalosome subunit 8 [Source:MGI Symbol;Acc:MGI:1915363]
B cells	Phax	1.89e-09	0.102942	0.204	0.15	3.05e-05	phosphorylated adaptor for RNA export [Source:MGI Symbol;Acc:MGI:1891839]
B cells	Prpf31	1.96e-09	0.0731051	0.234	0.183	3.17e-05	pre-mRNA processing factor 31 [Source:MGI Symbol;Acc:MGI:1916238]
B cells	2310009A05Rik	1.97e-09	0.0620528	0.253	0.217	3.18e-05	NA
B cells	Uvssa	1.98e-09	0.0627048	0.249	0.212	3.2e-05	UV stimulated scaffold protein A [Source:MGI Symbol;Acc:MGI:1918351]
B cells	Mrpl2	1.99e-09	0.093439	0.217	0.16	3.22e-05	mitochondrial ribosomal protein L2 [Source:MGI Symbol;Acc:MGI:1351622]
B cells	Tpd52	2e-09	0.032429	0.419	0.411	3.23e-05	tumor protein D52 [Source:MGI Symbol;Acc:MGI:107749]
B cells	U2surp	2.03e-09	0.0405918	0.507	0.487	3.28e-05	U2 snRNP-associated SURP domain containing [Source:MGI Symbol;Acc:MGI:1915208]
B cells	Tcerg1	2.09e-09	0.0423289	0.415	0.396	3.37e-05	transcription elongation regulator 1 (CA150) [Source:MGI Symbol;Acc:MGI:1926421]
B cells	Ccdc28b	2.1e-09	0.123345	0.189	0.14	3.4e-05	coiled coil domain containing 28B [Source:MGI Symbol;Acc:MGI:1913514]
B cells	Rdx	2.16e-09	0.0331702	0.403	0.384	3.49e-05	radixin [Source:MGI Symbol;Acc:MGI:97887]
B cells	Csnk1g3	2.18e-09	0.0362378	0.474	0.462	3.53e-05	casein kinase 1, gamma 3 [Source:MGI Symbol;Acc:MGI:1917675]
B cells	Arhgap25	2.22e-09	0.0367957	0.482	0.454	3.58e-05	Rho GTPase activating protein 25 [Source:MGI Symbol;Acc:MGI:2443687]
B cells	Ccdc124	2.27e-09	0.056029	0.256	0.224	3.68e-05	coiled-coil domain containing 124 [Source:MGI Symbol;Acc:MGI:1916403]
B cells	Gtpbp4	2.29e-09	0.0283127	0.433	0.416	3.69e-05	GTP binding protein 4 [Source:MGI Symbol;Acc:MGI:1916487]
B cells	Borcs8	2.37e-09	0.0830839	0.231	0.188	3.83e-05	BLOC-1 related complex subunit 8 [Source:MGI Symbol;Acc:MGI:1919618]
B cells	Prpf19	2.37e-09	0.0508186	0.27	0.24	3.83e-05	pre-mRNA processing factor 19 [Source:MGI Symbol;Acc:MGI:106247]
B cells	Las1l	2.43e-09	0.052373	0.281	0.258	3.93e-05	LAS1-like (S. cerevisiae) [Source:MGI Symbol;Acc:MGI:1923380]
B cells	Mbtps1	2.52e-09	0.0328542	0.336	0.327	4.07e-05	membrane-bound transcription factor peptidase, site 1 [Source:MGI Symbol;Acc:MGI:1927235]
B cells	Nemf	2.59e-09	0.0298174	0.443	0.43	4.19e-05	nuclear export mediator factor [Source:MGI Symbol;Acc:MGI:1918305]
B cells	Fibp	2.64e-09	0.101361	0.204	0.152	4.27e-05	fibroblast growth factor (acidic) intracellular binding protein [Source:MGI Symbol;Acc:MGI:1926233]
B cells	Hck	2.66e-09	0.042155	0.318	0.31	4.3e-05	hemopoietic cell kinase [Source:MGI Symbol;Acc:MGI:96052]
B cells	Nvl	2.85e-09	0.0395362	0.32	0.296	4.6e-05	nuclear VCP-like [Source:MGI Symbol;Acc:MGI:1914709]
B cells	Dmac1	2.85e-09	0.0488825	0.352	0.326	4.61e-05	distal membrane arm assembly complex 1 [Source:MGI Symbol;Acc:MGI:1914178]
B cells	Vdac1	2.86e-09	0.0448611	0.32	0.289	4.62e-05	voltage-dependent anion channel 1 [Source:MGI Symbol;Acc:MGI:106919]
B cells	Hadhb	2.88e-09	0.031205	0.36	0.344	4.66e-05	hydroxyacyl-CoA dehydrogenase trifunctional multienzyme complex subunit beta [Source:MGI Symbol;Acc:MGI:2136381]
B cells	Paxbp1	2.93e-09	0.0462272	0.291	0.267	4.74e-05	PAX3 and PAX7 binding protein 1 [Source:MGI Symbol;Acc:MGI:1914617]
B cells	Mrpl41	2.93e-09	0.053879	0.268	0.233	4.74e-05	mitochondrial ribosomal protein L41 [Source:MGI Symbol;Acc:MGI:1333816]
B cells	Ndufs6	2.94e-09	0.0412131	0.417	0.387	4.74e-05	NADH:ubiquinone oxidoreductase core subunit S6 [Source:MGI Symbol;Acc:MGI:107932]
B cells	Tmem219	2.94e-09	0.0592169	0.242	0.205	4.76e-05	transmembrane protein 219 [Source:MGI Symbol;Acc:MGI:1915992]
B cells	N6amt1	2.95e-09	0.0968132	0.208	0.151	4.76e-05	N-6 adenine-specific DNA methyltransferase 1 (putative) [Source:MGI Symbol;Acc:MGI:1915018]
B cells	Susd6	3e-09	0.038529	0.407	0.378	4.84e-05	sushi domain containing 6 [Source:MGI Symbol;Acc:MGI:2444661]
B cells	Ufsp2	3.03e-09	0.0614234	0.231	0.205	4.9e-05	UFM1-specific peptidase 2 [Source:MGI Symbol;Acc:MGI:1913679]
B cells	Necap2	3.08e-09	0.0476841	0.278	0.239	4.98e-05	NECAP endocytosis associated 2 [Source:MGI Symbol;Acc:MGI:1913397]
B cells	Polr2h	3.16e-09	0.0806771	0.222	0.184	5.1e-05	polymerase (RNA) II (DNA directed) polypeptide H [Source:MGI Symbol;Acc:MGI:2384309]
B cells	Pik3ap1	3.16e-09	0.0571767	0.454	0.443	5.11e-05	phosphoinositide-3-kinase adaptor protein 1 [Source:MGI Symbol;Acc:MGI:1933177]
B cells	Ppp4c	3.19e-09	0.0378387	0.438	0.426	5.15e-05	protein phosphatase 4, catalytic subunit [Source:MGI Symbol;Acc:MGI:1891763]
B cells	Crtc3	3.19e-09	0.0463211	0.276	0.252	5.16e-05	CREB regulated transcription coactivator 3 [Source:MGI Symbol;Acc:MGI:1917711]
B cells	Odc1	3.21e-09	0.0630766	0.302	0.244	5.19e-05	ornithine decarboxylase, structural 1 [Source:MGI Symbol;Acc:MGI:97402]
B cells	Ube2v2	3.22e-09	0.0357664	0.326	0.301	5.2e-05	ubiquitin-conjugating enzyme E2 variant 2 [Source:MGI Symbol;Acc:MGI:1917870]
B cells	Tet2	3.25e-09	0.0408691	0.354	0.341	5.25e-05	tet methylcytosine dioxygenase 2 [Source:MGI Symbol;Acc:MGI:2443298]
B cells	Rlim	3.29e-09	0.0301261	0.364	0.354	5.31e-05	ring finger protein, LIM domain interacting [Source:MGI Symbol;Acc:MGI:1342291]
B cells	Ppp1cc	3.29e-09	0.02246	0.533	0.524	5.31e-05	protein phosphatase 1 catalytic subunit gamma [Source:MGI Symbol;Acc:MGI:104872]
B cells	Smu1	3.32e-09	0.0431074	0.268	0.244	5.36e-05	smu-1 suppressor of mec-8 and unc-52 homolog (C. elegans) [Source:MGI Symbol;Acc:MGI:1915546]
B cells	Emc7	3.35e-09	0.0386576	0.331	0.307	5.41e-05	ER membrane protein complex subunit 7 [Source:MGI Symbol;Acc:MGI:1920274]
B cells	Rps19bp1	3.4e-09	0.0883333	0.214	0.168	5.49e-05	ribosomal protein S19 binding protein 1 [Source:MGI Symbol;Acc:MGI:1913788]
B cells	Icam2	3.45e-09	0.0587167	0.247	0.214	5.57e-05	intercellular adhesion molecule 2 [Source:MGI Symbol;Acc:MGI:96394]
B cells	Cdc123	3.55e-09	0.0543029	0.247	0.222	5.74e-05	cell division cycle 123 [Source:MGI Symbol;Acc:MGI:2138811]
B cells	2022-09-11	3.57e-09	0.0317822	0.428	0.425	5.78e-05	NA
B cells	Kmt2b	3.64e-09	0.0311973	0.34	0.343	5.88e-05	lysine (K)-specific methyltransferase 2B [Source:MGI Symbol;Acc:MGI:109565]
B cells	Relb	3.66e-09	0.0457676	0.259	0.233	5.91e-05	avian reticuloendotheliosis viral (v-rel) oncogene related B [Source:MGI Symbol;Acc:MGI:103289]
B cells	Icosl	3.82e-09	0.0327926	0.367	0.344	6.17e-05	icos ligand [Source:MGI Symbol;Acc:MGI:1354701]
B cells	Anapc11	3.85e-09	0.0389832	0.29	0.272	6.22e-05	anaphase promoting complex subunit 11 [Source:MGI Symbol;Acc:MGI:1913406]
B cells	Mpg	3.98e-09	0.0928073	0.206	0.153	6.43e-05	N-methylpurine-DNA glycosylase [Source:MGI Symbol;Acc:MGI:97073]
B cells	Zzz3	4.05e-09	0.042661	0.348	0.34	6.54e-05	zinc finger, ZZ domain containing 3 [Source:MGI Symbol;Acc:MGI:1920453]
B cells	Ctdspl2	4.06e-09	0.0410444	0.278	0.262	6.55e-05	CTD (carboxy-terminal domain, RNA polymerase II, polypeptide A) small phosphatase like 2 [Source:MGI Symbol;Acc:MGI:1196405]
B cells	Gadd45b	4.11e-09	0.0825462	0.237	0.209	6.65e-05	growth arrest and DNA-damage-inducible 45 beta [Source:MGI Symbol;Acc:MGI:107776]
B cells	Usf3	4.12e-09	0.0415611	0.261	0.234	6.66e-05	upstream transcription factor family member 3 [Source:MGI Symbol;Acc:MGI:2685454]
B cells	Med8	4.2e-09	0.0514288	0.255	0.227	6.78e-05	mediator complex subunit 8 [Source:MGI Symbol;Acc:MGI:1915269]
B cells	Zfp608	4.2e-09	0.093389	0.204	0.16	6.79e-05	zinc finger protein 608 [Source:MGI Symbol;Acc:MGI:2442338]
B cells	Zfp622	4.23e-09	0.0292711	0.335	0.327	6.83e-05	zinc finger protein 622 [Source:MGI Symbol;Acc:MGI:1289282]
B cells	Usp15	4.26e-09	0.0372971	0.5	0.484	6.88e-05	ubiquitin specific peptidase 15 [Source:MGI Symbol;Acc:MGI:101857]
B cells	Cast	4.34e-09	0.0373804	0.424	0.418	7.01e-05	calpastatin [Source:MGI Symbol;Acc:MGI:1098236]
B cells	Epb41	4.34e-09	0.0442056	0.335	0.322	7.01e-05	erythrocyte membrane protein band 4.1 [Source:MGI Symbol;Acc:MGI:95401]
B cells	Kmt2e	4.36e-09	-0.0385478	0.773	0.794	7.05e-05	lysine (K)-specific methyltransferase 2E [Source:MGI Symbol;Acc:MGI:1924825]
B cells	Smim12	4.56e-09	0.0878673	0.214	0.158	7.37e-05	small integral membrane protein 12 [Source:MGI Symbol;Acc:MGI:1933141]
B cells	Nipbl	4.56e-09	0.0130406	0.718	0.727	7.37e-05	NIPBL cohesin loading factor [Source:MGI Symbol;Acc:MGI:1913976]
B cells	Txndc5	4.67e-09	0.0179324	0.475	0.45	7.54e-05	thioredoxin domain containing 5 [Source:MGI Symbol;Acc:MGI:2145316]
B cells	Lactb	4.79e-09	0.0407145	0.304	0.282	7.74e-05	lactamase, beta [Source:MGI Symbol;Acc:MGI:1933395]
B cells	3830406C13Rik	4.81e-09	0.0319001	0.316	0.293	7.78e-05	RIKEN cDNA 3830406C13 gene [Source:MGI Symbol;Acc:MGI:1917937]
B cells	Ybx3	4.83e-09	0.0692127	0.266	0.243	7.81e-05	Y box protein 3 [Source:MGI Symbol;Acc:MGI:2137670]
B cells	Kynu	4.89e-09	0.0636423	0.237	0.199	7.9e-05	kynureninase [Source:MGI Symbol;Acc:MGI:1918039]
B cells	Herc6	4.95e-09	0.0923036	0.208	0.167	7.99e-05	hect domain and RLD 6 [Source:MGI Symbol;Acc:MGI:1914388]
B cells	Thoc2	4.96e-09	0.0316964	0.509	0.504	8.02e-05	THO complex 2 [Source:MGI Symbol;Acc:MGI:2442413]
B cells	Gnai3	5.09e-09	0.038229	0.334	0.322	8.22e-05	guanine nucleotide binding protein (G protein), alpha inhibiting 3 [Source:MGI Symbol;Acc:MGI:95773]
B cells	Fkbp8	5.2e-09	0.0353303	0.457	0.434	8.4e-05	FK506 binding protein 8 [Source:MGI Symbol;Acc:MGI:1341070]
B cells	P2rx4	5.28e-09	0.0300353	0.393	0.372	8.54e-05	purinergic receptor P2X, ligand-gated ion channel 4 [Source:MGI Symbol;Acc:MGI:1338859]
B cells	Atp13a2	5.32e-09	0.0453129	0.3	0.278	8.6e-05	ATPase type 13A2 [Source:MGI Symbol;Acc:MGI:1922022]
B cells	Birc3	5.41e-09	0.0513816	0.556	0.523	8.75e-05	baculoviral IAP repeat-containing 3 [Source:MGI Symbol;Acc:MGI:1197007]
B cells	Rab3gap1	5.43e-09	0.0256042	0.373	0.359	8.78e-05	RAB3 GTPase activating protein subunit 1 [Source:MGI Symbol;Acc:MGI:2445001]
B cells	Zc3h15	5.48e-09	0.024012	0.544	0.553	8.85e-05	zinc finger CCCH-type containing 15 [Source:MGI Symbol;Acc:MGI:1919747]
B cells	Pcsk7	5.52e-09	0.100784	0.203	0.139	8.91e-05	proprotein convertase subtilisin/kexin type 7 [Source:MGI Symbol;Acc:MGI:107421]
B cells	Rab5c	5.68e-09	0.036772	0.423	0.411	9.17e-05	RAB5C, member RAS oncogene family [Source:MGI Symbol;Acc:MGI:105306]
B cells	Bin3	6.19e-09	0.077528	0.218	0.169	0.000100044	bridging integrator 3 [Source:MGI Symbol;Acc:MGI:1929883]
B cells	Smarcad1	6.2e-09	0.0501118	0.242	0.216	0.000100108	SWI/SNF-related, matrix-associated actin-dependent regulator of chromatin, subfamily a, containing DEAD/H box 1 [Source:MGI Symbol;Acc:MGI:95453]
B cells	Parp2	6.3e-09	0.0612157	0.23	0.199	0.000101716	poly (ADP-ribose) polymerase family, member 2 [Source:MGI Symbol;Acc:MGI:1341112]
B cells	Trim26	6.48e-09	0.0292666	0.444	0.423	0.000104701	tripartite motif-containing 26 [Source:MGI Symbol;Acc:MGI:1337056]
B cells	Celf1	6.56e-09	-0.225965	0.57	0.669	0.000106013	CUGBP, Elav-like family member 1 [Source:MGI Symbol;Acc:MGI:1342295]
B cells	Mrpl13	6.57e-09	0.0567474	0.25	0.212	0.000106091	mitochondrial ribosomal protein L13 [Source:MGI Symbol;Acc:MGI:2137218]
B cells	Esco1	6.82e-09	0.0282294	0.397	0.38	0.000110268	establishment of sister chromatid cohesion N-acetyltransferase 1 [Source:MGI Symbol;Acc:MGI:1925055]
B cells	Nip7	6.85e-09	0.0463221	0.288	0.268	0.000110721	NIP7, nucleolar pre-rRNA processing protein [Source:MGI Symbol;Acc:MGI:1913414]
B cells	Chd9	6.9e-09	0.0277165	0.355	0.366	0.000111497	chromodomain helicase DNA binding protein 9 [Source:MGI Symbol;Acc:MGI:1924001]
B cells	Atr	7.05e-09	0.0427795	0.269	0.249	0.00011395	ataxia telangiectasia and Rad3 related [Source:MGI Symbol;Acc:MGI:108028]
B cells	Cops4	7.06e-09	0.0352547	0.296	0.287	0.000114033	COP9 signalosome subunit 4 [Source:MGI Symbol;Acc:MGI:1349414]
B cells	Mrpl9	7.09e-09	0.0555272	0.24	0.215	0.000114508	mitochondrial ribosomal protein L9 [Source:MGI Symbol;Acc:MGI:2137211]
B cells	Srpk2	7.17e-09	0.0243323	0.418	0.41	0.000115861	serine/arginine-rich protein specific kinase 2 [Source:MGI Symbol;Acc:MGI:1201408]
B cells	Mrfap1	7.18e-09	0.0210787	0.519	0.503	0.000115943	Morf4 family associated protein 1 [Source:MGI Symbol;Acc:MGI:1914818]
B cells	Il10rb	7.18e-09	0.0276099	0.37	0.354	0.000115943	interleukin 10 receptor, beta [Source:MGI Symbol;Acc:MGI:109380]
B cells	Arhgef6	7.22e-09	0.0325121	0.421	0.417	0.000116714	Rac/Cdc42 guanine nucleotide exchange factor (GEF) 6 [Source:MGI Symbol;Acc:MGI:1920591]
B cells	Mrps18a	7.26e-09	0.0801241	0.211	0.164	0.000117239	mitochondrial ribosomal protein S18A [Source:MGI Symbol;Acc:MGI:1915815]
B cells	Aida	7.34e-09	0.038895	0.289	0.273	0.000118564	axin interactor, dorsalization associated [Source:MGI Symbol;Acc:MGI:1919737]
B cells	Znrd2	7.34e-09	0.0943065	0.207	0.154	0.00011857	zinc ribbon domain containing 2 [Source:MGI Symbol;Acc:MGI:1913482]
B cells	Utrn	7.67e-09	0.0418727	0.304	0.289	0.000123939	utrophin [Source:MGI Symbol;Acc:MGI:104631]
B cells	Ggnbp2	7.88e-09	0.0211117	0.546	0.535	0.000127376	gametogenetin binding protein 2 [Source:MGI Symbol;Acc:MGI:2387356]
B cells	Gabpb2	8.02e-09	0.0262653	0.515	0.509	0.000129665	GA repeat binding protein, beta 2 [Source:MGI Symbol;Acc:MGI:95612]
B cells	Lsg1	8.05e-09	0.0443075	0.26	0.241	0.000129994	large 60S subunit nuclear export GTPase 1 [Source:MGI Symbol;Acc:MGI:107236]
B cells	Oard1	8.07e-09	0.0413195	0.293	0.277	0.000130462	O-acyl-ADP-ribose deacylase 1 [Source:MGI Symbol;Acc:MGI:2146818]
B cells	Hbp1	8.22e-09	0.0433275	0.258	0.235	0.000132869	high mobility group box transcription factor 1 [Source:MGI Symbol;Acc:MGI:894659]
B cells	Dut	8.24e-09	0.0677103	0.226	0.206	0.000133173	deoxyuridine triphosphatase [Source:MGI Symbol;Acc:MGI:1346051]
B cells	Ash1l	8.41e-09	-0.0122247	0.77	0.778	0.000135959	ASH1 like histone lysine methyltransferase [Source:MGI Symbol;Acc:MGI:2183158]
B cells	Uri1	8.52e-09	0.0359485	0.337	0.318	0.000137667	URI1, prefoldin-like chaperone [Source:MGI Symbol;Acc:MGI:1342294]
B cells	Fry	8.57e-09	0.0736869	0.215	0.183	0.000138484	FRY microtubule binding protein [Source:MGI Symbol;Acc:MGI:2443895]
B cells	Hddc2	8.62e-09	0.0938696	0.203	0.154	0.000139254	HD domain containing 2 [Source:MGI Symbol;Acc:MGI:1916942]
B cells	Hsp90aa1	8.66e-09	-0.424036	0.786	0.878	0.000140006	heat shock protein 90, alpha (cytosolic), class A member 1 [Source:MGI Symbol;Acc:MGI:96250]
B cells	Senp6	8.67e-09	0.0282915	0.577	0.563	0.000140128	SUMO/sentrin specific peptidase 6 [Source:MGI Symbol;Acc:MGI:1922075]
B cells	Appl1	8.93e-09	0.0408129	0.295	0.272	0.000144265	adaptor protein, phosphotyrosine interaction, PH domain and leucine zipper containing 1 [Source:MGI Symbol;Acc:MGI:1920243]
B cells	Pcmtd1	8.99e-09	0.0304022	0.541	0.541	0.000145215	protein-L-isoaspartate (D-aspartate) O-methyltransferase domain containing 1 [Source:MGI Symbol;Acc:MGI:2441773]
B cells	Slc38a2	9e-09	0.0166247	0.634	0.629	0.000145367	solute carrier family 38, member 2 [Source:MGI Symbol;Acc:MGI:1915010]
B cells	Dnajb6	9.07e-09	0.0307973	0.48	0.471	0.000146583	DnaJ heat shock protein family (Hsp40) member B6 [Source:MGI Symbol;Acc:MGI:1344381]
B cells	Mfap1a	9.15e-09	0.0388797	0.265	0.244	0.000147787	microfibrillar-associated protein 1A [Source:MGI Symbol;Acc:MGI:1914782]
B cells	Taf15	9.43e-09	0.0157972	0.478	0.473	0.000152392	TATA-box binding protein associated factor 15 [Source:MGI Symbol;Acc:MGI:1917689]
B cells	Slc4a7	9.44e-09	0.0318629	0.414	0.391	0.000152539	solute carrier family 4, sodium bicarbonate cotransporter, member 7 [Source:MGI Symbol;Acc:MGI:2443878]
B cells	Sft2d3	9.47e-09	0.08987	0.206	0.148	0.000153025	SFT2 domain containing 3 [Source:MGI Symbol;Acc:MGI:1914408]
B cells	Eea1	9.67e-09	0.0584067	0.245	0.222	0.000156197	early endosome antigen 1 [Source:MGI Symbol;Acc:MGI:2442192]
B cells	Cd86	9.83e-09	0.0653775	0.228	0.199	0.000158858	CD86 antigen [Source:MGI Symbol;Acc:MGI:101773]
B cells	Imp4	9.98e-09	0.0454698	0.286	0.267	0.000161182	IMP4, U3 small nucleolar ribonucleoprotein [Source:MGI Symbol;Acc:MGI:106572]
B cells	Glmp	1.01e-08	0.0350629	0.327	0.315	0.000163442	glycosylated lysosomal membrane protein [Source:MGI Symbol;Acc:MGI:1913318]
B cells	Taf11	1.01e-08	0.0791967	0.221	0.172	0.000163733	TATA-box binding protein associated factor 11 [Source:MGI Symbol;Acc:MGI:1916026]
B cells	Vps41	1.04e-08	0.0398387	0.263	0.243	0.000167603	VPS41 HOPS complex subunit [Source:MGI Symbol;Acc:MGI:1929215]
B cells	Arhgap15	1.07e-08	-0.0116316	0.648	0.655	0.000172605	Rho GTPase activating protein 15 [Source:MGI Symbol;Acc:MGI:1923367]
B cells	1110059G10Rik	1.08e-08	0.0995268	0.197	0.138	0.000174435	RIKEN cDNA 1110059G10 gene [Source:MGI Symbol;Acc:MGI:1913452]
B cells	Nsf	1.09e-08	0.0330284	0.412	0.413	0.000176213	N-ethylmaleimide sensitive fusion protein [Source:MGI Symbol;Acc:MGI:104560]
B cells	Isca2	1.13e-08	0.0886885	0.218	0.151	0.000183375	iron-sulfur cluster assembly 2 [Source:MGI Symbol;Acc:MGI:1921566]
B cells	Rab7	1.14e-08	0.0328808	0.452	0.44	0.000183821	RAB7, member RAS oncogene family [Source:MGI Symbol;Acc:MGI:105068]
B cells	Washc2	1.14e-08	0.0259205	0.387	0.369	0.000183921	WASH complex subunit 2` [Source:MGI Symbol;Acc:MGI:106463]
B cells	Ccdc115	1.15e-08	0.0645195	0.226	0.188	0.000186107	coiled-coil domain containing 115 [Source:MGI Symbol;Acc:MGI:1916918]
B cells	Ilkap	1.17e-08	0.031433	0.346	0.324	0.000188399	integrin-linked kinase-associated serine/threonine phosphatase 2C [Source:MGI Symbol;Acc:MGI:1914694]
B cells	Cyp4f18	1.17e-08	0.0358081	0.384	0.377	0.000189128	cytochrome P450, family 4, subfamily f, polypeptide 18 [Source:MGI Symbol;Acc:MGI:1919304]
B cells	Slk	1.19e-08	0.0422769	0.257	0.236	0.000192804	STE20-like kinase [Source:MGI Symbol;Acc:MGI:103241]
B cells	Casp4	1.21e-08	0.060753	0.255	0.224	0.000195842	caspase 4, apoptosis-related cysteine peptidase [Source:MGI Symbol;Acc:MGI:107700]
B cells	0610030E20Rik	1.23e-08	0.0267503	0.338	0.329	0.000199122	RIKEN cDNA 0610030E20 gene [Source:MGI Symbol;Acc:MGI:1915614]
B cells	Ddx52	1.25e-08	0.0421869	0.274	0.237	0.000202208	DExD box helicase 52 [Source:MGI Symbol;Acc:MGI:1925644]
B cells	Tmem168	1.25e-08	0.0335105	0.334	0.311	0.000202237	transmembrane protein 168 [Source:MGI Symbol;Acc:MGI:1921794]
B cells	Zbp1	1.26e-08	0.0832841	0.219	0.174	0.000203351	Z-DNA binding protein 1 [Source:MGI Symbol;Acc:MGI:1927449]
B cells	Brms1	1.33e-08	0.102543	0.196	0.135	0.000215068	breast cancer metastasis-suppressor 1 [Source:MGI Symbol;Acc:MGI:2388804]
B cells	Anapc15	1.34e-08	0.0899816	0.205	0.155	0.000216885	anaphase promoting complex C subunit 15 [Source:MGI Symbol;Acc:MGI:1922680]
B cells	Akirin2	1.36e-08	0.0443452	0.26	0.241	0.000219634	akirin 2 [Source:MGI Symbol;Acc:MGI:1889364]
B cells	Fnbp4	1.38e-08	0.0240885	0.421	0.397	0.000223234	formin binding protein 4 [Source:MGI Symbol;Acc:MGI:1860513]
B cells	Syngr2	1.39e-08	0.0174627	0.454	0.446	0.00022399	synaptogyrin 2 [Source:MGI Symbol;Acc:MGI:1328324]
B cells	Ubap2l	1.41e-08	0.0129589	0.692	0.69	0.000227433	ubiquitin-associated protein 2-like [Source:MGI Symbol;Acc:MGI:1921633]
B cells	Anxa2	1.41e-08	0.138976	0.169	0.137	0.000227934	annexin A2 [Source:MGI Symbol;Acc:MGI:88246]
B cells	Map2k1	1.45e-08	0.0322213	0.321	0.3	0.000234106	mitogen-activated protein kinase kinase 1 [Source:MGI Symbol;Acc:MGI:1346866]
B cells	Fbxw7	1.46e-08	0.0304644	0.327	0.31	0.000235144	F-box and WD-40 domain protein 7 [Source:MGI Symbol;Acc:MGI:1354695]
B cells	Ddx23	1.47e-08	0.0310406	0.322	0.297	0.000237497	DEAD box helicase 23 [Source:MGI Symbol;Acc:MGI:1921601]
B cells	Sart1	1.49e-08	0.0294236	0.298	0.286	0.000241062	squamous cell carcinoma antigen recognized by T cells 1 [Source:MGI Symbol;Acc:MGI:1309453]
B cells	Eif2ak1	1.58e-08	0.0402737	0.261	0.244	0.000254781	eukaryotic translation initiation factor 2 alpha kinase 1 [Source:MGI Symbol;Acc:MGI:1353448]
B cells	Dhx8	1.61e-08	0.0557702	0.247	0.214	0.000259999	DEAH (Asp-Glu-Ala-His) box polypeptide 8 [Source:MGI Symbol;Acc:MGI:1306823]
B cells	Ing4	1.66e-08	0.0391754	0.275	0.249	0.000268953	inhibitor of growth family, member 4 [Source:MGI Symbol;Acc:MGI:107307]
B cells	Trp53	1.67e-08	0.026207	0.508	0.516	0.000270467	transformation related protein 53 [Source:MGI Symbol;Acc:MGI:98834]
B cells	Mrps18b	1.68e-08	0.0860336	0.207	0.16	0.000271863	mitochondrial ribosomal protein S18B [Source:MGI Symbol;Acc:MGI:1914223]
B cells	Tmem223	1.69e-08	0.0632708	0.222	0.185	0.000273414	transmembrane protein 223 [Source:MGI Symbol;Acc:MGI:1914086]
B cells	Cebpzos	1.7e-08	0.095673	0.202	0.147	0.000273895	CCAAT/enhancer binding protein (C/EBP), zeta, opposite strand [Source:MGI Symbol;Acc:MGI:1915804]
B cells	Me2	1.74e-08	0.0428162	0.288	0.259	0.000281686	malic enzyme 2, NAD(+)-dependent, mitochondrial [Source:MGI Symbol;Acc:MGI:2147351]
B cells	Derl2	1.79e-08	0.0332918	0.283	0.269	0.000288812	Der1-like domain family, member 2 [Source:MGI Symbol;Acc:MGI:2151483]
B cells	Mrpl40	1.79e-08	0.10086	0.199	0.138	0.000289539	mitochondrial ribosomal protein L40 [Source:MGI Symbol;Acc:MGI:1332635]
B cells	Vgll4	1.87e-08	0.0338057	0.303	0.283	0.000302243	vestigial like family member 4 [Source:MGI Symbol;Acc:MGI:2652840]
B cells	Cyth4	1.88e-08	0.0301151	0.457	0.455	0.000304288	cytohesin 4 [Source:MGI Symbol;Acc:MGI:2441702]
B cells	Pdlim2	1.89e-08	0.0269431	0.311	0.309	0.000305055	PDZ and LIM domain 2 [Source:MGI Symbol;Acc:MGI:2384850]
B cells	Zmiz2	1.9e-08	0.0277426	0.476	0.461	0.000307535	zinc finger, MIZ-type containing 2 [Source:MGI Symbol;Acc:MGI:106374]
B cells	Hspa4	1.93e-08	0.0183597	0.57	0.574	0.00031246	heat shock protein 4 [Source:MGI Symbol;Acc:MGI:1342292]
B cells	Psmd1	1.97e-08	0.0394429	0.282	0.261	0.000318394	proteasome (prosome, macropain) 26S subunit, non-ATPase, 1 [Source:MGI Symbol;Acc:MGI:1917497]
B cells	Babam1	1.98e-08	0.0567443	0.24	0.202	0.000320148	BRISC and BRCA1 A complex member 1 [Source:MGI Symbol;Acc:MGI:1915501]
B cells	Sar1a	1.98e-08	0.0307655	0.34	0.318	0.000320292	secretion associated Ras related GTPase 1A [Source:MGI Symbol;Acc:MGI:98230]
B cells	Trim24	2e-08	0.0387069	0.279	0.262	0.000322898	tripartite motif-containing 24 [Source:MGI Symbol;Acc:MGI:109275]
B cells	Sinhcaf	2.02e-08	0.0594551	0.221	0.196	0.000326588	SIN3-HDAC complex associated factor [Source:MGI Symbol;Acc:MGI:1929091]
B cells	Chmp1a	2.05e-08	0.0397189	0.269	0.244	0.000331988	charged multivesicular body protein 1A [Source:MGI Symbol;Acc:MGI:1920159]
B cells	Auh	2.09e-08	0.0762633	0.21	0.164	0.000337792	AU RNA binding protein/enoyl-coenzyme A hydratase [Source:MGI Symbol;Acc:MGI:1338011]
B cells	Retreg1	2.11e-08	0.0332215	0.349	0.331	0.000340584	reticulophagy regulator 1 [Source:MGI Symbol;Acc:MGI:1913520]
B cells	C1galt1	2.16e-08	0.0373956	0.389	0.379	0.000348916	core 1 synthase, glycoprotein-N-acetylgalactosamine 3-beta-galactosyltransferase, 1 [Source:MGI Symbol;Acc:MGI:2151071]
B cells	Raly	2.18e-08	0.0339323	0.446	0.438	0.000352378	hnRNP-associated with lethal yellow [Source:MGI Symbol;Acc:MGI:97850]
B cells	Naxd	2.18e-08	0.0387857	0.258	0.234	0.000352472	NAD(P)HX dehydratase [Source:MGI Symbol;Acc:MGI:1913353]
B cells	Suco	2.18e-08	0.0308843	0.316	0.308	0.000352728	SUN domain containing ossification factor [Source:MGI Symbol;Acc:MGI:2138346]
B cells	Gtf3a	2.18e-08	0.0434769	0.248	0.213	0.000352793	general transcription factor III A [Source:MGI Symbol;Acc:MGI:1913846]
B cells	Mier1	2.19e-08	0.0132466	0.629	0.643	0.000353533	MEIR1 treanscription regulator [Source:MGI Symbol;Acc:MGI:1918398]
B cells	Fbxw2	2.2e-08	0.0234551	0.397	0.388	0.000355126	F-box and WD-40 domain protein 2 [Source:MGI Symbol;Acc:MGI:1353435]
B cells	Pip5k1c	2.24e-08	0.0465359	0.248	0.217	0.000361904	phosphatidylinositol-4-phosphate 5-kinase, type 1 gamma [Source:MGI Symbol;Acc:MGI:1298224]
B cells	Arfgap2	2.26e-08	0.0347407	0.281	0.261	0.0003649	ADP-ribosylation factor GTPase activating protein 2 [Source:MGI Symbol;Acc:MGI:1924288]
B cells	Sp3os	2.26e-08	0.0674762	0.217	0.179	0.00036514	trans-acting transcription factor 3, opposite strand [Source:MGI Symbol;Acc:MGI:1914936]
B cells	Gars	2.32e-08	0.0597157	0.228	0.194	0.000374475	glycyl-tRNA synthetase [Source:MGI Symbol;Acc:MGI:2449057]
B cells	Ptpra	2.35e-08	0.0324879	0.363	0.348	0.000380371	protein tyrosine phosphatase, receptor type, A [Source:MGI Symbol;Acc:MGI:97808]
B cells	Smim27	2.4e-08	0.049544	0.243	0.224	0.000387129	small integral membrane protein 27 [Source:MGI Symbol;Acc:MGI:1913684]
B cells	Rrp15	2.46e-08	0.106339	0.193	0.139	0.000397422	ribosomal RNA processing 15 homolog [Source:MGI Symbol;Acc:MGI:1914473]
B cells	Def6	2.51e-08	0.0445698	0.252	0.22	0.000405099	differentially expressed in FDCP 6 [Source:MGI Symbol;Acc:MGI:1346328]
B cells	Nabp2	2.54e-08	0.0542509	0.227	0.201	0.000410282	nucleic acid binding protein 2 [Source:MGI Symbol;Acc:MGI:1917167]
B cells	Washc3	2.56e-08	0.0483292	0.236	0.207	0.000414119	WASH complex subunit 3 [Source:MGI Symbol;Acc:MGI:1914532]
B cells	Aup1	2.61e-08	0.0332784	0.41	0.38	0.000421845	ancient ubiquitous protein 1 [Source:MGI Symbol;Acc:MGI:107789]
B cells	Trip11	2.62e-08	0.0231969	0.46	0.454	0.000423848	thyroid hormone receptor interactor 11 [Source:MGI Symbol;Acc:MGI:1924393]
B cells	Bola1	2.66e-08	0.114426	0.189	0.122	0.000429372	bolA-like 1 (E. coli) [Source:MGI Symbol;Acc:MGI:1916418]
B cells	Ankrd49	2.77e-08	0.0396062	0.262	0.239	0.0004478	ankyrin repeat domain 49 [Source:MGI Symbol;Acc:MGI:1930842]
B cells	Ccdc9	2.79e-08	0.0804669	0.205	0.159	0.000450506	coiled-coil domain containing 9 [Source:MGI Symbol;Acc:MGI:1921443]
B cells	Pum3	2.89e-08	0.0371517	0.307	0.291	0.000467584	pumilio RNA-binding family member 3 [Source:MGI Symbol;Acc:MGI:106253]
B cells	Bcl7b	2.92e-08	0.035366	0.283	0.262	0.00047223	B cell CLL/lymphoma 7B [Source:MGI Symbol;Acc:MGI:1332238]
B cells	Synrg	3.05e-08	0.0316683	0.319	0.299	0.000493148	synergin, gamma [Source:MGI Symbol;Acc:MGI:1354742]
B cells	Fam107b	3.09e-08	0.0319296	0.422	0.418	0.00049928	family with sequence similarity 107, member B [Source:MGI Symbol;Acc:MGI:1913790]
B cells	Ube2e1	3.09e-08	0.0279765	0.308	0.302	0.000499597	ubiquitin-conjugating enzyme E2E 1 [Source:MGI Symbol;Acc:MGI:107411]
B cells	Hnrnpab	3.1e-08	0.0156158	0.593	0.616	0.00050029	heterogeneous nuclear ribonucleoprotein A/B [Source:MGI Symbol;Acc:MGI:1330294]
B cells	5430405H02Rik	3.11e-08	0.0534693	0.223	0.191	0.00050287	RIKEN cDNA 5430405H02 gene [Source:MGI Symbol;Acc:MGI:1921737]
B cells	Kmt2a	3.18e-08	-0.0323162	0.813	0.831	0.00051398	lysine (K)-specific methyltransferase 2A [Source:MGI Symbol;Acc:MGI:96995]
B cells	Vps13c	3.22e-08	0.045131	0.244	0.226	0.000519739	vacuolar protein sorting 13C [Source:MGI Symbol;Acc:MGI:2444207]
[truncated: 526 more rows]

## Sheet: CD4+ MemoryT_markers
cluster_id	gene	p_val	avg_log2FC	pct.1	pct.2	p_val_adj	description
CD4+ memory T	Ubb	1.02896e-148	1.10137	0.879	0.787	1.66259e-144	ubiquitin B [Source:MGI Symbol;Acc:MGI:98888]
CD4+ memory T	Hsp90aa1	1.74777e-99	-0.468978	0.646	0.775	2.82405e-95	heat shock protein 90, alpha (cytosolic), class A member 1 [Source:MGI Symbol;Acc:MGI:96250]
CD4+ memory T	Ighm	2.60915e-98	-0.610569	0.854	0.948	4.21586e-94	immunoglobulin heavy constant mu [Source:MGI Symbol;Acc:MGI:96448]
CD4+ memory T	mt-Co1	8.86165e-98	-0.299368	0.999	1	1.43186e-93	mitochondrially encoded cytochrome c oxidase I [Source:MGI Symbol;Acc:MGI:102504]
CD4+ memory T	mt-Nd4	1.18967e-95	-0.27733	0.992	0.996	1.92228e-91	mitochondrially encoded NADH dehydrogenase 4 [Source:MGI Symbol;Acc:MGI:102498]
CD4+ memory T	Uba52	7.97101e-95	0.998762	0.857	0.756	1.28796e-90	ubiquitin A-52 residue ribosomal protein fusion product 1 [Source:MGI Symbol;Acc:MGI:98887]
CD4+ memory T	Dnaja1	7.05295e-94	-0.37284	0.675	0.79	1.13962e-89	DnaJ heat shock protein family (Hsp40) member A1 [Source:MGI Symbol;Acc:MGI:1270129]
CD4+ memory T	Igkc	3.46128e-82	-0.460296	0.949	0.974	5.59273e-78	immunoglobulin kappa constant [Source:MGI Symbol;Acc:MGI:96495]
CD4+ memory T	mt-Co2	4.52515e-78	-0.242582	0.997	1	7.31173e-74	mitochondrially encoded cytochrome c oxidase II [Source:MGI Symbol;Acc:MGI:102503]
CD4+ memory T	Hnrnph1	5.06517e-77	-0.298176	0.595	0.722	8.1843e-73	heterogeneous nuclear ribonucleoprotein H1 [Source:MGI Symbol;Acc:MGI:1891925]
CD4+ memory T	Eif4a2	1.32718e-71	-0.278648	0.592	0.695	2.14446e-67	eukaryotic translation initiation factor 4A2 [Source:MGI Symbol;Acc:MGI:106906]
CD4+ memory T	AY036118	7.99744e-69	0.719389	0.763	0.549	1.29223e-64	NA
CD4+ memory T	Mat2a	8.45137e-69	-0.342323	0.439	0.56	1.36557e-64	methionine adenosyltransferase II, alpha [Source:MGI Symbol;Acc:MGI:2443731]
CD4+ memory T	Hsph1	4.27797e-68	-0.407112	0.151	0.37	6.91235e-64	heat shock 105kDa/110kDa protein 1 [Source:MGI Symbol;Acc:MGI:105053]
CD4+ memory T	Cd19	1.04979e-67	-0.394057	0.164	0.373	1.69625e-63	CD19 antigen [Source:MGI Symbol;Acc:MGI:88319]
CD4+ memory T	Hspa8	6.80391e-67	-0.310177	0.877	0.93	1.09938e-62	heat shock protein 8 [Source:MGI Symbol;Acc:MGI:105384]
CD4+ memory T	Rsrp1	4.43461e-66	-0.214022	0.832	0.88	7.16544e-62	arginine/serine rich protein 1 [Source:MGI Symbol;Acc:MGI:106498]
CD4+ memory T	Gm26917	2.85525e-59	-0.377728	0.508	0.63	4.61351e-55	NA
CD4+ memory T	Ogt	2.72149e-58	-0.168916	0.811	0.854	4.39739e-54	O-linked N-acetylglucosamine (GlcNAc) transferase (UDP-N-acetylglucosamine:polypeptide-N-acetylglucosaminyl transferase) [Source:MGI Symbol;Acc:MGI:1339639]
CD4+ memory T	Rbm3	6.32269e-55	0.717949	0.799	0.656	1.02162e-50	RNA binding motif (RNP1, RRM) protein 3 [Source:MGI Symbol;Acc:MGI:1099460]
CD4+ memory T	Etnk1	8.06433e-55	-0.254293	0.511	0.608	1.30304e-50	ethanolamine kinase 1 [Source:MGI Symbol;Acc:MGI:1922570]
CD4+ memory T	Ppib	3.52648e-53	0.592676	0.698	0.461	5.69809e-49	peptidylprolyl isomerase B [Source:MGI Symbol;Acc:MGI:97750]
CD4+ memory T	mt-Co3	1.46563e-52	-0.133965	0.999	1	2.36817e-48	mitochondrially encoded cytochrome c oxidase III [Source:MGI Symbol;Acc:MGI:102502]
CD4+ memory T	Celf1	1.70968e-51	-0.234326	0.483	0.586	2.76251e-47	CUGBP, Elav-like family member 1 [Source:MGI Symbol;Acc:MGI:1342295]
CD4+ memory T	mt-Atp6	4.75012e-50	-0.128091	0.998	1	7.67524e-46	mitochondrially encoded ATP synthase 6 [Source:MGI Symbol;Acc:MGI:99927]
CD4+ memory T	mt-Cytb	6.01769e-50	-0.113284	0.995	0.999	9.72338e-46	mitochondrially encoded cytochrome b [Source:MGI Symbol;Acc:MGI:102501]
CD4+ memory T	Cd74	7.19298e-50	-0.715573	0.667	0.742	1.16224e-45	CD74 antigen (invariant polypeptide of major histocompatibility complex, class II antigen-associated) [Source:MGI Symbol;Acc:MGI:96534]
CD4+ memory T	Phip	4.82875e-49	-0.206355	0.634	0.697	7.8023e-45	pleckstrin homology domain interacting protein [Source:MGI Symbol;Acc:MGI:1932404]
CD4+ memory T	Cd79a	2.08055e-47	-0.620701	0.165	0.34	3.36175e-43	CD79A antigen (immunoglobulin-associated alpha) [Source:MGI Symbol;Acc:MGI:101774]
CD4+ memory T	Sfpq	1.68202e-46	-0.190196	0.691	0.746	2.71781e-42	splicing factor proline/glutamine rich (polypyrimidine tract binding protein associated) [Source:MGI Symbol;Acc:MGI:1918764]
CD4+ memory T	Itgal	2.81007e-45	-0.196494	0.723	0.782	4.54051e-41	integrin alpha L [Source:MGI Symbol;Acc:MGI:96606]
CD4+ memory T	Tardbp	5.73851e-45	-0.203577	0.499	0.599	9.27228e-41	TAR DNA binding protein [Source:MGI Symbol;Acc:MGI:2387629]
CD4+ memory T	Eif4g2	8.81242e-45	-0.177205	0.738	0.782	1.42391e-40	eukaryotic translation initiation factor 4, gamma 2 [Source:MGI Symbol;Acc:MGI:109207]
CD4+ memory T	BC005537	1.53015e-44	-0.199533	0.556	0.635	2.47242e-40	cDNA sequence BC005537 [Source:MGI Symbol;Acc:MGI:2441726]
CD4+ memory T	Arid1a	3.52454e-44	-0.198525	0.545	0.626	5.69495e-40	AT rich interactive domain 1A (SWI-like) [Source:MGI Symbol;Acc:MGI:1935147]
CD4+ memory T	S100a11	3.98079e-44	0.678938	0.783	0.639	6.43217e-40	S100 calcium binding protein A11 [Source:MGI Symbol;Acc:MGI:1338798]
CD4+ memory T	Chordc1	4.14946e-44	-0.227587	0.322	0.437	6.7047e-40	cysteine and histidine-rich domain (CHORD)-containing, zinc-binding protein 1 [Source:MGI Symbol;Acc:MGI:1914167]
CD4+ memory T	Ddx17	3.85437e-43	-0.183539	0.631	0.701	6.22789e-39	DEAD box helicase 17 [Source:MGI Symbol;Acc:MGI:1914290]
CD4+ memory T	Gm42418	9.99828e-43	-0.259287	0.999	1	1.61552e-38	NA
CD4+ memory T	Cd79b	1.24423e-42	-0.545707	0.219	0.331	2.01043e-38	CD79B antigen [Source:MGI Symbol;Acc:MGI:96431]
CD4+ memory T	Grk2	1.28228e-42	-0.186246	0.562	0.644	2.07191e-38	G protein-coupled receptor kinase 2 [Source:MGI Symbol;Acc:MGI:87940]
CD4+ memory T	Wnk1	2.56786e-42	-0.168633	0.681	0.741	4.14914e-38	WNK lysine deficient protein kinase 1 [Source:MGI Symbol;Acc:MGI:2442092]
CD4+ memory T	Ikzf1	3.34215e-42	-0.208596	0.508	0.588	5.40025e-38	IKAROS family zinc finger 1 [Source:MGI Symbol;Acc:MGI:1342540]
CD4+ memory T	Stk17b	8.60061e-42	-0.179418	0.725	0.763	1.38969e-37	serine/threonine kinase 17b (apoptosis-inducing) [Source:MGI Symbol;Acc:MGI:2138162]
CD4+ memory T	Zfp207	2.01779e-41	-0.181569	0.525	0.6	3.26035e-37	zinc finger protein 207 [Source:MGI Symbol;Acc:MGI:1340045]
CD4+ memory T	Nfkb1	3.26546e-41	-0.192675	0.683	0.717	5.27633e-37	nuclear factor of kappa light polypeptide gene enhancer in B cells 1, p105 [Source:MGI Symbol;Acc:MGI:97312]
CD4+ memory T	Rpl10	3.97908e-41	0.749888	0.93	0.882	6.4294e-37	ribosomal protein L10 [Source:MGI Symbol;Acc:MGI:105943]
CD4+ memory T	Hnrnpa2b1	4.05302e-41	-0.0961594	0.926	0.943	6.54887e-37	heterogeneous nuclear ribonucleoprotein A2/B1 [Source:MGI Symbol;Acc:MGI:104819]
CD4+ memory T	Emp3	4.29315e-41	0.612597	0.672	0.512	6.93687e-37	epithelial membrane protein 3 [Source:MGI Symbol;Acc:MGI:1098729]
CD4+ memory T	Psap	4.89442e-41	-0.239218	0.58	0.649	7.9084e-37	prosaposin [Source:MGI Symbol;Acc:MGI:97783]
CD4+ memory T	Elob	5.23634e-41	0.570516	0.717	0.537	8.46089e-37	elongin B [Source:MGI Symbol;Acc:MGI:1914923]
CD4+ memory T	Iglc2	6.05917e-41	-0.397173	0.223	0.353	9.79041e-37	immunoglobulin lambda constant 2 [Source:MGI Symbol;Acc:MGI:99547]
CD4+ memory T	Laptm5	1.64303e-40	-0.11411	0.92	0.943	2.65481e-36	lysosomal-associated protein transmembrane 5 [Source:MGI Symbol;Acc:MGI:108046]
CD4+ memory T	Atf7ip	2.50032e-40	-0.17664	0.574	0.632	4.04002e-36	activating transcription factor 7 interacting protein [Source:MGI Symbol;Acc:MGI:1858965]
CD4+ memory T	Cd52	9.22397e-40	0.800513	0.944	0.889	1.49041e-35	CD52 antigen [Source:MGI Symbol;Acc:MGI:1346088]
CD4+ memory T	Ftl1	1.3392e-39	0.643067	0.803	0.674	2.16388e-35	ferritin light polypeptide 1 [Source:MGI Symbol;Acc:MGI:95589]
CD4+ memory T	Nfatc1	1.35041e-39	-0.228168	0.549	0.618	2.182e-35	nuclear factor of activated T cells, cytoplasmic, calcineurin dependent 1 [Source:MGI Symbol;Acc:MGI:102469]
CD4+ memory T	Man1a	1.39717e-39	-0.252235	0.377	0.453	2.25755e-35	mannosidase 1, alpha [Source:MGI Symbol;Acc:MGI:104677]
CD4+ memory T	H2-Aa	3.62493e-39	-0.524067	0.377	0.482	5.85716e-35	histocompatibility 2, class II antigen A, alpha [Source:MGI Symbol;Acc:MGI:95895]
CD4+ memory T	Hspd1	4.38842e-39	-0.246734	0.373	0.482	7.09081e-35	heat shock protein 1 (chaperonin) [Source:MGI Symbol;Acc:MGI:96242]
CD4+ memory T	Zfp36l1	6.05879e-39	-0.215965	0.714	0.744	9.78979e-35	zinc finger protein 36, C3H type-like 1 [Source:MGI Symbol;Acc:MGI:107946]
CD4+ memory T	Serp1	1.78081e-38	-0.246656	0.349	0.443	2.87744e-34	stress-associated endoplasmic reticulum protein 1 [Source:MGI Symbol;Acc:MGI:92638]
CD4+ memory T	Xiap	1.92312e-38	-0.189651	0.417	0.508	3.10737e-34	X-linked inhibitor of apoptosis [Source:MGI Symbol;Acc:MGI:107572]
CD4+ memory T	Cnot6l	4.60932e-38	-0.159497	0.558	0.613	7.44773e-34	CCR4-NOT transcription complex, subunit 6-like [Source:MGI Symbol;Acc:MGI:2443154]
CD4+ memory T	Lgals1	7.4321e-38	0.757318	0.515	0.359	1.20088e-33	lectin, galactose binding, soluble 1 [Source:MGI Symbol;Acc:MGI:96777]
CD4+ memory T	Snrnp70	1.00804e-37	-0.138348	0.757	0.796	1.62878e-33	small nuclear ribonucleoprotein 70 (U1) [Source:MGI Symbol;Acc:MGI:98341]
CD4+ memory T	Pde7a	1.22538e-37	-0.206855	0.34	0.447	1.97997e-33	phosphodiesterase 7A [Source:MGI Symbol;Acc:MGI:1202402]
CD4+ memory T	Ighd	1.37941e-37	-0.416323	0.201	0.331	2.22885e-33	immunoglobulin heavy constant delta [Source:MGI Symbol;Acc:MGI:96447]
CD4+ memory T	Pou2f2	1.51382e-37	-0.212394	0.681	0.742	2.44603e-33	POU domain, class 2, transcription factor 2 [Source:MGI Symbol;Acc:MGI:101897]
CD4+ memory T	H2-Ab1	2.34995e-37	-0.461634	0.376	0.482	3.79705e-33	histocompatibility 2, class II antigen A, beta 1 [Source:MGI Symbol;Acc:MGI:103070]
CD4+ memory T	Psmb8	3.68812e-37	0.584374	0.773	0.657	5.95926e-33	proteasome (prosome, macropain) subunit, beta type 8 (large multifunctional peptidase 7) [Source:MGI Symbol;Acc:MGI:1346527]
CD4+ memory T	Sod1	6.28847e-37	-0.184867	0.45	0.549	1.01609e-32	superoxide dismutase 1, soluble [Source:MGI Symbol;Acc:MGI:98351]
CD4+ memory T	Srsf1	8.8994e-37	-0.167813	0.482	0.556	1.43797e-32	serine and arginine-rich splicing factor 1 [Source:MGI Symbol;Acc:MGI:98283]
CD4+ memory T	H3f3b	1.70487e-36	0.623841	0.904	0.848	2.75473e-32	H3.3 histone B [Source:MGI Symbol;Acc:MGI:1101768]
CD4+ memory T	Rpl15	2.17e-36	0.728286	0.906	0.868	3.50628e-32	ribosomal protein L15 [Source:MGI Symbol;Acc:MGI:1913730]
CD4+ memory T	Clec2d	2.42898e-36	-0.114331	0.779	0.802	3.92475e-32	C-type lectin domain family 2, member d [Source:MGI Symbol;Acc:MGI:2135589]
CD4+ memory T	mt-Nd2	2.9022e-36	-0.0628652	0.981	0.986	4.68938e-32	mitochondrially encoded NADH dehydrogenase 2 [Source:MGI Symbol;Acc:MGI:102500]
CD4+ memory T	Ralgps2	3.02738e-36	-0.311909	0.247	0.344	4.89164e-32	Ral GEF with PH domain and SH3 binding motif 2 [Source:MGI Symbol;Acc:MGI:1925505]
CD4+ memory T	Tra2a	3.44057e-36	-0.147938	0.565	0.619	5.55928e-32	transformer 2 alpha [Source:MGI Symbol;Acc:MGI:1933972]
CD4+ memory T	Foxp1	8.00446e-36	-0.210731	0.573	0.619	1.29336e-31	forkhead box P1 [Source:MGI Symbol;Acc:MGI:1914004]
CD4+ memory T	Pabpc1	8.14857e-36	-0.13287	0.891	0.9	1.31665e-31	poly(A) binding protein, cytoplasmic 1 [Source:MGI Symbol;Acc:MGI:1349722]
CD4+ memory T	mt-Nd4l	1.10479e-35	-0.150672	0.666	0.716	1.78512e-31	mitochondrially encoded NADH dehydrogenase 4L [Source:MGI Symbol;Acc:MGI:102497]
CD4+ memory T	Setd1b	1.56828e-35	-0.19468	0.269	0.382	2.53403e-31	SET domain containing 1B [Source:MGI Symbol;Acc:MGI:2652820]
CD4+ memory T	Tmsb10	1.5828e-35	0.767918	0.96	0.954	2.55749e-31	thymosin, beta 10 [Source:MGI Symbol;Acc:MGI:109146]
CD4+ memory T	Lbh	2.30033e-35	-0.133815	0.694	0.726	3.71687e-31	limb-bud and heart [Source:MGI Symbol;Acc:MGI:1925139]
CD4+ memory T	Ube2d3	2.78409e-35	-0.112195	0.845	0.853	4.49854e-31	ubiquitin-conjugating enzyme E2D 3 [Source:MGI Symbol;Acc:MGI:1913355]
CD4+ memory T	Peli1	3.44086e-35	-0.154814	0.59	0.65	5.55975e-31	pellino 1 [Source:MGI Symbol;Acc:MGI:1914495]
CD4+ memory T	Wipf1	9.57231e-35	-0.154963	0.538	0.606	1.54669e-30	WAS/WASL interacting protein family, member 1 [Source:MGI Symbol;Acc:MGI:2178801]
CD4+ memory T	Krit1	1.24299e-34	-0.166837	0.542	0.601	2.00842e-30	KRIT1, ankyrin repeat containing [Source:MGI Symbol;Acc:MGI:1930618]
CD4+ memory T	Ptbp3	1.80468e-34	-0.129186	0.687	0.718	2.916e-30	polypyrimidine tract binding protein 3 [Source:MGI Symbol;Acc:MGI:1923334]
CD4+ memory T	Cyba	1.83776e-34	0.559101	0.785	0.631	2.96946e-30	cytochrome b-245, alpha polypeptide [Source:MGI Symbol;Acc:MGI:1316658]
CD4+ memory T	Eif3a	2.10337e-34	-0.149953	0.692	0.753	3.39863e-30	eukaryotic translation initiation factor 3, subunit A [Source:MGI Symbol;Acc:MGI:95301]
CD4+ memory T	Zbtb20	4.28637e-34	-0.220339	0.513	0.572	6.92592e-30	zinc finger and BTB domain containing 20 [Source:MGI Symbol;Acc:MGI:1929213]
CD4+ memory T	Numa1	3.92705e-33	-0.133754	0.511	0.585	6.34532e-29	nuclear mitotic apparatus protein 1 [Source:MGI Symbol;Acc:MGI:2443665]
CD4+ memory T	Ms4a1	5.27878e-33	-0.570698	0.128	0.264	8.52945e-29	membrane-spanning 4-domains, subfamily A, member 1 [Source:MGI Symbol;Acc:MGI:88321]
CD4+ memory T	Rassf5	6.86044e-33	-0.147261	0.551	0.604	1.10851e-28	Ras association (RalGDS/AF-6) domain family member 5 [Source:MGI Symbol;Acc:MGI:1926375]
CD4+ memory T	Arhgap30	1.21467e-32	-0.128479	0.708	0.742	1.96267e-28	Rho GTPase activating protein 30 [Source:MGI Symbol;Acc:MGI:2684948]
CD4+ memory T	Rps11	1.26008e-32	0.709003	0.96	0.945	2.03604e-28	ribosomal protein S11 [Source:MGI Symbol;Acc:MGI:1351329]
CD4+ memory T	Ifi27l2a	2.46929e-32	0.800062	0.818	0.701	3.98988e-28	interferon, alpha-inducible protein 27 like 2A [Source:MGI Symbol;Acc:MGI:1924183]
CD4+ memory T	Sipa1	8.15e-32	-0.185213	0.349	0.438	1.31688e-27	signal-induced proliferation associated gene 1 [Source:MGI Symbol;Acc:MGI:107576]
CD4+ memory T	Tspo	9.69427e-32	0.485632	0.689	0.516	1.5664e-27	translocator protein [Source:MGI Symbol;Acc:MGI:88222]
CD4+ memory T	AU020206	1.28725e-31	-0.153848	0.661	0.718	2.07994e-27	expressed sequence AU020206 [Source:MGI Symbol;Acc:MGI:2142134]
CD4+ memory T	Ptpn6	1.60497e-31	-0.178447	0.43	0.508	2.59331e-27	protein tyrosine phosphatase, non-receptor type 6 [Source:MGI Symbol;Acc:MGI:96055]
CD4+ memory T	Pcbp1	1.79097e-31	-0.176792	0.48	0.549	2.89385e-27	poly(rC) binding protein 1 [Source:MGI Symbol;Acc:MGI:1345635]
CD4+ memory T	Hsp90ab1	1.87003e-31	-0.141196	0.924	0.949	3.0216e-27	heat shock protein 90 alpha (cytosolic), class B member 1 [Source:MGI Symbol;Acc:MGI:96247]
CD4+ memory T	Celf2	1.93294e-31	-0.122146	0.777	0.789	3.12324e-27	CUGBP, Elav-like family member 2 [Source:MGI Symbol;Acc:MGI:1338822]
CD4+ memory T	Stip1	2.04995e-31	-0.196914	0.216	0.339	3.31232e-27	stress-induced phosphoprotein 1 [Source:MGI Symbol;Acc:MGI:109130]
CD4+ memory T	Nfat5	2.22874e-31	-0.152601	0.472	0.538	3.6012e-27	nuclear factor of activated T cells 5 [Source:MGI Symbol;Acc:MGI:1859333]
CD4+ memory T	Nme2	2.84839e-31	0.597191	0.668	0.498	4.60243e-27	NME/NM23 nucleoside diphosphate kinase 2 [Source:MGI Symbol;Acc:MGI:97356]
CD4+ memory T	Ube3a	5.24322e-31	-0.140005	0.513	0.577	8.47199e-27	ubiquitin protein ligase E3A [Source:MGI Symbol;Acc:MGI:105098]
CD4+ memory T	Dazap2	9.1344e-31	-0.148169	0.507	0.568	1.47594e-26	DAZ associated protein 2 [Source:MGI Symbol;Acc:MGI:1344344]
CD4+ memory T	Mob1a	1.226e-30	-0.141414	0.505	0.562	1.98098e-26	MOB kinase activator 1A [Source:MGI Symbol;Acc:MGI:2442631]
CD4+ memory T	Ddx3x	1.5089e-30	-0.1603	0.428	0.508	2.43808e-26	DEAD box helicase 3, X-linked [Source:MGI Symbol;Acc:MGI:103064]
CD4+ memory T	Clic1	1.76286e-30	0.505993	0.764	0.625	2.84843e-26	chloride intracellular channel 1 [Source:MGI Symbol;Acc:MGI:2148924]
CD4+ memory T	Ppia	2.83436e-30	0.669415	0.926	0.892	4.57976e-26	peptidylprolyl isomerase A [Source:MGI Symbol;Acc:MGI:97749]
CD4+ memory T	Mkln1	1.78022e-29	-0.150877	0.414	0.48	2.87648e-25	muskelin 1, intracellular mediator containing kelch motifs [Source:MGI Symbol;Acc:MGI:1351638]
CD4+ memory T	Ccnd2	2.00118e-29	-0.202817	0.694	0.755	3.23351e-25	cyclin D2 [Source:MGI Symbol;Acc:MGI:88314]
CD4+ memory T	Dnajb1	2.23962e-29	-0.228309	0.163	0.287	3.61878e-25	DnaJ heat shock protein family (Hsp40) member B1 [Source:MGI Symbol;Acc:MGI:1931874]
CD4+ memory T	S100a10	2.40248e-29	0.682233	0.831	0.741	3.88192e-25	S100 calcium binding protein A10 (calpactin) [Source:MGI Symbol;Acc:MGI:1339468]
CD4+ memory T	Hbb-bt	2.89753e-29	0.701972	0.382	0.019	4.68183e-25	hemoglobin, beta adult t chain [Source:MGI Symbol;Acc:MGI:5474850]
CD4+ memory T	Rps18	3.86785e-29	0.709424	0.943	0.935	6.24967e-25	ribosomal protein S18 [Source:MGI Symbol;Acc:MGI:98146]
CD4+ memory T	Bptf	4.19762e-29	-0.091905	0.665	0.692	6.78252e-25	bromodomain PHD finger transcription factor [Source:MGI Symbol;Acc:MGI:2444008]
CD4+ memory T	Nisch	8.20735e-29	-0.117763	0.516	0.583	1.32614e-24	nischarin [Source:MGI Symbol;Acc:MGI:1928323]
CD4+ memory T	Ep300	9.59861e-29	-0.140819	0.449	0.497	1.55094e-24	E1A binding protein p300 [Source:MGI Symbol;Acc:MGI:1276116]
CD4+ memory T	Map4k2	1.49562e-28	-0.155338	0.347	0.427	2.41662e-24	mitogen-activated protein kinase kinase kinase kinase 2 [Source:MGI Symbol;Acc:MGI:1346883]
CD4+ memory T	Git2	1.66199e-28	-0.129302	0.583	0.633	2.68544e-24	GIT ArfGAP 2 [Source:MGI Symbol;Acc:MGI:1347053]
CD4+ memory T	Rpl11	3.48736e-28	0.673522	0.958	0.932	5.63487e-24	ribosomal protein L11 [Source:MGI Symbol;Acc:MGI:1914275]
CD4+ memory T	Tle3	3.54137e-28	-0.156414	0.391	0.469	5.72215e-24	transducin-like enhancer of split 3 [Source:MGI Symbol;Acc:MGI:104634]
CD4+ memory T	mt-Nd5	7.64142e-28	-0.0714506	0.883	0.887	1.2347e-23	mitochondrially encoded NADH dehydrogenase 5 [Source:MGI Symbol;Acc:MGI:102496]
CD4+ memory T	Tmem30a	7.84077e-28	-0.150056	0.422	0.486	1.26691e-23	transmembrane protein 30A [Source:MGI Symbol;Acc:MGI:106402]
CD4+ memory T	Gtf3c2	8.08065e-28	-0.14859	0.285	0.362	1.30567e-23	general transcription factor IIIC, polypeptide 2, beta [Source:MGI Symbol;Acc:MGI:1919002]
CD4+ memory T	Arfgef1	1.43345e-27	-0.13349	0.459	0.513	2.31616e-23	ADP-ribosylation factor guanine nucleotide-exchange factor 1(brefeldin A-inhibited) [Source:MGI Symbol;Acc:MGI:2442988]
CD4+ memory T	Rps15a	1.59669e-27	0.729743	0.96	0.949	2.57993e-23	ribosomal protein S15A [Source:MGI Symbol;Acc:MGI:2389091]
CD4+ memory T	Notch1	2.05509e-27	-0.126754	0.448	0.507	3.32061e-23	notch 1 [Source:MGI Symbol;Acc:MGI:97363]
CD4+ memory T	Pds5a	2.86547e-27	-0.134927	0.412	0.488	4.63003e-23	PDS5 cohesin associated factor A [Source:MGI Symbol;Acc:MGI:1918771]
CD4+ memory T	Sesn3	3.80496e-27	-0.130173	0.527	0.572	6.14806e-23	sestrin 3 [Source:MGI Symbol;Acc:MGI:1922997]
CD4+ memory T	Ddx6	4.2771e-27	-0.0772561	0.753	0.773	6.91094e-23	DEAD (Asp-Glu-Ala-Asp) box polypeptide 6 [Source:MGI Symbol;Acc:MGI:104976]
CD4+ memory T	Mbnl1	1.05526e-26	0.00146799	0.969	0.968	1.70509e-22	muscleblind like splicing factor 1 [Source:MGI Symbol;Acc:MGI:1928482]
CD4+ memory T	Ptprc	1.54945e-26	0.0232523	0.984	0.984	2.5036e-22	protein tyrosine phosphatase, receptor type, C [Source:MGI Symbol;Acc:MGI:97810]
CD4+ memory T	Gls	1.60887e-26	-0.10188	0.577	0.626	2.59962e-22	glutaminase [Source:MGI Symbol;Acc:MGI:95752]
CD4+ memory T	Strn3	1.91644e-26	-0.137371	0.293	0.375	3.09658e-22	striatin, calmodulin binding protein 3 [Source:MGI Symbol;Acc:MGI:2151064]
CD4+ memory T	St8sia4	2.09233e-26	-0.153633	0.462	0.532	3.38078e-22	ST8 alpha-N-acetyl-neuraminide alpha-2,8-sialyltransferase 4 [Source:MGI Symbol;Acc:MGI:106018]
CD4+ memory T	Ikbkb	2.22128e-26	-0.134666	0.4	0.468	3.58914e-22	inhibitor of kappaB kinase beta [Source:MGI Symbol;Acc:MGI:1338071]
CD4+ memory T	Atrx	3.44811e-26	-0.0551194	0.762	0.804	5.57146e-22	ATRX, chromatin remodeler [Source:MGI Symbol;Acc:MGI:103067]
CD4+ memory T	Tmem123	3.81222e-26	-0.158916	0.332	0.392	6.15979e-22	transmembrane protein 123 [Source:MGI Symbol;Acc:MGI:1919179]
CD4+ memory T	Rpl32	3.89556e-26	0.687606	0.955	0.942	6.29445e-22	ribosomal protein L32 [Source:MGI Symbol;Acc:MGI:98038]
CD4+ memory T	Cbx7	5.34442e-26	-0.131692	0.35	0.421	8.63552e-22	chromobox 7 [Source:MGI Symbol;Acc:MGI:1196439]
CD4+ memory T	Selenow	6.46918e-26	0.478875	0.725	0.566	1.04529e-21	selenoprotein W [Source:MGI Symbol;Acc:MGI:1100878]
CD4+ memory T	Mllt6	6.89421e-26	-0.131413	0.458	0.525	1.11397e-21	myeloid/lymphoid or mixed-lineage leukemia; translocated to, 6 [Source:MGI Symbol;Acc:MGI:1935145]
CD4+ memory T	Ssr4	9.46147e-26	0.445332	0.523	0.324	1.52878e-21	signal sequence receptor, delta [Source:MGI Symbol;Acc:MGI:1099464]
CD4+ memory T	Itpkb	1.06996e-25	-0.0997366	0.602	0.65	1.72884e-21	inositol 1,4,5-trisphosphate 3-kinase B [Source:MGI Symbol;Acc:MGI:109235]
CD4+ memory T	Heca	1.50253e-25	-0.118357	0.385	0.447	2.42779e-21	hdc homolog, cell cycle regulator [Source:MGI Symbol;Acc:MGI:2685715]
CD4+ memory T	Pura	2.00427e-25	-0.0944896	0.624	0.622	3.2385e-21	purine rich element binding protein A [Source:MGI Symbol;Acc:MGI:103079]
CD4+ memory T	Rpl21	2.94937e-25	0.622007	0.954	0.951	4.76558e-21	ribosomal protein L21 [Source:MGI Symbol;Acc:MGI:1278340]
CD4+ memory T	Cd3g	3.09839e-25	0.598926	0.929	0.871	5.00638e-21	CD3 antigen, gamma polypeptide [Source:MGI Symbol;Acc:MGI:88333]
CD4+ memory T	Ppp6r3	3.68094e-25	-0.124615	0.351	0.413	5.94767e-21	protein phosphatase 6, regulatory subunit 3 [Source:MGI Symbol;Acc:MGI:1921807]
CD4+ memory T	Itm2b	4.71257e-25	0.508199	0.895	0.805	7.61457e-21	integral membrane protein 2B [Source:MGI Symbol;Acc:MGI:1309517]
CD4+ memory T	Cd28	4.89319e-25	-0.0893658	0.672	0.684	7.90642e-21	CD28 antigen [Source:MGI Symbol;Acc:MGI:88327]
CD4+ memory T	Matr3	5.97896e-25	-0.103846	0.56	0.585	9.6608e-21	matrin 3 [Source:MGI Symbol;Acc:MGI:1298379]
CD4+ memory T	H2-Ob	7.0268e-25	-0.258	0.162	0.275	1.13539e-20	histocompatibility 2, O region beta locus [Source:MGI Symbol;Acc:MGI:95925]
CD4+ memory T	Msi2	7.3343e-25	-0.102059	0.578	0.599	1.18508e-20	musashi RNA-binding protein 2 [Source:MGI Symbol;Acc:MGI:1923876]
CD4+ memory T	Rps3	8.52828e-25	0.638411	0.957	0.93	1.378e-20	ribosomal protein S3 [Source:MGI Symbol;Acc:MGI:1350917]
CD4+ memory T	Dock10	1.06049e-24	-0.106498	0.576	0.611	1.71354e-20	dedicator of cytokinesis 10 [Source:MGI Symbol;Acc:MGI:2146320]
CD4+ memory T	Trp53inp1	1.14392e-24	-0.132042	0.439	0.491	1.84835e-20	transformation related protein 53 inducible nuclear protein 1 [Source:MGI Symbol;Acc:MGI:1926609]
CD4+ memory T	Unc93b1	1.20958e-24	-0.211854	0.193	0.293	1.95444e-20	unc-93 homolog B1, TLR signaling regulator [Source:MGI Symbol;Acc:MGI:1859307]
CD4+ memory T	Tab2	1.2485e-24	-0.112342	0.462	0.536	2.01733e-20	TGF-beta activated kinase 1/MAP3K7 binding protein 2 [Source:MGI Symbol;Acc:MGI:1915902]
CD4+ memory T	Mcl1	1.49073e-24	-0.0758187	0.725	0.75	2.40872e-20	myeloid cell leukemia sequence 1 [Source:MGI Symbol;Acc:MGI:101769]
CD4+ memory T	Rplp0	1.84822e-24	0.692145	0.929	0.911	2.98635e-20	ribosomal protein, large, P0 [Source:MGI Symbol;Acc:MGI:1927636]
CD4+ memory T	Ubtf	2.04956e-24	-0.110378	0.473	0.521	3.31168e-20	upstream binding transcription factor, RNA polymerase I [Source:MGI Symbol;Acc:MGI:98512]
CD4+ memory T	Icos	3.18733e-24	-0.121817	0.53	0.571	5.15009e-20	inducible T cell co-stimulator [Source:MGI Symbol;Acc:MGI:1858745]
CD4+ memory T	Gapdh	4.78667e-24	0.637967	0.807	0.72	7.73429e-20	glyceraldehyde-3-phosphate dehydrogenase [Source:MGI Symbol;Acc:MGI:95640]
CD4+ memory T	Marf1	6.67399e-24	-0.116593	0.344	0.411	1.07838e-19	meiosis regulator and mRNA stability 1 [Source:MGI Symbol;Acc:MGI:2444505]
CD4+ memory T	Myh9	7.84759e-24	-0.0224106	0.87	0.895	1.26801e-19	myosin, heavy polypeptide 9, non-muscle [Source:MGI Symbol;Acc:MGI:107717]
CD4+ memory T	Ppp2r5c	8.49224e-24	-0.107083	0.503	0.541	1.37218e-19	protein phosphatase 2, regulatory subunit B', gamma [Source:MGI Symbol;Acc:MGI:1349475]
CD4+ memory T	Pdcd6ip	8.60848e-24	-0.125524	0.394	0.454	1.39096e-19	programmed cell death 6 interacting protein [Source:MGI Symbol;Acc:MGI:1333753]
CD4+ memory T	Rpl23a	9.01225e-24	-0.0271499	0.927	0.949	1.4562e-19	ribosomal protein L23A [Source:MGI Symbol;Acc:MGI:3040672]
CD4+ memory T	Usp7	1.01539e-23	-0.10919	0.427	0.49	1.64067e-19	ubiquitin specific peptidase 7 [Source:MGI Symbol;Acc:MGI:2182061]
CD4+ memory T	Trbc2	2.12242e-23	0.664604	0.92	0.879	3.42941e-19	T cell receptor beta, constant 2 [Source:MGI Symbol;Acc:MGI:4835227]
CD4+ memory T	Iglc3	2.25568e-23	-0.319852	0.145	0.258	3.64473e-19	immunoglobulin lambda constant 3 [Source:MGI Symbol;Acc:MGI:99886]
CD4+ memory T	Il2rb	2.45544e-23	-0.107347	0.623	0.653	3.9675e-19	interleukin 2 receptor, beta chain [Source:MGI Symbol;Acc:MGI:96550]
CD4+ memory T	Rpl34	2.72767e-23	0.653776	0.96	0.941	4.40738e-19	ribosomal protein L34 [Source:MGI Symbol;Acc:MGI:1915686]
CD4+ memory T	Tob2	3.0337e-23	-0.15389	0.252	0.333	4.90185e-19	transducer of ERBB2, 2 [Source:MGI Symbol;Acc:MGI:1888525]
CD4+ memory T	Slc12a6	3.04314e-23	-0.129723	0.333	0.394	4.91711e-19	solute carrier family 12, member 6 [Source:MGI Symbol;Acc:MGI:2135960]
CD4+ memory T	Gata3	3.2904e-23	-0.132817	0.43	0.505	5.31663e-19	GATA binding protein 3 [Source:MGI Symbol;Acc:MGI:95663]
CD4+ memory T	mt-Nd3	3.44095e-23	-0.017456	0.91	0.916	5.55988e-19	mitochondrially encoded NADH dehydrogenase 3 [Source:MGI Symbol;Acc:MGI:102499]
CD4+ memory T	Fubp1	3.56477e-23	-0.0761344	0.704	0.717	5.75996e-19	far upstream element (FUSE) binding protein 1 [Source:MGI Symbol;Acc:MGI:1196294]
CD4+ memory T	Msl2	3.69701e-23	-0.113131	0.326	0.403	5.97362e-19	MSL complex subunit 2 [Source:MGI Symbol;Acc:MGI:1925103]
CD4+ memory T	Golga4	3.96388e-23	-0.124199	0.385	0.431	6.40484e-19	golgi autoantigen, golgin subfamily a, 4 [Source:MGI Symbol;Acc:MGI:1859646]
CD4+ memory T	Tnks2	3.97222e-23	-0.110644	0.376	0.437	6.41832e-19	tankyrase, TRF1-interacting ankyrin-related ADP-ribose polymerase 2 [Source:MGI Symbol;Acc:MGI:1921743]
CD4+ memory T	Nap1l1	6.59483e-23	-0.140996	0.544	0.609	1.06559e-18	nucleosome assembly protein 1-like 1 [Source:MGI Symbol;Acc:MGI:1855693]
CD4+ memory T	Nxf1	6.81044e-23	-0.138207	0.238	0.319	1.10043e-18	nuclear RNA export factor 1 [Source:MGI Symbol;Acc:MGI:1858330]
CD4+ memory T	Kdm2a	7.21097e-23	-0.0898461	0.52	0.552	1.16515e-18	lysine (K)-specific demethylase 2A [Source:MGI Symbol;Acc:MGI:1354736]
CD4+ memory T	Ccnl1	7.30734e-23	-0.0927005	0.513	0.566	1.18072e-18	cyclin L1 [Source:MGI Symbol;Acc:MGI:1922664]
CD4+ memory T	Ints6	8.12911e-23	-0.148558	0.249	0.321	1.3135e-18	integrator complex subunit 6 [Source:MGI Symbol;Acc:MGI:1202397]
CD4+ memory T	Rps7	9.81826e-23	0.647785	0.955	0.946	1.58643e-18	ribosomal protein S7 [Source:MGI Symbol;Acc:MGI:1333818]
CD4+ memory T	Cnot6	1.06663e-22	-0.126577	0.295	0.364	1.72347e-18	CCR4-NOT transcription complex, subunit 6 [Source:MGI Symbol;Acc:MGI:2144529]
CD4+ memory T	Cd53	1.31826e-22	-0.0802502	0.728	0.736	2.13005e-18	CD53 antigen [Source:MGI Symbol;Acc:MGI:88341]
CD4+ memory T	H2-D1	1.61515e-22	0.528793	0.989	0.975	2.60975e-18	histocompatibility 2, D region locus 1 [Source:MGI Symbol;Acc:MGI:95896]
CD4+ memory T	Rassf2	1.68788e-22	-0.129729	0.345	0.395	2.72728e-18	Ras association (RalGDS/AF-6) domain family member 2 [Source:MGI Symbol;Acc:MGI:2442060]
CD4+ memory T	Cbl	1.72589e-22	-0.112032	0.453	0.525	2.78869e-18	Casitas B-lineage lymphoma [Source:MGI Symbol;Acc:MGI:88279]
CD4+ memory T	Evl	1.76738e-22	-0.119178	0.402	0.448	2.85573e-18	Ena-vasodilator stimulated phosphoprotein [Source:MGI Symbol;Acc:MGI:1194884]
CD4+ memory T	Hdac7	1.94208e-22	-0.141954	0.405	0.448	3.13801e-18	histone deacetylase 7 [Source:MGI Symbol;Acc:MGI:1891835]
CD4+ memory T	Zfp871	2.07103e-22	-0.111184	0.38	0.432	3.34637e-18	zinc finger protein 871 [Source:MGI Symbol;Acc:MGI:1921793]
CD4+ memory T	Smg1	2.19111e-22	-0.0921197	0.496	0.547	3.5404e-18	SMG1 homolog, phosphatidylinositol 3-kinase-related kinase (C. elegans) [Source:MGI Symbol;Acc:MGI:1919742]
CD4+ memory T	Psme2b	2.21162e-22	-0.134049	0.271	0.338	3.57353e-18	protease (prosome, macropain) activator subunit 2B [Source:MGI Symbol;Acc:MGI:1341073]
CD4+ memory T	Zkscan3	2.39805e-22	-0.135185	0.27	0.345	3.87478e-18	zinc finger with KRAB and SCAN domains 3 [Source:MGI Symbol;Acc:MGI:1919989]
CD4+ memory T	Prpf38b	2.66962e-22	-0.069227	0.694	0.71	4.31357e-18	PRP38 pre-mRNA processing factor 38 (yeast) domain containing B [Source:MGI Symbol;Acc:MGI:1914171]
CD4+ memory T	Dmtf1	2.73076e-22	-0.108632	0.326	0.396	4.41236e-18	cyclin D binding myb-like transcription factor 1 [Source:MGI Symbol;Acc:MGI:1344415]
CD4+ memory T	Kmt2a	2.90424e-22	-0.0266916	0.805	0.79	4.69266e-18	lysine (K)-specific methyltransferase 2A [Source:MGI Symbol;Acc:MGI:96995]
CD4+ memory T	Sf3b3	3.58161e-22	-0.109331	0.401	0.446	5.78717e-18	splicing factor 3b, subunit 3 [Source:MGI Symbol;Acc:MGI:1289341]
CD4+ memory T	Ptpn7	3.60997e-22	-0.102156	0.539	0.564	5.83299e-18	protein tyrosine phosphatase, non-receptor type 7 [Source:MGI Symbol;Acc:MGI:2156893]
CD4+ memory T	Fchsd2	3.78295e-22	-0.187517	0.224	0.3	6.11249e-18	FCH and double SH3 domains 2 [Source:MGI Symbol;Acc:MGI:2448475]
CD4+ memory T	Baz1b	4.24809e-22	-0.097154	0.478	0.529	6.86407e-18	bromodomain adjacent to zinc finger domain, 1B [Source:MGI Symbol;Acc:MGI:1353499]
CD4+ memory T	Ldb1	5.29805e-22	-0.100434	0.426	0.488	8.56059e-18	LIM domain binding 1 [Source:MGI Symbol;Acc:MGI:894762]
CD4+ memory T	Gm8369	7.01446e-22	0.420556	0.6	0.426	1.1334e-17	predicted gene 8369 [Source:MGI Symbol;Acc:MGI:3645380]
CD4+ memory T	Tnrc6b	7.07134e-22	-0.0646467	0.682	0.691	1.14259e-17	trinucleotide repeat containing 6b [Source:MGI Symbol;Acc:MGI:2443730]
CD4+ memory T	Pum2	7.45238e-22	-0.0919647	0.538	0.586	1.20415e-17	pumilio RNA-binding family member 2 [Source:MGI Symbol;Acc:MGI:1931751]
CD4+ memory T	Rbm5	8.34443e-22	-0.0567646	0.634	0.659	1.34829e-17	RNA binding motif protein 5 [Source:MGI Symbol;Acc:MGI:1933204]
CD4+ memory T	Phf1	8.85894e-22	-0.130296	0.242	0.322	1.43143e-17	PHD finger protein 1 [Source:MGI Symbol;Acc:MGI:98647]
CD4+ memory T	Ddx3y	8.99391e-22	-0.124871	0.318	0.394	1.45324e-17	DEAD box helicase 3, Y-linked [Source:MGI Symbol;Acc:MGI:1349406]
CD4+ memory T	Cox8a	1.46966e-21	0.518976	0.744	0.625	2.37468e-17	cytochrome c oxidase subunit 8A [Source:MGI Symbol;Acc:MGI:105959]
CD4+ memory T	Hnrnpm	1.65119e-21	-0.0779782	0.612	0.632	2.668e-17	heterogeneous nuclear ribonucleoprotein M [Source:MGI Symbol;Acc:MGI:1926465]
CD4+ memory T	Mef2d	2.00978e-21	-0.124395	0.262	0.331	3.24741e-17	myocyte enhancer factor 2D [Source:MGI Symbol;Acc:MGI:99533]
CD4+ memory T	Eno1	2.23797e-21	0.417841	0.56	0.419	3.61612e-17	enolase 1, alpha non-neuron [Source:MGI Symbol;Acc:MGI:95393]
CD4+ memory T	Atf4	2.39952e-21	-0.118925	0.33	0.39	3.87714e-17	activating transcription factor 4 [Source:MGI Symbol;Acc:MGI:88096]
CD4+ memory T	R3hdm1	2.49979e-21	-0.0791808	0.485	0.526	4.03915e-17	R3H domain containing 1 [Source:MGI Symbol;Acc:MGI:2448514]
CD4+ memory T	Crip1	2.87907e-21	0.640914	0.701	0.629	4.652e-17	cysteine-rich protein 1 (intestinal) [Source:MGI Symbol;Acc:MGI:88501]
CD4+ memory T	Bcl11b	3.00005e-21	-0.040396	0.771	0.757	4.84749e-17	B cell leukemia/lymphoma 11B [Source:MGI Symbol;Acc:MGI:1929913]
CD4+ memory T	Sec61g	3.25388e-21	0.464206	0.661	0.538	5.25762e-17	SEC61, gamma subunit [Source:MGI Symbol;Acc:MGI:1202066]
CD4+ memory T	Msl1	4.19018e-21	-0.106182	0.355	0.399	6.77049e-17	male specific lethal 1 [Source:MGI Symbol;Acc:MGI:1921276]
CD4+ memory T	Cybc1	5.21323e-21	-0.132566	0.234	0.309	8.42353e-17	cytochrome b 245 chaperone 1 [Source:MGI Symbol;Acc:MGI:2384959]
CD4+ memory T	Safb2	6.1781e-21	-0.0797473	0.48	0.524	9.98257e-17	scaffold attachment factor B2 [Source:MGI Symbol;Acc:MGI:2146808]
CD4+ memory T	Prkcb	7.27377e-21	-0.151714	0.253	0.313	1.1753e-16	protein kinase C, beta [Source:MGI Symbol;Acc:MGI:97596]
CD4+ memory T	Prrc2a	8.99212e-21	-0.0902787	0.477	0.524	1.45295e-16	proline-rich coiled-coil 2A [Source:MGI Symbol;Acc:MGI:1915467]
CD4+ memory T	Ash1l	9.3205e-21	-0.0575889	0.645	0.659	1.50601e-16	ASH1 like histone lysine methyltransferase [Source:MGI Symbol;Acc:MGI:2183158]
CD4+ memory T	Gdi1	1.19808e-20	-0.135666	0.211	0.292	1.93586e-16	guanosine diphosphate (GDP) dissociation inhibitor 1 [Source:MGI Symbol;Acc:MGI:99846]
CD4+ memory T	Luc7l2	1.24504e-20	-0.0266444	0.822	0.806	2.01174e-16	LUC7-like 2 (S. cerevisiae) [Source:MGI Symbol;Acc:MGI:2183260]
CD4+ memory T	Purb	1.25884e-20	-0.0808844	0.641	0.66	2.03403e-16	purine rich element binding protein B [Source:MGI Symbol;Acc:MGI:1338779]
CD4+ memory T	Pfdn5	1.30001e-20	0.493921	0.807	0.716	2.10056e-16	prefoldin 5 [Source:MGI Symbol;Acc:MGI:1928753]
CD4+ memory T	Mxd4	1.36313e-20	-0.116127	0.522	0.576	2.20254e-16	Max dimerization protein 4 [Source:MGI Symbol;Acc:MGI:104991]
CD4+ memory T	Hsp90b1	1.38861e-20	-0.106239	0.676	0.719	2.24371e-16	heat shock protein 90, beta (Grp94), member 1 [Source:MGI Symbol;Acc:MGI:98817]
CD4+ memory T	Rbm39	1.40057e-20	0.02769	0.936	0.93	2.26305e-16	RNA binding motif protein 39 [Source:MGI Symbol;Acc:MGI:2157953]
CD4+ memory T	Cdk17	1.43183e-20	-0.110613	0.318	0.366	2.31356e-16	cyclin-dependent kinase 17 [Source:MGI Symbol;Acc:MGI:97517]
CD4+ memory T	Serinc3	1.4884e-20	-0.127661	0.71	0.733	2.40495e-16	serine incorporator 3 [Source:MGI Symbol;Acc:MGI:1349457]
CD4+ memory T	Ankrd44	1.4904e-20	-0.08612	0.602	0.63	2.40818e-16	ankyrin repeat domain 44 [Source:MGI Symbol;Acc:MGI:3045243]
CD4+ memory T	Pcbp2	1.67473e-20	-0.0496598	0.696	0.719	2.70603e-16	poly(rC) binding protein 2 [Source:MGI Symbol;Acc:MGI:108202]
CD4+ memory T	Srsf6	1.70793e-20	-0.097415	0.463	0.505	2.75967e-16	serine and arginine-rich splicing factor 6 [Source:MGI Symbol;Acc:MGI:1915246]
CD4+ memory T	Brwd1	2.5043e-20	-0.125251	0.268	0.333	4.04645e-16	bromodomain and WD repeat domain containing 1 [Source:MGI Symbol;Acc:MGI:1890651]
CD4+ memory T	Cr2	3.26876e-20	-0.444342	0.079	0.203	5.28166e-16	complement receptor 2 [Source:MGI Symbol;Acc:MGI:88489]
CD4+ memory T	Ttc14	3.43528e-20	-0.0667968	0.65	0.659	5.55073e-16	tetratricopeptide repeat domain 14 [Source:MGI Symbol;Acc:MGI:1914370]
CD4+ memory T	Ppp2r5a	3.6636e-20	-0.0912875	0.454	0.503	5.91964e-16	protein phosphatase 2, regulatory subunit B', alpha [Source:MGI Symbol;Acc:MGI:2388479]
CD4+ memory T	Aldoa	4.68501e-20	0.461595	0.659	0.52	7.57004e-16	aldolase A, fructose-bisphosphate [Source:MGI Symbol;Acc:MGI:87994]
CD4+ memory T	Atp5g1	5.05673e-20	0.421934	0.522	0.354	8.17067e-16	ATP synthase, H+ transporting, mitochondrial F0 complex, subunit C1 (subunit 9) [Source:MGI Symbol;Acc:MGI:107653]
CD4+ memory T	Fus	5.85304e-20	-0.0206829	0.815	0.811	9.45734e-16	fused in sarcoma [Source:MGI Symbol;Acc:MGI:1353633]
CD4+ memory T	Rock1	5.88805e-20	-0.0507701	0.717	0.724	9.51391e-16	Rho-associated coiled-coil containing protein kinase 1 [Source:MGI Symbol;Acc:MGI:107927]
CD4+ memory T	Ets1	6.51454e-20	0.00997581	0.917	0.925	1.05262e-15	E26 avian leukemia oncogene 1, 5' domain [Source:MGI Symbol;Acc:MGI:95455]
CD4+ memory T	Wdr1	6.75264e-20	-0.0853741	0.505	0.53	1.09109e-15	WD repeat domain 1 [Source:MGI Symbol;Acc:MGI:1337100]
CD4+ memory T	Far1	7.01957e-20	-0.115529	0.26	0.335	1.13422e-15	fatty acyl CoA reductase 1 [Source:MGI Symbol;Acc:MGI:1914670]
CD4+ memory T	Rps15	7.81375e-20	0.0233162	0.958	0.968	1.26255e-15	ribosomal protein S15 [Source:MGI Symbol;Acc:MGI:98117]
CD4+ memory T	Csk	9.97284e-20	-0.0872423	0.496	0.529	1.61141e-15	c-src tyrosine kinase [Source:MGI Symbol;Acc:MGI:88537]
CD4+ memory T	Cpsf6	1.12452e-19	-0.0892669	0.419	0.459	1.817e-15	cleavage and polyadenylation specific factor 6 [Source:MGI Symbol;Acc:MGI:1913948]
CD4+ memory T	Rock2	1.243e-19	-0.0931485	0.407	0.455	2.00843e-15	Rho-associated coiled-coil containing protein kinase 2 [Source:MGI Symbol;Acc:MGI:107926]
CD4+ memory T	Esyt2	1.3533e-19	-0.0791587	0.51	0.554	2.18667e-15	extended synaptotagmin-like protein 2 [Source:MGI Symbol;Acc:MGI:1261845]
CD4+ memory T	Slc38a1	1.52032e-19	-0.0844464	0.497	0.525	2.45653e-15	solute carrier family 38, member 1 [Source:MGI Symbol;Acc:MGI:2145895]
CD4+ memory T	Csde1	1.57147e-19	-0.0505441	0.614	0.64	2.53918e-15	cold shock domain containing E1, RNA binding [Source:MGI Symbol;Acc:MGI:92356]
CD4+ memory T	Cox5b	2.02165e-19	0.405224	0.621	0.452	3.26658e-15	cytochrome c oxidase subunit 5B [Source:MGI Symbol;Acc:MGI:88475]
CD4+ memory T	Rpl9	2.06372e-19	0.596966	0.954	0.942	3.33456e-15	ribosomal protein L9 [Source:MGI Symbol;Acc:MGI:1298373]
CD4+ memory T	Itsn2	2.17245e-19	-0.0846005	0.476	0.505	3.51024e-15	intersectin 2 [Source:MGI Symbol;Acc:MGI:1338049]
CD4+ memory T	Mif	2.53735e-19	0.479277	0.569	0.421	4.09986e-15	macrophage migration inhibitory factor (glycosylation-inhibiting factor) [Source:MGI Symbol;Acc:MGI:96982]
CD4+ memory T	Elf1	2.69299e-19	-0.0694644	0.581	0.611	4.35133e-15	E74-like factor 1 [Source:MGI Symbol;Acc:MGI:107180]
CD4+ memory T	Rpl24	2.89845e-19	0.601817	0.932	0.911	4.68332e-15	ribosomal protein L24 [Source:MGI Symbol;Acc:MGI:1915443]
CD4+ memory T	Spcs2	2.94744e-19	0.391971	0.65	0.489	4.76248e-15	signal peptidase complex subunit 2 homolog (S. cerevisiae) [Source:MGI Symbol;Acc:MGI:1913874]
CD4+ memory T	Tcf7	3.36959e-19	-0.061162	0.664	0.672	5.44458e-15	transcription factor 7, T cell specific [Source:MGI Symbol;Acc:MGI:98507]
CD4+ memory T	Rpl29	3.61768e-19	0.41399	0.389	0.239	5.84545e-15	ribosomal protein L29 [Source:MGI Symbol;Acc:MGI:99687]
CD4+ memory T	Arhgap15	4.18357e-19	-0.0665891	0.639	0.647	6.75981e-15	Rho GTPase activating protein 15 [Source:MGI Symbol;Acc:MGI:1923367]
CD4+ memory T	Med13	4.27518e-19	-0.102696	0.363	0.394	6.90783e-15	mediator complex subunit 13 [Source:MGI Symbol;Acc:MGI:3029632]
CD4+ memory T	Ivns1abp	4.32711e-19	-0.106731	0.293	0.358	6.99174e-15	influenza virus NS1A binding protein [Source:MGI Symbol;Acc:MGI:2152389]
CD4+ memory T	Dtx1	4.85276e-19	-0.148874	0.289	0.371	7.84109e-15	deltex 1, E3 ubiquitin ligase [Source:MGI Symbol;Acc:MGI:1352744]
CD4+ memory T	Cirbp	5.14351e-19	0.365155	0.445	0.246	8.31089e-15	cold inducible RNA binding protein [Source:MGI Symbol;Acc:MGI:893588]
CD4+ memory T	Crebbp	5.83751e-19	-0.0759529	0.516	0.546	9.43225e-15	CREB binding protein [Source:MGI Symbol;Acc:MGI:1098280]
CD4+ memory T	Plekha2	5.93036e-19	-0.116116	0.282	0.345	9.58228e-15	pleckstrin homology domain-containing, family A (phosphoinositide binding specific) member 2 [Source:MGI Symbol;Acc:MGI:1928144]
CD4+ memory T	2022-09-09	6.32033e-19	-0.0745162	0.559	0.583	1.02124e-14	NA
CD4+ memory T	Eef1g	6.62386e-19	-0.0574409	0.758	0.766	1.07028e-14	eukaryotic translation elongation factor 1 gamma [Source:MGI Symbol;Acc:MGI:1914410]
CD4+ memory T	Ablim1	7.28997e-19	-0.0544812	0.719	0.751	1.17791e-14	actin-binding LIM protein 1 [Source:MGI Symbol;Acc:MGI:1194500]
CD4+ memory T	Scd2	8.1174e-19	-0.188995	0.171	0.262	1.31161e-14	stearoyl-Coenzyme A desaturase 2 [Source:MGI Symbol;Acc:MGI:98240]
CD4+ memory T	Akna	9.96281e-19	-0.0702925	0.511	0.541	1.60979e-14	AT-hook transcription factor [Source:MGI Symbol;Acc:MGI:2140340]
CD4+ memory T	Foxn3	1.22854e-18	-0.103235	0.429	0.474	1.98508e-14	forkhead box N3 [Source:MGI Symbol;Acc:MGI:1918625]
CD4+ memory T	Btg1	1.26453e-18	0.0417426	0.942	0.945	2.04322e-14	BTG anti-proliferation factor 1 [Source:MGI Symbol;Acc:MGI:88215]
CD4+ memory T	Hipk1	1.3596e-18	-0.0867017	0.401	0.452	2.19685e-14	homeodomain interacting protein kinase 1 [Source:MGI Symbol;Acc:MGI:1314873]
CD4+ memory T	Slc44a2	1.49376e-18	-0.0936549	0.374	0.428	2.41361e-14	solute carrier family 44, member 2 [Source:MGI Symbol;Acc:MGI:1915932]
CD4+ memory T	Gatad2b	1.65119e-18	-0.0751646	0.45	0.477	2.668e-14	GATA zinc finger domain containing 2B [Source:MGI Symbol;Acc:MGI:2443225]
CD4+ memory T	Gdi2	2.04467e-18	-0.054529	0.636	0.647	3.30378e-14	guanosine diphosphate (GDP) dissociation inhibitor 2 [Source:MGI Symbol;Acc:MGI:99845]
CD4+ memory T	Nfatc3	2.28864e-18	-0.0777526	0.602	0.643	3.69798e-14	nuclear factor of activated T cells, cytoplasmic, calcineurin dependent 3 [Source:MGI Symbol;Acc:MGI:103296]
CD4+ memory T	Ywhaz	2.35062e-18	-0.0366482	0.748	0.757	3.79813e-14	tyrosine 3-monooxygenase/tryptophan 5-monooxygenase activation protein, zeta polypeptide [Source:MGI Symbol;Acc:MGI:109484]
CD4+ memory T	Qk	2.8712e-18	-0.11432	0.245	0.305	4.63929e-14	quaking, KH domain containing RNA binding [Source:MGI Symbol;Acc:MGI:97837]
CD4+ memory T	Ttc39b	2.92916e-18	-0.0703824	0.463	0.508	4.73293e-14	tetratricopeptide repeat domain 39B [Source:MGI Symbol;Acc:MGI:1917113]
CD4+ memory T	Cacybp	3.01978e-18	-0.105734	0.315	0.37	4.87936e-14	calcyclin binding protein [Source:MGI Symbol;Acc:MGI:1270839]
CD4+ memory T	Limd1	3.11551e-18	-0.116064	0.279	0.336	5.03404e-14	LIM domains containing 1 [Source:MGI Symbol;Acc:MGI:1352502]
CD4+ memory T	Ywhab	3.47788e-18	-0.0767051	0.54	0.568	5.61956e-14	tyrosine 3-monooxygenase/tryptophan 5-monooxygenase activation protein, beta polypeptide [Source:MGI Symbol;Acc:MGI:1891917]
CD4+ memory T	Ccnt2	3.48575e-18	-0.0801646	0.364	0.399	5.63228e-14	cyclin T2 [Source:MGI Symbol;Acc:MGI:1920199]
CD4+ memory T	C2cd5	3.67049e-18	-0.0997444	0.29	0.347	5.93078e-14	C2 calcium-dependent domain containing 5 [Source:MGI Symbol;Acc:MGI:1921991]
CD4+ memory T	Phf21a	4.04796e-18	-0.109646	0.261	0.318	6.54069e-14	PHD finger protein 21A [Source:MGI Symbol;Acc:MGI:2384756]
CD4+ memory T	Smarcd2	4.09163e-18	-0.111335	0.244	0.303	6.61126e-14	SWI/SNF related, matrix associated, actin dependent regulator of chromatin, subfamily d, member 2 [Source:MGI Symbol;Acc:MGI:1933621]
CD4+ memory T	Sri	4.23613e-18	0.393627	0.599	0.441	6.84474e-14	sorcin [Source:MGI Symbol;Acc:MGI:98419]
CD4+ memory T	Rnaset2a	4.50205e-18	0.389455	0.51	0.371	7.27441e-14	ribonuclease T2A [Source:MGI Symbol;Acc:MGI:1915445]
CD4+ memory T	Wdr26	4.59037e-18	-0.0678591	0.536	0.571	7.41712e-14	WD repeat domain 26 [Source:MGI Symbol;Acc:MGI:1923825]
CD4+ memory T	Nlrc5	4.63132e-18	-0.0884149	0.336	0.379	7.48328e-14	NLR family, CARD domain containing 5 [Source:MGI Symbol;Acc:MGI:3612191]
CD4+ memory T	Nipbl	5.37075e-18	-0.0346553	0.678	0.676	8.67805e-14	NIPBL cohesin loading factor [Source:MGI Symbol;Acc:MGI:1913976]
CD4+ memory T	Dicer1	5.48703e-18	-0.0852017	0.346	0.386	8.86595e-14	dicer 1, ribonuclease type III [Source:MGI Symbol;Acc:MGI:2177178]
CD4+ memory T	Irf8	5.67596e-18	-0.233248	0.163	0.254	9.17122e-14	interferon regulatory factor 8 [Source:MGI Symbol;Acc:MGI:96395]
CD4+ memory T	Rnf145	5.69112e-18	-0.0829088	0.352	0.403	9.19571e-14	ring finger protein 145 [Source:MGI Symbol;Acc:MGI:1921565]
CD4+ memory T	Ipcef1	6.65662e-18	-0.074362	0.447	0.487	1.07558e-13	interaction protein for cytohesin exchange factors 1 [Source:MGI Symbol;Acc:MGI:2444159]
CD4+ memory T	Atp2a3	7.46819e-18	-0.109331	0.313	0.377	1.20671e-13	ATPase, Ca++ transporting, ubiquitous [Source:MGI Symbol;Acc:MGI:1194503]
CD4+ memory T	Cbfb	7.55117e-18	-0.109234	0.265	0.328	1.22012e-13	core binding factor beta [Source:MGI Symbol;Acc:MGI:99851]
CD4+ memory T	Ppp3cb	9.23728e-18	-0.0842746	0.374	0.413	1.49256e-13	protein phosphatase 3, catalytic subunit, beta isoform [Source:MGI Symbol;Acc:MGI:107163]
CD4+ memory T	Tcf12	9.48444e-18	-0.0793017	0.382	0.425	1.5325e-13	transcription factor 12 [Source:MGI Symbol;Acc:MGI:101877]
CD4+ memory T	Ctnnb1	9.99683e-18	-0.0877349	0.344	0.388	1.61529e-13	catenin (cadherin associated protein), beta 1 [Source:MGI Symbol;Acc:MGI:88276]
CD4+ memory T	H2-Eb1	1.0162e-17	-0.316656	0.321	0.362	1.64197e-13	histocompatibility 2, class II antigen E beta [Source:MGI Symbol;Acc:MGI:95901]
CD4+ memory T	Pycard	1.06737e-17	0.386815	0.524	0.377	1.72466e-13	PYD and CARD domain containing [Source:MGI Symbol;Acc:MGI:1931465]
CD4+ memory T	Herc1	1.15916e-17	-0.0693586	0.456	0.492	1.87297e-13	HECT and RLD domain containing E3 ubiquitin protein ligase family member 1 [Source:MGI Symbol;Acc:MGI:2384589]
CD4+ memory T	Ctdsp2	1.16672e-17	-0.0919647	0.317	0.368	1.88519e-13	CTD (carboxy-terminal domain, RNA polymerase II, polypeptide A) small phosphatase 2 [Source:MGI Symbol;Acc:MGI:1098748]
CD4+ memory T	Ago2	1.28896e-17	-0.0807314	0.448	0.495	2.0827e-13	argonaute RISC catalytic subunit 2 [Source:MGI Symbol;Acc:MGI:2446632]
CD4+ memory T	Klhl24	1.40155e-17	-0.090162	0.368	0.398	2.26462e-13	kelch-like 24 [Source:MGI Symbol;Acc:MGI:1923035]
CD4+ memory T	Ptges3	1.49007e-17	-0.0731199	0.449	0.495	2.40765e-13	prostaglandin E synthase 3 [Source:MGI Symbol;Acc:MGI:1929282]
CD4+ memory T	Irf2bp2	1.56391e-17	-0.0731161	0.546	0.56	2.52696e-13	interferon regulatory factor 2 binding protein 2 [Source:MGI Symbol;Acc:MGI:2443921]
CD4+ memory T	Fam111a	1.62677e-17	-0.119252	0.327	0.371	2.62853e-13	family with sequence similarity 111, member A [Source:MGI Symbol;Acc:MGI:1915508]
CD4+ memory T	Zmynd8	1.72695e-17	-0.0716351	0.428	0.461	2.79041e-13	zinc finger, MYND-type containing 8 [Source:MGI Symbol;Acc:MGI:1918025]
CD4+ memory T	Cd2ap	1.7372e-17	-0.0980123	0.342	0.372	2.80696e-13	CD2-associated protein [Source:MGI Symbol;Acc:MGI:1330281]
CD4+ memory T	Stat3	1.83069e-17	-0.0630014	0.524	0.546	2.95803e-13	signal transducer and activator of transcription 3 [Source:MGI Symbol;Acc:MGI:103038]
CD4+ memory T	Malt1	1.85974e-17	-0.0724461	0.654	0.684	3.00497e-13	MALT1 paracaspase [Source:MGI Symbol;Acc:MGI:2445027]
CD4+ memory T	Cox7b	1.93368e-17	0.392593	0.526	0.373	3.12443e-13	cytochrome c oxidase subunit 7B [Source:MGI Symbol;Acc:MGI:1913392]
CD4+ memory T	Ubn2	2.0317e-17	-0.0798058	0.407	0.447	3.28282e-13	ubinuclein 2 [Source:MGI Symbol;Acc:MGI:2444236]
CD4+ memory T	Cybb	2.12772e-17	-0.165787	0.26	0.324	3.43797e-13	cytochrome b-245, beta polypeptide [Source:MGI Symbol;Acc:MGI:88574]
CD4+ memory T	Rgs10	2.18969e-17	0.440637	0.447	0.316	3.53811e-13	regulator of G-protein signalling 10 [Source:MGI Symbol;Acc:MGI:1915115]
CD4+ memory T	Dync1h1	2.59191e-17	-0.0766222	0.448	0.473	4.188e-13	dynein cytoplasmic 1 heavy chain 1 [Source:MGI Symbol;Acc:MGI:103147]
CD4+ memory T	Eif4b	2.60784e-17	-0.0666062	0.509	0.525	4.21374e-13	eukaryotic translation initiation factor 4B [Source:MGI Symbol;Acc:MGI:95304]
CD4+ memory T	Larp4b	3.43932e-17	-0.0933024	0.338	0.382	5.55726e-13	La ribonucleoprotein domain family, member 4B [Source:MGI Symbol;Acc:MGI:106330]
CD4+ memory T	Kat6a	3.73251e-17	-0.0751432	0.387	0.431	6.03098e-13	K(lysine) acetyltransferase 6A [Source:MGI Symbol;Acc:MGI:2442415]
CD4+ memory T	Gna13	3.95371e-17	-0.0726291	0.432	0.462	6.3884e-13	guanine nucleotide binding protein, alpha 13 [Source:MGI Symbol;Acc:MGI:95768]
CD4+ memory T	Dennd1c	4.23403e-17	-0.0642166	0.518	0.554	6.84134e-13	DENN/MADD domain containing 1C [Source:MGI Symbol;Acc:MGI:1918035]
CD4+ memory T	Phc3	4.45538e-17	-0.0657694	0.438	0.47	7.199e-13	polyhomeotic 3 [Source:MGI Symbol;Acc:MGI:2181434]
CD4+ memory T	Ppp1r9b	4.85497e-17	-0.0853292	0.359	0.402	7.84467e-13	protein phosphatase 1, regulatory subunit 9B [Source:MGI Symbol;Acc:MGI:2387581]
CD4+ memory T	Ppp3ca	4.98487e-17	-0.192924	0.206	0.281	8.05455e-13	protein phosphatase 3, catalytic subunit, alpha isoform [Source:MGI Symbol;Acc:MGI:107164]
CD4+ memory T	Nt5e	5.20748e-17	-0.0665609	0.545	0.548	8.41425e-13	5' nucleotidase, ecto [Source:MGI Symbol;Acc:MGI:99782]
CD4+ memory T	Sh3bgrl3	5.43961e-17	0.484048	0.835	0.757	8.78932e-13	SH3 domain binding glutamic acid-rich protein-like 3 [Source:MGI Symbol;Acc:MGI:1920973]
CD4+ memory T	Pten	5.47957e-17	-0.0861487	0.369	0.41	8.85389e-13	phosphatase and tensin homolog [Source:MGI Symbol;Acc:MGI:109583]
CD4+ memory T	Rbm6	5.48077e-17	-0.0713591	0.375	0.42	8.85582e-13	RNA binding motif protein 6 [Source:MGI Symbol;Acc:MGI:1338037]
CD4+ memory T	Stk10	5.69427e-17	-0.0797455	0.435	0.474	9.20081e-13	serine/threonine kinase 10 [Source:MGI Symbol;Acc:MGI:1099439]
CD4+ memory T	Itch	5.70141e-17	-0.0895666	0.328	0.37	9.21234e-13	itchy, E3 ubiquitin protein ligase [Source:MGI Symbol;Acc:MGI:1202301]
CD4+ memory T	Gramd1a	5.99614e-17	-0.0886893	0.346	0.398	9.68856e-13	GRAM domain containing 1A [Source:MGI Symbol;Acc:MGI:105490]
CD4+ memory T	Fam102a	6.15659e-17	-0.084122	0.312	0.377	9.94782e-13	family with sequence similarity 102, member A [Source:MGI Symbol;Acc:MGI:2138935]
CD4+ memory T	Nufip2	6.35602e-17	-0.0449264	0.516	0.544	1.02701e-12	nuclear fragile X mental retardation protein interacting protein 2 [Source:MGI Symbol;Acc:MGI:1915814]
CD4+ memory T	Npepps	6.35781e-17	-0.0902912	0.279	0.332	1.0273e-12	aminopeptidase puromycin sensitive [Source:MGI Symbol;Acc:MGI:1101358]
CD4+ memory T	Ly6d	6.38425e-17	-0.306273	0.201	0.271	1.03157e-12	lymphocyte antigen 6 complex, locus D [Source:MGI Symbol;Acc:MGI:96881]
CD4+ memory T	Elk4	6.97999e-17	-0.0670743	0.45	0.476	1.12783e-12	ELK4, member of ETS oncogene family [Source:MGI Symbol;Acc:MGI:102853]
CD4+ memory T	Hnrnpk	7.71185e-17	-0.0106416	0.75	0.755	1.24608e-12	heterogeneous nuclear ribonucleoprotein K [Source:MGI Symbol;Acc:MGI:99894]
CD4+ memory T	4932438A13Rik	8.21254e-17	-0.0539519	0.55	0.572	1.32698e-12	RIKEN cDNA 4932438A13 gene [Source:MGI Symbol;Acc:MGI:2444631]
CD4+ memory T	Cd3d	8.75227e-17	0.529826	0.899	0.834	1.41419e-12	CD3 antigen, delta polypeptide [Source:MGI Symbol;Acc:MGI:88331]
CD4+ memory T	Lnpep	8.78899e-17	-0.053848	0.614	0.626	1.42012e-12	leucyl/cystinyl aminopeptidase [Source:MGI Symbol;Acc:MGI:2387123]
CD4+ memory T	Khdc4	9.4482e-17	-0.0967103	0.244	0.298	1.52664e-12	KH domain containing 4, pre-mRNA splicing factor [Source:MGI Symbol;Acc:MGI:1921450]
CD4+ memory T	Setd2	1.21384e-16	-0.0710443	0.401	0.432	1.96133e-12	SET domain containing 2 [Source:MGI Symbol;Acc:MGI:1918177]
CD4+ memory T	Hspe1	1.22666e-16	-0.0965593	0.565	0.594	1.98204e-12	heat shock protein 1 (chaperonin 10) [Source:MGI Symbol;Acc:MGI:104680]
CD4+ memory T	Kdm7a	1.29582e-16	-0.0925614	0.319	0.369	2.09379e-12	lysine (K)-specific demethylase 7A [Source:MGI Symbol;Acc:MGI:2443388]
CD4+ memory T	Igf1r	1.41148e-16	-0.0927112	0.431	0.464	2.28068e-12	insulin-like growth factor I receptor [Source:MGI Symbol;Acc:MGI:96433]
CD4+ memory T	Ddx5	1.42263e-16	0.112572	0.97	0.976	2.29869e-12	DEAD box helicase 5 [Source:MGI Symbol;Acc:MGI:105037]
CD4+ memory T	Pnisr	1.47911e-16	-0.00921705	0.72	0.72	2.38995e-12	PNN interacting serine/arginine-rich [Source:MGI Symbol;Acc:MGI:1913875]
CD4+ memory T	Fip1l1	1.61226e-16	-0.0654131	0.451	0.476	2.60509e-12	FIP1 like 1 (S. cerevisiae) [Source:MGI Symbol;Acc:MGI:1914149]
CD4+ memory T	Chd3	1.78351e-16	-0.000885353	0.739	0.748	2.8818e-12	chromodomain helicase DNA binding protein 3 [Source:MGI Symbol;Acc:MGI:1344395]
CD4+ memory T	H3f3a	1.87147e-16	0.449657	0.89	0.795	3.02391e-12	H3.3 histone A [Source:MGI Symbol;Acc:MGI:1097686]
CD4+ memory T	Cab39	1.88574e-16	-0.0679642	0.447	0.491	3.04698e-12	calcium binding protein 39 [Source:MGI Symbol;Acc:MGI:107438]
CD4+ memory T	Ppp1cb	1.91509e-16	-0.0689883	0.38	0.414	3.0944e-12	protein phosphatase 1 catalytic subunit beta [Source:MGI Symbol;Acc:MGI:104871]
CD4+ memory T	Lcp1	2.00674e-16	-0.0438783	0.781	0.793	3.24249e-12	lymphocyte cytosolic protein 1 [Source:MGI Symbol;Acc:MGI:104808]
CD4+ memory T	Tnpo1	2.03272e-16	-0.0934964	0.255	0.301	3.28447e-12	transportin 1 [Source:MGI Symbol;Acc:MGI:2681523]
CD4+ memory T	Maf	2.22827e-16	-0.0460795	0.781	0.766	3.60044e-12	avian musculoaponeurotic fibrosarcoma oncogene homolog [Source:MGI Symbol;Acc:MGI:96909]
CD4+ memory T	Tram1	2.28519e-16	-0.0725661	0.461	0.493	3.69241e-12	translocating chain-associating membrane protein 1 [Source:MGI Symbol;Acc:MGI:1919515]
CD4+ memory T	Scaf11	2.78382e-16	-0.0500389	0.548	0.572	4.4981e-12	SR-related CTD-associated factor 11 [Source:MGI Symbol;Acc:MGI:1919443]
CD4+ memory T	Bank1	3.17435e-16	-0.320378	0.11	0.205	5.12911e-12	B cell scaffold protein with ankyrin repeats 1 [Source:MGI Symbol;Acc:MGI:2442120]
CD4+ memory T	Usp9x	3.72578e-16	-0.0668597	0.382	0.433	6.02012e-12	ubiquitin specific peptidase 9, X chromosome [Source:MGI Symbol;Acc:MGI:894681]
CD4+ memory T	Med13l	4.00179e-16	-0.075363	0.328	0.361	6.46609e-12	mediator complex subunit 13-like [Source:MGI Symbol;Acc:MGI:2670178]
CD4+ memory T	Fyn	4.25433e-16	-0.00315789	0.695	0.711	6.87415e-12	Fyn proto-oncogene [Source:MGI Symbol;Acc:MGI:95602]
CD4+ memory T	Rpl35	4.32426e-16	0.559395	0.903	0.879	6.98713e-12	ribosomal protein L35 [Source:MGI Symbol;Acc:MGI:1913739]
CD4+ memory T	Caprin1	4.37968e-16	-0.0689732	0.44	0.474	7.07669e-12	cell cycle associated protein 1 [Source:MGI Symbol;Acc:MGI:1858234]
CD4+ memory T	Dpf2	4.65816e-16	-0.100308	0.215	0.282	7.52666e-12	D4, zinc and double PHD fingers family 2 [Source:MGI Symbol;Acc:MGI:109529]
CD4+ memory T	Sf1	4.68749e-16	-0.0622201	0.417	0.455	7.57405e-12	splicing factor 1 [Source:MGI Symbol;Acc:MGI:1095403]
CD4+ memory T	Oip5os1	4.76605e-16	-0.0569862	0.468	0.496	7.70098e-12	Opa interacting protein 5, opposite strand 1 [Source:MGI Symbol;Acc:MGI:1913852]
CD4+ memory T	Hnrnpc	5.05085e-16	-0.0651463	0.553	0.575	8.16117e-12	heterogeneous nuclear ribonucleoprotein C [Source:MGI Symbol;Acc:MGI:107795]
CD4+ memory T	Hif1a	5.08872e-16	-0.0516736	0.57	0.598	8.22235e-12	hypoxia inducible factor 1, alpha subunit [Source:MGI Symbol;Acc:MGI:106918]
CD4+ memory T	Dock11	5.19439e-16	-0.0845285	0.326	0.366	8.39309e-12	dedicator of cytokinesis 11 [Source:MGI Symbol;Acc:MGI:1923224]
CD4+ memory T	Syncrip	5.2731e-16	-0.0605785	0.486	0.519	8.52028e-12	synaptotagmin binding, cytoplasmic RNA interacting protein [Source:MGI Symbol;Acc:MGI:1891690]
CD4+ memory T	Ly9	5.30337e-16	-0.0771369	0.333	0.376	8.56918e-12	lymphocyte antigen 9 [Source:MGI Symbol;Acc:MGI:96885]
CD4+ memory T	Aak1	5.32385e-16	-0.067373	0.441	0.464	8.60228e-12	AP2 associated kinase 1 [Source:MGI Symbol;Acc:MGI:1098687]
CD4+ memory T	Khsrp	5.46977e-16	-0.0923449	0.247	0.303	8.83805e-12	KH-type splicing regulatory protein [Source:MGI Symbol;Acc:MGI:1336214]
CD4+ memory T	Plekhb2	5.54827e-16	-0.0979188	0.259	0.313	8.9649e-12	pleckstrin homology domain containing, family B (evectins) member 2 [Source:MGI Symbol;Acc:MGI:2385825]
CD4+ memory T	Fryl	5.62576e-16	-0.0565386	0.523	0.556	9.0901e-12	FRY like transcription coactivator [Source:MGI Symbol;Acc:MGI:1919563]
CD4+ memory T	Zbtb4	5.83652e-16	-0.0911539	0.254	0.308	9.43065e-12	zinc finger and BTB domain containing 4 [Source:MGI Symbol;Acc:MGI:1922830]
CD4+ memory T	Syk	6.56329e-16	-0.24994	0.105	0.217	1.0605e-11	spleen tyrosine kinase [Source:MGI Symbol;Acc:MGI:99515]
CD4+ memory T	Dad1	7.26096e-16	0.382912	0.713	0.568	1.17323e-11	defender against cell death 1 [Source:MGI Symbol;Acc:MGI:101912]
CD4+ memory T	Rps6kb1	8.06256e-16	-0.0884685	0.287	0.325	1.30275e-11	ribosomal protein S6 kinase, polypeptide 1 [Source:MGI Symbol;Acc:MGI:1270849]
CD4+ memory T	Zfp36	8.11523e-16	-0.128121	0.277	0.337	1.31126e-11	zinc finger protein 36 [Source:MGI Symbol;Acc:MGI:99180]
CD4+ memory T	Gimap8	8.1309e-16	-0.0309996	0.594	0.588	1.31379e-11	GTPase, IMAP family member 8 [Source:MGI Symbol;Acc:MGI:2685303]
CD4+ memory T	Irak1	8.1414e-16	-0.0876498	0.288	0.322	1.31549e-11	interleukin-1 receptor-associated kinase 1 [Source:MGI Symbol;Acc:MGI:107420]
CD4+ memory T	Tbc1d10c	8.89802e-16	-0.0430302	0.588	0.597	1.43774e-11	TBC1 domain family, member 10c [Source:MGI Symbol;Acc:MGI:1922072]
CD4+ memory T	Mau2	9.20774e-16	-0.0721278	0.361	0.396	1.48779e-11	MAU2 sister chromatid cohesion factor [Source:MGI Symbol;Acc:MGI:1921799]
CD4+ memory T	Cltc	1.06638e-15	-0.0649882	0.426	0.47	1.72305e-11	clathrin, heavy polypeptide (Hc) [Source:MGI Symbol;Acc:MGI:2388633]
CD4+ memory T	Lasp1	1.17197e-15	-0.091245	0.302	0.337	1.89367e-11	LIM and SH3 protein 1 [Source:MGI Symbol;Acc:MGI:109656]
CD4+ memory T	Sp1	1.30238e-15	-0.0834585	0.296	0.342	2.10439e-11	trans-acting transcription factor 1 [Source:MGI Symbol;Acc:MGI:98372]
CD4+ memory T	Usf2	1.32497e-15	-0.0675883	0.367	0.401	2.14089e-11	upstream transcription factor 2 [Source:MGI Symbol;Acc:MGI:99961]
CD4+ memory T	Atxn2l	1.35223e-15	-0.0570319	0.446	0.488	2.18494e-11	ataxin 2-like [Source:MGI Symbol;Acc:MGI:2446242]
CD4+ memory T	Rpl36	1.35241e-15	0.588007	0.947	0.929	2.18523e-11	ribosomal protein L36 [Source:MGI Symbol;Acc:MGI:1860603]
CD4+ memory T	Trim56	1.35841e-15	-0.0711595	0.43	0.463	2.19491e-11	tripartite motif-containing 56 [Source:MGI Symbol;Acc:MGI:2685298]
CD4+ memory T	Pum1	1.36495e-15	-0.0638969	0.36	0.404	2.20549e-11	pumilio RNA-binding family member 1 [Source:MGI Symbol;Acc:MGI:1931749]
CD4+ memory T	Rpl28	1.4178e-15	0.575665	0.94	0.919	2.29089e-11	ribosomal protein L28 [Source:MGI Symbol;Acc:MGI:101839]
CD4+ memory T	Nedd9	1.48704e-15	-0.0858375	0.297	0.343	2.40277e-11	neural precursor cell expressed, developmentally down-regulated gene 9 [Source:MGI Symbol;Acc:MGI:97302]
CD4+ memory T	Dennd1b	1.5044e-15	-0.0881469	0.314	0.363	2.43082e-11	DENN/MADD domain containing 1B [Source:MGI Symbol;Acc:MGI:2447812]
CD4+ memory T	Rc3h1	1.54719e-15	-0.0823113	0.319	0.359	2.49994e-11	RING CCCH (C3H) domains 1 [Source:MGI Symbol;Acc:MGI:2685397]
CD4+ memory T	Ubl3	1.54891e-15	-0.0652914	0.443	0.492	2.50273e-11	ubiquitin-like 3 [Source:MGI Symbol;Acc:MGI:1344373]
CD4+ memory T	Zbtb7a	1.6422e-15	-0.0643393	0.468	0.494	2.65347e-11	zinc finger and BTB domain containing 7a [Source:MGI Symbol;Acc:MGI:1335091]
CD4+ memory T	Ywhae	1.68639e-15	-0.0654342	0.532	0.564	2.72487e-11	tyrosine 3-monooxygenase/tryptophan 5-monooxygenase activation protein, epsilon polypeptide [Source:MGI Symbol;Acc:MGI:894689]
CD4+ memory T	Hvcn1	1.70385e-15	-0.139551	0.219	0.273	2.75307e-11	hydrogen voltage-gated channel 1 [Source:MGI Symbol;Acc:MGI:1921346]
CD4+ memory T	Kbtbd11	1.77651e-15	-0.0800151	0.409	0.435	2.87048e-11	kelch repeat and BTB (POZ) domain containing 11 [Source:MGI Symbol;Acc:MGI:1922151]
CD4+ memory T	Tent5c	1.80289e-15	-0.10885	0.234	0.297	2.91312e-11	terminal nucleotidyltransferase 5C [Source:MGI Symbol;Acc:MGI:1921895]
CD4+ memory T	Rabgap1l	1.8555e-15	-0.0230588	0.621	0.618	2.99811e-11	RAB GTPase activating protein 1-like [Source:MGI Symbol;Acc:MGI:1352507]
CD4+ memory T	Tmem259	1.89603e-15	-0.0827686	0.268	0.309	3.0636e-11	transmembrane protein 259 [Source:MGI Symbol;Acc:MGI:2177957]
CD4+ memory T	Mga	1.92489e-15	-0.0781617	0.339	0.387	3.11024e-11	MAX gene associated [Source:MGI Symbol;Acc:MGI:1352483]
CD4+ memory T	Arhgap9	1.99671e-15	-0.0669458	0.387	0.427	3.22629e-11	Rho GTPase activating protein 9 [Source:MGI Symbol;Acc:MGI:2143764]
CD4+ memory T	Tspan13	2.01807e-15	-0.0492927	0.549	0.591	3.2608e-11	tetraspanin 13 [Source:MGI Symbol;Acc:MGI:1913359]
CD4+ memory T	Tial1	2.03799e-15	-0.0734057	0.308	0.344	3.29299e-11	Tia1 cytotoxic granule-associated RNA binding protein-like 1 [Source:MGI Symbol;Acc:MGI:107913]
CD4+ memory T	Gmip	2.25515e-15	-0.0704863	0.308	0.349	3.64387e-11	Gem-interacting protein [Source:MGI Symbol;Acc:MGI:1926066]
CD4+ memory T	Ss18	2.42286e-15	-0.0990829	0.226	0.28	3.91486e-11	SS18, nBAF chromatin remodeling complex subunit [Source:MGI Symbol;Acc:MGI:107708]
CD4+ memory T	Tm9sf3	2.70199e-15	-0.0343378	0.601	0.602	4.36588e-11	transmembrane 9 superfamily member 3 [Source:MGI Symbol;Acc:MGI:1914262]
CD4+ memory T	Cd164	2.70564e-15	-0.0737644	0.36	0.398	4.37177e-11	CD164 antigen [Source:MGI Symbol;Acc:MGI:1859568]
CD4+ memory T	Ube2h	2.79417e-15	-0.0707887	0.369	0.399	4.51482e-11	ubiquitin-conjugating enzyme E2H [Source:MGI Symbol;Acc:MGI:104632]
CD4+ memory T	Cdc73	2.89673e-15	-0.0878777	0.258	0.318	4.68053e-11	cell division cycle 73, Paf1/RNA polymerase II complex component [Source:MGI Symbol;Acc:MGI:2384876]
CD4+ memory T	Iqgap1	2.98648e-15	-0.0347115	0.763	0.759	4.82555e-11	IQ motif containing GTPase activating protein 1 [Source:MGI Symbol;Acc:MGI:1352757]
CD4+ memory T	Cd72	3.00512e-15	-0.227019	0.102	0.214	4.85568e-11	CD72 antigen [Source:MGI Symbol;Acc:MGI:88345]
CD4+ memory T	Ssh2	3.02104e-15	-0.0532577	0.476	0.487	4.88139e-11	slingshot protein phosphatase 2 [Source:MGI Symbol;Acc:MGI:2679255]
CD4+ memory T	Tmcc1	3.07863e-15	-0.0906781	0.274	0.33	4.97445e-11	transmembrane and coiled coil domains 1 [Source:MGI Symbol;Acc:MGI:2442368]
CD4+ memory T	Cd22	3.11514e-15	-0.234413	0.128	0.221	5.03344e-11	CD22 antigen [Source:MGI Symbol;Acc:MGI:88322]
CD4+ memory T	Mark2	3.50652e-15	-0.0599743	0.459	0.481	5.66584e-11	MAP/microtubule affinity regulating kinase 2 [Source:MGI Symbol;Acc:MGI:99638]
CD4+ memory T	Pik3r1	3.52667e-15	-0.080156	0.356	0.399	5.69839e-11	phosphoinositide-3-kinase regulatory subunit 1 [Source:MGI Symbol;Acc:MGI:97583]
CD4+ memory T	Arhgap4	3.56988e-15	-0.0680911	0.374	0.419	5.76821e-11	Rho GTPase activating protein 4 [Source:MGI Symbol;Acc:MGI:2159577]
CD4+ memory T	Rfx7	4.2288e-15	-0.079794	0.328	0.364	6.8329e-11	regulatory factor X, 7 [Source:MGI Symbol;Acc:MGI:2442675]
CD4+ memory T	Elavl1	4.30231e-15	-0.0678192	0.333	0.374	6.95168e-11	ELAV (embryonic lethal, abnormal vision)-like 1 (Hu antigen R) [Source:MGI Symbol;Acc:MGI:1100851]
CD4+ memory T	Il21r	4.39625e-15	-0.0658238	0.359	0.391	7.10346e-11	interleukin 21 receptor [Source:MGI Symbol;Acc:MGI:1890475]
CD4+ memory T	Rab14	4.63756e-15	-0.0381228	0.577	0.582	7.49337e-11	RAB14, member RAS oncogene family [Source:MGI Symbol;Acc:MGI:1915615]
CD4+ memory T	Cxcr4	5.07566e-15	-0.101661	0.256	0.306	8.20125e-11	chemokine (C-X-C motif) receptor 4 [Source:MGI Symbol;Acc:MGI:109563]
CD4+ memory T	Mob4	5.9014e-15	-0.0686124	0.311	0.343	9.53549e-11	MOB family member 4, phocein [Source:MGI Symbol;Acc:MGI:104899]
CD4+ memory T	Rc3h2	5.97077e-15	-0.0629848	0.43	0.455	9.64757e-11	ring finger and CCCH-type zinc finger domains 2 [Source:MGI Symbol;Acc:MGI:2442789]
CD4+ memory T	Tnpo3	6.0745e-15	-0.066135	0.332	0.371	9.81517e-11	transportin 3 [Source:MGI Symbol;Acc:MGI:1196412]
CD4+ memory T	Tnfrsf4	6.19491e-15	0.528297	0.536	0.396	1.00097e-10	tumor necrosis factor receptor superfamily, member 4 [Source:MGI Symbol;Acc:MGI:104512]
CD4+ memory T	2900097C17Rik	6.20799e-15	-0.0880694	0.256	0.31	1.00309e-10	NA
CD4+ memory T	Zfp445	6.48846e-15	-0.0682834	0.344	0.377	1.04841e-10	zinc finger protein 445 [Source:MGI Symbol;Acc:MGI:2143340]
CD4+ memory T	Ddi2	6.56079e-15	-0.0934722	0.234	0.288	1.06009e-10	DNA-damage inducible protein 2 [Source:MGI Symbol;Acc:MGI:1917244]
CD4+ memory T	Ndufa13	6.65217e-15	0.407516	0.742	0.587	1.07486e-10	NADH:ubiquinone oxidoreductase subunit A13 [Source:MGI Symbol;Acc:MGI:1914434]
CD4+ memory T	Mef2c	7.00999e-15	-0.349911	0.116	0.195	1.13267e-10	myocyte enhancer factor 2C [Source:MGI Symbol;Acc:MGI:99458]
CD4+ memory T	Maz	7.0949e-15	-0.0496201	0.48	0.496	1.14639e-10	MYC-associated zinc finger protein (purine-binding transcription factor) [Source:MGI Symbol;Acc:MGI:1338823]
CD4+ memory T	Zc3hav1	7.21994e-15	-0.0485593	0.552	0.563	1.1666e-10	zinc finger CCCH type, antiviral 1 [Source:MGI Symbol;Acc:MGI:1926031]
CD4+ memory T	Rnaset2b	7.31185e-15	0.356744	0.437	0.298	1.18145e-10	ribonuclease T2B [Source:MGI Symbol;Acc:MGI:3702087]
CD4+ memory T	Eif3h	7.36507e-15	0.406225	0.654	0.543	1.19005e-10	eukaryotic translation initiation factor 3, subunit H [Source:MGI Symbol;Acc:MGI:1915385]
CD4+ memory T	Arcn1	7.80177e-15	-0.0687128	0.348	0.382	1.26061e-10	archain 1 [Source:MGI Symbol;Acc:MGI:2387591]
CD4+ memory T	Gpx4	8.21257e-15	0.378878	0.597	0.491	1.32699e-10	glutathione peroxidase 4 [Source:MGI Symbol;Acc:MGI:104767]
CD4+ memory T	Gigyf1	8.36547e-15	-0.0597024	0.362	0.381	1.35169e-10	GRB10 interacting GYF protein 1 [Source:MGI Symbol;Acc:MGI:1888677]
CD4+ memory T	Trip12	8.4443e-15	-0.0285376	0.536	0.554	1.36443e-10	thyroid hormone receptor interactor 12 [Source:MGI Symbol;Acc:MGI:1309481]
CD4+ memory T	Pan3	8.55165e-15	-0.0557241	0.393	0.427	1.38177e-10	PAN3 poly(A) specific ribonuclease subunit [Source:MGI Symbol;Acc:MGI:1919837]
CD4+ memory T	Glg1	8.74752e-15	-0.0578089	0.41	0.438	1.41342e-10	golgi apparatus protein 1 [Source:MGI Symbol;Acc:MGI:104967]
CD4+ memory T	Fam120a	8.9477e-15	-0.0637853	0.346	0.382	1.44577e-10	family with sequence similarity 120, member A [Source:MGI Symbol;Acc:MGI:2446163]
CD4+ memory T	Edf1	9.36668e-15	0.369125	0.554	0.417	1.51347e-10	endothelial differentiation-related factor 1 [Source:MGI Symbol;Acc:MGI:1891227]
CD4+ memory T	Ikzf2	9.49184e-15	-0.0653936	0.801	0.797	1.53369e-10	IKAROS family zinc finger 2 [Source:MGI Symbol;Acc:MGI:1342541]
CD4+ memory T	Tasor2	9.7524e-15	-0.0735032	0.304	0.344	1.57579e-10	transcription activation suppressor family member 2 [Source:MGI Symbol;Acc:MGI:2145274]
CD4+ memory T	Selenot	1.07562e-14	-0.0828757	0.316	0.357	1.73798e-10	selenoprotein T [Source:MGI Symbol;Acc:MGI:1916477]
CD4+ memory T	Mdm4	1.09628e-14	-0.0442369	0.424	0.444	1.77136e-10	transformed mouse 3T3 cell double minute 4 [Source:MGI Symbol;Acc:MGI:107934]
CD4+ memory T	Tnfrsf1b	1.10653e-14	-0.0956373	0.305	0.339	1.78792e-10	tumor necrosis factor receptor superfamily, member 1b [Source:MGI Symbol;Acc:MGI:1314883]
CD4+ memory T	Cnot1	1.37558e-14	-0.0479635	0.442	0.464	2.22267e-10	CCR4-NOT transcription complex, subunit 1 [Source:MGI Symbol;Acc:MGI:2442402]
CD4+ memory T	Ptpn22	1.38222e-14	-0.0215086	0.572	0.592	2.23339e-10	protein tyrosine phosphatase, non-receptor type 22 (lymphoid) [Source:MGI Symbol;Acc:MGI:107170]
CD4+ memory T	Twsg1	1.47024e-14	-0.136565	0.179	0.249	2.37561e-10	twisted gastrulation BMP signaling modulator 1 [Source:MGI Symbol;Acc:MGI:2137520]
CD4+ memory T	Usp25	1.50683e-14	-0.0660174	0.368	0.402	2.43474e-10	ubiquitin specific peptidase 25 [Source:MGI Symbol;Acc:MGI:1353655]
CD4+ memory T	Arpc3	1.51477e-14	0.374736	0.62	0.493	2.44757e-10	actin related protein 2/3 complex, subunit 3 [Source:MGI Symbol;Acc:MGI:1928375]
CD4+ memory T	Lrmp	1.62693e-14	-0.0851811	0.28	0.318	2.62879e-10	lymphoid-restricted membrane protein [Source:MGI Symbol;Acc:MGI:108424]
CD4+ memory T	Runx3	1.67554e-14	-0.116673	0.244	0.299	2.70734e-10	runt related transcription factor 3 [Source:MGI Symbol;Acc:MGI:102672]
CD4+ memory T	Heg1	1.72358e-14	-0.0975335	0.228	0.276	2.78497e-10	heart development protein with EGF-like domains 1 [Source:MGI Symbol;Acc:MGI:1924696]
CD4+ memory T	Arhgap17	1.77691e-14	-0.109639	0.232	0.276	2.87112e-10	Rho GTPase activating protein 17 [Source:MGI Symbol;Acc:MGI:1917747]
CD4+ memory T	Galnt1	1.93498e-14	-0.0739147	0.324	0.364	3.12654e-10	polypeptide N-acetylgalactosaminyltransferase 1 [Source:MGI Symbol;Acc:MGI:894693]
CD4+ memory T	Rbms1	1.9591e-14	-0.0733429	0.385	0.409	3.16551e-10	RNA binding motif, single stranded interacting protein 1 [Source:MGI Symbol;Acc:MGI:1861774]
CD4+ memory T	Uba1	2.04283e-14	-0.0666129	0.367	0.409	3.30081e-10	ubiquitin-like modifier activating enzyme 1 [Source:MGI Symbol;Acc:MGI:98890]
CD4+ memory T	Adam10	2.29265e-14	-0.0653881	0.343	0.392	3.70446e-10	a disintegrin and metallopeptidase domain 10 [Source:MGI Symbol;Acc:MGI:109548]
CD4+ memory T	Rpl14	2.45885e-14	0.535866	0.913	0.876	3.973e-10	ribosomal protein L14 [Source:MGI Symbol;Acc:MGI:1914365]
CD4+ memory T	Arhgef2	2.63128e-14	-0.0716934	0.309	0.351	4.25162e-10	rho/rac guanine nucleotide exchange factor (GEF) 2 [Source:MGI Symbol;Acc:MGI:103264]
CD4+ memory T	Atp5a1	2.71466e-14	-0.0279749	0.676	0.679	4.38634e-10	ATP synthase, H+ transporting, mitochondrial F1 complex, alpha subunit 1 [Source:MGI Symbol;Acc:MGI:88115]
CD4+ memory T	G3bp2	2.74572e-14	-0.0416565	0.505	0.532	4.43654e-10	GTPase activating protein (SH3 domain) binding protein 2 [Source:MGI Symbol;Acc:MGI:2442040]
CD4+ memory T	Pip4k2a	2.7904e-14	-0.0803767	0.294	0.337	4.50874e-10	phosphatidylinositol-5-phosphate 4-kinase, type II, alpha [Source:MGI Symbol;Acc:MGI:1298206]
CD4+ memory T	Bclaf1	2.89511e-14	0.00555586	0.696	0.696	4.67791e-10	BCL2-associated transcription factor 1 [Source:MGI Symbol;Acc:MGI:1917580]
CD4+ memory T	Arih1	3.06669e-14	-0.0543148	0.356	0.387	4.95515e-10	ariadne RBR E3 ubiquitin protein ligase 1 [Source:MGI Symbol;Acc:MGI:1344363]
CD4+ memory T	Ppp4r2	3.13265e-14	-0.0554934	0.393	0.413	5.06173e-10	protein phosphatase 4, regulatory subunit 2 [Source:MGI Symbol;Acc:MGI:3027896]
CD4+ memory T	Prkacb	3.19102e-14	-0.0585745	0.376	0.405	5.15605e-10	protein kinase, cAMP dependent, catalytic, beta [Source:MGI Symbol;Acc:MGI:97594]
CD4+ memory T	Pfn1	3.45289e-14	0.512382	0.932	0.922	5.57918e-10	profilin 1 [Source:MGI Symbol;Acc:MGI:97549]
CD4+ memory T	Brd4	3.55883e-14	-0.0478298	0.479	0.489	5.75036e-10	bromodomain containing 4 [Source:MGI Symbol;Acc:MGI:1888520]
CD4+ memory T	Plekho1	3.5692e-14	-0.116596	0.199	0.258	5.76711e-10	pleckstrin homology domain containing, family O member 1 [Source:MGI Symbol;Acc:MGI:1914470]
CD4+ memory T	Lims1	4.00272e-14	-0.0537754	0.374	0.4	6.46759e-10	LIM and senescent cell antigen-like domains 1 [Source:MGI Symbol;Acc:MGI:1195263]
CD4+ memory T	Srsf3	4.19686e-14	-0.0300608	0.695	0.725	6.78128e-10	serine and arginine-rich splicing factor 3 [Source:MGI Symbol;Acc:MGI:98285]
CD4+ memory T	Irf2bpl	4.22418e-14	-0.079835	0.289	0.333	6.82543e-10	interferon regulatory factor 2 binding protein-like [Source:MGI Symbol;Acc:MGI:2442463]
CD4+ memory T	Macf1	4.33361e-14	-0.00967211	0.741	0.77	7.00225e-10	microtubule-actin crosslinking factor 1 [Source:MGI Symbol;Acc:MGI:108559]
CD4+ memory T	Uhrf2	4.33909e-14	-0.0525367	0.396	0.427	7.0111e-10	ubiquitin-like, containing PHD and RING finger domains 2 [Source:MGI Symbol;Acc:MGI:1923718]
CD4+ memory T	Zmym5	4.42587e-14	-0.0490505	0.413	0.427	7.15132e-10	zinc finger, MYM-type 5 [Source:MGI Symbol;Acc:MGI:3041170]
CD4+ memory T	Psd4	4.47008e-14	-0.0692822	0.283	0.322	7.22275e-10	pleckstrin and Sec7 domain containing 4 [Source:MGI Symbol;Acc:MGI:2674093]
CD4+ memory T	Atp5d	4.56505e-14	0.354903	0.587	0.46	7.37621e-10	ATP synthase, H+ transporting, mitochondrial F1 complex, delta subunit [Source:MGI Symbol;Acc:MGI:1913293]
CD4+ memory T	Rps2	4.75178e-14	0.604241	0.926	0.893	7.67793e-10	ribosomal protein S2 [Source:MGI Symbol;Acc:MGI:105110]
CD4+ memory T	Arhgef1	4.82567e-14	0.00973508	0.799	0.795	7.79732e-10	Rho guanine nucleotide exchange factor (GEF) 1 [Source:MGI Symbol;Acc:MGI:1353510]
CD4+ memory T	Khnyn	4.93283e-14	-0.097135	0.199	0.263	7.97046e-10	KH and NYN domain containing [Source:MGI Symbol;Acc:MGI:2451333]
CD4+ memory T	Swap70	4.9431e-14	-0.193457	0.151	0.225	7.98707e-10	SWA-70 protein [Source:MGI Symbol;Acc:MGI:1298390]
CD4+ memory T	G3bp1	5.11684e-14	-0.0529222	0.495	0.524	8.26779e-10	GTPase activating protein (SH3 domain) binding protein 1 [Source:MGI Symbol;Acc:MGI:1351465]
CD4+ memory T	Herc4	5.17966e-14	-0.0706844	0.278	0.321	8.36929e-10	hect domain and RLD 4 [Source:MGI Symbol;Acc:MGI:1914595]
CD4+ memory T	Map3k1	5.18447e-14	-0.0729807	0.307	0.345	8.37706e-10	mitogen-activated protein kinase kinase kinase 1 [Source:MGI Symbol;Acc:MGI:1346872]
CD4+ memory T	Epn1	6.05563e-14	-0.0791596	0.253	0.306	9.78469e-10	epsin 1 [Source:MGI Symbol;Acc:MGI:1333763]
CD4+ memory T	Trpc4ap	6.11833e-14	-0.0654141	0.338	0.359	9.886e-10	transient receptor potential cation channel, subfamily C, member 4 associated protein [Source:MGI Symbol;Acc:MGI:1930751]
CD4+ memory T	Dgkd	6.35695e-14	-0.107998	0.209	0.266	1.02716e-09	diacylglycerol kinase, delta [Source:MGI Symbol;Acc:MGI:2138334]
CD4+ memory T	Trim28	6.40569e-14	-0.0998984	0.198	0.259	1.03503e-09	tripartite motif-containing 28 [Source:MGI Symbol;Acc:MGI:109274]
CD4+ memory T	Csnk1a1	6.43768e-14	0.0128284	0.709	0.723	1.0402e-09	casein kinase 1, alpha 1 [Source:MGI Symbol;Acc:MGI:1934950]
CD4+ memory T	Fxyd5	6.46425e-14	0.467488	0.877	0.807	1.04449e-09	FXYD domain-containing ion transport regulator 5 [Source:MGI Symbol;Acc:MGI:1201785]
CD4+ memory T	Abce1	6.69494e-14	-0.0947388	0.22	0.277	1.08177e-09	ATP-binding cassette, sub-family E (OABP), member 1 [Source:MGI Symbol;Acc:MGI:1195458]
CD4+ memory T	Dock8	6.71207e-14	-0.0214953	0.601	0.607	1.08454e-09	dedicator of cytokinesis 8 [Source:MGI Symbol;Acc:MGI:1921396]
CD4+ memory T	Mtpn	6.91338e-14	-0.0873524	0.289	0.329	1.11706e-09	myotrophin [Source:MGI Symbol;Acc:MGI:99445]
CD4+ memory T	Acap1	6.92015e-14	-0.060874	0.337	0.39	1.11816e-09	ArfGAP with coiled-coil, ankyrin repeat and PH domains 1 [Source:MGI Symbol;Acc:MGI:2388270]
CD4+ memory T	Map3k2	7.25796e-14	-0.087729	0.226	0.277	1.17274e-09	mitogen-activated protein kinase kinase kinase 2 [Source:MGI Symbol;Acc:MGI:1346873]
CD4+ memory T	Hnrnpul2	7.28032e-14	-0.0350851	0.535	0.559	1.17635e-09	heterogeneous nuclear ribonucleoprotein U-like 2 [Source:MGI Symbol;Acc:MGI:1915943]
CD4+ memory T	Sla	7.5865e-14	-0.056931	0.445	0.477	1.22583e-09	src-like adaptor [Source:MGI Symbol;Acc:MGI:104295]
CD4+ memory T	Cnn2	7.78317e-14	-0.0391153	0.73	0.742	1.25761e-09	calponin 2 [Source:MGI Symbol;Acc:MGI:105093]
CD4+ memory T	Ddx39b	7.97815e-14	-0.0422027	0.472	0.495	1.28911e-09	DEAD box helicase 39b [Source:MGI Symbol;Acc:MGI:99240]
CD4+ memory T	Ndufa7	8.28537e-14	0.336359	0.558	0.417	1.33875e-09	NADH:ubiquinone oxidoreductase subunit A7 [Source:MGI Symbol;Acc:MGI:1913666]
CD4+ memory T	Zfp148	8.37229e-14	-0.0588349	0.373	0.41	1.35279e-09	zinc finger protein 148 [Source:MGI Symbol;Acc:MGI:1332234]
CD4+ memory T	Cds2	8.4745e-14	-0.0794736	0.245	0.296	1.36931e-09	CDP-diacylglycerol synthase (phosphatidate cytidylyltransferase) 2 [Source:MGI Symbol;Acc:MGI:1332236]
CD4+ memory T	Efr3a	9.05441e-14	-0.0731132	0.308	0.347	1.46301e-09	EFR3 homolog A [Source:MGI Symbol;Acc:MGI:1923990]
CD4+ memory T	Ppp4r3b	9.66234e-14	-0.0385666	0.488	0.505	1.56124e-09	protein phosphatase 4 regulatory subunit 3B [Source:MGI Symbol;Acc:MGI:2144474]
CD4+ memory T	Eif4ebp2	9.73715e-14	-0.0492426	0.445	0.487	1.57333e-09	eukaryotic translation initiation factor 4E binding protein 2 [Source:MGI Symbol;Acc:MGI:109198]
CD4+ memory T	Sypl	9.95064e-14	-0.0991643	0.25	0.28	1.60783e-09	synaptophysin-like protein [Source:MGI Symbol;Acc:MGI:108081]
CD4+ memory T	Gpr174	1.01814e-13	-0.0640367	0.354	0.383	1.6451e-09	G protein-coupled receptor 174 [Source:MGI Symbol;Acc:MGI:2685222]
CD4+ memory T	Azin1	1.08009e-13	-0.0919728	0.231	0.276	1.74522e-09	antizyme inhibitor 1 [Source:MGI Symbol;Acc:MGI:1859169]
CD4+ memory T	Man2a1	1.08798e-13	-0.0743807	0.298	0.338	1.75795e-09	mannosidase 2, alpha 1 [Source:MGI Symbol;Acc:MGI:104669]
CD4+ memory T	Ppp4r3a	1.17675e-13	-0.046965	0.403	0.435	1.9014e-09	protein phosphatase 4 regulatory subunit 3A [Source:MGI Symbol;Acc:MGI:1915984]
CD4+ memory T	9930111J21Rik2	1.19511e-13	-0.0186564	0.64	0.652	1.93106e-09	RIKEN cDNA 9930111J21 gene 2 [Source:MGI Symbol;Acc:MGI:3711310]
CD4+ memory T	Sorl1	1.23676e-13	-0.0771826	0.366	0.388	1.99835e-09	sortilin-related receptor, LDLR class A repeats-containing [Source:MGI Symbol;Acc:MGI:1202296]
CD4+ memory T	Ost4	1.23777e-13	0.350043	0.558	0.413	1.99998e-09	oligosaccharyltransferase complex subunit 4 (non-catalytic) [Source:MGI Symbol;Acc:MGI:1914945]
CD4+ memory T	Rsf1	1.28336e-13	-0.0459714	0.43	0.463	2.07365e-09	remodeling and spacing factor 1 [Source:MGI Symbol;Acc:MGI:2682305]
CD4+ memory T	Arf3	1.31962e-13	-0.0596374	0.311	0.356	2.13224e-09	ADP-ribosylation factor 3 [Source:MGI Symbol;Acc:MGI:99432]
CD4+ memory T	mt-Nd1	1.34898e-13	0.0763346	0.989	0.991	2.17969e-09	mitochondrially encoded NADH dehydrogenase 1 [Source:MGI Symbol;Acc:MGI:101787]
CD4+ memory T	Tapbp	1.37995e-13	-0.0277055	0.683	0.664	2.22972e-09	TAP binding protein [Source:MGI Symbol;Acc:MGI:1201689]
CD4+ memory T	Cyld	1.38125e-13	-0.026235	0.543	0.561	2.23182e-09	CYLD lysine 63 deubiquitinase [Source:MGI Symbol;Acc:MGI:1921506]
CD4+ memory T	Ptp4a2	1.40757e-13	0.00164737	0.796	0.814	2.27435e-09	protein tyrosine phosphatase 4a2 [Source:MGI Symbol;Acc:MGI:1277117]
CD4+ memory T	Itpr2	1.41441e-13	-0.0444286	0.479	0.493	2.2854e-09	inositol 1,4,5-triphosphate receptor 2 [Source:MGI Symbol;Acc:MGI:99418]
CD4+ memory T	Scamp3	1.41605e-13	-0.0610625	0.361	0.387	2.28805e-09	secretory carrier membrane protein 3 [Source:MGI Symbol;Acc:MGI:1346346]
CD4+ memory T	Madd	1.45924e-13	-0.0413495	0.45	0.479	2.35784e-09	MAP-kinase activating death domain [Source:MGI Symbol;Acc:MGI:2444672]
CD4+ memory T	S100a4	1.47796e-13	0.788504	0.474	0.351	2.38809e-09	S100 calcium binding protein A4 [Source:MGI Symbol;Acc:MGI:1330282]
CD4+ memory T	Fkbp4	1.49163e-13	-0.0965131	0.208	0.262	2.41018e-09	FK506 binding protein 4 [Source:MGI Symbol;Acc:MGI:95543]
CD4+ memory T	Naca	1.51544e-13	0.503682	0.859	0.824	2.44865e-09	nascent polypeptide-associated complex alpha polypeptide [Source:MGI Symbol;Acc:MGI:106095]
CD4+ memory T	U2af2	1.56452e-13	-0.0560556	0.379	0.414	2.52796e-09	U2 small nuclear ribonucleoprotein auxiliary factor (U2AF) 2 [Source:MGI Symbol;Acc:MGI:98886]
CD4+ memory T	Zfp280d	1.75772e-13	-0.0625823	0.292	0.325	2.84012e-09	zinc finger protein 280D [Source:MGI Symbol;Acc:MGI:2384583]
CD4+ memory T	Papola	1.80595e-13	-0.0543897	0.455	0.48	2.91805e-09	poly (A) polymerase alpha [Source:MGI Symbol;Acc:MGI:109301]
CD4+ memory T	Ankrd17	1.80851e-13	-0.0310397	0.519	0.545	2.92219e-09	ankyrin repeat domain 17 [Source:MGI Symbol;Acc:MGI:1932101]
CD4+ memory T	Ccdc50	1.94884e-13	-0.0690477	0.431	0.443	3.14894e-09	coiled-coil domain containing 50 [Source:MGI Symbol;Acc:MGI:1914751]
CD4+ memory T	Inpp5d	1.95199e-13	-0.0620497	0.308	0.344	3.15403e-09	inositol polyphosphate-5-phosphatase D [Source:MGI Symbol;Acc:MGI:107357]
CD4+ memory T	Zdhhc20	1.96508e-13	-0.0560854	0.458	0.498	3.17517e-09	zinc finger, DHHC domain containing 20 [Source:MGI Symbol;Acc:MGI:1923215]
CD4+ memory T	Arhgap25	2.03278e-13	-0.0700079	0.301	0.337	3.28457e-09	Rho GTPase activating protein 25 [Source:MGI Symbol;Acc:MGI:2443687]
CD4+ memory T	Fam49b	2.06222e-13	-0.0349022	0.563	0.563	3.33213e-09	NA
CD4+ memory T	Rps12	2.16976e-13	0.0220737	0.969	0.98	3.50589e-09	ribosomal protein S12 [Source:MGI Symbol;Acc:MGI:98105]
CD4+ memory T	Rprd2	2.17171e-13	-0.0511811	0.325	0.365	3.50905e-09	regulation of nuclear pre-mRNA domain containing 2 [Source:MGI Symbol;Acc:MGI:1922387]
CD4+ memory T	Ifi27	2.22329e-13	0.339532	0.443	0.28	3.5924e-09	interferon, alpha-inducible protein 27 [Source:MGI Symbol;Acc:MGI:1277180]
CD4+ memory T	mt-Atp8	2.29223e-13	-0.0458054	0.413	0.426	3.70379e-09	mitochondrially encoded ATP synthase 8 [Source:MGI Symbol;Acc:MGI:99926]
CD4+ memory T	Rps6ka3	2.69175e-13	-0.0838113	0.26	0.312	4.34933e-09	ribosomal protein S6 kinase polypeptide 3 [Source:MGI Symbol;Acc:MGI:104557]
CD4+ memory T	Cbx6	2.70557e-13	-0.067147	0.331	0.35	4.37167e-09	chromobox 6 [Source:MGI Symbol;Acc:MGI:3512628]
CD4+ memory T	Rsrc2	2.82985e-13	-0.00986325	0.611	0.613	4.57247e-09	arginine/serine-rich coiled-coil 2 [Source:MGI Symbol;Acc:MGI:1913489]
CD4+ memory T	Chtop	2.879e-13	-0.0566614	0.35	0.385	4.65189e-09	chromatin target of PRMT1 [Source:MGI Symbol;Acc:MGI:1913761]
CD4+ memory T	Adcy7	3.01826e-13	-0.0449868	0.46	0.471	4.87691e-09	adenylate cyclase 7 [Source:MGI Symbol;Acc:MGI:102891]
CD4+ memory T	Canx	3.0639e-13	-0.0657327	0.501	0.518	4.95065e-09	calnexin [Source:MGI Symbol;Acc:MGI:88261]
CD4+ memory T	Edem1	3.09242e-13	-0.0788475	0.236	0.29	4.99673e-09	ER degradation enhancer, mannosidase alpha-like 1 [Source:MGI Symbol;Acc:MGI:2180139]
CD4+ memory T	Sp100	3.13396e-13	-0.0230478	0.699	0.698	5.06385e-09	nuclear antigen Sp100 [Source:MGI Symbol;Acc:MGI:109561]
CD4+ memory T	Sp3	3.20265e-13	-0.0439707	0.416	0.429	5.17484e-09	trans-acting transcription factor 3 [Source:MGI Symbol;Acc:MGI:1277166]
CD4+ memory T	Faah	3.35104e-13	-0.0489685	0.455	0.479	5.41461e-09	fatty acid amide hydrolase [Source:MGI Symbol;Acc:MGI:109609]
CD4+ memory T	A630001G21Rik	3.44984e-13	-0.0920061	0.212	0.263	5.57425e-09	RIKEN cDNA A630001G21 gene [Source:MGI Symbol;Acc:MGI:2443131]
CD4+ memory T	Bcl2a1b	3.50543e-13	0.419903	0.46	0.321	5.66407e-09	B cell leukemia/lymphoma 2 related protein A1b [Source:MGI Symbol;Acc:MGI:1278326]
CD4+ memory T	Synj2bp	3.60513e-13	-0.059405	0.317	0.341	5.82517e-09	synaptojanin 2 binding protein [Source:MGI Symbol;Acc:MGI:1344347]
CD4+ memory T	Tut7	3.62881e-13	-0.0366286	0.524	0.523	5.86343e-09	terminal uridylyl transferase 7 [Source:MGI Symbol;Acc:MGI:2387179]
CD4+ memory T	P2ry10	4.52433e-13	-0.104782	0.203	0.269	7.31041e-09	purinergic receptor P2Y, G-protein coupled 10 [Source:MGI Symbol;Acc:MGI:1926076]
CD4+ memory T	Ppp1r18	4.71577e-13	-0.0182735	0.576	0.594	7.61974e-09	protein phosphatase 1, regulatory subunit 18 [Source:MGI Symbol;Acc:MGI:1923698]
CD4+ memory T	Araf	4.80883e-13	-0.0578832	0.306	0.329	7.77011e-09	Araf proto-oncogene, serine/threonine kinase [Source:MGI Symbol;Acc:MGI:88065]
CD4+ memory T	Ppp3r1	5.11482e-13	-0.0822131	0.221	0.269	8.26453e-09	protein phosphatase 3, regulatory subunit B, alpha isoform (calcineurin B, type I) [Source:MGI Symbol;Acc:MGI:107172]
CD4+ memory T	Itm2c	5.19823e-13	-0.017589	0.562	0.579	8.3993e-09	integral membrane protein 2C [Source:MGI Symbol;Acc:MGI:1927594]
CD4+ memory T	Rpl8	5.90503e-13	0.531033	0.952	0.95	9.54135e-09	ribosomal protein L8 [Source:MGI Symbol;Acc:MGI:1350927]
CD4+ memory T	Chd4	5.95522e-13	-0.00547391	0.705	0.699	9.62245e-09	chromodomain helicase DNA binding protein 4 [Source:MGI Symbol;Acc:MGI:1344380]
CD4+ memory T	Ube2d2a	6.95961e-13	-0.0205521	0.574	0.582	1.12453e-08	ubiquitin-conjugating enzyme E2D 2A [Source:MGI Symbol;Acc:MGI:1930715]
CD4+ memory T	Prkcd	7.24612e-13	-0.107271	0.186	0.242	1.17083e-08	protein kinase C, delta [Source:MGI Symbol;Acc:MGI:97598]
CD4+ memory T	Vcp	7.48598e-13	-0.031744	0.519	0.541	1.20958e-08	valosin containing protein [Source:MGI Symbol;Acc:MGI:99919]
CD4+ memory T	Hnrnpr	7.67836e-13	-0.0203207	0.561	0.565	1.24067e-08	heterogeneous nuclear ribonucleoprotein R [Source:MGI Symbol;Acc:MGI:1891692]
CD4+ memory T	Nfkbia	8.10662e-13	0.475932	0.632	0.543	1.30987e-08	nuclear factor of kappa light polypeptide gene enhancer in B cells inhibitor, alpha [Source:MGI Symbol;Acc:MGI:104741]
CD4+ memory T	Fam168b	8.69427e-13	-0.0466528	0.374	0.401	1.40482e-08	family with sequence similarity 168, member B [Source:MGI Symbol;Acc:MGI:2448487]
CD4+ memory T	Ptk2b	8.78315e-13	-0.0516101	0.332	0.373	1.41918e-08	PTK2 protein tyrosine kinase 2 beta [Source:MGI Symbol;Acc:MGI:104908]
CD4+ memory T	Ganab	9.02711e-13	-0.0668352	0.25	0.283	1.4586e-08	alpha glucosidase 2 alpha neutral subunit [Source:MGI Symbol;Acc:MGI:1097667]
CD4+ memory T	Dhx15	9.21501e-13	-0.0383357	0.455	0.48	1.48896e-08	DEAH (Asp-Glu-Ala-His) box polypeptide 15 [Source:MGI Symbol;Acc:MGI:1099786]
CD4+ memory T	Ccng1	9.88215e-13	-0.0738116	0.262	0.294	1.59676e-08	cyclin G1 [Source:MGI Symbol;Acc:MGI:102890]
CD4+ memory T	Cpsf7	9.89031e-13	-0.0600206	0.285	0.317	1.59808e-08	cleavage and polyadenylation specific factor 7 [Source:MGI Symbol;Acc:MGI:1917826]
CD4+ memory T	Satb1	1.01321e-12	-0.182735	0.194	0.254	1.63714e-08	special AT-rich sequence binding protein 1 [Source:MGI Symbol;Acc:MGI:105084]
CD4+ memory T	Rnf20	1.06413e-12	-0.0684475	0.259	0.302	1.71942e-08	ring finger protein 20 [Source:MGI Symbol;Acc:MGI:1925927]
CD4+ memory T	Zfp451	1.06903e-12	-0.0861996	0.208	0.251	1.72734e-08	zinc finger protein 451 [Source:MGI Symbol;Acc:MGI:2137896]
CD4+ memory T	Kif5b	1.11524e-12	-0.0131148	0.61	0.62	1.80201e-08	kinesin family member 5B [Source:MGI Symbol;Acc:MGI:1098268]
CD4+ memory T	Xbp1	1.13707e-12	-0.0822697	0.239	0.276	1.83728e-08	X-box binding protein 1 [Source:MGI Symbol;Acc:MGI:98970]
CD4+ memory T	Il17ra	1.19885e-12	-0.07068	0.298	0.332	1.9371e-08	interleukin 17 receptor A [Source:MGI Symbol;Acc:MGI:107399]
CD4+ memory T	Rplp2	1.20359e-12	0.0980432	0.978	0.988	1.94476e-08	ribosomal protein, large P2 [Source:MGI Symbol;Acc:MGI:1914436]
CD4+ memory T	Nup210	1.32332e-12	-0.0642073	0.281	0.322	2.13823e-08	nucleoporin 210 [Source:MGI Symbol;Acc:MGI:1859555]
CD4+ memory T	AI504432	1.32415e-12	-0.0662074	0.34	0.38	2.13956e-08	expressed sequence AI504432 [Source:MGI Symbol;Acc:MGI:2139742]
CD4+ memory T	Setd7	1.35359e-12	-0.0814278	0.225	0.268	2.18713e-08	SET domain containing (lysine methyltransferase) 7 [Source:MGI Symbol;Acc:MGI:1920501]
CD4+ memory T	Samhd1	1.3828e-12	-0.00695762	0.745	0.76	2.23433e-08	SAM domain and HD domain, 1 [Source:MGI Symbol;Acc:MGI:1927468]
CD4+ memory T	Fam78a	1.43552e-12	-0.0882091	0.216	0.268	2.31951e-08	family with sequence similarity 78, member A [Source:MGI Symbol;Acc:MGI:2443569]
CD4+ memory T	B4galnt1	1.55909e-12	-0.0202228	0.589	0.6	2.51918e-08	beta-1,4-N-acetyl-galactosaminyl transferase 1 [Source:MGI Symbol;Acc:MGI:1342057]
CD4+ memory T	Sumo2	1.5763e-12	0.397116	0.675	0.557	2.54698e-08	small ubiquitin-like modifier 2 [Source:MGI Symbol;Acc:MGI:2158813]
CD4+ memory T	Capn1	1.65236e-12	-0.0659358	0.263	0.309	2.66989e-08	calpain 1 [Source:MGI Symbol;Acc:MGI:88263]
CD4+ memory T	Tia1	1.65527e-12	-0.0432366	0.407	0.433	2.67458e-08	cytotoxic granule-associated RNA binding protein 1 [Source:MGI Symbol;Acc:MGI:107914]
CD4+ memory T	Brd2	1.70911e-12	-0.0200537	0.556	0.561	2.76159e-08	bromodomain containing 2 [Source:MGI Symbol;Acc:MGI:99495]
CD4+ memory T	Ubqln1	1.822e-12	-0.0950781	0.187	0.242	2.94399e-08	ubiquilin 1 [Source:MGI Symbol;Acc:MGI:1860276]
CD4+ memory T	Uqcrb	1.97943e-12	0.329354	0.518	0.351	3.19837e-08	ubiquinol-cytochrome c reductase binding protein [Source:MGI Symbol;Acc:MGI:1914780]
CD4+ memory T	Aebp2	1.99997e-12	-0.0385923	0.522	0.537	3.23154e-08	AE binding protein 2 [Source:MGI Symbol;Acc:MGI:1338038]
CD4+ memory T	Tmpo	2.03717e-12	-0.0454454	0.378	0.403	3.29165e-08	thymopoietin [Source:MGI Symbol;Acc:MGI:106920]
CD4+ memory T	Fcho2	2.05389e-12	-0.0489747	0.345	0.366	3.31868e-08	FCH domain only 2 [Source:MGI Symbol;Acc:MGI:3505790]
CD4+ memory T	Tgoln1	2.12035e-12	-0.0335328	0.416	0.429	3.42607e-08	trans-golgi network protein [Source:MGI Symbol;Acc:MGI:105080]
CD4+ memory T	Etv3	2.14361e-12	-0.0913854	0.207	0.25	3.46365e-08	ets variant 3 [Source:MGI Symbol;Acc:MGI:1350926]
CD4+ memory T	Creb1	2.15221e-12	-0.0590685	0.426	0.462	3.47754e-08	cAMP responsive element binding protein 1 [Source:MGI Symbol;Acc:MGI:88494]
CD4+ memory T	Pptc7	2.33301e-12	-0.0465701	0.343	0.361	3.76967e-08	PTC7 protein phosphatase homolog [Source:MGI Symbol;Acc:MGI:2444593]
CD4+ memory T	Apobec3	2.41683e-12	0.00368314	0.794	0.762	3.90511e-08	apolipoprotein B mRNA editing enzyme, catalytic polypeptide 3 [Source:MGI Symbol;Acc:MGI:1933111]
CD4+ memory T	Rpl26	2.42908e-12	0.535252	0.944	0.939	3.9249e-08	ribosomal protein L26 [Source:MGI Symbol;Acc:MGI:106022]
CD4+ memory T	Rab10	2.43686e-12	-0.0238172	0.466	0.48	3.93747e-08	RAB10, member RAS oncogene family [Source:MGI Symbol;Acc:MGI:105066]
CD4+ memory T	Rbm4	2.6068e-12	-0.0549063	0.269	0.301	4.21206e-08	RNA binding motif protein 4 [Source:MGI Symbol;Acc:MGI:1100865]
CD4+ memory T	Nsmaf	2.68257e-12	-0.0516835	0.331	0.365	4.33449e-08	neutral sphingomyelinase (N-SMase) activation associated factor [Source:MGI Symbol;Acc:MGI:1341864]
CD4+ memory T	Fam193b	2.68495e-12	-0.0633757	0.238	0.284	4.33834e-08	family with sequence similarity 193, member B [Source:MGI Symbol;Acc:MGI:2385851]
CD4+ memory T	Lbr	2.69047e-12	-0.0398907	0.455	0.47	4.34727e-08	lamin B receptor [Source:MGI Symbol;Acc:MGI:2138281]
CD4+ memory T	Ctbp1	2.73171e-12	-0.0469247	0.335	0.361	4.41391e-08	C-terminal binding protein 1 [Source:MGI Symbol;Acc:MGI:1201685]
CD4+ memory T	Rpl37a	2.75092e-12	0.0836671	0.979	0.987	4.44493e-08	ribosomal protein L37a [Source:MGI Symbol;Acc:MGI:98068]
CD4+ memory T	Mtf2	2.99807e-12	-0.0563815	0.289	0.319	4.84428e-08	metal response element binding transcription factor 2 [Source:MGI Symbol;Acc:MGI:105050]
CD4+ memory T	Fgfr1op2	3.04162e-12	-0.0267146	0.521	0.537	4.91465e-08	FGFR1 oncogene partner 2 [Source:MGI Symbol;Acc:MGI:1914779]
CD4+ memory T	Tug1	3.0645e-12	-0.0487482	0.325	0.336	4.95163e-08	taurine upregulated gene 1 [Source:MGI Symbol;Acc:MGI:2144114]
CD4+ memory T	Park7	3.29514e-12	0.329738	0.561	0.41	5.32429e-08	Parkinson disease (autosomal recessive, early onset) 7 [Source:MGI Symbol;Acc:MGI:2135637]
CD4+ memory T	Sun2	3.43186e-12	-0.0415939	0.39	0.415	5.5452e-08	Sad1 and UNC84 domain containing 2 [Source:MGI Symbol;Acc:MGI:2443011]
CD4+ memory T	Aff4	3.58134e-12	-0.0639905	0.253	0.294	5.78673e-08	AF4/FMR2 family, member 4 [Source:MGI Symbol;Acc:MGI:2136171]
CD4+ memory T	Gpbp1	3.60378e-12	-0.0391371	0.391	0.402	5.82298e-08	GC-rich promoter binding protein 1 [Source:MGI Symbol;Acc:MGI:1920524]
CD4+ memory T	Ythdf3	3.62401e-12	-0.0644609	0.247	0.286	5.85568e-08	YTH N6-methyladenosine RNA binding protein 3 [Source:MGI Symbol;Acc:MGI:1918850]
CD4+ memory T	D16Ertd472e	3.62921e-12	-0.0662986	0.28	0.318	5.86408e-08	DNA segment, Chr 16, ERATO Doi 472, expressed [Source:MGI Symbol;Acc:MGI:1196400]
CD4+ memory T	Xpo6	3.6345e-12	-0.0579682	0.294	0.327	5.87263e-08	exportin 6 [Source:MGI Symbol;Acc:MGI:2429950]
CD4+ memory T	Rangap1	3.65133e-12	-0.0783739	0.232	0.268	5.89982e-08	RAN GTPase activating protein 1 [Source:MGI Symbol;Acc:MGI:103071]
CD4+ memory T	Ptp4a3	3.94338e-12	-0.11058	0.192	0.241	6.37172e-08	protein tyrosine phosphatase 4a3 [Source:MGI Symbol;Acc:MGI:1277098]
CD4+ memory T	Actr2	4.03421e-12	-0.00910479	0.731	0.707	6.51848e-08	ARP2 actin-related protein 2 [Source:MGI Symbol;Acc:MGI:1913963]
CD4+ memory T	Hmg20a	4.16714e-12	-0.102172	0.18	0.239	6.73326e-08	high mobility group 20A [Source:MGI Symbol;Acc:MGI:1914117]
CD4+ memory T	Ggnbp2	4.18014e-12	-0.0318539	0.484	0.485	6.75427e-08	gametogenetin binding protein 2 [Source:MGI Symbol;Acc:MGI:2387356]
CD4+ memory T	Zswim6	4.24335e-12	-0.101918	0.189	0.239	6.8564e-08	zinc finger SWIM-type containing 6 [Source:MGI Symbol;Acc:MGI:1914513]
CD4+ memory T	Zfp217	4.2981e-12	-0.0767725	0.211	0.257	6.94487e-08	zinc finger protein 217 [Source:MGI Symbol;Acc:MGI:2685408]
CD4+ memory T	Tsc22d2	4.32113e-12	-0.075221	0.228	0.272	6.98208e-08	TSC22 domain family, member 2 [Source:MGI Symbol;Acc:MGI:1919283]
CD4+ memory T	Taok1	4.33387e-12	-0.0474474	0.385	0.401	7.00267e-08	TAO kinase 1 [Source:MGI Symbol;Acc:MGI:1914490]
CD4+ memory T	Fam169b	4.50226e-12	-0.0453416	0.415	0.437	7.27475e-08	family with sequence similarity 169, member B [Source:MGI Symbol;Acc:MGI:3644026]
CD4+ memory T	Kmt2d	4.70562e-12	-0.037563	0.364	0.379	7.60335e-08	lysine (K)-specific methyltransferase 2D [Source:MGI Symbol;Acc:MGI:2682319]
CD4+ memory T	Pcna	4.87406e-12	-0.0816232	0.319	0.366	7.87551e-08	proliferating cell nuclear antigen [Source:MGI Symbol;Acc:MGI:97503]
CD4+ memory T	Banp	4.88654e-12	-0.118603	0.148	0.221	7.89567e-08	BTG3 associated nuclear protein [Source:MGI Symbol;Acc:MGI:1889023]
CD4+ memory T	Smchd1	5.02646e-12	-0.0319792	0.507	0.506	8.12175e-08	SMC hinge domain containing 1 [Source:MGI Symbol;Acc:MGI:1921605]
CD4+ memory T	Rps5	5.04504e-12	0.532043	0.941	0.935	8.15178e-08	ribosomal protein S5 [Source:MGI Symbol;Acc:MGI:1097682]
CD4+ memory T	Nek7	5.08497e-12	-0.0207311	0.502	0.505	8.21629e-08	NIMA (never in mitosis gene a)-related expressed kinase 7 [Source:MGI Symbol;Acc:MGI:1890645]
CD4+ memory T	Tbl1xr1	5.08602e-12	-0.0560546	0.348	0.369	8.21799e-08	transducin (beta)-like 1X-linked receptor 1 [Source:MGI Symbol;Acc:MGI:2441730]
CD4+ memory T	Abi1	5.12036e-12	-0.0423405	0.377	0.393	8.27348e-08	abl interactor 1 [Source:MGI Symbol;Acc:MGI:104913]
CD4+ memory T	Nxpe3	5.14349e-12	-0.043347	0.332	0.362	8.31085e-08	neurexophilin and PC-esterase domain family, member 3 [Source:MGI Symbol;Acc:MGI:2686598]
CD4+ memory T	Golph3	5.17905e-12	-0.0673361	0.24	0.283	8.36831e-08	golgi phosphoprotein 3 [Source:MGI Symbol;Acc:MGI:1913879]
CD4+ memory T	Mapk1	5.23826e-12	-0.0400054	0.389	0.417	8.46398e-08	mitogen-activated protein kinase 1 [Source:MGI Symbol;Acc:MGI:1346858]
CD4+ memory T	Twf2	5.27259e-12	-0.0587153	0.301	0.338	8.51946e-08	twinfilin actin binding protein 2 [Source:MGI Symbol;Acc:MGI:1346078]
CD4+ memory T	Mycbp2	5.31818e-12	0.045714	0.806	0.787	8.59311e-08	MYC binding protein 2, E3 ubiquitin protein ligase [Source:MGI Symbol;Acc:MGI:2179432]
CD4+ memory T	Dnmt3a	5.48268e-12	-0.0660459	0.284	0.314	8.85892e-08	DNA methyltransferase 3A [Source:MGI Symbol;Acc:MGI:1261827]
CD4+ memory T	Prrc2b	5.56285e-12	-0.0195264	0.522	0.519	8.98846e-08	proline-rich coiled-coil 2B [Source:MGI Symbol;Acc:MGI:1923304]
CD4+ memory T	Ranbp2	5.652e-12	-0.0280827	0.445	0.471	9.13249e-08	RAN binding protein 2 [Source:MGI Symbol;Acc:MGI:894323]
CD4+ memory T	Zmynd11	5.89559e-12	-0.0592954	0.285	0.321	9.52609e-08	zinc finger, MYND domain containing 11 [Source:MGI Symbol;Acc:MGI:1913755]
CD4+ memory T	Hnrnpf	5.96485e-12	0.0390269	0.77	0.785	9.638e-08	heterogeneous nuclear ribonucleoprotein F [Source:MGI Symbol;Acc:MGI:2138741]
CD4+ memory T	Agfg1	5.9816e-12	-0.0361033	0.44	0.471	9.66506e-08	ArfGAP with FG repeats 1 [Source:MGI Symbol;Acc:MGI:1333754]
CD4+ memory T	Sbno1	6.20623e-12	-0.0222791	0.508	0.511	1.0028e-07	strawberry notch 1 [Source:MGI Symbol;Acc:MGI:2384298]
CD4+ memory T	Larp1	6.27803e-12	-0.0638774	0.326	0.364	1.0144e-07	La ribonucleoprotein domain family, member 1 [Source:MGI Symbol;Acc:MGI:1890165]
CD4+ memory T	Gmfb	6.31523e-12	-0.0601303	0.279	0.328	1.02042e-07	glia maturation factor, beta [Source:MGI Symbol;Acc:MGI:1927133]
CD4+ memory T	Trps1	6.34607e-12	-0.0722122	0.278	0.303	1.0254e-07	transcriptional repressor GATA binding 1 [Source:MGI Symbol;Acc:MGI:1927616]
CD4+ memory T	Mef2a	6.45985e-12	-0.083731	0.216	0.256	1.04378e-07	myocyte enhancer factor 2A [Source:MGI Symbol;Acc:MGI:99532]
CD4+ memory T	Tcp1	6.49305e-12	-0.0454217	0.407	0.431	1.04915e-07	t-complex protein 1 [Source:MGI Symbol;Acc:MGI:98535]
CD4+ memory T	Hltf	6.58695e-12	-0.0597359	0.266	0.3	1.06432e-07	helicase-like transcription factor [Source:MGI Symbol;Acc:MGI:1196437]
CD4+ memory T	Mllt10	6.82237e-12	-0.0584605	0.279	0.316	1.10236e-07	myeloid/lymphoid or mixed-lineage leukemia; translocated to, 10 [Source:MGI Symbol;Acc:MGI:1329038]
CD4+ memory T	Jade2	6.93121e-12	-0.060616	0.269	0.314	1.11994e-07	jade family PHD finger 2 [Source:MGI Symbol;Acc:MGI:1924151]
CD4+ memory T	Rnf4	7.70881e-12	-0.0560416	0.257	0.289	1.24559e-07	ring finger protein 4 [Source:MGI Symbol;Acc:MGI:1201691]
CD4+ memory T	Mon2	7.95006e-12	-0.0873168	0.195	0.25	1.28457e-07	MON2 homolog, regulator of endosome to Golgi trafficking [Source:MGI Symbol;Acc:MGI:1914324]
CD4+ memory T	Mknk2	8.01515e-12	-0.049548	0.377	0.407	1.29509e-07	MAP kinase-interacting serine/threonine kinase 2 [Source:MGI Symbol;Acc:MGI:894279]
CD4+ memory T	Tra2b	8.29521e-12	0.0148099	0.706	0.69	1.34034e-07	transformer 2 beta [Source:MGI Symbol;Acc:MGI:106016]
CD4+ memory T	Helz2	9.16561e-12	-0.0750263	0.22	0.263	1.48098e-07	helicase with zinc finger 2, transcriptional coactivator [Source:MGI Symbol;Acc:MGI:2385169]
CD4+ memory T	Soat1	9.34355e-12	-0.072637	0.224	0.265	1.50973e-07	sterol O-acyltransferase 1 [Source:MGI Symbol;Acc:MGI:104665]
CD4+ memory T	Trim12a	9.61831e-12	-0.0262284	0.478	0.486	1.55413e-07	tripartite motif-containing 12A [Source:MGI Symbol;Acc:MGI:1923931]
CD4+ memory T	Mta2	9.77098e-12	-0.0487692	0.326	0.35	1.57879e-07	metastasis-associated gene family, member 2 [Source:MGI Symbol;Acc:MGI:1346340]
CD4+ memory T	Mir142hg	9.77377e-12	-0.0307744	0.421	0.435	1.57925e-07	Mir142 host gene (non-protein coding) [Source:MGI Symbol;Acc:MGI:1925841]
CD4+ memory T	Asxl2	9.99755e-12	-0.0271268	0.52	0.519	1.6154e-07	ASXL transcriptional regulator 2 [Source:MGI Symbol;Acc:MGI:1922552]
CD4+ memory T	Smc6	1.03532e-11	-0.0432959	0.446	0.449	1.67286e-07	structural maintenance of chromosomes 6 [Source:MGI Symbol;Acc:MGI:1914491]
CD4+ memory T	Eif2s3x	1.12969e-11	-0.076877	0.213	0.263	1.82536e-07	eukaryotic translation initiation factor 2, subunit 3, structural gene X-linked [Source:MGI Symbol;Acc:MGI:1349431]
CD4+ memory T	Gigyf2	1.14769e-11	-0.047429	0.309	0.327	1.85444e-07	GRB10 interacting GYF protein 2 [Source:MGI Symbol;Acc:MGI:2138584]
CD4+ memory T	Znrf2	1.17131e-11	-0.0368768	0.431	0.451	1.8926e-07	zinc and ring finger 2 [Source:MGI Symbol;Acc:MGI:1196246]
CD4+ memory T	Tacc1	1.20276e-11	-0.0336909	0.456	0.47	1.94343e-07	transforming, acidic coiled-coil containing protein 1 [Source:MGI Symbol;Acc:MGI:2443510]
CD4+ memory T	Arid1b	1.22365e-11	-0.0742829	0.215	0.26	1.97718e-07	AT rich interactive domain 1B (SWI-like) [Source:MGI Symbol;Acc:MGI:1926129]
CD4+ memory T	Cyfip2	1.23567e-11	-0.0364852	0.434	0.467	1.99659e-07	cytoplasmic FMR1 interacting protein 2 [Source:MGI Symbol;Acc:MGI:1924134]
CD4+ memory T	Ppp1r16b	1.28019e-11	-0.0484703	0.378	0.394	2.06853e-07	protein phosphatase 1, regulatory subunit 16B [Source:MGI Symbol;Acc:MGI:2151841]
CD4+ memory T	Atp6v0b	1.3092e-11	-0.042503	0.38	0.38	2.1154e-07	ATPase, H+ transporting, lysosomal V0 subunit B [Source:MGI Symbol;Acc:MGI:1890510]
CD4+ memory T	Kpna4	1.32315e-11	-0.0328885	0.399	0.409	2.13795e-07	karyopherin (importin) alpha 4 [Source:MGI Symbol;Acc:MGI:1100848]
CD4+ memory T	Mbtd1	1.32353e-11	-0.073945	0.239	0.278	2.13856e-07	mbt domain containing 1 [Source:MGI Symbol;Acc:MGI:2143977]
CD4+ memory T	Stx4a	1.33141e-11	-0.0490185	0.297	0.333	2.1513e-07	syntaxin 4A (placental) [Source:MGI Symbol;Acc:MGI:893577]
CD4+ memory T	Csnk1d	1.33827e-11	-0.066852	0.227	0.271	2.16238e-07	casein kinase 1, delta [Source:MGI Symbol;Acc:MGI:1355272]
CD4+ memory T	Dmxl1	1.35361e-11	-0.0738157	0.251	0.289	2.18717e-07	Dmx-like 1 [Source:MGI Symbol;Acc:MGI:2443926]
CD4+ memory T	Emsy	1.38648e-11	-0.0396811	0.391	0.396	2.24028e-07	EMSY, BRCA2-interacting transcriptional repressor [Source:MGI Symbol;Acc:MGI:1924203]
CD4+ memory T	Cdk9	1.39128e-11	-0.0467915	0.292	0.322	2.24803e-07	cyclin-dependent kinase 9 (CDC2-related kinase) [Source:MGI Symbol;Acc:MGI:1328368]
CD4+ memory T	Huwe1	1.42156e-11	-0.0172292	0.531	0.544	2.29696e-07	HECT, UBA and WWE domain containing 1 [Source:MGI Symbol;Acc:MGI:1926884]
CD4+ memory T	Wac	1.42173e-11	-0.0200418	0.459	0.472	2.29724e-07	WW domain containing adaptor with coiled-coil [Source:MGI Symbol;Acc:MGI:2387357]
CD4+ memory T	Siglecg	1.42794e-11	-0.229872	0.093	0.19	2.30727e-07	sialic acid binding Ig-like lectin G [Source:MGI Symbol;Acc:MGI:2443630]
CD4+ memory T	Otud4	1.44031e-11	-0.0606314	0.264	0.303	2.32725e-07	OTU domain containing 4 [Source:MGI Symbol;Acc:MGI:1098801]
CD4+ memory T	Atp6ap1	1.46809e-11	-0.0655467	0.219	0.257	2.37215e-07	ATPase, H+ transporting, lysosomal accessory protein 1 [Source:MGI Symbol;Acc:MGI:109629]
CD4+ memory T	Aftph	1.48977e-11	-0.0461085	0.323	0.343	2.40717e-07	aftiphilin [Source:MGI Symbol;Acc:MGI:1923012]
CD4+ memory T	Nckap1l	1.52373e-11	-0.0552025	0.27	0.31	2.46204e-07	NCK associated protein 1 like [Source:MGI Symbol;Acc:MGI:1926063]
CD4+ memory T	Il16	1.56294e-11	-0.0106437	0.532	0.537	2.5254e-07	interleukin 16 [Source:MGI Symbol;Acc:MGI:1270855]
CD4+ memory T	Psma2	1.70927e-11	0.32465	0.546	0.41	2.76185e-07	proteasome subunit alpha 2 [Source:MGI Symbol;Acc:MGI:104885]
CD4+ memory T	Leng8	1.76499e-11	-0.0309302	0.373	0.391	2.85187e-07	leukocyte receptor cluster (LRC) member 8 [Source:MGI Symbol;Acc:MGI:2142195]
CD4+ memory T	Kmt5b	1.86134e-11	-0.0360591	0.348	0.379	3.00756e-07	lysine methyltransferase 5B [Source:MGI Symbol;Acc:MGI:2444557]
CD4+ memory T	Rps4x	1.8753e-11	0.530902	0.952	0.944	3.03011e-07	ribosomal protein S4, X-linked [Source:MGI Symbol;Acc:MGI:98158]
CD4+ memory T	Khdrbs1	1.88846e-11	-0.00509021	0.562	0.575	3.05137e-07	KH domain containing, RNA binding, signal transduction associated 1 [Source:MGI Symbol;Acc:MGI:893579]
CD4+ memory T	Exoc5	1.90125e-11	-0.0615996	0.231	0.274	3.07205e-07	exocyst complex component 5 [Source:MGI Symbol;Acc:MGI:2145645]
CD4+ memory T	Hcls1	1.92548e-11	-0.0360014	0.45	0.48	3.11119e-07	hematopoietic cell specific Lyn substrate 1 [Source:MGI Symbol;Acc:MGI:104568]
CD4+ memory T	Elmo1	1.97418e-11	-0.0183095	0.469	0.477	3.18988e-07	engulfment and cell motility 1 [Source:MGI Symbol;Acc:MGI:2153044]
CD4+ memory T	Ythdc1	1.99522e-11	0.0200929	0.679	0.678	3.22388e-07	YTH domain containing 1 [Source:MGI Symbol;Acc:MGI:2443713]
CD4+ memory T	Ankib1	2.04565e-11	-0.0688198	0.238	0.276	3.30537e-07	ankyrin repeat and IBR domain containing 1 [Source:MGI Symbol;Acc:MGI:1918047]
CD4+ memory T	Supt4a	2.06961e-11	0.336189	0.549	0.421	3.34407e-07	SPT4A, DSIF elongation factor subunit [Source:MGI Symbol;Acc:MGI:107416]
CD4+ memory T	Ugcg	2.25269e-11	-0.121672	0.162	0.222	3.6399e-07	UDP-glucose ceramide glucosyltransferase [Source:MGI Symbol;Acc:MGI:1332243]
CD4+ memory T	Ubr4	2.26082e-11	-0.0423083	0.294	0.311	3.65303e-07	ubiquitin protein ligase E3 component n-recognin 4 [Source:MGI Symbol;Acc:MGI:1916366]
CD4+ memory T	Tecpr1	2.29335e-11	-0.0338237	0.492	0.519	3.70559e-07	tectonin beta-propeller repeat containing 1 [Source:MGI Symbol;Acc:MGI:1917631]
CD4+ memory T	Azi2	2.33941e-11	-0.0530307	0.273	0.302	3.78002e-07	5-azacytidine induced gene 2 [Source:MGI Symbol;Acc:MGI:1351332]
CD4+ memory T	Lypla2	2.34266e-11	-0.0425291	0.316	0.353	3.78527e-07	lysophospholipase 2 [Source:MGI Symbol;Acc:MGI:1347000]
CD4+ memory T	St6gal1	2.51102e-11	-0.0571205	0.27	0.303	4.0573e-07	beta galactoside alpha 2,6 sialyltransferase 1 [Source:MGI Symbol;Acc:MGI:108470]
CD4+ memory T	Pcnp	2.52142e-11	-0.0384814	0.358	0.388	4.07412e-07	PEST proteolytic signal containing nuclear protein [Source:MGI Symbol;Acc:MGI:1923552]
CD4+ memory T	Btla	2.5651e-11	-0.0899114	0.253	0.293	4.14469e-07	B and T lymphocyte associated [Source:MGI Symbol;Acc:MGI:2658978]
CD4+ memory T	Rbm25	2.62055e-11	0.0498976	0.784	0.793	4.23428e-07	RNA binding motif protein 25 [Source:MGI Symbol;Acc:MGI:1914289]
CD4+ memory T	Ccnt1	2.75118e-11	-0.0411016	0.354	0.372	4.44536e-07	cyclin T1 [Source:MGI Symbol;Acc:MGI:1328363]
CD4+ memory T	Rcc2	2.85212e-11	-0.0513975	0.276	0.302	4.60845e-07	regulator of chromosome condensation 2 [Source:MGI Symbol;Acc:MGI:1919784]
CD4+ memory T	Slbp	3.02548e-11	-0.0639632	0.253	0.29	4.88856e-07	stem-loop binding protein [Source:MGI Symbol;Acc:MGI:108402]
CD4+ memory T	Dido1	3.0313e-11	-0.038269	0.31	0.343	4.89797e-07	death inducer-obliterator 1 [Source:MGI Symbol;Acc:MGI:1344352]
CD4+ memory T	Actr3	3.05581e-11	0.00748636	0.828	0.801	4.93757e-07	ARP3 actin-related protein 3 [Source:MGI Symbol;Acc:MGI:1921367]
CD4+ memory T	Mecp2	3.10121e-11	-0.0429655	0.297	0.322	5.01093e-07	methyl CpG binding protein 2 [Source:MGI Symbol;Acc:MGI:99918]
CD4+ memory T	Cspp1	3.13258e-11	-0.0799965	0.225	0.268	5.06162e-07	centrosome and spindle pole associated protein 1 [Source:MGI Symbol;Acc:MGI:2681832]
CD4+ memory T	Slc38a2	3.15299e-11	-0.0313171	0.425	0.441	5.09461e-07	solute carrier family 38, member 2 [Source:MGI Symbol;Acc:MGI:1915010]
CD4+ memory T	Snrpd2	3.22385e-11	0.33556	0.552	0.421	5.2091e-07	small nuclear ribonucleoprotein D2 [Source:MGI Symbol;Acc:MGI:98345]
CD4+ memory T	Fau	3.23169e-11	0.53494	0.979	0.976	5.22176e-07	Finkel-Biskis-Reilly murine sarcoma virus (FBR-MuSV) ubiquitously expressed (fox derived) [Source:MGI Symbol;Acc:MGI:102547]
CD4+ memory T	Ogdh	3.30742e-11	-0.0477701	0.293	0.325	5.34413e-07	oxoglutarate (alpha-ketoglutarate) dehydrogenase (lipoamide) [Source:MGI Symbol;Acc:MGI:1098267]
CD4+ memory T	Cd2	3.47993e-11	0.407475	0.778	0.665	5.62288e-07	CD2 antigen [Source:MGI Symbol;Acc:MGI:88320]
CD4+ memory T	Dyrk2	3.50015e-11	-0.0515869	0.277	0.298	5.65554e-07	dual-specificity tyrosine-(Y)-phosphorylation regulated kinase 2 [Source:MGI Symbol;Acc:MGI:1330301]
CD4+ memory T	Rgs14	3.8035e-11	-0.0671898	0.211	0.257	6.14569e-07	regulator of G-protein signaling 14 [Source:MGI Symbol;Acc:MGI:1859709]
CD4+ memory T	Atic	3.82286e-11	-0.0684024	0.235	0.269	6.17698e-07	5-aminoimidazole-4-carboxamide ribonucleotide formyltransferase/IMP cyclohydrolase [Source:MGI Symbol;Acc:MGI:1351352]
CD4+ memory T	Glyr1	3.91199e-11	-0.0448218	0.295	0.318	6.32099e-07	glyoxylate reductase 1 homolog (Arabidopsis) [Source:MGI Symbol;Acc:MGI:1921272]
CD4+ memory T	Filip1l	4.04033e-11	-0.143972	0.169	0.229	6.52836e-07	filamin A interacting protein 1-like [Source:MGI Symbol;Acc:MGI:1925999]
CD4+ memory T	Tpm4	4.33058e-11	-0.0541692	0.424	0.45	6.99735e-07	tropomyosin 4 [Source:MGI Symbol;Acc:MGI:2449202]
CD4+ memory T	Uhmk1	4.36422e-11	-0.0674476	0.216	0.26	7.05171e-07	U2AF homology motif (UHM) kinase 1 [Source:MGI Symbol;Acc:MGI:1341908]
CD4+ memory T	Krtcap2	4.63794e-11	0.315754	0.497	0.345	7.49399e-07	keratinocyte associated protein 2 [Source:MGI Symbol;Acc:MGI:1913309]
CD4+ memory T	Abcg1	4.68802e-11	-0.071524	0.215	0.26	7.57491e-07	ATP binding cassette subfamily G member 1 [Source:MGI Symbol;Acc:MGI:107704]
CD4+ memory T	Zfp638	4.7081e-11	-0.0142331	0.485	0.484	7.60734e-07	zinc finger protein 638 [Source:MGI Symbol;Acc:MGI:1203484]
CD4+ memory T	Hspa4l	4.74935e-11	-0.11146	0.163	0.227	7.674e-07	heat shock protein 4 like [Source:MGI Symbol;Acc:MGI:107422]
CD4+ memory T	Wapl	4.84437e-11	-0.012158	0.487	0.499	7.82753e-07	WAPL cohesin release factor [Source:MGI Symbol;Acc:MGI:2675859]
CD4+ memory T	Atp5j2	4.94767e-11	0.376814	0.692	0.579	7.99444e-07	ATP synthase, H+ transporting, mitochondrial F0 complex, subunit F2 [Source:MGI Symbol;Acc:MGI:1927558]
CD4+ memory T	Rbck1	5.14285e-11	-0.0368888	0.321	0.351	8.30982e-07	RanBP-type and C3HC4-type zinc finger containing 1 [Source:MGI Symbol;Acc:MGI:1344372]
CD4+ memory T	Usp19	5.33687e-11	-0.059609	0.227	0.264	8.62331e-07	ubiquitin specific peptidase 19 [Source:MGI Symbol;Acc:MGI:1918722]
CD4+ memory T	Ncor1	5.64513e-11	0.0283566	0.737	0.731	9.12141e-07	nuclear receptor co-repressor 1 [Source:MGI Symbol;Acc:MGI:1349717]
CD4+ memory T	Nup98	5.64833e-11	-0.0565129	0.236	0.27	9.12656e-07	nucleoporin 98 [Source:MGI Symbol;Acc:MGI:109404]
CD4+ memory T	Tmod3	5.82079e-11	-0.054892	0.354	0.372	9.40523e-07	tropomodulin 3 [Source:MGI Symbol;Acc:MGI:1355315]
CD4+ memory T	Sec61a1	5.96643e-11	-0.0441925	0.318	0.345	9.64056e-07	Sec61 alpha 1 subunit (S. cerevisiae) [Source:MGI Symbol;Acc:MGI:1858417]
CD4+ memory T	Rap1gds1	5.96873e-11	-0.0390651	0.318	0.341	9.64428e-07	RAP1, GTP-GDP dissociation stimulator 1 [Source:MGI Symbol;Acc:MGI:2385189]
CD4+ memory T	Usp47	5.97112e-11	-0.0629957	0.218	0.264	9.64814e-07	ubiquitin specific peptidase 47 [Source:MGI Symbol;Acc:MGI:1922246]
CD4+ memory T	Rpn1	6.25499e-11	-0.0483853	0.312	0.342	1.01068e-06	ribophorin I [Source:MGI Symbol;Acc:MGI:98084]
CD4+ memory T	Kmt2e	6.40379e-11	0.0279515	0.742	0.713	1.03472e-06	lysine (K)-specific methyltransferase 2E [Source:MGI Symbol;Acc:MGI:1924825]
CD4+ memory T	Ccdc88c	6.42832e-11	-0.00996042	0.567	0.575	1.03869e-06	coiled-coil domain containing 88C [Source:MGI Symbol;Acc:MGI:1915589]
CD4+ memory T	Zap70	6.49946e-11	-0.0155156	0.497	0.529	1.05018e-06	zeta-chain (TCR) associated protein kinase [Source:MGI Symbol;Acc:MGI:99613]
CD4+ memory T	Cop1	6.5e-11	-0.0521617	0.249	0.279	1.05027e-06	COP1, E3 ubiquitin ligase [Source:MGI Symbol;Acc:MGI:1347046]
CD4+ memory T	Glcci1	6.53811e-11	-0.0593284	0.296	0.313	1.05643e-06	glucocorticoid induced transcript 1 [Source:MGI Symbol;Acc:MGI:2179717]
CD4+ memory T	Tmem131l	6.71343e-11	-0.0694756	0.249	0.275	1.08476e-06	transmembrane 131 like [Source:MGI Symbol;Acc:MGI:2443399]
CD4+ memory T	Kpnb1	6.79651e-11	-0.0492729	0.298	0.329	1.09818e-06	karyopherin (importin) beta 1 [Source:MGI Symbol;Acc:MGI:107532]
CD4+ memory T	Syt11	6.8521e-11	-0.0214675	0.506	0.514	1.10716e-06	synaptotagmin XI [Source:MGI Symbol;Acc:MGI:1859547]
CD4+ memory T	Lsm14a	6.89458e-11	-0.0330246	0.348	0.377	1.11403e-06	LSM14A mRNA processing body assembly factor [Source:MGI Symbol;Acc:MGI:1914320]
CD4+ memory T	Trim12c	6.94846e-11	-0.0421476	0.336	0.365	1.12273e-06	tripartite motif-containing 12C [Source:MGI Symbol;Acc:MGI:4821183]
CD4+ memory T	S100a6	7.15571e-11	0.644394	0.615	0.517	1.15622e-06	S100 calcium binding protein A6 (calcyclin) [Source:MGI Symbol;Acc:MGI:1339467]
CD4+ memory T	Ywhag	7.28421e-11	-0.0765044	0.197	0.247	1.17698e-06	tyrosine 3-monooxygenase/tryptophan 5-monooxygenase activation protein, gamma polypeptide [Source:MGI Symbol;Acc:MGI:108109]
CD4+ memory T	Luc7l	7.31214e-11	-0.0602019	0.24	0.277	1.1815e-06	Luc7-like [Source:MGI Symbol;Acc:MGI:1914228]
CD4+ memory T	Mast3	7.44168e-11	-0.0922165	0.177	0.227	1.20243e-06	microtubule associated serine/threonine kinase 3 [Source:MGI Symbol;Acc:MGI:2683541]
CD4+ memory T	Copz1	7.48043e-11	-0.0821427	0.19	0.232	1.20869e-06	coatomer protein complex, subunit zeta 1 [Source:MGI Symbol;Acc:MGI:1929063]
CD4+ memory T	Cand1	7.58846e-11	-0.0750141	0.191	0.246	1.22614e-06	cullin associated and neddylation disassociated 1 [Source:MGI Symbol;Acc:MGI:1261820]
CD4+ memory T	Tgfb1	7.66713e-11	-0.0303939	0.454	0.474	1.23885e-06	transforming growth factor, beta 1 [Source:MGI Symbol;Acc:MGI:98725]
CD4+ memory T	Pbx2	7.79254e-11	-0.0915813	0.17	0.225	1.25912e-06	pre B cell leukemia homeobox 2 [Source:MGI Symbol;Acc:MGI:1341793]
CD4+ memory T	Fbxl3	8.03326e-11	-0.0594237	0.236	0.269	1.29801e-06	F-box and leucine-rich repeat protein 3 [Source:MGI Symbol;Acc:MGI:1354702]
CD4+ memory T	Man2a2	8.27033e-11	-0.0666967	0.231	0.261	1.33632e-06	mannosidase 2, alpha 2 [Source:MGI Symbol;Acc:MGI:2150656]
CD4+ memory T	Bach2	8.29281e-11	-0.178747	0.122	0.192	1.33995e-06	BTB and CNC homology, basic leucine zipper transcription factor 2 [Source:MGI Symbol;Acc:MGI:894679]
CD4+ memory T	Chd8	8.39392e-11	-0.0250677	0.438	0.435	1.35629e-06	chromodomain helicase DNA binding protein 8 [Source:MGI Symbol;Acc:MGI:1915022]
CD4+ memory T	Crebl2	9.22799e-11	-0.0777692	0.212	0.255	1.49106e-06	cAMP responsive element binding protein-like 2 [Source:MGI Symbol;Acc:MGI:1889385]
CD4+ memory T	Ptprcap	9.70204e-11	0.429015	0.88	0.8	1.56766e-06	protein tyrosine phosphatase, receptor type, C polypeptide-associated protein [Source:MGI Symbol;Acc:MGI:97811]
CD4+ memory T	Scd1	9.73077e-11	-0.282418	0.063	0.171	1.5723e-06	stearoyl-Coenzyme A desaturase 1 [Source:MGI Symbol;Acc:MGI:98239]
CD4+ memory T	Zfp950	1.04625e-10	-0.0493099	0.303	0.322	1.69053e-06	zinc finger protein 950 [Source:MGI Symbol;Acc:MGI:2652824]
CD4+ memory T	Taok3	1.07179e-10	-0.0319639	0.405	0.411	1.7318e-06	TAO kinase 3 [Source:MGI Symbol;Acc:MGI:3041177]
CD4+ memory T	Mbp	1.09839e-10	-0.0349239	0.373	0.386	1.77478e-06	myelin basic protein [Source:MGI Symbol;Acc:MGI:96925]
CD4+ memory T	Trim8	1.10524e-10	-0.0264174	0.409	0.412	1.78584e-06	tripartite motif-containing 8 [Source:MGI Symbol;Acc:MGI:1933302]
CD4+ memory T	Tmed7	1.11987e-10	-0.07496	0.197	0.244	1.80949e-06	transmembrane p24 trafficking protein 7 [Source:MGI Symbol;Acc:MGI:1913926]
CD4+ memory T	Ebf1	1.17992e-10	-0.317153	0.092	0.178	1.90651e-06	early B cell factor 1 [Source:MGI Symbol;Acc:MGI:95275]
CD4+ memory T	Abhd17b	1.23527e-10	-0.118688	0.158	0.214	1.99594e-06	abhydrolase domain containing 17B [Source:MGI Symbol;Acc:MGI:1917816]
CD4+ memory T	Ubash3a	1.24383e-10	-0.0224508	0.502	0.48	2.00978e-06	ubiquitin associated and SH3 domain containing, A [Source:MGI Symbol;Acc:MGI:1926074]
CD4+ memory T	Prelid1	1.32032e-10	0.320963	0.539	0.393	2.13337e-06	PRELI domain containing 1 [Source:MGI Symbol;Acc:MGI:1913744]
CD4+ memory T	H2-DMb2	1.32103e-10	-0.211633	0.098	0.187	2.13452e-06	histocompatibility 2, class II, locus Mb2 [Source:MGI Symbol;Acc:MGI:95923]
CD4+ memory T	Dnajc5	1.32515e-10	-0.0297694	0.388	0.398	2.14118e-06	DnaJ heat shock protein family (Hsp40) member C5 [Source:MGI Symbol;Acc:MGI:892995]
CD4+ memory T	Rasa2	1.32789e-10	-0.0407331	0.296	0.321	2.1456e-06	RAS p21 protein activator 2 [Source:MGI Symbol;Acc:MGI:2149960]
CD4+ memory T	Tet2	1.36271e-10	-0.0507136	0.265	0.285	2.20187e-06	tet methylcytosine dioxygenase 2 [Source:MGI Symbol;Acc:MGI:2443298]
CD4+ memory T	Grb2	1.36709e-10	-0.032689	0.491	0.487	2.20894e-06	growth factor receptor bound protein 2 [Source:MGI Symbol;Acc:MGI:95805]
CD4+ memory T	Hnrnpu	1.38191e-10	0.0552113	0.8	0.803	2.23289e-06	heterogeneous nuclear ribonucleoprotein U [Source:MGI Symbol;Acc:MGI:1858195]
CD4+ memory T	Prkcsh	1.39179e-10	-0.0437272	0.28	0.301	2.24885e-06	protein kinase C substrate 80K-H [Source:MGI Symbol;Acc:MGI:107877]
CD4+ memory T	Cers2	1.39996e-10	-0.0459524	0.271	0.302	2.26206e-06	ceramide synthase 2 [Source:MGI Symbol;Acc:MGI:1924143]
CD4+ memory T	Plcg1	1.42385e-10	-0.0302593	0.33	0.336	2.30065e-06	phospholipase C, gamma 1 [Source:MGI Symbol;Acc:MGI:97615]
CD4+ memory T	Sh3kbp1	1.44872e-10	-0.00713203	0.528	0.531	2.34085e-06	SH3-domain kinase binding protein 1 [Source:MGI Symbol;Acc:MGI:1889583]
CD4+ memory T	Tasor	1.49235e-10	-0.0190881	0.479	0.479	2.41134e-06	transcription activation suppressor [Source:MGI Symbol;Acc:MGI:1921694]
CD4+ memory T	Mob3a	1.5521e-10	-0.0473389	0.274	0.315	2.50789e-06	MOB kinase activator 3A [Source:MGI Symbol;Acc:MGI:3050117]
CD4+ memory T	Ythdf1	1.59056e-10	-0.097588	0.162	0.219	2.57003e-06	YTH N6-methyladenosine RNA binding protein 1 [Source:MGI Symbol;Acc:MGI:1917431]
CD4+ memory T	Adipor1	1.61556e-10	-0.0432576	0.266	0.29	2.61043e-06	adiponectin receptor 1 [Source:MGI Symbol;Acc:MGI:1919924]
CD4+ memory T	Ap2b1	1.6548e-10	-0.0429542	0.283	0.303	2.67383e-06	adaptor-related protein complex 2, beta 1 subunit [Source:MGI Symbol;Acc:MGI:1919020]
CD4+ memory T	Tbc1d4	1.66152e-10	0.0190529	0.632	0.62	2.68468e-06	TBC1 domain family, member 4 [Source:MGI Symbol;Acc:MGI:2429660]
CD4+ memory T	Dpp8	1.74878e-10	-0.0465863	0.267	0.293	2.82569e-06	dipeptidylpeptidase 8 [Source:MGI Symbol;Acc:MGI:1921638]
CD4+ memory T	Ctsd	1.80455e-10	-0.0370681	0.461	0.467	2.91578e-06	cathepsin D [Source:MGI Symbol;Acc:MGI:88562]
CD4+ memory T	Cdipt	1.83757e-10	-0.0383106	0.346	0.377	2.96914e-06	CDP-diacylglycerol--inositol 3-phosphatidyltransferase (phosphatidylinositol synthase) [Source:MGI Symbol;Acc:MGI:105491]
CD4+ memory T	Srsf2	1.90591e-10	-0.0152904	0.55	0.57	3.07958e-06	serine and arginine-rich splicing factor 2 [Source:MGI Symbol;Acc:MGI:98284]
CD4+ memory T	Kat2b	1.93679e-10	-0.0920781	0.167	0.22	3.12946e-06	K(lysine) acetyltransferase 2B [Source:MGI Symbol;Acc:MGI:1343094]
CD4+ memory T	Taz	1.93928e-10	-0.0545545	0.224	0.261	3.13349e-06	tafazzin [Source:MGI Symbol;Acc:MGI:109626]
CD4+ memory T	Hnrnpul1	1.96197e-10	-0.0153741	0.462	0.471	3.17015e-06	heterogeneous nuclear ribonucleoprotein U-like 1 [Source:MGI Symbol;Acc:MGI:2443517]
CD4+ memory T	Prpf39	2.06368e-10	-0.0276142	0.322	0.339	3.33449e-06	pre-mRNA processing factor 39 [Source:MGI Symbol;Acc:MGI:104602]
CD4+ memory T	Hnrnph3	2.07475e-10	-0.0430912	0.271	0.292	3.35238e-06	heterogeneous nuclear ribonucleoprotein H3 [Source:MGI Symbol;Acc:MGI:1926462]
CD4+ memory T	Alkbh5	2.19098e-10	-0.0351524	0.296	0.316	3.54019e-06	alkB homolog 5, RNA demethylase [Source:MGI Symbol;Acc:MGI:2144489]
CD4+ memory T	Ikzf3	2.22241e-10	-0.0728435	0.291	0.315	3.59098e-06	IKAROS family zinc finger 3 [Source:MGI Symbol;Acc:MGI:1342542]
CD4+ memory T	WPRE	2.34309e-10	-0.0739764	0.4	0.419	3.78597e-06	NA
CD4+ memory T	Pax5	2.34887e-10	-0.272479	0.078	0.167	3.79531e-06	paired box 5 [Source:MGI Symbol;Acc:MGI:97489]
CD4+ memory T	Mia3	2.40494e-10	-0.0284503	0.397	0.412	3.8859e-06	melanoma inhibitory activity 3 [Source:MGI Symbol;Acc:MGI:2443183]
CD4+ memory T	Prkd2	2.43185e-10	-0.031335	0.361	0.374	3.92938e-06	protein kinase D2 [Source:MGI Symbol;Acc:MGI:2141917]
CD4+ memory T	Ssh1	2.4589e-10	-0.0383753	0.27	0.297	3.97309e-06	slingshot protein phosphatase 1 [Source:MGI Symbol;Acc:MGI:2686240]
CD4+ memory T	Snrk	2.48478e-10	-0.058441	0.227	0.269	4.01491e-06	SNF related kinase [Source:MGI Symbol;Acc:MGI:108104]
CD4+ memory T	Il6ra	2.4969e-10	-0.0367	0.399	0.421	4.03449e-06	interleukin 6 receptor, alpha [Source:MGI Symbol;Acc:MGI:105304]
CD4+ memory T	Nono	2.54927e-10	-0.0128079	0.503	0.513	4.11912e-06	non-POU-domain-containing, octamer binding protein [Source:MGI Symbol;Acc:MGI:1855692]
CD4+ memory T	Tet3	2.61548e-10	-0.0301184	0.375	0.395	4.2261e-06	tet methylcytosine dioxygenase 3 [Source:MGI Symbol;Acc:MGI:2446229]
CD4+ memory T	Camk2d	2.66061e-10	0.00557644	0.537	0.537	4.29902e-06	calcium/calmodulin-dependent protein kinase II, delta [Source:MGI Symbol;Acc:MGI:1341265]
CD4+ memory T	Add3	2.71965e-10	-0.0545273	0.379	0.405	4.39441e-06	adducin 3 (gamma) [Source:MGI Symbol;Acc:MGI:1351615]
CD4+ memory T	Spen	2.7374e-10	-0.0288884	0.333	0.358	4.42309e-06	spen family transcription repressor [Source:MGI Symbol;Acc:MGI:1891706]
CD4+ memory T	Zbtb1	2.8387e-10	-0.0201481	0.426	0.431	4.58678e-06	zinc finger and BTB domain containing 1 [Source:MGI Symbol;Acc:MGI:2442326]
CD4+ memory T	Mat2b	2.9282e-10	-0.0150667	0.42	0.433	4.73139e-06	methionine adenosyltransferase II, beta [Source:MGI Symbol;Acc:MGI:1913667]
CD4+ memory T	Zfp831	2.96157e-10	-0.0372325	0.295	0.327	4.78531e-06	zinc finger protein 831 [Source:MGI Symbol;Acc:MGI:3641861]
CD4+ memory T	Rai1	3.02776e-10	-0.0816242	0.182	0.229	4.89226e-06	retinoic acid induced 1 [Source:MGI Symbol;Acc:MGI:103291]
CD4+ memory T	Pou2f1	3.02854e-10	-0.0681966	0.209	0.252	4.89352e-06	POU domain, class 2, transcription factor 1 [Source:MGI Symbol;Acc:MGI:101898]
CD4+ memory T	Myo9b	3.12658e-10	-0.0504292	0.24	0.269	5.05193e-06	myosin IXb [Source:MGI Symbol;Acc:MGI:106624]
CD4+ memory T	Mtss1	3.18822e-10	-0.134587	0.139	0.208	5.15152e-06	MTSS I-BAR domain containing 1 [Source:MGI Symbol;Acc:MGI:2384818]
CD4+ memory T	Smarca2	3.20142e-10	-0.0392059	0.298	0.327	5.17286e-06	SWI/SNF related, matrix associated, actin dependent regulator of chromatin, subfamily a, member 2 [Source:MGI Symbol;Acc:MGI:99603]
CD4+ memory T	Cd38	3.26751e-10	-0.150714	0.141	0.202	5.27964e-06	CD38 antigen [Source:MGI Symbol;Acc:MGI:107474]
CD4+ memory T	Zc3h4	3.37554e-10	-0.0625379	0.209	0.249	5.4542e-06	zinc finger CCCH-type containing 4 [Source:MGI Symbol;Acc:MGI:2682314]
CD4+ memory T	Supt5	3.44243e-10	-0.0259989	0.388	0.389	5.56228e-06	suppressor of Ty 5, DSIF elongation factor subunit [Source:MGI Symbol;Acc:MGI:1202400]
CD4+ memory T	Pcmtd1	3.57006e-10	-0.0352665	0.334	0.333	5.7685e-06	protein-L-isoaspartate (D-aspartate) O-methyltransferase domain containing 1 [Source:MGI Symbol;Acc:MGI:2441773]
CD4+ memory T	Fmnl1	3.60162e-10	-0.0275383	0.437	0.443	5.81949e-06	formin-like 1 [Source:MGI Symbol;Acc:MGI:1888994]
CD4+ memory T	Usp4	3.74412e-10	-0.0414912	0.267	0.286	6.04975e-06	ubiquitin specific peptidase 4 (proto-oncogene) [Source:MGI Symbol;Acc:MGI:98905]
CD4+ memory T	Ppp6r1	3.864e-10	-0.0283224	0.362	0.385	6.24346e-06	protein phosphatase 6, regulatory subunit 1 [Source:MGI Symbol;Acc:MGI:2442163]
CD4+ memory T	Sh3bp1	3.87139e-10	-0.0657488	0.205	0.247	6.25539e-06	SH3-domain binding protein 1 [Source:MGI Symbol;Acc:MGI:104603]
CD4+ memory T	Usp34	4.00873e-10	0.0056116	0.571	0.55	6.47731e-06	ubiquitin specific peptidase 34 [Source:MGI Symbol;Acc:MGI:109473]
CD4+ memory T	Dcaf7	4.07029e-10	-0.0708084	0.198	0.231	6.57677e-06	DDB1 and CUL4 associated factor 7 [Source:MGI Symbol;Acc:MGI:1919083]
CD4+ memory T	H2-Q4	4.0934e-10	0.359076	0.772	0.652	6.61411e-06	histocompatibility 2, Q region locus 4 [Source:MGI Symbol;Acc:MGI:95933]
CD4+ memory T	Helz	4.11608e-10	-0.0278199	0.348	0.356	6.65076e-06	helicase with zinc finger domain [Source:MGI Symbol;Acc:MGI:1925705]
CD4+ memory T	Pnrc2	4.34336e-10	-0.0425232	0.275	0.298	7.018e-06	proline-rich nuclear receptor coactivator 2 [Source:MGI Symbol;Acc:MGI:106512]
CD4+ memory T	Map4k1	4.43258e-10	-0.0637882	0.214	0.251	7.16217e-06	mitogen-activated protein kinase kinase kinase kinase 1 [Source:MGI Symbol;Acc:MGI:1346882]
CD4+ memory T	Atxn7	4.49167e-10	-0.0418639	0.281	0.301	7.25764e-06	ataxin 7 [Source:MGI Symbol;Acc:MGI:2179277]
CD4+ memory T	Usp16	4.54242e-10	-0.0457589	0.268	0.277	7.33965e-06	ubiquitin specific peptidase 16 [Source:MGI Symbol;Acc:MGI:1921362]
CD4+ memory T	Ppp1r15b	4.56196e-10	-0.0514994	0.24	0.271	7.37121e-06	protein phosphatase 1, regulatory subunit 15B [Source:MGI Symbol;Acc:MGI:2444211]
CD4+ memory T	Cers4	4.65591e-10	-0.0381798	0.394	0.398	7.52302e-06	ceramide synthase 4 [Source:MGI Symbol;Acc:MGI:1914510]
CD4+ memory T	Fcmr	4.92617e-10	-0.241497	0.1	0.171	7.95971e-06	Fc fragment of IgM receptor [Source:MGI Symbol;Acc:MGI:1916419]
CD4+ memory T	Acbd5	5.0353e-10	-0.0465503	0.255	0.277	8.13604e-06	acyl-Coenzyme A binding domain containing 5 [Source:MGI Symbol;Acc:MGI:1921409]
CD4+ memory T	Hspa9	5.12373e-10	-0.0564796	0.264	0.291	8.27893e-06	heat shock protein 9 [Source:MGI Symbol;Acc:MGI:96245]
CD4+ memory T	Tagln2	5.31028e-10	0.325586	0.488	0.4	8.58034e-06	transgelin 2 [Source:MGI Symbol;Acc:MGI:1312985]
CD4+ memory T	Trrap	5.36813e-10	-0.0513625	0.234	0.267	8.67382e-06	transformation/transcription domain-associated protein [Source:MGI Symbol;Acc:MGI:2153272]
CD4+ memory T	Sell	5.41277e-10	-0.132219	0.198	0.269	8.74595e-06	selectin, lymphocyte [Source:MGI Symbol;Acc:MGI:98279]
CD4+ memory T	Ccar1	5.44296e-10	-0.0251219	0.412	0.417	8.79473e-06	cell division cycle and apoptosis regulator 1 [Source:MGI Symbol;Acc:MGI:1914750]
CD4+ memory T	Oga	5.53791e-10	-0.0209865	0.413	0.434	8.94815e-06	O-GlcNAcase [Source:MGI Symbol;Acc:MGI:1932139]
CD4+ memory T	Cdc37l1	5.74457e-10	-0.0198879	0.418	0.418	9.28207e-06	cell division cycle 37-like 1 [Source:MGI Symbol;Acc:MGI:1914322]
CD4+ memory T	Trim5	5.77105e-10	-0.0417322	0.281	0.312	9.32487e-06	tripartite motif-containing 5 [Source:MGI Symbol;Acc:MGI:3646853]
CD4+ memory T	Rasgrp1	5.79528e-10	-0.0528361	0.298	0.335	9.36402e-06	RAS guanyl releasing protein 1 [Source:MGI Symbol;Acc:MGI:1314635]
CD4+ memory T	Tulp4	6.15805e-10	-0.0481666	0.248	0.268	9.95018e-06	tubby like protein 4 [Source:MGI Symbol;Acc:MGI:1916092]
CD4+ memory T	Ilrun	6.54837e-10	-0.0474218	0.246	0.273	1.05809e-05	inflammation and lipid regulator with UBA-like and NBR1-like domains [Source:MGI Symbol;Acc:MGI:106281]
CD4+ memory T	Pdpk1	6.67269e-10	-0.0389658	0.26	0.286	1.07817e-05	3-phosphoinositide dependent protein kinase 1 [Source:MGI Symbol;Acc:MGI:1338068]
CD4+ memory T	1600014C10Rik	7.11526e-10	-0.145923	0.118	0.186	1.14968e-05	RIKEN cDNA 1600014C10 gene [Source:MGI Symbol;Acc:MGI:1919494]
CD4+ memory T	Fbxo33	7.17351e-10	-0.0640943	0.211	0.248	1.1591e-05	F-box protein 33 [Source:MGI Symbol;Acc:MGI:1917861]
CD4+ memory T	Sbf1	7.346e-10	-0.0302219	0.288	0.305	1.18697e-05	SET binding factor 1 [Source:MGI Symbol;Acc:MGI:1925230]
CD4+ memory T	Nus1	7.45694e-10	-0.0787303	0.181	0.23	1.20489e-05	NUS1 dehydrodolichyl diphosphate synthase subunit [Source:MGI Symbol;Acc:MGI:1196365]
CD4+ memory T	Ccnl2	7.75706e-10	-0.012734	0.451	0.448	1.25339e-05	cyclin L2 [Source:MGI Symbol;Acc:MGI:1927119]
CD4+ memory T	Tmem127	7.7923e-10	-0.0482025	0.241	0.269	1.25908e-05	transmembrane protein 127 [Source:MGI Symbol;Acc:MGI:1916720]
CD4+ memory T	Cggbp1	7.97424e-10	-0.024977	0.386	0.405	1.28848e-05	CGG triplet repeat binding protein 1 [Source:MGI Symbol;Acc:MGI:2146370]
CD4+ memory T	Scai	8.04916e-10	-0.0761808	0.188	0.227	1.30058e-05	suppressor of cancer cell invasion [Source:MGI Symbol;Acc:MGI:2443716]
CD4+ memory T	Riok1	8.15529e-10	-0.0453431	0.261	0.29	1.31773e-05	RIO kinase 1 [Source:MGI Symbol;Acc:MGI:1918590]
CD4+ memory T	Clk4	8.62694e-10	-0.0166284	0.376	0.393	1.39394e-05	CDC like kinase 4 [Source:MGI Symbol;Acc:MGI:1098551]
CD4+ memory T	Nr2c2	8.63798e-10	-0.0249845	0.354	0.37	1.39572e-05	nuclear receptor subfamily 2, group C, member 2 [Source:MGI Symbol;Acc:MGI:1352466]
CD4+ memory T	Nelfb	8.64453e-10	-0.050576	0.219	0.245	1.39678e-05	negative elongation factor complex member B [Source:MGI Symbol;Acc:MGI:1931035]
CD4+ memory T	Mgat1	9.17741e-10	-0.0805964	0.169	0.223	1.48289e-05	mannoside acetylglucosaminyltransferase 1 [Source:MGI Symbol;Acc:MGI:96973]
CD4+ memory T	Cs	9.25023e-10	-0.0433281	0.265	0.288	1.49465e-05	citrate synthase [Source:MGI Symbol;Acc:MGI:88529]
CD4+ memory T	Zfp740	9.32176e-10	-0.0416989	0.242	0.265	1.50621e-05	zinc finger protein 740 [Source:MGI Symbol;Acc:MGI:1915994]
CD4+ memory T	Rb1cc1	9.57227e-10	-0.00322465	0.478	0.492	1.54669e-05	RB1-inducible coiled-coil 1 [Source:MGI Symbol;Acc:MGI:1341850]
CD4+ memory T	Tcf4	9.74606e-10	-0.207616	0.119	0.189	1.57477e-05	transcription factor 4 [Source:MGI Symbol;Acc:MGI:98506]
CD4+ memory T	Gm11808	1.00691e-09	0.323687	0.362	0.208	1.62696e-05	predicted gene 11808 [Source:MGI Symbol;Acc:MGI:3649356]
CD4+ memory T	Mdm2	1.01127e-09	-0.0499545	0.218	0.254	1.63401e-05	transformed mouse 3T3 cell double minute 2 [Source:MGI Symbol;Acc:MGI:96952]
CD4+ memory T	Rpl22l1	1.01905e-09	0.435348	0.764	0.696	1.64658e-05	ribosomal protein L22 like 1 [Source:MGI Symbol;Acc:MGI:1915278]
CD4+ memory T	Gapvd1	1.0319e-09	-0.0283912	0.306	0.325	1.66735e-05	GTPase activating protein and VPS9 domains 1 [Source:MGI Symbol;Acc:MGI:1913941]
CD4+ memory T	Nrp1	1.06967e-09	0.041981	0.683	0.655	1.72838e-05	neuropilin 1 [Source:MGI Symbol;Acc:MGI:106206]
CD4+ memory T	Fcer2a	1.08556e-09	-0.224962	0.082	0.168	1.75405e-05	Fc receptor, IgE, low affinity II, alpha polypeptide [Source:MGI Symbol;Acc:MGI:95497]
CD4+ memory T	Fam160b1	1.08726e-09	-0.0671667	0.192	0.239	1.7568e-05	family with sequence similarity 160, member B1 [Source:MGI Symbol;Acc:MGI:2147545]
CD4+ memory T	Ube2z	1.13937e-09	-0.0429978	0.228	0.268	1.84099e-05	ubiquitin-conjugating enzyme E2Z [Source:MGI Symbol;Acc:MGI:1343160]
CD4+ memory T	Gse1	1.2e-09	-0.093047	0.154	0.211	1.93895e-05	genetic suppressor element 1, coiled-coil protein [Source:MGI Symbol;Acc:MGI:1098275]
CD4+ memory T	Eif4g1	1.23413e-09	-0.0141341	0.453	0.464	1.9941e-05	eukaryotic translation initiation factor 4, gamma 1 [Source:MGI Symbol;Acc:MGI:2384784]
CD4+ memory T	Mdfic	1.32935e-09	-0.0367555	0.301	0.323	2.14796e-05	MyoD family inhibitor domain containing [Source:MGI Symbol;Acc:MGI:104611]
CD4+ memory T	Arap1	1.40761e-09	-0.10408	0.142	0.204	2.27442e-05	ArfGAP with RhoGAP domain, ankyrin repeat and PH domain 1 [Source:MGI Symbol;Acc:MGI:1916960]
CD4+ memory T	Rbm33	1.41642e-09	-0.02853	0.31	0.314	2.28865e-05	RNA binding motif protein 33 [Source:MGI Symbol;Acc:MGI:1919670]
CD4+ memory T	Sh3bgrl	1.45786e-09	-0.0255088	0.418	0.429	2.35561e-05	SH3-binding domain glutamic acid-rich protein like [Source:MGI Symbol;Acc:MGI:1930849]
CD4+ memory T	Klf3	1.47712e-09	-0.0255307	0.45	0.465	2.38673e-05	Kruppel-like factor 3 (basic) [Source:MGI Symbol;Acc:MGI:1342773]
CD4+ memory T	Ap1g1	1.49527e-09	-0.0725212	0.174	0.227	2.41606e-05	adaptor protein complex AP-1, gamma 1 subunit [Source:MGI Symbol;Acc:MGI:101919]
CD4+ memory T	Prdm2	1.49831e-09	-0.0278696	0.307	0.34	2.42097e-05	PR domain containing 2, with ZNF domain [Source:MGI Symbol;Acc:MGI:107628]
CD4+ memory T	Pik3ca	1.50655e-09	-0.0309589	0.299	0.33	2.43428e-05	phosphatidylinositol-4,5-bisphosphate 3-kinase catalytic subunit alpha [Source:MGI Symbol;Acc:MGI:1206581]
CD4+ memory T	Rnf114	1.50799e-09	-0.0371504	0.309	0.328	2.43661e-05	ring finger protein 114 [Source:MGI Symbol;Acc:MGI:1933159]
CD4+ memory T	Ip6k1	1.51185e-09	-0.0319978	0.278	0.298	2.44284e-05	inositol hexaphosphate kinase 1 [Source:MGI Symbol;Acc:MGI:1351633]
CD4+ memory T	Pxk	1.51714e-09	-0.102362	0.169	0.214	2.45139e-05	PX domain containing serine/threonine kinase [Source:MGI Symbol;Acc:MGI:1289230]
CD4+ memory T	Arhgap5	1.57015e-09	-0.019978	0.397	0.415	2.53705e-05	Rho GTPase activating protein 5 [Source:MGI Symbol;Acc:MGI:1332637]
CD4+ memory T	Ankrd13c	1.57048e-09	-0.0614706	0.203	0.238	2.53757e-05	ankyrin repeat domain 13c [Source:MGI Symbol;Acc:MGI:2139746]
CD4+ memory T	Pkp3	1.57862e-09	0.308088	0.49	0.355	2.55074e-05	plakophilin 3 [Source:MGI Symbol;Acc:MGI:1891830]
CD4+ memory T	Ecpas	1.59908e-09	-0.0371949	0.266	0.288	2.58379e-05	Ecm29 proteasome adaptor and scaffold [Source:MGI Symbol;Acc:MGI:2140220]
CD4+ memory T	Zfand5	1.60854e-09	-0.0431792	0.331	0.333	2.59908e-05	zinc finger, AN1-type domain 5 [Source:MGI Symbol;Acc:MGI:1278334]
CD4+ memory T	Cdk13	1.64955e-09	-0.0108275	0.389	0.397	2.66535e-05	cyclin-dependent kinase 13 [Source:MGI Symbol;Acc:MGI:1916812]
CD4+ memory T	Ptger4	1.6646e-09	-0.0605425	0.26	0.278	2.68965e-05	prostaglandin E receptor 4 (subtype EP4) [Source:MGI Symbol;Acc:MGI:104311]
CD4+ memory T	Sgms1	1.75338e-09	-0.0605867	0.222	0.251	2.83311e-05	sphingomyelin synthase 1 [Source:MGI Symbol;Acc:MGI:2444110]
CD4+ memory T	Ewsr1	1.76962e-09	-0.0100172	0.572	0.551	2.85935e-05	Ewing sarcoma breakpoint region 1 [Source:MGI Symbol;Acc:MGI:99960]
CD4+ memory T	Usp38	1.84445e-09	-0.0504538	0.236	0.265	2.98026e-05	ubiquitin specific peptidase 38 [Source:MGI Symbol;Acc:MGI:1922091]
CD4+ memory T	Pag1	1.91258e-09	-0.069456	0.188	0.235	3.09035e-05	phosphoprotein associated with glycosphingolipid microdomains 1 [Source:MGI Symbol;Acc:MGI:2443160]
CD4+ memory T	Poldip3	1.91953e-09	-0.0270525	0.269	0.292	3.10157e-05	polymerase (DNA-directed), delta interacting protein 3 [Source:MGI Symbol;Acc:MGI:1921076]
CD4+ memory T	Pbxip1	1.92378e-09	-0.0103972	0.496	0.496	3.10845e-05	pre B cell leukemia transcription factor interacting protein 1 [Source:MGI Symbol;Acc:MGI:2441670]
CD4+ memory T	Noc2l	1.92936e-09	-0.0637397	0.215	0.249	3.11747e-05	NOC2 like nucleolar associated transcriptional repressor [Source:MGI Symbol;Acc:MGI:1931051]
CD4+ memory T	Nras	1.97482e-09	-0.0397891	0.258	0.282	3.19092e-05	neuroblastoma ras oncogene [Source:MGI Symbol;Acc:MGI:97376]
CD4+ memory T	Smc4	2.04047e-09	0.0115301	0.662	0.667	3.29699e-05	structural maintenance of chromosomes 4 [Source:MGI Symbol;Acc:MGI:1917349]
CD4+ memory T	Cisd2	2.08046e-09	-0.0164078	0.382	0.392	3.36161e-05	CDGSH iron sulfur domain 2 [Source:MGI Symbol;Acc:MGI:1914256]
CD4+ memory T	Snx2	2.10975e-09	-0.0437953	0.313	0.333	3.40894e-05	sorting nexin 2 [Source:MGI Symbol;Acc:MGI:1915054]
CD4+ memory T	Clk1	2.1255e-09	0.0490303	0.744	0.724	3.43439e-05	CDC-like kinase 1 [Source:MGI Symbol;Acc:MGI:107403]
CD4+ memory T	Clec2i	2.16366e-09	-0.0380019	0.305	0.325	3.49604e-05	C-type lectin domain family 2, member i [Source:MGI Symbol;Acc:MGI:2136650]
CD4+ memory T	Lman2l	2.17688e-09	-0.157738	0.081	0.184	3.5174e-05	lectin, mannose-binding 2-like [Source:MGI Symbol;Acc:MGI:2443010]
CD4+ memory T	Bcor	2.23144e-09	-0.0409382	0.28	0.303	3.60555e-05	BCL6 interacting corepressor [Source:MGI Symbol;Acc:MGI:1918708]
CD4+ memory T	Actn4	2.26547e-09	-0.0193858	0.353	0.362	3.66054e-05	actinin alpha 4 [Source:MGI Symbol;Acc:MGI:1890773]
CD4+ memory T	Pds5b	2.30843e-09	-0.0566273	0.215	0.247	3.72997e-05	PDS5 cohesin associated factor B [Source:MGI Symbol;Acc:MGI:2140945]
CD4+ memory T	Polr2m	2.34644e-09	-0.0187265	0.34	0.357	3.79138e-05	polymerase (RNA) II (DNA directed) polypeptide M [Source:MGI Symbol;Acc:MGI:107282]
CD4+ memory T	Wdr82	2.35501e-09	-0.0443579	0.248	0.268	3.80522e-05	WD repeat domain containing 82 [Source:MGI Symbol;Acc:MGI:1924555]
CD4+ memory T	Ehmt2	2.37761e-09	-0.0367836	0.252	0.289	3.84175e-05	euchromatic histone lysine N-methyltransferase 2 [Source:MGI Symbol;Acc:MGI:2148922]
CD4+ memory T	Mepce	2.43501e-09	-0.0524801	0.218	0.248	3.9345e-05	methylphosphate capping enzyme [Source:MGI Symbol;Acc:MGI:106477]
CD4+ memory T	Tespa1	2.48072e-09	0.017262	0.532	0.532	4.00834e-05	thymocyte expressed, positive selection associated 1 [Source:MGI Symbol;Acc:MGI:1914846]
CD4+ memory T	Rspry1	2.55813e-09	-0.0358622	0.25	0.273	4.13343e-05	ring finger and SPRY domain containing 1 [Source:MGI Symbol;Acc:MGI:1914860]
CD4+ memory T	Tomm34	2.56789e-09	-0.0437127	0.229	0.259	4.1492e-05	translocase of outer mitochondrial membrane 34 [Source:MGI Symbol;Acc:MGI:1914395]
CD4+ memory T	Hipk3	2.6153e-09	-0.0783617	0.173	0.212	4.2258e-05	homeodomain interacting protein kinase 3 [Source:MGI Symbol;Acc:MGI:1314882]
CD4+ memory T	Hnrnph2	2.62587e-09	-0.0400658	0.264	0.286	4.24288e-05	heterogeneous nuclear ribonucleoprotein H2 [Source:MGI Symbol;Acc:MGI:1201779]
CD4+ memory T	Cdkn2aipnl	2.66075e-09	-0.0628748	0.197	0.23	4.29924e-05	CDKN2A interacting protein N-terminal like [Source:MGI Symbol;Acc:MGI:1261797]
CD4+ memory T	Spopl	2.69206e-09	-0.0592979	0.212	0.239	4.34983e-05	speckle-type BTB/POZ protein-like [Source:MGI Symbol;Acc:MGI:1924107]
CD4+ memory T	Rif1	2.69335e-09	-0.0252106	0.373	0.398	4.35191e-05	replication timing regulatory factor 1 [Source:MGI Symbol;Acc:MGI:1098622]
CD4+ memory T	Tnfrsf18	2.69689e-09	0.351687	0.552	0.419	4.35763e-05	tumor necrosis factor receptor superfamily, member 18 [Source:MGI Symbol;Acc:MGI:894675]
CD4+ memory T	Xpr1	2.72757e-09	-0.0376689	0.267	0.296	4.40721e-05	xenotropic and polytropic retrovirus receptor 1 [Source:MGI Symbol;Acc:MGI:97932]
CD4+ memory T	Adnp	2.77349e-09	-0.0247814	0.332	0.346	4.48141e-05	activity-dependent neuroprotective protein [Source:MGI Symbol;Acc:MGI:1338758]
CD4+ memory T	Eps15	2.79719e-09	-0.031043	0.28	0.295	4.5197e-05	epidermal growth factor receptor pathway substrate 15 [Source:MGI Symbol;Acc:MGI:104583]
CD4+ memory T	Psme3	2.80569e-09	-0.082137	0.176	0.217	4.53343e-05	proteaseome (prosome, macropain) activator subunit 3 (PA28 gamma, Ki) [Source:MGI Symbol;Acc:MGI:1096366]
CD4+ memory T	Blk	2.81876e-09	-0.210608	0.061	0.172	4.55455e-05	B lymphoid kinase [Source:MGI Symbol;Acc:MGI:88169]
CD4+ memory T	Efcab14	2.88017e-09	-0.048864	0.215	0.248	4.65378e-05	EF-hand calcium binding domain 14 [Source:MGI Symbol;Acc:MGI:2442397]
CD4+ memory T	Cct3	2.89973e-09	-0.0249153	0.372	0.381	4.68538e-05	chaperonin containing Tcp1, subunit 3 (gamma) [Source:MGI Symbol;Acc:MGI:104708]
CD4+ memory T	Ltb	2.93127e-09	0.434513	0.918	0.875	4.73635e-05	lymphotoxin B [Source:MGI Symbol;Acc:MGI:104796]
CD4+ memory T	Trmt1l	2.95271e-09	-0.0311183	0.266	0.294	4.77099e-05	tRNA methyltransferase 1 like [Source:MGI Symbol;Acc:MGI:1916185]
CD4+ memory T	Hip1r	2.96005e-09	-0.0644125	0.194	0.235	4.78285e-05	huntingtin interacting protein 1 related [Source:MGI Symbol;Acc:MGI:1352504]
CD4+ memory T	Tpt1	3.00526e-09	0.5174	0.982	0.984	4.8559e-05	tumor protein, translationally-controlled 1 [Source:MGI Symbol;Acc:MGI:104890]
CD4+ memory T	Lpar6	3.00906e-09	-0.0356455	0.316	0.329	4.86203e-05	lysophosphatidic acid receptor 6 [Source:MGI Symbol;Acc:MGI:1914418]
CD4+ memory T	Socs4	3.02499e-09	-0.0528445	0.209	0.248	4.88778e-05	suppressor of cytokine signaling 4 [Source:MGI Symbol;Acc:MGI:1914546]
CD4+ memory T	Rnpepl1	3.04393e-09	-0.0306078	0.279	0.29	4.91838e-05	arginyl aminopeptidase (aminopeptidase B)-like 1 [Source:MGI Symbol;Acc:MGI:1914170]
CD4+ memory T	Ube3c	3.18656e-09	-0.0627358	0.194	0.226	5.14884e-05	ubiquitin protein ligase E3C [Source:MGI Symbol;Acc:MGI:2140998]
CD4+ memory T	Copa	3.21506e-09	-0.0184665	0.39	0.388	5.1949e-05	coatomer protein complex subunit alpha [Source:MGI Symbol;Acc:MGI:1334462]
CD4+ memory T	Lax1	3.24615e-09	-0.0310571	0.318	0.335	5.24513e-05	lymphocyte transmembrane adaptor 1 [Source:MGI Symbol;Acc:MGI:2443362]
CD4+ memory T	Hnrnpa0	3.28448e-09	0.0298027	0.666	0.667	5.30707e-05	heterogeneous nuclear ribonucleoprotein A0 [Source:MGI Symbol;Acc:MGI:1924384]
CD4+ memory T	Ensa	3.29168e-09	-0.0273023	0.285	0.3	5.3187e-05	endosulfine alpha [Source:MGI Symbol;Acc:MGI:1891189]
CD4+ memory T	Ireb2	3.31394e-09	-0.056264	0.208	0.238	5.35467e-05	iron responsive element binding protein 2 [Source:MGI Symbol;Acc:MGI:1928268]
CD4+ memory T	M6pr	3.33201e-09	-0.00959386	0.398	0.417	5.38387e-05	mannose-6-phosphate receptor, cation dependent [Source:MGI Symbol;Acc:MGI:96904]
CD4+ memory T	Zc3h7a	3.42346e-09	-0.0098479	0.43	0.43	5.53162e-05	zinc finger CCCH type containing 7 A [Source:MGI Symbol;Acc:MGI:2445044]
CD4+ memory T	Ncoa2	3.44218e-09	-0.0292362	0.295	0.315	5.56188e-05	nuclear receptor coactivator 2 [Source:MGI Symbol;Acc:MGI:1276533]
CD4+ memory T	Arl4c	3.44725e-09	-0.0421462	0.374	0.399	5.57007e-05	ADP-ribosylation factor-like 4C [Source:MGI Symbol;Acc:MGI:2445172]
CD4+ memory T	Smg7	3.46758e-09	-0.0615498	0.194	0.229	5.60292e-05	Smg-7 homolog, nonsense mediated mRNA decay factor (C. elegans) [Source:MGI Symbol;Acc:MGI:2682334]
CD4+ memory T	Erbin	3.4956e-09	-0.00798571	0.453	0.461	5.64819e-05	Erbb2 interacting protein [Source:MGI Symbol;Acc:MGI:1890169]
CD4+ memory T	Cct7	3.49904e-09	-0.0193698	0.39	0.412	5.65375e-05	chaperonin containing Tcp1, subunit 7 (eta) [Source:MGI Symbol;Acc:MGI:107184]
CD4+ memory T	Itpr3	3.50996e-09	-0.069194	0.182	0.224	5.6714e-05	inositol 1,4,5-triphosphate receptor 3 [Source:MGI Symbol;Acc:MGI:96624]
CD4+ memory T	Gpm6b	3.78126e-09	-0.0343827	0.405	0.434	6.10976e-05	glycoprotein m6b [Source:MGI Symbol;Acc:MGI:107672]
CD4+ memory T	Cnot3	3.81952e-09	-0.0197089	0.367	0.382	6.17158e-05	CCR4-NOT transcription complex, subunit 3 [Source:MGI Symbol;Acc:MGI:2385261]
CD4+ memory T	Ubfd1	3.85297e-09	-0.110002	0.125	0.2	6.22562e-05	ubiquitin family domain containing 1 [Source:MGI Symbol;Acc:MGI:107301]
CD4+ memory T	Rap2c	4.00505e-09	-0.0548533	0.212	0.247	6.47136e-05	RAP2C, member of RAS oncogene family [Source:MGI Symbol;Acc:MGI:1919315]
CD4+ memory T	Arhgef6	4.03331e-09	-0.0175642	0.328	0.337	6.51702e-05	Rac/Cdc42 guanine nucleotide exchange factor (GEF) 6 [Source:MGI Symbol;Acc:MGI:1920591]
CD4+ memory T	Nae1	4.0931e-09	-0.0437422	0.222	0.25	6.61363e-05	NEDD8 activating enzyme E1 subunit 1 [Source:MGI Symbol;Acc:MGI:2384561]
CD4+ memory T	2022-03-06	4.11689e-09	-0.0622222	0.187	0.227	6.65208e-05	NA
CD4+ memory T	Tomm70a	4.28733e-09	-0.0309675	0.277	0.286	6.92747e-05	translocase of outer mitochondrial membrane 70A [Source:MGI Symbol;Acc:MGI:106295]
CD4+ memory T	Stap1	4.45741e-09	-0.0529751	0.368	0.37	7.20228e-05	signal transducing adaptor family member 1 [Source:MGI Symbol;Acc:MGI:1926193]
CD4+ memory T	Srebf2	4.64068e-09	-0.0408335	0.273	0.29	7.4984e-05	sterol regulatory element binding factor 2 [Source:MGI Symbol;Acc:MGI:107585]
CD4+ memory T	Lrp10	4.65809e-09	0.0115122	0.569	0.569	7.52654e-05	low-density lipoprotein receptor-related protein 10 [Source:MGI Symbol;Acc:MGI:1929480]
CD4+ memory T	Mapk1ip1l	4.69035e-09	-0.0355232	0.263	0.283	7.57867e-05	mitogen-activated protein kinase 1 interacting protein 1-like [Source:MGI Symbol;Acc:MGI:2444022]
CD4+ memory T	Ankrd12	4.74627e-09	0.0520015	0.783	0.79	7.66902e-05	ankyrin repeat domain 12 [Source:MGI Symbol;Acc:MGI:1914357]
CD4+ memory T	Bbx	4.95291e-09	-0.0303612	0.284	0.304	8.00291e-05	bobby sox HMG box containing [Source:MGI Symbol;Acc:MGI:1917758]
CD4+ memory T	Rapgef6	5.01234e-09	0.0332974	0.672	0.644	8.09894e-05	Rap guanine nucleotide exchange factor (GEF) 6 [Source:MGI Symbol;Acc:MGI:2384761]
CD4+ memory T	C1galt1	5.10437e-09	-0.0480416	0.216	0.245	8.24765e-05	core 1 synthase, glycoprotein-N-acetylgalactosamine 3-beta-galactosyltransferase, 1 [Source:MGI Symbol;Acc:MGI:2151071]
CD4+ memory T	Brd3	5.21494e-09	-0.0477998	0.231	0.257	8.4263e-05	bromodomain containing 3 [Source:MGI Symbol;Acc:MGI:1914632]
CD4+ memory T	Csnk2a2	5.46115e-09	-0.0351156	0.263	0.286	8.82412e-05	casein kinase 2, alpha prime polypeptide [Source:MGI Symbol;Acc:MGI:88547]
CD4+ memory T	Pigt	5.51921e-09	-0.0448297	0.218	0.245	8.91793e-05	phosphatidylinositol glycan anchor biosynthesis, class T [Source:MGI Symbol;Acc:MGI:1926178]
CD4+ memory T	Otud7b	5.74675e-09	-0.0468901	0.222	0.256	9.2856e-05	OTU domain containing 7B [Source:MGI Symbol;Acc:MGI:2654703]
CD4+ memory T	Cul3	5.91099e-09	-0.011608	0.412	0.423	9.55098e-05	cullin 3 [Source:MGI Symbol;Acc:MGI:1347360]
CD4+ memory T	Dusp11	5.93599e-09	-0.00221433	0.461	0.472	9.59138e-05	dual specificity phosphatase 11 (RNA/RNP complex 1-interacting) [Source:MGI Symbol;Acc:MGI:1919352]
CD4+ memory T	Nr3c1	5.99816e-09	-0.0224502	0.403	0.41	9.69182e-05	nuclear receptor subfamily 3, group C, member 1 [Source:MGI Symbol;Acc:MGI:95824]
CD4+ memory T	Zyg11b	6.0953e-09	-0.0653331	0.191	0.225	9.84879e-05	zyg-ll family member B, cell cycle regulator [Source:MGI Symbol;Acc:MGI:2685277]
CD4+ memory T	Sdha	6.23813e-09	-0.0148338	0.408	0.42	0.000100796	succinate dehydrogenase complex, subunit A, flavoprotein (Fp) [Source:MGI Symbol;Acc:MGI:1914195]
CD4+ memory T	Bcl11a	6.24027e-09	-0.282287	0.085	0.153	0.00010083	B cell CLL/lymphoma 11A (zinc finger protein) [Source:MGI Symbol;Acc:MGI:106190]
CD4+ memory T	Tmed5	6.36334e-09	-0.0190233	0.399	0.395	0.000102819	transmembrane p24 trafficking protein 5 [Source:MGI Symbol;Acc:MGI:1921586]
CD4+ memory T	Foxo1	6.46852e-09	-0.0257465	0.351	0.37	0.000104518	forkhead box O1 [Source:MGI Symbol;Acc:MGI:1890077]
CD4+ memory T	Rps9	6.49622e-09	0.110343	0.976	0.975	0.000104966	ribosomal protein S9 [Source:MGI Symbol;Acc:MGI:1924096]
CD4+ memory T	Slc5a3	6.54198e-09	-0.112183	0.131	0.196	0.000105705	solute carrier family 5 (inositol transporters), member 3 [Source:MGI Symbol;Acc:MGI:1858226]
CD4+ memory T	Neat1	6.89168e-09	-0.00744495	0.484	0.493	0.000111356	nuclear paraspeckle assembly transcript 1 (non-protein coding) [Source:MGI Symbol;Acc:MGI:1914211]
CD4+ memory T	Dhx9	6.98339e-09	-0.0173532	0.377	0.389	0.000112838	DEAH (Asp-Glu-Ala-His) box polypeptide 9 [Source:MGI Symbol;Acc:MGI:108177]
CD4+ memory T	Retreg3	7.01278e-09	-0.0501498	0.206	0.237	0.000113312	reticulophagy regulator family member 3 [Source:MGI Symbol;Acc:MGI:1915248]
CD4+ memory T	Pwwp2a	7.03379e-09	-0.0424359	0.233	0.265	0.000113652	PWWP domain containing 2A [Source:MGI Symbol;Acc:MGI:1918052]
CD4+ memory T	Map2k7	7.31688e-09	-0.0734748	0.168	0.212	0.000118226	mitogen-activated protein kinase kinase 7 [Source:MGI Symbol;Acc:MGI:1346871]
CD4+ memory T	Hook3	7.44692e-09	-0.0171011	0.404	0.409	0.000120327	hook microtubule tethering protein 3 [Source:MGI Symbol;Acc:MGI:2443554]
CD4+ memory T	Mtmr3	7.64418e-09	-0.0380123	0.246	0.262	0.000123515	myotubularin related protein 3 [Source:MGI Symbol;Acc:MGI:1921552]
CD4+ memory T	Atp5j	7.73288e-09	0.342935	0.648	0.531	0.000124948	ATP synthase, H+ transporting, mitochondrial F0 complex, subunit F [Source:MGI Symbol;Acc:MGI:107777]
CD4+ memory T	Taf10	7.91206e-09	0.301168	0.546	0.412	0.000127843	TATA-box binding protein associated factor 10 [Source:MGI Symbol;Acc:MGI:1346320]
CD4+ memory T	Pik3cd	7.98759e-09	-0.0160872	0.405	0.422	0.000129064	phosphatidylinositol-4,5-bisphosphate 3-kinase catalytic subunit delta [Source:MGI Symbol;Acc:MGI:1098211]
CD4+ memory T	Tuba1b	8.15548e-09	-0.02222	0.462	0.467	0.000131776	tubulin, alpha 1B [Source:MGI Symbol;Acc:MGI:107804]
CD4+ memory T	Appbp2	8.23738e-09	-0.0599636	0.192	0.224	0.0001331	amyloid beta precursor protein (cytoplasmic tail) binding protein 2 [Source:MGI Symbol;Acc:MGI:1914134]
CD4+ memory T	Atp13a3	8.32914e-09	-0.031651	0.272	0.287	0.000134582	ATPase type 13A3 [Source:MGI Symbol;Acc:MGI:2685387]
CD4+ memory T	Rasal3	8.43242e-09	0.000982865	0.506	0.497	0.000136251	RAS protein activator like 3 [Source:MGI Symbol;Acc:MGI:2444128]
CD4+ memory T	Gcn1	8.82541e-09	-0.0300961	0.246	0.267	0.000142601	GCN1 activator of EIF2AK4 [Source:MGI Symbol;Acc:MGI:2444248]
CD4+ memory T	Mindy2	9.07174e-09	-0.0464141	0.237	0.254	0.000146581	MINDY lysine 48 deubiquitinase 2 [Source:MGI Symbol;Acc:MGI:2443086]
CD4+ memory T	Setx	9.08302e-09	-0.0138522	0.412	0.419	0.000146763	senataxin [Source:MGI Symbol;Acc:MGI:2443480]
CD4+ memory T	Itgav	9.15921e-09	-0.041372	0.242	0.264	0.000147994	integrin alpha V [Source:MGI Symbol;Acc:MGI:96608]
CD4+ memory T	Nup153	9.55721e-09	-0.0201512	0.34	0.346	0.000154425	nucleoporin 153 [Source:MGI Symbol;Acc:MGI:2385621]
CD4+ memory T	Ctsc	9.94924e-09	-0.0710659	0.192	0.223	0.00016076	cathepsin C [Source:MGI Symbol;Acc:MGI:109553]
CD4+ memory T	Trpm7	1.00481e-08	-0.0160313	0.325	0.325	0.000162357	transient receptor potential cation channel, subfamily M, member 7 [Source:MGI Symbol;Acc:MGI:1929996]
CD4+ memory T	Rpl10a	1.02409e-08	0.475918	0.912	0.898	0.000165472	ribosomal protein L10A [Source:MGI Symbol;Acc:MGI:1343877]
CD4+ memory T	Podnl1	1.05308e-08	0.292266	0.408	0.275	0.000170157	podocan-like 1 [Source:MGI Symbol;Acc:MGI:2685352]
CD4+ memory T	Ndufv3	1.06911e-08	0.290296	0.506	0.378	0.000172747	NADH:ubiquinone oxidoreductase core subunit V3 [Source:MGI Symbol;Acc:MGI:1890894]
CD4+ memory T	Rpl39	1.09524e-08	0.529331	0.956	0.958	0.000176969	ribosomal protein L39 [Source:MGI Symbol;Acc:MGI:1914498]
CD4+ memory T	Ski	1.12185e-08	-0.010045	0.398	0.397	0.000181268	ski sarcoma viral oncogene homolog (avian) [Source:MGI Symbol;Acc:MGI:98310]
CD4+ memory T	Bin1	1.14004e-08	-0.0249293	0.334	0.339	0.000184208	bridging integrator 1 [Source:MGI Symbol;Acc:MGI:108092]
CD4+ memory T	Cox6c	1.14886e-08	0.383252	0.756	0.664	0.000185632	cytochrome c oxidase subunit 6C [Source:MGI Symbol;Acc:MGI:104614]
CD4+ memory T	Hdgf	1.16714e-08	-0.0200829	0.341	0.363	0.000188586	heparin binding growth factor [Source:MGI Symbol;Acc:MGI:1194494]
CD4+ memory T	Man2b1	1.19646e-08	-0.02046	0.33	0.344	0.000193324	mannosidase 2, alpha B1 [Source:MGI Symbol;Acc:MGI:107286]
CD4+ memory T	Atp5c1	1.20425e-08	0.309098	0.56	0.428	0.000194584	ATP synthase, H+ transporting, mitochondrial F1 complex, gamma polypeptide 1 [Source:MGI Symbol;Acc:MGI:1261437]
CD4+ memory T	Mfsd6	1.20963e-08	-0.0656825	0.188	0.221	0.000195453	major facilitator superfamily domain containing 6 [Source:MGI Symbol;Acc:MGI:1922925]
CD4+ memory T	Crk	1.22143e-08	-0.0341576	0.237	0.254	0.000197359	v-crk avian sarcoma virus CT10 oncogene homolog [Source:MGI Symbol;Acc:MGI:88508]
CD4+ memory T	Trac	1.22546e-08	0.439707	0.873	0.781	0.000198011	T cell receptor alpha constant [Source:MGI Symbol;Acc:MGI:4439838]
CD4+ memory T	Atf7	1.24337e-08	-0.058612	0.189	0.226	0.000200905	activating transcription factor 7 [Source:MGI Symbol;Acc:MGI:2443472]
CD4+ memory T	Tgfbr2	1.24539e-08	-0.00900167	0.422	0.416	0.00020123	transforming growth factor, beta receptor II [Source:MGI Symbol;Acc:MGI:98729]
CD4+ memory T	Lrif1	1.26138e-08	-0.0123668	0.35	0.37	0.000203814	ligand dependent nuclear receptor interacting factor 1 [Source:MGI Symbol;Acc:MGI:2445214]
CD4+ memory T	Gtf2i	1.26244e-08	-0.0117524	0.381	0.373	0.000203985	general transcription factor II I [Source:MGI Symbol;Acc:MGI:1202722]
CD4+ memory T	Cdv3	1.33544e-08	-0.0237904	0.357	0.364	0.00021578	carnitine deficiency-associated gene expressed in ventricle 3 [Source:MGI Symbol;Acc:MGI:2448759]
CD4+ memory T	Ing1	1.35027e-08	-0.0232463	0.311	0.327	0.000218177	inhibitor of growth family, member 1 [Source:MGI Symbol;Acc:MGI:1349481]
CD4+ memory T	Klhl9	1.37238e-08	-0.08279	0.154	0.209	0.000221749	kelch-like 9 [Source:MGI Symbol;Acc:MGI:2180122]
CD4+ memory T	Dhx30	1.37589e-08	-0.0518625	0.207	0.232	0.000222317	DEAH (Asp-Glu-Ala-His) box polypeptide 30 [Source:MGI Symbol;Acc:MGI:1920081]
CD4+ memory T	Fli1	1.39445e-08	-0.0309398	0.334	0.35	0.000225316	Friend leukemia integration 1 [Source:MGI Symbol;Acc:MGI:95554]
CD4+ memory T	Ilf3	1.40508e-08	-0.0408041	0.222	0.25	0.000227033	interleukin enhancer binding factor 3 [Source:MGI Symbol;Acc:MGI:1339973]
CD4+ memory T	Atad2	1.4193e-08	-0.0266031	0.273	0.297	0.000229331	ATPase family, AAA domain containing 2 [Source:MGI Symbol;Acc:MGI:1917722]
CD4+ memory T	Vezf1	1.44001e-08	-0.0191269	0.324	0.329	0.000232677	vascular endothelial zinc finger 1 [Source:MGI Symbol;Acc:MGI:1313291]
CD4+ memory T	Lfng	1.47191e-08	-0.0188222	0.377	0.392	0.000237831	LFNG O-fucosylpeptide 3-beta-N-acetylglucosaminyltransferase [Source:MGI Symbol;Acc:MGI:1095413]
CD4+ memory T	Rab6a	1.48189e-08	-0.0497816	0.211	0.235	0.000239444	RAB6A, member RAS oncogene family [Source:MGI Symbol;Acc:MGI:894313]
CD4+ memory T	Ifnar1	1.55362e-08	-0.0271872	0.289	0.304	0.000251034	interferon (alpha and beta) receptor 1 [Source:MGI Symbol;Acc:MGI:107658]
CD4+ memory T	Rnasek	1.5691e-08	0.290783	0.549	0.398	0.000253535	ribonuclease, RNase K [Source:MGI Symbol;Acc:MGI:106369]
CD4+ memory T	Zfp706	1.57682e-08	-0.014543	0.43	0.418	0.000254782	zinc finger protein 706 [Source:MGI Symbol;Acc:MGI:1915286]
CD4+ memory T	Riok3	1.61292e-08	-0.00377111	0.404	0.399	0.000260615	RIO kinase 3 [Source:MGI Symbol;Acc:MGI:1914128]
CD4+ memory T	2610037D02Rik	1.64163e-08	-0.0488567	0.217	0.237	0.000265255	RIKEN cDNA 2610037D02 gene [Source:MGI Symbol;Acc:MGI:1917290]
CD4+ memory T	Jak1	1.6627e-08	0.0623782	0.752	0.741	0.000268659	Janus kinase 1 [Source:MGI Symbol;Acc:MGI:96628]
CD4+ memory T	Capzb	1.66297e-08	0.00512046	0.609	0.615	0.000268703	capping protein (actin filament) muscle Z-line, beta [Source:MGI Symbol;Acc:MGI:104652]
CD4+ memory T	Rapgef1	1.67313e-08	-0.0209244	0.301	0.307	0.000270344	Rap guanine nucleotide exchange factor (GEF) 1 [Source:MGI Symbol;Acc:MGI:104580]
CD4+ memory T	Kdm6b	1.69753e-08	-0.056917	0.274	0.311	0.000274286	KDM1 lysine (K)-specific demethylase 6B [Source:MGI Symbol;Acc:MGI:2448492]
CD4+ memory T	Pip5k1a	1.71706e-08	-0.0350439	0.238	0.252	0.000277442	phosphatidylinositol-4-phosphate 5-kinase, type 1 alpha [Source:MGI Symbol;Acc:MGI:107929]
CD4+ memory T	Vamp2	1.74125e-08	-0.0461472	0.219	0.237	0.000281352	vesicle-associated membrane protein 2 [Source:MGI Symbol;Acc:MGI:1313277]
CD4+ memory T	Pcmtd2	1.75224e-08	-0.0307724	0.258	0.273	0.000283127	protein-L-isoaspartate (D-aspartate) O-methyltransferase domain containing 2 [Source:MGI Symbol;Acc:MGI:1923927]
CD4+ memory T	Pdia4	1.77844e-08	-0.0330658	0.309	0.316	0.00028736	protein disulfide isomerase associated 4 [Source:MGI Symbol;Acc:MGI:104864]
CD4+ memory T	Acly	1.88549e-08	-0.0392051	0.243	0.255	0.000304657	ATP citrate lyase [Source:MGI Symbol;Acc:MGI:103251]
[truncated: 502 more rows]

## Sheet: CD4+ T_markers
cluster_id	gene	p_val	avg_log2FC	pct.1	pct.2	p_val_adj	description
[truncated: 500 more rows]

## Sheet: CD8+ MemoryT_markers
cluster_id	gene	p_val	avg_log2FC	pct.1	pct.2	p_val_adj	description
[truncated: 861 more rows]

[truncated: 7 more sheets: Dendritic_markers, Macrophages_markers, Monocytes_markers, Neutrophils_markers, NK_markers, NKT_markers, Progenitor_markers]
