# Supplementary material for: Chronic hypoxia disrupts T regulatory cell phenotype contributing to the emergence of exTreg-TH17 cells
Source: Front Physiol. 2024 Jan 29;14:1304732. doi: 10.3389/fphys.2023.1304732 (PMC10859758; doi:10.3389/fphys.2023.1304732)
Supplement: Supplementary file 4 [file Table6.xlsx]

## Sheet: Bosc_Dec2023_NOR6vs2_markers
	p_val	avg_log2FC	pct.1	pct.2	p_val_adj	-log adj pvalue
Srgn	6.43608e-91	-2.31657	0.658	0.952	1.03994e-86	85.983
Tnfsf8	2.37567e-76	-2.96978	0.437	0.83	3.8386e-72	71.4158
Eea1	3.24152e-71	-3.08013	0.324	0.8	5.23765e-67	66.2809
Gpm6b	1.13093e-65	-3.58943	0.162	0.699	1.82735e-61	60.7382
Maf	3.57571e-65	-2.4749	0.464	0.868	5.77763e-61	60.2383
Nfatc1	7.99578e-57	-2.1833	0.491	0.862	1.29196e-52	51.8888
S100a6	7.78613e-51	-3.59436	0.203	0.615	1.25808e-46	45.9003
Tbc1d4	4.04023e-49	-1.90523	0.545	0.862	6.5282e-45	44.1852
Cd82	5.34204e-46	-1.95368	0.428	0.836	8.63168e-42	41.0639
Hif1a	1.66026e-41	-1.92646	0.505	0.818	2.68265e-37	36.5714
Smc4	7.52951e-41	1.38049	0.887	0.671	1.21662e-36	35.9148
Ptpn11	9.18761e-40	-2.30893	0.275	0.691	1.48453e-35	34.8284
Lag3	1.85477e-39	-3.38972	0.108	0.579	2.99694e-35	34.5233
Rilpl2	2.81787e-39	-2.4884	0.248	0.661	4.55311e-35	34.3417
Icos	3.77164e-38	-2.11084	0.369	0.776	6.09422e-34	33.2151
Cd200	6.59516e-38	-2.59564	0.257	0.617	1.06565e-33	32.9724
Ptms	1.90345e-37	-2.22384	0.302	0.687	3.07559e-33	32.5121
Ift80	9.86842e-37	2.45948	0.64	0.19	1.59454e-32	31.7974
Egr1	5.88026e-36	-3.56246	0.14	0.489	9.50133e-32	31.0222
Rps19	4.35992e-34	0.625809	0.995	0.99	7.04476e-30	29.1521
Malt1	4.91253e-32	-2.01297	0.468	0.733	7.93766e-28	27.1003
Resf1	8.54799e-32	1.53438	0.77	0.465	1.38118e-27	26.8597
Ly6a	1.97624e-31	-2.36693	0.252	0.627	3.19321e-27	26.4958
Rpl37a	5.70345e-31	0.50933	1	0.996	9.21564e-27	26.0355
Ahnak	1.081e-29	-1.69875	0.518	0.802	1.74668e-25	24.7578
Zap70	3.39986e-28	-1.534	0.495	0.76	5.49349e-24	23.2602
Ikzf4	4.22848e-28	2.21816	0.599	0.192	6.83238e-24	23.1654
Hspa5	1.15782e-27	-1.34127	0.649	0.834	1.87081e-23	22.728
Selplg	2.92579e-27	1.53996	0.73	0.329	4.72749e-23	22.3254
Rps16	4.02908e-27	0.520423	1	0.996	6.51018e-23	22.1864
Ctsb	5.17559e-27	-1.53121	0.423	0.743	8.36272e-23	22.0777
Cd3e	8.75417e-27	-0.81667	0.919	0.962	1.4145e-22	21.8494
Ndfip1	2.00103e-26	-1.18747	0.694	0.856	3.23326e-22	21.4904
Rpl17	2.57819e-26	0.497438	1	0.988	4.16585e-22	21.3803
Cd4	8.47337e-26	-1.30005	0.572	0.814	1.36913e-21	20.8636
Rpl38	8.90266e-26	0.498872	0.995	0.986	1.43849e-21	20.8421
Rps10	1.0254e-25	0.523859	1	0.984	1.65685e-21	20.7807
Hdac7	2.30208e-25	-1.62347	0.432	0.675	3.7197e-21	20.4295
Rpl18a	5.18183e-25	0.565277	0.986	0.98	8.3728e-21	20.0771
Rpl39	1.41216e-24	0.545183	1	0.986	2.28177e-20	19.6417
Angptl2	1.80249e-24	-5.60762	0.018	0.439	2.91247e-20	19.5357
Rps15a	2.39864e-24	0.558552	0.995	0.98	3.87572e-20	19.4116
Sostdc1	3.7933e-24	-8.1444	0.005	0.335	6.12921e-20	19.2126
S100a11	6.44676e-24	-1.5139	0.428	0.762	1.04167e-19	18.9823
Rpl36	7.97828e-24	0.568658	1	0.96	1.28913e-19	18.8897
Rps24	1.4934e-23	0.439877	1	0.998	2.41304e-19	18.6174
Kdm6b	2.19756e-23	-2.11848	0.243	0.553	3.55081e-19	18.4497
Cd247	2.38759e-23	-1.61668	0.392	0.667	3.85787e-19	18.4137
Egr2	3.22093e-23	-5.33023	0.023	0.405	5.20439e-19	18.2836
Slfn2	3.23158e-23	-1.17312	0.64	0.846	5.22158e-19	18.2822
Cd3g	1.46169e-22	-0.821604	0.914	0.954	2.36181e-18	17.6268
Tnfaip8	1.49277e-22	-1.48543	0.468	0.689	2.41202e-18	17.6176
Il21	2.39751e-22	-6.95564	0.005	0.405	3.87389e-18	17.4119
Pdcd4	3.13409e-22	0.999677	0.829	0.599	5.06406e-18	17.2955
Hsp90ab1	3.89353e-22	-0.815096	0.982	0.986	6.29117e-18	17.2013
Bcl2	6.76761e-22	1.14088	0.838	0.563	1.09351e-17	16.9612
Rps11	7.2177e-22	0.513426	1	0.988	1.16624e-17	16.9332
Sdf4	1.29054e-21	-1.42607	0.586	0.747	2.08525e-17	16.6808
Hsp90aa1	1.40742e-21	-1.14563	0.716	0.904	2.2741e-17	16.6432
St8sia4	3.89361e-21	1.48459	0.698	0.361	6.29129e-17	16.2013
Nfkbia	4.11567e-21	-1.45523	0.563	0.729	6.6501e-17	16.1772
Atp1a1	5.38525e-21	-1.55399	0.356	0.641	8.70149e-17	16.0604
Cd44	5.64469e-21	-1.58532	0.311	0.649	9.12069e-17	16.04
Zfp36l1	1.23749e-20	-1.01438	0.73	0.9	1.99953e-16	15.6991
Dusp2	2.96773e-20	-1.47198	0.374	0.653	4.79526e-16	15.3192
Rnf19a	3.22095e-20	-1.96668	0.167	0.543	5.2044e-16	15.2836
Trim8	4.41382e-20	-1.67848	0.288	0.577	7.13185e-16	15.1468
Rps26	4.78722e-20	0.54096	0.995	0.986	7.73519e-16	15.1115
Tnfrsf4	4.82123e-20	-1.6931	0.405	0.605	7.79015e-16	15.1085
Egr3	5.59172e-20	-5.13124	0.027	0.349	9.0351e-16	15.0441
Rps13	1.41754e-19	0.449983	0.995	0.988	2.29046e-15	14.6401
Hivep3	1.42666e-19	-2.20359	0.239	0.469	2.30519e-15	14.6373
Rpl27a	2.65857e-19	0.43212	1	0.994	4.29572e-15	14.367
Kdm2b	2.69971e-19	-2.05933	0.198	0.505	4.36219e-15	14.3603
Rpl37	3.12338e-19	0.435581	0.995	0.99	5.04676e-15	14.297
Rpl12	3.18718e-19	0.516794	1	0.98	5.14985e-15	14.2882
B3gnt2	3.2901e-19	-1.27769	0.432	0.717	5.31615e-15	14.2744
Mxd4	3.71042e-19	1.18065	0.761	0.487	5.9953e-15	14.2222
Bhlhe40	6.7197e-19	-2.29095	0.176	0.471	1.08577e-14	13.9643
Rpl32	9.84311e-19	0.47631	0.995	0.984	1.59045e-14	13.7985
Rps9	1.18571e-18	0.412655	1	0.994	1.91587e-14	13.7176
Rps20	1.67466e-18	0.485723	1	0.992	2.70591e-14	13.5677
Tle3	1.81209e-18	-1.43418	0.374	0.613	2.92797e-14	13.5334
Trac	1.87753e-18	-0.851633	0.757	0.886	3.03372e-14	13.518
Bcl2a1b	2.28193e-18	-1.8801	0.221	0.529	3.68715e-14	13.4333
AU020206	2.60394e-18	-1.21198	0.613	0.766	4.20744e-14	13.376
Rpl22	4.97389e-18	0.442787	0.995	0.97	8.03681e-14	13.0949
Baz1a	8.37976e-18	-1.45735	0.36	0.621	1.354e-13	12.8684
Rps7	1.88584e-17	0.470027	0.986	0.978	3.04715e-13	12.5161
Id2	1.92699e-17	-2.05625	0.207	0.473	3.11363e-13	12.5067
Eef1a1	2.38993e-17	0.359877	1	0.992	3.86165e-13	12.4132
Rps5	2.60596e-17	0.463601	0.986	0.972	4.2107e-13	12.3756
Pdcd1	4.88416e-17	-2.56191	0.117	0.433	7.89183e-13	12.1028
Zfand5	5.79808e-17	-1.82883	0.198	0.509	9.36854e-13	12.0283
Rps15	6.38651e-17	0.400371	0.991	0.988	1.03193e-12	11.9863
Plekho1	6.51466e-17	-2.96492	0.081	0.443	1.05264e-12	11.9777
Smco4	6.97125e-17	-2.14231	0.158	0.481	1.12641e-12	11.9483
Rps28	9.86892e-17	0.417497	1	0.992	1.59462e-12	11.7973
Rpl26	1.26337e-16	0.433459	0.995	0.97	2.04135e-12	11.6901
Aldoa	1.38061e-16	-1.16372	0.505	0.699	2.2308e-12	11.6515
Rap1a	2.65627e-16	-1.09148	0.473	0.741	4.292e-12	11.3673
Ptpn1	2.85811e-16	-1.0224	0.563	0.766	4.61813e-12	11.3355
Rpl36a	4.68694e-16	0.511368	0.973	0.908	7.57316e-12	11.1207
Orai1	5.59097e-16	-1.69844	0.225	0.521	9.03389e-12	11.0441
Tox	6.12576e-16	-1.16222	0.423	0.711	9.898e-12	11.0045
Rps4x	6.14479e-16	0.430102	0.995	0.984	9.92876e-12	11.0031
Fxyd5	6.36647e-16	-0.802607	0.793	0.906	1.02869e-11	10.9877
Pik3r1	8.0317e-16	1.33149	0.604	0.289	1.29776e-11	10.8868
S100a4	1.07012e-15	-3.02792	0.108	0.351	1.7291e-11	10.7622
Rpl23	1.36073e-15	0.374813	1	0.992	2.19866e-11	10.6578
Pou2f2	1.45757e-15	-0.883083	0.793	0.868	2.35513e-11	10.628
Lbh	1.56619e-15	-0.869689	0.761	0.84	2.53064e-11	10.5968
Hspa8	1.58706e-15	-0.673756	0.964	0.978	2.56437e-11	10.591
Rpl19	1.83452e-15	0.355514	0.995	0.99	2.96422e-11	10.5281
Hook3	1.9754e-15	-1.43657	0.315	0.559	3.19186e-11	10.496
Ier2	2.07632e-15	-1.6417	0.23	0.509	3.35492e-11	10.4743
Twsg1	3.02876e-15	-1.79235	0.189	0.485	4.89386e-11	10.3103
Pfn1	3.11009e-15	-0.581074	0.95	0.964	5.02529e-11	10.2988
Rpl10a	3.2413e-15	0.523021	0.968	0.946	5.2373e-11	10.2809
Rps21	3.42805e-15	0.361874	1	0.994	5.53904e-11	10.2566
Rpl13	4.03799e-15	0.356758	1	1	6.52458e-11	10.1854
2023-09-07	4.32899e-15	-1.02	0.545	0.741	6.99478e-11	10.1552
Vsir	4.43632e-15	-1.37663	0.347	0.573	7.1682e-11	10.1446
Marcksl1	4.53524e-15	-2.83152	0.086	0.403	7.32805e-11	10.135
Lcp2	6.20493e-15	-1.00076	0.626	0.78	1.00259e-10	9.99888
Samhd1	6.87202e-15	0.792685	0.883	0.737	1.11038e-10	9.95453
Gapdh	7.58399e-15	-0.829254	0.761	0.85	1.22542e-10	9.91171
Rpl18	7.84632e-15	0.388788	0.995	0.978	1.26781e-10	9.89695
Junb	8.81921e-15	-1.14483	0.545	0.723	1.42501e-10	9.84618
Ddx21	1.37703e-14	-1.3066	0.392	0.599	2.22501e-10	9.65267
Hnrnpa2b1	1.38388e-14	-0.574287	0.968	0.98	2.23608e-10	9.65051
Rpl30	1.49551e-14	0.372709	0.995	0.982	2.41644e-10	9.61682
Rel	1.96611e-14	-1.58267	0.284	0.505	3.17685e-10	9.498
Arf6	2.67421e-14	-1.55463	0.252	0.499	4.32099e-10	9.36442
Rps18	3.04016e-14	0.405895	0.995	0.976	4.91229e-10	9.30872
Hivep2	3.98884e-14	-1.32722	0.338	0.567	6.44516e-10	9.19077
Fyn	4.45419e-14	-0.83152	0.716	0.852	7.19708e-10	9.14284
Sell	7.06037e-14	2.15725	0.432	0.162	1.14081e-09	8.94279
Odc1	7.24858e-14	-1.92893	0.207	0.441	1.17123e-09	8.93136
Rpl3	1.23179e-13	0.430287	0.986	0.95	1.99032e-09	8.70108
Ldha	2.08539e-13	-1.04158	0.55	0.707	3.36958e-09	8.47242
Rpl6	2.10442e-13	0.387703	0.991	0.962	3.40033e-09	8.46848
Rgs1	2.34745e-13	1.77872	0.523	0.236	3.79301e-09	8.42102
Lcp1	2.57985e-13	-0.742457	0.833	0.878	4.16853e-09	8.38002
Rbpj	2.64932e-13	-1.49865	0.315	0.501	4.28077e-09	8.36848
Prkca	2.87622e-13	-1.16681	0.356	0.627	4.6474e-09	8.33279
Kbtbd11	3.2141e-13	1.10606	0.599	0.375	5.19335e-09	8.28455
Jak2	3.69085e-13	-1.36757	0.329	0.539	5.96367e-09	8.22449
Rpl24	4.27634e-13	0.424012	0.991	0.958	6.90971e-09	8.16054
Fau	5.58801e-13	0.334983	1	0.992	9.02911e-09	8.04436
Rack1	5.99737e-13	0.410128	0.982	0.964	9.69054e-09	8.01365
2410006H16Rik	8.37989e-13	1.01248	0.608	0.417	1.35402e-08	7.86837
H3f3b	9.06005e-13	-0.624029	0.851	0.936	1.46392e-08	7.83448
Mbnl1	9.575e-13	0.507387	0.995	0.958	1.54713e-08	7.81047
Lgals1	1.22281e-12	-1.86769	0.216	0.413	1.97582e-08	7.70425
Tuba1b	1.74074e-12	-1.26588	0.405	0.605	2.81269e-08	7.55088
Rpl13a	1.74742e-12	0.328868	0.995	0.992	2.82348e-08	7.54922
Rplp1	1.75039e-12	0.297786	0.991	0.994	2.82828e-08	7.54848
Tut4	2.92341e-12	0.953629	0.667	0.389	4.72364e-08	7.32572
Bcl11b	3.14415e-12	0.726796	0.874	0.719	5.08031e-08	7.29411
Ptprc	3.26053e-12	-0.478253	0.995	0.988	5.26836e-08	7.27832
Kras	3.26122e-12	-1.50763	0.23	0.481	5.26948e-08	7.27823
Cd83	3.78728e-12	-1.81641	0.234	0.413	6.11949e-08	7.21328
Rps23	4.78032e-12	0.307675	0.995	0.984	7.72404e-08	7.11216
Arpc2	6.55265e-12	-0.622868	0.824	0.898	1.05878e-07	6.9752
Anp32e	7.06105e-12	-1.10205	0.369	0.589	1.14092e-07	6.94274
Calm1	8.00429e-12	-0.688287	0.842	0.87	1.29333e-07	6.88829
Irf4	8.61618e-12	-3.10001	0.081	0.341	1.3922e-07	6.8563
Rps14	9.16621e-12	0.305782	1	0.99	1.48108e-07	6.82942
Igf1r	9.50589e-12	-1.07614	0.482	0.647	1.53596e-07	6.81362
Mmd	1.21345e-11	-1.85142	0.14	0.425	1.96069e-07	6.70759
Malat1	1.21618e-11	-0.347824	1	1	1.9651e-07	6.70661
Hsph1	1.55731e-11	-1.29537	0.302	0.521	2.51631e-07	6.59924
Rps27	1.93712e-11	0.31865	1	0.996	3.12999e-07	6.50446
Rps8	1.96491e-11	0.29692	1	0.992	3.17491e-07	6.49827
Cd28	2.2413e-11	-0.809374	0.644	0.782	3.6215e-07	6.44111
Ms4a6b	2.2537e-11	0.756194	0.856	0.677	3.64153e-07	6.43872
Rps3	2.3903e-11	0.365752	0.982	0.962	3.86225e-07	6.41316
Gna13	2.78359e-11	-1.09349	0.383	0.573	4.49772e-07	6.34701
Btla	3.82604e-11	-1.54954	0.225	0.441	6.18212e-07	6.20886
Nr4a1	3.84672e-11	-4.90566	0.027	0.269	6.21553e-07	6.20652
Itgb8	4.16077e-11	-1.99139	0.144	0.377	6.72297e-07	6.17244
Mif	4.23945e-11	-1.18954	0.428	0.573	6.8501e-07	6.1643
Rpl27	4.63343e-11	0.362484	0.995	0.966	7.48669e-07	6.12571
Jade2	4.68065e-11	-1.33514	0.266	0.495	7.563e-07	6.12131
Ptma	4.71891e-11	-0.665353	0.973	0.952	7.62481e-07	6.11777
Ybx3	5.60365e-11	-1.38791	0.293	0.479	9.05438e-07	6.04314
Ywhae	6.00068e-11	-0.890736	0.523	0.687	9.6959e-07	6.01341
Sla	7.38177e-11	-1.02081	0.432	0.611	1.19275e-06	5.92345
Actg1	7.86586e-11	-0.527528	0.95	0.968	1.27097e-06	5.89587
Hnrnpll	8.04024e-11	-1.27303	0.284	0.505	1.29914e-06	5.88634
Tgfb1	8.16505e-11	-0.994656	0.414	0.609	1.31931e-06	5.87965
Nfkbid	8.28778e-11	-2.74241	0.086	0.349	1.33914e-06	5.87317
A430093F15Rik	9.69747e-11	-1.63093	0.189	0.429	1.56692e-06	5.80495
Raf1	1.05988e-10	-1.27359	0.293	0.497	1.71256e-06	5.76635
Hnrnpk	1.1318e-10	-0.647349	0.779	0.884	1.82876e-06	5.73784
Timp2	1.19162e-10	-1.64269	0.171	0.427	1.92541e-06	5.71548
Stx11	1.24264e-10	-2.70028	0.086	0.361	2.00785e-06	5.69727
Actb	1.31297e-10	-0.328664	1	1	2.12149e-06	5.67336
Itgb1	1.31485e-10	-0.846019	0.613	0.824	2.12454e-06	5.67274
Eif1	1.32468e-10	-0.487058	0.937	0.96	2.14042e-06	5.6695
Ctss	1.33818e-10	0.741718	0.707	0.537	2.16223e-06	5.6651
Aebp2	1.49328e-10	-0.925334	0.446	0.657	2.41284e-06	5.61747
Gbp7	1.55823e-10	1.3954	0.5	0.228	2.51778e-06	5.59898
Rpl34	1.64421e-10	0.319757	0.995	0.978	2.65671e-06	5.57566
Batf	1.75634e-10	-2.02617	0.18	0.371	2.8379e-06	5.547
Mat2a	2.06989e-10	-0.928742	0.541	0.695	3.34453e-06	5.47566
Nudt4	2.09459e-10	-2.18636	0.135	0.367	3.38445e-06	5.47051
Csnk1a1	2.30554e-10	-0.674228	0.73	0.822	3.7253e-06	5.42884
Fkbp1a	2.36844e-10	-0.92627	0.419	0.637	3.82692e-06	5.41715
Ptpn18	2.52909e-10	0.563464	0.896	0.756	4.0865e-06	5.38865
Slamf6	2.83374e-10	-0.809167	0.676	0.784	4.57876e-06	5.33925
Nt5e	2.99626e-10	-0.822587	0.545	0.719	4.84135e-06	5.31503
Cfl1	3.28296e-10	-0.552366	0.865	0.926	5.3046e-06	5.27535
Chst2	3.74592e-10	-2.43942	0.104	0.357	6.05266e-06	5.21805
Rplp2	4.73912e-10	0.251876	1	0.998	7.65748e-06	5.11591
Stat1	4.9942e-10	0.619775	0.86	0.8	8.06963e-06	5.09315
Il2ra	5.07396e-10	1.50952	0.554	0.19	8.1985e-06	5.08627
Gas5	6.5449e-10	0.579482	0.847	0.735	1.05753e-05	4.97571
Gm26740	7.85494e-10	0.985761	0.568	0.367	1.2692e-05	4.89647
Set	8.08348e-10	-0.671498	0.788	0.84	1.30613e-05	4.88401
Grap2	8.6959e-10	1.92747	0.473	0.144	1.40508e-05	4.8523
Cyth4	9.06241e-10	0.960753	0.572	0.357	1.4643e-05	4.83437
Igtp	1.03213e-09	1.29972	0.464	0.257	1.66771e-05	4.77788
Gimap5	1.11713e-09	-0.877814	0.423	0.625	1.80506e-05	4.74351
Rpl5	1.19898e-09	0.316395	0.986	0.98	1.93731e-05	4.7128
Hmgb1	1.29381e-09	-0.582956	0.833	0.88	2.09054e-05	4.67974
1700019D03Rik	1.33827e-09	-2.62903	0.077	0.357	2.16238e-05	4.66507
Elob	1.33937e-09	-0.807272	0.5	0.669	2.16416e-05	4.66471
Ptpn7	1.60716e-09	-0.839339	0.532	0.657	2.59684e-05	4.58555
Arpc1b	1.80702e-09	-0.664142	0.649	0.8	2.91978e-05	4.53465
Bcl2a1d	1.82872e-09	-2.23563	0.117	0.365	2.95484e-05	4.52947
Rasgrp1	1.86512e-09	1.24206	0.505	0.259	3.01367e-05	4.5209
Stx6	1.947e-09	-1.15714	0.266	0.513	3.14597e-05	4.50225
Snrpb	1.95343e-09	-0.908413	0.441	0.615	3.15636e-05	4.50081
Cotl1	1.95435e-09	-0.785887	0.626	0.719	3.15784e-05	4.50061
Setd5	1.96807e-09	-0.85777	0.509	0.667	3.18e-05	4.49757
Pgam1	2.08572e-09	-1.54201	0.207	0.415	3.3701e-05	4.47236
Rpl35a	2.13968e-09	0.259883	0.995	0.994	3.4573e-05	4.46126
Pkm	2.36035e-09	-0.80336	0.527	0.667	3.81385e-05	4.41864
Rps27a	2.64713e-09	0.274953	0.995	0.988	4.27723e-05	4.36884
Plk3	2.6526e-09	-2.81552	0.068	0.351	4.28608e-05	4.36794
Eif5b	2.87672e-09	-0.936873	0.428	0.617	4.6482e-05	4.33271
Ywhah	3.13004e-09	-0.970173	0.369	0.567	5.05752e-05	4.29606
Uba52	3.19572e-09	0.449569	0.919	0.814	5.16364e-05	4.28704
Sub1	3.34908e-09	-0.730075	0.563	0.749	5.41144e-05	4.26669
Ifngr1	3.41896e-09	1.90241	0.41	0.146	5.52435e-05	4.25772
Nrn1	4.06687e-09	-1.63668	0.261	0.371	6.57125e-05	4.18235
Fam169b	4.51296e-09	0.848571	0.626	0.435	7.29204e-05	4.13715
Cd84	4.9958e-09	-0.783479	0.604	0.715	8.07222e-05	4.09301
Rtn3	5.46693e-09	-1.04653	0.347	0.509	8.83347e-05	4.05387
Arid5b	7.61945e-09	-1.09951	0.32	0.511	0.000123115	3.90969
Myl6	7.78631e-09	-0.519997	0.91	0.916	0.000125811	3.90028
Rpl11	7.92754e-09	0.301018	0.986	0.966	0.000128093	3.89247
Itgal	8.10819e-09	-0.564923	0.77	0.886	0.000131012	3.88269
St13	8.31177e-09	-0.781664	0.486	0.655	0.000134302	3.87192
Fam162a	8.9587e-09	-1.5712	0.18	0.401	0.000144755	3.83937
Bcor	9.11365e-09	-1.08206	0.288	0.513	0.000147258	3.83192
Smarca5	9.55139e-09	-0.769183	0.545	0.675	0.000154331	3.81155
Ptges3	9.98402e-09	-0.885773	0.459	0.621	0.000161322	3.79231
Dnaja1	1.01246e-08	-0.591257	0.824	0.878	0.000163593	3.78624
Tagap	1.17571e-08	-2.10588	0.113	0.343	0.000189971	3.72131
Hnrnpab	1.18665e-08	-0.838143	0.455	0.659	0.000191739	3.71729
Tank	1.2907e-08	-0.987898	0.32	0.545	0.000208551	3.68079
Rgs16	1.84568e-08	-4.32795	0.027	0.301	0.000298225	3.52546
Ppia	1.87117e-08	-0.495322	0.932	0.946	0.000302343	3.5195
Traf3ip3	1.95054e-08	0.722078	0.613	0.483	0.000315168	3.50146
Casp4	2.01968e-08	-1.27323	0.216	0.427	0.000326339	3.48633
Podnl1	2.62767e-08	-2.57875	0.077	0.329	0.000424579	3.37204
Lrp10	2.83306e-08	-0.762807	0.536	0.679	0.000457765	3.33936
Hnrnpu	2.94043e-08	-0.520963	0.829	0.89	0.000475115	3.3232
Eef2	2.97159e-08	0.373936	0.95	0.896	0.000480149	3.31862
S100a10	3.01952e-08	-0.714547	0.743	0.812	0.000487894	3.31167
Sfpq	3.07085e-08	-0.559296	0.752	0.868	0.000496187	3.30435
Notch1	3.23502e-08	-0.72581	0.532	0.683	0.000522715	3.28173
Znrf1	3.30857e-08	0.936607	0.536	0.351	0.000534599	3.27197
Nme1	3.38497e-08	-1.06065	0.347	0.505	0.000546944	3.26206
Cacna1d	3.42208e-08	-5.09361	0.009	0.289	0.000552939	3.25732
Atxn1	3.57573e-08	-0.995604	0.338	0.511	0.000577767	3.23825
Msi2	3.66283e-08	-0.696708	0.577	0.701	0.000591839	3.2278
Stk17b	3.89882e-08	-0.528755	0.766	0.852	0.000629971	3.20068
Gimap3	4.00808e-08	0.423135	0.923	0.88	0.000647626	3.18868
Cap1	4.01443e-08	-0.861952	0.401	0.581	0.000648651	3.18799
Calr	4.46798e-08	-0.678441	0.631	0.772	0.000721937	3.1415
Ubl5	4.47389e-08	-0.658799	0.586	0.717	0.000722892	3.14093
H3f3a	4.58481e-08	-0.525584	0.829	0.878	0.000740813	3.13029
Sp100	4.81291e-08	0.567268	0.802	0.661	0.00077767	3.1092
Prdx1	4.92459e-08	-0.851298	0.455	0.627	0.000795715	3.09924
Wdr26	5.21272e-08	-0.741649	0.509	0.659	0.000842272	3.07455
Rps12	5.26428e-08	0.289156	1	0.998	0.000850603	3.07027
Sp110	5.30036e-08	0.833816	0.527	0.379	0.000856433	3.06731
Serbp1	5.32981e-08	-0.495081	0.883	0.92	0.000861191	3.0649
Cltc	5.69097e-08	-0.887858	0.387	0.577	0.000919548	3.03643
Rps29	5.9114e-08	0.22511	1	0.994	0.000955164	3.01992
Uba1	6.11655e-08	-0.908437	0.36	0.553	0.000988312	3.00511
Hnrnpa3	6.32142e-08	-0.504261	0.887	0.904	0.00102141	2.9908
Rpl10	6.45763e-08	0.318202	0.977	0.948	0.00104342	2.98154
Ccnd2	6.48946e-08	-0.610097	0.811	0.862	0.00104857	2.9794
Arhgef1	6.55234e-08	0.529275	0.833	0.754	0.00105873	2.97522
Arpc3	6.58347e-08	-0.828885	0.401	0.611	0.00106376	2.97316
Cox7a2l	6.99229e-08	0.544589	0.788	0.615	0.00112981	2.94699
Rgs10	7.25155e-08	0.834442	0.599	0.339	0.0011717	2.93118
Ybx1	7.27433e-08	-0.578389	0.775	0.828	0.00117539	2.92982
Rpl15	7.65081e-08	0.31409	0.977	0.936	0.00123622	2.9079
Efhd2	7.97688e-08	-1.15729	0.261	0.445	0.0012889	2.88978
Slc22a15	8.59429e-08	-1.68054	0.135	0.371	0.00138867	2.8574
Taf10	8.65869e-08	-0.916601	0.315	0.545	0.00139907	2.85416
Cct3	8.83571e-08	-0.963497	0.351	0.509	0.00142767	2.84537
Sec61a1	8.87832e-08	-1.12814	0.257	0.469	0.00143456	2.84328
Rps3a1	8.88623e-08	0.233313	0.995	0.994	0.00143584	2.84289
Gnaq	9.19348e-08	-1.54047	0.176	0.365	0.00148548	2.82813
Pgk1	9.58318e-08	-1.00878	0.338	0.481	0.00154845	2.8101
Art2b	9.97175e-08	1.37564	0.45	0.192	0.00161124	2.79284
Itm2c	1.03762e-07	-0.699416	0.572	0.701	0.00167658	2.77558
Arf1	1.14821e-07	-0.837373	0.378	0.551	0.00185527	2.73159
Nsd3	1.17766e-07	0.602237	0.761	0.587	0.00190286	2.72059
Phc3	1.22539e-07	0.753443	0.599	0.405	0.00197999	2.70334
Tiam1	1.31139e-07	-0.72751	0.563	0.689	0.00211895	2.67388
Rpl7	1.39696e-07	0.288342	0.986	0.964	0.0022572	2.64643
Ucp2	1.41664e-07	-0.545216	0.779	0.82	0.002289	2.64035
Ywhaz	1.43278e-07	-0.530269	0.752	0.85	0.00231509	2.63543
9930111J21Rik2	1.44287e-07	0.683578	0.698	0.569	0.00233139	2.63238
Ncl	1.50577e-07	-0.708967	0.865	0.862	0.00243302	2.61385
Alcam	1.55916e-07	-1.66379	0.131	0.365	0.0025193	2.59872
Arhgap5	1.61027e-07	-0.876566	0.401	0.553	0.00260187	2.58471
Gng5	1.6784e-07	-0.643813	0.622	0.737	0.00271196	2.56672
Pebp1	1.72521e-07	-0.885069	0.387	0.529	0.0027876	2.55477
Eif5a	1.79982e-07	-0.867467	0.55	0.653	0.00290815	2.53638
Tnfrsf1b	1.80041e-07	-0.931532	0.32	0.507	0.00290911	2.53624
Eif3e	1.85504e-07	0.495503	0.775	0.643	0.00299737	2.52326
Otud7b	1.89264e-07	-1.35877	0.18	0.405	0.00305813	2.51454
Rpl23a	2.12973e-07	0.246902	0.995	0.98	0.00344121	2.46329
Ptger4	2.13694e-07	-1.05283	0.32	0.453	0.00345286	2.46182
Tmsb10	2.14698e-07	0.307536	1	0.972	0.00346909	2.45978
Spn	2.16651e-07	-0.661031	0.604	0.703	0.00350065	2.45585
Csde1	2.28882e-07	-0.648656	0.608	0.705	0.00369828	2.432
Serf2	2.30476e-07	-0.503053	0.856	0.87	0.00372403	2.42899
Prkar1a	2.42028e-07	-0.657143	0.577	0.705	0.00391069	2.40775
Ostc	2.45152e-07	-0.910297	0.333	0.513	0.00396116	2.40218
D8Ertd738e	2.50191e-07	-0.867467	0.338	0.557	0.00404258	2.39334
Map4k2	2.55337e-07	0.824299	0.55	0.371	0.00412574	2.3845
Stip1	2.55556e-07	-1.02086	0.302	0.483	0.00412928	2.38413
Wdr1	2.60377e-07	-0.744642	0.468	0.623	0.00420717	2.37601
Arhgef18	2.61672e-07	1.30019	0.45	0.204	0.0042281	2.37385
Psmd11	2.82483e-07	-1.12387	0.239	0.447	0.00456435	2.34062
Slc41a1	2.85793e-07	-1.64914	0.14	0.361	0.00461784	2.33556
Gm2682	3.11184e-07	1.21684	0.419	0.226	0.00502811	2.2986
Rpl35	3.15559e-07	0.346129	0.968	0.928	0.0050988	2.29253
Zfp36	3.32709e-07	-1.03373	0.297	0.435	0.00537591	2.26955
Chd1	3.7408e-07	-0.896226	0.342	0.513	0.00604438	2.21865
Nfat5	3.77186e-07	-0.753132	0.532	0.647	0.00609458	2.21506
Itgav	3.84466e-07	-1.18566	0.239	0.407	0.00621219	2.20676
Atp6v0c	4.21957e-07	-1.02305	0.275	0.471	0.00681797	2.16634
Tmed5	4.35689e-07	-0.887554	0.32	0.507	0.00703985	2.15244
Hsp90b1	4.35815e-07	-0.580307	0.671	0.784	0.0070419	2.15231
Lfng	4.36687e-07	0.909393	0.518	0.315	0.00705598	2.15144
Ptpn6	4.42415e-07	-0.773955	0.45	0.575	0.00714854	2.14578
Csf1	4.54731e-07	-2.50612	0.086	0.285	0.00734754	2.13386
Tnfsf11	4.86089e-07	-1.53622	0.171	0.365	0.00785423	2.1049
Psme2	5.16987e-07	-0.672822	0.667	0.707	0.00835348	2.07813
Nsmaf	5.1709e-07	-0.987525	0.288	0.467	0.00835514	2.07805
Nucks1	5.24963e-07	-0.720816	0.5	0.611	0.00848236	2.07148
Cyfip1	5.33773e-07	-0.928742	0.315	0.485	0.0086247	2.06426
Tma7	5.37973e-07	-0.543881	0.698	0.804	0.00869256	2.06085
Rps6	5.3967e-07	0.262915	0.982	0.972	0.00871999	2.05948
Ran	5.53321e-07	-0.82618	0.514	0.611	0.00894056	2.04864
Hnrnpul2	5.89534e-07	-0.680859	0.509	0.647	0.00952569	2.0211
Ets1	6.07989e-07	0.42135	0.959	0.912	0.00982388	2.00772
Irf2bp2	6.15045e-07	-0.79719	0.495	0.617	0.0099379	2.00271
Mob1a	6.2059e-07	-0.70909	0.486	0.639	0.0100275	1.99881
Trps1	6.34388e-07	-1.05893	0.27	0.415	0.0102504	1.98926
Nfkb1	7.07315e-07	-0.518413	0.811	0.838	0.0114288	1.942
Uqcr10	8.20351e-07	-0.749609	0.405	0.577	0.0132552	1.87761
Rab10	8.22081e-07	-0.703364	0.477	0.643	0.0132832	1.8767
Casp3	8.22298e-07	-1.2109	0.216	0.389	0.0132867	1.87658
Fip1l1	8.54758e-07	-0.749058	0.455	0.573	0.0138112	1.85977
Chmp4b	8.85233e-07	-0.794367	0.392	0.553	0.0143036	1.84455
Arap2	9.1292e-07	-0.800588	0.459	0.561	0.014751	1.83118
Top1	9.46988e-07	-0.652796	0.568	0.689	0.0153014	1.81527
Itga6	1.0636e-06	1.45357	0.392	0.198	0.0171856	1.76483
Chd3	1.16519e-06	0.463666	0.833	0.756	0.0188272	1.72521
Dbi	1.19477e-06	-1.07031	0.266	0.427	0.019305	1.71433
Cd53	1.25725e-06	-0.520081	0.779	0.81	0.0203147	1.69219
Tpm3	1.30149e-06	-0.492331	0.806	0.862	0.0210295	1.67717
Bzw1	1.3341e-06	-0.791181	0.432	0.587	0.0215564	1.66642
Elk3	1.34651e-06	-1.06285	0.23	0.447	0.021757	1.6624
Rpl9	1.3868e-06	0.228423	0.995	0.978	0.0224079	1.6496
Actr2	1.40172e-06	-0.547291	0.667	0.77	0.022649	1.64495
Atp5e	1.43906e-06	-0.507705	0.815	0.854	0.0232524	1.63353
Vmp1	1.44659e-06	-0.78535	0.36	0.539	0.0233739	1.63127
Sf3b6	1.52346e-06	-0.78693	0.405	0.555	0.0246161	1.60878
Satb1	1.58084e-06	1.54833	0.356	0.162	0.0255433	1.59272
Nedd8	1.68075e-06	-0.753361	0.414	0.557	0.0271576	1.56611
Gdi2	1.6872e-06	-0.611662	0.64	0.707	0.0272617	1.56445
Mcm6	1.72063e-06	-1.46743	0.189	0.357	0.027802	1.55592
Cflar	1.76838e-06	-0.677607	0.514	0.623	0.0285735	1.54404
Igf2r	1.83604e-06	1.29318	0.437	0.198	0.0296667	1.52773
Cd2	1.89153e-06	-0.525919	0.703	0.806	0.0305633	1.5148
Cd9	1.99403e-06	-1.63358	0.149	0.341	0.0322195	1.49188
Selenok	2.09166e-06	-0.783991	0.351	0.521	0.033797	1.47112
Lax1	2.14702e-06	-1.11163	0.221	0.421	0.0346916	1.45978
Nab1	2.19715e-06	-1.06464	0.243	0.429	0.0355016	1.44975
Slc26a2	2.22282e-06	-1.06182	0.266	0.419	0.0359163	1.44471
Anxa2	2.2944e-06	-2.36865	0.081	0.305	0.0370729	1.43094
Arpc4	2.37871e-06	-0.667651	0.5	0.625	0.0384352	1.41527
Hnrnpd	2.46464e-06	-0.680378	0.514	0.639	0.0398237	1.39986
Gnb1	2.5682e-06	-0.691836	0.45	0.607	0.041497	1.38198
Atp5md	2.59402e-06	-0.741817	0.428	0.543	0.0419142	1.37764
Slc5a3	2.67921e-06	-1.38734	0.176	0.365	0.0432907	1.36361
Oaz1	2.81322e-06	-0.42393	0.869	0.916	0.0454561	1.34241
Ablim1	2.87815e-06	0.511844	0.833	0.731	0.0465052	1.3325
Samsn1	3.02097e-06	-0.868995	0.324	0.481	0.0488129	1.31147
