# Supplementary material for: Chronic hypoxia disrupts T regulatory cell phenotype contributing to the emergence of exTreg-TH17 cells
Source: Front Physiol. 2024 Jan 29;14:1304732. doi: 10.3389/fphys.2023.1304732 (PMC10859758; doi:10.3389/fphys.2023.1304732)
Supplement: Supplementary file 5 [file Table4.XLSX]

## Sheet: CD4_markers_cluster0
Category	Term	Count	%	PValue	Genes	Benjamini-Hochberg adj. P value
KEGG_PATHWAY	mmu03010:Ribosome	50	24.2718	1.51e-53	RPL3, RPL32, RPL34, RPLP0, RPL10A, RPL8, RPL9, RPL6, RPS4X, RPS15, RPS16, RPL18A, RPS18, RPL36, RPL35, RPL37, RPS11, RPS10, RPL39, RPS13, RPS12, RPS7, RPL21, RPS5, RPSA, RPL24, RPL26, RPL29, UBA52, RPL28, RPL10, RPL12, RPL11, RPS15A, RPL14, RPS3, RPL13, RPS2, RPL15, RPS27A, RPL17, RPL19, RPL23A, RPS27, RPS29, RPL27A, RPL22L1, FAU, RPS24, RPS23	2.22e-51
GOTERM_MF_DIRECT	GO:0003735~structural constituent of ribosome	50	24.2718	4.89e-47	RPL3, RPL32, RPL34, RPLP0, RPL10A, RPL8, RPL9, RPL6, RPS4X, RPS15, RPS16, RPL18A, RPS18, RPL36, RPL35, RPL37, RPS11, RPS10, RPL39, RPS13, RPS12, RPS7, RPL21, RPS5, RPSA, RPL24, RPL26, RPL29, UBA52, RPL28, RPL10, RPL12, RPL11, RPS15A, RPL14, RPS3, RPL13, RPS2, RPL15, RPS27A, RPL17, RPL19, RPL23A, RPS27, RPS29, RPL27A, RPL22L1, FAU, RPS24, RPS23	1.69e-44
GOTERM_BP_DIRECT	GO:0006412~translation	53	25.7282	2.94e-41	EIF4A2, RPL3, RPL32, RPL34, RPL10A, RPL8, RPL9, RPL6, RPS4X, RBM3, RPS15, RPS16, RPL18A, RPS18, RPL36, RPL35, RPL37, RPS11, RPL39, RPS13, RPS12, RPS7, RPL21, RPS5, RPSA, RPL24, RPL26, RPL29, UBA52, RPL28, RPL10, RPL12, RPL11, RPS15A, RPL14, RPS3, RPL13, RPS2, RPL15, RPS27A, RPL17, RPL19, RPL23A, RPS27, RPS29, RPL27A, EIF3H, RPL22L1, FAU, EIF3A, RPS24, EIF4G2, RPS23	3.45e-38
GOTERM_MF_DIRECT	GO:0044822~poly(A) RNA binding	74	35.9223	9.73e-39	EIF4A2, DDX3X, HSP90AB1, RPL3, RPL32, ZFP207, CELF2, RPLP0, ENO1, RPL10A, RPL8, RPL6, RPS4X, RBM3, RPS15, LGALS1, RPS16, RPL18A, SNRNP70, RPS18, SUMO2, RPL36, RPL35, RPS11, RPS10, RPS13, RPS12, DDX17, HSP90AA1, MBNL1, RPS7, RPL21, RPS5, CIRBP, RPSA, SFPQ, HNRNPH1, RPL24, MATR3, PABPC1, RPL26, ALDOA, PFN1, PPIB, PPIA, RPL28, H2-D1, RPL10, RPL12, RPL11, ZC3HAV1, HSPD1, PURA, RPS15A, TRA2A, RPL14, R…	1.68e-36
GOTERM_MF_DIRECT	GO:0003723~RNA binding	41	19.9029	7.95e-17	EIF4A2, DDX3X, CELF1, RPL12, RPL34, CELF2, RPL11, ENO1, ZC3HAV1, RPL8, RPL10A, RPL9, RBM3, RPS4X, RPS15, PURA, RPS16, SNRNP70, RPS18, TRA2A, RPS3, RPL13, RPS2, RPL37, RPS11, RPL39, DDX17, HSPA8, MBNL1, RPS5, SETD1B, CIRBP, RPL23A, SFPQ, HNRNPH1, MATR3, PABPC1, TARDBP, EIF3A, EIF4G2, TNRC6B	9.14e-15
GOTERM_MF_DIRECT	GO:0019843~rRNA binding	10	4.85437	1.89e-09	RPS4X, RPS18, RPS5, RPL12, RPL11, RPL23A, RPL37, RPL8, RPS11, RPL9	1.63e-07
GOTERM_BP_DIRECT	GO:0002181~cytoplasmic translation	9	4.36893	2.45e-09	RPLP0, RPL36, RPL22L1, RPL15, RPL26, RPL8, RPL29, RPL9, RPL6	1.44e-06
GOTERM_MF_DIRECT	GO:0098641~cadherin binding involved in cell-cell adhesion	17	8.25243	6.1e-08	HSPA8, DDX3X, HSP90AB1, ENO1, ZC3HAV1, RPL6, CNN2, DNAJB1, RPL14, RPL24, TAGLN2, RPS2, RPL15, PFN1, ALDOA, CLIC1, EIF4G2	4.21e-06
GOTERM_BP_DIRECT	GO:0000027~ribosomal large subunit assembly	7	3.39806	2.98e-07	RPL3, RPL10, RPL12, RPL11, RPL24, RPL23A, RPL6	0.000116
GOTERM_MF_DIRECT	GO:0003729~mRNA binding	11	5.33981	3.23e-06	HSP90AA1, CELF1, SNRNP70, RPS5, RPS3, RPL35, RPS2, PABPC1, RPL6, EIF3A, RPS13	0.000186
GOTERM_MF_DIRECT	GO:0031720~haptoglobin binding	4	1.94175	4.89e-06	HBA-A2, HBB-BT, HBA-A1, HBB-BS	0.000241
GOTERM_MF_DIRECT	GO:0070180~large ribosomal subunit rRNA binding	5	2.42718	1.2e-05	RPL12, RPLP0, RPL23A, RPL17, RPL19	0.000518
GOTERM_BP_DIRECT	GO:0000028~ribosomal small subunit assembly	6	2.91262	2.58e-06	RPS15, RPS27, RPS5, RPSA, RPS2, RPS10	0.000754
GOTERM_BP_DIRECT	GO:0098869~cellular oxidant detoxification	4	1.94175	1.25e-05	HBA-A2, HBB-BT, HBA-A1, HBB-BS	0.00293535
GOTERM_MF_DIRECT	GO:0004601~peroxidase activity	5	2.42718	0.000327	GPX4, HBA-A2, HBB-BT, HBA-A1, HBB-BS	0.0125453
GOTERM_BP_DIRECT	GO:0006457~protein folding	9	4.36893	8.07e-05	DNAJA1, DNAJB1, HSPA8, HSP90AA1, HSP90AB1, PPIB, PPIA, PFDN5, HSPD1	0.0157428
GOTERM_MF_DIRECT	GO:0042277~peptide binding	7	3.39806	0.000507	HSPA8, RPLP0, PPIB, PPIA, OGT, CRIP1, H2-D1	0.0174884
GOTERM_MF_DIRECT	GO:0005344~oxygen transporter activity	4	1.94175	0.000622	HBA-A2, HBB-BT, HBA-A1, HBB-BS	0.0195056
GOTERM_BP_DIRECT	GO:0071353~cellular response to interleukin-4	5	2.42718	0.000197	RPL3, HSP90AB1, TCF7, RPLP0, RPS2	0.0301829
GOTERM_BP_DIRECT	GO:0051726~regulation of cell cycle	8	3.8835	0.000226	HSPA8, SFPQ, CCND2, JUND, TARDBP, CLIC1, JUNB, SIPA1	0.0301829
GOTERM_BP_DIRECT	GO:0098609~cell-cell adhesion	10	4.85437	0.000232	CNN2, DNAJB1, RPL14, TAGLN2, RPL15, RPS2, ZC3HAV1, ENO1, ALDOA, EIF4G2	0.0301829
GOTERM_MF_DIRECT	GO:1990932~5.8S rRNA binding	3	1.45631	0.0011307	RPL6, RPS13, RPL19	0.0325075
GOTERM_MF_DIRECT	GO:0051082~unfolded protein binding	6	2.91262	0.00129211	DNAJA1, DNAJB1, HSPA8, HSP90AA1, HSP90AB1, PFDN5	0.0342905
KEGG_PATHWAY	mmu04141:Protein processing in endoplasmic reticulum	11	5.33981	0.000497	DNAJA1, DNAJB1, HSPA8, TRAM1, HSP90AA1, HSPH1, HSP90AB1, SSR4, DAD1, SEC61G, UBE2D3	0.0364964
GOTERM_BP_DIRECT	GO:0051085~chaperone mediated protein folding requiring cofactor	4	1.94175	0.000336	DNAJB1, HSPA8, HSPH1, HSPD1	0.0393548

## Sheet: CD4_markers_cluster1
Category	Term	Count	%	PValue	Genes	Benjamini-Hochberg adj. P value
GOTERM_CC_DIRECT	GO:0005840~ribosome	74	20.4986	2.68e-79	RPL4, RPL5, RPL30, RPL3, RPL32, RPL31, RPL34, RPLP1, RPLP0, RPL10A, RPL8, RPL9, RPL6, RPL7, RPS4X, RPL7A, RPS14, RPS16, RPL18A, RPS19, RPS18, RPL36, RPLP2, RPL38, RPS11, RPS10, RPL39, RPS13, RPS9, RPS7, RPL21, RPS8, RPS5, RPL23, RPS6, RPL22, RPL13A, RPSA, MRPL52, RPL37A, RPL24, RPL27, RPL29, UBA52, RPL28, RPL10, RPL12, RPL11, RPL36A, RPS15A, RPL14, RPS3, RPL13, RPS2, RPL15, RPL18, RPS27A, RPL17, …	9.57e-77
KEGG_PATHWAY	mmu03010:Ribosome	77	21.3296	1.99e-78	RPL4, RPL5, RPL30, RPL3, RPL32, RPL31, RPL34, RPLP1, RPLP0, RPL10A, RPL8, RPL9, RPL6, RPL7, RPS4X, RPL7A, RPS14, RPS16, RPL18A, RPS19, RPL36AL, RPS18, RPL36, RPL35, RPLP2, RPL38, RPL37, RPS11, RPS10, RPL39, RPS13, RPS9, RPS7, RPL21, RPS8, RPS5, RPL23, RPS6, RPL22, RPL13A, RPSA, RPL37A, RPL24, RPL27, RPL26, RPL29, UBA52, RPL28, RPL10, RPL12, RPL11, RPL36A, RPS15A, RPL14, RPS3, RPL13, RPS2, RPL15, …	3.57e-76
GOTERM_MF_DIRECT	GO:0003735~structural constituent of ribosome	78	21.6066	8.56e-72	RPL4, RPL5, RPL30, RPL3, RPL32, RPL31, RPL34, RPLP1, RPLP0, RPL10A, RPL8, RPL9, RPL6, RPL7, RPS4X, RPS14, RPS16, RPL18A, RPS19, RPL36AL, RPS18, RPL36, RPL35, RPLP2, RPL38, RPL37, RPS11, RPS10, RPL39, RPS13, RPS9, RPS7, RPL21, RPS8, RPS5, RPL23, RPS6, RPL22, RPL13A, RPSA, MRPL52, RPL37A, RPL24, RPL27, RPL26, RPL29, UBA52, RPL28, RPL10, RPL12, RPL11, RPL36A, RPS15A, RPL14, RPS3, RPL13, RPS2, RPL15,…	3.66e-69
GOTERM_BP_DIRECT	GO:0006412~translation	86	23.8227	3.28e-67	RPL4, EIF4A2, RPL5, RPL30, RPL3, RPL32, RPL31, RPL34, RPL10A, RPL8, RPL9, RPL6, RPL7, RPS4X, EEF1B2, RBM3, RPL7A, RPS14, RPS16, RPL18A, RPS19, RPL36AL, RPS18, RPL36, RACK1, RPL35, RPL38, RPL37, RPS11, RPL39, RPS13, EIF5A, RPS9, RPS7, RPL21, RPS8, RPS5, RPL23, RPS6, RPL22, RPL13A, RPSA, EEF1A1, MRPL52, LARS2, EEF1D, RPL37A, RPL24, RPL27, RPL26, RPL29, UBA52, RPL28, RPL10, RPL12, RPL11, RPL36A, RPS…	4.15e-64
GOTERM_CC_DIRECT	GO:0030529~intracellular ribonucleoprotein complex	78	21.6066	2.15e-65	RPL4, RPL5, RPL30, RPL3, RPL32, RPL31, RPLP1, RPLP0, YBX1, RPL10A, RPL8, RPL9, RPL6, ACTB, RPL7, RPS4X, RPL7A, RPS14, RPS16, RPL18A, SNRPD2, RPS19, RPS18, RPL36, RPLP2, RPL38, RPS11, RPS10, RPL39, RPS13, RPS9, RPS7, RPL21, RPS8, RPS5, RPL23, RPS6, RPL22, RPL13A, RPSA, MRPL52, HNRNPH1, NCL, RPL37A, RPL24, SNRPE, RPL27, SNRPF, GAPDH, RPL28, RPL12, RPL11, RPL14, RPS3, RPL13, RPS2, RPL15, HNRNPA1, RP…	3.84e-63
GOTERM_CC_DIRECT	GO:0070062~extracellular exosome	173	47.9224	1.4e-58	RPL4, TXN1, RPL5, NDUFA13, RPL30, RPL3, CD82, RPL31, RPL34, H2-K1, ATP5C1, PARK7, ENO1, RPL10A, ACTB, RPL7, TXNDC17, RPS14, RPS16, LGALS1, CAPNS1, RPS19, SNRPD2, RPS18, FTH1, ARHGDIB, CFL1, BSG, RPS11, RPS10, RPS13, RPS9, RPS7, RPS8, RPS5, RPL23, RPL22, SHISA5, HBB-BT, RPSA, MIF, ATP5J2, EEF1A1, MYL6, NCL, SUB1, S100A6, PSME1, CHMP4B, RPL24, PSME2, SNRPE, S100A4, RPL27, RPL26, PPIB, TLN1, PFN1, P…	1.67e-56
GOTERM_CC_DIRECT	GO:0022625~cytosolic large ribosomal subunit	47	13.0194	1.61e-56	RPL4, RPL5, RPL30, RPL3, RPL10, RPL32, RPL31, RPL12, RPL34, RPLP1, RPL11, RPLP0, RPL36A, RPL8, RPL10A, RPL9, RPL6, RPL7, RPL7A, RPL18A, RPL36AL, RPL36, RPL14, RPL13, RPLP2, RPL35, RPL38, RPL37, RPL15, RPL18, RPL17, RPL39, RPL19, RPL21, RPL23, RPL22, RPL35A, RPL13A, RPL27A, RPL37A, RPL24, RPL27, RPL22L1, RPL26, RPL29, RPL28, UBA52	1.44e-54
GOTERM_MF_DIRECT	GO:0044822~poly(A) RNA binding	110	30.4709	9.22e-51	RPL4, EIF4A2, TXN1, RPL5, RPL30, RPL3, RPL32, RPL31, H2-K1, ATP5C1, ENO1, RPL8, RPL10A, RPL6, RPL7, RPS14, RPS16, LGALS1, RPL18A, RPS19, SNRPD2, RPS18, RPL36, RPL35, RPS11, RPS10, RPS13, SRRM2, RPS9, RPS7, RPL21, RPS8, RPS5, RPL23, RPS6, RPL22, CIRBP, RPSA, EEF1A1, NCL, SUB1, RPL24, S100A4, RPL27, RPL26, PPIB, PFN1, PPIA, RPL28, H2-D1, STIP1, PRDX1, UBC, NDUFV3, BTF3, HSPA8, UBE2I, LSM4, EIF1, RP…	1.97e-48
GOTERM_CC_DIRECT	GO:0022627~cytosolic small ribosomal subunit	30	8.31025	2.97e-37	HBA-A1, RPS4X, RPS14, RPS15A, RPS16, RPS19, RPS18, RPS3, RPS2, RPS11, RPS27A, RPS10, RPS13, RPS9, RPS7, RPS8, RPS5, RPS6, RPSA, RPS26, RPS25, RPS28, RPS27, RPS29, RPS3A1, RPS20, FAU, RPS21, RPS24, RPS23	2.12e-35
GOTERM_CC_DIRECT	GO:0005925~focal adhesion	53	14.6814	2.45e-30	RPL4, RPL5, RPL30, RPL3, RPL31, ARPC1B, RPLP0, RPL10A, RPL8, RPL9, RPL6, ACTB, RPL7, RPS4X, RPL7A, RPS14, CCND3, RPS16, RPS19, RPS18, BSG, CFL1, RAC2, RPLP2, RPL38, RPS11, RPS10, RPS13, RPS9, RPS7, RPS8, RPS5, RPL23, RPL22, RPL13A, CYBA, RPL37A, RPL27, TLN1, PFN1, PPIB, PPIA, RPL12, RPS3, RPS2, RPL18, RPL19, HSPA8, NPM1, ARPC2, ARPC3, RPS29, RPS3A1	1.46e-28
GOTERM_CC_DIRECT	GO:0015935~small ribosomal subunit	21	5.81717	5.1e-29	NPM1, RPS9, RPS5, RPS6, RPSA, RPS4X, RPS26, RPS25, RPS28, RPS16, RPS18, RPS29, RACK1, RPS3, RPS20, RPS2, FAU, RPS27A, RPS21, RPS24, RPS23	2.6e-27
KEGG_PATHWAY	mmu00190:Oxidative phosphorylation	39	10.8033	7.21e-26	NDUFB9, NDUFB8, COX7B, NDUFA13, NDUFB7, UQCRB, NDUFB11, NDUFB5, COX4I1, ATP5K, ATP5C1, ATP5J, COX7A2, UQCR10, ATP5H, ATP5G2, ATP5O, COX5B, COX7C, ATP5G1, ATP5L, ATP5B, ATP5E, ATP5D, NDUFV3, ATP6V1F, COX8A, NDUFA7, NDUFA5, NDUFA4, NDUFA3, NDUFA2, NDUFA1, COX6C, ATP5J2, COX6B1, COX7A2L, UQCRQ, ATP6V0E	6.49e-24
KEGG_PATHWAY	mmu05012:Parkinson's disease	37	10.2493	1.61e-22	NDUFB9, NDUFB8, COX7B, NDUFA13, NDUFB7, UQCRB, NDUFB11, NDUFB5, COX4I1, ATP5C1, ATP5J, COX7A2, PARK7, UQCR10, ATP5H, ATP5G2, ATP5O, COX5B, COX7C, ATP5G1, GNAI2, ATP5B, UBB, ATP5E, ATP5D, NDUFV3, COX8A, NDUFA7, NDUFA5, NDUFA4, NDUFA3, NDUFA2, NDUFA1, COX6C, COX6B1, COX7A2L, UQCRQ	9.64e-21
KEGG_PATHWAY	mmu05010:Alzheimer's disease	38	10.5263	8.6e-21	NDUFB9, NDUFB8, COX7B, NDUFA13, NDUFB7, UQCRB, NDUFB11, NDUFB5, COX4I1, ATP5C1, ATP5J, COX7A2, UQCR10, ATP5H, ATP5G2, ATP5O, COX5B, COX7C, ATP5G1, ATP5B, ATP5E, ATP5D, NDUFV3, COX8A, PSENEN, NDUFA7, NDUFA5, NDUFA4, NDUFA3, NDUFA2, NDUFA1, COX6C, COX6B1, COX7A2L, UQCRQ, CALM1, CALM2, GAPDH	3.87e-19
GOTERM_CC_DIRECT	GO:0005743~mitochondrial inner membrane	40	11.0803	1.39e-18	NDUFB9, NDUFB8, COX7B, NDUFA13, NDUFB7, UQCRB, NDUFB11, NDUFB5, COX4I1, ATP5K, ATP5C1, ATP5J, COX7A2, UQCR10, ATP5H, ATP5O, COX5B, COX7C, ATP5G1, ATP5L, ATP5B, ATP5E, ATP5D, RPS3, NDUFV3, COX8A, NDUFA7, GPX4, NDUFA5, NDUFA4, MDH2, NDUFA3, NDUFA2, NDUFA1, COX6C, ATP5J2, COX6B1, SMDT1, COX7A2L, UQCRQ	6.2e-17
KEGG_PATHWAY	mmu05016:Huntington's disease	36	9.9723	2.95e-17	NDUFB9, NDUFB8, COX7B, NDUFA13, NDUFB7, UQCRB, NDUFB11, NDUFB5, COX4I1, CLTA, ATP5C1, ATP5J, COX7A2, UQCR10, ATP5H, ATP5G2, ATP5O, COX5B, COX7C, ATP5G1, ATP5B, ATP5E, ATP5D, POLR2E, NDUFV3, COX8A, NDUFA7, NDUFA5, NDUFA4, NDUFA3, NDUFA2, NDUFA1, COX6C, COX6B1, COX7A2L, UQCRQ	1.06e-15
GOTERM_CC_DIRECT	GO:0031012~extracellular matrix	34	9.41828	2.81e-17	RPL30, RPL12, RPL11, ATP5O, RPL9, RPS14, ATP5B, PODNL1, RPS15A, LGALS1, RPS16, RPS19, RPS18, PRDX1, CFL1, RPS3, RPS11, RPS10, RPS13, HSPA8, HSP90AA1, RPS7, RPS5, RPL23, RPL22, RPL35A, RPSA, RPS25, MYL6, PKM, RPS20, RPL27, GAPDH, S100A9	1.11e-15
GOTERM_CC_DIRECT	GO:0005739~mitochondrion	83	22.9917	4.82e-17	TXN1, COX7B, NDUFA13, COX4I1, RPL34, ATP5C1, PARK7, ETFB, RPL10A, ATP5G2, ATP5G1, COX7C, PYCARD, RPS14, CHCHD2, FTH1, BSG, RACK1, TSPO, CLIC1, COX8A, BNIP3L, GPX4, ATPIF1, NME2, CYBA, NME1, ATP5J2, COX6B1, MRPL52, LARS2, SMDT1, COX7A2L, PKM, SDHAF1, ALDOA, GAPDH, NDUFB9, NDUFB8, NDUFB7, PLGRKT, UQCRB, NDUFB11, NDUFB5, ATP5K, ATP5J, COX7A2, UQCR10, SRI, ATP5H, ATP5O, COX5B, ATP5L, NT5C, ATP5B, PRD…	1.72e-15
GOTERM_CC_DIRECT	GO:0043209~myelin sheath	27	7.47922	8.89e-16	ATP5C1, HBA-A1, ENO1, ATP5H, ATP5O, COX5B, ACTB, STIP1, ATP5B, RAP1A, UBB, PRDX1, UBC, RPS27A, HSPA8, HSP90AA1, MDH2, NME2, HBB-BT, MIF, NME1, EEF1A1, PKM, ALDOA, PPIA, GAPDH, UBA52	2.88e-14
GOTERM_CC_DIRECT	GO:0005753~mitochondrial proton-transporting ATP synthase complex	12	3.3241	1.37e-15	ATP5B, ATP5E, ATP5D, ATPIF1, ATP5K, ATP5J, ATP5C1, ATP5H, ATP5O, ATP5G1, ATP5L, ATP5J2	3.81e-14
GOTERM_CC_DIRECT	GO:0016020~membrane	198	54.8476	1.39e-15	RPL4, RPL5, RPL30, RPL32, RPL31, ATP5C1, ENO1, RPL8, RPL9, RPL6, ACTB, RPL7, RPS14, KRTCAP2, RPS16, RPL18A, CAPNS1, RPS19, RPS18, BSG, RPL36, RPL35, SMCO4, RPS11, SEC62, RPS10, RPS13, WDR83OS, RPL21, RPL23, COX7A2L, MYL6, RPL24, PSME2, RPL27, RPL26, PFN1, TLN1, RPL28, H2-D1, SKAP1, ATP5K, ATP5J, ATP5H, ATP5O, GABARAP, ATP5L, ATP5B, LDHA, ATP5E, CD19, ATP5D, FIS1, NDFIP1, RPS26, RPL27A, RPS20, FXY…	3.81e-14
GOTERM_BP_DIRECT	GO:0002181~cytoplasmic translation	15	4.15512	2.98e-16	RPL31, RPLP1, RPLP0, RPL22, RPL35A, RPL8, RPL9, RPL6, RPL7, RPL36, RPLP2, RPL22L1, RPL26, RPL15, RPL29	1.88e-13
GOTERM_MF_DIRECT	GO:0003723~RNA binding	49	13.5734	1.6e-13	EIF4A2, RPL5, RPL30, RPL34, YBX1, PARK7, ENO1, RPL10A, RPL8, RPL9, RPL7, RPS4X, RBM3, RPL7A, RPS14, RPS16, RPS18, RPL38, RPL37, RPS11, RPL39, EIF5A, RPS9, RPS5, RPL22, CIRBP, HNRNPH1, NCL, SNRPG, SNRPE, SNRPF, RPL12, RPL11, RNASET2B, RNASET2A, RPS3, RPL13, RPS2, HNRNPA1, RPL18, HSPA8, HNRNPA3, NPM1, LSM4, RPS28, SON, EIF3K, HNRNPD, RPS20	2.28e-11
GOTERM_CC_DIRECT	GO:0005747~mitochondrial respiratory chain complex I	14	3.87812	1.18e-12	NDUFB9, NDUFB8, NDUFA13, NDUFA7, NDUFB7, NDUFA5, NDUFB11, NDUFA4, NDUFB5, NDUFA3, NDUFA2, NDUFA1, PARK7, NDUFV3	2.95e-11
GOTERM_CC_DIRECT	GO:0070469~respiratory chain	15	4.15512	1.24e-12	NDUFB9, NDUFB8, NDUFA7, NDUFB7, NDUFA5, UQCRB, NDUFB11, NDUFA4, NDUFB5, NDUFA3, NDUFA2, NDUFA1, UQCR10, UQCRQ, NDUFV3	2.95e-11
GOTERM_BP_DIRECT	GO:0015986~ATP synthesis coupled proton transport	11	3.04709	3.03e-12	ATP5B, ATP5E, ATP5D, ATP5K, ATP5J, ATP5C1, ATP5H, ATP5O, ATP5G2, ATP5G1, ATP5L	1.28e-09
KEGG_PATHWAY	mmu04932:Non-alcoholic fatty liver disease (NAFLD)	25	6.92521	1.06e-10	NDUFB9, NDUFB8, COX7B, NDUFA13, NDUFB7, UQCRB, NDUFB11, NDUFB5, COX4I1, COX7A2, UQCR10, COX5B, COX7C, NDUFV3, COX8A, NDUFA7, NDUFA5, NDUFA4, NDUFA3, NDUFA2, NDUFA1, COX6C, COX6B1, COX7A2L, UQCRQ	3.17e-09
GOTERM_CC_DIRECT	GO:0005730~nucleolus	45	12.4654	1.55e-10	RPL4, RPL5, RPL3, RPL31, RPL12, RPL34, RPL11, RPL8, RPL10A, RPL9, RPL6, RPL7, RBM3, PYCARD, RPS14, RPL7A, RPS19, PRDX1, RPL36, RPS3, RPS11, RPS27A, RPL18, RPS10, RPS13, RPL19, HSPA8, NPM1, RPS9, RPS7, RPL21, RPL23, RPS6, CIRBP, RPL13A, EDF1, RBL2, RPS26, EEF1A1, RPS25, EEF1D, RPS3A1, NCL, SUB1, RPS23	3.47e-09
GOTERM_MF_DIRECT	GO:0046933~proton-transporting ATP synthase activity, rotational mechanism	9	2.49307	3.29e-11	ATP5B, ATP5E, ATP5D, ATP5C1, ATP5H, ATP5O, ATP5G2, ATP5G1, ATP5L	3.52e-09
GOTERM_CC_DIRECT	GO:0005737~cytoplasm	176	48.7535	1.8e-10	RPL4, TXN1, RPL5, NDUFA13, RPL30, RPL3, PARK7, ENO1, RPL8, RPL10A, GIMAP6, SAT1, RPL9, RPL6, ACTB, RPL7, TXNDC17, PYCARD, EEF1B2, RPS14, CCND3, PODNL1, LGALS1, CAPNS1, RPS19, SNRPD2, RPS18, ARHGDIB, CFL1, RPL35, RPS11, RPS10, TMSB10, GABARAPL2, GRCC10, RPS9, RPS7, RPL21, RPS8, RPL23, RPS6, RPL22, CIRBP, CYBA, RPSA, MIF, RBX1, EEF1A1, NCL, S100A6, PSME1, CHMP4B, RPL24, PSME2, SNRPE, SNRPF, TLN1, P…	3.78e-09
GOTERM_CC_DIRECT	GO:0005829~cytosol	71	19.6676	1.94e-10	TXN1, UBXN1, PARK7, GIMAP6, SAT1, ACTB, TXNDC17, PYCARD, LGALS1, SNRPD2, CAPNS1, RPS19, RPS18, TMSB4X, ARHGDIB, CFL1, RAC2, RACK1, BNIP3L, GABARAPL2, HSP90AA1, GPX4, RPSA, NME1, RBX1, EEF1A1, PSMA2, SNRPG, S100A6, CHMP4B, SNRPE, SNRPF, PFN1, UBA52, PPIA, GAPDH, SKAP1, VPS28, ODC1, SRI, OAZ1, GABARAP, FYB, PSMA7, GNAI2, PSMB6, STIP1, PRDX5, LDHA, HSPH1, PSMB5, UBB, PSMB3, PRDX1, UBC, PSMB1, RPS3, …	3.84e-09
GOTERM_CC_DIRECT	GO:0015934~large ribosomal subunit	9	2.49307	3.49e-10	RPL4, RBM3, NPM1, RPL27A, RPL13A, RPL26, RPL8, RPL10A, RPL17	6.55e-09
GOTERM_CC_DIRECT	GO:0000276~mitochondrial proton-transporting ATP synthase complex, coupling factor F(o)	8	2.21607	3.91e-10	ATP5K, ATP5J, ATP5H, ATP5O, ATP5G2, ATP5G1, ATP5L, ATP5J2	6.99e-09
GOTERM_BP_DIRECT	GO:0015992~proton transport	14	3.87812	2.65e-11	ATP5K, ATP5C1, ATP5J, ATP5H, ATP5G2, ATP5O, ATP5G1, ATP5L, ATP5J2, ATP5B, ATP5E, ATP5D, ATP6V1F, ATP6V0E	8.37e-09
GOTERM_BP_DIRECT	GO:0002479~antigen processing and presentation of exogenous peptide antigen via MHC class I, TAP-dependent	11	3.04709	7.11e-11	PSMB6, H2-T23, PSMB5, PSMA2, PSMB3, PSMB1, H2-Q7, H2-K1, PSMB8, H2-D1, PSMA7	1.8e-08
GOTERM_BP_DIRECT	GO:0006754~ATP biosynthetic process	10	2.77008	1.21e-10	ATP5B, PKM, ATP5E, ATP5D, ATP5K, ATP5C1, ATP5O, ALDOA, ATP5L, ATP5J2	2.55e-08
GOTERM_MF_DIRECT	GO:0019843~rRNA binding	12	3.3241	8.5e-10	RPS4X, RPL5, NPM1, RPS9, RPS18, RPS5, RPL12, RPL11, RPL37, RPL8, RPS11, RPL9	6.71e-08
GOTERM_MF_DIRECT	GO:0003729~mRNA binding	18	4.98615	1.05e-09	RPL5, HNRNPA3, HSP90AA1, RPS5, RPS6, RPL13A, PARK7, YBX1, RPL6, RPL7, RPS26, EEF1A1, RPS3A1, RPS3, HNRNPD, RPL35, RPS2, RPS13	6.71e-08
GOTERM_MF_DIRECT	GO:0004129~cytochrome-c oxidase activity	10	2.77008	1.1e-09	COX8A, COX7B, COX7A2L, NDUFA4, COX4I1, COX7A2, COX6C, COX5B, COX7C, COX6B1	6.71e-08
GOTERM_MF_DIRECT	GO:0070180~large ribosomal subunit rRNA binding	8	2.21607	2.06e-09	RPLP1, RPL12, RPL23, RPL37A, RPLP0, RPLP2, RPL17, RPL19	1.03e-07
GOTERM_MF_DIRECT	GO:0098641~cadherin binding involved in cell-cell adhesion	24	6.6482	2.17e-09	HSPA8, PARK7, ENO1, RPL6, PSMB6, RPS26, RPL7A, LDHA, PKM, EEF1D, PRDX1, BSG, RACK1, RPL14, RPL24, CHMP4B, RPS2, PKP3, RPL15, TLN1, PFN1, ALDOA, ARGLU1, CLIC1	1.03e-07
GOTERM_CC_DIRECT	GO:0005622~intracellular	62	17.1745	1.02e-08	RPL5, RPL30, RPL3, RPL32, RPL31, RPLP1, GMFG, RPLP0, RPL8, SAT1, RPL9, RPL6, RPS4X, HINT1, LGALS1, RPS19, RPS18, SEC61G, CFL1, RAC2, RPL36, RPLP2, RPL38, RPS11, RPL39, RPS13, GABARAPL2, HSP90AA1, RPS9, RPS7, RPL21, RPS8, RPL22, SHISA5, RPSA, RPL37A, UBA52, RPL28, ARF5, RPL11, SRI, TSPAN32, MYL12A, RAP1A, RPL14, RPL13, RPL15, RPL18, RPL17, RPL19, HSPA8, RPL35A, SPCS2, RPS28, RPS29, RPS3A1, RPL27A,…	1.74e-07
GOTERM_CC_DIRECT	GO:0005913~cell-cell adherens junction	24	6.6482	1.31e-08	HSPA8, PARK7, ENO1, RPL6, PSMB6, RPS26, RPL7A, LDHA, PKM, EEF1D, PRDX1, BSG, RACK1, RPL14, RPL24, CHMP4B, RPS2, PKP3, RPL15, TLN1, PFN1, ALDOA, ARGLU1, CLIC1	2.13e-07
GOTERM_BP_DIRECT	GO:0046034~ATP metabolic process	11	3.04709	1.71e-09	HSPA8, ATP5B, ATP5D, ATP5K, ATP5J, ATP5C1, ATP5H, ATP5O, ATP5G1, ATP5L, ATP5J2	2.75e-07
GOTERM_BP_DIRECT	GO:0000028~ribosomal small subunit assembly	9	2.49307	1.74e-09	RPS25, RPS14, RPS28, RPS27, RPS19, RPS5, RPSA, RPS2, RPS10	2.75e-07
GOTERM_CC_DIRECT	GO:0045263~proton-transporting ATP synthase complex, coupling factor F(o)	7	1.93906	2.57e-08	ATP5K, ATP5J, ATP5H, ATP5G2, ATP5G1, ATP5L, ATP5J2	4e-07
GOTERM_CC_DIRECT	GO:0005634~nucleus	154	42.6593	1.27e-07	RPL4, TXN1, RPL5, NDUFA13, RPL30, RPL3, PARK7, ENO1, RPL10A, RPL9, RPL6, RPL7, PYCARD, CCND3, CHCHD2, LGALS1, SNRPD2, RPS18, RPL36AL, FTH1, CFL1, RPS10, RPS13, SRRM2, BNIP3L, RPS9, RPS7, RPS8, RPS6, RPL22, SHISA5, CIRBP, CYBA, RPSA, MIF, ATP5J2, RBX1, EEF1A1, MORF4L1, NCL, SUB1, S100A6, CHMP4B, SNRPE, S100A4, RPL27, PKP3, SNRPF, PPIB, PFN1, PPIA, UBA52, S100A9, SKAP1, S100A8, ATP5O, OAZ1, STIP1, …	1.89e-06
GOTERM_CC_DIRECT	GO:0005839~proteasome core complex	7	1.93906	9.57e-07	PSMB6, PSMB5, PSMA2, PSMB3, PSMB1, PSMB8, PSMA7	1.37e-05
GOTERM_CC_DIRECT	GO:0000502~proteasome complex	10	2.77008	2.45e-06	PSMB6, PSMB5, UBXN1, PSMA2, PSMB3, PSMB1, PSME1, PSME2, PSMB8, PSMA7	3.37e-05
GOTERM_MF_DIRECT	GO:0015078~hydrogen ion transmembrane transporter activity	8	2.21607	1.52e-06	ATP5D, ATP5K, ATP5J, ATP5H, ATP5G2, ATP5G1, ATP5L, ATP6V0E	6.49e-05
GOTERM_BP_DIRECT	GO:0042274~ribosomal small subunit biogenesis	7	1.93906	7.43e-07	NPM1, RPS28, RPS16, RPS7, RPS19, RPS6, RPS24	9.39e-05
GOTERM_BP_DIRECT	GO:1902600~hydrogen ion transmembrane transport	7	1.93906	7.43e-07	COX8A, COX7B, UQCRB, UQCR10, ATP5G2, ATP5G1, ATP6V0E	9.39e-05
GOTERM_MF_DIRECT	GO:0004298~threonine-type endopeptidase activity	7	1.93906	2.87e-06	PSMB6, PSMB5, PSMA2, PSMB3, PSMB1, PSMB8, PSMA7	0.000103
GOTERM_MF_DIRECT	GO:0008137~NADH dehydrogenase (ubiquinone) activity	8	2.21607	2.89e-06	NDUFB9, NDUFA13, NDUFB8, NDUFA7, NDUFB7, NDUFA5, NDUFA4, NDUFA2	0.000103
GOTERM_CC_DIRECT	GO:0036464~cytoplasmic ribonucleoprotein granule	7	1.93906	8.25e-06	RPS4X, NCL, RPS6, RPLP0, RPL28, RPL6, ACTB	0.000109
GOTERM_CC_DIRECT	GO:0022626~cytosolic ribosome	6	1.66205	1.64e-05	RPL5, RPL27A, RPL23, RPL11, RPL24, RPL29	0.00021
GOTERM_BP_DIRECT	GO:0042273~ribosomal large subunit biogenesis	7	1.93906	3.42e-06	RPL5, NPM1, RPL11, RPL14, RPL35A, RPL26, RPL7	0.000392
GOTERM_BP_DIRECT	GO:0000027~ribosomal large subunit assembly	7	1.93906	5.67e-06	RPL5, RPL3, RPL10, RPL12, RPL11, RPL24, RPL6	0.000597
GOTERM_CC_DIRECT	GO:0000275~mitochondrial proton-transporting ATP synthase complex, catalytic core F(1)	4	1.10803	5.45e-05	ATP5B, ATP5E, ATP5D, ATP5C1	0.000648
GOTERM_CC_DIRECT	GO:0045261~proton-transporting ATP synthase complex, catalytic core F(1)	4	1.10803	5.45e-05	ATP5B, ATP5E, ATP5D, ATP5C1	0.000648
KEGG_PATHWAY	mmu04260:Cardiac muscle contraction	12	3.3241	2.74e-05	COX8A, COX7B, COX7A2L, UQCRB, UQCRQ, COX4I1, COX7A2, UQCR10, COX6C, COX5B, COX7C, COX6B1	0.000706
GOTERM_BP_DIRECT	GO:0098609~cell-cell adhesion	15	4.15512	9.19e-06	ENO1, PSMB6, RPS26, RPL7A, LDHA, EEF1D, PRDX1, BSG, RPL14, RPS2, PKP3, RPL15, TLN1, ALDOA, ARGLU1	0.000893
GOTERM_CC_DIRECT	GO:0005746~mitochondrial respiratory chain	4	1.10803	0.000107	NDUFA13, COX7B, COX7A2L, COX7A2	0.00123778
GOTERM_MF_DIRECT	GO:0032403~protein complex binding	20	5.54017	3.83e-05	NDUFA4, ARPC1B, MIF, ATP5O, ITGAL, FYB, RBX1, NFKBIA, RAP1A, ARPC2, RPS19, RPS3A1, ATP5D, MALAT1, RPS2, TLN1, PPIB, VPS28, SKAP1, RPS24	0.00126077
GOTERM_CC_DIRECT	GO:0005751~mitochondrial respiratory chain complex IV	5	1.38504	0.000115	COX8A, NDUFA4, COX4I1, COX5B, COX7C	0.00128683
KEGG_PATHWAY	mmu03050:Proteasome	9	2.49307	7.13e-05	PSMB6, PSMB5, PSMA2, PSMB3, PSMB1, PSME1, PSME2, PSMB8, PSMA7	0.00160489
GOTERM_CC_DIRECT	GO:0042612~MHC class I protein complex	5	1.38504	0.000152	H2-T23, H2-Q7, H2-K1, H2-Q4, H2-D1	0.00164049
GOTERM_BP_DIRECT	GO:0006364~rRNA processing	12	3.3241	1.83e-05	RPL5, RPS28, RPS16, RPS7, RPS19, RPL11, RPS6, RPL14, RPL35A, RPL26, RPS24, RPL7	0.00164927
GOTERM_MF_DIRECT	GO:1990932~5.8S rRNA binding	4	1.10803	6e-05	RPS9, RPL6, RPS13, RPL19	0.00183567
GOTERM_MF_DIRECT	GO:0046961~proton-transporting ATPase activity, rotational mechanism	6	1.66205	6.52e-05	ATP5B, ATP5E, ATP5D, ATP5C1, ATP6V1F, ATP6V0E	0.00185951
GOTERM_MF_DIRECT	GO:0030881~beta-2-microglobulin binding	5	1.38504	7.05e-05	H2-T23, H2-Q7, H2-K1, H2-Q4, H2-D1	0.00188692
GOTERM_CC_DIRECT	GO:0005797~Golgi medial cisterna	5	1.38504	0.000196	TMEM59, H2-Q7, H2-K1, H2-Q4, H2-D1	0.00205304
GOTERM_CC_DIRECT	GO:0071013~catalytic step 2 spliceosome	9	2.49307	0.000316	SRRM2, HNRNPA3, SNRPD2, SYF2, HNRNPH1, SNRPG, SNRPE, SNRPF, HNRNPA1	0.00322773
GOTERM_MF_DIRECT	GO:0008097~5S rRNA binding	4	1.10803	0.000204	RPL4, RPL5, RPL3, RPL7	0.00514767
GOTERM_CC_DIRECT	GO:0019013~viral nucleocapsid	5	1.38504	0.00056	HNRNPA3, SNRPD2, HNRNPH1, HNRNPD, HNRNPA1	0.00555498
GOTERM_MF_DIRECT	GO:0004601~peroxidase activity	6	1.66205	0.000234	PRDX5, GPX4, PRDX1, HBB-BT, HBA-A1, TXNDC17	0.00557409
GOTERM_CC_DIRECT	GO:0005687~U4 snRNP	4	1.10803	0.000612	SNRPD2, SNRPG, SNRPE, SNRPF	0.00590058
GOTERM_MF_DIRECT	GO:0042277~peptide binding	9	2.49307	0.000316	HSPA8, H2-Q7, H2-K1, RPLP0, H2-Q4, CLTA, PPIB, PPIA, H2-D1	0.00657662
GOTERM_MF_DIRECT	GO:0070181~small ribosomal subunit rRNA binding	4	1.10803	0.000323	RPS14, CIRBP, RPS3, RPS13	0.00657662
GOTERM_MF_DIRECT	GO:0046977~TAP binding	4	1.10803	0.000323	H2-Q7, H2-K1, H2-Q4, H2-D1	0.00657662
GOTERM_MF_DIRECT	GO:0016887~ATPase activity	13	3.60111	0.000344	EIF4A2, HSPA8, HSP90AA1, ATP5K, ATP5C1, ATP5J, ATP5H, ATP5O, ATP5L, ATP5J2, ATP5B, ATP5E, ATP5D	0.00669285
GOTERM_CC_DIRECT	GO:0005681~spliceosomal complex	10	2.77008	0.000747	SRRM2, HSPA8, HNRNPA3, SNRPD2, SYF2, HNRNPH1, SNRPE, SNRPF, HNRNPA1, LSM4	0.00702245
GOTERM_CC_DIRECT	GO:0031672~A band	5	1.38504	0.000929	RPL4, RPL15, RPL17, RPL6, RPL7	0.00850202
GOTERM_CC_DIRECT	GO:0005844~polysome	6	1.66205	0.00096	RPS4X, RPS25, RPS6, RPS3, RPL17, RPL7	0.00856363
GOTERM_CC_DIRECT	GO:0034709~methylosome	4	1.10803	0.00109187	SNRPD2, SNRPG, SNRPE, SNRPF	0.00950724
GOTERM_CC_DIRECT	GO:0005689~U12-type spliceosomal complex	5	1.38504	0.00125297	SNRPD2, SNRPG, SNRPE, YBX1, SNRPF	0.0106502
GOTERM_MF_DIRECT	GO:0019899~enzyme binding	18	4.98615	0.000802	TXN1, CYB5A, HSPA8, NPM1, UBE2I, JUND, TAF10, NME2, PARK7, OAZ1, NME1, PYCARD, NFKBIA, EIF3I, RACK1, RPS3, RPS2, GAPDH	0.0149156
GOTERM_CC_DIRECT	GO:0033290~eukaryotic 48S preinitiation complex	4	1.10803	0.00217044	EIF3K, EIF3I, EIF3H, EIF3F	0.0172188
GOTERM_CC_DIRECT	GO:0071556~integral component of lumenal side of endoplasmic reticulum membrane	4	1.10803	0.00217044	H2-T23, H2-Q7, H2-K1, H2-D1	0.0172188
GOTERM_CC_DIRECT	GO:0016282~eukaryotic 43S preinitiation complex	4	1.10803	0.00217044	EIF3K, EIF3I, EIF3H, EIF3F	0.0172188
GOTERM_CC_DIRECT	GO:0005852~eukaryotic translation initiation factor 3 complex	4	1.10803	0.00263631	EIF3K, EIF3I, EIF3H, EIF3F	0.0200248
GOTERM_CC_DIRECT	GO:0034719~SMN-Sm protein complex	4	1.10803	0.00263631	SNRPD2, SNRPG, SNRPE, SNRPF	0.0200248
GOTERM_CC_DIRECT	GO:0042105~alpha-beta T cell receptor complex	3	0.831025	0.00304942	CD3G, CD3E, CD3D	0.02268
GOTERM_CC_DIRECT	GO:0070971~endoplasmic reticulum exit site	4	1.10803	0.00438514	H2-Q7, H2-K1, H2-Q4, H2-D1	0.0310342
GOTERM_CC_DIRECT	GO:0005685~U1 snRNP	4	1.10803	0.00438514	SNRPD2, SNRPG, SNRPE, SNRPF	0.0310342
GOTERM_CC_DIRECT	GO:0001740~Barr body	3	0.831025	0.00452038	H3F3B, H2AFZ, H3F3A	0.0310342
GOTERM_CC_DIRECT	GO:0034715~pICln-Sm protein complex	3	0.831025	0.00452038	SNRPD2, SNRPE, SNRPF	0.0310342
GOTERM_MF_DIRECT	GO:0042608~T cell receptor binding	4	1.10803	0.00193223	H2-Q7, H2-K1, H2-Q4, H2-D1	0.034458
GOTERM_CC_DIRECT	GO:0005683~U7 snRNP	3	0.831025	0.00625429	SNRPG, SNRPE, SNRPF	0.042128
GOTERM_BP_DIRECT	GO:0051603~proteolysis involved in cellular protein catabolic process	7	1.93906	0.000558	PSMB6, PSMB5, PSMA2, PSMB3, PSMB1, PSMB8, PSMA7	0.0469858
GOTERM_BP_DIRECT	GO:0006810~transport	53	14.6814	0.000621	TXN1, ATP5C1, ETFB, ATP5G2, ATP5G1, TSPO, SEC61B, SEC62, CLIC1, EIF5A, GABARAPL2, TMED9, CYBA, ATP5J2, SMDT1, CHMP4B, ARF5, ATP6V0E, NDUFB9, NDUFB8, NDUFB7, UQCRB, NDUFB11, NDUFB5, ATP5K, ATP5J, UQCR10, ATP5H, ATP5O, OAZ1, GABARAP, ATP5L, ATP5B, ATP5E, ATP5D, NDUFV3, HNRNPA1, ATP6V1F, BTF3, CYB5A, PRELID1, NDUFA7, NDUFA5, NDUFA4, NDUFA3, NDUFA2, NDUFA1, UQCRQ, NACA, CHMP2A, TOMM7, FXYD5, TOMM6	0.0489853
GOTERM_CC_DIRECT	GO:0005635~nuclear envelope	9	2.49307	0.00746295	BNIP3L, UBE2I, GPX4, S100A6, CHMP2A, RAC2, SHISA5, CHMP4B, CLIC1	0.0493384

## Sheet: CD4_markers_cluster2
Category	Term	Count	%	PValue	Genes	Benjamini-Hochberg adj. P value
GOTERM_CC_DIRECT	GO:0016020~membrane	182	51.7045	1.58e-11	RPL4, RPL5, RPL30, RPL32, NDUFA11, NDUFA12, RPL31, H2-K1, ATP5C1, GIMAP5, PARK7, ENO1, RPL8, RPL10A, RPL9, RPL6, ACTB, RPL7, RPS15, PNN, RPS14, KRTCAP2, RPS17, RPS16, RPL18A, RPS19, RPS18, ARHGDIB, CFL1, RPL36, RPL35, RPS11, RPS10, TNFRSF4, RPS13, RPS12, WDR83OS, RPS9, RPS7, RPL21, RPS8, RPS5, RPL23, RPS6, SHISA5, CYBA, RPSA, ATP5J2, EEF1A1, DPM1, TMEM134, MYL6, XRN2, RPL24, PSME2, ERH, RPL27, PT…	6.49e-88
GOTERM_CC_DIRECT	GO:0005737~cytoplasm	177	50.2841	3.97e-12	RPL4, TXN1, RPL5, NDUFA13, RPL30, RPL3, PARK7, ENO1, RPL8, RPL10A, GIMAP6, RPL9, RPL6, ACTB, RPL7, UBE2L3, TXNDC17, PYCARD, RPS15, EEF1B2, PNN, RPS14, LGALS1, RPS19, SNRPD2, RPS18, ARHGDIB, CFL1, RPL35, RPS11, RPS10, TMSB10, GABARAPL2, RPS9, RPS7, RPL21, RPS8, RPL23, RPS6, RPL22, CIRBP, CYBA, RPSA, MIF, RBX1, EEF1A1, PSME1, RPL24, PSME2, SNRPE, PFN1, PPIA, UBA52, RPL28, ZFPM1, S100A9, VPS28, SKAP…	1.55e-86
GOTERM_CC_DIRECT	GO:0070062~extracellular exosome	168	47.7273	7.58e-57	RPL4, TXN1, RPL5, NDUFA13, RPL30, RPL3, RPL31, RPL34, H2-K1, ATP5C1, PARK7, ENO1, RPL10A, ACTB, RPL7, UBE2L3, TXNDC17, RPS14, RPS17, RPS16, LGALS1, RPS19, SNRPD2, RPS18, FTH1, ARHGDIB, CFL1, RPS11, RPS10, RPS13, RPS9, RPS7, RPS8, RPS5, RPL23, RPL22, SHISA5, HBB-BT, RPSA, MIF, HBB-BS, ATP5J2, EEF1A1, TWSG1, MYL6, SUB1, PSME1, RPL24, PSME2, SNRPE, RPL27, RPL26, PPIB, PFN1, PPIA, RPL28, S100A9, VPS2…	1.44e-76
GOTERM_CC_DIRECT	GO:0005634~nucleus	157	44.6023	1.77e-09	RPL4, TXN1, RPL5, NDUFA13, RPL30, RPL3, PARK7, ENO1, RPL10A, RPL9, RPL6, RPL7, UBE2L3, PYCARD, PNN, LGALS1, SNRPD2, RPS18, RPL36AL, FTH1, CFL1, RPS10, RPS13, RPS9, RPS7, RPS8, RPS6, RPL22, SHISA5, CIRBP, CYBA, RPSA, MIF, ATP5J2, RBX1, EEF1A1, DPM1, MORF4L1, SUB1, XRN2, SNRPE, RPL27, PKP3, PPIB, PFN1, FKBP3, PPIA, UBA52, ZFPM1, S100A9, SKAP1, S100A8, ANP32A, ATP5O, OAZ1, PRDX5, LDHA, HSPH1, UBB, P…	2.59e-68
GOTERM_BP_DIRECT	GO:0006412~translation	95	26.9886	1.07e-79	RPL4, RPL5, RPL30, RPL3, RPL32, MRPS14, RPL31, RPL34, RPL10A, RPL8, RPL9, RPL6, RPL7, MRPL33, RPS4X, EEF1B2, RBM3, RPS15, RPL7A, RPS14, RPS17, RPS16, RPL18A, RPS19, RPL36AL, RPS18, RPL36, RACK1, RPL35, RPL38, RPL37, RPS11, RPL39, RPS13, RPS12, RPS9, RPS7, RPL21, RPS8, RPS5, RPL23, RPS6, RPL22, RPL13A, RPSA, EEF1A1, MRPL52, LARS2, EEF1D, RPL37A, RPL24, RPL27, RPL26, RPL29, UBA52, SLC25A4, RPL28, R…	6.81e-57
KEGG_PATHWAY	mmu03010:Ribosome	83	23.5795	8.63e-89	RPL4, RPL5, RPL30, RPL3, RPL32, MRPS14, RPL31, RPL34, RPLP1, RPLP0, RPL10A, RPL8, RPL9, RPL6, RPL7, MRPL33, RPS4X, RPS15, RPL7A, RPS14, RPS17, RPS16, RPL18A, RPS19, RPL36AL, RPS18, RPL36, RPL35, RPLP2, RPL38, RPL37, RPS11, RPS10, RPL39, RPS13, RPS12, RPS9, RPS7, RPL21, RPS8, RPS5, RPL23, RPS6, RPL22, RPL13A, RPSA, RPL37A, RPL24, RPL27, RPL26, RPL29, UBA52, RPL28, RPL10, RPL12, RPL11, RPL36A, RPS1…	6.73e-55
GOTERM_CC_DIRECT	GO:0030529~intracellular ribonucleoprotein complex	81	23.0114	1.46e-70	RPL4, RPL5, RPL30, RPL3, RPL32, MRPS14, RPL31, RPLP1, RPLP0, RPL10A, RPL8, RPL9, RPL6, ACTB, RPL7, MRPL33, RPS4X, RPS15, RPL7A, RPS14, RPS17, RPS16, RPL18A, SNRPD2, RPS19, RPS18, RPL36, RPLP2, RPL38, RPS11, RPS10, RPL39, RPS13, RPS9, RPS7, RPL21, RPS8, RPS5, RPL23, RPS6, RPL22, RPL13A, RPSA, MRPL52, HNRNPH1, RPL37A, RPL24, SNRPE, RPL27, GAPDH, RPL28, RPL12, RPL11, MRPL54, RPL14, RPS3, RPL13, RPS2…	1.5e-41
GOTERM_CC_DIRECT	GO:0005840~ribosome	80	22.7273	1.83e-90	RPL4, RPL5, RPL30, RPL3, RPL32, MRPS14, RPL31, RPL34, RPLP1, RPLP0, RPL10A, RPL8, RPL9, RPL6, RPL7, MRPL33, RPS4X, RPS15, RPL7A, RPS14, RPS17, RPS16, RPL18A, RPS19, RPS18, RPL36, RPLP2, RPL38, RPS11, RPS10, RPL39, RPS13, RPS9, RPS7, RPL21, RPS8, RPS5, RPL23, RPS6, RPL22, RPL13A, RPSA, MRPL52, RPL37A, RPL24, RPL27, RPL29, UBA52, RPL28, RPL10, RPL12, RPL11, RPL36A, MRPL54, RPS15A, RPL14, RPS3, RPL1…	1.67e-27
GOTERM_CC_DIRECT	GO:0005739~mitochondrion	79	22.4432	1.4e-15	TXN1, COX7B, NDUFA13, NDUFA11, MRPS14, NDUFA12, COX4I1, RPL34, ATP5C1, GIMAP5, PARK7, ETFB, RPL10A, ATP5G2, ATP5G1, COX7C, MRPL33, PYCARD, RPS14, FTH1, RACK1, TSPO, CLIC1, COX8A, GPX4, NME2, CYBA, ATP5J2, COX6B1, MRPL52, LARS2, PKM, SDHAF1, ALDOA, SLC25A4, GAPDH, NDUFB9, NDUFB7, UQCRB, NDUFB11, ATP5K, NOL7, ATP5J, COX7A2, UQCR10, SRI, ATP5H, ATP5O, COX5B, COX5A, MRPL54, ATP5L, NT5C, PRDX5, LDHA, …	2.86e-27
GOTERM_CC_DIRECT	GO:0005829~cytosol	74	21.0227	2.32e-12	TXN1, IGHM, UBXN1, PARK7, GIMAP6, ACTB, TXNDC17, PYCARD, LGALS1, SNRPD2, RPS19, RPS18, TMSB4X, ARHGDIB, CFL1, RAC2, RACK1, GABARAPL2, HSP90AA1, GPX4, RPSA, RBX1, EEF1A1, PSMA3, PSMA4, PSMA2, SNRPG, SNRPE, PFN1, UBA52, PPIA, GAPDH, SKAP1, VPS28, ANP32A, SRI, CORO1A, OAZ1, GABARAP, PSMA7, PSMB10, GNAI2, DNAJB1, PRDX5, LDHA, HSPH1, PSMB5, MAT2A, UBB, PSMB2, PSMB3, PDCD10, PRDX1, PSMB1, RPS3, RPS27A,…	1.09e-21
GOTERM_CC_DIRECT	GO:0005622~intracellular	61	17.3295	8.41e-09	RPL5, RPL30, RPL3, RPL32, MRPS14, RPL31, RPLP1, RPLP0, RPL8, RPL9, RPL6, MRPL33, RPS4X, HINT1, RPS17, LGALS1, RPS19, RPS18, SEC61G, CFL1, RAC2, RPL36, RPLP2, RPL38, RPS11, RPL39, RPS13, GABARAPL2, HSP90AA1, RPS9, RPS7, RPL21, RPS8, RPL22, SHISA5, RPSA, RPL37A, UBA52, RPL28, RPL11, SRI, RPL14, RPL13, RPL15, RPL18, RPL17, RPL19, HSPA8, RPL35A, MRPL23, SPCS2, RPS28, RPS29, RPS3A1, RPL27A, BAX, RPL22…	9.64e-21
GOTERM_CC_DIRECT	GO:0005925~focal adhesion	51	14.4886	5.64e-29	RPL4, RPL5, RPL30, RPL3, RPL31, ARPC1B, RPLP0, RPL10A, RPL8, RPL9, RPL6, ACTB, RPL7, RPS4X, RPS15, RPL7A, RPS14, RPS17, RPS16, RPS19, RPS18, CFL1, RAC2, RPLP2, RPL38, RPS11, RPS10, RPS13, RPS9, RPS7, RPS8, RPS5, RPL23, RPL22, RPL13A, CYBA, RPL37A, RPL27, PFN1, PPIB, ATP6V0C, PPIA, RPL12, RPS3, RPS2, RPL18, RPL19, HSPA8, ARPC3, RPS29, RPS3A1	6.46e-17
GOTERM_CC_DIRECT	GO:0022625~cytosolic large ribosomal subunit	48	13.6364	5.76e-59	RPL4, RPL5, RPL30, RPL3, RPL10, RPL32, RPL31, RPL12, RPL34, RPLP1, RPL11, RPLP0, RPL36A, RPL8, RPL10A, RPL9, RPL6, RPL7, RPL7A, RPL18A, RPL36AL, RPL36, RPL14, RPL13, RPLP2, RPL35, RPL38, RPL37, RPL15, RPL18, RPL17, RPL39, RPS12, RPL19, RPL21, RPL23, RPL22, RPL35A, RPL13A, RPL27A, RPL37A, RPL24, RPL27, RPL22L1, RPL26, RPL29, RPL28, UBA52	2.69e-16
GOTERM_BP_DIRECT	GO:0006810~transport	47	13.3523	0.0103426	TXN1, NDUFB9, NDUFB7, UQCRB, NDUFA11, NDUFB11, NDUFA12, SRSF1, ATP5K, ATP5C1, ATP5J, UQCR10, ETFB, ATP5H, ATP5G2, ATP5O, OAZ1, ATP5G1, SLC5A3, GABARAP, ATP5L, ATP5E, ATP5D, TSPO, SEC61B, NDUFV3, NDUFV2, HNRNPA1, CLIC1, ATP6V1F, BTF3, NDUFA8, GABARAPL2, NDUFA7, TMED9, PRELID1, NDUFA4, NDUFA3, NDUFA2, CYBA, ATOX1, ATP5J2, NACA, CHMP2A, TOMM7, ATP6V0C, SLC25A4	1.06e-15
GOTERM_CC_DIRECT	GO:0005654~nucleoplasm	46	13.0682	0.0247851	NDUFA13, RPL3, RPL31, CELF1, RPL11, SRSF1, SRI, ATP5H, GNAI2, RBM3, RPS15, PNN, TAF1D, HSPH1, PSMB5, PSMB2, UBB, PSMB3, RPS2, NDUFV3, HNRNPA1, RPS27A, HNRNPA3, HSP90AA1, PRELID1, UBE2I, H3F3B, H3F3A, CIRBP, MIF, LSM4, NFKB1, SOD1, MORF4L1, COPS6, SON, EIF6, HNRNPH1, HNRNPD, POLR1D, TAB2, DNAJC8, TARDBP, PTMA, UBA52, TPT1	6.23e-15
GOTERM_CC_DIRECT	GO:0005730~nucleolus	47	13.3523	4.6e-12	RPL4, RPL5, RPL3, RPL31, RPL12, RPL34, RPL11, NOL7, RPL8, RPL10A, RPL9, RPL6, RPL7, RBM3, PYCARD, RPS14, DNAJB1, RPL7A, RPS19, PRDX1, RPL36, RPS3, RPS11, RPS27A, RPL18, RPS10, RPS13, RPL19, HSPA8, RPS9, RPS7, RPL21, RPL23, RPS6, CIRBP, RPL13A, EDF1, MRPL23, RPS26, EEF1A1, RPS25, EIF6, EEF1D, RPS3A1, SUB1, XRN2, RPS23	1.89e-14
KEGG_PATHWAY	mmu05012:Parkinson's disease	37	10.5114	1.61e-22	NDUFB9, COX7B, NDUFA13, NDUFB7, UQCRB, NDUFA11, NDUFB11, NDUFA12, COX4I1, ATP5C1, ATP5J, COX7A2, PARK7, UQCR10, ATP5H, ATP5G2, ATP5O, COX5B, COX7C, ATP5G1, COX5A, GNAI2, UBE2L3, UBB, ATP5E, ATP5D, NDUFV3, NDUFV2, COX8A, NDUFA8, NDUFA7, NDUFA4, NDUFA3, NDUFA2, COX6C, COX6B1, SLC25A4	4.97e-14
KEGG_PATHWAY	mmu00190:Oxidative phosphorylation	37	10.5114	1.21e-23	NDUFB9, COX7B, NDUFA13, NDUFB7, UQCRB, NDUFA11, NDUFB11, NDUFA12, COX4I1, ATP5K, ATP5C1, ATP5J, COX7A2, UQCR10, ATP5H, ATP5G2, ATP5O, COX5B, COX7C, ATP5G1, COX5A, ATP5L, ATP5E, ATP5D, NDUFV3, NDUFV2, ATP6V1F, COX8A, NDUFA8, NDUFA7, NDUFA4, NDUFA3, NDUFA2, COX6C, ATP5J2, COX6B1, ATP6V0C	1.12e-13
GOTERM_CC_DIRECT	GO:0005743~mitochondrial inner membrane	37	10.5114	1.58e-16	NDUFB9, COX7B, NDUFA13, NDUFB7, UQCRB, NDUFA11, NDUFB11, NDUFA12, COX4I1, ATP5K, ATP5C1, ATP5J, COX7A2, UQCR10, ATP5H, ATP5O, COX5B, COX7C, ATP5G1, COX5A, ATP5L, ATP5E, ATP5D, RPS3, NDUFV3, NDUFV2, COX8A, NDUFA8, NDUFA7, GPX4, NDUFA4, NDUFA3, NDUFA2, COX6C, ATP5J2, COX6B1, SLC25A4	1.2e-12
KEGG_PATHWAY	mmu05016:Huntington's disease	36	10.2273	2.95e-17	NDUFB9, COX7B, NDUFA13, NDUFB7, UQCRB, NDUFA11, NDUFB11, NDUFA12, COX4I1, CLTA, ATP5C1, ATP5J, COX7A2, UQCR10, ATP5H, ATP5G2, ATP5O, COX5B, COX7C, ATP5G1, COX5A, ATP5E, ATP5D, NDUFV3, NDUFV2, COX8A, NDUFA8, NDUFA7, NDUFA4, NDUFA3, NDUFA2, COX6C, SOD1, COX6B1, BAX, SLC25A4	9.82e-12
GOTERM_CC_DIRECT	GO:0031012~extracellular matrix	35	9.94318	1.46e-18	RPL30, RPL12, RPL11, ATP5O, RPL9, RPS14, RPS17, RPS15A, LGALS1, RPS16, RPS19, RPS18, PRDX1, CFL1, RPS3, RPS11, RPS10, RPS13, HSPA8, HSP90AA1, RPS7, RPS5, RPL23, RPL22, RPL35A, RPSA, EEF2, SOD1, RPS25, MYL6, PKM, RPS20, RPL27, GAPDH, S100A9	2.23e-11
GOTERM_CC_DIRECT	GO:0022627~cytosolic small ribosomal subunit	33	9.375	2.12e-43	HBA-A2, RPS4X, RPS15, RPS14, RPS17, RPS15A, RPS16, RPS19, RPS18, RPS3, RPS2, RPS11, RPS27A, RPS10, RPS13, RPS12, RPS9, RPS7, RPS8, RPS5, RPS6, RPSA, RPS26, RPS25, RPS28, RPS27, RPS29, RPS3A1, RPS20, FAU, RPS21, RPS24, RPS23	5.88e-11
KEGG_PATHWAY	mmu04932:Non-alcoholic fatty liver disease (NAFLD)	26	7.38636	1.68e-11	NDUFB9, COX7B, NDUFA13, NDUFB7, UQCRB, NDUFA11, NDUFB11, NDUFA12, COX4I1, COX7A2, UQCR10, COX5B, COX7C, COX5A, NDUFV3, NDUFV2, COX8A, NDUFA8, NDUFA7, NDUFA4, NDUFA3, NDUFA2, COX6C, NFKB1, COX6B1, BAX	9.39e-11
GOTERM_CC_DIRECT	GO:0043209~myelin sheath	25	7.10227	3.72e-14	ATP5C1, ENO1, ATP5H, ATP5O, COX5B, COX5A, ACTB, UBB, PRDX1, NDUFV2, RPS27A, HSPA8, HSP90AA1, NME2, HBB-BT, HBB-BS, MIF, SOD1, EEF1A1, PKM, ALDOA, PPIA, SLC25A4, GAPDH, UBA52	1.02e-10
GOTERM_BP_DIRECT	GO:0055114~oxidation-reduction process	23	6.53409	0.00515354	TXN1, NDUFB9, NDUFA8, NDUFA7, NDUFB7, GPX4, UQCRB, NDUFA11, NDUFB11, NDUFA4, NDUFA12, NDUFA3, NDUFA2, CYBA, UQCR10, ETFB, SOD1, PRDX5, LDHA, PRDX1, FTH1, NDUFV3, NDUFV2	1.1e-10
KEGG_PATHWAY	mmu05010:Alzheimer's disease	35	9.94318	5.98e-18	NDUFB9, COX7B, NDUFA13, NDUFB7, UQCRB, NDUFA11, NDUFB11, NDUFA12, COX4I1, ATP5C1, ATP5J, COX7A2, UQCR10, ATP5H, ATP5G2, ATP5O, COX5B, COX7C, ATP5G1, COX5A, ATP5E, ATP5D, NDUFV3, NDUFV2, COX8A, PSENEN, NDUFA8, NDUFA7, NDUFA4, NDUFA3, NDUFA2, COX6C, COX6B1, CALM1, GAPDH	2.87e-10
GOTERM_CC_DIRECT	GO:0015935~small ribosomal subunit	21	5.96591	2.82e-29	RPS9, RPS5, RPS6, RPSA, RPS4X, RPS26, RPS15, RPS25, RPS28, RPS16, RPS18, RPS29, RACK1, RPS3, RPS20, RPS2, FAU, RPS27A, RPS21, RPS24, RPS23	2.95e-10
GOTERM_CC_DIRECT	GO:0005913~cell-cell adherens junction	21	5.96591	6.96e-07	HSPA8, PARK7, ENO1, EEF2, RPL6, RPS26, RPL7A, DNAJB1, LDHA, PKM, EEF1D, PRDX1, RACK1, RPL14, RPL24, RPS2, PKP3, RPL15, PFN1, ALDOA, CLIC1	2.95e-10
GOTERM_BP_DIRECT	GO:0006915~apoptotic process	18	5.11364	0.0272822	SRGN, PRELID1, TAF10, TNFRSF18, SHISA5, GABARAP, NFKB1, PYCARD, HINT1, LGALS1, PDCD10, DAD1, RACK1, RPS3, BAX, GAPDH, S100A9, S100A8	5.03e-10
GOTERM_BP_DIRECT	GO:0002181~cytoplasmic translation	15	4.26136	2.51e-16	RPL31, RPLP1, RPLP0, RPL22, RPL35A, RPL8, RPL9, RPL6, RPL7, RPL36, RPLP2, RPL22L1, RPL26, RPL15, RPL29	5.4e-09
GOTERM_CC_DIRECT	GO:0070469~respiratory chain	14	3.97727	1.54e-11	NDUFB9, NDUFA8, NDUFA7, NDUFB7, UQCRB, NDUFA11, NDUFB11, NDUFA4, NDUFA12, NDUFA3, NDUFA2, UQCR10, NDUFV3, NDUFV2	2.86e-08
GOTERM_BP_DIRECT	GO:0002479~antigen processing and presentation of exogenous peptide antigen via MHC class I, TAP-dependent	15	4.26136	2.81e-17	H2-T23, H2-Q7, H2-K1, PSMB10, PSMA7, PSMB8, PSMB9, PSMA3, PSMB5, PSMA4, PSMB2, PSMB3, PSMA2, PSMB1, H2-D1	2.92e-08
GOTERM_CC_DIRECT	GO:0005747~mitochondrial respiratory chain complex I	14	3.97727	8.15e-13	NDUFB9, NDUFA8, NDUFA13, NDUFA7, NDUFB7, NDUFA11, NDUFB11, NDUFA4, NDUFA12, NDUFA3, NDUFA2, PARK7, NDUFV3, NDUFV2	8.25e-08
GOTERM_BP_DIRECT	GO:0015992~proton transport	13	3.69318	3.68e-10	ATP5K, ATP5C1, ATP5J, ATP5H, ATP5G2, ATP5O, ATP5G1, ATP5L, ATP5J2, ATP5E, ATP5D, ATP6V0C, ATP6V1F	1.3e-07
GOTERM_BP_DIRECT	GO:0006397~mRNA processing	13	3.69318	0.0134266	HSPA8, HNRNPA3, CELF1, SRSF1, LSM4, PNN, SON, SNRPD2, HNRNPH1, XRN2, SNRPE, HNRNPA1, TARDBP	1.74e-07
KEGG_PATHWAY	mmu03050:Proteasome	13	3.69318	9.02e-09	PSMB10, PSMA7, PSMB8, PSMB9, PSMA3, PSMB5, PSMA4, PSMB2, PSMB3, PSMA2, PSMB1, PSME1, PSME2	2.32e-07
GOTERM_BP_DIRECT	GO:0002376~immune system process	13	3.69318	0.0431828	H2-T23, H2-Q7, SH2D1A, H2-K1, MIF, CD3E, PSMB8, PSMB9, PYCARD, S100A9, SKAP1, S100A8, H2-D1	3.08e-07
GOTERM_CC_DIRECT	GO:0000502~proteasome complex	14	3.97727	8.82e-11	UBXN1, PSMB10, PSMA7, PSMB8, PSMB9, PSMA3, PSMB5, PSMA4, PSMB2, PSMB3, PSMA2, PSMB1, PSME1, PSME2	7.09e-07
GOTERM_BP_DIRECT	GO:0006364~rRNA processing	14	3.97727	4.14e-07	RPL5, RPS7, RPS6, RPL11, RPL35A, RPL7, RPS15, RPS17, RPS28, RPS16, RPS19, RPL14, RPL26, RPS24	7.44e-07
GOTERM_BP_DIRECT	GO:0051603~proteolysis involved in cellular protein catabolic process	12	3.40909	4.42e-09	PSMA3, PSMB5, PSMA4, PSMB2, PSMA2, PSMB3, PSMB1, CTSS, PSMB8, PSMB10, PSMA7, PSMB9	3.74e-06
GOTERM_BP_DIRECT	GO:0008380~RNA splicing	12	3.40909	0.0041764	PNN, HSPA8, HNRNPA3, SON, SNRPD2, HNRNPH1, CELF1, SRSF1, SNRPE, HNRNPA1, TARDBP, LSM4	9.51e-06
GOTERM_CC_DIRECT	GO:0005839~proteasome core complex	11	3.125	3.32e-13	PSMA3, PSMB5, PSMA4, PSMB2, PSMA2, PSMB3, PSMB1, PSMB8, PSMB10, PSMA7, PSMB9	4.79e-05
GOTERM_BP_DIRECT	GO:0000028~ribosomal small subunit assembly	11	3.125	8.53e-13	RPS15, RPS25, RPS14, RPS17, RPS28, RPS27, RPS19, RPS5, RPSA, RPS2, RPS10	4.79e-05
KEGG_PATHWAY	mmu04260:Cardiac muscle contraction	11	3.125	0.000145	COX8A, COX7B, UQCRB, COX4I1, COX7A2, UQCR10, COX6C, COX5B, COX7C, COX5A, COX6B1	4.79e-05
GOTERM_BP_DIRECT	GO:0098609~cell-cell adhesion	12	3.40909	0.000609	RPS26, DNAJB1, RPL7A, LDHA, EEF1D, PRDX1, RPL14, RPL15, RPS2, PKP3, ENO1, ALDOA	5.06e-05
GOTERM_BP_DIRECT	GO:0015986~ATP synthesis coupled proton transport	10	2.84091	1.09e-10	ATP5E, ATP5D, ATP5K, ATP5J, ATP5C1, ATP5H, ATP5O, ATP5G2, ATP5G1, ATP5L	6.63e-05
GOTERM_BP_DIRECT	GO:0046034~ATP metabolic process	10	2.84091	2.78e-08	HSPA8, ATP5D, ATP5K, ATP5J, ATP5C1, ATP5H, ATP5O, ATP5G1, ATP5L, ATP5J2	6.67e-05
GOTERM_CC_DIRECT	GO:0072562~blood microparticle	10	2.84091	0.000517	IGHM, HSPA8, IGKC, HBA-A2, HBB-BT, HBB-BS, PFN1, CLIC1, ACTB, JCHAIN	0.000159
KEGG_PATHWAY	mmu04145:Phagosome	12	3.40909	0.019952	H2-T23, SEC61G, H2-Q7, H2-K1, CYBA, SEC61B, ATP6V0C, CORO1A, CTSS, H2-D1, ACTB, ATP6V1F	0.000357
KEGG_PATHWAY	mmu04141:Protein processing in endoplasmic reticulum	11	3.125	0.0408936	DNAJA1, DNAJB1, HSPA8, HSP90AA1, HSPH1, SSR4, DAD1, SEC61G, BAX, SEC61B, RBX1	0.000427
GOTERM_CC_DIRECT	GO:0005753~mitochondrial proton-transporting ATP synthase complex	10	2.84091	5.28e-12	ATP5E, ATP5D, ATP5K, ATP5J, ATP5C1, ATP5H, ATP5O, ATP5G1, ATP5L, ATP5J2	0.000507
GOTERM_BP_DIRECT	GO:0006457~protein folding	9	2.55682	0.00212935	TXN1, DNAJA1, DNAJB1, HSPA8, HSP90AA1, PPIB, PPIA, PFDN5, FKBP3	0.000978
GOTERM_CC_DIRECT	GO:0005681~spliceosomal complex	9	2.55682	0.0025533	PNN, HSPA8, HNRNPA3, SNRPD2, HNRNPH1, SRSF1, SNRPE, HNRNPA1, LSM4	0.00111066
GOTERM_BP_DIRECT	GO:0006979~response to oxidative stress	10	2.84091	0.000649	PRDX5, PSMB5, GPX4, NDUFA12, PRDX1, RPS3, PARK7, NFKB1, ATOX1, SOD1	0.00149652
GOTERM_BP_DIRECT	GO:0006754~ATP biosynthetic process	9	2.55682	3.69e-09	PKM, ATP5E, ATP5D, ATP5K, ATP5C1, ATP5O, ALDOA, ATP5L, ATP5J2	0.00370786
GOTERM_BP_DIRECT	GO:0008283~cell proliferation	10	2.84091	0.0176762	MORF4L1, H3F3B, PRDX1, H3F3A, BAX, MIF, PARK7, RPL29, UBE2L3, GNAI2	0.00370786
GOTERM_CC_DIRECT	GO:0015934~large ribosomal subunit	8	2.27273	1.17e-08	RPL4, RBM3, RPL27A, RPL13A, RPL26, RPL8, RPL10A, RPL17	0.00392948
GOTERM_BP_DIRECT	GO:0042274~ribosomal small subunit biogenesis	8	2.27273	2.28e-08	RPS15, RPS17, RPS28, RPS16, RPS7, RPS19, RPS6, RPS24	0.00481904
GOTERM_BP_DIRECT	GO:0006413~translational initiation	8	2.27273	4.69e-05	EIF3M, EIF6, EIF3K, EIF3I, EIF3H, EIF3F, EIF3C, EIF1	0.00483277
GOTERM_BP_DIRECT	GO:0000027~ribosomal large subunit assembly	7	1.98864	5.28e-06	RPL5, RPL3, RPL10, RPL12, RPL11, RPL24, RPL6	0.0075897
GOTERM_CC_DIRECT	GO:0005844~polysome	7	1.98864	9.09e-05	RPS4X, RPS25, RPS6, RPS3, EEF2, RPL17, RPL7	0.00891171
KEGG_PATHWAY	mmu04612:Antigen processing and presentation	9	2.55682	0.00430511	H2-T23, HSPA8, HSP90AA1, H2-Q7, H2-K1, PSME1, PSME2, CTSS, H2-D1	0.00923732
GOTERM_BP_DIRECT	GO:0045727~positive regulation of translation	7	1.98864	0.000523	RBM3, RPS4X, EIF6, RPS3A1, HNRNPD, CIRBP, EEF2	0.0120314
GOTERM_BP_DIRECT	GO:0006417~regulation of translation	7	1.98864	0.0215534	RBM3, RPLP1, RACK1, RPS3, RPL13A, RPL38, S100A9	0.0168905
GOTERM_CC_DIRECT	GO:0000276~mitochondrial proton-transporting ATP synthase complex, coupling factor F(o)	8	2.27273	3.2e-10	ATP5K, ATP5J, ATP5H, ATP5O, ATP5G2, ATP5G1, ATP5L, ATP5J2	0.0196433
GOTERM_CC_DIRECT	GO:0016282~eukaryotic 43S preinitiation complex	6	1.70455	3.91e-06	EIF3M, EIF3K, EIF3I, EIF3H, EIF3F, EIF3C	0.0206681
GOTERM_CC_DIRECT	GO:0033290~eukaryotic 48S preinitiation complex	6	1.70455	3.91e-06	EIF3M, EIF3K, EIF3I, EIF3H, EIF3F, EIF3C	0.0206681
GOTERM_CC_DIRECT	GO:0005852~eukaryotic translation initiation factor 3 complex	6	1.70455	5.61e-06	EIF3M, EIF3K, EIF3I, EIF3H, EIF3F, EIF3C	0.0206681
GOTERM_CC_DIRECT	GO:0022626~cytosolic ribosome	6	1.70455	1.43e-05	RPL5, RPL27A, RPL23, RPL11, RPL24, RPL29	0.0206681
GOTERM_BP_DIRECT	GO:1902600~hydrogen ion transmembrane transport	6	1.70455	1.67e-05	COX8A, COX7B, UQCRB, UQCR10, ATP5G2, ATP5G1	0.0206681
GOTERM_CC_DIRECT	GO:0036464~cytoplasmic ribonucleoprotein granule	6	1.70455	0.000106	RPS4X, RPS6, RPLP0, RPL28, RPL6, ACTB	0.0206681
GOTERM_BP_DIRECT	GO:0051881~regulation of mitochondrial membrane potential	6	1.70455	0.000124	PRELID1, UBB, BAX, PARK7, CLIC1, SOD1	0.0206681
GOTERM_BP_DIRECT	GO:0006414~translational elongation	6	1.70455	0.00146269	EEF1A1, EEF1B2, EEF1D, RPLP1, RPLP2, EEF2	0.0281458
GOTERM_CC_DIRECT	GO:0005758~mitochondrial intermembrane space	6	1.70455	0.00965711	NDUFA8, PRELID1, NDUFB7, PARK7, COX6B1, SOD1	0.0286092
GOTERM_BP_DIRECT	GO:0042254~ribosome biogenesis	6	1.70455	0.0216413	RPL7A, RPS28, EIF6, RPS18, RPL34, RPLP0	0.0286092
GOTERM_CC_DIRECT	GO:0071013~catalytic step 2 spliceosome	8	2.27273	0.00138954	PNN, HNRNPA3, SNRPD2, HNRNPH1, SRSF1, SNRPG, SNRPE, HNRNPA1	0.035174
GOTERM_CC_DIRECT	GO:0045263~proton-transporting ATP synthase complex, coupling factor F(o)	7	1.98864	2.17e-08	ATP5K, ATP5J, ATP5H, ATP5G2, ATP5G1, ATP5L, ATP5J2	0.0389987
GOTERM_BP_DIRECT	GO:0042273~ribosomal large subunit biogenesis	7	1.98864	3.18e-06	RPL5, EIF6, RPL11, RPL14, RPL35A, RPL26, RPL7	0.0396962
GOTERM_BP_DIRECT	GO:0001731~formation of translation preinitiation complex	7	1.98864	4.12e-06	EIF3M, EIF3K, EIF3I, EIF3H, RPS2, EIF3F, EIF3C	0.0455962

## Sheet: CD4_markers_cluster3
Category	Term	Count	%	PValue	Genes	Benjamini-Hochberg adj. P value
GOTERM_CC_DIRECT	GO:0005840~ribosome	80	22.7273	1.83e-90	RPL4, RPL5, RPL30, RPL3, RPL32, MRPS14, RPL31, RPL34, RPLP1, RPLP0, RPL10A, RPL8, RPL9, RPL6, RPL7, MRPL33, RPS4X, RPS15, RPL7A, RPS14, RPS17, RPS16, RPL18A, RPS19, RPS18, RPL36, RPLP2, RPL38, RPS11, RPS10, RPL39, RPS13, RPS9, RPS7, RPL21, RPS8, RPS5, RPL23, RPS6, RPL22, RPL13A, RPSA, MRPL52, RPL37A, RPL24, RPL27, RPL29, UBA52, RPL28, RPL10, RPL12, RPL11, RPL36A, MRPL54, RPS15A, RPL14, RPS3, RPL1…	6.49e-88
KEGG_PATHWAY	mmu03010:Ribosome	83	23.5795	8.63e-89	RPL4, RPL5, RPL30, RPL3, RPL32, MRPS14, RPL31, RPL34, RPLP1, RPLP0, RPL10A, RPL8, RPL9, RPL6, RPL7, MRPL33, RPS4X, RPS15, RPL7A, RPS14, RPS17, RPS16, RPL18A, RPS19, RPL36AL, RPS18, RPL36, RPL35, RPLP2, RPL38, RPL37, RPS11, RPS10, RPL39, RPS13, RPS12, RPS9, RPS7, RPL21, RPS8, RPS5, RPL23, RPS6, RPL22, RPL13A, RPSA, RPL37A, RPL24, RPL27, RPL26, RPL29, UBA52, RPL28, RPL10, RPL12, RPL11, RPL36A, RPS1…	1.55e-86
GOTERM_BP_DIRECT	GO:0006412~translation	95	26.9886	1.07e-79	RPL4, RPL5, RPL30, RPL3, RPL32, MRPS14, RPL31, RPL34, RPL10A, RPL8, RPL9, RPL6, RPL7, MRPL33, RPS4X, EEF1B2, RBM3, RPS15, RPL7A, RPS14, RPS17, RPS16, RPL18A, RPS19, RPL36AL, RPS18, RPL36, RACK1, RPL35, RPL38, RPL37, RPS11, RPL39, RPS13, RPS12, RPS9, RPS7, RPL21, RPS8, RPS5, RPL23, RPS6, RPL22, RPL13A, RPSA, EEF1A1, MRPL52, LARS2, EEF1D, RPL37A, RPL24, RPL27, RPL26, RPL29, UBA52, SLC25A4, RPL28, R…	1.44e-76
GOTERM_CC_DIRECT	GO:0030529~intracellular ribonucleoprotein complex	81	23.0114	1.46e-70	RPL4, RPL5, RPL30, RPL3, RPL32, MRPS14, RPL31, RPLP1, RPLP0, RPL10A, RPL8, RPL9, RPL6, ACTB, RPL7, MRPL33, RPS4X, RPS15, RPL7A, RPS14, RPS17, RPS16, RPL18A, SNRPD2, RPS19, RPS18, RPL36, RPLP2, RPL38, RPS11, RPS10, RPL39, RPS13, RPS9, RPS7, RPL21, RPS8, RPS5, RPL23, RPS6, RPL22, RPL13A, RPSA, MRPL52, HNRNPH1, RPL37A, RPL24, SNRPE, RPL27, GAPDH, RPL28, RPL12, RPL11, MRPL54, RPL14, RPS3, RPL13, RPS2…	2.59e-68
GOTERM_CC_DIRECT	GO:0022625~cytosolic large ribosomal subunit	48	13.6364	5.76e-59	RPL4, RPL5, RPL30, RPL3, RPL10, RPL32, RPL31, RPL12, RPL34, RPLP1, RPL11, RPLP0, RPL36A, RPL8, RPL10A, RPL9, RPL6, RPL7, RPL7A, RPL18A, RPL36AL, RPL36, RPL14, RPL13, RPLP2, RPL35, RPL38, RPL37, RPL15, RPL18, RPL17, RPL39, RPS12, RPL19, RPL21, RPL23, RPL22, RPL35A, RPL13A, RPL27A, RPL37A, RPL24, RPL27, RPL22L1, RPL26, RPL29, RPL28, UBA52	6.81e-57
GOTERM_CC_DIRECT	GO:0070062~extracellular exosome	168	47.7273	7.58e-57	RPL4, TXN1, RPL5, NDUFA13, RPL30, RPL3, RPL31, RPL34, H2-K1, ATP5C1, PARK7, ENO1, RPL10A, ACTB, RPL7, UBE2L3, TXNDC17, RPS14, RPS17, RPS16, LGALS1, RPS19, SNRPD2, RPS18, FTH1, ARHGDIB, CFL1, RPS11, RPS10, RPS13, RPS9, RPS7, RPS8, RPS5, RPL23, RPL22, SHISA5, HBB-BT, RPSA, MIF, HBB-BS, ATP5J2, EEF1A1, TWSG1, MYL6, SUB1, PSME1, RPL24, PSME2, SNRPE, RPL27, RPL26, PPIB, PFN1, PPIA, RPL28, S100A9, VPS2…	6.73e-55
GOTERM_CC_DIRECT	GO:0022627~cytosolic small ribosomal subunit	33	9.375	2.12e-43	HBA-A2, RPS4X, RPS15, RPS14, RPS17, RPS15A, RPS16, RPS19, RPS18, RPS3, RPS2, RPS11, RPS27A, RPS10, RPS13, RPS12, RPS9, RPS7, RPS8, RPS5, RPS6, RPSA, RPS26, RPS25, RPS28, RPS27, RPS29, RPS3A1, RPS20, FAU, RPS21, RPS24, RPS23	1.5e-41
GOTERM_CC_DIRECT	GO:0015935~small ribosomal subunit	21	5.96591	2.82e-29	RPS9, RPS5, RPS6, RPSA, RPS4X, RPS26, RPS15, RPS25, RPS28, RPS16, RPS18, RPS29, RACK1, RPS3, RPS20, RPS2, FAU, RPS27A, RPS21, RPS24, RPS23	1.67e-27
GOTERM_CC_DIRECT	GO:0005925~focal adhesion	51	14.4886	5.64e-29	RPL4, RPL5, RPL30, RPL3, RPL31, ARPC1B, RPLP0, RPL10A, RPL8, RPL9, RPL6, ACTB, RPL7, RPS4X, RPS15, RPL7A, RPS14, RPS17, RPS16, RPS19, RPS18, CFL1, RAC2, RPLP2, RPL38, RPS11, RPS10, RPS13, RPS9, RPS7, RPS8, RPS5, RPL23, RPL22, RPL13A, CYBA, RPL37A, RPL27, PFN1, PPIB, ATP6V0C, PPIA, RPL12, RPS3, RPS2, RPL18, RPL19, HSPA8, ARPC3, RPS29, RPS3A1	2.86e-27
KEGG_PATHWAY	mmu00190:Oxidative phosphorylation	37	10.5114	1.21e-23	NDUFB9, COX7B, NDUFA13, NDUFB7, UQCRB, NDUFA11, NDUFB11, NDUFA12, COX4I1, ATP5K, ATP5C1, ATP5J, COX7A2, UQCR10, ATP5H, ATP5G2, ATP5O, COX5B, COX7C, ATP5G1, COX5A, ATP5L, ATP5E, ATP5D, NDUFV3, NDUFV2, ATP6V1F, COX8A, NDUFA8, NDUFA7, NDUFA4, NDUFA3, NDUFA2, COX6C, ATP5J2, COX6B1, ATP6V0C	1.09e-21
KEGG_PATHWAY	mmu05012:Parkinson's disease	37	10.5114	1.61e-22	NDUFB9, COX7B, NDUFA13, NDUFB7, UQCRB, NDUFA11, NDUFB11, NDUFA12, COX4I1, ATP5C1, ATP5J, COX7A2, PARK7, UQCR10, ATP5H, ATP5G2, ATP5O, COX5B, COX7C, ATP5G1, COX5A, GNAI2, UBE2L3, UBB, ATP5E, ATP5D, NDUFV3, NDUFV2, COX8A, NDUFA8, NDUFA7, NDUFA4, NDUFA3, NDUFA2, COX6C, COX6B1, SLC25A4	9.64e-21
GOTERM_CC_DIRECT	GO:0031012~extracellular matrix	35	9.94318	1.46e-18	RPL30, RPL12, RPL11, ATP5O, RPL9, RPS14, RPS17, RPS15A, LGALS1, RPS16, RPS19, RPS18, PRDX1, CFL1, RPS3, RPS11, RPS10, RPS13, HSPA8, HSP90AA1, RPS7, RPS5, RPL23, RPL22, RPL35A, RPSA, EEF2, SOD1, RPS25, MYL6, PKM, RPS20, RPL27, GAPDH, S100A9	6.46e-17
KEGG_PATHWAY	mmu05010:Alzheimer's disease	35	9.94318	5.98e-18	NDUFB9, COX7B, NDUFA13, NDUFB7, UQCRB, NDUFA11, NDUFB11, NDUFA12, COX4I1, ATP5C1, ATP5J, COX7A2, UQCR10, ATP5H, ATP5G2, ATP5O, COX5B, COX7C, ATP5G1, COX5A, ATP5E, ATP5D, NDUFV3, NDUFV2, COX8A, PSENEN, NDUFA8, NDUFA7, NDUFA4, NDUFA3, NDUFA2, COX6C, COX6B1, CALM1, GAPDH	2.69e-16
KEGG_PATHWAY	mmu05016:Huntington's disease	36	10.2273	2.95e-17	NDUFB9, COX7B, NDUFA13, NDUFB7, UQCRB, NDUFA11, NDUFB11, NDUFA12, COX4I1, CLTA, ATP5C1, ATP5J, COX7A2, UQCR10, ATP5H, ATP5G2, ATP5O, COX5B, COX7C, ATP5G1, COX5A, ATP5E, ATP5D, NDUFV3, NDUFV2, COX8A, NDUFA8, NDUFA7, NDUFA4, NDUFA3, NDUFA2, COX6C, SOD1, COX6B1, BAX, SLC25A4	1.06e-15
GOTERM_CC_DIRECT	GO:0005743~mitochondrial inner membrane	37	10.5114	1.58e-16	NDUFB9, COX7B, NDUFA13, NDUFB7, UQCRB, NDUFA11, NDUFB11, NDUFA12, COX4I1, ATP5K, ATP5C1, ATP5J, COX7A2, UQCR10, ATP5H, ATP5O, COX5B, COX7C, ATP5G1, COX5A, ATP5L, ATP5E, ATP5D, RPS3, NDUFV3, NDUFV2, COX8A, NDUFA8, NDUFA7, GPX4, NDUFA4, NDUFA3, NDUFA2, COX6C, ATP5J2, COX6B1, SLC25A4	6.23e-15
GOTERM_BP_DIRECT	GO:0002479~antigen processing and presentation of exogenous peptide antigen via MHC class I, TAP-dependent	15	4.26136	2.81e-17	H2-T23, H2-Q7, H2-K1, PSMB10, PSMA7, PSMB8, PSMB9, PSMA3, PSMB5, PSMA4, PSMB2, PSMB3, PSMA2, PSMB1, H2-D1	1.89e-14
GOTERM_CC_DIRECT	GO:0005739~mitochondrion	79	22.4432	1.4e-15	TXN1, COX7B, NDUFA13, NDUFA11, MRPS14, NDUFA12, COX4I1, RPL34, ATP5C1, GIMAP5, PARK7, ETFB, RPL10A, ATP5G2, ATP5G1, COX7C, MRPL33, PYCARD, RPS14, FTH1, RACK1, TSPO, CLIC1, COX8A, GPX4, NME2, CYBA, ATP5J2, COX6B1, MRPL52, LARS2, PKM, SDHAF1, ALDOA, SLC25A4, GAPDH, NDUFB9, NDUFB7, UQCRB, NDUFB11, ATP5K, NOL7, ATP5J, COX7A2, UQCR10, SRI, ATP5H, ATP5O, COX5B, COX5A, MRPL54, ATP5L, NT5C, PRDX5, LDHA, …	4.97e-14
GOTERM_BP_DIRECT	GO:0002181~cytoplasmic translation	15	4.26136	2.51e-16	RPL31, RPLP1, RPLP0, RPL22, RPL35A, RPL8, RPL9, RPL6, RPL7, RPL36, RPLP2, RPL22L1, RPL26, RPL15, RPL29	1.12e-13
GOTERM_CC_DIRECT	GO:0043209~myelin sheath	25	7.10227	3.72e-14	ATP5C1, ENO1, ATP5H, ATP5O, COX5B, COX5A, ACTB, UBB, PRDX1, NDUFV2, RPS27A, HSPA8, HSP90AA1, NME2, HBB-BT, HBB-BS, MIF, SOD1, EEF1A1, PKM, ALDOA, PPIA, SLC25A4, GAPDH, UBA52	1.2e-12
GOTERM_CC_DIRECT	GO:0005839~proteasome core complex	11	3.125	3.32e-13	PSMA3, PSMB5, PSMA4, PSMB2, PSMA2, PSMB3, PSMB1, PSMB8, PSMB10, PSMA7, PSMB9	9.82e-12
GOTERM_CC_DIRECT	GO:0005747~mitochondrial respiratory chain complex I	14	3.97727	8.15e-13	NDUFB9, NDUFA8, NDUFA13, NDUFA7, NDUFB7, NDUFA11, NDUFB11, NDUFA4, NDUFA12, NDUFA3, NDUFA2, PARK7, NDUFV3, NDUFV2	2.23e-11
GOTERM_CC_DIRECT	GO:0005829~cytosol	74	21.0227	2.32e-12	TXN1, IGHM, UBXN1, PARK7, GIMAP6, ACTB, TXNDC17, PYCARD, LGALS1, SNRPD2, RPS19, RPS18, TMSB4X, ARHGDIB, CFL1, RAC2, RACK1, GABARAPL2, HSP90AA1, GPX4, RPSA, RBX1, EEF1A1, PSMA3, PSMA4, PSMA2, SNRPG, SNRPE, PFN1, UBA52, PPIA, GAPDH, SKAP1, VPS28, ANP32A, SRI, CORO1A, OAZ1, GABARAP, PSMA7, PSMB10, GNAI2, DNAJB1, PRDX5, LDHA, HSPH1, PSMB5, MAT2A, UBB, PSMB2, PSMB3, PDCD10, PRDX1, PSMB1, RPS3, RPS27A,…	5.88e-11
GOTERM_CC_DIRECT	GO:0005737~cytoplasm	177	50.2841	3.97e-12	RPL4, TXN1, RPL5, NDUFA13, RPL30, RPL3, PARK7, ENO1, RPL8, RPL10A, GIMAP6, RPL9, RPL6, ACTB, RPL7, UBE2L3, TXNDC17, PYCARD, RPS15, EEF1B2, PNN, RPS14, LGALS1, RPS19, SNRPD2, RPS18, ARHGDIB, CFL1, RPL35, RPS11, RPS10, TMSB10, GABARAPL2, RPS9, RPS7, RPL21, RPS8, RPL23, RPS6, RPL22, CIRBP, CYBA, RPSA, MIF, RBX1, EEF1A1, PSME1, RPL24, PSME2, SNRPE, PFN1, PPIA, UBA52, RPL28, ZFPM1, S100A9, VPS28, SKAP…	9.39e-11
GOTERM_CC_DIRECT	GO:0005730~nucleolus	47	13.3523	4.6e-12	RPL4, RPL5, RPL3, RPL31, RPL12, RPL34, RPL11, NOL7, RPL8, RPL10A, RPL9, RPL6, RPL7, RBM3, PYCARD, RPS14, DNAJB1, RPL7A, RPS19, PRDX1, RPL36, RPS3, RPS11, RPS27A, RPL18, RPS10, RPS13, RPL19, HSPA8, RPS9, RPS7, RPL21, RPL23, RPS6, CIRBP, RPL13A, EDF1, MRPL23, RPS26, EEF1A1, RPS25, EIF6, EEF1D, RPS3A1, SUB1, XRN2, RPS23	1.02e-10
GOTERM_CC_DIRECT	GO:0005753~mitochondrial proton-transporting ATP synthase complex	10	2.84091	5.28e-12	ATP5E, ATP5D, ATP5K, ATP5J, ATP5C1, ATP5H, ATP5O, ATP5G1, ATP5L, ATP5J2	1.1e-10
GOTERM_BP_DIRECT	GO:0000028~ribosomal small subunit assembly	11	3.125	8.53e-13	RPS15, RPS25, RPS14, RPS17, RPS28, RPS27, RPS19, RPS5, RPSA, RPS2, RPS10	2.87e-10
GOTERM_CC_DIRECT	GO:0070469~respiratory chain	14	3.97727	1.54e-11	NDUFB9, NDUFA8, NDUFA7, NDUFB7, UQCRB, NDUFA11, NDUFB11, NDUFA4, NDUFA12, NDUFA3, NDUFA2, UQCR10, NDUFV3, NDUFV2	2.95e-10
GOTERM_CC_DIRECT	GO:0016020~membrane	182	51.7045	1.58e-11	RPL4, RPL5, RPL30, RPL32, NDUFA11, NDUFA12, RPL31, H2-K1, ATP5C1, GIMAP5, PARK7, ENO1, RPL8, RPL10A, RPL9, RPL6, ACTB, RPL7, RPS15, PNN, RPS14, KRTCAP2, RPS17, RPS16, RPL18A, RPS19, RPS18, ARHGDIB, CFL1, RPL36, RPL35, RPS11, RPS10, TNFRSF4, RPS13, RPS12, WDR83OS, RPS9, RPS7, RPL21, RPS8, RPS5, RPL23, RPS6, SHISA5, CYBA, RPSA, ATP5J2, EEF1A1, DPM1, TMEM134, MYL6, XRN2, RPL24, PSME2, ERH, RPL27, PT…	2.95e-10
KEGG_PATHWAY	mmu04932:Non-alcoholic fatty liver disease (NAFLD)	26	7.38636	1.68e-11	NDUFB9, COX7B, NDUFA13, NDUFB7, UQCRB, NDUFA11, NDUFB11, NDUFA12, COX4I1, COX7A2, UQCR10, COX5B, COX7C, COX5A, NDUFV3, NDUFV2, COX8A, NDUFA8, NDUFA7, NDUFA4, NDUFA3, NDUFA2, COX6C, NFKB1, COX6B1, BAX	5.03e-10
GOTERM_CC_DIRECT	GO:0000502~proteasome complex	14	3.97727	8.82e-11	UBXN1, PSMB10, PSMA7, PSMB8, PSMB9, PSMA3, PSMB5, PSMA4, PSMB2, PSMB3, PSMA2, PSMB1, PSME1, PSME2	1.57e-09
GOTERM_CC_DIRECT	GO:0000276~mitochondrial proton-transporting ATP synthase complex, coupling factor F(o)	8	2.27273	3.2e-10	ATP5K, ATP5J, ATP5H, ATP5O, ATP5G2, ATP5G1, ATP5L, ATP5J2	5.4e-09
GOTERM_CC_DIRECT	GO:0005634~nucleus	157	44.6023	1.77e-09	RPL4, TXN1, RPL5, NDUFA13, RPL30, RPL3, PARK7, ENO1, RPL10A, RPL9, RPL6, RPL7, UBE2L3, PYCARD, PNN, LGALS1, SNRPD2, RPS18, RPL36AL, FTH1, CFL1, RPS10, RPS13, RPS9, RPS7, RPS8, RPS6, RPL22, SHISA5, CIRBP, CYBA, RPSA, MIF, ATP5J2, RBX1, EEF1A1, DPM1, MORF4L1, SUB1, XRN2, SNRPE, RPL27, PKP3, PPIB, PFN1, FKBP3, PPIA, UBA52, ZFPM1, S100A9, SKAP1, S100A8, ANP32A, ATP5O, OAZ1, PRDX5, LDHA, HSPH1, UBB, P…	2.86e-08
GOTERM_BP_DIRECT	GO:0015986~ATP synthesis coupled proton transport	10	2.84091	1.09e-10	ATP5E, ATP5D, ATP5K, ATP5J, ATP5C1, ATP5H, ATP5O, ATP5G2, ATP5G1, ATP5L	2.92e-08
GOTERM_BP_DIRECT	GO:0015992~proton transport	13	3.69318	3.68e-10	ATP5K, ATP5C1, ATP5J, ATP5H, ATP5G2, ATP5O, ATP5G1, ATP5L, ATP5J2, ATP5E, ATP5D, ATP6V0C, ATP6V1F	8.25e-08
GOTERM_CC_DIRECT	GO:0005622~intracellular	61	17.3295	8.41e-09	RPL5, RPL30, RPL3, RPL32, MRPS14, RPL31, RPLP1, RPLP0, RPL8, RPL9, RPL6, MRPL33, RPS4X, HINT1, RPS17, LGALS1, RPS19, RPS18, SEC61G, CFL1, RAC2, RPL36, RPLP2, RPL38, RPS11, RPL39, RPS13, GABARAPL2, HSP90AA1, RPS9, RPS7, RPL21, RPS8, RPL22, SHISA5, RPSA, RPL37A, UBA52, RPL28, RPL11, SRI, RPL14, RPL13, RPL15, RPL18, RPL17, RPL19, HSPA8, RPL35A, MRPL23, SPCS2, RPS28, RPS29, RPS3A1, RPL27A, BAX, RPL22…	1.3e-07
GOTERM_CC_DIRECT	GO:0015934~large ribosomal subunit	8	2.27273	1.17e-08	RPL4, RBM3, RPL27A, RPL13A, RPL26, RPL8, RPL10A, RPL17	1.74e-07
KEGG_PATHWAY	mmu03050:Proteasome	13	3.69318	9.02e-09	PSMB10, PSMA7, PSMB8, PSMB9, PSMA3, PSMB5, PSMA4, PSMB2, PSMB3, PSMA2, PSMB1, PSME1, PSME2	2.32e-07
GOTERM_CC_DIRECT	GO:0045263~proton-transporting ATP synthase complex, coupling factor F(o)	7	1.98864	2.17e-08	ATP5K, ATP5J, ATP5H, ATP5G2, ATP5G1, ATP5L, ATP5J2	3.08e-07
GOTERM_BP_DIRECT	GO:0006754~ATP biosynthetic process	9	2.55682	3.69e-09	PKM, ATP5E, ATP5D, ATP5K, ATP5C1, ATP5O, ALDOA, ATP5L, ATP5J2	7.09e-07
GOTERM_BP_DIRECT	GO:0051603~proteolysis involved in cellular protein catabolic process	12	3.40909	4.42e-09	PSMA3, PSMB5, PSMA4, PSMB2, PSMA2, PSMB3, PSMB1, CTSS, PSMB8, PSMB10, PSMA7, PSMB9	7.44e-07
GOTERM_BP_DIRECT	GO:0042274~ribosomal small subunit biogenesis	8	2.27273	2.28e-08	RPS15, RPS17, RPS28, RPS16, RPS7, RPS19, RPS6, RPS24	3.41e-06
GOTERM_BP_DIRECT	GO:0046034~ATP metabolic process	10	2.84091	2.78e-08	HSPA8, ATP5D, ATP5K, ATP5J, ATP5C1, ATP5H, ATP5O, ATP5G1, ATP5L, ATP5J2	3.74e-06
GOTERM_CC_DIRECT	GO:0005913~cell-cell adherens junction	21	5.96591	6.96e-07	HSPA8, PARK7, ENO1, EEF2, RPL6, RPS26, RPL7A, DNAJB1, LDHA, PKM, EEF1D, PRDX1, RACK1, RPL14, RPL24, RPS2, PKP3, RPL15, PFN1, ALDOA, CLIC1	9.51e-06
GOTERM_CC_DIRECT	GO:0033290~eukaryotic 48S preinitiation complex	6	1.70455	3.91e-06	EIF3M, EIF3K, EIF3I, EIF3H, EIF3F, EIF3C	4.79e-05
GOTERM_CC_DIRECT	GO:0016282~eukaryotic 43S preinitiation complex	6	1.70455	3.91e-06	EIF3M, EIF3K, EIF3I, EIF3H, EIF3F, EIF3C	4.79e-05
GOTERM_CC_DIRECT	GO:0005751~mitochondrial respiratory chain complex IV	6	1.70455	3.91e-06	COX8A, NDUFA4, COX4I1, COX5B, COX7C, COX5A	4.79e-05
GOTERM_BP_DIRECT	GO:0006364~rRNA processing	14	3.97727	4.14e-07	RPL5, RPS7, RPS6, RPL11, RPL35A, RPL7, RPS15, RPS17, RPS28, RPS16, RPS19, RPL14, RPL26, RPS24	5.06e-05
GOTERM_CC_DIRECT	GO:0005852~eukaryotic translation initiation factor 3 complex	6	1.70455	5.61e-06	EIF3M, EIF3K, EIF3I, EIF3H, EIF3F, EIF3C	6.63e-05
GOTERM_CC_DIRECT	GO:0071541~eukaryotic translation initiation factor 3 complex, eIF3m	5	1.42045	5.82e-06	EIF3M, EIF3I, EIF3H, EIF3F, EIF3C	6.67e-05
GOTERM_CC_DIRECT	GO:0022626~cytosolic ribosome	6	1.70455	1.43e-05	RPL5, RPL27A, RPL23, RPL11, RPL24, RPL29	0.000159
GOTERM_BP_DIRECT	GO:0042273~ribosomal large subunit biogenesis	7	1.98864	3.18e-06	RPL5, EIF6, RPL11, RPL14, RPL35A, RPL26, RPL7	0.000357
GOTERM_BP_DIRECT	GO:0001731~formation of translation preinitiation complex	7	1.98864	4.12e-06	EIF3M, EIF3K, EIF3I, EIF3H, RPS2, EIF3F, EIF3C	0.000427
GOTERM_BP_DIRECT	GO:0000027~ribosomal large subunit assembly	7	1.98864	5.28e-06	RPL5, RPL3, RPL10, RPL12, RPL11, RPL24, RPL6	0.000507
GOTERM_CC_DIRECT	GO:0005844~polysome	7	1.98864	9.09e-05	RPS4X, RPS25, RPS6, RPS3, EEF2, RPL17, RPL7	0.000978
GOTERM_CC_DIRECT	GO:0036464~cytoplasmic ribonucleoprotein granule	6	1.70455	0.000106	RPS4X, RPS6, RPLP0, RPL28, RPL6, ACTB	0.00111066
GOTERM_CC_DIRECT	GO:0042612~MHC class I protein complex	5	1.42045	0.000136	H2-T23, H2-Q7, H2-K1, H2-Q4, H2-D1	0.00137575
GOTERM_BP_DIRECT	GO:1902600~hydrogen ion transmembrane transport	6	1.70455	1.67e-05	COX8A, COX7B, UQCRB, UQCR10, ATP5G2, ATP5G1	0.00149652
KEGG_PATHWAY	mmu04260:Cardiac muscle contraction	11	3.125	0.000145	COX8A, COX7B, UQCRB, COX4I1, COX7A2, UQCR10, COX6C, COX5B, COX7C, COX5A, COX6B1	0.00326986
GOTERM_BP_DIRECT	GO:0006123~mitochondrial electron transport, cytochrome c to oxygen	5	1.42045	4.42e-05	COX8A, COX4I1, COX5B, COX7C, COX5A	0.00370786
GOTERM_BP_DIRECT	GO:0006413~translational initiation	8	2.27273	4.69e-05	EIF3M, EIF6, EIF3K, EIF3I, EIF3H, EIF3F, EIF3C, EIF1	0.00370786
GOTERM_CC_DIRECT	GO:0019773~proteasome core complex, alpha-subunit complex	4	1.13636	0.000398	PSMA3, PSMA4, PSMA2, PSMA7	0.00392948
GOTERM_CC_DIRECT	GO:0019013~viral nucleocapsid	5	1.42045	0.000502	HNRNPA3, SNRPD2, HNRNPH1, HNRNPD, HNRNPA1	0.00481904
GOTERM_CC_DIRECT	GO:0072562~blood microparticle	10	2.84091	0.000517	IGHM, HSPA8, IGKC, HBA-A2, HBB-BT, HBB-BS, PFN1, CLIC1, ACTB, JCHAIN	0.00483277
GOTERM_CC_DIRECT	GO:0031672~A band	5	1.42045	0.000834	RPL4, RPL15, RPL17, RPL6, RPL7	0.0075897
GOTERM_CC_DIRECT	GO:0034709~methylosome	4	1.13636	0.00100414	SNRPD2, SNRPG, SNRPE, ERH	0.00891171
GOTERM_BP_DIRECT	GO:0051881~regulation of mitochondrial membrane potential	6	1.70455	0.000124	PRELID1, UBB, BAX, PARK7, CLIC1, SOD1	0.00923732
GOTERM_CC_DIRECT	GO:0071013~catalytic step 2 spliceosome	8	2.27273	0.00138954	PNN, HNRNPA3, SNRPD2, HNRNPH1, SRSF1, SNRPG, SNRPE, HNRNPA1	0.0120314
GOTERM_CC_DIRECT	GO:0071556~integral component of lumenal side of endoplasmic reticulum membrane	4	1.13636	0.00199832	H2-T23, H2-Q7, H2-K1, H2-D1	0.0168905
GOTERM_BP_DIRECT	GO:0006446~regulation of translational initiation	6	1.70455	0.000277	EIF3M, EIF3K, EIF3I, EIF3F, EIF3C, EIF1	0.0196433
GOTERM_CC_DIRECT	GO:0005681~spliceosomal complex	9	2.55682	0.0025533	PNN, HSPA8, HNRNPA3, SNRPD2, HNRNPH1, SRSF1, SNRPE, HNRNPA1, LSM4	0.0206681
GOTERM_CC_DIRECT	GO:0031838~haptoglobin-hemoglobin complex	3	0.852273	0.00288036	HBA-A2, HBB-BT, HBB-BS	0.0206681
GOTERM_CC_DIRECT	GO:0042105~alpha-beta T cell receptor complex	3	0.852273	0.00288036	CD3G, CD3E, CD3D	0.0206681
GOTERM_CC_DIRECT	GO:0045261~proton-transporting ATP synthase complex, catalytic core F(1)	3	0.852273	0.00288036	ATP5E, ATP5D, ATP5C1	0.0206681
GOTERM_CC_DIRECT	GO:1990111~spermatoproteasome complex	3	0.852273	0.00288036	PSMB8, PSMB10, PSMB9	0.0206681
GOTERM_CC_DIRECT	GO:0033177~proton-transporting two-sector ATPase complex, proton-transporting domain	3	0.852273	0.00288036	ATP5G2, ATP6V0C, ATP5G1	0.0206681
GOTERM_CC_DIRECT	GO:0000275~mitochondrial proton-transporting ATP synthase complex, catalytic core F(1)	3	0.852273	0.00288036	ATP5E, ATP5D, ATP5C1	0.0206681
GOTERM_CC_DIRECT	GO:0005797~Golgi medial cisterna	4	1.13636	0.002911	H2-Q7, H2-K1, H2-Q4, H2-D1	0.0206681
GOTERM_CC_DIRECT	GO:0070971~endoplasmic reticulum exit site	4	1.13636	0.00404348	H2-Q7, H2-K1, H2-Q4, H2-D1	0.0281458
GOTERM_CC_DIRECT	GO:0001740~Barr body	3	0.852273	0.00427124	H3F3B, H2AFZ, H3F3A	0.0286092
GOTERM_CC_DIRECT	GO:0005746~mitochondrial respiratory chain	3	0.852273	0.00427124	NDUFA13, COX7B, COX7A2	0.0286092
GOTERM_BP_DIRECT	GO:0045727~positive regulation of translation	7	1.98864	0.000523	RBM3, RPS4X, EIF6, RPS3A1, HNRNPD, CIRBP, EEF2	0.035174
GOTERM_BP_DIRECT	GO:0098609~cell-cell adhesion	12	3.40909	0.000609	RPS26, DNAJB1, RPL7A, LDHA, EEF1D, PRDX1, RPL14, RPL15, RPS2, PKP3, ENO1, ALDOA	0.0389987
GOTERM_BP_DIRECT	GO:0006979~response to oxidative stress	10	2.84091	0.000649	PRDX5, PSMB5, GPX4, NDUFA12, PRDX1, RPS3, PARK7, NFKB1, ATOX1, SOD1	0.0396962
GOTERM_BP_DIRECT	GO:0031397~negative regulation of protein ubiquitination	6	1.70455	0.00078	DNAJA1, UBXN1, RPS3, TSPO, PARK7, VPS28	0.0455962

## Sheet: CD4_markers_cluster4
Category	Term	Count	%	PValue	Genes	Benjamini-Hochberg adj. P value
KEGG_PATHWAY	mmu03010:Ribosome	33	31.7308	2.69e-37	RPL10, RPL32, RPL34, RPL11, RPLP0, RPL8, RPL9, RPS4X, RPS15, RPS15A, RPL18A, RPS18, RPL36, RPL14, RPS3, RPL13, RPLP2, RPL15, RPS11, RPL17, RPS13, RPS12, RPL19, RPS9, RPS7, RPL21, RPL23A, RPL37A, RPL24, FAU, RPL26, RPL28, UBA52	2.34e-35
GOTERM_CC_DIRECT	GO:0005840~ribosome	31	29.8077	3.85e-37	RPL10, RPL32, RPL34, RPL11, RPLP0, RPL8, RPL9, RPS4X, RPS15, RPS15A, RPL18A, RPS18, RPL36, RPL14, RPS3, RPL13, RPLP2, RPL15, RPS11, RPL17, RPS13, RPL19, RPS9, RPS7, RPL21, RPL23A, RPL37A, RPL24, FAU, RPL28, UBA52	7.54e-35
GOTERM_MF_DIRECT	GO:0003735~structural constituent of ribosome	34	32.6923	2.74e-36	RPL10, RPL32, RPL34, RPL11, RPLP0, RPL8, RPL9, RPS4X, RPS15, RPS15A, RPL18A, RPS18, RPL36, RPL14, RPS3, RPL13, RPLP2, RPL15, RPS11, RPL17, RPS13, RPS12, RPL19, RPS9, NDUFA7, RPS7, RPL21, RPL23A, RPL37A, RPL24, FAU, RPL26, RPL28, UBA52	6.11e-34
GOTERM_CC_DIRECT	GO:0022625~cytosolic large ribosomal subunit	23	22.1154	1.54e-31	RPL10, RPL32, RPL21, RPL34, RPL11, RPLP0, RPL23A, RPL8, RPL9, RPL18A, RPL37A, RPL36, RPL14, RPL24, RPLP2, RPL13, RPL26, RPL15, RPL28, UBA52, RPL17, RPS12, RPL19	1.51e-29
GOTERM_BP_DIRECT	GO:0006412~translation	35	33.6538	6.33e-32	EIF4A2, RPL10, RPL32, RPL34, RPL11, RPL8, RPL9, RBM3, RPS4X, RPS15, RPS15A, RPL18A, RPS18, RPL36, RPL14, RPS3, RPL13, RPL15, RPS11, RPL17, RPS13, RPS12, RPL19, RPS9, RPS7, RPL21, RPL23A, EEF1G, RPL37A, RPL24, FAU, RPL26, RPL28, UBA52, EIF4G2	4.24e-29
GOTERM_MF_DIRECT	GO:0044822~poly(A) RNA binding	48	46.1538	7.53e-31	EIF4A2, HSP90AB1, RPL10, RPL32, ZFP207, RPL11, RPLP0, RPL8, RBM3, RPS4X, RPS15, RPS15A, LGALS1, RPL18A, RPS18, PCBP1, RPL36, RPL14, RPS3, RPL13, RPL15, RPS11, RPL17, RPS13, RPS12, RPL19, BTF3, HSPA8, HSP90AA1, RPS9, RPS7, RPL21, HSPE1, SFPQ, HNRNPH1, RPL37A, RPL24, S100A4, PABPC1, FAU, RPL26, PFN1, PPIB, PPIA, RPL28, H2-D1, TPT1, EIF4G2	8.4e-29
GOTERM_CC_DIRECT	GO:0030529~intracellular ribonucleoprotein complex	30	28.8462	1.61e-28	RPL32, RPL11, RPLP0, RPL8, RPL9, RPS4X, RPS15, RPL18A, RPS18, PCBP1, RPL36, RPL14, RPS3, RPL13, RPLP2, RPL15, RPS11, RPL17, RPS13, RPL19, HSPA8, RPS9, RPS7, RPL21, RPL23A, HNRNPH1, RPL37A, RPL24, PABPC1, RPL28	1.05e-26
GOTERM_CC_DIRECT	GO:0070062~extracellular exosome	53	50.9615	5.37e-20	HSP90AB1, WDR1, RPL34, RPLP0, PARK7, ITGAL, RPS4X, FTL1, LGALS1, RPS18, FTH1, TSPO, RPLP2, RPS11, CLIC1, RPS13, HSP90AA1, RPS9, RPS7, SSR4, NME2, EEF1G, DAD1, RPL37A, RPL24, TAGLN2, S100A4, PABPC1, RPL26, PFN1, PPIB, PPIA, RPL28, H2-D1, RPL11, RPS15A, HSPH1, PCBP1, RPL14, RPS3, RPL15, S100A11, S100A10, HSPA8, H3F3B, H3F3A, HSPE1, PSMB8, DNAJA1, MOB1A, NACA, ITM2B, TPT1	2.63e-18
GOTERM_CC_DIRECT	GO:0005925~focal adhesion	20	19.2308	9.25e-14	HSPA8, RPS9, RPS7, RPLP0, CYBA, RPL8, RPL9, RPS4X, RPS15, RPS18, RPL37A, RPS3, RPLP2, PABPC1, RPS11, PFN1, PPIB, PPIA, RPS13, RPL19	3.63e-12
GOTERM_CC_DIRECT	GO:0022627~cytosolic small ribosomal subunit	11	10.5769	1.19e-13	RPS15, RPS4X, RPS9, RPS15A, RPS7, RPS18, RPS3, FAU, RPS11, RPS13, RPS12	3.88e-12
GOTERM_CC_DIRECT	GO:0005622~intracellular	31	29.8077	1.67e-10	HSP90AB1, RPL32, RPL11, RPLP0, RPL8, RPL9, RPS4X, LGALS1, RPS18, RPL36, RPL14, RPL13, RPLP2, RPL15, RPS11, RPL17, RPS13, RPL19, HSPA8, HSP90AA1, RPS9, RPS7, RPL21, RPL23A, ARL4C, MOB1A, SPCS2, RPL37A, RPL28, UBA52, OGT	4.67e-09
GOTERM_CC_DIRECT	GO:0016020~membrane	66	63.4615	1.98e-09	HSP90AB1, RPL32, RPLP0, CD3G, PARK7, ITGAL, RPL8, RPL9, CD3D, RPS4X, RPS15, KRTCAP2, FTL1, CCND2, RPL18A, RPS18, RPL36, TSPO, RPLP2, RPS11, CLIC1, RPS13, RPS12, COX8A, CD52, HSP90AA1, RPS9, RPS7, RPL21, SSR4, CYBA, EMP3, ARL4C, EEF1G, HNRNPH1, DAD1, RPL24, PABPC1, LTB, RPL26, PFN1, PPIB, PPIA, RPL28, H2-D1, RPL10, RPL11, RPS15A, PCBP1, ATP5D, RPL14, RPS3, RPL13, RPL15, RPL19, OST4, HSPA8, NDUFA7,…	4.84e-08
GOTERM_MF_DIRECT	GO:0003723~RNA binding	21	20.1923	6.97e-09	EIF4A2, HSPA8, RPS9, RPL34, RPL11, RPL23A, PARK7, RPL8, RPL9, RBM3, RPS4X, RPS15, SFPQ, HNRNPH1, RPS18, PCBP1, RPS3, RPL13, PABPC1, RPS11, EIF4G2	3.9e-07
GOTERM_MF_DIRECT	GO:0019843~rRNA binding	8	7.69231	7.49e-09	RPS4X, RPS9, RPS18, RPL11, RPL23A, RPL8, RPS11, RPL9	3.9e-07
GOTERM_MF_DIRECT	GO:0070180~large ribosomal subunit rRNA binding	6	5.76923	8.74e-09	RPL37A, RPLP0, RPLP2, RPL23A, RPL17, RPL19	3.9e-07
GOTERM_CC_DIRECT	GO:0031012~extracellular matrix	12	11.5385	3.02e-07	HSPA8, SFPQ, HSP90AA1, LGALS1, RPS15A, RPS7, RPS18, RPL11, RPS3, RPS11, RPL9, RPS13	6.5e-06
GOTERM_CC_DIRECT	GO:0015935~small ribosomal subunit	6	5.76923	3.32e-07	RPS15, RPS4X, RPS9, RPS18, RPS3, FAU	6.5e-06
GOTERM_BP_DIRECT	GO:0002181~cytoplasmic translation	7	6.73077	2.43e-08	RPLP0, RPL36, RPLP2, RPL15, RPL26, RPL8, RPL9	8.12e-06
GOTERM_CC_DIRECT	GO:0005913~cell-cell adherens junction	12	11.5385	6.17e-07	EEF1G, HSPA8, HSP90AB1, PCBP1, RPL14, RPL24, TAGLN2, RPL15, PARK7, PFN1, CLIC1, EIF4G2	1.1e-05
GOTERM_MF_DIRECT	GO:0098641~cadherin binding involved in cell-cell adhesion	12	11.5385	3.81e-07	EEF1G, HSPA8, HSP90AB1, PCBP1, RPL14, RPL24, TAGLN2, RPL15, PARK7, PFN1, CLIC1, EIF4G2	1.41e-05
GOTERM_CC_DIRECT	GO:0005737~cytoplasm	58	55.7692	1.46e-06	DAZAP2, HSP90AB1, WDR1, ZFP207, RPLP0, PARK7, IKZF1, RPL8, RPL9, RPS4X, PYCARD, RBM3, RPS15, FTL1, CCND2, LGALS1, RPS18, TSPO, RPS11, CLIC1, TMSB10, HSP90AA1, RPS9, CNOT6L, RPS7, RPL21, NME2, CYBA, ARL4C, EEF1G, SFPQ, HNRNPH1, RPL24, PABPC1, PFN1, UBA52, PPIA, RPL28, RPL10, RPL11, CRIP1, RPS15A, HSPH1, UBB, PCBP1, RPL14, RPS3, S100A11, RPL19, BTF3, HSPA8, HSPE1, PSMB8, DNAJA1, NACA, OGT, TPT1, EI…	2.39e-05
GOTERM_CC_DIRECT	GO:0005730~nucleolus	17	16.3462	5.13e-06	HSPA8, RPS9, RPS7, RPL21, RPL34, ZFP207, RPL11, RPL8, RPL9, RBM3, PYCARD, CCND2, RPL36, RPS3, RPS11, RPS13, RPL19	7.74e-05
GOTERM_CC_DIRECT	GO:0005634~nucleus	52	50	1.6e-05	DAZAP2, ZFP207, RPLP0, PARK7, IKZF1, RPL9, RPS4X, PYCARD, RBM3, CCND2, LGALS1, RPS18, FTH1, CLIC1, RPS13, HSP90AA1, RPS9, CNOT6L, RPS7, NME2, CYBA, ARID1A, EEF1G, SFPQ, HNRNPH1, RPL37A, S100A4, PABPC1, PFN1, PPIB, UBA52, PPIA, TCF7, RPL11, HSPH1, UBB, PCBP1, RPS3, RPL13, RPL15, RPL17, S100A11, BTF3, HSPA8, H3F3B, H3F3A, RPL23A, PSMB8, DNAJA1, NACA, OGT, TPT1	0.000223
GOTERM_MF_DIRECT	GO:0042277~peptide binding	7	6.73077	1.23e-05	HSPA8, RPLP0, PPIB, PPIA, OGT, CRIP1, H2-D1	0.000392
GOTERM_CC_DIRECT	GO:0015934~large ribosomal subunit	4	3.84615	9.85e-05	RBM3, RPL26, RPL8, RPL17	0.00128761
GOTERM_CC_DIRECT	GO:0036464~cytoplasmic ribonucleoprotein granule	4	3.84615	0.000381	RPS4X, RPLP0, PABPC1, RPL28	0.0046706
GOTERM_CC_DIRECT	GO:0043209~myelin sheath	7	6.73077	0.000447	HSPA8, HSP90AA1, WDR1, UBB, NME2, PPIA, UBA52	0.00515049
GOTERM_MF_DIRECT	GO:1990932~5.8S rRNA binding	3	2.88462	0.000296	RPS9, RPS13, RPL19	0.00826334
GOTERM_BP_DIRECT	GO:0006457~protein folding	7	6.73077	6.53e-05	DNAJA1, HSPA8, HSP90AA1, HSP90AB1, HSPE1, PPIB, PPIA	0.0113184
GOTERM_BP_DIRECT	GO:0031397~negative regulation of protein ubiquitination	5	4.80769	6.77e-05	DNAJA1, RPS3, TSPO, PARK7, OGT	0.0113184
GOTERM_MF_DIRECT	GO:0051082~unfolded protein binding	5	4.80769	0.000776	DNAJA1, HSPA8, HSP90AA1, HSP90AB1, HSPE1	0.0192306
GOTERM_MF_DIRECT	GO:0003729~mRNA binding	6	5.76923	0.00112382	HSP90AA1, PCBP1, RPS3, PARK7, PABPC1, RPS13	0.0250612
GOTERM_BP_DIRECT	GO:0000027~ribosomal large subunit assembly	4	3.84615	0.000356	RPL10, RPL11, RPL24, RPL23A	0.0475987

## Sheet: CD4_markers_cluster5
Category	Term	Count	%	PValue	Genes	Benjamini-Hochberg adj. P value
KEGG_PATHWAY	mmu03010:Ribosome	19	33.9286	2.07e-22	RPS9, RPL32, RPS7, RPL21, RPL34, RPL11, RPL23A, MRPL33, RPS15, RPS15A, RPS18, RPL37A, RPS3, RPL24, RPLP2, RPL15, RPS11, UBA52, RPS12	1.36e-20
GOTERM_CC_DIRECT	GO:0005840~ribosome	18	32.1429	7.61e-22	RPS9, RPL32, RPS7, RPL21, RPL34, RPL11, RPL23A, MRPL33, RPS15, RPS15A, RPS18, RPL37A, RPS3, RPL24, RPLP2, RPL15, RPS11, UBA52	9.51e-20
GOTERM_MF_DIRECT	GO:0003735~structural constituent of ribosome	19	33.9286	2.92e-21	RPS9, RPL32, RPS7, RPL21, RPL34, RPL11, RPL23A, MRPL33, RPS15, RPS15A, RPS18, RPL37A, RPS3, RPL24, RPLP2, RPL15, RPS11, UBA52, RPS12	4.53e-19
GOTERM_BP_DIRECT	GO:0006412~translation	20	35.7143	5.97e-19	RPS9, RPL32, RPS7, RPL21, RPL34, RPL11, RPL23A, MRPL33, RBM3, RPS15, LARS2, RPS15A, RPS18, RPL37A, RPS3, RPL24, RPL15, RPS11, UBA52, RPS12	2.54e-16
GOTERM_MF_DIRECT	GO:0044822~poly(A) RNA binding	25	44.6429	5.97e-17	AHNAK, RPL32, RPL11, H2-Q4, RBM3, RPS15, RPS15A, LGALS1, RPS18, RPS3, RPL15, RPS11, RPS12, HSPA8, RPS9, RPS7, RPL21, HSPE1, XRN2, RPL37A, RPL24, PFN1, PPIB, PPIA, H2-D1	4.63e-15
GOTERM_CC_DIRECT	GO:0030529~intracellular ribonucleoprotein complex	16	28.5714	5.26e-15	HSPA8, RPS9, RPL32, RPS7, RPL21, RPL11, RPL23A, MRPL33, RPS15, RPS18, RPL37A, RPS3, RPL24, RPLP2, RPL15, RPS11	3.29e-13
GOTERM_CC_DIRECT	GO:0022625~cytosolic large ribosomal subunit	11	19.6429	5.49e-14	RPL21, RPL32, RPL34, RPL11, RPL37A, RPL24, RPLP2, RPL23A, RPL15, UBA52, RPS12	2.29e-12
GOTERM_CC_DIRECT	GO:0022627~cytosolic small ribosomal subunit	9	16.0714	1.52e-12	RPS15, RPS9, RPS15A, RPS7, RPS18, RPS3, HBA-A2, RPS11, RPS12	4.74e-11
GOTERM_CC_DIRECT	GO:0070062~extracellular exosome	29	51.7857	2.44e-11	AHNAK, RPL34, RPL11, H2-Q4, HBA-A2, CD79B, RPS15A, LGALS1, RPS18, RPS3, TSPO, RPLP2, RPL15, RPS11, S100A11, S100A10, HSPA8, RPS9, RPS7, HBB-BS, HSPE1, DNAJA1, RPL37A, S100A6, RPL24, PFN1, PPIB, PPIA, H2-D1	6.11e-10
GOTERM_CC_DIRECT	GO:0005925~focal adhesion	14	25	3.31e-11	HSPA8, RPS9, RPS7, AHNAK, CYBA, RPS15, RPS18, RPL37A, RPS3, RPLP2, RPS11, PFN1, PPIB, PPIA	6.89e-10
GOTERM_CC_DIRECT	GO:0016020~membrane	38	67.8571	8.51e-07	IGHM, AHNAK, RPL32, RPL11, H2-Q4, CD3G, HBA-A2, TNFRSF13C, RPS15, CD79B, RPS15A, SERP1, RPS18, RPS3, TSPO, RPLP2, RPL15, RPS11, RPS12, CD52, HSPA8, RPS9, RPS7, RPL21, CYBA, EMP3, HSPE1, DNAJA1, CD24A, XRN2, S100A6, RPL24, FXYD5, IFI27L2A, PFN1, PPIB, PPIA, H2-D1	1.52e-05
GOTERM_CC_DIRECT	GO:0031012~extracellular matrix	8	14.2857	1.51e-05	HSPA8, LGALS1, RPS15A, RPS7, RPS18, RPL11, RPS3, RPS11	0.000236
GOTERM_MF_DIRECT	GO:0019843~rRNA binding	5	8.92857	8.25e-06	RPS9, RPS18, RPL11, RPL23A, RPS11	0.000426
GOTERM_CC_DIRECT	GO:0015935~small ribosomal subunit	4	7.14286	6.8e-05	RPS15, RPS9, RPS18, RPS3	0.000945
GOTERM_CC_DIRECT	GO:0005622~intracellular	15	26.7857	7.62e-05	HSPA8, RPS9, RPL32, RPS7, RPL21, RPL11, RPL23A, MRPL33, LGALS1, RPS18, RPL37A, RPLP2, RPL15, RPS11, UBA52	0.000952
GOTERM_MF_DIRECT	GO:0042277~peptide binding	5	8.92857	0.000113	HSPA8, H2-Q4, PPIB, PPIA, H2-D1	0.0043885
GOTERM_CC_DIRECT	GO:0005730~nucleolus	10	17.8571	0.000436	RBM3, HSPA8, RPS9, RPS7, RPL21, RPL34, XRN2, RPL11, RPS3, RPS11	0.00495639
GOTERM_CC_DIRECT	GO:0072562~blood microparticle	5	8.92857	0.000487	IGHM, HSPA8, HBA-A2, HBB-BS, PFN1	0.00507267
GOTERM_MF_DIRECT	GO:0003723~RNA binding	10	17.8571	0.000201	RBM3, RPS15, HSPA8, RPS9, RPS18, RPL34, RPL11, RPS3, RPL23A, RPS11	0.00623765
GOTERM_MF_DIRECT	GO:0070180~large ribosomal subunit rRNA binding	3	5.35714	0.000633	RPL37A, RPLP2, RPL23A	0.0163587
GOTERM_CC_DIRECT	GO:0043209~myelin sheath	5	8.92857	0.00190376	HSPA8, UBB, HBB-BS, PPIA, UBA52	0.0183054
GOTERM_CC_DIRECT	GO:0005829~cytosol	13	23.2143	0.0028086	IGHM, HSPA8, AHNAK, DNAJA1, LGALS1, UBB, MAT2A, RPS18, S100A6, RPS3, PFN1, UBA52, PPIA	0.0250768
GOTERM_CC_DIRECT	GO:0045121~membrane raft	5	8.92857	0.00578131	CD24A, HSPA8, AHNAK, H2-D1, S100A10	0.0481776

## Sheet: CD4_markers_cluster6
Category	Term	Count	%	PValue	Genes	Benjamini-Hochberg adj. P value
KEGG_PATHWAY	mmu03010:Ribosome	34	30.0885	8.3e-38	RPL10, RPL32, RPL34, RPL11, RPLP0, RPL8, RPL9, RPS4X, RPS15, RPS15A, RPL18A, RPS18, RPL36, RPL14, RPS3, RPL13, RPL35, RPL15, RPS11, RPS10, RPL17, RPL39, RPS13, RPL19, RPS7, RPL21, RPS5, RPL23A, RPL37A, RPL24, FAU, RPL26, RPL28, UBA52	8.63e-36
GOTERM_CC_DIRECT	GO:0005840~ribosome	32	28.3186	7.98e-38	RPL10, RPL32, RPL34, RPL11, RPLP0, RPL8, RPL9, RPS4X, RPS15, RPS15A, RPL18A, RPS18, RPL36, RPL14, RPS3, RPL13, RPL15, RPS11, RPS10, RPL17, RPL39, RPS13, RPL19, RPS7, RPL21, RPS5, RPL23A, RPL37A, RPL24, FAU, RPL28, UBA52	1.49e-35
GOTERM_MF_DIRECT	GO:0003735~structural constituent of ribosome	34	30.0885	1.95e-35	RPL10, RPL32, RPL34, RPL11, RPLP0, RPL8, RPL9, RPS4X, RPS15, RPS15A, RPL18A, RPS18, RPL36, RPL14, RPS3, RPL13, RPL35, RPL15, RPS11, RPS10, RPL17, RPL39, RPS13, RPL19, RPS7, RPL21, RPS5, RPL23A, RPL37A, RPL24, FAU, RPL26, RPL28, UBA52	4.62e-33
GOTERM_CC_DIRECT	GO:0030529~intracellular ribonucleoprotein complex	34	30.0885	2.55e-33	RPL32, RPL11, RPLP0, RPL8, RPL9, RPS4X, RPS15, RPL18A, SNRNP70, RPS18, PCBP1, RPL36, RPL14, RPS3, RPL13, RPL15, RPS11, RPS10, RPL17, RPL39, RPS13, RPL19, HSPA8, RPS7, RPL21, RPS5, RPL23A, HNRNPH1, HNRNPA2B1, RPL37A, RPL24, PABPC1, GAPDH, RPL28	2.38e-31
GOTERM_MF_DIRECT	GO:0044822~poly(A) RNA binding	50	44.2478	7.16e-32	RPL32, ZFP207, RPLP0, RPL8, RPS4X, RBM3, RPS15, RPL18A, SNRNP70, RPS18, UBTF, RPL36, RPL35, RPS11, RPS10, RPS13, HSP90AA1, RPS7, RPL21, RPS5, PTBP3, SFPQ, HNRNPH1, RPL37A, RPL24, PABPC1, RPL26, PPIB, PPIA, RPL28, RPL10, RPL11, HSPD1, PURB, RPS15A, PCBP1, RPL14, RPS3, RPL13, RPL15, RPL17, RPL19, HSPA8, PRPF38B, HNRNPA2B1, FAU, TARDBP, TPT1, EIF3A, EIF4G2	8.49e-30
GOTERM_CC_DIRECT	GO:0022625~cytosolic large ribosomal subunit	23	20.354	7.96e-31	RPL10, RPL32, RPL21, RPL34, RPL11, RPLP0, RPL23A, RPL8, RPL9, RPL18A, RPL37A, RPL36, RPL14, RPL24, RPL35, RPL13, RPL26, RPL15, RPL28, UBA52, RPL39, RPL17, RPL19	4.96e-29
GOTERM_BP_DIRECT	GO:0006412~translation	35	30.9735	1.41e-30	RPL10, RPL32, RPL34, RPL11, RPL8, RPL9, RBM3, RPS4X, RPS15, RPS15A, RPL18A, RPS18, RPL36, RPL14, RPS3, RPL13, RPL35, RPL15, RPS11, RPL17, RPL39, RPS13, RPL19, RPS7, RPL21, RPS5, RPL23A, RPL37A, RPL24, FAU, RPL26, RPL28, UBA52, EIF3A, EIF4G2	9.73e-28
GOTERM_CC_DIRECT	GO:0022627~cytosolic small ribosomal subunit	13	11.5044	7.8e-17	RPS7, RPS5, HBA-A2, HBA-A1, RPS4X, RPS15, RPS15A, RPS18, RPS3, FAU, RPS11, RPS10, RPS13	3.65e-15
GOTERM_CC_DIRECT	GO:0005925~focal adhesion	20	17.6991	3.35e-13	HSPA8, RPS7, RPS5, RPLP0, RPL8, RPL9, RPS4X, RPS15, PTPRC, RPS18, RPL37A, RPS3, PABPC1, RPS11, PPIB, B2M, PPIA, RPS10, RPS13, RPL19	1.25e-11
GOTERM_CC_DIRECT	GO:0070062~extracellular exosome	46	40.708	4e-13	RPL34, RPL11, RPLP0, HBA-A2, HBA-A1, ITGAL, HSPD1, RPS4X, FTL1, RPS15A, RPS18, PCBP1, FTH1, PSAP, RPL14, RPS3, RPL15, RPS11, RPS10, B2M, RPS13, CAMP, HSPA8, HSP90AA1, RPS7, RPS5, H3F3A, HBB-BT, HBB-BS, MIF, PSMB8, DNAJA1, PTPRC, HNRNPA2B1, RPL37A, RPL24, PHIP, PABPC1, RPL26, PPIB, PPIA, GAPDH, RPL28, S100A9, S100A8, TPT1	1.25e-11
GOTERM_MF_DIRECT	GO:0003723~RNA binding	27	23.8938	2.11e-13	CELF1, RPL34, RPL11, RPL8, RPL9, RBM3, RPS4X, RPS15, PURB, SNRNP70, RPS18, PCBP1, RPS3, RPL13, RPS11, RPL39, HSPA8, RPS5, RPL23A, PTBP3, SFPQ, HNRNPH1, HNRNPA2B1, PABPC1, TARDBP, EIF3A, EIF4G2	1.66e-11
GOTERM_CC_DIRECT	GO:0031012~extracellular matrix	16	14.1593	6.42e-11	HSPA8, HSP90AA1, RPS7, RPS5, RPL11, RPL9, HSPD1, SFPQ, RPS15A, RPS18, RPS3, RPS11, GAPDH, S100A9, RPS10, RPS13	1.71e-09
GOTERM_MF_DIRECT	GO:0003729~mRNA binding	11	9.73451	9.48e-09	PURB, HSP90AA1, CELF1, SNRNP70, RPS5, PCBP1, RPS3, RPL35, PABPC1, EIF3A, RPS13	5.07e-07
GOTERM_MF_DIRECT	GO:0019843~rRNA binding	8	7.07965	1.07e-08	RPS4X, RPS18, RPS5, RPL11, RPL23A, RPL8, RPS11, RPL9	5.07e-07
GOTERM_CC_DIRECT	GO:0005737~cytoplasm	64	56.6372	8.2e-08	DAZAP2, CELF1, ZFP207, RPLP0, RPL8, RPL9, RPS4X, RBM3, RPS15, FTL1, SESN3, SNRNP70, RPS18, RPL35, RPS11, RPS10, TMSB10, B2M, CAMP, MAP4K2, HSP90AA1, CNOT6L, RPS7, RPL21, MIF, SFPQ, HNRNPH1, RPL24, PABPC1, PFDN5, UBA52, PPIA, GAPDH, RPL28, S100A9, S100A8, RPL10, RPL11, HSPD1, RPS15A, GRK2, UBB, PCBP1, KRIT1, RPL14, RPS3, RPL19, ARFGEF1, HSPA8, PSMB8, NFKB1, DNAJA1, NFKBIA, MKLN1, WNK1, ETNK1, HNRN…	1.92e-06
GOTERM_CC_DIRECT	GO:0043209~myelin sheath	11	9.73451	9.64e-08	HSPA8, HSP90AA1, UBB, HBB-BT, HBA-A1, MIF, HBB-BS, PPIA, GAPDH, UBA52, HSPD1	2e-06
GOTERM_CC_DIRECT	GO:0016020~membrane	65	57.5221	2.72e-07	RPL32, CELF1, RPLP0, HBA-A2, HBA-A1, ITGAL, RPL8, RPL9, RPS4X, LFNG, RPS15, FTL1, RPL18A, RPS18, RPL36, RPL35, RPS11, TNFRSF4, RPS10, B2M, RPS13, CD52, MAP4K2, HSP90AA1, RPS7, RPL21, RPS5, EMP3, HNRNPH1, RPL24, PABPC1, RPL26, PPIB, PPIA, GAPDH, RPL28, S100A9, S100A8, RPL10, RPL11, HSPD1, RPS15A, GRK2, PCBP1, KRIT1, RPL14, RPS3, RPL13, RPL15, RPL19, ARFGEF1, HSPA8, TMEM30A, LAPTM5, DNAJA1, PTPRC, …	5.09e-06
GOTERM_CC_DIRECT	GO:0005622~intracellular	27	23.8938	3.09e-07	RPL32, RPL11, RPLP0, RPL8, RPL9, RPS4X, RPS18, RPL36, RPL14, RPL13, RPL15, RPS11, RPL17, RPL39, RPS13, RPL19, MAP4K2, HSPA8, HSP90AA1, RPS7, RPL21, RPL23A, BC005537, RPL37A, RPL28, UBA52, OGT	5.26e-06
GOTERM_CC_DIRECT	GO:0015935~small ribosomal subunit	6	5.30973	4.65e-07	RPS15, RPS4X, RPS18, RPS5, RPS3, FAU	7.24e-06
GOTERM_CC_DIRECT	GO:0031838~haptoglobin-hemoglobin complex	4	3.53982	1.55e-06	HBA-A2, HBB-BT, HBA-A1, HBB-BS	2.24e-05
GOTERM_MF_DIRECT	GO:0031720~haptoglobin binding	4	3.53982	7.5e-07	HBA-A2, HBB-BT, HBA-A1, HBB-BS	2.96e-05
GOTERM_CC_DIRECT	GO:0005634~nucleus	57	50.4425	2.22e-06	DAZAP2, CELF1, ZFP207, RPLP0, RPL9, RPS4X, RBM3, SESN3, SNRNP70, RPS18, FTH1, UBTF, RPS10, RPS13, HSP90AA1, CNOT6L, RPS7, CSNK2A1, MIF, PPP2R5C, PTBP3, SFPQ, HNRNPH1, RPL37A, PHIP, PABPC1, PPIB, PFDN5, UBA52, PPIA, GAPDH, S100A9, S100A8, RPL11, PURB, UBB, PCBP1, RPS3, RPL13, RPL15, RPL17, ARFGEF1, HSPA8, PRPF38B, H3F3A, RPL23A, PSMB8, NFKB1, DNAJA1, NFKBIA, HNRNPA2B1, RGS10, TRIP12, TARDBP, OGT, …	2.96e-05
GOTERM_MF_DIRECT	GO:0070180~large ribosomal subunit rRNA binding	5	4.42478	1.01e-06	RPL37A, RPLP0, RPL23A, RPL17, RPL19	3.43e-05
GOTERM_CC_DIRECT	GO:0005730~nucleolus	18	15.9292	2.9e-06	ARFGEF1, HSPA8, RPS7, RPL21, RPL34, ZFP207, RPL11, RPL8, RPL9, RBM3, RPL36, RPS3, UBTF, RPS11, RPS10, EIF3A, RPS13, RPL19	3.61e-05
GOTERM_BP_DIRECT	GO:0002181~cytoplasmic translation	6	5.30973	1.46e-06	RPLP0, RPL36, RPL15, RPL26, RPL8, RPL9	0.000435
GOTERM_BP_DIRECT	GO:0098869~cellular oxidant detoxification	4	3.53982	1.89e-06	HBA-A2, HBB-BT, HBA-A1, HBB-BS	0.000435
GOTERM_CC_DIRECT	GO:0005833~hemoglobin complex	4	3.53982	4.31e-05	HBA-A2, HBB-BT, HBA-A1, HBB-BS	0.000503
GOTERM_CC_DIRECT	GO:0015934~large ribosomal subunit	4	3.53982	0.00012	RBM3, RPL26, RPL8, RPL17	0.00132522
GOTERM_BP_DIRECT	GO:0042026~protein refolding	4	3.53982	1.56e-05	HSPA8, HSP90AA1, B2M, HSPD1	0.00249655
GOTERM_BP_DIRECT	GO:0006397~mRNA processing	11	9.73451	1.8e-05	HSPA8, PRPF38B, SFPQ, CNOT6L, HNRNPH1, CELF1, PCBP1, HNRNPA2B1, PABPC1, TARDBP, PTBP3	0.00249655
GOTERM_MF_DIRECT	GO:0005344~oxygen transporter activity	4	3.53982	9.98e-05	HBA-A2, HBB-BT, HBA-A1, HBB-BS	0.0029579
GOTERM_CC_DIRECT	GO:0036464~cytoplasmic ribonucleoprotein granule	4	3.53982	0.000465	RPS4X, RPLP0, PABPC1, RPL28	0.0048298
GOTERM_MF_DIRECT	GO:0005515~protein binding	41	36.2832	0.000209	DAZAP2, RPL11, RPL8, RPS15, PURB, FTL1, GRK2, SESN3, PCBP1, KRIT1, RPS3, UBTF, TNFRSF4, RPL17, B2M, RPL39, HSPA8, HSP90AA1, TMEM30A, CNOT6L, CSNK2A1, RPL21, RPL23A, NFKB1, DNAJA1, NFKBIA, MKLN1, SFPQ, PTPRC, WNK1, IL2RA, RGS10, PABPC1, FAU, RPL26, TARDBP, PPIA, OGT, CLEC2D, EIF3A, EIF4G2	0.00551347
GOTERM_CC_DIRECT	GO:0072562~blood microparticle	6	5.30973	0.000804	HSPA8, IGKC, HBA-A2, HBB-BT, HBA-A1, HBB-BS	0.0079139
GOTERM_CC_DIRECT	GO:0005681~spliceosomal complex	6	5.30973	0.000889	HSPA8, PRPF38B, HNRNPH1, SNRNP70, HNRNPA2B1, PABPC1	0.00831202
GOTERM_BP_DIRECT	GO:0008380~RNA splicing	9	7.9646	8.13e-05	HSPA8, PRPF38B, SFPQ, HNRNPH1, CELF1, HNRNPA2B1, PABPC1, TARDBP, PTBP3	0.00937722
GOTERM_BP_DIRECT	GO:0006457~protein folding	7	6.19469	0.000102	DNAJA1, HSPA8, HSP90AA1, PPIB, PPIA, PFDN5, HSPD1	0.0100384
GOTERM_MF_DIRECT	GO:0019825~oxygen binding	4	3.53982	0.000444	HBA-A2, HBB-BT, HBA-A1, HBB-BS	0.0105341
GOTERM_MF_DIRECT	GO:0004601~peroxidase activity	4	3.53982	0.000752	HBA-A2, HBB-BT, HBA-A1, HBB-BS	0.0162124
GOTERM_MF_DIRECT	GO:0008017~microtubule binding	7	6.19469	0.00108188	ZFP207, KRIT1, RPS3, GAPDH, S100A9, TPT1, S100A8	0.0213671
GOTERM_MF_DIRECT	GO:0042277~peptide binding	5	4.42478	0.00208279	HSPA8, RPLP0, PPIB, PPIA, OGT	0.0379708
GOTERM_BP_DIRECT	GO:0000027~ribosomal large subunit assembly	4	3.53982	0.000449	RPL10, RPL11, RPL24, RPL23A	0.038664
GOTERM_BP_DIRECT	GO:0048821~erythrocyte development	4	3.53982	0.000503	HBA-A2, HBB-BT, HBA-A1, HBB-BS	0.038664

## Sheet: Reactome_results_cluster6
Pathway identifier	Pathway name	#Entities found	#Entities total	#Interactors found	#Interactors total	Entities ratio	Entities pValue	Entities FDR	#Reactions found	#Reactions total	Reactions ratio	Species identifier	Species name	Submitted entities found	Mapped entities	Submitted entities hit interactor	Interacts with	Found reaction identifiers
R-HSA-72312	rRNA processing	50	246	4	469	0.0161417	1.11e-16	5.22e-15	8	21	0.00148399	9606	Homo sapiens	mt-Nd4;Rps15;Rps18;Rps15a;Rpl18a;mt-Co1;Rpl13;Rpl35;Rpl14;Rpl36;Rpl15;Rpl17;Rpl39;Rps10;Rpl8;Rps11;Rpl9;Rpl19;Rps13;Ubb;Rpl10;Rpl32;Rpl11;Rpl34;Rps3;Rps4x;Rps7;Rps5;Rpl37a;Rpl24;Rpl26;Uba52;Rpl28;mt-Atp6;Rpl21;Rplp0;mt-Co2;mt-Co3;Rpl23a;Fau	Q9Y3U8;P23396;P62917;P62081;P62280;Q8TD47;P62750;P62277;P62910;P46783;P83731;P62913;P46782;P84098;P62244;P62888;P61313;P62841;P27635;P46776;P05388;P46779;Q9UNX3;P46778;P61513;P49207;ENST00000361624;P32969;P18621;P62891;P42766;P50914;ENST00000361381;P40429;P62899;ENST00000362079;P62979;ENST00000361899;P26373;ENST00000361739;Q96L21;P18077;Q96EH5;P62861;P61254;Q02543;P62987;P62701;P62269;P62424	Rps3;Hsp90aa1;Arfgef1;Tardbp	Q96GA3;P19338;Q9H0D6;P61247	R-HSA-6791223;R-HSA-6791222;R-HSA-6791221;R-HSA-6791218;R-HSA-6791228;R-HSA-6791227;R-HSA-6790906;R-HSA-6785722
R-HSA-9010553	Regulation of expression of SLITs and ROBOs	49	183	3	93	0.0120079	1.11e-16	5.22e-15	6	20	0.00141333	9606	Homo sapiens	Rps15;Rps18;Rps15a;Pabpc1;Rpl18a;Rpl13;Rpl35;Rpl14;Rpl36;Rpl15;Rpl17;Rpl39;Rps10;Rpl8;Rps11;Rpl9;Rpl19;Rps13;Ubb;Rpl10;Rpl32;Rpl11;Rpl34;Rps3;Psmb8;Rps4x;Rps7;Rps5;Rpl37a;Rpl24;Rpl26;Uba52;Rpl28;Rpl21;Rplp0;Rpl23a;Elob;Fau	P0CG47;Q9Y3U8;P23396;P62917;P62081;P62280;Q8TD47;P62750;P62277;P62910;P46783;P83731;P62913;P46782;P84098;P62244;P62888;P61313;P62841;P27635;P46776;P05388;P46779;Q9UNX3;P46778;P61513;P49207;P32969;P28062;P11940;P18621;P62891;P42766;P50914;P40429;P62899;P62979;P26373;Q96L21;P18077;Q96EH5;P62861;Q15370;P61254;Q02543;P62987;P62701;P62269;P62424	Pabpc1;Pcbp1;Eif3a	Q04637;P11940	R-HSA-9011289;R-HSA-9014652;R-HSA-9011313;R-HSA-8986083;R-HSA-9014610;R-HSA-9011300
R-HSA-376176	Signaling by ROBO receptors	49	235	7	406	0.0154199	1.11e-16	5.22e-15	8	60	0.00423998	9606	Homo sapiens	Rps15;Rps18;Rps15a;Pabpc1;Rpl18a;Rpl13;Rpl35;Rpl14;Rpl36;Rpl15;Rpl17;Rpl39;Rps10;Rpl8;Rps11;Rpl9;Rpl19;Rps13;Ubb;Rpl10;Rpl32;Rpl11;Rpl34;Rps3;Psmb8;Rps4x;Rps7;Rps5;Rpl37a;Rpl24;Rpl26;Uba52;Rpl28;Rpl21;Rplp0;Rpl23a;Elob;Fau	P0CG47;Q9Y3U8;P23396;P62917;P62081;P62280;Q8TD47;P62750;P62277;P62910;P46783;P83731;P62913;P46782;P84098;P62244;P62888;P61313;P62841;P27635;P46776;P05388;P46779;Q9UNX3;P46778;P61513;P49207;P32969;P28062;P11940;P18621;P62891;P42766;P50914;P40429;P62899;P62979;P26373;Q96L21;P18077;Q96EH5;P62861;Q15370;P61254;Q02543;P62987;P62701;P62269;P62424	Rpl10;Pabpc1;Pcbp1;Hsp90aa1;Eif3a;Rpl28;Csnk2a1	Q04637;P11940;P12931;P43146	R-HSA-9011241;R-HSA-9011289;R-HSA-9014652;R-HSA-373715;R-HSA-9011313;R-HSA-8986083;R-HSA-9014610;R-HSA-9011300
R-HSA-156827	L13a-mediated translational silencing of Ceruloplasmin expression	47	120	0	5	0.00787402	1.11e-16	5.22e-15	3	3	0.000212	9606	Homo sapiens	Rps15;Rps18;Rps15a;Pabpc1;Rpl18a;Rpl13;Rpl35;Rpl14;Rpl36;Rpl15;Rpl17;Rpl39;Rps10;Rpl8;Rps11;Eif3a;Rpl9;Rpl19;Rps13;Ubb;Rpl10;Rpl32;Rpl11;Rpl34;Rps3;Rps4x;Rps7;Rps5;Rpl37a;Rpl24;Rpl26;Uba52;Rpl28;Rpl21;Rplp0;Rpl23a;Fau				R-HSA-156832;R-HSA-156823;R-HSA-156826
R-HSA-72613	Eukaryotic Translation Initiation	47	130	4	103	0.00853018	1.11e-16	5.22e-15	16	21	0.00148399	9606	Homo sapiens	Rps15;Rps18;Rps15a;Pabpc1;Rpl18a;Rpl13;Rpl35;Rpl14;Rpl36;Rpl15;Rpl17;Rpl39;Rps10;Rpl8;Rps11;Eif3a;Rpl9;Rpl19;Rps13;Ubb;Rpl10;Rpl32;Rpl11;Rpl34;Rps3;Rps4x;Rps7;Rps5;Rpl37a;Rpl24;Rpl26;Uba52;Rpl28;Rpl21;Rplp0;Rpl23a;Fau	Q9Y3U8;P23396;P32969;P62917;P11940;P62081;P62280;P18621;Q8TD47;P62891;P42766;P62750;P62277;P50914;P40429;P62910;P62899;P46783;Q14152;P83731;P62979;P62913;P46782;P26373;Q96L21;P18077;Q96EH5;P84098;P62244;P62861;P61254;Q02543;P62987;P62888;P62701;P61313;P62269;P62841;P27635;P46776;P05388;P46779;P62424;Q9UNX3;P46778;P61513;P49207	Eif3a;Pabpc1;Pcbp1;Eif3a	Q04637;P11940;P23588;P47813;P06730	R-HSA-72673;R-HSA-72672;R-HSA-156832;R-HSA-72676;R-HSA-72647;R-HSA-72619;R-HSA-156808;R-HSA-72621;R-HSA-72622;R-HSA-72691;R-HSA-156823;R-HSA-72631;R-HSA-156826;R-HSA-72697;R-HSA-157849;R-HSA-72671
R-HSA-72737	Cap-dependent Translation Initiation	47	130	4	100	0.00853018	1.11e-16	5.22e-15	13	18	0.00127199	9606	Homo sapiens	Rps15;Rps18;Rps15a;Pabpc1;Rpl18a;Rpl13;Rpl35;Rpl14;Rpl36;Rpl15;Rpl17;Rpl39;Rps10;Rpl8;Rps11;Eif3a;Rpl9;Rpl19;Rps13;Ubb;Rpl10;Rpl32;Rpl11;Rpl34;Rps3;Rps4x;Rps7;Rps5;Rpl37a;Rpl24;Rpl26;Uba52;Rpl28;Rpl21;Rplp0;Rpl23a;Fau	Q9Y3U8;P23396;P32969;P62917;P11940;P62081;P62280;P18621;Q8TD47;P62891;P42766;P62750;P62277;P50914;P40429;P62910;P62899;P46783;Q14152;P83731;P62979;P62913;P46782;P26373;Q96L21;P18077;Q96EH5;P84098;P62244;P62861;P61254;Q02543;P62987;P62888;P62701;P61313;P62269;P62841;P27635;P46776;P05388;P46779;P62424;Q9UNX3;P46778;P61513;P49207	Eif3a;Pabpc1;Pcbp1;Eif3a	Q04637;P11940;P23588;P47813;P06730	R-HSA-72673;R-HSA-72672;R-HSA-72676;R-HSA-72647;R-HSA-72619;R-HSA-156808;R-HSA-72621;R-HSA-72622;R-HSA-72691;R-HSA-72631;R-HSA-72697;R-HSA-157849;R-HSA-72671
R-HSA-72766	Translation	47	339	6	409	0.0222441	1.11e-16	5.22e-15	31	99	0.00699597	9606	Homo sapiens	Rps15;Rps18;Rps15a;Pabpc1;Rpl18a;Rpl13;Rpl35;Rpl14;Rpl36;Rpl15;Rpl17;Rpl39;Rps10;Rpl8;Rps11;Eif3a;Rpl9;Rpl19;Rps13;Ubb;Rpl10;Rpl32;Rpl11;Rpl34;Rps3;Rps4x;Rps7;Rps5;Rpl37a;Rpl24;Rpl26;Uba52;Rpl28;Rpl21;Rplp0;Rpl23a;Fau	Q9Y3U8;P23396;P32969;P62917;P11940;P62081;P62280;P18621;Q8TD47;P62891;P42766;P62750;P62277;P50914;P40429;P62910;P62899;P46783;Q14152;P83731;P62979;P62913;P46782;P26373;Q96L21;P18077;Q96EH5;P84098;P62244;P62861;P61254;Q02543;P62987;P62888;P62701;P61313;P62269;P62841;P27635;P46776;P05388;P46779;P62424;Q9UNX3;P46778;P61513;P49207	Eif3a;Hspd1;Tpt1;Pabpc1;Pcbp1;Eif3a	Q04637;P47813;P49590;Q96I59;P11940;P23588;P29692;P06730	R-HSA-1799326;R-HSA-380227;R-HSA-72647;R-HSA-156808;R-HSA-380234;R-HSA-156823;R-HSA-156826;R-HSA-157849;R-HSA-72671;R-HSA-72673;R-HSA-72672;R-HSA-156832;R-HSA-141671;R-HSA-72676;R-HSA-156907;R-HSA-72619;R-HSA-141673;R-HSA-72621;R-HSA-156910;R-HSA-72622;R-HSA-156915;R-HSA-156912;R-HSA-72691;R-HSA-72631;R-HSA-72697;R-HSA-141691;R-HSA-1799330;R-HSA-156923;R-HSA-1799329;R-HSA-1799335;R-HSA-1799332
R-HSA-975956	Nonsense Mediated Decay (NMD) independent of the Exon Junction Complex (EJC)	46	101	1	24	0.0066273	1.11e-16	5.22e-15	1	1	7.07e-05	9606	Homo sapiens	Rps15;Rps18;Rps15a;Pabpc1;Rpl18a;Rpl13;Rpl35;Rpl14;Rpl36;Rpl15;Rpl17;Rpl39;Rps10;Rpl8;Rps11;Rpl9;Rpl19;Rps13;Ubb;Rpl10;Rpl32;Rpl11;Rpl34;Rps3;Rps4x;Rps7;Rps5;Rpl37a;Rpl24;Rpl26;Uba52;Rpl28;Rpl21;Rplp0;Rpl23a;Fau	Q9Y3U8;P23396;P32969;P62917;P11940;P62081;P62280;P18621;Q8TD47;P62891;P42766;P62750;P62277;P50914;P40429;P62910;P62899;P46783;P83731;P62979;P62913;P46782;P26373;Q96L21;P18077;Q96EH5;P84098;P62244;P62861;P61254;Q02543;P62987;P62888;P62701;P61313;P62269;P62841;P27635;P46776;P05388;P46779;P62424;Q9UNX3;P46778;P61513;P49207	Pabpc1	Q92900	R-HSA-927789
R-HSA-72689	Formation of a pool of free 40S subunits	46	106	1	7	0.00695538	1.11e-16	5.22e-15	2	2	0.000141	9606	Homo sapiens	Rps15;Rps18;Rps15a;Rpl18a;Rpl13;Rpl35;Rpl14;Rpl36;Rpl15;Rpl17;Rpl39;Rps10;Rpl8;Rps11;Eif3a;Rpl9;Rpl19;Rps13;Ubb;Rpl10;Rpl32;Rpl11;Rpl34;Rps3;Rps4x;Rps7;Rps5;Rpl37a;Rpl24;Rpl26;Uba52;Rpl28;Rpl21;Rplp0;Rpl23a;Fau	Q9Y3U8;P23396;P32969;P62917;P62081;P62280;P18621;Q8TD47;P62891;P42766;P62750;P62277;P50914;P40429;P62910;P62899;P46783;Q14152;P83731;P62979;P62913;P46782;P26373;Q96L21;P18077;Q96EH5;P84098;P62244;P62861;P61254;Q02543;P62987;P62888;P62701;P61313;P62269;P62841;P27635;P46776;P05388;P46779;P62424;Q9UNX3;P46778;P61513;P49207	Eif3a	P47813	R-HSA-72673;R-HSA-72676
R-HSA-72706	GTP hydrolysis and joining of the 60S ribosomal subunit	46	120	3	59	0.00787402	1.11e-16	5.22e-15	3	3	0.000212	9606	Homo sapiens	Rps15;Rps18;Rps15a;Rpl18a;Rpl13;Rpl35;Rpl14;Rpl36;Rpl15;Rpl17;Rpl39;Rps10;Rpl8;Rps11;Eif3a;Rpl9;Rpl19;Rps13;Ubb;Rpl10;Rpl32;Rpl11;Rpl34;Rps3;Rps4x;Rps7;Rps5;Rpl37a;Rpl24;Rpl26;Uba52;Rpl28;Rpl21;Rplp0;Rpl23a;Fau	Q9Y3U8;P23396;P32969;P62917;P62081;P62280;P18621;Q8TD47;P62891;P42766;P62750;P62277;P50914;P40429;P62910;P62899;P46783;Q14152;P83731;P62979;P62913;P46782;P26373;Q96L21;P18077;Q96EH5;P84098;P62244;P62861;P61254;Q02543;P62987;P62888;P62701;P61313;P62269;P62841;P27635;P46776;P05388;P46779;P62424;Q9UNX3;P46778;P61513;P49207	Eif3a;Pabpc1;Eif3a	Q04637;P23588;P47813;P06730	R-HSA-72672;R-HSA-72619;R-HSA-72671
R-HSA-927802	Nonsense-Mediated Decay (NMD)	46	124	3	95	0.00813648	1.11e-16	5.22e-15	6	6	0.000424	9606	Homo sapiens	Rps15;Rps18;Rps15a;Pabpc1;Rpl18a;Rpl13;Rpl35;Rpl14;Rpl36;Rpl15;Rpl17;Rpl39;Rps10;Rpl8;Rps11;Rpl9;Rpl19;Rps13;Ubb;Rpl10;Rpl32;Rpl11;Rpl34;Rps3;Rps4x;Rps7;Rps5;Rpl37a;Rpl24;Rpl26;Uba52;Rpl28;Rpl21;Rplp0;Rpl23a;Fau	Q9Y3U8;P23396;P32969;P62917;P11940;P62081;P62280;P18621;Q8TD47;P62891;P42766;P62750;P62277;P50914;P40429;P62910;P62899;P46783;P83731;P62979;P62913;P46782;P26373;Q96L21;P18077;Q96EH5;P84098;P62244;P62861;P61254;Q02543;P62987;P62888;P62701;P61313;P62269;P62841;P27635;P46776;P05388;P46779;P62424;Q9UNX3;P46778;P61513;P49207	Pabpc1;Pcbp1;Eif3a	Q04637;P11940;Q92900	R-HSA-927836;R-HSA-927789;R-HSA-927832;R-HSA-927830;R-HSA-927813;R-HSA-927889
R-HSA-975957	Nonsense Mediated Decay (NMD) enhanced by the Exon Junction Complex (EJC)	46	124	3	95	0.00813648	1.11e-16	5.22e-15	5	5	0.000353	9606	Homo sapiens	Rps15;Rps18;Rps15a;Pabpc1;Rpl18a;Rpl13;Rpl35;Rpl14;Rpl36;Rpl15;Rpl17;Rpl39;Rps10;Rpl8;Rps11;Rpl9;Rpl19;Rps13;Ubb;Rpl10;Rpl32;Rpl11;Rpl34;Rps3;Rps4x;Rps7;Rps5;Rpl37a;Rpl24;Rpl26;Uba52;Rpl28;Rpl21;Rplp0;Rpl23a;Fau	Q9Y3U8;P23396;P32969;P62917;P11940;P62081;P62280;P18621;Q8TD47;P62891;P42766;P62750;P62277;P50914;P40429;P62910;P62899;P46783;P83731;P62979;P62913;P46782;P26373;Q96L21;P18077;Q96EH5;P84098;P62244;P62861;P61254;Q02543;P62987;P62888;P62701;P61313;P62269;P62841;P27635;P46776;P05388;P46779;P62424;Q9UNX3;P46778;P61513;P49207	Pabpc1;Pcbp1;Eif3a	Q04637;P11940;Q92900	R-HSA-927836;R-HSA-927832;R-HSA-927830;R-HSA-927813;R-HSA-927889
R-HSA-168273	Influenza Viral RNA Transcription and Replication	46	173	2	127	0.0113517	1.11e-16	5.22e-15	3	14	0.000989	9606	Homo sapiens	Rps15;Rps18;Rps15a;Rpl18a;Rpl13;Rpl35;Rpl14;Rpl36;Rpl15;Rpl17;Rpl39;Rps10;Rpl8;Rps11;Rpl9;Rpl19;Hsp90aa1;Rps13;Ubb;Rpl10;Rpl32;Rpl11;Rpl34;Rps3;Rps4x;Rps7;Rps5;Rpl37a;Rpl24;Rpl26;Uba52;Rpl28;Rpl21;Rplp0;Rpl23a;Fau	Q9Y3U8;P23396;P07900;P32969;P62917;P62081;P62280;P18621;Q8TD47;P62891;P42766;P62750;P62277;P50914;P40429;P62910;P62899;P46783;P83731;P62979;P62913;P46782;P26373;Q96L21;P18077;Q96EH5;P84098;P62244;P62861;P61254;Q02543;P62987;P62888;P62701;P61313;P62269;P62841;P27635;P46776;P05388;P46779;P62424;Q9UNX3;P46778;P61513;P49207	Hsp90aa1;Hspa8	P07900	R-HSA-192704;R-HSA-192841;R-HSA-192830
R-HSA-168255	Influenza Infection	46	198	4	364	0.0129921	1.11e-16	5.22e-15	9	59	0.00416932	9606	Homo sapiens	Rps15;Rps18;Rps15a;Rpl18a;Rpl13;Rpl35;Rpl14;Rpl36;Rpl15;Rpl17;Rpl39;Rps10;Rpl8;Rps11;Rpl9;Rpl19;Hsp90aa1;Rps13;Ubb;Rpl10;Rpl32;Rpl11;Rpl34;Rps3;Rps4x;Rps7;Rps5;Rpl37a;Rpl24;Rpl26;Uba52;Rpl28;Rpl21;Rplp0;Rpl23a;Fau	Q9Y3U8;P23396;P07900;P32969;P62917;P62081;P62280;P18621;Q8TD47;P62891;P42766;P62750;P62277;P50914;P40429;P62910;P62899;P46783;P83731;P62979;P62913;P46782;P26373;Q96L21;P18077;Q96EH5;P84098;P62244;P62861;P61254;Q02543;P62987;P62888;P62701;P61313;P62269;P62841;P27635;P46776;P05388;P46779;P62424;Q9UNX3;P46778;P61513;P49207	Eif3a;Hsp90aa1;Pabpc1;Hspa8	P07900;P19525;Q86U42;P03485	R-HSA-168883;R-HSA-192704;R-HSA-168896;R-HSA-195926;R-HSA-192746;R-HSA-168299;R-HSA-192841;R-HSA-192830;R-HSA-168894
R-HSA-71291	Metabolism of amino acids and derivatives	46	667	0	270	0.0437664	1.11e-16	5.22e-15	3	285	0.0201399	9606	Homo sapiens	Rps15;Rps18;Rps15a;Rpl18a;Rpl13;Rpl35;Rpl14;Rpl36;Rpl15;Rpl17;Rpl39;Rps10;Rpl8;Rps11;Rpl9;Rpl19;Rps13;Ubb;Rpl10;Rpl32;Rpl11;Rpl34;Rps3;Psmb8;Rps4x;Rps7;Rps5;Rpl37a;Rpl24;Rpl26;Uba52;Rpl28;Rpl21;Rplp0;Rpl23a;Fau				R-HSA-353125;R-HSA-2408529;R-HSA-5333615
R-HSA-192823	Viral mRNA Translation	45	114	0	23	0.00748032	1.11e-16	5.22e-15	2	2	0.000141	9606	Homo sapiens	Rps15;Rps18;Rps15a;Rpl18a;Rpl13;Rpl35;Rpl14;Rpl36;Rpl15;Rpl17;Rpl39;Rps10;Rpl8;Rps11;Rpl9;Rpl19;Rps13;Ubb;Rpl10;Rpl32;Rpl11;Rpl34;Rps3;Rps4x;Rps7;Rps5;Rpl37a;Rpl24;Rpl26;Uba52;Rpl28;Rpl21;Rplp0;Rpl23a;Fau				R-HSA-192704;R-HSA-192841
R-HSA-1799339	SRP-dependent cotranslational protein targeting to membrane	45	119	0	0	0.0078084	1.11e-16	5.22e-15	5	5	0.000353	9606	Homo sapiens	Rps15;Rps18;Rps15a;Rpl18a;Rpl13;Rpl35;Rpl14;Rpl36;Rpl15;Rpl17;Rpl39;Rps10;Rpl8;Rps11;Rpl9;Rpl19;Rps13;Ubb;Rpl10;Rpl32;Rpl11;Rpl34;Rps3;Rps4x;Rps7;Rps5;Rpl37a;Rpl24;Rpl26;Uba52;Rpl28;Rpl21;Rplp0;Rpl23a;Fau				R-HSA-1799326;R-HSA-1799330;R-HSA-1799329;R-HSA-1799335;R-HSA-1799332
R-HSA-6791226	Major pathway of rRNA processing in the nucleolus and cytosol	45	189	4	408	0.0124016	1.11e-16	5.22e-15	6	7	0.000495	9606	Homo sapiens	Rps15;Rps18;Rps15a;Rpl18a;Rpl13;Rpl35;Rpl14;Rpl36;Rpl15;Rpl17;Rpl39;Rps10;Rpl8;Rps11;Rpl9;Rpl19;Rps13;Ubb;Rpl10;Rpl32;Rpl11;Rpl34;Rps3;Rps4x;Rps7;Rps5;Rpl37a;Rpl24;Rpl26;Uba52;Rpl28;Rpl21;Rplp0;Rpl23a;Fau	Q9Y3U8;P23396;P32969;P62917;P62081;P62280;P18621;Q8TD47;P62891;P42766;P62750;P62277;P50914;P40429;P62910;P62899;P46783;P83731;P62979;P62913;P46782;P26373;Q96L21;P18077;Q96EH5;P84098;P62244;P62861;P61254;Q02543;P62987;P62888;P62701;P61313;P62269;P62841;P27635;P46776;P05388;P46779;P62424;Q9UNX3;P46778;P61513;P49207	Rps3;Hsp90aa1;Arfgef1;Tardbp	Q96GA3;P19338;Q9H0D6;P61247	R-HSA-6791223;R-HSA-6791222;R-HSA-6791221;R-HSA-6791218;R-HSA-6791228;R-HSA-6791227
R-HSA-156902	Peptide chain elongation	45	97	0	6	0.00636483	1.11e-16	5.22e-15	4	5	0.000353	9606	Homo sapiens	Rps15;Rps18;Rps15a;Rpl18a;Rpl13;Rpl35;Rpl14;Rpl36;Rpl15;Rpl17;Rpl39;Rps10;Rpl8;Rps11;Rpl9;Rpl19;Rps13;Ubb;Rpl10;Rpl32;Rpl11;Rpl34;Rps3;Rps4x;Rps7;Rps5;Rpl37a;Rpl24;Rpl26;Uba52;Rpl28;Rpl21;Rplp0;Rpl23a;Fau				R-HSA-156915;R-HSA-156912;R-HSA-156923;R-HSA-156907
R-HSA-72764	Eukaryotic Translation Termination	45	106	0	4	0.00695538	1.11e-16	5.22e-15	3	5	0.000353	9606	Homo sapiens	Rps15;Rps18;Rps15a;Rpl18a;Rpl13;Rpl35;Rpl14;Rpl36;Rpl15;Rpl17;Rpl39;Rps10;Rpl8;Rps11;Rpl9;Rpl19;Rps13;Ubb;Rpl10;Rpl32;Rpl11;Rpl34;Rps3;Rps4x;Rps7;Rps5;Rpl37a;Rpl24;Rpl26;Uba52;Rpl28;Rpl21;Rplp0;Rpl23a;Fau				R-HSA-141671;R-HSA-141691;R-HSA-141673
R-HSA-156842	Eukaryotic Translation Elongation	45	102	1	59	0.00669291	1.11e-16	5.22e-15	5	9	0.000636	9606	Homo sapiens	Rps15;Rps18;Rps15a;Rpl18a;Rpl13;Rpl35;Rpl14;Rpl36;Rpl15;Rpl17;Rpl39;Rps10;Rpl8;Rps11;Rpl9;Rpl19;Rps13;Ubb;Rpl10;Rpl32;Rpl11;Rpl34;Rps3;Rps4x;Rps7;Rps5;Rpl37a;Rpl24;Rpl26;Uba52;Rpl28;Rpl21;Rplp0;Rpl23a;Fau	Q9Y3U8;P23396;P32969;P62917;P62081;P62280;P18621;Q8TD47;P62891;P42766;P62750;P62277;P50914;P40429;P62910;P62899;P46783;P83731;P62979;P62913;P46782;P26373;Q96L21;P18077;Q96EH5;P84098;P62244;P62861;P61254;Q02543;P62987;P62888;P62701;P61313;P62269;P62841;P27635;P46776;P05388;P46779;P62424;Q9UNX3;P46778;P61513;P49207	Tpt1	P29692	R-HSA-156915;R-HSA-156912;R-HSA-156923;R-HSA-156907;R-HSA-156910
R-HSA-8868773	rRNA processing in the nucleus and cytosol	45	208	4	414	0.0136483	1.11e-16	5.22e-15	7	15	0.00106	9606	Homo sapiens	Rps15;Rps18;Rps15a;Rpl18a;Rpl13;Rpl35;Rpl14;Rpl36;Rpl15;Rpl17;Rpl39;Rps10;Rpl8;Rps11;Rpl9;Rpl19;Rps13;Ubb;Rpl10;Rpl32;Rpl11;Rpl34;Rps3;Rps4x;Rps7;Rps5;Rpl37a;Rpl24;Rpl26;Uba52;Rpl28;Rpl21;Rplp0;Rpl23a;Fau	Q9Y3U8;P23396;P32969;P62917;P62081;P62280;P18621;Q8TD47;P62891;P42766;P62750;P62277;P50914;P40429;P62910;P62899;P46783;P83731;P62979;P62913;P46782;P26373;Q96L21;P18077;Q96EH5;P84098;P62244;P62861;P61254;Q02543;P62987;P62888;P62701;P61313;P62269;P62841;P27635;P46776;P05388;P46779;P62424;Q9UNX3;P46778;P61513;P49207	Rps3;Hsp90aa1;Arfgef1;Tardbp	Q96GA3;P19338;Q9H0D6;P61247	R-HSA-6791223;R-HSA-6791222;R-HSA-6791221;R-HSA-6791218;R-HSA-6791228;R-HSA-6791227;R-HSA-6790906
R-HSA-9633012	Response of EIF2AK4 (GCN2) to amino acid deficiency	45	115	1	195	0.00754593	1.11e-16	5.22e-15	5	16	0.00113066	9606	Homo sapiens	Rps15;Rps18;Rps15a;Rpl18a;Rpl13;Rpl35;Rpl14;Rpl36;Rpl15;Rpl17;Rpl39;Rps10;Rpl8;Rps11;Rpl9;Rpl19;Rps13;Ubb;Rpl10;Rpl32;Rpl11;Rpl34;Rps3;Rps4x;Rps7;Rps5;Rpl37a;Rpl24;Rpl26;Uba52;Rpl28;Rpl21;Rplp0;Rpl23a;Fau	Q9Y3U8;P23396;P32969;P62917;P62081;P62280;P18621;Q8TD47;P62891;P42766;P62750;P62277;P50914;P40429;P62910;P62899;P46783;P83731;P62979;P62913;P46782;P26373;Q96L21;P18077;Q96EH5;P84098;P62244;P62861;P61254;Q02543;P62987;P62888;P62701;P61313;P62269;P62841;P27635;P46776;P05388;P46779;P62424;Q9UNX3;P46778;P61513;P49207	Tardbp	P18847	R-HSA-9633008;R-HSA-9633742;R-HSA-9634669;R-HSA-1791173;R-HSA-9633005
R-HSA-2408557	Selenocysteine synthesis	45	112	0	3	0.00734908	1.11e-16	5.22e-15	2	7	0.000495	9606	Homo sapiens	Rps15;Rps18;Rps15a;Rpl18a;Rpl13;Rpl35;Rpl14;Rpl36;Rpl15;Rpl17;Rpl39;Rps10;Rpl8;Rps11;Rpl9;Rpl19;Rps13;Ubb;Rpl10;Rpl32;Rpl11;Rpl34;Rps3;Rps4x;Rps7;Rps5;Rpl37a;Rpl24;Rpl26;Uba52;Rpl28;Rpl21;Rplp0;Rpl23a;Fau				R-HSA-2408529;R-HSA-5333615
R-HSA-9711097	Cellular response to starvation	45	176	1	203	0.0115486	1.11e-16	5.22e-15	5	28	0.00197866	9606	Homo sapiens	Rps15;Rps18;Rps15a;Rpl18a;Rpl13;Rpl35;Rpl14;Rpl36;Rpl15;Rpl17;Rpl39;Rps10;Rpl8;Rps11;Rpl9;Rpl19;Rps13;Ubb;Rpl10;Rpl32;Rpl11;Rpl34;Rps3;Rps4x;Rps7;Rps5;Rpl37a;Rpl24;Rpl26;Uba52;Rpl28;Rpl21;Rplp0;Rpl23a;Fau	Q9Y3U8;P23396;P32969;P62917;P62081;P62280;P18621;Q8TD47;P62891;P42766;P62750;P62277;P50914;P40429;P62910;P62899;P46783;P83731;P62979;P62913;P46782;P26373;Q96L21;P18077;Q96EH5;P84098;P62244;P62861;P61254;Q02543;P62987;P62888;P62701;P61313;P62269;P62841;P27635;P46776;P05388;P46779;P62424;Q9UNX3;P46778;P61513;P49207	Tardbp	P18847	R-HSA-9633008;R-HSA-9633742;R-HSA-9634669;R-HSA-1791173;R-HSA-9633005
R-HSA-2408522	Selenoamino acid metabolism	45	180	0	10	0.011811	1.11e-16	5.22e-15	2	33	0.00233199	9606	Homo sapiens	Rps15;Rps18;Rps15a;Rpl18a;Rpl13;Rpl35;Rpl14;Rpl36;Rpl15;Rpl17;Rpl39;Rps10;Rpl8;Rps11;Rpl9;Rpl19;Rps13;Ubb;Rpl10;Rpl32;Rpl11;Rpl34;Rps3;Rps4x;Rps7;Rps5;Rpl37a;Rpl24;Rpl26;Uba52;Rpl28;Rpl21;Rplp0;Rpl23a;Fau				R-HSA-2408529;R-HSA-5333615
R-HSA-72695	Formation of the ternary complex, and subsequently, the 43S complex	14	54	0	0	0.00354331	6.66e-16	3.06e-14	1	3	0.000212	9606	Homo sapiens	Rps15;Rps4x;Rps15a;Rps7;Rps18;Rps5;Uba52;Rps10;Rps11;Eif3a;Rps13;Ubb;Rps3;Fau				R-HSA-72691
R-HSA-72702	Ribosomal scanning and start codon recognition	14	64	1	10	0.00419948	2.34e-14	1.03e-12	2	2	0.000141	9606	Homo sapiens	Rps15;Rps4x;Rps15a;Rps7;Rps18;Rps5;Uba52;Rps10;Rps11;Eif3a;Rps13;Ubb;Rps3;Fau	P23396;P46782;P62081;P62280;Q8TD47;P62244;P62277;P62861;P62701;P46783;Q14152;P62979;P62269;P62841	Eif3a	P47813	R-HSA-72697;R-HSA-72621
R-HSA-9754678	SARS-CoV-2 modulates host translation machinery	13	62	0	0	0.00406824	1.11e-13	4.68e-12	1	6	0.000424	9606	Homo sapiens	Rps15;Rps4x;Rps15a;Rps7;Rps18;Rps5;Uba52;Rps10;Rps11;Rps13;Ubb;Rps3;Fau				R-HSA-9729849
R-HSA-72649	Translation initiation complex formation	15	62	2	41	0.00406824	1.42e-13	5.84e-12	2	2	0.000141	9606	Homo sapiens	Rps15;Rps4x;Rps15a;Rps7;Rps18;Pabpc1;Rps5;Uba52;Rps10;Rps11;Eif3a;Rps13;Ubb;Rps3;Fau	P23396;P46782;P11940;P62081;P62280;Q8TD47;P62244;P62277;P62861;P62701;P46783;Q14152;P62979;P62269;P62841	Eif3a;Pcbp1	P11940;P47813	R-HSA-156808;R-HSA-157849
R-HSA-9735869	SARS-CoV-1 modulates host translation machinery	13	41	3	42	0.00269029	3.55e-12	1.42e-10	2	3	0.000212	9606	Homo sapiens	Rps15;Rps4x;Rps15a;Rps7;Rps18;Rps5;Uba52;Rps10;Rps11;Rps13;Ubb;Rps3;Fau	P23396;P46782;P62081;P62280;Q8TD47;P62244;P62277;P62861;P62701;P46783;P62979;P62269;P62841	Hnrnpa2b1;Hnrnph1;Sfpq	P09651	R-HSA-9729232;R-HSA-9727869
R-HSA-72662	Activation of the mRNA upon binding of the cap-binding complex and eIFs, and subsequent binding to 43S	15	66	4	97	0.00433071	5.11e-11	1.94e-09	5	6	0.000424	9606	Homo sapiens	Rps15;Rps4x;Rps15a;Rps7;Rps18;Pabpc1;Rps5;Uba52;Rps10;Rps11;Eif3a;Rps13;Ubb;Rps3;Fau	P23396;P46782;P11940;P62081;P62280;Q8TD47;P62244;P62277;P62861;P62701;P46783;Q14152;P62979;P62269;P62841	Eif3a;Pabpc1;Pcbp1;Eif3a	Q04637;P11940;P23588;P47813;P06730	R-HSA-72631;R-HSA-72647;R-HSA-156808;R-HSA-157849;R-HSA-72622
R-HSA-422475	Axon guidance	53	585	19	1688	0.0383858	2.55e-10	9.44e-09	40	298	0.0210586	9606	Homo sapiens	Rps15;Rps18;Rps15a;Pabpc1;Rpl18a;Rpl13;Rpl35;Rpl14;Rpl36;Rpl15;Csnk2a1;Rpl17;Rpl39;Rps10;Rpl8;Rps11;Rpl9;Rpl19;Hsp90aa1;Rps13;Ubb;Rpl10;Rpl32;Rpl11;Rpl34;Rps3;Psmb8;Ptprc;Rps4x;Rps7;Rps5;Rpl37a;Rpl24;Rpl26;Uba52;Rpl28;Hspa8;Rpl21;Rplp0;Rpl23a;Elob;Fau	P0CG47;Q9Y3U8;P23396;P07900;P62917;P62081;P62280;Q8TD47;P62750;P62277;P62910;P46783;P83731;P62913;P46782;P84098;P62244;P11142;P62888;P08575;P61313;P62841;P27635;P46776;P05388;P46779;Q9UNX3;P46778;P61513;P49207;P32969;P28062;P11940;P18621;P62891;P42766;P50914;P40429;P62899;P62979;P26373;Q96L21;P18077;Q96EH5;P62861;P68400;Q15370;P61254;Q02543;P62987;P62701;P62269;P62424	Mif;Hnrnph1;Ptprc;Pcbp1;Pabpc1;Eif3a;Dazap2;Csnk2a1;Pfdn5;Grk2;Rpl10;Mkln1;Hsp90aa1;Hspa8;Rpl28;Itgal;Ubb;Fth1;Gapdh	P00533;Q9Y2X7;P06241;Q13153;P43146;P49841;Q96S59;P08575;Q04637;P13591;O75553;P11940;P12931;O00560;P11142	R-HSA-8855237;R-HSA-374663;R-HSA-391872;R-HSA-8855232;R-HSA-399951;R-HSA-373711;R-HSA-445069;R-HSA-373707;R-HSA-9011289;R-HSA-374673;R-HSA-373713;R-HSA-445072;R-HSA-373715;R-HSA-451345;R-HSA-445087;R-HSA-9014610;R-HSA-374681;R-HSA-3928614;R-HSA-9011241;R-HSA-375149;R-HSA-375148;R-HSA-3928594;R-HSA-8986083;R-HSA-375151;R-HSA-9011300;R-HSA-418859;R-HSA-4093329;R-HSA-373738;R-HSA-422454;R-HSA-375157…
R-HSA-8953854	Metabolism of RNA	61	829	23	2129	0.0543963	3e-10	1.08e-08	63	189	0.0133559	9606	Homo sapiens	mt-Nd4;Rps15;Rps18;Rps15a;Pabpc1;mt-Co1;Rpl35;Rpl36;Rpl39;Rps10;Rpl8;Rps11;Rpl9;Rps13;Rpl32;Rpl34;Hnrnpa2b1;Ppia;Rps7;Pcbp1;Snrnp70;Rpl37a;Rps5;Rpl24;Rpl26;Uba52;Rpl28;mt-Atp6;Cnot6l;Rpl21;Rplp0;Rpl18a;Rpl13;Rpl14;Rpl15;Rpl17;Rpl19;Ubb;Rpl10;Rpl11;Rps3;Psmb8;Rps4x;Hspa8;Hnrnph1;mt-Co2;mt-Co3;Fau;Rpl23a	P0CG47;Q9Y3U8;P23396;P62917;P62081;P62280;Q8TD47;P62277;P62750;P62910;P46783;P83731;P62913;Q96LI5;P55795;P46782;P22626;P62244;P11142;P84098;P62888;P61313;P62841;P27635;P46776;P05388;P46779;P61513;Q9UNX3;P46778;P49207;ENST00000361624;P32969;P28062;P11940;Q9UNP9;P18621;P62891;P42766;P50914;ENST00000361381;P40429;P62899;ENST00000362079;P62979;Q15365;P08621;ENST00000361899;P31943;P26373;ENST000003617…	Rpl9;Rps15a;Tpt1;Pcbp1;Pabpc1;Eif3a;Ppia;Csnk2a1;Pfdn5;Rps13;Eif4g2;Psmb8;Eif3a;Ubtf;Hsp90aa1;Rps3;Ankrd44;Snrnp70;Fth1;Arfgef1;Rbm3;Pabpc1;Tardbp	Q13427;P31749;Q92900;Q8NAV1;Q14498;P31946;P23588;P62304;P62306;Q9H0D6;P19338;Q969Y2;Q9UQ35;O00425;P78563;Q9UJV9;P62316;Q07955;P62318;Q96GA3;Q9Y2W2;P84103;P06730;Q99633;P62314;P61247;P04792;P63104;Q01105;Q04637;Q9H074;P17844;Q8N5F7;P14678;P11940;Q9UBB9;P55265;Q09161;Q15717;Q86U42;Q9Y6M1;P11142;O00267	R-HSA-9770132;R-HSA-428293;R-HSA-111237;R-HSA-9770129;R-HSA-429955;R-HSA-9770131;R-HSA-111238;R-HSA-9770141;R-HSA-8941312;R-HSA-9770142;R-HSA-77073;R-HSA-450580;R-HSA-77587;R-HSA-9770119;R-HSA-77591;R-HSA-158484;R-HSA-77593;R-HSA-6790906;R-HSA-927889;R-HSA-927789;R-HSA-77090;R-HSA-450466;R-HSA-72231;R-HSA-72103;R-HSA-77094;R-HSA-9772351;R-HSA-191790;R-HSA-6787403;R-HSA-517674;R-HSA-429992;R-HSA-9…
R-HSA-9675108	Nervous system development	53	621	20	1839	0.040748	4.65e-09	1.63e-07	48	324	0.0228959	9606	Homo sapiens	Rps15;Rps18;Rps15a;Pabpc1;Rpl18a;Rpl13;Rpl35;Rpl14;Rpl36;Rpl15;Csnk2a1;Rpl17;Rpl39;Rps10;Rpl8;Rps11;Rpl9;Rpl19;Hsp90aa1;Rps13;Ubb;Rpl10;Rpl32;Rpl11;Rpl34;Rps3;Psmb8;Ptprc;Rps4x;Rps7;Rps5;Rpl37a;Rpl24;Rpl26;Uba52;Rpl28;Hspa8;Rpl21;Rplp0;Rpl23a;Elob;Fau	P0CG47;Q9Y3U8;P23396;P07900;P62917;P62081;P62280;Q8TD47;P62750;P62277;P62910;P46783;P83731;P62913;P46782;P84098;P62244;P11142;P62888;P08575;P61313;P62841;P27635;P46776;P05388;P46779;Q9UNX3;P46778;P61513;P49207;P32969;P28062;P11940;P18621;P62891;P42766;P50914;P40429;P62899;P62979;P26373;Q96L21;P18077;Q96EH5;P62861;P68400;Q15370;P61254;Q02543;P62987;P62701;P62269;P62424	Mif;Hnrnph1;Ptprc;Pcbp1;Pabpc1;Eif3a;Ppia;Dazap2;Csnk2a1;Pfdn5;Grk2;Rpl10;Mkln1;Hsp90aa1;Hspa8;Rpl28;Itgal;Ubb;Fth1;Gapdh	P00533;Q9Y2X7;P06241;Q13153;P43146;P49841;Q96S59;P08575;Q04637;P13591;O75553;P11940;P12931;P56693;O00560;P11142	R-HSA-374663;R-HSA-9613648;R-HSA-8855237;R-HSA-9615638;R-HSA-391872;R-HSA-8855232;R-HSA-399951;R-HSA-373711;R-HSA-445069;R-HSA-373707;R-HSA-9011289;R-HSA-374673;R-HSA-9614790;R-HSA-373713;R-HSA-445072;R-HSA-373715;R-HSA-451345;R-HSA-445087;R-HSA-9613768;R-HSA-9014610;R-HSA-9619657;R-HSA-374681;R-HSA-3928614;R-HSA-9011241;R-HSA-9616116;R-HSA-375149;R-HSA-3928594;R-HSA-375148;R-HSA-8986083;R-HSA-37…
R-HSA-6798695	Neutrophil degranulation	16	480	0	0	0.0314961	2.82e-05	0.000957	8	10	0.000707	9606	Homo sapiens	Ptprc;Mif;Tmem30a;Hsp90aa1;Hspa8;Psap;Fth1;Nfkb1;B2m;Itgal;S100a9;Camp;Ppia;S100a8				R-HSA-6798743;R-HSA-6799350;R-HSA-6798739;R-HSA-6800434;R-HSA-6798751;R-HSA-6798749;R-HSA-6798748;R-HSA-6798745
R-HSA-9706377	FLT3 signaling by CBL mutants	3	7	0	0	0.000459	5.16e-05	0.00170183	1	1	7.07e-05	9606	Homo sapiens	Ubb;Uba52				R-HSA-9706356
R-HSA-2262752	Cellular responses to stress	58	1009	23	2818	0.0662073	6.73e-05	0.00215401	120	450	0.0317999	9606	Homo sapiens	Rps15;Rps18;Rps15a;Rpl18a;Dnaja1;mt-Co1;Rpl13;Rpl35;Rpl14;Rpl36;Rpl15;Csnk2a1;Rpl17;Rpl39;Rps10;Rpl8;Rps11;Rpl9;Rpl19;Hsp90aa1;Rps13;Ubb;Rpl10;Rpl32;Rpl11;Rpl34;Rps3;Nfkb1;Psmb8;Rps4x;Rps7;H3f3a;Rps5;Rpl37a;Rpl24;Rpl26;Uba52;Rpl28;Hspa8;Rpl21;Rplp0;mt-Co2;mt-Co3;Rpl23a;Elob;Fau	P0CG47;Q9Y3U8;P00395;P23396;P07900;P62917;P62081;P62280;Q8TD47;P62750;P62277;P62910;P46783;P83731;P62913;P31689;P46782;P84098;P62244;P11142;P62888;P00414;P61313;P62841;P27635;P46776;P05388;P46779;Q9UNX3;P46778;P61513;P49207;P32969;P28062;P18621;P62891;P42766;P84243;P50914;P40429;P62899;P00403;P62979;P26373;Q96L21;P18077;Q96EH5;ENSG00000170315;P62861;P68400;Q15370;P61254;P19838;Q02543;P62987;P6270…	Ogt;Tmsb10;Rps15a;Clec2d;Il2ra;Map4k2;Ppia;Dazap2;Csnk2a1;H3f3a;Psmb8;Trip12;Hspd1;Rps4x;Ubtf;Hsp90aa1;Ankrd44;Hspa8;Emp3;Elob;Nfkb1;Gapdh;Tardbp	Q13501;P05412;Q09028;P02545;Q96EB6;Q9Y294;P31948;Q15185;P38398;O76024;P14921;O75376;P18847;P17096;Q9P0U4;Q9NUX5;Q15910;O94888;O75807;Q16665;Q8N726;P01106;Q96BA8;Q13451;P49841;Q9H2G4;P10599;P54198;Q02790	R-HSA-3790137;R-HSA-5324632;R-HSA-9726621;R-HSA-9725855;R-HSA-3790130;R-HSA-1368069;R-HSA-3371554;R-HSA-1234179;R-HSA-1234177;R-HSA-1234183;R-HSA-9653893;R-HSA-1234181;R-HSA-5324617;R-HSA-9758088;R-HSA-9759157;R-HSA-9759158;R-HSA-3371537;R-HSA-5251955;R-HSA-1368119;R-HSA-9759154;R-HSA-5251959;R-HSA-3200023;R-HSA-9725885;R-HSA-3341343;R-HSA-9690534;R-HSA-5251942;R-HSA-9755304;R-HSA-9755306;R-HSA-1…
R-HSA-8953897	Cellular responses to stimuli	58	1027	24	2845	0.0673885	9.33e-05	0.00289283	123	481	0.0339905	9606	Homo sapiens	Rps15;Rps18;Rps15a;Rpl18a;Dnaja1;mt-Co1;Rpl13;Rpl35;Rpl14;Rpl36;Rpl15;Csnk2a1;Rpl17;Rpl39;Rps10;Rpl8;Rps11;Rpl9;Rpl19;Hsp90aa1;Rps13;Ubb;Rpl10;Rpl32;Rpl11;Rpl34;Rps3;Nfkb1;Psmb8;Rps4x;Rps7;H3f3a;Rps5;Rpl37a;Rpl24;Rpl26;Uba52;Rpl28;Hspa8;Rpl21;Rplp0;mt-Co2;mt-Co3;Rpl23a;Elob;Fau	P0CG47;Q9Y3U8;P00395;P23396;P07900;P62917;P62081;P62280;Q8TD47;P62750;P62277;P62910;P46783;P83731;P62913;P31689;P46782;P84098;P62244;P11142;P62888;P00414;P61313;P62841;P27635;P46776;P05388;P46779;Q9UNX3;P46778;P61513;P49207;P32969;P28062;P18621;P62891;P42766;P84243;P50914;P40429;P62899;P00403;P62979;P26373;Q96L21;P18077;Q96EH5;ENSG00000170315;P62861;P68400;Q15370;P61254;P19838;Q02543;P62987;P6270…	Ogt;Tmsb10;Rps15a;Clec2d;Il2ra;Map4k2;Mat2a;Ppia;Dazap2;Csnk2a1;H3f3a;Psmb8;Trip12;Hspd1;Rps4x;Ubtf;Hsp90aa1;Ankrd44;Hspa8;Emp3;Elob;Nfkb1;Gapdh;Tardbp	Q13501;P05412;Q09028;P02545;Q96EB6;Q9Y294;P31948;Q15185;P38398;O76024;P14921;O75376;P18847;P17096;Q9P0U4;Q9NUX5;Q15910;O94888;P02795;O75807;Q16665;Q8N726;P01106;Q96BA8;Q13451;P49841;Q9H2G4;P10599;P54198;Q02790	R-HSA-3790137;R-HSA-5324632;R-HSA-9726621;R-HSA-9725855;R-HSA-3790130;R-HSA-1368069;R-HSA-3371554;R-HSA-1234179;R-HSA-1234177;R-HSA-1234183;R-HSA-9653893;R-HSA-1234181;R-HSA-5324617;R-HSA-9758088;R-HSA-9759157;R-HSA-9759158;R-HSA-3371537;R-HSA-5251955;R-HSA-1368119;R-HSA-9759154;R-HSA-5251959;R-HSA-3200023;R-HSA-9725885;R-HSA-3341343;R-HSA-9690534;R-HSA-5251942;R-HSA-9755304;R-HSA-9755306;R-HSA-1…
R-HSA-6785470	tRNA processing in the mitochondrion	5	45	0	0	0.00295276	9.61e-05	0.00298046	1	3	0.000212	9606	Homo sapiens	mt-Nd4;mt-Co1;mt-Co2;mt-Co3;mt-Atp6				R-HSA-6785722
R-HSA-209560	NF-kB is activated and signals survival	5	15	5	37	0.000984	0.000118	0.00352816	3	4	0.000283	9606	Homo sapiens	Ubb;Nfkb1;Uba52;Nfkbia	P0CG47;P19838;P62987;P62979;P25963	Grk2;Rps3;Nfkb1;Nfkb1;Nfkbia	P25963	R-HSA-209536;R-HSA-193691;R-HSA-193705
R-HSA-3785653	Myoclonic epilepsy of Lafora	3	11	0	0	0.000722	0.000194	0.005637	1	2	0.000141	9606	Homo sapiens	Ubb;Uba52				R-HSA-3797226
R-HSA-180585	Vif-mediated degradation of APOBEC3G	5	56	0	2	0.00367454	0.000285	0.00797834	3	4	0.000283	9606	Homo sapiens	Ubb;Uba52;Elob;Psmb8				R-HSA-180603;R-HSA-180555;R-HSA-180540
R-HSA-1168372	Downstream signaling events of B Cell Receptor (BCR)	7	91	0	56	0.00597113	0.000521	0.014589	6	15	0.00106	9606	Homo sapiens	Ubb;Nfkb1;Uba52;Psmb8;Nfkbia;Ppia				R-HSA-1168640;R-HSA-1168643;R-HSA-1168642;R-HSA-2025882;R-HSA-1168633;R-HSA-1168638
R-HSA-9637628	Modulation by Mtb of host immune system	4	11	1	28	0.000722	0.000543	0.0146545	2	6	0.000424	9606	Homo sapiens	Ubb;Uba52;B2m	P0CG47;P62987;P62979;P61769	B2m	P61769	R-HSA-9637635;R-HSA-9636461
R-HSA-9683683	Maturation of protein E	3	8	0	11	0.000525	0.00081	0.0218572	1	5	0.000353	9606	Homo sapiens	Ubb;Uba52				R-HSA-9683679
R-HSA-1169091	Activation of NF-kappaB in B cells	6	72	0	47	0.00472441	0.00095	0.0247025	5	10	0.000707	9606	Homo sapiens	Ubb;Nfkb1;Uba52;Psmb8;Nfkbia				R-HSA-1168640;R-HSA-1168643;R-HSA-1168642;R-HSA-1168633;R-HSA-1168638
R-HSA-9692914	SARS-CoV-1-host interactions	19	118	9	806	0.00774278	0.00136498	0.0327711	13	48	0.00339199	9606	Homo sapiens	Rps15;Rps4x;Rps15a;Rps7;Rps18;Rps5;Uba52;Rps10;Rps11;Nfkbia;Rps13;Ubb;Rps3;Nfkb1;Fau;Ppia;Ppib	P0CG47;P23284;P23396;P62937;P46782;P62081;P62280;Q8TD47;P62244;P62277;P62861;P19838;P62987;P62701;P46783;P62979;P62269;P62841;P25963	B2m;Psmb8;Hnrnpa2b1;Hnrnph1;Pabpc1;Pcbp1;Hspa8;Ppia;Sfpq	P59595;P59596;Q13114;Q15366;Q13287;P09651	R-HSA-9729232;R-HSA-9711058;R-HSA-9685179;R-HSA-9727869;R-HSA-9685219;R-HSA-9728804;R-HSA-9731047;R-HSA-9685189;R-HSA-9685195;R-HSA-9710988;R-HSA-9685162;R-HSA-9711016;R-HSA-9731018
R-HSA-5656121	Translesion synthesis by POLI	3	20	0	3	0.00131234	0.00143585	0.0327711	3	3	0.000212	9606	Homo sapiens	Ubb;Uba52				R-HSA-5656148;R-HSA-5656158;R-HSA-5656105
R-HSA-3229121	Glycogen storage diseases	3	22	0	0	0.00144357	0.00143585	0.0327711	1	10	0.000707	9606	Homo sapiens	Ubb;Uba52				R-HSA-3797226
R-HSA-5655862	Translesion synthesis by POLK	3	21	0	3	0.00137795	0.00162886	0.0327711	3	3	0.000212	9606	Homo sapiens	Ubb;Uba52				R-HSA-5655892;R-HSA-5655965;R-HSA-5655835
R-HSA-5684264	MAP3K8 (TPL2)-dependent MAPK1/3 activation	4	18	4	40	0.0011811	0.00163856	0.0327711	8	8	0.000565	9606	Homo sapiens	Ubb;Nfkb1;Uba52	P0CG47;P19838;P62987;P62979	Nfkb1;Rps3;Nfkb1;Nfkbia	Q8NFZ5;P41279;P19838	R-HSA-5684261;R-HSA-451634;R-HSA-5684275;R-HSA-5684273;R-HSA-451649;R-HSA-5684250;R-HSA-5684267;R-HSA-5684248
R-HSA-9694493	Maturation of protein E	3	8	0	18	0.000525	0.0020618	0.0391742	1	5	0.000353	9606	Homo sapiens	Ubb;Uba52				R-HSA-9694529
R-HSA-9705683	SARS-CoV-2-host interactions	17	315	4	522	0.0206693	0.00221482	0.0420815	13	67	0.00473465	9606	Homo sapiens	Rps15;Rps4x;Rps15a;Rps7;Rps18;Rps5;Uba52;Rps10;Rps11;Hsp90aa1;Rps13;Ubb;Rps3;Fau;B2m	P0CG47;P23396;P07900;P46782;P62081;P62280;Q8TD47;P62244;P62277;P62861;P62701;P62987;P46783;P62979;P61769;P62269;P62841	Hsp90aa1;Hspa8;Psap;Gapdh	Q15750;P0DTC6;Q9UHD2	R-HSA-9705010;R-HSA-9705299;R-HSA-9709852;R-HSA-9755359;R-HSA-9729849;R-HSA-9708889;R-HSA-983426;R-HSA-9705082;R-HSA-9755328;R-HSA-168184;R-HSA-9729704;R-HSA-918224;R-HSA-9754827
R-HSA-174113	SCF-beta-TrCP mediated degradation of Emi1	4	55	0	0	0.00360892	0.00230918	0.0438743	2	3	0.000212	9606	Homo sapiens	Ubb;Uba52;Psmb8				R-HSA-174203;R-HSA-174159
R-HSA-5696397	Gap-filling DNA repair synthesis and ligation in GG-NER	3	27	0	0	0.00177165	0.00256006	0.046081	2	2	0.000141	9606	Homo sapiens	Ubb;Uba52				R-HSA-5690997;R-HSA-5691001
R-HSA-5603029	IkBA variant leads to EDA-ID	2	8	0	0	0.000525	0.00294768	0.0530582	2	2	0.000141	9606	Homo sapiens	Nfkb1;Nfkbia				R-HSA-5228811;R-HSA-9630921
R-HSA-5686938	Regulation of TLR by endogenous ligand	4	36	0	25	0.00236221	0.00314821	0.0566678	3	12	0.000848	9606	Homo sapiens	Psap;S100a9;S100a8				R-HSA-5432849;R-HSA-5432852;R-HSA-5432814
R-HSA-8868766	rRNA processing in the mitochondrion	5	40	0	61	0.00262467	0.00337024	0.0600984	1	6	0.000424	9606	Homo sapiens	mt-Nd4;mt-Co1;mt-Co2;mt-Co3;mt-Atp6				R-HSA-6785722
R-HSA-162588	Budding and maturation of HIV virion	4	37	1	29	0.00242782	0.0035352	0.0600984	3	4	0.000283	9606	Homo sapiens	Ubb;Uba52;Ppia	P0CG47;P62937;P62987;P62979	Dazap2	Q96PU5	R-HSA-3159232;R-HSA-3159227;R-HSA-3139027
R-HSA-2979096	NOTCH2 Activation and Transmission of Signal to the Nucleus	3	23	0	8	0.00150919	0.00376465	0.0632528	2	11	0.000777	9606	Homo sapiens	Ubb;Uba52				R-HSA-2172172;R-HSA-157629
R-HSA-3322077	Glycogen synthesis	3	24	0	11	0.0015748	0.00376465	0.0632528	2	22	0.00155466	9606	Homo sapiens	Ubb;Uba52				R-HSA-3781009;R-HSA-3780995
R-HSA-174084	Autodegradation of Cdh1 by Cdh1:APC/C	4	64	0	0	0.00419948	0.0039533	0.0632528	2	2	0.000141	9606	Homo sapiens	Ubb;Uba52;Psmb8				R-HSA-174058;R-HSA-174057
R-HSA-5362768	Hh mutants are degraded by ERAD	4	61	0	3	0.00400263	0.0039533	0.0632528	2	6	0.000424	9606	Homo sapiens	Ubb;Uba52;Psmb8				R-HSA-5387392;R-HSA-5483238
R-HSA-174490	Membrane binding and targetting of GAG proteins	3	17	0	15	0.00111549	0.00411116	0.0657785	3	4	0.000283	9606	Homo sapiens	Ubb;Uba52				R-HSA-184323;R-HSA-3149434;R-HSA-184269
R-HSA-2173791	TGF-beta receptor signaling in EMT (epithelial to mesenchymal transition)	3	19	0	14	0.00124672	0.00411116	0.0657785	2	6	0.000424	9606	Homo sapiens	Ubb;Uba52				R-HSA-2160931;R-HSA-2160935
R-HSA-6782210	Gap-filling DNA repair synthesis and ligation in TC-NER	4	66	0	0	0.00433071	0.00440365	0.0671464	2	2	0.000141	9606	Homo sapiens	Ubb;Uba52;Ppia				R-HSA-6782227;R-HSA-6782208
R-HSA-174495	Synthesis And Processing Of GAG, GAGPOL Polyproteins	3	18	0	15	0.0011811	0.00447643	0.0671464	3	5	0.000353	9606	Homo sapiens	Ubb;Uba52				R-HSA-184323;R-HSA-3149434;R-HSA-184269
R-HSA-901032	ER Quality Control Compartment (ERQC)	3	33	0	0	0.00216535	0.00447643	0.0671464	2	9	0.000636	9606	Homo sapiens	Ubb;Uba52				R-HSA-1022127;R-HSA-8867288
R-HSA-9708530	Regulation of BACH1 activity	3	20	0	15	0.00131234	0.00447643	0.0671464	1	8	0.000565	9606	Homo sapiens	Ubb;Uba52				R-HSA-9708517
R-HSA-179409	APC-Cdc20 mediated degradation of Nek2A	3	26	0	11	0.00170604	0.00486075	0.0729113	2	3	0.000212	9606	Homo sapiens	Ubb;Uba52				R-HSA-179417;R-HSA-179421
R-HSA-5387390	Hh mutants abrogate ligand secretion	4	64	0	4	0.00419948	0.00488736	0.0733104	2	7	0.000495	9606	Homo sapiens	Ubb;Uba52;Psmb8				R-HSA-5387392;R-HSA-5483238
R-HSA-4641263	Regulation of FZD by ubiquitination	3	22	0	13	0.00144357	0.00526441	0.0737018	3	6	0.000424	9606	Homo sapiens	Ubb;Uba52				R-HSA-4641236;R-HSA-4641253;R-HSA-4641246
R-HSA-4641257	Degradation of AXIN	4	57	1	17	0.00374016	0.00567784	0.0794897	5	8	0.000565	9606	Homo sapiens	Ubb;Uba52;Psmb8	P0CG47;P28062;P62987;P62979	Ubb	Q9HAU4	R-HSA-4641134;R-HSA-3640861;R-HSA-3640874;R-HSA-4641256;R-HSA-4641129
R-HSA-1266738	Developmental Biology	57	1304	30	3259	0.0855643	0.00575211	0.0805295	108	594	0.0419758	9606	Homo sapiens	Rps15;Rps18;Rps15a;Pabpc1;Rpl18a;Rpl13;Rpl35;Rpl14;Rpl36;Rpl15;Csnk2a1;Rpl17;Rpl39;Rps10;Rpl8;Rps11;Rpl9;Rpl19;Hsp90aa1;Rps13;Ubb;Rpl10;Rpl32;Rpl11;Rpl34;Rps3;Nfkb1;Psmb8;Ptprc;Rps4x;Rps7;H3f3a;Rps5;Rpl37a;Rpl24;Rpl26;Uba52;Mif;Rpl28;Hspa8;Rpl21;Rplp0;Rpl23a;Elob;Fau	P0CG47;Q9Y3U8;P23396;P07900;P62917;P62081;P62280;Q8TD47;P62750;P62277;P62910;P46783;P83731;P62913;P46782;ENSG00000104899;P84098;P62244;P11142;P62888;P08575;P61313;P62841;P27635;P46776;P05388;P46779;Q9UNX3;P46778;P61513;P49207;P32969;P28062;P11940;P18621;P62891;P42766;P84243;P50914;P40429;P62899;P62979;P03971;P26373;Q96L21;P18077;Q96EH5;P62861;P68400;Q15370;P61254;P19838;Q02543;P62987;P62701;P6226…	Ptprc;Clec2d;Nfkb1;Pcbp1;Pabpc1;Sfpq;Pfdn5;Grk2;Ubtf;Hspa8;Itgal;Fth1;Ppib;Gapdh;Mif;Hnrnph1;Eif3a;Ppia;Ppia;Csnk2a1;Dazap2;Rpl10;Trip12;Hspd1;Mkln1;Hsp90aa1;Rpl28;Ubb;Nfkb1;Tardbp	P05412;Q15788;O95863;Q9Y2X7;P06241;P09017;Q96S59;O95947;O75593;P13591;O75376;O75553;Q15848;P35222;P35659;P11802;P00533;P01106;Q13153;Q9Y2W1;O60271;P43146;P49841;P26367;P08575;Q04637;P11940;P12931;P56693;O00560;P11142	R-HSA-5617492;R-HSA-9796225;R-HSA-451345;R-HSA-5617484;R-HSA-5617486;R-HSA-3928614;R-HSA-9634445;R-HSA-5617483;R-HSA-3928594;R-HSA-418859;R-HSA-422454;R-HSA-376117;R-HSA-392752;R-HSA-419644;R-HSA-419645;R-HSA-1183058;R-HSA-5617431;R-HSA-8855237;R-HSA-5621010;R-HSA-8855232;R-HSA-6810159;R-HSA-6810158;R-HSA-399951;R-HSA-211272;R-HSA-9614790;R-HSA-6810161;R-HSA-5617676;R-HSA-9613768;R-HSA-211289;R-H…
R-HSA-5658442	Regulation of RAS by GAPs	4	71	0	3	0.00465879	0.00595917	0.0834283	2	5	0.000353	9606	Homo sapiens	Ubb;Uba52;Psmb8				R-HSA-5658430;R-HSA-5658424
R-HSA-1234176	Oxygen-dependent proline hydroxylation of Hypoxia-inducible Factor Alpha	5	72	1	52	0.00472441	0.00602522	0.084353	10	12	0.000848	9606	Homo sapiens	Ubb;Uba52;Elob;Psmb8	P0CG47;Q15370;P28062;P62987;P62979	Elob	Q16665	R-HSA-1234163;R-HSA-1234179;R-HSA-1234177;R-HSA-1234183;R-HSA-1234181;R-HSA-1234169;R-HSA-1234175;R-HSA-1234159;R-HSA-1234172;R-HSA-1234173
R-HSA-174154	APC/C:Cdc20 mediated degradation of Securin	4	68	0	5	0.00446194	0.00624962	0.0851414	2	3	0.000212	9606	Homo sapiens	Ubb;Uba52;Psmb8				R-HSA-174144;R-HSA-174202
R-HSA-211733	Regulation of activated PAK-2p34 by proteasome mediated degradation	4	50	0	25	0.00328084	0.00654934	0.0851414	2	2	0.000141	9606	Homo sapiens	Ubb;Uba52;Psmb8				R-HSA-211715;R-HSA-211734
R-HSA-8875360	InlB-mediated entry of Listeria monocytogenes into host cell	3	19	0	23	0.00124672	0.00707734	0.0920054	3	8	0.000565	9606	Homo sapiens	Ubb;Uba52				R-HSA-8876262;R-HSA-8876258;R-HSA-8876255
R-HSA-68949	Orc1 removal from chromatin	4	73	0	10	0.00479003	0.00750523	0.097568	2	4	0.000283	9606	Homo sapiens	Ubb;Uba52;Psmb8				R-HSA-68946;R-HSA-68948
R-HSA-110314	Recognition of DNA damage by PCNA-containing replication complex	3	30	0	12	0.0019685	0.00758128	0.0985566	3	6	0.000424	9606	Homo sapiens	Ubb;Uba52				R-HSA-5655466;R-HSA-5655481;R-HSA-5652009
R-HSA-168927	TICAM1, RIP1-mediated IKK complex recruitment	3	19	0	26	0.00124672	0.00758128	0.0985566	1	3	0.000212	9606	Homo sapiens	Ubb;Uba52				R-HSA-9014342
R-HSA-69017	CDK-mediated phosphorylation and removal of Cdc6	4	75	0	5	0.00492126	0.00854874	0.102585	2	4	0.000283	9606	Homo sapiens	Ubb;Uba52;Psmb8				R-HSA-69015;R-HSA-69016
R-HSA-2691230	Signaling by NOTCH1 HD Domain Mutants in Cancer	3	16	0	30	0.00104987	0.00980577	0.117669	2	6	0.000424	9606	Homo sapiens	Ubb;Uba52				R-HSA-2730752;R-HSA-2737728
R-HSA-2691232	Constitutive Signaling by NOTCH1 HD Domain Mutants	3	16	0	30	0.00104987	0.00980577	0.117669	2	6	0.000424	9606	Homo sapiens	Ubb;Uba52				R-HSA-2730752;R-HSA-2737728
R-HSA-5687868	Defective SFTPA2 causes IPF	1	1	0	0	6.56e-05	0.00982445	0.117893	1	1	7.07e-05	9606	Homo sapiens	Psap				R-HSA-5687875
R-HSA-937041	IKK complex recruitment mediated by RIP1	3	24	0	26	0.0015748	0.0104149	0.123165	1	3	0.000212	9606	Homo sapiens	Ubb;Uba52				R-HSA-168915
R-HSA-6782135	Dual incision in TC-NER	4	68	0	23	0.00446194	0.0109106	0.123165	7	7	0.000495	9606	Homo sapiens	Ubb;Uba52;Ppia				R-HSA-6782211;R-HSA-6782131;R-HSA-9684118;R-HSA-6782224;R-HSA-6782141;R-HSA-6782204;R-HSA-6782138
R-HSA-169911	Regulation of Apoptosis	4	54	0	33	0.00354331	0.0109106	0.123165	2	5	0.000353	9606	Homo sapiens	Ubb;Uba52;Psmb8				R-HSA-211715;R-HSA-211734
R-HSA-937039	IRAK1 recruits IKK complex	2	16	0	0	0.00104987	0.0111968	0.123165	1	4	0.000283	9606	Homo sapiens	Ubb;Uba52				R-HSA-937050
R-HSA-975144	IRAK1 recruits IKK complex upon TLR7/8 or 9 stimulation	2	16	0	0	0.00104987	0.0111968	0.123165	1	4	0.000283	9606	Homo sapiens	Ubb;Uba52				R-HSA-975122
R-HSA-3371568	Attenuation phase	3	47	0	0	0.00308399	0.0116978	0.128676	4	5	0.000353	9606	Homo sapiens	Hspa8;Ubb;Hsp90aa1				R-HSA-3371554;R-HSA-5324617;R-HSA-5082369;R-HSA-5082384
R-HSA-349425	Autodegradation of the E3 ubiquitin ligase COP1	4	54	0	35	0.00354331	0.0117824	0.129606	2	5	0.000353	9606	Homo sapiens	Ubb;Uba52;Psmb8				R-HSA-264444;R-HSA-264458
R-HSA-2559582	Senescence-Associated Secretory Phenotype (SASP)	5	91	0	49	0.00597113	0.0125251	0.137776	7	22	0.00155466	9606	Homo sapiens	Ubb;H3f3a;Nfkb1;Uba52				R-HSA-3788745;R-HSA-3790137;R-HSA-3857305;R-HSA-3788748;R-HSA-3857308;R-HSA-3790130;R-HSA-3788724
R-HSA-1358803	Downregulation of ERBB2:ERBB3 signaling	3	16	0	35	0.00104987	0.0137855	0.137855	5	8	0.000565	9606	Homo sapiens	Ubb;Uba52				R-HSA-1358789;R-HSA-1358790;R-HSA-1358797;R-HSA-1358792;R-HSA-1358795
R-HSA-901042	Calnexin/calreticulin cycle	3	41	0	10	0.00269029	0.0137855	0.137855	2	13	0.000919	9606	Homo sapiens	Ubb;Uba52				R-HSA-1022127;R-HSA-8867288
R-HSA-69613	p53-Independent G1/S DNA damage checkpoint	4	54	3	41	0.00354331	0.0141537	0.141537	3	4	0.000283	9606	Homo sapiens	Ubb;Uba52;Psmb8	P0CG47;P28062;P62987;P62979	Ppp2r5c;Ppp2r5c;Ppp2r5c	O96017	R-HSA-69600;R-HSA-69608;R-HSA-69598
R-HSA-69601	Ubiquitin Mediated Degradation of Phosphorylated Cdc25A	4	54	3	41	0.00354331	0.0141537	0.141537	3	4	0.000283	9606	Homo sapiens	Ubb;Uba52;Psmb8	P0CG47;P28062;P62987;P62979	Ppp2r5c;Ppp2r5c;Ppp2r5c	O96017	R-HSA-69600;R-HSA-69608;R-HSA-69598
R-HSA-69610	p53-Independent DNA Damage Response	4	54	3	41	0.00354331	0.0141537	0.141537	3	4	0.000283	9606	Homo sapiens	Ubb;Uba52;Psmb8	P0CG47;P28062;P62987;P62979	Ppp2r5c;Ppp2r5c;Ppp2r5c	O96017	R-HSA-69600;R-HSA-69608;R-HSA-69598
R-HSA-5683826	Surfactant metabolism	4	52	1	45	0.00341207	0.0151808	0.151808	8	29	0.00204932	9606	Homo sapiens	Psap	Q8IWL1;ENSG00000185303;Q8IWL2;ENSG00000122852	Psap	Q9UGM3	R-HSA-5686359;R-HSA-5683879;R-HSA-5687284;R-HSA-5685296;R-HSA-5685649;R-HSA-5686286;R-HSA-5686335;R-HSA-5686301
R-HSA-8949275	RUNX3 Regulates Immune Response and Cell Migration	2	10	0	9	0.000656	0.0154875	0.154875	2	5	0.000353	9606	Homo sapiens	Itgal				R-HSA-8949343;R-HSA-8949335
R-HSA-9615710	Late endosomal microautophagy	4	35	1	62	0.00229659	0.0162538	0.162538	3	3	0.000212	9606	Homo sapiens	Hspa8;Ubb;Uba52	P0CG47;P11142;P62987;P62979	Hsp90aa1	P11142	R-HSA-9631065;R-HSA-9615721;R-HSA-9631068
R-HSA-9705462	Inactivation of CSF3 (G-CSF) signaling	4	27	2	75	0.00177165	0.0162538	0.162538	2	9	0.000636	9606	Homo sapiens	Ubb;Uba52;Elob	P0CG47;Q15370;P62987;P62979	Elob;Elob	Q93034;Q15369	R-HSA-9705729;R-HSA-9705738
R-HSA-110320	Translesion Synthesis by POLH	3	24	0	32	0.0015748	0.0168778	0.167018	7	8	0.000565	9606	Homo sapiens	Ubb;Uba52				R-HSA-5655170;R-HSA-5654989;R-HSA-5654986;R-HSA-110317;R-HSA-110316;R-HSA-110319;R-HSA-5654985
R-HSA-5696394	DNA Damage Recognition in GG-NER	3	40	0	18	0.00262467	0.0168778	0.167018	3	5	0.000353	9606	Homo sapiens	Ubb;Uba52				R-HSA-6782943;R-HSA-5696655;R-HSA-5696664
R-HSA-9762114	GSK3B and BTRC:CUL1-mediated-degradation of NFE2L2	4	54	1	46	0.00354331	0.0179506	0.167018	3	4	0.000283	9606	Homo sapiens	Ubb;Uba52;Psmb8	P0CG47;P28062;P62987;P62979	Gapdh	P49841	R-HSA-9762096;R-HSA-9762094;R-HSA-9762091
R-HSA-174048	APC/C:Cdc20 mediated degradation of Cyclin B	3	24	0	33	0.0015748	0.0185576	0.167018	2	3	0.000212	9606	Homo sapiens	Ubb;Uba52				R-HSA-174227;R-HSA-174157
R-HSA-6799990	Metal sequestration by antimicrobial proteins	2	13	0	9	0.000853	0.0186782	0.168104	2	5	0.000353	9606	Homo sapiens	S100a9;S100a8				R-HSA-6798528;R-HSA-6798474
R-HSA-8866427	VLDLR internalisation and degradation	2	16	0	6	0.00104987	0.0203685	0.181123	1	4	0.000283	9606	Homo sapiens	Ubb;Uba52				R-HSA-8854628
R-HSA-174184	Cdc20:Phospho-APC/C mediated degradation of Cyclin A	4	73	0	33	0.00479003	0.0210157	0.181123	2	3	0.000212	9606	Homo sapiens	Ubb;Uba52;Psmb8				R-HSA-174104;R-HSA-174255
R-HSA-917729	Endosomal Sorting Complex Required For Transport (ESCRT)	3	35	0	28	0.00229659	0.021245	0.181123	4	4	0.000283	9606	Homo sapiens	Ubb;Uba52				R-HSA-917693;R-HSA-917700;R-HSA-917730;R-HSA-917696
R-HSA-3371571	HSF1-dependent transactivation	3	59	0	0	0.00387139	0.021245	0.181123	5	8	0.000565	9606	Homo sapiens	Hspa8;Ubb;Hsp90aa1				R-HSA-3371554;R-HSA-5324617;R-HSA-5082356;R-HSA-5082369;R-HSA-5082384
R-HSA-8982491	Glycogen metabolism	3	41	0	22	0.00269029	0.021245	0.181123	2	37	0.00261466	9606	Homo sapiens	Ubb;Uba52				R-HSA-3781009;R-HSA-3780995
R-HSA-445989	TAK1-dependent IKK and NF-kappa-B activation	5	55	4	119	0.00360892	0.0226404	0.181123	12	17	0.00120133	9606	Homo sapiens	Ubb;Nfkb1;Uba52;Nfkbia	P0CG47;P19838;P62987;P62979;P25963	Hsp90aa1;Rps3;Nfkb1;Nfkbia	Q9Y6K9;O15111;O14920	R-HSA-9749494;R-HSA-168166;R-HSA-5609665;R-HSA-9749505;R-HSA-9750226;R-HSA-9750946;R-HSA-9757954;R-HSA-9758604;R-HSA-9630923;R-HSA-9750942;R-HSA-168184;R-HSA-9773803
R-HSA-5656169	Termination of translesion DNA synthesis	3	35	1	29	0.00229659	0.0231487	0.18519	6	9	0.000636	9606	Homo sapiens	Ubb;Uba52	P0CG47;P62987;P62979	Tardbp	P41226	R-HSA-5653766;R-HSA-5653838;R-HSA-5653756;R-HSA-5653770;R-HSA-5653754;R-HSA-5655193
R-HSA-4608870	Asymmetric localization of PCP proteins	4	66	0	43	0.00433071	0.0236853	0.189482	2	7	0.000495	9606	Homo sapiens	Ubb;Uba52;Psmb8				R-HSA-4608855;R-HSA-4608852
R-HSA-9013418	RHOBTB2 GTPase cycle	2	24	0	0	0.0015748	0.0239317	0.191454	2	2	0.000141	9606	Homo sapiens	Phip;Hsp90aa1				R-HSA-9018785;R-HSA-9018787
R-HSA-5696400	Dual Incision in GG-NER	3	41	0	24	0.00269029	0.0241343	0.193074	2	3	0.000212	9606	Homo sapiens	Ubb;Uba52				R-HSA-5690213;R-HSA-5690988
R-HSA-9013973	TICAM1-dependent activation of IRF3/IRF7	3	14	1	55	0.000919	0.0272252	0.194108	3	9	0.000636	9606	Homo sapiens	Ubb;Uba52	P0CG47;P62987;P62979	Psmb8	Q13114	R-HSA-9013992;R-HSA-9013990;R-HSA-9013974
R-HSA-179419	APC:Cdc20 mediated degradation of cell cycle proteins prior to satisfation of the cell cycle checkpoint	4	74	0	44	0.00485564	0.0272994	0.194108	4	6	0.000424	9606	Homo sapiens	Ubb;Uba52;Psmb8				R-HSA-174104;R-HSA-179417;R-HSA-174255;R-HSA-179421
R-HSA-450321	JNK (c-Jun kinases) phosphorylation and activation mediated by activated human TAK1	2	26	0	0	0.00170604	0.0277297	0.194108	1	3	0.000212	9606	Homo sapiens	Ubb;Uba52				R-HSA-450337
R-HSA-110312	Translesion synthesis by REV1	3	19	1	50	0.00124672	0.0283003	0.198102	5	5	0.000353	9606	Homo sapiens	Ubb;Uba52	P0CG47;P62987;P62979	Camp	Q9UI95	R-HSA-5652151;R-HSA-110307;R-HSA-110322;R-HSA-110308;R-HSA-110311
R-HSA-5676590	NIK-->noncanonical NF-kB signaling	4	61	12	61	0.00400263	0.0296174	0.207322	5	9	0.000636	9606	Homo sapiens	Ubb;Uba52;Psmb8	P0CG47;P28062;P62987;P62979	Rpl10;Rps13;Rpl9;Rpl24;Rpl8;Hsp90aa1;Hspa8;Rps11;Rpl13;Rpl32;Rps18;Rpl14	Q99558	R-HSA-5607731;R-HSA-5668545;R-HSA-5607725;R-HSA-5607721;R-HSA-5607722
R-HSA-975110	TRAF6 mediated IRF7 activation in TLR7/8 or 9 signaling	2	17	0	11	0.00111549	0.0297135	0.207994	1	5	0.000353	9606	Homo sapiens	Ubb;Uba52				R-HSA-975118
R-HSA-450302	activated TAK1 mediates p38 MAPK activation	2	27	0	0	0.00177165	0.0297135	0.207994	1	5	0.000353	9606	Homo sapiens	Ubb;Uba52				R-HSA-450346
R-HSA-75815	Ubiquitin-dependent degradation of Cyclin D	4	54	1	65	0.00354331	0.0304152	0.212907	3	5	0.000353	9606	Homo sapiens	Ubb;Uba52;Psmb8	P0CG47;P28062;P62987;P62979	Gapdh	P49841	R-HSA-75825;R-HSA-75824;R-HSA-75820
R-HSA-176409	APC/C:Cdc20 mediated degradation of mitotic proteins	4	76	0	49	0.00498688	0.0320487	0.224341	8	13	0.000919	9606	Homo sapiens	Ubb;Uba52;Psmb8				R-HSA-174227;R-HSA-174144;R-HSA-174202;R-HSA-174104;R-HSA-179417;R-HSA-174255;R-HSA-179421;R-HSA-174157
R-HSA-983705	Signaling by the B Cell Receptor (BCR)	8	189	2	203	0.0124016	0.0336134	0.226092	21	45	0.00317999	9606	Homo sapiens	Igkc;Ubb;Nfkb1;Uba52;Psmb8;Nfkbia;Ppia	P0CG47;P19838;P62937;P01834;P62987;P28062;P62979;P25963	Hspd1;Psap	P16885;P07948	R-HSA-9606162;R-HSA-9606163;R-HSA-5690740;R-HSA-2025882;R-HSA-1168633;R-HSA-1112666;R-HSA-9691421;R-HSA-1168638;R-HSA-1168640;R-HSA-1168643;R-HSA-983709;R-HSA-1168642;R-HSA-983707;R-HSA-9606151;R-HSA-983703;R-HSA-5690702;R-HSA-983700;R-HSA-5690701;R-HSA-9606894;R-HSA-9606159;R-HSA-983696
R-HSA-5607761	Dectin-1 mediated noncanonical NF-kB signaling	4	66	12	61	0.00433071	0.0337328	0.226092	4	9	0.000636	9606	Homo sapiens	Ubb;Uba52;Psmb8	P0CG47;P28062;P62987;P62979	Rpl10;Rps13;Rpl9;Rpl24;Rpl8;Hsp90aa1;Hspa8;Rps11;Rpl13;Rpl32;Rps18;Rpl14	Q99558	R-HSA-5607731;R-HSA-5607725;R-HSA-5607721;R-HSA-5607722
R-HSA-6807004	Negative regulation of MET activity	3	25	0	51	0.00164042	0.0340092	0.226092	3	12	0.000848	9606	Homo sapiens	Ubb;Uba52				R-HSA-8875431;R-HSA-8875443;R-HSA-8875183
R-HSA-532668	N-glycan trimming in the ER and Calnexin/Calreticulin cycle	3	57	0	15	0.00374016	0.0340092	0.226092	4	18	0.00127199	9606	Homo sapiens	Ubb;Uba52				R-HSA-1022127;R-HSA-8853379;R-HSA-8850594;R-HSA-8867288
R-HSA-193639	p75NTR signals via NF-kB	5	19	6	176	0.00124672	0.037682	0.226092	5	13	0.000919	9606	Homo sapiens	Ubb;Nfkb1;Uba52;Nfkbia	P0CG47;P19838;P62987;P62979;P25963	Grk2;Rps3;Nfkb1;Dazap2;Nfkb1;Nfkbia	Q13501;P25963	R-HSA-209536;R-HSA-193691;R-HSA-193705;R-HSA-193694;R-HSA-209566
R-HSA-9665230	Drug resistance in ERBB2 KD mutants	1	4	0	0	0.000262	0.038725	0.23235	8	8	0.000565	9606	Homo sapiens	Hsp90aa1				R-HSA-9665315;R-HSA-9665232;R-HSA-9665280;R-HSA-9665286;R-HSA-9665284;R-HSA-9665304;R-HSA-9665311;R-HSA-9665278
R-HSA-9652282	Drug-mediated inhibition of ERBB2 signaling	1	4	0	0	0.000262	0.038725	0.23235	3	3	0.000212	9606	Homo sapiens	Hsp90aa1				R-HSA-9652277;R-HSA-9652264;R-HSA-9665726
R-HSA-9665247	Resistance of ERBB2 KD mutants to osimertinib	1	4	0	0	0.000262	0.038725	0.23235	1	1	7.07e-05	9606	Homo sapiens	Hsp90aa1				R-HSA-9665280
R-HSA-9665233	Resistance of ERBB2 KD mutants to trastuzumab	1	4	0	0	0.000262	0.038725	0.23235	1	1	7.07e-05	9606	Homo sapiens	Hsp90aa1				R-HSA-9665232
R-HSA-9665250	Resistance of ERBB2 KD mutants to AEE788	1	4	0	0	0.000262	0.038725	0.23235	1	1	7.07e-05	9606	Homo sapiens	Hsp90aa1				R-HSA-9665278
R-HSA-9665249	Resistance of ERBB2 KD mutants to afatinib	1	4	0	0	0.000262	0.038725	0.23235	1	1	7.07e-05	9606	Homo sapiens	Hsp90aa1				R-HSA-9665311
R-HSA-9665251	Resistance of ERBB2 KD mutants to lapatinib	1	4	0	0	0.000262	0.038725	0.23235	1	1	7.07e-05	9606	Homo sapiens	Hsp90aa1				R-HSA-9665284
R-HSA-9665244	Resistance of ERBB2 KD mutants to sapitinib	1	4	0	0	0.000262	0.038725	0.23235	1	1	7.07e-05	9606	Homo sapiens	Hsp90aa1				R-HSA-9665304
R-HSA-9665737	Drug resistance in ERBB2 TMD/JMD mutants	1	4	0	0	0.000262	0.038725	0.23235	1	1	7.07e-05	9606	Homo sapiens	Hsp90aa1				R-HSA-9665708
R-HSA-9665245	Resistance of ERBB2 KD mutants to tesevatinib	1	4	0	0	0.000262	0.038725	0.23235	1	1	7.07e-05	9606	Homo sapiens	Hsp90aa1				R-HSA-9665315
R-HSA-9665246	Resistance of ERBB2 KD mutants to neratinib	1	4	0	0	0.000262	0.038725	0.23235	1	1	7.07e-05	9606	Homo sapiens	Hsp90aa1				R-HSA-9665286
R-HSA-9678108	SARS-CoV-1 Infection	19	194	13	1101	0.0127297	0.0401948	0.241169	30	159	0.011236	9606	Homo sapiens	Rps15;Rps4x;Rps15a;Rps7;Rps18;Rps5;Uba52;Rps10;Rps11;Nfkbia;Rps13;Ubb;Rps3;Nfkb1;Fau;Ppia;Ppib	P0CG47;P23284;P23396;P62937;P46782;P62081;P62280;Q8TD47;P62244;P62277;P62861;P19838;P62987;P62701;P46783;P62979;P62269;P62841;P25963	B2m;Rpl9;Hnrnph1;Pabpc1;Pcbp1;Ppia;Sfpq;Psmb8;Hnrnpa2b1;Hspa8;Elob;Gapdh;Tardbp	P17844;P40337;P59595;P55072;P59596;Q13114;Q15366;Q13287;P49841;P09651	R-HSA-9683664;R-HSA-9729232;R-HSA-9683735;R-HSA-9683734;R-HSA-9711058;R-HSA-9683679;R-HSA-9683714;R-HSA-9685639;R-HSA-9682631;R-HSA-9683718;R-HSA-9685189;R-HSA-9685195;R-HSA-9710988;R-HSA-9731018;R-HSA-9683634;R-HSA-9685179;R-HSA-9727869;R-HSA-9684218;R-HSA-9683455;R-HSA-9685219;R-HSA-9728804;R-HSA-9731047;R-HSA-9683687;R-HSA-9683751;R-HSA-9683622;R-HSA-9686699;R-HSA-9685162;R-HSA-9711016;R-HSA-9…
R-HSA-9646399	Aggrephagy	4	47	1	88	0.00308399	0.0419403	0.251642	13	15	0.00106	9606	Homo sapiens	Ubb;Uba52;Hsp90aa1	P0CG47;P07900;P62987;P62979	Rpl9	P55072	R-HSA-9646354;R-HSA-9646679;R-HSA-9641111;R-HSA-9646390;R-HSA-9641109;R-HSA-9646685;R-HSA-9641089;R-HSA-9640480;R-HSA-9641127;R-HSA-9646347;R-HSA-9641096;R-HSA-9646383;R-HSA-9646348
R-HSA-5610780	Degradation of GLI1 by the proteasome	4	62	0	71	0.00406824	0.0429159	0.257004	3	6	0.000424	9606	Homo sapiens	Ubb;Uba52;Psmb8				R-HSA-5610742;R-HSA-5610758;R-HSA-5610760
R-HSA-937042	IRAK2 mediated activation of TAK1 complex	3	12	0	72	0.000787	0.0429239	0.257004	4	5	0.000353	9606	Homo sapiens	Ubb;Uba52				R-HSA-936942;R-HSA-936991;R-HSA-936986;R-HSA-936960
R-HSA-2871837	FCERI mediated NF-kB activation	6	175	0	104	0.0114829	0.0442589	0.257004	7	19	0.00134266	9606	Homo sapiens	Igkc;Ubb;Nfkb1;Uba52;Psmb8;Nfkbia				R-HSA-2730904;R-HSA-202534;R-HSA-5607728;R-HSA-2730894;R-HSA-5607724;R-HSA-2730882;R-HSA-202541
R-HSA-6781823	Formation of TC-NER Pre-Incision Complex	4	56	0	81	0.00367454	0.0449054	0.257004	3	7	0.000495	9606	Homo sapiens	Ubb;Uba52;Ppia				R-HSA-6782069;R-HSA-6782004;R-HSA-6781867
R-HSA-9014325	TICAM1,TRAF6-dependent induction of TAK1 complex	3	13	0	72	0.000853	0.0456651	0.257004	5	6	0.000424	9606	Homo sapiens	Ubb;Uba52				R-HSA-847070;R-HSA-450259;R-HSA-177690;R-HSA-177692;R-HSA-9628444
R-HSA-9645460	Alpha-protein kinase 1 signaling pathway	3	14	0	72	0.000919	0.0456651	0.257004	4	10	0.000707	9606	Homo sapiens	Ubb;Uba52				R-HSA-9645442;R-HSA-9645394;R-HSA-9645414;R-HSA-9645406
R-HSA-69052	Switching of origins to a post-replicative state	4	94	1	57	0.00616798	0.0459192	0.257004	5	10	0.000707	9606	Homo sapiens	Ubb;Uba52;Psmb8	P0CG47;P28062;P62987;P62979	H3f3a	P49736	R-HSA-68946;R-HSA-68948;R-HSA-69015;R-HSA-69016;R-HSA-69019
R-HSA-1236382	Constitutive Signaling by Ligand-Responsive EGFR Cancer Variants	4	26	0	117	0.00170604	0.0490371	0.257004	23	23	0.00162533	9606	Homo sapiens	Ubb;Uba52;Hsp90aa1				R-HSA-1218833;R-HSA-1225947;R-HSA-1226014;R-HSA-1225950;R-HSA-1225951;R-HSA-1226012;R-HSA-1225949;R-HSA-1220610;R-HSA-1220611;R-HSA-1247842;R-HSA-1247841;R-HSA-1226016;R-HSA-1225952;R-HSA-1220614;R-HSA-1225956;R-HSA-1220612;R-HSA-1247844;R-HSA-1225957;R-HSA-1220613;R-HSA-1218824;R-HSA-1225960;R-HSA-1225961;R-HSA-1169421
R-HSA-5637815	Signaling by Ligand-Responsive EGFR Variants in Cancer	4	26	0	117	0.00170604	0.0490371	0.257004	23	23	0.00162533	9606	Homo sapiens	Ubb;Uba52;Hsp90aa1				R-HSA-1218833;R-HSA-1225947;R-HSA-1226014;R-HSA-1225950;R-HSA-1225951;R-HSA-1226012;R-HSA-1225949;R-HSA-1220610;R-HSA-1220611;R-HSA-1247842;R-HSA-1247841;R-HSA-1226016;R-HSA-1225952;R-HSA-1220614;R-HSA-1225956;R-HSA-1220612;R-HSA-1247844;R-HSA-1225957;R-HSA-1220613;R-HSA-1218824;R-HSA-1225960;R-HSA-1225961;R-HSA-1169421
R-HSA-5603041	IRAK4 deficiency (TLR2/4)	2	27	0	11	0.00177165	0.049886	0.257004	2	2	0.000141	9606	Homo sapiens	S100a9;S100a8				R-HSA-5602353;R-HSA-5602672
