# Supplementary material for: Chronic hypoxia disrupts T regulatory cell phenotype contributing to the emergence of exTreg-TH17 cells
Source: Front Physiol. 2024 Jan 29;14:1304732. doi: 10.3389/fphys.2023.1304732 (PMC10859758; doi:10.3389/fphys.2023.1304732)
Supplement: Supplementary file 6 [file Table5.XLSX]

## Sheet: B cells_pathway
ClusterID	ID	Description	setSize	enrichmentScore	NES	pvalue	p.adjust	qvalue	rank	leading_edge	core_enrichment	PathwayDB
B cells	mmu05171	Coronavirus disease - COVID-19 - Mus musculus (house mouse)	134	0.846775	2.25512	1e-10	2.90909e-09	2.44976e-09	376	tags=54%, list=6%, signal=52%	Uba52/Rpl15/Rps18/Rpl10/Rps15a/Rpl32/Rps7/Rps3/Rplp0/Rps11/Rpl34/Rpl11/Rpl21/Rpl9/Rps5/Rpl28/Rps4x/Rpl14/Rps2/Rpl29/Rpl36/Rpl26/Rpl8/Rpl24/Rpl13/Rpl39/Rpl10a/Rpl3/Rpl35/Fau/Rpl17/Rpl19/Rpl12/Rpl6/Rps13/Rpl18a/Rps27a/Rps10/Rpl27a/Rpl22l1/Rpsa/Rps23/Rps16/Rpl18/Rps24/Rps27/Rpl30/Rpl37/Rps20/Rpl23/Rpl7a/Jun/Rpl7/Rpl36al/Rps29/Rpl13a/Rps19/Rps3a1/Rpl38/Rps21/Rpl27/Rpl36a/Fos/Rps25/Rps14/Nfkbia/Rpl35a…	Kegg Pathway
B cells	mmu03010	Ribosome - Mus musculus (house mouse)	125	0.83215	2.21325	1e-10	2.90909e-09	2.44976e-09	551	tags=64%, list=8%, signal=60%	Uba52/Rpl15/Rps18/Rpl10/Rps15a/Rpl32/Rps7/Rps3/Rplp0/Rps11/Rpl34/Rpl11/Rpl21/Rpl9/Rps5/Rpl28/Rps4x/Rpl14/Rps2/Rpl29/Rpl36/Rpl26/Rpl8/Rpl24/Rpl13/Rpl39/Rpl10a/Rpl3/Rpl35/Fau/Rpl17/Rpl19/Rpl12/Rpl6/Rps13/Rpl18a/Rps27a/Rps10/Rpl27a/Rpl22l1/Rpsa/Rps23/Rps16/Rpl18/Rps24/Rps27/Rpl30/Rpl37/Rps20/Rpl23/Rpl7a/Rpl7/Rpl36al/Rps29/Rpl13a/Rps19/Rps3a1/Rpl38/Rps21/Mrpl23/Rpl27/Rpl36a/Rps25/Rps14/Mrps16/Mrps14/…	Kegg Pathway
B cells	mmu00190	Oxidative phosphorylation - Mus musculus (house mouse)	96	0.775996	2.03519	1e-10	2.90909e-09	2.44976e-09	1037	tags=70%, list=15%, signal=60%	Cox8a/Atp5g1/Cox5b/Cox6c/Atp5g2/Atp5j2/Ndufa13/Cox7b/Ndufa11/Atp5d/Ndufa7/Cox7a2/Cox6b1/Atp5j/Atp5c1/Atp5e/Ndufa4/Uqcrb/Ndufa12/Cox7c/Atp6v0e/Uqcr10/Atp6v1f/Ndufs4/Atp5b/Cox5a/Ndufb7/Ndufs8/Atp5o/Ndufb11/Atp5h/Ndufb4/Ndufb5/Cox4i1/Ndufb8/Cox7a2l/Ndufv2/Sdhb/Ndufs5/Ndufa3/Ndufv3/Ndufa5/Atp5k/Ndufc2/Cyc1/Ndufb9/Atp6v0c/Ndufa1/Atp6v1g1/Atp5l/Ndufa8/Ndufb2/Ndufs3/Uqcrfs1/Ndufs7/Ndufc1/Uqcrq/Cycs/Uqcr…	Kegg Pathway
B cells	mmu05012	Parkinson disease - Mus musculus (house mouse)	178	0.736651	1.98942	1e-10	2.90909e-09	2.44976e-09	1064	tags=57%, list=16%, signal=50%	Ubb/Uba52/Cox8a/Atp5g1/Rps27a/Cox5b/Cox6c/Atp5g2/Park7/Ndufa13/Calm1/Cox7b/Ndufa11/Atp5d/Ndufa7/Cox7a2/Cox6b1/Atp5j/Atp5c1/Psmb2/Atp5e/Ndufa4/Uqcrb/Psmb3/Slc25a4/Ndufa12/Psma2/Cox7c/Uqcr10/Psmb1/Psmd8/Calm2/Psmb6/Ndufs4/Psma4/Bax/Atp5b/Psma3/Psmb5/Cox5a/Ndufb7/Ndufs8/Atp5o/Ndufb11/Atp5h/Ndufb4/Txn1/Psma5/Ndufb5/Cox4i1/Ndufb8/Cox7a2l/Ndufv2/Sdhb/Ndufs5/Ndufa3/Ndufv3/Psmd4/Ubc/Ndufa5/Psma7/Vdac2/Gn…	Kegg Pathway
B cells	mmu05415	Diabetic cardiomyopathy - Mus musculus (house mouse)	129	0.706053	1.88083	1e-10	2.90909e-09	2.44976e-09	887	tags=50%, list=13%, signal=45%	Cyba/Gapdh/Cox8a/Atp5g1/Cox5b/Cox6c/Atp5g2/Ndufa13/Cox7b/Ndufa11/Atp5d/Ndufa7/Cox7a2/Cox6b1/Atp5j/Atp5c1/Rac2/Atp5e/Ndufa4/Uqcrb/Slc25a4/Ndufa12/Cox7c/Uqcr10/Ndufs4/Atp5b/Cox5a/Ndufb7/Ndufs8/Atp5o/Ndufb11/Atp5h/Ndufb4/Ndufb5/Ncf4/Cox4i1/Ndufb8/Cox7a2l/Ndufv2/Sdhb/Ndufs5/Ndufa3/Ndufv3/Ndufa5/Vdac2/Mpc2/Ndufc2/Cyc1/Ndufb9/Slc25a5/Mpc1/Ndufa1/Ndufa8/Ndufb2/Ndufs3/Uqcrfs1/Ndufs7/Ndufc1/Uqcrq/Vdac3/Uq…	Kegg Pathway
B cells	mmu05016	Huntington disease - Mus musculus (house mouse)	195	0.680062	1.84393	1e-10	2.90909e-09	2.44976e-09	1056	tags=51%, list=16%, signal=44%	Cox8a/Atp5g1/Cox5b/Cox6c/Atp5g2/Ndufa13/Cox7b/Ndufa11/Atp5d/Ndufa7/Clta/Cox7a2/Cox6b1/Atp5j/Atp5c1/Psmb2/Atp5e/Ndufa4/Uqcrb/Psmb3/Slc25a4/Ndufa12/Psma2/Cox7c/Uqcr10/Psmb1/Psmd8/Psmb6/Ndufs4/Psma4/Bax/Atp5b/Psma3/Psmb5/Cox5a/Ndufb7/Polr2j/Ndufs8/Atp5o/Ndufb11/Atp5h/Ndufb4/Psma5/Ndufb5/Cox4i1/Ndufb8/Cox7a2l/Ndufv2/Sdhb/Ndufs5/Ndufa3/Ndufv3/Psmd4/Ndufa5/Psma7/Vdac2/Ndufc2/Cyc1/Psmd12/Ndufb9/Slc25a5/…	Kegg Pathway
B cells	mmu05020	Prion disease - Mus musculus (house mouse)	175	0.675792	1.82545	1e-10	2.90909e-09	2.44976e-09	1044	tags=53%, list=15%, signal=46%	Cyba/Cox8a/Atp5g1/Cox5b/Cox6c/Atp5g2/Ndufa13/Cox7b/Ndufa11/Atp5d/Ndufa7/Cox7a2/Cox6b1/Atp5j/Atp5c1/Psmb2/Rac2/Atp5e/Ndufa4/Uqcrb/Psmb3/Slc25a4/Ndufa12/Psma2/Cox7c/Uqcr10/Psmb1/Psmd8/Psmb6/Ndufs4/Psma4/Bax/Atp5b/Psma3/Psmb5/Cox5a/Ndufb7/Ndufs8/Atp5o/Ndufb11/Atp5h/Ndufb4/Psma5/Ndufb5/Ncf4/Cox4i1/Ndufb8/Cox7a2l/Ndufv2/Sdhb/Ndufs5/Ndufa3/Ndufv3/Psmd4/Ndufa5/Psma7/Vdac2/Ndufc2/Cyc1/Psmd12/Ndufb9/Slc25…	Kegg Pathway
B cells	mmu04714	Thermogenesis - Mus musculus (house mouse)	145	0.67879	1.82179	1e-10	2.90909e-09	2.44976e-09	1103	tags=50%, list=16%, signal=42%	Cox8a/Atp5g1/Cox5b/Cox6c/Atp5g2/Atp5j2/Ndufa13/Cox7b/Ndufa11/Atp5d/Ndufa7/Cox7a2/Cox6b1/Atp5j/Atp5c1/Atp5e/Ndufa4/Uqcrb/Ndufa12/Cox7c/Actb/Uqcr10/Ndufs4/Atp5b/Cox5a/Ndufb7/Ndufs8/Atp5o/Ndufb11/Atp5h/Ndufb4/Ndufb5/Cox4i1/Ndufb8/Rps6/Cox7a2l/Ndufv2/Sdhb/Ndufs5/Ndufa3/Ndufv3/Ndufa5/Atp5k/Kras/Ndufc2/Cyc1/Ndufb9/Coa3/Ndufa1/Atp5l/Ndufa8/Ndufb2/Ndufs3/Uqcrfs1/Ndufs7/Rheb/Gnas/Ndufc1/Uqcrq/Cox16/Uqcrc1…	Kegg Pathway
B cells	mmu05010	Alzheimer disease - Mus musculus (house mouse)	227	0.64318	1.75593	1e-10	2.90909e-09	2.44976e-09	1060	tags=42%, list=16%, signal=37%	Gapdh/Cox8a/Atp5g1/Cox5b/Cox6c/Atp5g2/Ndufa13/Calm1/Cox7b/Ndufa11/Atp5d/Ndufa7/Cox7a2/Cox6b1/Atp5j/Atp5c1/Psmb2/Atp5e/Ndufa4/Uqcrb/Psmb3/Slc25a4/Ndufa12/Psma2/Cox7c/Psenen/Uqcr10/Psmb1/Psmd8/Calm2/Psmb6/Ndufs4/Psma4/Atp5b/Psma3/Psmb5/Cox5a/Ndufb7/Ndufs8/Atp5o/Ndufb11/Atp5h/Ndufb4/Psma5/Ndufb5/Cox4i1/Ndufb8/Cox7a2l/Ndufv2/Sdhb/Ndufs5/Ndufa3/Ndufv3/Psmd4/Ndufa5/Psma7/Vdac2/Kras/Ndufc2/Cyc1/Psmd12/N…	Kegg Pathway
B cells	mmu05014	Amyotrophic lateral sclerosis - Mus musculus (house mouse)	230	0.630006	1.72125	1e-10	2.90909e-09	2.44976e-09	1044	tags=43%, list=15%, signal=37%	Pfn1/Cox8a/Atp5g1/Cox5b/Cox6c/Atp5g2/Ndufa13/Cox7b/Ndufa11/Atp5d/Ndufa7/Hnrnpa1/Cox7a2/Cox6b1/Atp5j/Atp5c1/Psmb2/Atp5e/Ndufa4/Uqcrb/Psmb3/Ndufa12/Psma2/Cox7c/Actb/Uqcr10/Psmb1/Psmd8/Psmb6/Ndufs4/Psma4/Map1lc3b/Bax/Atp5b/Psma3/Psmb5/Cox5a/Ndufb7/Ndufs8/Atp5o/Ndufb11/Atp5h/Ndufb4/Psma5/Ndufb5/Cox4i1/Ndufb8/Cox7a2l/Chchd10/Ndufv2/Sdhb/Ndufs5/Ndufa3/Ndufv3/Psmd4/Ndufa5/Psma7/Ndufc2/Cyc1/Psmd12/Ndufb9…	Kegg Pathway
B cells	mmu05022	Pathways of neurodegeneration - multiple diseases - Mus musculus (house mouse)	267	0.622903	1.70867	1e-10	2.90909e-09	2.44976e-09	1079	tags=40%, list=16%, signal=35%	Ubb/Uba52/Cox8a/Atp5g1/Rps27a/Cox5b/Cox6c/Atp5g2/Park7/Ndufa13/Calm1/Cox7b/Ndufa11/Atp5d/Ndufa7/Cox7a2/Cox6b1/Atp5j/Atp5c1/Psmb2/Atp5e/Ndufa4/Uqcrb/Psmb3/Slc25a4/Ndufa12/Psma2/Cox7c/Uqcr10/Psmb1/Psmd8/Calm2/Psmb6/Ndufs4/Psma4/Map1lc3b/Bax/Atp5b/Psma3/Psmb5/Cox5a/Ndufb7/Ndufs8/Atp5o/Ndufb11/Atp5h/Ndufb4/Psma5/Ndufb5/Cox4i1/Ndufb8/Cox7a2l/Ndufv2/Sdhb/Ndufs5/Ndufa3/Ndufv3/Psmd4/Ubc/Ndufa5/Psma7/Vdac…	Kegg Pathway
B cells	mmu05208	Chemical carcinogenesis - reactive oxygen species - Mus musculus (house mouse)	144	0.674961	1.80948	5.70488e-10	1.5213e-08	1.2811e-08	1079	tags=50%, list=16%, signal=43%	Cyba/Cox8a/Atp5g1/Cox5b/Cox6c/Atp5g2/Ndufa13/Cox7b/Ndufa11/Atp5d/Ndufa7/Jun/Cox7a2/Cox6b1/Atp5j/Atp5c1/Atp5e/Ndufa4/Uqcrb/Slc25a4/Ndufa12/Cox7c/Uqcr10/Fos/Ndufs4/Atp5b/Cox5a/Ndufb7/Ndufs8/Atp5o/Nfkbia/Ndufb11/Atp5h/Ndufb4/Ndufb5/Cox4i1/Ndufb8/Cox7a2l/Ndufv2/Sdhb/Ndufs5/Ndufa3/Ndufv3/Ndufa5/Vdac2/Kras/Ndufc2/Cyc1/Ndufb9/Slc25a5/Ndufa1/Ndufa8/Ndufb2/Ndufs3/Uqcrfs1/Acp1/Ndufs7/Ndufc1/Uqcrq/Vdac3/Uqc…	Kegg Pathway
B cells	GO:0003735	structural constituent of ribosome	152	0.807484	2.21155	1e-10	5.175e-08	4.6e-08	559	tags=57%, list=8%, signal=53%	Uba52/Rpl15/Rps18/Rpl10/Rps15a/Rpl32/Rps7/Rps3/Rplp0/Rps11/Rpl34/Rpl11/Rpl21/Rpl9/Rps5/Rpl28/Rps4x/Rpl14/Rps2/Rpl29/Rpl36/Rpl26/Rpl8/Rpl24/Rpl13/Rpl39/Rpl10a/Rpl3/Rpl35/Fau/Rpl17/Rpl19/Rpl12/Rpl6/Rps13/Rpl18a/Rps27a/Rps10/Rpl27a/Rpl22l1/Rpsa/Rps23/Rps16/Rpl18/Rps24/Rps27/Rpl30/Rpl37/Rps20/Rpl23/Ndufa7/Rpl7a/Rpl7/Rpl36al/Rps29/Rpl13a/Rps19/Rps3a1/Mrpl54/Rpl38/Rps21/Mrpl23/Rpl27/Rpl36a/Rps25/Rps14/…	GO Molecular Function
B cells	GO:0005198	structural molecule activity	228	0.760163	2.08801	1e-10	5.175e-08	4.6e-08	754	tags=46%, list=11%, signal=42%	Uba52/Rpl15/Rps18/Rpl10/Rps15a/Rpl32/Rps7/Rps3/Rplp0/Rps11/Rpl34/Rpl11/Rpl21/Rpl9/Rps5/Rpl28/Rps4x/Rpl14/Rps2/Rpl29/Rpl36/Rpl26/Rpl8/Rpl24/Rpl13/Rpl39/Rpl10a/Rpl3/Rpl35/Fau/Rpl17/Rpl19/Arpc3/Vim/Rpl12/Rpl6/Rps13/Rpl18a/Rps27a/Rps10/Rpl27a/Rpl22l1/Rpsa/Rps23/Rps16/Rpl18/Rps24/Rps27/Rpl30/Rpl37/Rps20/Rpl23/Ndufa7/Rpl7a/Clta/Rpl7/Rpl36al/Rps29/Rpl13a/Rps19/Rps3a1/Mrpl54/Arpc1b/Rpl38/Rps21/Actb/Mrpl2…	GO Molecular Function
B cells	mmu04932	Non-alcoholic fatty liver disease - Mus musculus (house mouse)	109	0.68629	1.81655	4.5995e-09	1.13218e-07	9.53418e-08	1079	tags=50%, list=16%, signal=43%	Cox8a/Cox5b/Cox6c/Ndufa13/Cox7b/Ndufa11/Ndufa7/Jun/Cox7a2/Cox6b1/Ndufa4/Uqcrb/Ndufa12/Cox7c/Uqcr10/Fos/Ndufs4/Bax/Cox5a/Ndufb7/Ndufs8/Ndufb11/Ndufb4/Ndufb5/Cox4i1/Ndufb8/Cox7a2l/Ndufv2/Sdhb/Ndufs5/Ndufa3/Ndufv3/Ndufa5/Ndufc2/Cyc1/Ndufb9/Ndufa1/Ndufa8/Ndufb2/Eif2s1/Ndufs3/Uqcrfs1/Ndufs7/Ndufc1/Uqcrq/Cycs/Uqcrc1/Ndufb3/Uqcr11/Ndufab1/Ndufs2/Ndufb10/Ndufa6/Ndufa2/Rac1	Kegg Pathway
B cells	GO:0002181	cytoplasmic translation	128	0.811139	2.19072	1e-10	1.1656e-07	1.09811e-07	612	tags=59%, list=9%, signal=54%	Uba52/Rpl15/Rps18/Rps15a/Rpl32/Rps7/Rps3/Rplp0/Rps11/Rpl34/Rpl11/Rpl21/Rpl9/Rps5/Rpl28/Rps4x/Rpl14/Rps2/Rpl29/Rpl36/Rpl26/Rpl8/Rpl24/Rpl13/Rpl39/Rpl10a/Rpl3/Fau/Rpl17/Rpl19/Rpl12/Rpl6/Rps13/Rpl18a/Rps27a/Rps10/Rpl27a/Rpl22l1/Rpsa/Rps23/Rps16/Rpl18/Rps24/Rpl30/Eif3i/Rps20/Rpl23/Rpl7a/Rpl7/Rps29/Rpl13a/Rps19/Rps3a1/Hnrnpd/Eif3m/Rpl38/Rps21/Rpl27/Rpl36a/Rps25/Rps14/Pkm/Rpl35a/Rpl5/Rps8/Rps6/Rps28/Rp…	GO Biological Process
B cells	GO:0006119	oxidative phosphorylation	93	0.760314	2.02622	1e-10	1.1656e-07	1.09811e-07	1055	tags=67%, list=15%, signal=57%	Cox5b/Park7/Atp5j2/Ndufa13/Ndufa11/Atp5d/Ndufa7/Cox7a2/Atp5j/Atp5c1/Atp5e/Uqcrb/Ndufa12/Rhoa/Cox7c/Uqcr10/Chchd2/Ndufs4/Atp5b/Cox5a/Ndufb7/Ndufs8/Atp5o/Ndufb11/Atp5h/Ndufb4/Ndufb5/Cox4i1/Ndufb8/Cox7a2l/Chchd10/Ndufv2/Sdhb/Ndufs5/Ndufa3/Ndufv3/Ndufa5/Atp5k/Ndufc2/Cyc1/Ndufb9/Ndufa1/Ndufa8/Ndufb2/Ndufs3/Uqcrfs1/Dnajc15/Dguok/Ndufs7/Uqcc2/Ndufc1/Uqcrq/Cycs/Uqcrc1/Ndufb3/Uqcr11/Ndufab1/Ndufs2/Ndufb10…	GO Biological Process
B cells	GO:0009142	nucleoside triphosphate biosynthetic process	82	0.745265	1.96956	1e-10	1.1656e-07	1.09811e-07	1055	tags=62%, list=15%, signal=53%	Nme2/Atp5g1/Aldoa/Atp5g2/Eno1/Atp5j2/Ndufa13/Ndufa11/Atp5d/Ndufa7/Atp5j/Atp5c1/Atp5e/Ndufa12/Ndufs4/Atp5b/Ndufb7/Ndufs8/Atp5o/Pkm/Ndufb11/Nme1/Atp5h/Ndufb4/Ndufb5/Ndufb8/Ndufv2/Sdhb/Ndufs5/Ndufa3/Ndufv3/Ndufa5/Atp5k/Ndufc2/Ndufb9/Ndufa1/Atp5l/Ndufa8/Ndufb2/Ndufs3/Dguok/Ndufs7/Ndufc1/Cmpk1/Ndufb3/Ndufab1/Ndufs2/Pnp/Ndufb10/Ndufa6/Ndufa2	GO Biological Process
B cells	GO:0006412	translation	490	0.62256	1.73457	1e-10	1.1656e-07	1.09811e-07	955	tags=32%, list=14%, signal=30%	Uba52/Rpl15/Rps18/Rbm3/Rpl10/Rps15a/Rpl32/Rps7/Rps3/Rplp0/Rps11/Rpl34/Rpl11/Rpl21/Rpl9/Rps5/Rpl28/Rps4x/Rpl14/Rps2/Gapdh/Rpl29/Rpl36/Rpl26/Rpl8/Rpl24/Rpl13/Rpl39/Rpl10a/Rpl3/Rpl35/Fau/Rpl17/Rpl19/Vim/Rpl12/Rpl6/Rps13/Eif3h/Rpl18a/Rps27a/Rps10/Rpl27a/Rpl22l1/Cirbp/Rpsa/Rps23/Rps16/Rpl18/Rps24/Rpl30/Rpl37/Eif3i/Rps20/Rpl23/Lars2/Ndufa7/Eif5a/Rpl7a/Rpl7/Rps29/Rpl13a/Rps19/Rps3a1/Eef1a1/Eef1d/Eef1b2/…	GO Biological Process
B cells	GO:0043043	peptide biosynthetic process	496	0.619919	1.72649	1e-10	1.1656e-07	1.09811e-07	955	tags=32%, list=14%, signal=30%	Uba52/Rpl15/Rps18/Rbm3/Rpl10/Rps15a/Rpl32/Rps7/Rps3/Rplp0/Rps11/Rpl34/Rpl11/Rpl21/Rpl9/Rps5/Rpl28/Rps4x/Rpl14/Rps2/Gapdh/Rpl29/Rpl36/Rpl26/Rpl8/Rpl24/Rpl13/Rpl39/Rpl10a/Rpl3/Rpl35/Fau/Rpl17/Rpl19/Vim/Rpl12/Rpl6/Rps13/Eif3h/Rpl18a/Rps27a/Rps10/Rpl27a/Rpl22l1/Cirbp/Rpsa/Rps23/Rps16/Rpl18/Rps24/Rpl30/Rpl37/Eif3i/Rps20/Rpl23/Lars2/Ndufa7/Eif5a/Rpl7a/Rpl7/Rps29/Rpl13a/Rps19/Rps3a1/Eef1a1/Eef1d/Eef1b2/…	GO Biological Process
B cells	GO:0046390	ribose phosphate biosynthetic process	124	0.677417	1.82717	8.57096e-10	4.99516e-07	4.70591e-07	1055	tags=44%, list=15%, signal=38%	Nme2/Atp5g1/Aldoa/Atp5g2/Eno1/Atp5j2/Ndufa13/Ndufa11/Atp5d/Ndufa7/Atp5j/Atp5c1/Atp5e/Ndufa12/Ndufs4/Atp5b/Ndufb7/Ndufs8/Atp5o/Pkm/Ndufb11/Nme1/Atp5h/Ndufb4/Ndufb5/Ndufb8/Ndufv2/Sdhb/Ndufs5/Ndufa3/Ndufv3/Ndufa5/Atp5k/Mpc2/Ndufc2/Ndufb9/Mpc1/Ndufa1/Atp5l/Ndufa8/Ndufb2/Hprt/Ndufs3/Dguok/Aprt/Ndufs7/Ndufc1/Cmpk1/Ndufb3/Ndufab1/Ndufs2/Pnp/Ndufb10/Ndufa6/Ndufa2	GO Biological Process
B cells	GO:0009060	aerobic respiration	125	0.679388	1.83317	1.00128e-09	5.30495e-07	4.99776e-07	1093	tags=54%, list=16%, signal=47%	Cox5b/Park7/Atp5j2/Ndufa13/Ndufa11/Atp5d/Ndufa7/Cox7a2/Atp5j/Atp5c1/Atp5e/Uqcrb/Ndufa12/Rhoa/Cox7c/Uqcr10/Chchd2/Ndufs4/Atp5b/Cox5a/Ndufb7/Ndufs8/Atp5o/Ndufb11/Atp5h/Ndufb4/Ndufb5/Cox4i1/Ndufb8/Cox7a2l/Chchd10/Ndufv2/Sdhb/Ndufs5/Ndufa3/Ndufv3/Ndufa5/Atp5k/Ndufc2/Cyc1/Ndufb9/Bloc1s1/Ndufa1/Ndufa8/Ndufb2/Ndufs3/Uqcrfs1/Dnajc15/Dguok/Mdh1/Ndufs7/Uqcc2/Ndufc1/Uqcrq/Cycs/Uqcrc1/Ndufb3/Uqcr11/Suclg1/Nd…	GO Biological Process
B cells	GO:0015078	proton transmembrane transporter activity	53	0.786605	2.01501	3.86652e-09	1.33395e-06	1.18573e-06	599	tags=53%, list=9%, signal=49%	Cox8a/Atp5g1/Cox6c/Atp5g2/Atp5j2/Cox7b/Atp5d/Cox7a2/Atp5j/Atp5c1/Atp5e/Slc25a4/Cox7c/Atp6v0e/Atp6v1f/Atp5b/Cox5a/Atp5o/Atp5h/Cox4i1/Cox7a2l/Atp5k/Cyc1/Slc25a5/Atp6v0c/Atp6v1g1/Atp5l/Uqcrfs1	GO Molecular Function
B cells	mmu05143	African trypanosomiasis - Mus musculus (house mouse)	11	0.956459	1.94908	8.77038e-08	2.00466e-06	1.68813e-06	5	tags=36%, list=0%, signal=36%	Hbb-bs/Hba-a2/Hba-a1/Hbb-bt	Kegg Pathway
B cells	GO:0042254	ribosome biogenesis	242	0.597343	1.64431	1.002e-08	3.24426e-06	3.0564e-06	1753	tags=44%, list=25%, signal=34%	Rpl10/Rps7/Rplp0/Rpl11/Rps5/Rpl14/Rps2/Rpl26/Rpl24/Rpl10a/Rpl35/Rpl6/Rpsa/Rps16/Rps24/Rps27/Rpl7a/Rpl7/Rps19/Rpl38/Rps21/Rpl27/Rps25/Trmt112/Rps14/Nop10/Rpl35a/Rpl5/Rps8/Rps6/Rps28/Eif6/Fbl/Rbis/Nhp2/Snu13/Imp3/Pak1ip1/Pa2g4/Nsa2/C1qbp/Mrpl20/Wdr43/Exosc8/Npm1/Ran/Rrp1/Frg1/Ncl/Utp14a/C1d/Nop58/Gtf2h5/Fcf1/Gar1/Rrp15/Exosc7/Mrto4/Rps27rt/Ddx27/Wdr74/Nop14/Ebna1bp2/Pop7/Ddx21/Mrpl36/Pop5/Mphosph10…	GO Biological Process
B cells	GO:0019843	rRNA binding	59	0.761549	1.97602	3.31566e-08	8.57927e-06	7.62602e-06	740	tags=47%, list=11%, signal=43%	Rps18/Rps3/Rplp0/Rps11/Rpl11/Rpl9/Rps5/Rps4x/Rpl8/Rpl3/Rpl17/Rpl19/Rpl12/Rpl6/Rps13/Cirbp/Rpl37/Rpl23/Rpl7/Rps14/Rpl5/Mrps18c/Rpl4/Imp3/Mrpl20/Npm1/Mrpl18/Rps9	GO Molecular Function
B cells	GO:0006364	rRNA processing	176	0.606783	1.65615	2.27094e-07	5.75436e-05	5.42115e-05	1753	tags=46%, list=25%, signal=35%	Rps7/Rpl11/Rpl14/Rpl26/Rpl10a/Rpl35/Rps16/Rps24/Rps27/Rpl7a/Rpl7/Rps19/Rps21/Rpl27/Rps25/Trmt112/Rps14/Nop10/Rpl35a/Rpl5/Rps8/Rps6/Rps28/Eif6/Fbl/Nhp2/Snu13/Imp3/Pa2g4/Nsa2/Wdr43/Exosc8/Npm1/Rrp1/Frg1/Ncl/Utp14a/C1d/Gtf2h5/Fcf1/Gar1/Rrp15/Exosc7/Mrto4/Rps27rt/Ddx27/Wdr74/Nop14/Ebna1bp2/Pop7/Ddx21/Pop5/Mphosph10/Rpf1/Exosc5/Rps17/Mak16/Utp11/Brix1/Utp3/Bud23/Nop53/Exosc4/Sbds/Wdr12/Mphosph6/Utp18/…	GO Biological Process
B cells	mmu04723	Retrograde endocannabinoid signaling - Mus musculus (house mouse)	66	0.692901	1.78378	7.38413e-06	0.000157528	0.000132655	1037	tags=53%, list=15%, signal=45%	Ndufa13/Gng5/Ndufa11/Ndufa7/Ndufa4/Ndufa12/Ndufs4/Ndufb7/Ndufs8/Ndufb11/Gng10/Ndufb4/Ndufb5/Ndufb8/Ndufv2/Ndufs5/Ndufa3/Ndufv3/Gngt2/Ndufa5/Gnai2/Ndufc2/Ndufb9/Ndufa1/Ndufa8/Ndufb2/Ndufs3/Ndufs7/Ndufc1/Ndufb3/Ndufab1/Ndufs2/Ndufb10/Ndufa6/Ndufa2	Kegg Pathway
B cells	GO:0016072	rRNA metabolic process	198	0.578323	1.58547	8.4717e-07	0.000197492	0.000186056	1753	tags=42%, list=25%, signal=32%	Rps7/Rpl11/Rpl14/Rpl26/Rpl10a/Rpl35/Rps16/Rps24/Rps27/Rpl7a/Rpl7/Rps19/Rps21/Rpl27/Rps25/Trmt112/Rps14/Nop10/Rpl35a/Rpl5/Rps8/Rps6/Rps28/Eif6/Fbl/Zcchc7/Nhp2/Snu13/Imp3/Pa2g4/Nsa2/Wdr43/Exosc8/Npm1/Rrp1/Frg1/Ncl/Utp14a/C1d/Gtf2h5/Fcf1/Gar1/Rrp15/Exosc7/Mrto4/Rps27rt/Trir/Ddx27/Wdr74/Nop14/Ebna1bp2/Pop7/Ddx21/Pop5/Mphosph10/Rpf1/Exosc5/Rps17/Mak16/Utp11/Brix1/Utp3/Bud23/Nop53/Exosc4/Sbds/Wdr12/Mph…	GO Biological Process
B cells	mmu04260	Cardiac muscle contraction - Mus musculus (house mouse)	31	0.779081	1.88373	1.20297e-05	0.000240593	0.000202605	846	tags=58%, list=13%, signal=51%	Cox8a/Cox5b/Cox6c/Cox7b/Cox7a2/Cox6b1/Uqcrb/Cox7c/Uqcr10/Cox5a/Cox4i1/Cox7a2l/Cyc1/Tpm3/Uqcrfs1/Uqcrq/Uqcrc1/Uqcr11	Kegg Pathway
B cells	mmu05144	Malaria - Mus musculus (house mouse)	14	0.886535	1.89477	1.30117e-05	0.000244926	0.000206253	5	tags=29%, list=0%, signal=29%	Hbb-bs/Hba-a2/Hba-a1/Hbb-bt	Kegg Pathway
B cells	GO:0009055	electron transfer activity	43	0.755523	1.91892	2.08047e-06	0.000430657	0.000382806	900	tags=58%, list=13%, signal=51%	Cyba/Cox8a/Cox6c/Cox7b/Ndufa7/Cox7a2/Cox7c/Ndufs4/Cox5a/Ndufb7/Ndufs8/Cox4i1/Ndufb8/Cox7a2l/Ndufv2/Sdhb/Etfb/Ndufc2/Cyc1/Ndufs3/Uqcrfs1/Ndufs7/Uqcrq/Uqcr11/Ndufs2	GO Molecular Function
B cells	GO:1902253	regulation of intrinsic apoptotic signaling pathway by p53 class mediator	24	0.845456	1.97352	2.15676e-06	0.000465541	0.000438583	104	tags=25%, list=2%, signal=25%	Ubb/Rps7/Rpl11/Rpl26/Cd74/Mif	GO Biological Process
B cells	mmu03050	Proteasome - Mus musculus (house mouse)	44	0.72111	1.81172	3.03447e-05	0.000539461	0.000454283	1044	tags=66%, list=15%, signal=56%	Psmb8/Psmb2/Psmb3/Psma2/Psme1/Psmb1/Psmd8/Psme2/Psmb6/Psma4/Psma3/Psmb5/Psmb10/Pomp/Psma5/Psmd4/Psma7/Psmb9/Psmd12/Psmd7/Psmc5/Psma1/Psmc2/Psma6/Sem1/Psmd14/Psmc4/Psmb7/Psmc3	Kegg Pathway
B cells	GO:0015453	oxidoreduction-driven active transmembrane transporter activity	31	0.788732	1.91648	3.32507e-06	0.000573574	0.000509844	900	tags=71%, list=13%, signal=62%	Cox8a/Cox6c/Cox7b/Ndufa7/Cox7a2/Cox7c/Ndufs4/Cox5a/Ndufb7/Ndufs8/Cox4i1/Ndufb8/Cox7a2l/Ndufv2/Ndufc2/Cyc1/Ndufs3/Uqcrfs1/Ndufs7/Uqcrq/Uqcr11/Ndufs2	GO Molecular Function
B cells	GO:0042255	ribosome assembly	49	0.734359	1.87279	3.1946e-06	0.000642005	0.00060483	617	tags=37%, list=9%, signal=34%	Rpl10/Rplp0/Rpl11/Rps5/Rps2/Rpl24/Rpl6/Rpsa/Rps27/Rps19/Rpl38/Rps25/Rps14/Rpl5/Rps28/Eif6/C1qbp/Mrpl20	GO Biological Process
B cells	GO:0140053	mitochondrial gene expression	122	0.628012	1.69027	3.14409e-06	0.000642005	0.00060483	1745	tags=57%, list=25%, signal=43%	Lars2/Ndufa7/Mrpl54/Mrpl23/Mrps16/Mrps14/Mrps24/Aurkaip1/Chchd10/Mrpl43/Mrps18c/Mrpl30/Mrpl52/Mrpl33/Mrps33/Mrps34/Coa3/Mrpl17/C1qbp/Mrpl20/Mrpl15/Mrpl42/Uqcc2/Mrpl58/Mrpl21/Mrpl18/Mrpl57/Mrps26/Mrpl34/Chchd1/Mrps5/Mrpl11/Mrpl12/Mrps28/Mrpl27/Mrpl40/Hsd17b10/Mrpl55/Mrpl36/Mrpl2/Mthfs/Mrps15/Mrps21/Mrpl48/Mrpl14/Mrps10/Mrps17/Mrps18b/Mrpl46/Mrpl35/Mrps18a/Mrpl32/Mrpl24/Mrps12/Mrpl39/Mrpl19/Tfam/Mr…	GO Biological Process
B cells	mmu04931	Insulin resistance - Mus musculus (house mouse)	54	-0.511156	-2.04119	5.94307e-05	0.00100094	0.000842895	1181	tags=46%, list=18%, signal=38%	Mapk8/Insr/Rps6ka1/Pdpk1/Srebf1/Pik3ca/Prkce/Pik3r1/Cd36/Creb3l2/Irs2/Rps6ka3/Foxo1/Ppp1cb/Crtc2/Prkcb/Gfpt1/Creb1/Pten/Ptpa/Stat3/Rps6kb1/Prkcd/Nfkb1/Ogt	Kegg Pathway
B cells	mmu00360	Phenylalanine metabolism - Mus musculus (house mouse)	5	0.969254	1.69472	7.34058e-05	0.00117449	0.000989047	104	tags=40%, list=2%, signal=39%	Il4i1/Mif	Kegg Pathway
B cells	mmu05322	Systemic lupus erythematosus - Mus musculus (house mouse)	21	0.806705	1.85112	7.84898e-05	0.00119604	0.00100719	293	tags=43%, list=4%, signal=41%	H2-Eb1/H3f3a/H3f3b/H2-Ab1/H2-Aa/H2-DMa/H2-DMb2/H2-Oa/Snrpd1	Kegg Pathway
B cells	GO:0042026	protein refolding	13	-0.829897	-2.34042	1.01125e-05	0.00159286	0.00150062	26	tags=38%, list=0%, signal=38%	Hspa9/Hspd1/Hspa8/Hsp90aa1/Dnaja1	GO Biological Process
B cells	GO:0022857	transmembrane transporter activity	258	0.54056	1.49045	1.16014e-05	0.00171536	0.00152476	901	tags=23%, list=13%, signal=21%	S100a6/Clic1/Cox8a/Sec61g/Atp5g1/Cox6c/Atp5g2/Atp5j2/Cox7b/Atp5d/Ndufa7/Cox7a2/Atp5j/Atp5c1/Atp5e/Slc25a4/Cox7c/Atp6v0e/Atp6v1f/Ndufs4/Bax/Atp5b/Cox5a/Ndufb7/Ndufs8/Atp5o/Atp5h/Tomm22/Cox4i1/Ndufb8/Cox7a2l/Ndufv2/Vdac2/Atp5k/Mpc2/Ndufc2/Cyc1/Slc25a5/Timm23/Atp6v0c/Mpc1/Atp6v1g1/Atp5l/Ndufs3/Uqcrfs1/Hnrnpa3/Tmed10/Mfsd10/Anxa2/Timm17b/Ndufs7/Bcl2/Slc50a1/Mfsd4a/Uqcrq/Vdac3/Uqcr11/Ndufs2/Rasa3	GO Molecular Function
B cells	GO:0033108	mitochondrial respiratory chain complex assembly	68	0.690153	1.80473	1.16019e-05	0.00177936	0.00167633	1634	tags=71%, list=24%, signal=54%	Ndufa11/Ndufa12/Ndufs4/Ndufb7/Ndufs8/Ndufb11/Ndufb4/Ndufb5/Ndufb8/Ndufs5/Ndufa3/Ndufa5/Ndufc2/Ndufb9/Coa3/Ndufa1/Ndufa8/Ndufb2/Ndufs3/Sdhaf4/Ndufs7/Uqcc2/Ndufc1/Pet100/Sdhaf1/Cox16/Ndufb3/Ndufab1/Ndufs2/Tmem126a/Ndufb10/Immp2l/Ndufa6/Ndufa2/Dmac2/Cox20/Cox14/Ndufaf8/Oxa1l/Aifm1/Uqcc3/Ndufa9/Ndufb6/Smim20/Ndufaf3/Tfam/Ndufa10/Samm50	GO Biological Process
B cells	mmu04145	Phagosome - Mus musculus (house mouse)	81	0.628407	1.63577	0.000128531	0.00186954	0.00157435	677	tags=28%, list=10%, signal=26%	H2-Eb1/Cyba/H2-Ab1/H2-Aa/Sec61g/H2-D1/H2-DMa/H2-DMb2/Ctss/Atp6v0e/Actb/H2-Oa/Coro1a/Atp6v1f/H2-T23/H2-Q4/Ncf4/Sec61b/Atp6v0c/Atp6v1g1/Tubb4b/Tuba1a/H2-Ob	Kegg Pathway
B cells	GO:0002523	leukocyte migration involved in inflammatory response	8	-0.906683	-2.17403	1.94e-05	0.00269198	0.0025361	62	tags=38%, list=1%, signal=37%	Cd24a/S100a9/S100a8	GO Biological Process
B cells	GO:0002495	antigen processing and presentation of peptide antigen via MHC class II	20	0.825886	1.84872	2.0351e-05	0.00270495	0.00254832	258	tags=50%, list=4%, signal=48%	H2-Eb1/H2-Ab1/Ifi30/H2-Aa/Cd74/H2-DMa/H2-DMb2/Ctss/Pycard/H2-Oa	GO Biological Process
B cells	GO:0000028	ribosomal small subunit assembly	17	0.858266	1.85767	2.70903e-05	0.00309573	0.00291647	374	tags=53%, list=5%, signal=50%	Rps5/Rps2/Rpsa/Rps27/Rps19/Rpl38/Rps25/Rps14/Rps28	GO Biological Process
B cells	mmu05320	Autoimmune thyroid disease - Mus musculus (house mouse)	21	0.785527	1.80253	0.000301081	0.00385384	0.00324534	319	tags=43%, list=5%, signal=41%	H2-Eb1/H2-Ab1/H2-Aa/H2-D1/H2-DMa/H2-DMb2/H2-Oa/H2-T23/H2-Q4	Kegg Pathway
B cells	mmu05330	Allograft rejection - Mus musculus (house mouse)	21	0.785527	1.80253	0.000301081	0.00385384	0.00324534	319	tags=43%, list=5%, signal=41%	H2-Eb1/H2-Ab1/H2-Aa/H2-D1/H2-DMa/H2-DMb2/H2-Oa/H2-T23/H2-Q4	Kegg Pathway
B cells	mmu04137	Mitophagy - animal - Mus musculus (house mouse)	49	0.682207	1.72783	0.000285695	0.00385384	0.00324534	455	tags=22%, list=7%, signal=21%	Ubb/Uba52/Rps27a/Jun/Gabarapl2/Map1lc3b/Tomm7/Fis1/Ubc/Gabarap/Kras	Kegg Pathway
B cells	GO:0046034	ATP metabolic process	117	0.607401	1.62966	3.76626e-05	0.00406477	0.00382939	732	tags=40%, list=11%, signal=37%	Gapdh/Atp5g1/Aldoa/Atp5g2/Eno1/Atp5j2/Ndufa13/Ndufa11/Atp5d/Ndufa7/Atp5j/Atp5c1/Atp5e/Ndufa12/Tspo/Ndufs4/Atp5b/Ndufb7/Ndufs8/Atp5o/Pkm/Ndufb11/Atp5h/Ndufb4/Ndufb5/Fis1/Ndufb8/Eif6/Ndufv2/Sdhb/Ndufs5/Ndufa3/Ndufv3/Ndufa5/Atpif1/Tpi1/Atp5k/Ndufc2/Ndufb9/Ndufa1/Atp5l/Ndufa8/Ndufb2/Ndufs3/Dguok/Ndufs7/Ndufc1	GO Biological Process
B cells	GO:1901798	positive regulation of signal transduction by p53 class mediator	19	0.829214	1.84388	4.03727e-05	0.00427803	0.00403031	148	tags=37%, list=2%, signal=36%	Ubb/Rps7/Rpl11/Rpl26/Rpl37/Rps20/Rpl23	GO Biological Process
B cells	mmu04392	Hippo signaling pathway - multiple species - Mus musculus (house mouse)	10	-0.819398	-2.10645	0.000413732	0.00490349	0.00412925	714	tags=50%, list=11%, signal=45%	Mob1b/Lats1/Limd1/Rassf2/Mob1a	Kegg Pathway
B cells	mmu04152	AMPK signaling pathway - Mus musculus (house mouse)	69	-0.420092	-1.74398	0.000410715	0.00490349	0.00412925	1071	tags=30%, list=16%, signal=26%	Rab10/Ppp2r5c/Pdpk1/Srebf1/Ppp2r1a/Pik3ca/Pik3r1/Ppp2r5a/Foxo3/Cd36/Creb3l2/Irs2/Fasn/Foxo1/Crtc2/Creb1/Elavl1/Cab39/Rps6kb1/Scd1/Scd2	Kegg Pathway
B cells	GO:0001217	DNA-binding transcription repressor activity	119	-0.369866	-1.71972	6.46958e-05	0.00565543	0.00502705	890	tags=25%, list=13%, signal=22%	Zfp263/Smad5/Foxo3/Zfp952/Srebf2/Zbtb7a/Trps1/Bhlhe40/Nr3c1/Zfp217/Foxo1/Myc/Ski/Purb/Sp3/Zbtb4/Bach2/Etv3/Ikzf1/Satb1/Zfp148/Mxd4/Nfkb1/Zkscan3/Nfatc3/Bcl11a/Nfatc1/Zbtb20/Irf8/Zbtb18	GO Molecular Function
B cells	GO:0004129	cytochrome-c oxidase activity	10	0.905731	1.82323	0.000111424	0.00640686	0.00569499	371	tags=80%, list=5%, signal=76%	Cox8a/Cox6c/Cox7b/Cox7a2/Cox7c/Cox5a/Cox4i1/Cox7a2l	GO Molecular Function
B cells	GO:1990948	ubiquitin ligase inhibitor activity	7	0.945782	1.76801	0.000102441	0.00640686	0.00569499	349	tags=86%, list=5%, signal=81%	Rps7/Rpl11/Rpl37/Rps20/Rpl23/Rpl5	GO Molecular Function
B cells	mmu05332	Graft-versus-host disease - Mus musculus (house mouse)	20	0.788828	1.79912	0.000647221	0.00739681	0.00622889	319	tags=45%, list=5%, signal=43%	H2-Eb1/H2-Ab1/H2-Aa/H2-D1/H2-DMa/H2-DMb2/H2-Oa/H2-T23/H2-Q4	Kegg Pathway
B cells	GO:0007623	circadian rhythm	89	-0.407685	-1.72198	7.92251e-05	0.00748317	0.00704985	670	tags=26%, list=10%, signal=24%	Nono/Bhlhe40/Csnk1d/Cipc/Clock/Hdac2/Rbm4/Ppp1cb/Ddb1/Gfpt1/Usp9x/Nampt/Creb1/Pten/Usp7/Kdm2a/Atf4/Ube3a/Ep300/Ogt/Sfpq/Tardbp/Mat2a	GO Biological Process
B cells	GO:1901137	carbohydrate derivative biosynthetic process	277	0.512546	1.41517	7.84006e-05	0.00748317	0.00704985	982	tags=25%, list=14%, signal=22%	Nme2/Atp5g1/Aldoa/Itm2b/Dad1/Atp5g2/Eno1/Atp5j2/Ndufa13/Ndufa11/Krtcap2/Atp5d/Ndufa7/Ost4/Atp5j/Atp5c1/Atp5e/Ndufa12/Ndufs4/Dpm1/Atp5b/Ndufb7/Ndufs8/Atp5o/Tmem258/Pkm/Ndufb11/Nme1/Atp5h/Ndufb4/Ndufb5/Ndufb8/Ndufv2/Sdhb/Ndufs5/Ndufa3/Ndufv3/Dpm3/Ndufa5/Tpi1/Atp5k/Mpc2/Ndufc2/Ndufb9/Mpc1/Ndufa1/Ostc/Atp5l/Ndufa8/Ndufb2/Hprt/Ndufs3/Dguok/Aprt/Ndufs7/Ndufc1/Bcl2/Cmpk1/St8sia4/Tmem59/Ndufb3/Alg5/Ndufa…	GO Biological Process
B cells	GO:0060828	regulation of canonical Wnt signaling pathway	98	-0.402911	-1.80045	9.51329e-05	0.00840052	0.00791409	1180	tags=37%, list=17%, signal=31%	Notch1/Ubr5/Ccdc88c/Ctdnep1/Usp47/Tnks/Hdac1/Csnk1g1/Ddit3/Gsk3a/Chd8/Tbl1xr1/Foxo3/Invs/Vcp/Slc9a3r1/Csnk1d/Foxo1/Jade1/Lats1/Csnk1a1/Hdac2/Amfr/Prdm15/G3bp1/Zfp703/Tnks2/Limd1/Ctnnb1/Mapk14/Xiap/Nfkb1/Wnk1/Ddx3x/Apoe/Tle3	GO Biological Process
B cells	GO:2000319	regulation of T-helper 17 cell differentiation	8	-0.876488	-2.10163	0.000105342	0.00889762	0.0083824	540	tags=50%, list=8%, signal=46%	Nfkbid/Rc3h1/Rc3h2/Malt1	GO Biological Process
B cells	GO:0051444	negative regulation of ubiquitin-protein transferase activity	13	0.855167	1.76071	0.000105092	0.00889762	0.0083824	349	tags=38%, list=5%, signal=37%	Rps7/Rpl11/Park7/Rpl23/Rpl5	GO Biological Process
B cells	mmu05140	Leishmaniasis - Mus musculus (house mouse)	44	0.662175	1.66365	0.000936412	0.0103328	0.00870132	355	tags=27%, list=5%, signal=26%	H2-Eb1/Cyba/H2-Ab1/H2-Aa/H2-DMa/H2-DMb2/Jun/Eef1a1/Fos/H2-Oa/Nfkbia/Ncf4	Kegg Pathway
B cells	GO:2000343	positive regulation of chemokine (C-X-C motif) ligand 2 production	6	0.947007	1.68738	0.000127383	0.0106056	0.00999146	167	tags=50%, list=2%, signal=49%	Cd74/Mif/Hmgb1	GO Biological Process
B cells	mmu05416	Viral myocarditis - Mus musculus (house mouse)	40	0.683839	1.71081	0.000999519	0.0106615	0.00897814	340	tags=30%, list=5%, signal=29%	H2-Eb1/H2-Ab1/H2-Aa/H2-D1/H2-DMa/H2-DMb2/Rac2/Actb/H2-Oa/H2-T23/H2-Q4/Cd55	Kegg Pathway
B cells	GO:0023026	MHC class II protein complex binding	11	0.890446	1.82474	0.000253323	0.0119177	0.0105935	258	tags=64%, list=4%, signal=61%	H2-Eb1/H2-Ab1/H2-Aa/Cd74/H2-DMa/H2-DMb2/H2-Oa	GO Molecular Function
B cells	mmu04213	Longevity regulating pathway - multiple species - Mus musculus (house mouse)	33	-0.546392	-1.97278	0.00117036	0.0120811	0.0101736	1166	tags=42%, list=17%, signal=35%	Insr/Hdac1/Pik3ca/Adcy7/Pik3r1/Foxo3/Irs2/Foxo1/Eif4ebp2/Hdac2/Cat/Rps6kb1/Sod1/Hspa8	Kegg Pathway
B cells	mmu00350	Tyrosine metabolism - Mus musculus (house mouse)	7	0.895799	1.66432	0.00141445	0.0141445	0.0119111	548	tags=43%, list=8%, signal=39%	Il4i1/Mif/Adh5	Kegg Pathway
B cells	mmu05310	Asthma - Mus musculus (house mouse)	11	0.85043	1.73302	0.0014918	0.0144659	0.0121818	257	tags=55%, list=4%, signal=53%	H2-Eb1/H2-Ab1/H2-Aa/H2-DMa/H2-DMb2/H2-Oa	Kegg Pathway
B cells	GO:0008013	beta-catenin binding	35	-0.559186	-2.06474	0.000367102	0.0158313	0.0140722	1124	tags=37%, list=16%, signal=31%	Dvl1/Bcl9l/Chd8/Tbl1xr1/Foxo3/Slc9a3r1/Kdm6b/Pxn/Foxo1/Tcf4/Ptprj/Ctnnb1/Ep300	GO Molecular Function
B cells	GO:1902931	negative regulation of alcohol biosynthetic process	6	-0.919678	-1.99298	0.000202539	0.016104	0.0151715	97	tags=50%, list=1%, signal=49%	Nfkb1/Apoe/Sod1	GO Biological Process
B cells	GO:0072567	chemokine (C-X-C motif) ligand 2 production	9	0.900011	1.73493	0.000204477	0.016104	0.0151715	167	tags=33%, list=2%, signal=33%	Cd74/Mif/Hmgb1	GO Biological Process
B cells	GO:0048156	tau protein binding	14	-0.755487	-2.18507	0.000435385	0.0172664	0.0153479	558	tags=29%, list=8%, signal=26%	Mark2/Fkbp4/Apoe/Hsp90aa1	GO Molecular Function
B cells	mmu04940	Type I diabetes mellitus - Mus musculus (house mouse)	22	0.740817	1.71733	0.0019212	0.0180819	0.0152269	319	tags=41%, list=5%, signal=39%	H2-Eb1/H2-Ab1/H2-Aa/H2-D1/H2-DMa/H2-DMb2/H2-Oa/H2-T23/H2-Q4	Kegg Pathway
B cells	mmu05323	Rheumatoid arthritis - Mus musculus (house mouse)	35	0.691892	1.70219	0.00217976	0.0199292	0.0167825	677	tags=40%, list=10%, signal=36%	H2-Eb1/H2-Ab1/H2-Aa/H2-DMa/Ltb/H2-DMb2/Jun/Atp6v0e/Fos/H2-Oa/Atp6v1f/Atp6v0c/Atp6v1g1/H2-Ob	Kegg Pathway
B cells	GO:0070003	threonine-type peptidase activity	12	0.84357	1.75253	0.000593577	0.0199822	0.0177619	443	tags=75%, list=6%, signal=70%	Psmb8/Psmb2/Psmb3/Psmb1/Psmb6/Psma4/Psmb5/Psmb10/Psmb9	GO Molecular Function
B cells	GO:0010721	negative regulation of cell development	62	-0.446484	-1.72826	0.000260368	0.0202323	0.0190608	584	tags=26%, list=8%, signal=24%	Kdm4a/Hook3/Ppp3ca/Rb1/Arhgef2/Ski/Dicer1/Pten/Rufy3/Ctnnb1/Ywhah/Gdi1/Sema7a/Bcl11a/Cd24a/S1pr3	GO Biological Process
B cells	mmu05321	Inflammatory bowel disease - Mus musculus (house mouse)	24	0.715428	1.66848	0.00237626	0.0211223	0.0177872	328	tags=33%, list=5%, signal=32%	H2-Eb1/H2-Ab1/H2-Aa/H2-DMa/H2-DMb2/Jun/H2-Oa/Il2rg	Kegg Pathway
B cells	GO:0004601	peroxidase activity	18	0.782071	1.75363	0.000691199	0.0216785	0.0192698	1148	tags=78%, list=17%, signal=65%	Hba-a1/Hbb-bt/Park7/Prdx1/Gpx4/Selenof/Gstp1/Prdx2/Prdx5/Txndc17/Prdx4/Prdx3/Prdx6/Gpx1	GO Molecular Function
B cells	GO:0072332	intrinsic apoptotic signaling pathway by p53 class mediator	52	0.662219	1.69284	0.000292343	0.0224181	0.0211199	287	tags=17%, list=4%, signal=17%	Ubb/Rps7/Rpl11/Rpl26/Cd74/Mif/Hint1/Pycard/Bax	GO Biological Process
B cells	GO:0010001	glial cell differentiation	83	-0.395946	-1.64886	0.000328976	0.0245804	0.023157	1180	tags=34%, list=17%, signal=28%	Notch1/Mapk1/Exoc4/B4galt5/Hdac1/Slc25a46/Cxcr4/Mbd1/Grn/Clcf1/Suz12/Kdm4a/Nrros/Hdac2/Ppp3r1/Ski/Nab1/Dicer1/Pten/Wdr1/Ptprj/Stat3/Ctnnb1/Grk2/Dtx1/Sod1/S100a9/S100a8	GO Biological Process
B cells	GO:0072539	T-helper 17 cell differentiation	16	-0.712635	-2.15414	0.00034455	0.0254148	0.0239431	540	tags=38%, list=8%, signal=35%	Nfkbid/Rc3h1/Rc3h2/Stat3/Irf4/Malt1	GO Biological Process
B cells	GO:0051216	cartilage development	54	-0.457502	-1.76313	0.000353226	0.0254148	0.0239431	883	tags=54%, list=13%, signal=47%	Chsy1/Tgfb1/Carm1/Atf2/Rela/Mia3/Srf/Mapk3/Glg1/Tgfbr2/Esrra/Runx1/Mex3c/Smad5/Pkd1/Zbtb7a/Trps1/Creb3l2/Rb1/Twsg1/Dicer1/Pbxip1/Ctnnb1/Mapk14/Hif1a/Runx3/Mef2d/Ep300/Cr2	GO Biological Process
B cells	GO:0070972	protein localization to endoplasmic reticulum	54	0.651373	1.66694	0.0003733	0.026212	0.0246942	947	tags=35%, list=14%, signal=31%	Sec61g/Naca/Btf3/Spcs2/Gabarapl2/Chmp4b/Sec61b/Bcap31/Sec62/Srp9/Ddrgk1/Rer1/Srp14/Os9/Bcap29/Ppp1r15a/Spcs1/Vapa/Macf1	GO Biological Process
B cells	GO:0035924	cellular response to vascular endothelial growth factor stimulus	19	-0.693785	-2.23778	0.000405602	0.0275864	0.025989	1649	tags=68%, list=24%, signal=52%	Pik3cd/Rela/Map2k3/Nrp2/Notch1/Pik3ca/Prkd2/Tcf4/Xbp1/Nr4a1/Nus1/Mapk14/Egr3	GO Biological Process
B cells	GO:0050768	negative regulation of neurogenesis	53	-0.453005	-1.73119	0.000411808	0.0275864	0.025989	584	tags=28%, list=8%, signal=26%	Kdm4a/Hook3/Ppp3ca/Rb1/Arhgef2/Ski/Dicer1/Pten/Rufy3/Ctnnb1/Ywhah/Gdi1/Sema7a/Bcl11a/Cd24a	GO Biological Process
B cells	GO:0051961	negative regulation of nervous system development	53	-0.453005	-1.73119	0.000411808	0.0275864	0.025989	584	tags=28%, list=8%, signal=26%	Kdm4a/Hook3/Ppp3ca/Rb1/Arhgef2/Ski/Dicer1/Pten/Rufy3/Ctnnb1/Ywhah/Gdi1/Sema7a/Bcl11a/Cd24a	GO Biological Process
B cells	GO:0007005	mitochondrion organization	319	0.491724	1.35925	0.000398731	0.0275864	0.025989	1494	tags=37%, list=22%, signal=30%	Park7/Micos13/Ndufa11/Atp5d/Jun/Cox7a2/Slc25a4/Ndufa12/Tspo/Prelid1/Pycard/Gabarapl2/Chchd2/Fundc2/Ndufs4/Map1lc3b/Bax/Tomm7/Ndufb7/Ndufs8/Ndufb11/Ndufb4/Tomm22/Ndufb5/Fis1/Ndufb8/Ssbp1/Cox7a2l/Chchd10/Ndufs5/Ndufa3/Ndufa5/Atpif1/Bcap31/Vdac2/Grpel1/Gabarap/Ndufc2/Pdcd5/Ndufb9/Slc25a5/Phb2/Timm23/Coa3/Gimap5/Ndufa1/Timm13/Mrpl17/Ndufa8/Ndufb2/Ndufs3/Dnajc15/Mrpl15/Higd2a/Sdhaf4/Plaur/Phb/Casp1/Ti…	GO Biological Process
B cells	GO:2000316	regulation of T-helper 17 type immune response	13	-0.749257	-2.113	0.000438005	0.0287466	0.027082	540	tags=31%, list=8%, signal=28%	Nfkbid/Rc3h1/Rc3h2/Malt1	GO Biological Process
B cells	GO:0032309	icosanoid secretion	6	0.927591	1.65278	0.000441543	0.0287466	0.027082	175	tags=33%, list=3%, signal=33%	Mif/Atp5j	GO Biological Process
B cells	GO:0031386	protein tag	11	0.864804	1.77219	0.00101135	0.0289344	0.0257194	633	tags=73%, list=9%, signal=66%	Ubb/Uba52/Rps27a/Sumo2/Ubl5/Nedd8/Ubc/Sumo1	GO Molecular Function
B cells	GO:0042605	peptide antigen binding	15	0.795853	1.73825	0.00103437	0.0289344	0.0257194	322	tags=40%, list=5%, signal=38%	H2-Eb1/H2-Ab1/H2-Aa/H2-D1/H2-T23/H2-Q4	GO Molecular Function
B cells	GO:0002399	MHC class II protein complex assembly	10	0.879083	1.7219	0.000481629	0.0301821	0.0284344	258	tags=60%, list=4%, signal=58%	H2-Eb1/H2-Ab1/H2-Aa/H2-DMa/H2-DMb2/H2-Oa	GO Biological Process
B cells	GO:0002503	peptide antigen assembly with MHC class II protein complex	10	0.879083	1.7219	0.000481629	0.0301821	0.0284344	258	tags=60%, list=4%, signal=58%	H2-Eb1/H2-Ab1/H2-Aa/H2-DMa/H2-DMb2/H2-Oa	GO Biological Process
B cells	GO:0006109	regulation of carbohydrate metabolic process	76	-0.412071	-1.61301	0.00051569	0.0314909	0.0296674	1251	tags=38%, list=18%, signal=32%	Midn/Cltc/Insr/Maea/Foxk1/Wdr5/Ppp4r3a/Prkce/Epm2aip1/Dyrk2/Zbtb7a/Cd36/Nr3c1/Irs2/Foxo1/Myc/Ppp1cb/Kat2b/Ddb1/Ppp4r3b/Gfpt1/Usp7/Stat3/Hif1a/Nfkb1/Zbtb20/Ep300/Ogt/Cbfa2t3	GO Biological Process
B cells	mmu04936	Alcoholic liver disease - Mus musculus (house mouse)	67	-0.392144	-1.64604	0.00397171	0.0343499	0.0289263	1007	tags=25%, list=15%, signal=22%	Traf3/Ikbke/Srebf1/Chuk/Foxo3/Irak1/Ticam1/Fasn/Foxo1/Il17ra/Tra2a/Ctnnb1/Mapk14/Nfkb1/Tab2/Scd1/Scd2	Kegg Pathway
B cells	GO:0034341	response to interferon-gamma	69	0.611528	1.60081	0.000584286	0.0347471	0.0327351	797	tags=25%, list=12%, signal=22%	H2-Eb1/H2-Ab1/H2-Aa/Gapdh/Cd74/Capg/Vim/Rpl13a/Cd47/Nmi/Vamp8/Stx8/Casp1/Bst2/Ciita/Cdc37/Eprs	GO Biological Process
B cells	mmu04612	Antigen processing and presentation - Mus musculus (house mouse)	45	0.624142	1.57499	0.00453882	0.0382216	0.0321866	319	tags=31%, list=5%, signal=30%	H2-Eb1/H2-Ab1/Ifi30/H2-Aa/Cd74/H2-D1/H2-DMa/H2-DMb2/Ctss/Psme1/H2-Oa/Psme2/H2-T23/H2-Q4	Kegg Pathway
B cells	GO:0070988	demethylation	40	-0.514161	-1.85748	0.000662393	0.0389942	0.0367363	677	tags=35%, list=10%, signal=32%	Kdm6b/Syncrip/Jmjd6/Fto/Kdm4a/Tet3/Phf8/Kdm2b/Otud4/Usp9x/Trim28/Usp7/Kdm2a/Alkbh5	GO Biological Process
B cells	mmu04390	Hippo signaling pathway - Mus musculus (house mouse)	50	-0.409886	-1.60163	0.00497206	0.0407964	0.0343548	1153	tags=36%, list=17%, signal=30%	Tgfbr2/Dvl2/Dvl1/Ppp2r1a/Scrib/Mob1b/Csnk1d/Lats1/Myc/Ywhae/Ppp1cb/Ywhaz/Limd1/Ywhag/Ccnd2/Ctnnb1/Ywhah/Mob1a	Kegg Pathway
B cells	mmu04330	Notch signaling pathway - Mus musculus (house mouse)	35	-0.469302	-1.71926	0.00517554	0.0408669	0.0344142	1152	tags=43%, list=17%, signal=36%	Notch1/Dvl2/Dvl1/Itch/Hdac1/Spen/Adam17/Crebbp/Hdac2/Dtx3l/Kat2b/Atxn1/Ep300/Tle3/Dtx1	Kegg Pathway
B cells	mmu00562	Inositol phosphate metabolism - Mus musculus (house mouse)	40	-0.445982	-1.64933	0.00523607	0.0408669	0.0344142	1707	tags=45%, list=25%, signal=34%	Pip4k2c/Pik3cd/Pik3c3/Plcb2/Pip5k1a/Plcg1/Inpp5d/Cdipt/Pik3ca/Inpp4a/Mtmr3/Pikfyve/Pik3c2b/Itpkb/Pten/Pip4k2b/Mtmr4/Pip4k2a	Kegg Pathway
B cells	GO:0010894	negative regulation of steroid biosynthetic process	7	-0.870396	-1.94431	0.0007631	0.0440332	0.0414834	97	tags=43%, list=1%, signal=42%	Nfkb1/Apoe/Sod1	GO Biological Process
B cells	GO:0045939	negative regulation of steroid metabolic process	7	-0.870396	-1.94431	0.0007631	0.0440332	0.0414834	97	tags=43%, list=1%, signal=42%	Nfkb1/Apoe/Sod1	GO Biological Process
B cells	GO:1902600	proton transmembrane transport	36	0.70832	1.7294	0.000787719	0.0450081	0.0424019	698	tags=39%, list=10%, signal=35%	Atp5g1/Atp5g2/Park7/Atp5d/Ndufa4/Slc25a4/Atp6v0e/Rnasek/Atp6v1f/Atp5b/Phb2/Atp6v0c/Atp6v1g1/Ndufs7	GO Biological Process
B cells	GO:0019209	kinase activator activity	51	-0.440224	-1.7193	0.00169379	0.0461334	0.0410075	268	tags=20%, list=4%, signal=19%	Irgm1/Cab39/Ccnt2/Dazap2/Wnk1/Ddx3x/Cd24a/Mob1a/Malt1/Ltf	GO Molecular Function
B cells	mmu05215	Prostate cancer - Mus musculus (house mouse)	50	-0.402112	-1.57125	0.00615802	0.0469183	0.0395101	984	tags=42%, list=15%, signal=36%	Mapk1/Sos2/Pdpk1/Mdm2/Pik3ca/Chuk/Pik3r1/Hsp90b1/Creb3l2/E2f2/Crebbp/Rb1/Foxo1/Creb1/Pten/Ctnnb1/Atf4/Araf/Nfkb1/Ep300/Hsp90aa1	Kegg Pathway
B cells	mmu04514	Cell adhesion molecules - Mus musculus (house mouse)	43	0.638917	1.60417	0.00674877	0.0490819	0.0413322	319	tags=26%, list=5%, signal=25%	H2-Eb1/H2-Ab1/H2-Aa/H2-D1/H2-DMa/H2-DMb2/Cd2/H2-Oa/Sell/H2-T23/H2-Q4	Kegg Pathway
B cells	mmu05161	Hepatitis B - Mus musculus (house mouse)	102	-0.32044	-1.32676	0.00673173	0.0490819	0.0413322	1260	tags=38%, list=19%, signal=32%	Stat1/Casp9/Apaf1/Nfatc2/Mapk8/Tgfbr2/Mapk1/Sos2/Traf3/Ikbke/Pik3ca/Chuk/Pik3r1/Stat6/Atp6ap1/Irak1/Pcna/Ticam1/Creb3l2/E2f2/Crebbp/Rb1/Myc/Ddb1/Prkcb/Ywhaz/Creb1/Mavs/Stat3/Atf4/Araf/Mapk14/Nfkb1/Egr3/Ddx3x/Nfatc3/Nfatc1/Tab2/Ep300	Kegg Pathway
B cells	mmu04640	Hematopoietic cell lineage - Mus musculus (house mouse)	33	0.67076	1.63862	0.0070246	0.0499527	0.0420654	1036	tags=52%, list=15%, signal=44%	H2-Eb1/H2-Ab1/H2-Aa/H2-DMa/Cd37/H2-DMb2/Cd2/H2-Oa/Cd55/Fcer2a/Cd9/H2-Ob/Itga4/Il9r/Cd22/Cd38/Cr1l	Kegg Pathway

## Sheet: CD4+ memory T_pathway
ClusterID	ID	Description	setSize	enrichmentScore	NES	pvalue	p.adjust	qvalue	rank	leading_edge	core_enrichment	PathwayDB
CD4+ memory T	mmu03010	Ribosome - Mus musculus (house mouse)	124	0.842354	2.31541	1e-10	2.67174e-09	2.29019e-09	419	tags=61%, list=7%, signal=58%	Uba52/Rpl10/Rps15a/Rpl15/Rps18/Rps11/Rplp0/Rpl32/Rpl11/Rpl34/Rps7/Rps3/Rpl21/Rps2/Rpl24/Rpl9/Rpl36/Rpl28/Rpl35/Rpl14/Rpl26/Fau/Rps5/Rpl8/Rps4x/Rpl39/Rpl13/Rpl3/Rpl19/Rpl10a/Rpl6/Rps10/Rpl17/Rps27a/Rpl12/Rpl18a/Rps13/Rpl22l1/Rpl18/Rpl27a/Rpl29/Rpl37/Rps16/Rps27/Rps23/Rpsa/Rpl30/Rps24/Rps29/Rps21/Rpl7/Rpl23/Rpl36al/Rpl7a/Rpl38/Rpl27/Rps20/Rpl13a/Rps3a1/Rps14/Rps25/Rps19/Rpl36a/Rps6/Rpl22/Rpl5/Rps8/…	Kegg Pathway
CD4+ memory T	mmu05171	Coronavirus disease - COVID-19 - Mus musculus (house mouse)	135	0.838175	2.31295	1e-10	2.67174e-09	2.29019e-09	464	tags=57%, list=8%, signal=54%	Uba52/Rpl10/Rps15a/Rpl15/Rps18/Rps11/Rplp0/Rpl32/Rpl11/Rpl34/Rps7/Rps3/Rpl21/Rps2/Rpl24/Rpl9/Rpl36/Rpl28/Rpl35/Rpl14/Rpl26/Fau/Rps5/Rpl8/Rps4x/Rpl39/Rpl13/Rpl3/Rpl19/Nfkbia/Rpl10a/Rpl6/Rps10/Rpl17/Rps27a/Rpl12/Rpl18a/Rps13/Rpl22l1/Rpl18/Rpl27a/Rpl29/Rpl37/Rps16/Rps27/Rps23/Rpsa/Rpl30/Rps24/Rps29/Rps21/Rpl7/Rpl23/Rpl36al/Rpl7a/Rpl38/Rpl27/Rps20/Rpl13a/Rps3a1/Rps14/Cxcl10/Rps25/Rps19/Rpl36a/Rps6/Rp…	Kegg Pathway
CD4+ memory T	mmu00190	Oxidative phosphorylation - Mus musculus (house mouse)	94	0.765356	2.06595	1e-10	2.67174e-09	2.29019e-09	882	tags=68%, list=15%, signal=59%	Cox8a/Atp5g1/Ndufa13/Cox5b/Cox7b/Cox6c/Atp5j2/Atp5d/Atp5g2/Atp5j/Ndufa7/Uqcrb/Cox7c/Cox7a2/Atp5c1/Cox6b1/Atp5e/Ndufv3/Uqcr10/Atp5h/Atp5l/Atp6v0e/Atp5b/Atp5o/Ndufa4/Ndufa3/Cox5a/Atp6v1f/Cox4i1/Ndufb7/Ndufb4/Atp5k/Ndufa1/Ndufa12/Ndufb8/Ndufa2/Ndufa11/Ndufb11/Ndufb9/Ndufa5/Sdhb/Ndufs4/Ndufa8/Cox7a2l/Ndufs5/Ndufv2/Atp6v0c/Ndufb5/Uqcrq/Ndufc2/Uqcr11/Atp6v1g1/Ndufs7/Ndufb2/Ndufb10/Ndufb6/Ndufs3/Ndufs8/…	Kegg Pathway
CD4+ memory T	mmu05012	Parkinson disease - Mus musculus (house mouse)	173	0.72648	2.03279	1e-10	2.67174e-09	2.29019e-09	903	tags=55%, list=15%, signal=48%	Ubb/Uba52/Cox8a/Rps27a/Atp5g1/Ndufa13/Cox5b/Cox7b/Cox6c/Atp5d/Atp5g2/Atp5j/Ndufa7/Park7/Uqcrb/Psma2/Cox7c/Calm1/Cox7a2/Atp5c1/Cox6b1/Psmb1/Atp5e/Ndufv3/Txn1/Uqcr10/Atp5h/Atp5b/Slc25a4/Atp5o/Psmb3/Ndufa4/Psmb2/Ndufa3/Cox5a/Cox4i1/Ubc/Ndufb7/Psmb6/Ndufb4/Psma3/Psmb5/Psma7/Gnai2/Bax/Ndufa1/Ndufa12/Ndufb8/Ndufa2/Ndufa11/Psma4/Ndufb11/Ndufb9/Ndufa5/Psmd4/Sdhb/Ndufs4/Ndufa8/Cox7a2l/Ndufs5/Calm2/Ndufv2/…	Kegg Pathway
CD4+ memory T	mmu05415	Diabetic cardiomyopathy - Mus musculus (house mouse)	126	0.704072	1.93775	1e-10	2.67174e-09	2.29019e-09	1136	tags=61%, list=19%, signal=50%	Gapdh/Cyba/Cox8a/Atp5g1/Ndufa13/Cox5b/Cox7b/Cox6c/Rac2/Atp5d/Atp5g2/Atp5j/Ndufa7/Uqcrb/Cox7c/Cox7a2/Atp5c1/Cox6b1/Atp5e/Ndufv3/Uqcr10/Atp5h/Atp5b/Slc25a4/Atp5o/Ndufa4/Ndufa3/Cox5a/Cox4i1/Ndufb7/Ndufb4/Ndufa1/Ndufa12/Ndufb8/Ndufa2/Ndufa11/Ndufb11/Ndufb9/Ndufa5/Sdhb/Ndufs4/Ndufa8/Cox7a2l/Ndufs5/Ndufv2/Ndufb5/Uqcrq/Prkca/Ndufc2/Uqcr11/Ppp1ca/Slc25a5/Mpc2/Ndufs7/Ndufb2/Ndufb10/Ndufb6/Vdac2/Ndufs3/Ndu…	Kegg Pathway
CD4+ memory T	mmu05016	Huntington disease - Mus musculus (house mouse)	193	0.685514	1.91916	1e-10	2.67174e-09	2.29019e-09	1087	tags=54%, list=18%, signal=45%	Cox8a/Atp5g1/Ndufa13/Cox5b/Cox7b/Cox6c/Atp5d/Atp5g2/Atp5j/Ndufa7/Uqcrb/Psma2/Cox7c/Cox7a2/Atp5c1/Cox6b1/Psmb1/Atp5e/Ndufv3/Uqcr10/Atp5h/Atp5b/Slc25a4/Atp5o/Psmb3/Ndufa4/Psmb2/Clta/Ndufa3/Cox5a/Cox4i1/Ndufb7/Psmb6/Ndufb4/Psma3/Psmb5/Psma7/Bax/Ndufa1/Ndufa12/Ndufb8/Ndufa2/Ndufa11/Psma4/Ndufb11/Ndufb9/Ndufa5/Psmd4/Sdhb/Ndufs4/Ndufa8/Cox7a2l/Ndufs5/Ndufv2/Polr2e/Psmd8/Ndufb5/Polr2j/Uqcrq/Psmd12/Ndufc…	Kegg Pathway
CD4+ memory T	mmu04714	Thermogenesis - Mus musculus (house mouse)	131	0.688332	1.89514	1.04433e-10	2.67174e-09	2.29019e-09	1161	tags=59%, list=20%, signal=48%	Cox8a/Atp5g1/Ndufa13/Cox5b/Cox7b/Cox6c/Atp5j2/Atp5d/Atp5g2/Atp5j/Ndufa7/Uqcrb/Cox7c/Cox7a2/Atp5c1/Cox6b1/Atp5e/Ndufv3/Uqcr10/Atp5h/Actb/Atp5l/Atp5b/Atp5o/Rps6/Ndufa4/Ndufa3/Cox5a/Cox4i1/Ndufb7/Ndufb4/Atp5k/Ndufa1/Ndufa12/Ndufb8/Ndufa2/Ndufa11/Ndufb11/Ndufb9/Ndufa5/Sdhb/Ndufs4/Ndufa8/Cox7a2l/Ndufs5/Ndufv2/Ndufb5/Uqcrq/Ndufc2/Uqcr11/Coa3/Cox20/Ndufs7/Ndufb2/Ndufb10/Ndufb6/Ndufs3/Ndufs8/Ndufc1/Kras/…	Kegg Pathway
CD4+ memory T	mmu05208	Chemical carcinogenesis - reactive oxygen species - Mus musculus (house mouse)	138	0.680368	1.88027	1e-10	2.67174e-09	2.29019e-09	887	tags=51%, list=15%, signal=44%	Cyba/Cox8a/Nfkbia/Atp5g1/Ndufa13/Cox5b/Cox7b/Cox6c/Atp5d/Atp5g2/Atp5j/Ndufa7/Uqcrb/Cox7c/Cox7a2/Atp5c1/Cox6b1/Atp5e/Ndufv3/Uqcr10/Atp5h/Atp5b/Slc25a4/Atp5o/Ndufa4/Ndufa3/Cox5a/Cox4i1/Ndufb7/Ndufb4/Ndufa1/Ndufa12/Ndufb8/Ndufa2/Ndufa11/Ndufb11/Ndufb9/Ndufa5/Sdhb/Ndufs4/Ndufa8/Cox7a2l/Ndufs5/Ndufv2/Ndufb5/Uqcrq/Ndufc2/Uqcr11/Slc25a5/Ndufs7/Jun/Ndufb2/Akr1a1/Ndufb10/Ndufb6/Fos/Vdac2/Ndufs3/Ptpn1/Nduf…	Kegg Pathway
CD4+ memory T	mmu05020	Prion disease - Mus musculus (house mouse)	172	0.670308	1.87556	1e-10	2.67174e-09	2.29019e-09	903	tags=52%, list=15%, signal=46%	Cyba/Cox8a/Atp5g1/Ndufa13/Cox5b/Cox7b/Cox6c/Rac2/Atp5d/Atp5g2/Ccl5/Atp5j/Ndufa7/Uqcrb/Psma2/Cox7c/Cox7a2/Atp5c1/Cox6b1/Psmb1/Atp5e/Ndufv3/Uqcr10/Atp5h/Atp5b/Slc25a4/Atp5o/Psmb3/Ndufa4/Psmb2/Ndufa3/Cox5a/Cox4i1/Ndufb7/Psmb6/Ndufb4/Psma3/Psmb5/Psma7/Bax/Ndufa1/Ndufa12/Ndufb8/Ndufa2/Ndufa11/Psma4/Ndufb11/Ndufb9/Ndufa5/Psmd4/Sdhb/Ndufs4/Ndufa8/Cox7a2l/Ndufs5/Ndufv2/Psmd8/Ndufb5/Uqcrq/Psmd12/Ndufc2/Uq…	Kegg Pathway
CD4+ memory T	mmu05010	Alzheimer disease - Mus musculus (house mouse)	218	0.640206	1.79336	1e-10	2.67174e-09	2.29019e-09	903	tags=41%, list=15%, signal=36%	Gapdh/Cox8a/Atp5g1/Ndufa13/Cox5b/Cox7b/Cox6c/Atp5d/Atp5g2/Atp5j/Ndufa7/Uqcrb/Psma2/Cox7c/Calm1/Cox7a2/Atp5c1/Cox6b1/Psmb1/Atp5e/Ndufv3/Uqcr10/Atp5h/Atp5b/Slc25a4/Atp5o/Psmb3/Ndufa4/Psmb2/Ndufa3/Cox5a/Cox4i1/Ndufb7/Psmb6/Ndufb4/Psma3/Psmb5/Psma7/Psenen/Ndufa1/Ndufa12/Ndufb8/Ndufa2/Ndufa11/Psma4/Ndufb11/Ndufb9/Ndufa5/Psmd4/Sdhb/Ndufs4/Ndufa8/Cox7a2l/Ndufs5/Calm2/Ndufv2/Psmd8/Ndufb5/Uqcrq/Psmd12/Hsd…	Kegg Pathway
CD4+ memory T	mmu05014	Amyotrophic lateral sclerosis - Mus musculus (house mouse)	220	0.635874	1.78051	1e-10	2.67174e-09	2.29019e-09	1136	tags=49%, list=19%, signal=41%	Cox8a/Pfn1/Atp5g1/Ndufa13/Cox5b/Cox7b/Cox6c/Atp5d/Atp5g2/Atp5j/Ndufa7/Uqcrb/Psma2/Cox7c/Cox7a2/Atp5c1/Cox6b1/Psmb1/Atp5e/Ndufv3/Uqcr10/Atp5h/Actb/Atp5b/Hnrnpa1/Atp5o/Psmb3/Ndufa4/Psmb2/Ndufa3/Cox5a/Cox4i1/Ndufb7/Map1lc3b/Psmb6/Ndufb4/Psma3/Psmb5/Psma7/Bax/Ndufa1/Ndufa12/Ndufb8/Ndufa2/Ndufa11/Tpr/Psma4/Hnrnpa3/Ndufb11/Ndufb9/Ndufa5/Psmd4/Sdhb/Ndufs4/Ndufa8/Cox7a2l/Ndufs5/Ndufv2/Psmd8/Ndufb5/Uqcrq/…	Kegg Pathway
CD4+ memory T	mmu05022	Pathways of neurodegeneration - multiple diseases - Mus musculus (house mouse)	260	0.632982	1.78016	1e-10	2.67174e-09	2.29019e-09	1136	tags=45%, list=19%, signal=38%	Ubb/Uba52/Cox8a/Rps27a/Atp5g1/Ndufa13/Cox5b/Cox7b/Cox6c/Atp5d/Atp5g2/Atp5j/Ndufa7/Park7/Uqcrb/Psma2/Cox7c/Calm1/Cox7a2/Atp5c1/Cox6b1/Psmb1/Atp5e/Ndufv3/Uqcr10/Atp5h/Atp5b/Slc25a4/Atp5o/Psmb3/Ndufa4/Psmb2/Ndufa3/Cox5a/Cox4i1/Ubc/Ndufb7/Map1lc3b/Psmb6/Ndufb4/Psma3/Psmb5/Psma7/Bax/Ndufa1/Ndufa12/Ndufb8/Ndufa2/Ndufa11/Psma4/Ndufb11/Ndufb9/Ndufa5/Psmd4/Sdhb/Ndufs4/Ndufa8/Cox7a2l/Ndufs5/Calm2/Ndufv2/Ps…	Kegg Pathway
CD4+ memory T	GO:0002181	cytoplasmic translation	122	0.847208	2.35089	1e-10	3.17722e-08	2.95848e-08	495	tags=61%, list=8%, signal=58%	Uba52/Rps15a/Rpl15/Rps18/Rps11/Rplp0/Rpl32/Rpl11/Rpl34/Rps7/Rps3/Rpl21/Rps2/Rpl24/Rpl9/Rpl36/Rpl28/Rpl14/Rpl26/Fau/Rps5/Rpl8/Rps4x/Rpl39/Rpl13/Rpl3/Rpl19/Rpl10a/Rpl6/Rps10/Rpl17/Rps27a/Rpl12/Rpl18a/Rps13/Rpl22l1/Rpl18/Rpl27a/Rpl29/Rps16/Rps23/Rpsa/Rpl30/Rps24/Rps29/Rps21/Rpl7/Rpl23/Rpl7a/Rpl38/Rpl27/Pkm/Rps20/Rpl13a/Rps3a1/Rps14/Rps25/Rps19/Hnrnpd/Rpl36a/Eif3m/Rps6/Rpl22/Rpl5/Eif3i/Rps8/Rplp1/Rps…	GO Biological Process
CD4+ memory T	GO:0006119	oxidative phosphorylation	87	0.76584	2.09175	1e-10	3.17722e-08	2.95848e-08	1267	tags=79%, list=21%, signal=64%	Ndufa13/Cox5b/Atp5j2/Atp5d/Atp5j/Ndufa7/Park7/Uqcrb/Cox7c/Cox7a2/Atp5c1/Atp5e/Ndufv3/Uqcr10/Atp5h/Chchd2/Atp5b/Atp5o/Ndufa3/Cox5a/Cox4i1/Ndufb7/Ndufb4/Atp5k/Ndufa1/Ndufa12/Ndufb8/Ndufa2/Ndufa11/Ndufb11/Ndufb9/Ndufa5/Sdhb/Ndufs4/Ndufa8/Cox7a2l/Ndufs5/Ndufv2/Ndufb5/Uqcrq/Ndufc2/Rhoa/Uqcr11/Ndufs7/Ndufb2/Ndufb10/Dnajc15/Ndufb6/Ndufs3/Ndufs8/Uqcc2/Cycs/Ndufc1/Ndufs6/Uqcrc2/Uqcrc1/Ndufab1/Ndufb3/Uqcrf…	GO Biological Process
CD4+ memory T	GO:0006754	ATP biosynthetic process	65	0.781902	2.07811	1e-10	3.17722e-08	2.95848e-08	689	tags=65%, list=11%, signal=58%	Aldoa/Atp5g1/Eno1/Ndufa13/Atp5j2/Atp5d/Atp5g2/Atp5j/Ndufa7/Pkm/Atp5c1/Atp5e/Ndufv3/Atp5h/Atp5l/Atp5b/Atp5o/Ndufa3/Ndufb7/Ndufb4/Atp5k/Ndufa1/Ndufa12/Ndufb8/Ndufa2/Ndufa11/Ndufb11/Ndufb9/Ndufa5/Sdhb/Ndufs4/Ndufa8/Ndufs5/Ndufv2/Ndufb5/Ndufc2/Ndufs7/Ndufb2/Ndufb10/Ndufb6/Ndufs3/Ndufs8	GO Biological Process
CD4+ memory T	GO:0009206	purine ribonucleoside triphosphate biosynthetic process	69	0.781942	2.07562	1e-10	3.17722e-08	2.95848e-08	689	tags=64%, list=11%, signal=57%	Nme2/Aldoa/Atp5g1/Eno1/Ndufa13/Atp5j2/Atp5d/Atp5g2/Atp5j/Ndufa7/Pkm/Atp5c1/Atp5e/Ndufv3/Atp5h/Atp5l/Atp5b/Atp5o/Ndufa3/Ndufb7/Ndufb4/Atp5k/Ndufa1/Ndufa12/Ndufb8/Ndufa2/Ndufa11/Ndufb11/Ndufb9/Ndufa5/Sdhb/Ndufs4/Ndufa8/Ndufs5/Ndufv2/Ndufb5/Ndufc2/Nme1/Ndufs7/Ndufb2/Ndufb10/Ndufb6/Ndufs3/Ndufs8	GO Biological Process
CD4+ memory T	GO:0009201	ribonucleoside triphosphate biosynthetic process	70	0.779022	2.07334	1e-10	3.17722e-08	2.95848e-08	689	tags=63%, list=11%, signal=56%	Nme2/Aldoa/Atp5g1/Eno1/Ndufa13/Atp5j2/Atp5d/Atp5g2/Atp5j/Ndufa7/Pkm/Atp5c1/Atp5e/Ndufv3/Atp5h/Atp5l/Atp5b/Atp5o/Ndufa3/Ndufb7/Ndufb4/Atp5k/Ndufa1/Ndufa12/Ndufb8/Ndufa2/Ndufa11/Ndufb11/Ndufb9/Ndufa5/Sdhb/Ndufs4/Ndufa8/Ndufs5/Ndufv2/Ndufb5/Ndufc2/Nme1/Ndufs7/Ndufb2/Ndufb10/Ndufb6/Ndufs3/Ndufs8	GO Biological Process
CD4+ memory T	GO:0009145	purine nucleoside triphosphate biosynthetic process	70	0.775344	2.06355	1e-10	3.17722e-08	2.95848e-08	894	tags=69%, list=15%, signal=59%	Nme2/Aldoa/Atp5g1/Eno1/Ndufa13/Atp5j2/Atp5d/Atp5g2/Atp5j/Ndufa7/Pkm/Atp5c1/Atp5e/Ndufv3/Atp5h/Atp5l/Atp5b/Atp5o/Ndufa3/Ndufb7/Ndufb4/Atp5k/Ndufa1/Ndufa12/Ndufb8/Ndufa2/Ndufa11/Ndufb11/Ndufb9/Ndufa5/Sdhb/Ndufs4/Ndufa8/Ndufs5/Ndufv2/Ndufb5/Ndufc2/Nme1/Ndufs7/Ndufb2/Ndufb10/Ndufb6/Ndufs3/Ndufs8/Ndufc1/Ndufs6/Adk/Ndufab1	GO Biological Process
CD4+ memory T	GO:0009142	nucleoside triphosphate biosynthetic process	74	0.763922	2.05035	1e-10	3.17722e-08	2.95848e-08	894	tags=65%, list=15%, signal=56%	Nme2/Aldoa/Atp5g1/Eno1/Ndufa13/Atp5j2/Atp5d/Atp5g2/Atp5j/Ndufa7/Pkm/Atp5c1/Atp5e/Ndufv3/Atp5h/Atp5l/Atp5b/Atp5o/Ndufa3/Ndufb7/Ndufb4/Atp5k/Ndufa1/Ndufa12/Ndufb8/Ndufa2/Ndufa11/Ndufb11/Ndufb9/Ndufa5/Sdhb/Ndufs4/Ndufa8/Ndufs5/Ndufv2/Ndufb5/Ndufc2/Nme1/Ndufs7/Ndufb2/Ndufb10/Ndufb6/Ndufs3/Ndufs8/Ndufc1/Ndufs6/Adk/Ndufab1	GO Biological Process
CD4+ memory T	GO:0009060	aerobic respiration	115	0.725426	2.00984	1e-10	3.17722e-08	2.95848e-08	1267	tags=66%, list=21%, signal=53%	Ndufa13/Cox5b/Atp5j2/Atp5d/Atp5j/Ndufa7/Park7/Uqcrb/Cox7c/Cox7a2/Atp5c1/Atp5e/Ndufv3/Uqcr10/Atp5h/Chchd2/Atp5b/Atp5o/Ndufa3/Cox5a/Cox4i1/Ndufb7/Ndufb4/Atp5k/Ndufa1/Ndufa12/Ndufb8/Ndufa2/Ndufa11/Ndufb11/Ndufb9/Ndufa5/Sdhb/Ndufs4/Ndufa8/Cox7a2l/Ndufs5/Ndufv2/Ndufb5/Uqcrq/Bloc1s1/Ndufc2/Rhoa/Uqcr11/Ndufs7/Mdh2/Ndufb2/Ndufb10/Dnajc15/Ndufb6/Ndufs3/Ndufs8/Nop53/Uqcc2/Cycs/Ndufc1/Ndufs6/Uqcrc2/Uqcrc1/N…	GO Biological Process
CD4+ memory T	GO:0009152	purine ribonucleotide biosynthetic process	99	0.729727	2.00228	1e-10	3.17722e-08	2.95848e-08	689	tags=47%, list=11%, signal=43%	Nme2/Aldoa/Atp5g1/Eno1/Ndufa13/Atp5j2/Atp5d/Atp5g2/Atp5j/Ndufa7/Pkm/Atp5c1/Atp5e/Ndufv3/Atp5h/Atp5l/Atp5b/Atp5o/Ndufa3/Ndufb7/Ndufb4/Atp5k/Ndufa1/Ndufa12/Ndufb8/Ndufa2/Ndufa11/Ndufb11/Ndufb9/Ndufa5/Sdhb/Ndufs4/Ndufa8/Ndufs5/Ndufv2/Ndufb5/Aprt/Ndufc2/Nme1/Mpc2/Ndufs7/Ndufb2/Hprt/Ndufb10/Ndufb6/Ndufs3/Ndufs8	GO Biological Process
CD4+ memory T	GO:0006164	purine nucleotide biosynthetic process	103	0.721719	1.98461	1e-10	3.17722e-08	2.95848e-08	689	tags=46%, list=11%, signal=41%	Nme2/Aldoa/Atp5g1/Eno1/Ndufa13/Atp5j2/Atp5d/Atp5g2/Atp5j/Ndufa7/Pkm/Atp5c1/Atp5e/Ndufv3/Atp5h/Atp5l/Atp5b/Atp5o/Ndufa3/Ndufb7/Ndufb4/Atp5k/Ndufa1/Ndufa12/Ndufb8/Ndufa2/Ndufa11/Ndufb11/Ndufb9/Ndufa5/Sdhb/Ndufs4/Ndufa8/Ndufs5/Ndufv2/Ndufb5/Aprt/Ndufc2/Nme1/Mpc2/Ndufs7/Ndufb2/Hprt/Ndufb10/Ndufb6/Ndufs3/Ndufs8	GO Biological Process
CD4+ memory T	GO:0009260	ribonucleotide biosynthetic process	102	0.720206	1.98118	1e-10	3.17722e-08	2.95848e-08	689	tags=46%, list=11%, signal=42%	Nme2/Aldoa/Atp5g1/Eno1/Ndufa13/Atp5j2/Atp5d/Atp5g2/Atp5j/Ndufa7/Pkm/Atp5c1/Atp5e/Ndufv3/Atp5h/Atp5l/Atp5b/Atp5o/Ndufa3/Ndufb7/Ndufb4/Atp5k/Ndufa1/Ndufa12/Ndufb8/Ndufa2/Ndufa11/Ndufb11/Ndufb9/Ndufa5/Sdhb/Ndufs4/Ndufa8/Ndufs5/Ndufv2/Ndufb5/Aprt/Ndufc2/Nme1/Mpc2/Ndufs7/Ndufb2/Hprt/Ndufb10/Ndufb6/Ndufs3/Ndufs8	GO Biological Process
CD4+ memory T	GO:0046390	ribose phosphate biosynthetic process	106	0.71497	1.97422	1e-10	3.17722e-08	2.95848e-08	689	tags=44%, list=11%, signal=40%	Nme2/Aldoa/Atp5g1/Eno1/Ndufa13/Atp5j2/Atp5d/Atp5g2/Atp5j/Ndufa7/Pkm/Atp5c1/Atp5e/Ndufv3/Atp5h/Atp5l/Atp5b/Atp5o/Ndufa3/Ndufb7/Ndufb4/Atp5k/Ndufa1/Ndufa12/Ndufb8/Ndufa2/Ndufa11/Ndufb11/Ndufb9/Ndufa5/Sdhb/Ndufs4/Ndufa8/Ndufs5/Ndufv2/Ndufb5/Aprt/Ndufc2/Nme1/Mpc2/Ndufs7/Ndufb2/Hprt/Ndufb10/Ndufb6/Ndufs3/Ndufs8	GO Biological Process
CD4+ memory T	GO:0045333	cellular respiration	134	0.700383	1.95799	1e-10	3.17722e-08	2.95848e-08	1290	tags=62%, list=21%, signal=50%	Ndufa13/Cox5b/Atp5j2/Atp5d/Atp5j/Ndufa7/Park7/Uqcrb/Prelid1/Cox7c/Cox7a2/Atp5c1/Atp5e/Ndufv3/Uqcr10/Atp5h/Chchd2/Atp5b/Atp5o/Ndufa3/Cox5a/Cox4i1/Ndufb7/Ndufb4/Bax/Atp5k/Ndufa1/Ndufa12/Ndufb8/Ndufa2/Ndufa11/Ndufb11/Ndufb9/Ndufa5/Sdhb/Ndufs4/Etfb/Ndufa8/Cox7a2l/Ndufs5/Ndufv2/Ndufb5/Uqcrq/Bloc1s1/Ndufc2/Rhoa/Uqcr11/Ndufs7/Mdh2/Ndufb2/Ndufb10/Dnajc15/Ndufb6/Ndufs3/Ndufs8/Nop53/Uqcc2/Sod2/Cycs/Ndufc1/…	GO Biological Process
CD4+ memory T	GO:0015980	energy derivation by oxidation of organic compounds	159	0.675731	1.90557	1e-10	3.17722e-08	2.95848e-08	1290	tags=55%, list=21%, signal=45%	Ndufa13/Cox5b/Hmgb1/Atp5j2/Atp5d/Ldha/Atp5j/Ndufa7/Park7/Uqcrb/Prelid1/Cox7c/Cox7a2/Atp5c1/Atp5e/Ndufv3/Uqcr10/Atp5h/Chchd2/Atp5b/Atp5o/Ndufa3/Cox5a/Cox4i1/Ndufb7/Ndufb4/Bax/Atp5k/Ndufa1/Ndufa12/Ndufb8/Ndufa2/Ndufa11/Ndufb11/Ndufb9/Ndufa5/Sdhb/Ndufs4/Etfb/Ndufa8/Cox7a2l/Ndufs5/Ndufv2/Ndufb5/Uqcrq/Bloc1s1/Ndufc2/Rhoa/Uqcr11/Ppp1ca/Ndufs7/Mdh2/Ndufb2/Ndufb10/Dnajc15/Ndufb6/Ndufs3/Ndufs8/Nop53/Uqcc2…	GO Biological Process
CD4+ memory T	GO:0006412	translation	436	0.634861	1.82722	1e-10	3.17722e-08	2.95848e-08	673	tags=30%, list=11%, signal=29%	Uba52/Rpl10/Rps15a/Rpl15/Rbm3/Rps18/Rps11/Rplp0/Rpl32/Rpl11/Rpl34/Rps7/Rps3/Gapdh/Rpl21/Rps2/Rpl24/Rpl9/Rpl36/Rpl28/Rpl35/Rpl14/Rpl26/Fau/Rps5/Rpl8/Rps4x/Rpl39/Rpl13/Rpl3/Rpl19/Rpl10a/Rpl6/Rps10/Rpl17/Rps27a/Rpl12/Rpl18a/Rps13/Rpl22l1/Rpl18/Rpl27a/Rpl29/Rpl37/Eif3h/Rps16/Rps23/Rpsa/Eif1/Vim/Rpl30/Rps24/Cirbp/Rps29/Rps21/Ndufa7/Rpl7/Rpl23/Eef1a1/Eif5a/Rpl7a/Rpl38/Rpl27/Pkm/Eef1b2/Rps20/Rpl13a/Rps3…	GO Biological Process
CD4+ memory T	GO:0006091	generation of precursor metabolites and energy	208	0.639256	1.81682	1e-10	3.17722e-08	2.95848e-08	1267	tags=50%, list=21%, signal=40%	Gapdh/Aldoa/Eno1/Ndufa13/Cox5b/Hmgb1/Atp5j2/Atp5d/Ldha/Atp5j/Ndufa7/Park7/Uqcrb/Prelid1/Pkm/Cox7c/Cox7a2/Atp5c1/Atp5e/Ndufv3/Uqcr10/Atp5h/Chchd2/Atp5b/Atp5o/Ndufa4/Ndufa3/Cox5a/Cox4i1/Ndufb7/Ndufb4/Bax/Atp5k/Ndufa1/Ndufa12/Ndufb8/Ndufa2/Ndufa11/Ndufb11/Tpi1/Ndufb9/Ndufa5/Sdhb/Ndufs4/Etfb/Ndufa8/Cox7a2l/Ndufs5/Ndufv2/Pgls/Ndufb5/Uqcrq/Eif6/Bloc1s1/Ndufc2/Rhoa/Uqcr11/Pgk1/Ppp1ca/Ndufs7/Mdh2/Ndufb2/…	GO Biological Process
CD4+ memory T	GO:0043043	peptide biosynthetic process	441	0.631321	1.8164	1e-10	3.17722e-08	2.95848e-08	673	tags=29%, list=11%, signal=28%	Uba52/Rpl10/Rps15a/Rpl15/Rbm3/Rps18/Rps11/Rplp0/Rpl32/Rpl11/Rpl34/Rps7/Rps3/Gapdh/Rpl21/Rps2/Rpl24/Rpl9/Rpl36/Rpl28/Rpl35/Rpl14/Rpl26/Fau/Rps5/Rpl8/Rps4x/Rpl39/Rpl13/Rpl3/Rpl19/Rpl10a/Rpl6/Rps10/Rpl17/Rps27a/Rpl12/Rpl18a/Rps13/Rpl22l1/Rpl18/Rpl27a/Rpl29/Rpl37/Eif3h/Rps16/Rps23/Rpsa/Eif1/Vim/Rpl30/Rps24/Cirbp/Rps29/Rps21/Ndufa7/Rpl7/Rpl23/Eef1a1/Eif5a/Rpl7a/Rpl38/Rpl27/Pkm/Eef1b2/Rps20/Rpl13a/Rps3…	GO Biological Process
CD4+ memory T	GO:0043604	amide biosynthetic process	481	0.618817	1.77959	1e-10	3.17722e-08	2.95848e-08	713	tags=28%, list=12%, signal=27%	Uba52/Rpl10/Rps15a/Rpl15/Rbm3/Rps18/Rps11/Rplp0/Rpl32/Rpl11/Rpl34/Rps7/Rps3/Gapdh/Rpl21/Rps2/Rpl24/Rpl9/Rpl36/Rpl28/Rpl35/Rpl14/Rpl26/Fau/Rps5/Rpl8/Rps4x/Rpl39/Rpl13/Rpl3/Rpl19/Rpl10a/Rpl6/Rps10/Rpl17/Rps27a/Rpl12/Rpl18a/Rps13/Rpl22l1/Rpl18/Rpl27a/Rpl29/Rpl37/Eif3h/Rps16/Rps23/Rpsa/Eif1/Vim/Rpl30/Rps24/Cirbp/Rps29/Rps21/Ndufa7/Rpl7/Rpl23/Eef1a1/Eif5a/Rpl7a/Rpl38/Rpl27/Pkm/Eef1b2/Rps20/Rpl13a/Rps3…	GO Biological Process
CD4+ memory T	GO:0003735	structural constituent of ribosome	145	0.81877	2.29062	1e-10	4.825e-08	4.32105e-08	425	tags=55%, list=7%, signal=53%	Uba52/Rpl10/Rps15a/Rpl15/Rps18/Rps11/Rplp0/Rpl32/Rpl11/Rpl34/Rps7/Rps3/Rpl21/Rps2/Rpl24/Rpl9/Rpl36/Rpl28/Rpl35/Rpl14/Rpl26/Fau/Rps5/Rpl8/Rps4x/Rpl39/Rpl13/Rpl3/Rpl19/Rpl10a/Rpl6/Rps10/Rpl17/Rps27a/Rpl12/Rpl18a/Rps13/Rpl22l1/Rpl18/Rpl27a/Rpl29/Rpl37/Rps16/Rps27/Rps23/Rpsa/Rpl30/Rps24/Rps29/Rps21/Ndufa7/Rpl7/Rpl23/Rpl36al/Rpl7a/Rpl38/Rpl27/Rps20/Rpl13a/Rps3a1/Rps14/Rps25/Mrpl52/Rps19/Rpl36a/Rps6/Rp…	GO Molecular Function
CD4+ memory T	GO:0005198	structural molecule activity	215	0.785715	2.24128	1e-10	4.825e-08	4.32105e-08	515	tags=44%, list=9%, signal=42%	Uba52/Rpl10/Rps15a/Rpl15/Rps18/Rps11/Rplp0/Rpl32/Rpl11/Rpl34/Rps7/Rps3/Rpl21/Rps2/Rpl24/Rpl9/Rpl36/Rpl28/Rpl35/Rpl14/Rpl26/Fau/Rps5/Rpl8/Rps4x/Rpl39/Rpl13/Rpl3/Rpl19/Rpl10a/Rpl6/Rps10/Rpl17/Rps27a/Rpl12/Rpl18a/Rps13/Rpl22l1/Rpl18/Rpl27a/Rpl29/Rpl37/Rps16/Rps27/Rps23/Rpsa/Vim/Arpc3/Rpl30/Rps24/Rps29/Rps21/Ndufa7/Rpl7/Rpl23/Rpl36al/Rpl7a/Rpl38/Rpl27/Rps20/Rpl13a/Rps3a1/Rps14/Rps25/Mrpl52/Actb/Rps19…	GO Molecular Function
CD4+ memory T	GO:0030183	B cell differentiation	95	-0.574787	-2.32253	3.12805e-10	7.77797e-08	7.24247e-08	544	tags=36%, list=9%, signal=33%	Il21/Clcf1/Malt1/Ikzf3/Irf2bp2/Pik3r1/Xbp1/Tcirg1/Dock11/Syvn1/Cd24a/Dock10/Laptm5/Pou2af1/Spib/Ep300/Hdac7/Ptpn6/Ikzf1/Foxp1/Pou2f2/Zfp36l1/Nfatc1/Irf8/Syk/Bcl11a/Cd19/Cr2/Igkc/H2-Ab1/Cd79b/Ms4a1/Ighm/Cd79a	GO Biological Process
CD4+ memory T	mmu04932	Non-alcoholic fatty liver disease - Mus musculus (house mouse)	106	0.685151	1.87031	5.85093e-09	1.38172e-07	1.1844e-07	978	tags=53%, list=17%, signal=45%	Cox8a/Ndufa13/Cox5b/Cox7b/Cox6c/Ndufa7/Uqcrb/Cox7c/Cox7a2/Cox6b1/Ndufv3/Uqcr10/Ndufa4/Ndufa3/Cox5a/Cox4i1/Ndufb7/Ndufb4/Bax/Ndufa1/Ndufa12/Ndufb8/Ndufa2/Ndufa11/Ndufb11/Ndufb9/Ndufa5/Sdhb/Ndufs4/Ndufa8/Cox7a2l/Ndufs5/Ndufv2/Ndufb5/Uqcrq/Ndufc2/Uqcr11/Ndufs7/Jun/Ndufb2/Ndufb10/Ndufb6/Fos/Ndufs3/Ndufs8/Rac1/Cdc42/Cycs/Ndufc1/Ndufs6/Uqcrc2/Uqcrc1/Ndufab1/Ndufb3/Socs3/Uqcrfs1	Kegg Pathway
CD4+ memory T	GO:0019843	rRNA binding	57	0.792068	2.08187	7.85431e-10	2.52647e-07	2.26259e-07	694	tags=53%, list=12%, signal=47%	Rps18/Rps11/Rplp0/Rpl11/Rps3/Rpl9/Rps5/Rpl8/Rps4x/Rpl3/Rpl19/Rpl6/Rpl17/Rpl12/Rps13/Rpl37/Cirbp/Rpl7/Rpl23/Rps14/Rpl5/Mrps18c/Rpl4/Npm1/Imp3/Eef2/Ncl/Mrpl18/Mrpl20/Nop53	GO Molecular Function
CD4+ memory T	GO:0015078	proton transmembrane transporter activity	52	0.781459	2.03349	5.27906e-09	1.27357e-06	1.14056e-06	564	tags=54%, list=9%, signal=49%	Cox8a/Atp5g1/Cox7b/Cox6c/Atp5j2/Atp5d/Atp5g2/Atp5j/Cox7c/Cox7a2/Atp5c1/Atp5e/Atp5h/Atp5l/Atp6v0e/Atp5b/Slc25a4/Atp5o/Cox5a/Atp6v1f/Cox4i1/Atp5k/Cox7a2l/Atp6v0c/Uqcrq/Uqcr11/Atp6v1g1/Slc25a5	GO Molecular Function
CD4+ memory T	GO:0016064	immunoglobulin mediated immune response	75	-0.587464	-2.36269	6.4663e-09	1.31706e-06	1.22638e-06	370	tags=36%, list=6%, signal=34%	Tcirg1/Cd28/H2-Oa/Prkcd/Slc15a4/Igha/H2-DMb1/Cd55/Ighg2b/Ptpn6/Swap70/H2-DMb2/Pou2f2/Fcer2a/Hspd1/H2-Ob/H2-Eb1/Iglc3/Cd19/Iglc2/Ighd/Cr2/Igkc/H2-Ab1/H2-Aa/Ighm/Cd74	GO Biological Process
CD4+ memory T	GO:0046034	ATP metabolic process	106	0.682023	1.88324	1.20876e-08	2.0332e-06	1.89322e-06	689	tags=47%, list=11%, signal=43%	Gapdh/Tspo/Aldoa/Atp5g1/Eno1/Ndufa13/Atp5j2/Atp5d/Atp5g2/Atp5j/Ndufa7/Pkm/Atp5c1/Atp5e/Ndufv3/Atp5h/Atp5l/Atp5b/Atp5o/Ndufa3/Ndufb7/Ndufb4/Atp5k/Ndufa1/Ndufa12/Ndufb8/Ndufa2/Ndufa11/Ndufb11/Tpi1/Ndufb9/Ndufa5/Sdhb/Ndufs4/Ndufa8/Ndufs5/Ndufv2/Ndufb5/Atpif1/Fis1/Eif6/Ndufc2/Pgk1/Ndufs7/Ndufb2/Ndufb10/Ndufb6/Pgam1/Ndufs3/Ndufs8	GO Biological Process
CD4+ memory T	GO:0050853	B cell receptor signaling pathway	43	-0.697696	-2.46919	2.00791e-08	3.18979e-06	2.97019e-06	197	tags=51%, list=3%, signal=50%	Lat2/Lyn/Igha/Cd38/Prkcb/Ighg2b/Ptpn6/Blnk/Blk/Foxp1/Cd22/Syk/Iglc3/Mef2c/Cd19/Iglc2/Ighd/Igkc/Cd79b/Ms4a1/Ighm/Cd79a	GO Biological Process
CD4+ memory T	mmu05150	Staphylococcus aureus infection - Mus musculus (house mouse)	13	-0.895915	-2.36883	2.56752e-07	5.63021e-06	4.82617e-06	318	tags=69%, list=5%, signal=66%	H2-Oa/H2-DMb1/Itgal/H2-DMb2/H2-Ob/H2-Eb1/H2-Ab1/Camp/H2-Aa	Kegg Pathway
CD4+ memory T	mmu04662	B cell receptor signaling pathway - Mus musculus (house mouse)	56	-0.601207	-2.28512	1.12846e-06	2.30957e-05	1.97975e-05	463	tags=39%, list=8%, signal=37%	Malt1/Nfatc3/Pik3r1/Ppp3r1/Ppp3cb/Lyn/Ikbkb/Prkcb/Ptpn6/Nfkb1/Ppp3ca/Blnk/Blk/Cd72/Nfatc1/Cd22/Syk/Bank1/Cd19/Cr2/Cd79b/Cd79a	Kegg Pathway
CD4+ memory T	GO:0050864	regulation of B cell activation	94	-0.509098	-2.07441	4.13961e-07	5.14661e-05	4.79228e-05	378	tags=32%, list=6%, signal=30%	Xbp1/Rc3h1/Pten/Cd28/Btla/Cd24a/Slc15a4/Laptm5/Lyn/Igha/Cd38/Peli1/Ighg2b/Mzb1/Ptpn6/Blk/Zfp36l1/Siglecg/Tnfrsf13c/Cd22/Syk/Iglc3/Bank1/Mef2c/Cd19/Iglc2/Ighd/Igkc/Ighm/Cd74	GO Biological Process
CD4+ memory T	GO:0042254	ribosome biogenesis	197	0.583454	1.65559	4.48798e-07	5.46101e-05	5.08503e-05	1022	tags=29%, list=17%, signal=25%	Rpl10/Rplp0/Rpl11/Rps7/Rps2/Rpl24/Rpl35/Rpl14/Rpl26/Rps5/Rpl10a/Rpl6/Rps16/Rps27/Rpsa/Rps24/Rps21/Rpl7/Rpl7a/Rpl38/Rpl27/Rps14/Rps25/Rps19/Rps6/Rpl5/Rps8/Rps28/Rpl35a/Npm1/Trmt112/Nop10/Rbis/Eif6/Exosc8/Imp3/Nsa2/Snu13/Ncl/Mrpl20/Isg20/Nop53/Ran/Rps27l/Fbl/Frg1/Gtf2h5/Pak1ip1/Exosc7/Rps27rt/Wdr43/Rrp1/Rps17/Nhp2/C1d/Utp3/Pop5	GO Biological Process
CD4+ memory T	mmu04723	Retrograde endocannabinoid signaling - Mus musculus (house mouse)	64	0.699455	1.82998	4.3158e-06	8.28094e-05	7.09836e-05	955	tags=56%, list=16%, signal=48%	Ndufa13/Gng5/Ndufa7/Ndufv3/Ndufa4/Ndufa3/Ndufb7/Ndufb4/Gnai2/Ndufa1/Ndufa12/Ndufb8/Ndufa2/Ndufa11/Ndufb11/Ndufb9/Ndufa5/Ndufs4/Ndufa8/Ndufs5/Ndufv2/Ndufb5/Prkca/Ndufc2/Ndufs7/Ndufb2/Ndufb10/Ndufb6/Ndufs3/Ndufs8/Ndufc1/Gng10/Ndufs6/Ndufab1/Plcb4/Ndufb3	Kegg Pathway
CD4+ memory T	mmu05152	Tuberculosis - Mus musculus (house mouse)	92	-0.451318	-1.89387	6.49425e-06	0.000117279	0.00010053	463	tags=23%, list=8%, signal=21%	Malt1/Crebbp/Ppp3r1/Tcirg1/Ppp3cb/Irak1/H2-Oa/H2-DMb1/Ep300/Ciita/Nfkb1/Ppp3ca/H2-DMb2/Hspd1/Syk/H2-Ob/H2-Eb1/H2-Ab1/Camp/H2-Aa/Cd74	Kegg Pathway
CD4+ memory T	mmu03050	Proteasome - Mus musculus (house mouse)	44	0.727233	1.84422	7.63374e-06	0.000130198	0.000111604	903	tags=64%, list=15%, signal=54%	Psmb8/Psme1/Psma2/Psme2/Psmb1/Psmb10/Psmb3/Psmb2/Psmb6/Psma3/Psmb5/Psma7/Psma4/Psmd4/Pomp/Psmd8/Psmb9/Psmd12/Psma5/Psma1/Sem1/Psmc5/Psmc2/Psmb7/Psmc4/Psma6/Psmd7/Psmc3	Kegg Pathway
CD4+ memory T	GO:0042255	ribosome assembly	43	0.766122	1.94924	1.44341e-06	0.000155753	0.00014503	729	tags=44%, list=12%, signal=39%	Rpl10/Rplp0/Rpl11/Rps2/Rpl24/Rps5/Rpl6/Rps27/Rpsa/Rpl38/Rps14/Rps25/Rps19/Rpl5/Rps28/Eif6/Mrpl20/Nop53/Rps27l	GO Biological Process
CD4+ memory T	mmu05144	Malaria - Mus musculus (house mouse)	14	0.885204	1.87928	1.52647e-05	0.000234313	0.000200851	18	tags=29%, list=0%, signal=29%	Hbb-bs/Hba-a2/Hba-a1/Hbb-bt	Kegg Pathway
CD4+ memory T	mmu01100	Metabolic pathways - Mus musculus (house mouse)	493	0.484052	1.3719	1.46608e-05	0.000234313	0.000200851	1299	tags=31%, list=22%, signal=26%	Gapdh/Nme2/Cox8a/Mif/Aldoa/Atp5g1/Eno1/Ndufa13/Cox5b/Cox7b/Cox6c/Dad1/Gpx4/Atp5j2/Atp5d/Atp5g2/Ldha/Atp5j/Ndufa7/Uqcrb/Pkm/Cox7c/Cox7a2/Atp5c1/Cox6b1/Atp5e/Ndufv3/Uqcr10/Atp5h/Atp5l/Atp6v0e/Atp5b/Atp5o/Ndufa4/Ndufa3/Cox5a/Atp6v1f/Cox4i1/Nt5c/Ndufb7/Ndufb4/Plaat3/Atp5k/Ndufa1/Gstp3/Ndufa12/Ndufb8/Gstp1/Esd/Ndufa2/Ndufa11/Ndufb11/Tpi1/Ndufb9/Ndufa5/Sdhb/Ndufs4/Ndufa8/Cox7a2l/Ndufs5/Ndufv2/Pgls/Atp6…	Kegg Pathway
CD4+ memory T	GO:0042100	B cell proliferation	53	-0.583371	-2.09724	2.26927e-06	0.000240333	0.000223786	377	tags=40%, list=6%, signal=37%	Rc3h1/Pten/Btla/Cd24a/Prkcd/Lyn/Cd38/Peli1/Mzb1/Blk/Siglecg/Tnfrsf13c/Cd22/Hspd1/Mef2c/Cd19/Ighd/Cr2/Ighm/Cd79a/Cd74	GO Biological Process
CD4+ memory T	mmu05143	African trypanosomiasis - Mus musculus (house mouse)	14	0.884095	1.87693	1.79427e-05	0.000262305	0.000224846	18	tags=29%, list=0%, signal=29%	Hbb-bs/Hba-a2/Hba-a1/Hbb-bt	Kegg Pathway
CD4+ memory T	GO:0002377	immunoglobulin production	82	-0.484364	-1.97313	4.68054e-06	0.000469614	0.000437282	378	tags=24%, list=6%, signal=23%	Xbp1/Tcirg1/Cd28/H2-Oa/Slc15a4/H2-DMb1/Mzb1/Swap70/Foxp1/H2-DMb2/Pou2f2/Siglecg/Cd22/Hspd1/H2-Ob/H2-Eb1/Ighd/H2-Ab1/H2-Aa/Ighm	GO Biological Process
CD4+ memory T	GO:0035821	modulation of process of another organism	8	-0.927559	-2.18992	4.78537e-06	0.000471854	0.000439368	59	tags=62%, list=1%, signal=62%	Fcer2a/Syk/Ltf/Camp/S100a9	GO Biological Process
CD4+ memory T	GO:1901137	carbohydrate derivative biosynthetic process	241	0.542029	1.5473	6.9613e-06	0.000674774	0.000628318	990	tags=29%, list=16%, signal=26%	Nme2/Itm2b/Aldoa/Atp5g1/Eno1/Ndufa13/Dad1/Atp5j2/Atp5d/Ost4/Atp5g2/Atp5j/Ndufa7/Pkm/Krtcap2/Atp5c1/Atp5e/Ndufv3/Atp5h/Atp5l/Atp5b/Atp5o/Tmem258/Ndufa3/Ndufb7/Ndufb4/Atp5k/Ndufa1/Ndufa12/Ccnd3/Ndufb8/Ndufa2/Ndufa11/Ndufb11/Tpi1/Ndufb9/Ndufa5/Sdhb/Ndufs4/Ndufa8/Ndufs5/Ndufv2/Ramp1/Ndufb5/Tmem59/Dpm1/Dpm3/Aprt/Ndufc2/Nme1/Mpc2/Ndufs7/Ndufb2/Hprt/Akr1a1/Ndufb10/Ostc/Ndufb6/Ndufs3/Ndufs8/Dut/Ndufc1/Bc…	GO Biological Process
CD4+ memory T	GO:0007005	mitochondrion organization	271	0.53009	1.51348	7.16261e-06	0.000682716	0.000635713	1342	tags=39%, list=22%, signal=32%	Tspo/Pycard/Atp5d/Park7/Prelid1/Cox7a2/Sdhaf1/Micos13/Chchd2/Gabarapl2/Slc25a4/Ndufa3/Ndufb7/Map1lc3b/Ndufb4/Tomm7/Bax/Ndufa1/Ndufa12/Ndufb8/Gabarap/Ndufa2/Ndufa11/Gimap5/Ndufb11/Ndufb9/Ndufa5/Ndufs4/Ndufa8/Cox7a2l/Ndufs5/Cdc37/Ndufb5/Atpif1/Fis1/Casp1/Hsd17b10/Fundc2/Ndufc2/Timm13/Timm23/Bcap31/Grpel1/Coa3/Ssbp1/Cox20/Slc25a5/Tomm22/Ndufs7/Jun/Ndufb2/Gimap3/Ndufb10/Timm17b/Dnajc15/Ndufb6/Tomm20/…	GO Biological Process
CD4+ memory T	GO:0010257	NADH dehydrogenase complex assembly	40	0.759882	1.90324	7.60541e-06	0.000690402	0.00064287	1047	tags=72%, list=17%, signal=60%	Ndufa3/Ndufb7/Ndufb4/Ndufa1/Ndufa12/Ndufb8/Ndufa2/Ndufa11/Ndufb11/Ndufb9/Ndufa5/Ndufs4/Ndufa8/Ndufs5/Ndufb5/Ndufc2/Ndufs7/Ndufb2/Ndufb10/Ndufb6/Ndufs3/Tmem126a/Ndufs8/Ndufc1/Ndufs6/Ndufab1/Ndufaf8/Ndufb3/Ndufa6	GO Biological Process
CD4+ memory T	GO:0032981	mitochondrial respiratory chain complex I assembly	40	0.759882	1.90324	7.60541e-06	0.000690402	0.00064287	1047	tags=72%, list=17%, signal=60%	Ndufa3/Ndufb7/Ndufb4/Ndufa1/Ndufa12/Ndufb8/Ndufa2/Ndufa11/Ndufb11/Ndufb9/Ndufa5/Ndufs4/Ndufa8/Ndufs5/Ndufb5/Ndufc2/Ndufs7/Ndufb2/Ndufb10/Ndufb6/Ndufs3/Tmem126a/Ndufs8/Ndufc1/Ndufs6/Ndufab1/Ndufaf8/Ndufb3/Ndufa6	GO Biological Process
CD4+ memory T	GO:0009055	electron transfer activity	42	0.74767	1.89714	5.33767e-06	0.000858475	0.000768811	698	tags=57%, list=12%, signal=51%	Cyba/Cox8a/Cox7b/Cox6c/Ndufa7/Cox7c/Cox7a2/Cox5a/Cox4i1/Ndufb7/Ndufb8/Ndufa2/Sdhb/Ndufs4/Etfb/Cox7a2l/Ndufv2/Uqcrq/Ndufc2/Uqcr11/Ndufs7/Ndufs3/Ndufs8/Glrx	GO Molecular Function
CD4+ memory T	GO:0000028	ribosomal small subunit assembly	16	0.861496	1.87312	1.02134e-05	0.000898619	0.000836751	343	tags=56%, list=6%, signal=53%	Rps2/Rps5/Rps27/Rpsa/Rpl38/Rps14/Rps25/Rps19/Rps28	GO Biological Process
CD4+ memory T	GO:0001227	DNA-binding transcription repressor activity, RNA polymerase II-specific	98	-0.44717	-1.82908	9.68429e-06	0.00107173	0.00095979	698	tags=27%, list=12%, signal=24%	Bcl6/Zfp180/Atf7/Zfp148/Tcf7/Zbtb7a/Trps1/Zeb2/Zfp217/Nfatc3/Purb/Zbtb18/Zbtb4/Etv3/Mxd4/Gata3/Zkscan3/Bach2/Satb1/Nfkb1/Ikzf1/Foxp1/Zbtb20/Nfatc1/Irf8/Bcl11a	GO Molecular Function
CD4+ memory T	GO:0001217	DNA-binding transcription repressor activity	99	-0.442243	-1.81983	9.99537e-06	0.00107173	0.00095979	698	tags=26%, list=12%, signal=24%	Bcl6/Zfp180/Atf7/Zfp148/Tcf7/Zbtb7a/Trps1/Zeb2/Zfp217/Nfatc3/Purb/Zbtb18/Zbtb4/Etv3/Mxd4/Gata3/Zkscan3/Bach2/Satb1/Nfkb1/Ikzf1/Foxp1/Zbtb20/Nfatc1/Irf8/Bcl11a	GO Molecular Function
CD4+ memory T	GO:0015399	primary active transmembrane transporter activity	73	0.664843	1.77909	8.81279e-06	0.00107173	0.00095979	1267	tags=53%, list=21%, signal=43%	Cox8a/Sec61g/Cox7b/Cox6c/Ndufa7/Cox7c/Cox7a2/Atp5e/Atp5l/Atp6v0e/Atp5b/Cox5a/Atp6v1f/Cox4i1/Ndufb7/Ndufb8/Ndufa2/Ndufs4/Cox7a2l/Ndufv2/Atp6v0c/Uqcrq/Ndufc2/Uqcr11/Atp6v1g1/Ndufs7/Tomm20/Ndufs3/Ndufs8/Atp1b3/Anxa5/Uqcrfs1/Tap1/Cyc1/Uqcrh/Atp6v1d/Atp6v1e1/Ndufv1/Cox6a1	GO Molecular Function
CD4+ memory T	GO:0006364	rRNA processing	143	0.591394	1.65872	1.30078e-05	0.001094	0.00101868	1447	tags=43%, list=24%, signal=33%	Rpl11/Rps7/Rpl35/Rpl14/Rpl26/Rpl10a/Rps16/Rps27/Rps24/Rps21/Rpl7/Rpl7a/Rpl27/Rps14/Rps25/Rps19/Rps6/Rpl5/Rps8/Rps28/Rpl35a/Npm1/Trmt112/Nop10/Eif6/Exosc8/Imp3/Nsa2/Snu13/Ncl/Isg20/Nop53/Fbl/Frg1/Gtf2h5/Exosc7/Rps27rt/Wdr43/Rrp1/Rps17/Nhp2/C1d/Utp3/Pop5/Fcf1/Utp11/Mphosph6/Ddx27/Nop14/Ddx18/Lsm6/Ebna1bp2/Wbp11/Exosc4/Mrto4/Pop7/Emg1/Pa2g4/Ddx21/Sbds/Exosc5	GO Biological Process
CD4+ memory T	mmu05310	Asthma - Mus musculus (house mouse)	10	-0.874549	-2.15602	8.02909e-05	0.00112042	0.000960417	318	tags=70%, list=5%, signal=66%	H2-Oa/H2-DMb1/H2-DMb2/H2-Ob/H2-Eb1/H2-Ab1/H2-Aa	Kegg Pathway
CD4+ memory T	GO:0019886	antigen processing and presentation of exogenous peptide antigen via MHC class II	15	-0.82111	-2.24791	1.51518e-05	0.0012379	0.00115268	327	tags=60%, list=5%, signal=57%	H2-Oa/H2-DMb1/H2-DMb2/Unc93b1/H2-Ob/H2-Eb1/H2-Ab1/H2-Aa/Cd74	GO Biological Process
CD4+ memory T	GO:1901798	positive regulation of signal transduction by p53 class mediator	17	0.856151	1.8928	1.86711e-05	0.00150394	0.0014004	188	tags=41%, list=3%, signal=40%	Ubb/Rpl11/Rps7/Rpl26/Rpl37/Rpl23/Rps20	GO Biological Process
CD4+ memory T	GO:0016072	rRNA metabolic process	161	0.569562	1.60646	1.95447e-05	0.00155244	0.00144556	1447	tags=40%, list=24%, signal=31%	Rpl11/Rps7/Rpl35/Rpl14/Rpl26/Rpl10a/Rps16/Rps27/Rps24/Rps21/Rpl7/Rpl7a/Rpl27/Rps14/Rps25/Rps19/Rps6/Rpl5/Rps8/Rps28/Rpl35a/Npm1/Trmt112/Nop10/Eif6/Exosc8/Imp3/Nsa2/Snu13/Ncl/Isg20/Trir/Nop53/Fbl/Frg1/Gtf2h5/Exosc7/Rps27rt/Wdr43/Rrp1/Rps17/Top1/Nhp2/C1d/Utp3/Pop5/Fcf1/Zcchc7/Utp11/Mphosph6/Xrn1/Ddx27/Nop14/Ddx18/Lsm6/Ebna1bp2/Wbp11/Exosc4/Mrto4/Pop7/Emg1/Pa2g4/Ddx21/Sbds/Exosc5	GO Biological Process
CD4+ memory T	GO:0023023	MHC protein complex binding	12	-0.84877	-2.22654	2.99855e-05	0.00222585	0.00199337	327	tags=67%, list=5%, signal=63%	H2-Oa/H2-DMb1/H2-DMb2/H2-Ob/H2-Eb1/H2-Ab1/H2-Aa/Cd74	GO Molecular Function
CD4+ memory T	GO:0055106	ubiquitin-protein transferase regulator activity	15	0.859287	1.85569	4.09442e-05	0.00263407	0.00235896	485	tags=47%, list=8%, signal=43%	Rpl11/Rps7/Rpl37/Rpl23/Rps20/Rpl5/Ube2l3	GO Molecular Function
CD4+ memory T	GO:0002399	MHC class II protein complex assembly	9	-0.885245	-2.18018	3.46451e-05	0.0026775	0.00249316	327	tags=78%, list=5%, signal=74%	H2-Oa/H2-DMb1/H2-DMb2/H2-Ob/H2-Eb1/H2-Ab1/H2-Aa	GO Biological Process
CD4+ memory T	GO:0002503	peptide antigen assembly with MHC class II protein complex	9	-0.885245	-2.18018	3.46451e-05	0.0026775	0.00249316	327	tags=78%, list=5%, signal=74%	H2-Oa/H2-DMb1/H2-DMb2/H2-Ob/H2-Eb1/H2-Ab1/H2-Aa	GO Biological Process
CD4+ memory T	GO:1902255	positive regulation of intrinsic apoptotic signaling pathway by p53 class mediator	5	0.966347	1.69141	3.99024e-05	0.00304269	0.00283321	49	tags=80%, list=1%, signal=79%	Ubb/Rpl11/Rps7/Rpl26	GO Biological Process
CD4+ memory T	mmu04260	Cardiac muscle contraction - Mus musculus (house mouse)	29	0.746757	1.79508	0.000239795	0.00320074	0.00274365	1136	tags=72%, list=19%, signal=59%	Cox8a/Cox5b/Cox7b/Cox6c/Uqcrb/Cox7c/Cox7a2/Cox6b1/Uqcr10/Cox5a/Cox4i1/Cox7a2l/Uqcrq/Uqcr11/Tpm3/Atp1b3/Uqcrc2/Uqcrc1/Uqcrfs1/Cyc1/Uqcrh	Kegg Pathway
CD4+ memory T	GO:0035325	Toll-like receptor binding	5	-0.960649	-1.98506	6.91017e-05	0.00368935	0.00330402	64	tags=60%, list=1%, signal=59%	Unc93b1/Syk/S100a8	GO Molecular Function
CD4+ memory T	GO:0031386	protein tag	11	0.888819	1.80531	9.6724e-05	0.0040582	0.00363434	614	tags=82%, list=10%, signal=74%	Ubb/Uba52/Rps27a/Sumo2/Ubl5/Ubc/Nedd8/Isg15/Sumo1	GO Molecular Function
CD4+ memory T	GO:0061077	chaperone-mediated protein folding	41	-0.571236	-1.99347	7.8155e-05	0.00588116	0.00547626	295	tags=22%, list=5%, signal=21%	Fkbp4/Hspe1/H2-DMb1/H2-DMb2/Chordc1/Dnajb1/Hspa8/Hsph1/Cd74	GO Biological Process
CD4+ memory T	mmu04672	Intestinal immune network for IgA production - Mus musculus (house mouse)	18	-0.726454	-2.09759	0.00050348	0.00609602	0.00522546	325	tags=61%, list=6%, signal=58%	Cd28/H2-Oa/Cxcr4/Icos/H2-DMb1/H2-DMb2/Tnfrsf13c/H2-Ob/H2-Eb1/H2-Ab1/H2-Aa	Kegg Pathway
CD4+ memory T	mmu05145	Toxoplasmosis - Mus musculus (house mouse)	61	-0.464523	-1.76004	0.000516275	0.00609602	0.00522546	337	tags=23%, list=6%, signal=22%	Irak1/H2-Oa/Tab2/H2-DMb1/Ikbkb/Ciita/Xiap/Nfkb1/H2-DMb2/H2-Ob/Hspa8/H2-Eb1/H2-Ab1/H2-Aa	Kegg Pathway
CD4+ memory T	mmu04137	Mitophagy - animal - Mus musculus (house mouse)	44	0.659825	1.67328	0.000498207	0.00609602	0.00522546	798	tags=30%, list=14%, signal=26%	Ubb/Uba52/Rps27a/Gabarapl2/Ubc/Map1lc3b/Tomm7/Gabarap/Fis1/Jun/Bnip3l/Csnk2b/Kras	Kegg Pathway
CD4+ memory T	GO:0051085	chaperone cofactor-dependent protein refolding	21	-0.727928	-2.17245	0.000102946	0.00754803	0.00702837	294	tags=38%, list=5%, signal=36%	Ptges3/Hspe1/H2-DMb1/H2-DMb2/Dnajb1/Hspa8/Hsph1/Cd74	GO Biological Process
CD4+ memory T	mmu04657	IL-17 signaling pathway - Mus musculus (house mouse)	44	-0.507921	-1.83701	0.000738322	0.00822876	0.00705362	248	tags=23%, list=4%, signal=22%	Hsp90b1/Tab2/Ikbkb/Hsp90ab1/Srsf1/Nfkb1/Lcn2/Hsp90aa1/S100a9/S100a8	Kegg Pathway
CD4+ memory T	mmu00010	Glycolysis / Gluconeogenesis - Mus musculus (house mouse)	24	0.749467	1.76146	0.000750506	0.00822876	0.00705362	685	tags=46%, list=12%, signal=41%	Gapdh/Aldoa/Eno1/Ldha/Pkm/Tpi1/Pgk1/Akr1a1/Pgam1/Adh5/Ldhb	Kegg Pathway
CD4+ memory T	GO:0140053	mitochondrial gene expression	99	0.600115	1.64664	0.000140665	0.0101831	0.00948198	1763	tags=62%, list=29%, signal=44%	Ndufa7/Lars2/Mrpl52/Mrpl54/Mrpl33/Mrps16/Mrps18c/Mrps24/Aurkaip1/Mrps14/Hsd17b10/Mrpl57/Mrpl23/Coa3/Mrpl43/Mrpl58/Mrpl18/Mrpl20/Mrps34/Uqcc2/Mrps33/Mrps21/Mrpl30/Mrpl17/Mrpl42/Mrpl15/Mrpl14/Mrpl21/Mrpl27/Mrps18a/Mrps17/Mrpl51/Mrpl36/Mrpl40/Mrpl35/Mrps26/Chchd1/Mrps15/Mrpl55/Malsu1/Mrps6/Mrps5/Mrpl32/Mthfs/Mrpl34/Mrpl46/Mrpl13/Mrps9/Tfam/Mrpl24/Mpv17l2/Mrps28/Mrpl41/Gars/Mrps18b/C1qbp/Mrpl11/Mrpl1…	GO Biological Process
CD4+ memory T	GO:0004129	cytochrome-c oxidase activity	10	0.88304	1.7471	0.000313411	0.0112016	0.0100316	407	tags=80%, list=7%, signal=75%	Cox8a/Cox7b/Cox6c/Cox7c/Cox7a2/Cox5a/Cox4i1/Cox7a2l	GO Molecular Function
CD4+ memory T	GO:0098631	cell adhesion mediator activity	8	0.900031	1.72552	0.000392354	0.0131351	0.0117632	556	tags=88%, list=9%, signal=80%	Rpsa/Emb/Itgb1/Bsg/Cd47/Cd200/Ppp1ca	GO Molecular Function
CD4+ memory T	GO:0030888	regulation of B cell proliferation	42	-0.571575	-2.02627	0.000188491	0.0133084	0.0123921	741	tags=55%, list=12%, signal=48%	Tnfrsf13b/Nckap1l/Bcl6/Inpp5d/Il21/Clcf1/Ikzf3/Rc3h1/Pten/Btla/Cd24a/Lyn/Cd38/Peli1/Mzb1/Blk/Siglecg/Tnfrsf13c/Cd22/Mef2c/Ighd/Ighm/Cd74	GO Biological Process
CD4+ memory T	GO:0001945	lymph vessel development	8	-0.872698	-2.06039	0.000200936	0.014014	0.0130492	365	tags=62%, list=6%, signal=59%	Ppp3cb/Heg1/Nfatc1/Syk/Ngp	GO Biological Process
CD4+ memory T	GO:0051444	negative regulation of ubiquitin-protein transferase activity	10	0.879377	1.74799	0.000213441	0.0147069	0.0136944	305	tags=50%, list=5%, signal=48%	Rpl11/Rps7/Rpl23/Park7/Rpl5	GO Biological Process
CD4+ memory T	GO:0072160	nephron tubule epithelial cell differentiation	5	-0.943732	-1.92566	0.000219656	0.0149549	0.0139253	344	tags=100%, list=6%, signal=94%	Cd24a/Gata3/Mtss1/Mef2c	GO Biological Process
CD4+ memory T	GO:0002544	chronic inflammatory response	7	-0.896363	-2.05589	0.000291708	0.0193986	0.0180631	11	tags=43%, list=0%, signal=43%	Lta/Camp/S100a9	GO Biological Process
CD4+ memory T	GO:0002523	leukocyte migration involved in inflammatory response	6	-0.914635	-2.01565	0.000308118	0.0200241	0.0186455	261	tags=50%, list=4%, signal=48%	Cd24a/S100a9/S100a8	GO Biological Process
CD4+ memory T	GO:0051881	regulation of mitochondrial membrane potential	45	0.67376	1.72078	0.000353822	0.022736	0.0211707	791	tags=36%, list=13%, signal=31%	Ubb/Clic1/Tspo/Atp5g1/Park7/Prelid1/Rack1/Bax/Arl6ip5/Ndufs4/Atpif1/Casp1/Ndufc2/Bnip3l/Sod2/Bcl2	GO Biological Process
CD4+ memory T	GO:0042989	sequestering of actin monomers	5	0.942622	1.64989	0.000358655	0.0227905	0.0212214	109	tags=60%, list=2%, signal=59%	Tmsb10/Pfn1/Tmsb4x	GO Biological Process
CD4+ memory T	GO:0001216	DNA-binding transcription activator activity	146	-0.335901	-1.52943	0.000779833	0.0228042	0.0204224	543	tags=18%, list=9%, signal=17%	Elk4/Zfp445/Elf1/Ikzf3/Zeb2/Nfatc3/Mga/Tcf12/Sp1/Mef2a/Pbx2/Egr3/Irf4/Dmtf1/Atf4/Mef2d/Spib/Gata3/Nfat5/Nfkb1/Tcf4/Pou2f2/Nfatc1/Pax5/Ebf1/Mef2c	GO Molecular Function
CD4+ memory T	GO:0001228	DNA-binding transcription activator activity, RNA polymerase II-specific	146	-0.335901	-1.52943	0.000779833	0.0228042	0.0204224	543	tags=18%, list=9%, signal=17%	Elk4/Zfp445/Elf1/Ikzf3/Zeb2/Nfatc3/Mga/Tcf12/Sp1/Mef2a/Pbx2/Egr3/Irf4/Dmtf1/Atf4/Mef2d/Spib/Gata3/Nfat5/Nfkb1/Tcf4/Pou2f2/Nfatc1/Pax5/Ebf1/Mef2c	GO Molecular Function
CD4+ memory T	GO:0090263	positive regulation of canonical Wnt signaling pathway	40	-0.531675	-1.8759	0.000364731	0.0229219	0.0213438	725	tags=28%, list=12%, signal=24%	Tbl1xr1/Usp47/Csnk1d/Map3k1/Zeb2/Tnks2/Lrrk2/Ddx3x/Wnk1/Xiap/Nfkb1	GO Biological Process
CD4+ memory T	GO:0032944	regulation of mononuclear cell proliferation	125	-0.367686	-1.62787	0.000378992	0.023306	0.0217014	377	tags=30%, list=6%, signal=28%	Il21/Il2ra/Clcf1/Tmem131l/Scrib/Ikzf3/Rc3h1/Pten/Ctnnb1/Cd28/Itch/Btla/Tnfrsf1b/Cd24a/Laptm5/Lyn/H2-DMb1/Cd55/Twsg1/Rassf5/Cd38/Peli1/Mzb1/Ptpn6/Ppp3ca/Itgal/Blk/H2-DMb2/Siglecg/Tnfrsf13c/Cd22/Syk/Mef2c/Ighd/H2-Aa/Ighm/Cd74	GO Biological Process
CD4+ memory T	GO:0070003	threonine-type peptidase activity	13	0.830624	1.74181	0.00082966	0.0235477	0.0210883	674	tags=77%, list=11%, signal=68%	Psmb8/Psmb1/Psmb10/Psmb3/Psmb2/Psmb6/Psmb5/Psma4/Psmb9/Psmb7	GO Molecular Function
CD4+ memory T	GO:0003955	NAD(P)H dehydrogenase (quinone) activity	14	0.817537	1.74357	0.00103756	0.0263485	0.0235965	689	tags=71%, list=11%, signal=63%	Ndufa7/Ndufb7/Ndufb8/Ndufa2/Ndufs4/Ndufv2/Ndufc2/Ndufs7/Ndufs3/Ndufs8	GO Molecular Function
CD4+ memory T	GO:0008137	NADH dehydrogenase (ubiquinone) activity	14	0.817537	1.74357	0.00103756	0.0263485	0.0235965	689	tags=71%, list=11%, signal=63%	Ndufa7/Ndufb7/Ndufb8/Ndufa2/Ndufs4/Ndufv2/Ndufc2/Ndufs7/Ndufs3/Ndufs8	GO Molecular Function
CD4+ memory T	GO:0050136	NADH dehydrogenase (quinone) activity	14	0.817537	1.74357	0.00103756	0.0263485	0.0235965	689	tags=71%, list=11%, signal=63%	Ndufa7/Ndufb7/Ndufb8/Ndufa2/Ndufs4/Ndufv2/Ndufc2/Ndufs7/Ndufs3/Ndufs8	GO Molecular Function
CD4+ memory T	mmu04612	Antigen processing and presentation - Mus musculus (house mouse)	45	-0.451187	-1.63834	0.0026613	0.028173	0.0241497	177	tags=27%, list=3%, signal=26%	H2-DMb1/Psme2b/Hsp90ab1/Ciita/H2-DMb2/H2-Ob/Hspa8/H2-Eb1/H2-Ab1/Hsp90aa1/H2-Aa/Cd74	Kegg Pathway
CD4+ memory T	GO:0035924	cellular response to vascular endothelial growth factor stimulus	19	-0.70031	-2.03553	0.000480328	0.0286145	0.0266445	410	tags=37%, list=7%, signal=34%	Nus1/Myo1c/Xbp1/Egr3/Ptp4a3/Notch1/Tcf4	GO Biological Process
CD4+ memory T	GO:0010001	glial cell differentiation	76	-0.438506	-1.76568	0.000489177	0.0288413	0.0268556	379	tags=32%, list=6%, signal=30%	Mbd1/Mapk1/Mecp2/Ptprj/Kdm4a/Egr2/Lrp6/Nrros/Prmt5/Stat3/Clcf1/Ppp3r1/Dicer1/Wdr1/Pten/Ctnnb1/Tnfrsf1b/Cxcr4/Notch1/Dtx1/Sod1/Grk2/S100a9/S100a8	GO Biological Process
CD4+ memory T	GO:0140353	lipid export from cell	11	0.85349	1.72613	0.000507858	0.0296371	0.0275967	153	tags=27%, list=3%, signal=27%	Tspo/Mif/Atp5j	GO Biological Process
CD4+ memory T	GO:0004553	hydrolase activity, hydrolyzing O-glycosyl compounds	24	-0.624907	-1.9293	0.00125239	0.030214	0.0270583	902	tags=38%, list=15%, signal=32%	Lyz2/Mogs/Hexa/Man2a2/Ganab/Man2a1/Edem1/Chil3/Man1a	GO Molecular Function
CD4+ memory T	GO:0030856	regulation of epithelial cell differentiation	44	-0.519634	-1.85087	0.000580283	0.0331864	0.0309016	433	tags=36%, list=7%, signal=34%	Rock1/Ptch1/Sgpp1/Zeb2/Dicer1/Ctnnb1/Rock2/Srsf6/Cd24a/Notch1/Zfp36/Gata3/Numa1/Ikbkb/Foxp1/Zfp36l1	GO Biological Process
CD4+ memory T	mmu05170	Human immunodeficiency virus 1 infection - Mus musculus (house mouse)	129	0.523038	1.43937	0.00324573	0.0332147	0.0284714	798	tags=26%, list=14%, signal=23%	Cd3g/Elob/Cd3d/H2-D1/Nfkbia/Rac2/H2-Q4/Gng5/Cd3e/Calm1/H2-Q7/Cfl1/Rbx1/H2-K1/Gnai2/Bax/Pdia3/H2-T23/Calm2/Bst2/Prkca/Cd247/Cd4/Jun/Calr/Fos/Rac1/B2m/Cycs/Gng10/Bcl2/H2-T22/Kras	Kegg Pathway
CD4+ memory T	GO:0046889	positive regulation of lipid biosynthetic process	27	-0.590706	-1.8884	0.000614942	0.0348203	0.032423	1157	tags=44%, list=19%, signal=36%	Abcd1/Elovl5/Chp1/Srebf2/Lpgat1/Creb1/Abcg1/Crebl2/Igf1r/Prkcd/Zbtb20/Cd74	GO Biological Process
CD4+ memory T	GO:0004888	transmembrane signaling receptor activity	101	-0.359533	-1.46339	0.00157173	0.0369931	0.0331294	308	tags=20%, list=5%, signal=19%	Igf1r/Tnfrsf1b/Fcrl1/Cxcr4/P2ry10/Il2rb/Clec2d/Notch1/Ctsh/Fcrla/Ptpn6/Itgal/Cd72/Fcmr/H2-Eb1/Cr2/Cd79b/Ighm/Cd79a/Cd74	GO Molecular Function
CD4+ memory T	mmu04640	Hematopoietic cell lineage - Mus musculus (house mouse)	37	-0.495305	-1.69797	0.00378012	0.0374354	0.0320893	318	tags=41%, list=5%, signal=39%	H2-Oa/Cd24a/H2-DMb1/Cd55/Cd38/H2-DMb2/Fcer2a/Cd22/H2-Ob/H2-Eb1/Cd19/Cr2/H2-Ab1/H2-Aa/Ms4a1	Kegg Pathway
CD4+ memory T	GO:0007141	male meiosis I	5	0.93274	1.63259	0.000699891	0.0384873	0.0358375	3	tags=20%, list=0%, signal=20%	Ubb	GO Biological Process
CD4+ memory T	GO:0010837	regulation of keratinocyte proliferation	11	-0.78212	-2.02576	0.000743468	0.0401122	0.0373506	1105	tags=73%, list=18%, signal=59%	Notch2/Bcl11b/Ptch1/Ift80/Srsf6/Zfp36/Zfp36l1/Nfatc1	GO Biological Process
CD4+ memory T	GO:0034138	toll-like receptor 3 signaling pathway	8	-0.847114	-1.99999	0.000763241	0.0407942	0.0379856	298	tags=38%, list=5%, signal=36%	Ubqln1/Peli1/Unc93b1	GO Biological Process
CD4+ memory T	mmu05321	Inflammatory bowel disease - Mus musculus (house mouse)	29	-0.550561	-1.78773	0.00434809	0.0417145	0.0357573	177	tags=45%, list=3%, signal=44%	Stat3/Il21r/Il21/H2-Oa/H2-DMb1/Gata3/Nfkb1/H2-DMb2/Nfatc1/H2-Ob/H2-Eb1/H2-Ab1/H2-Aa	Kegg Pathway
CD4+ memory T	GO:0002791	regulation of peptide secretion	72	-0.417263	-1.64819	0.000827127	0.0430031	0.0400424	125	tags=15%, list=2%, signal=15%	Selenot/Tcirg1/Ppp3cb/Cd38/Ppp3ca/Tardbp/Blk/Serp1/S100a9/S100a8/Cd74	GO Biological Process
CD4+ memory T	GO:0090087	regulation of peptide transport	72	-0.417263	-1.64819	0.000827127	0.0430031	0.0400424	125	tags=15%, list=2%, signal=15%	Selenot/Tcirg1/Ppp3cb/Cd38/Ppp3ca/Tardbp/Blk/Serp1/S100a9/S100a8/Cd74	GO Biological Process
CD4+ memory T	GO:2000273	positive regulation of signaling receptor activity	13	0.826946	1.72554	0.000843649	0.0434669	0.0404743	569	tags=46%, list=9%, signal=42%	Park7/Cfl1/Itgb1/Ifngr1/Rwdd1/Ccr2	GO Biological Process
CD4+ memory T	GO:1901135	carbohydrate derivative metabolic process	366	0.468383	1.34226	0.000929623	0.0470488	0.0438096	894	tags=23%, list=15%, signal=21%	Gapdh/Nme2/Itm2b/Tspo/Aldoa/Atp5g1/Eno1/Ndufa13/Dad1/Atp5j2/Atp5d/Ost4/Atp5g2/Atp5j/Ndufa7/Hint1/Pkm/Krtcap2/Atp5c1/Atp5e/Ndufv3/Atp5h/Atp5l/Atp5b/Atp5o/Tmem258/Ndufa3/Nt5c/Ndufb7/Ndufb4/Bax/Atp5k/Ndufa1/Ndufa12/Rora/Ccnd3/Ndufb8/Ndufa2/Ndufa11/Ndufb11/Tpi1/Ndufb9/Ndufa5/Sdhb/Ndufs4/Ndufa8/Ndufs5/Ndufv2/Pgls/Ramp1/Ndufb5/Atpif1/Tmem59/Dpm1/Fis1/Eif6/Dpm3/Gimap7/Aprt/Ndufc2/Rhoa/Nme1/Pgk1/Mpc2/Ndu…	GO Biological Process

## Sheet: CD4+ T_pathway
ClusterID	ID	Description	setSize	enrichmentScore	NES	pvalue	p.adjust	qvalue	rank	leading_edge	core_enrichment	PathwayDB
CD4+ T	mmu05171	Coronavirus disease - COVID-19 - Mus musculus (house mouse)	125	0.918104	2.19511	1e-10	2.66364e-09	2.45933e-09	202	tags=65%, list=4%, signal=64%	Uba52/Rpl10/Rpl15/Rpl32/Rplp0/Rps18/Rps15a/Rps7/Rpl34/Rps3/Rps2/Rpl28/Rps11/Rpl24/Rpl36/Rpl21/Rpl11/Rpl35/Rpl10a/Rpl9/Rps4x/Rpl39/Rps5/Fau/Rps27a/Rpl3/Rpl13/Rpl14/Rps10/Rpl6/Rpl8/Rpl19/Rps13/Rpl18a/Rpl26/Rpl37/Rpl12/Rpl17/Rpl27a/Rpl18/Rps20/Rps24/Rps25/Rpl30/Rpl23/Rps16/Rpl7/Rpl27/Rps19/Rps23/Rps27/Rpsa/Rpl22l1/Rps3a1/Rps21/Rps29/Rpl7a/Rpl38/Rps8/Rps14/Rps26/Rps28/Rpl13a/Rpl41/Rpl5/Rplp1/Rpl22/Rp…	Kegg Pathway
CD4+ T	mmu03010	Ribosome - Mus musculus (house mouse)	120	0.889202	2.12445	1e-10	2.66364e-09	2.45933e-09	202	tags=67%, list=4%, signal=66%	Uba52/Rpl10/Rpl15/Rpl32/Rplp0/Rps18/Rps15a/Rps7/Rpl34/Rps3/Rps2/Rpl28/Rps11/Rpl24/Rpl36/Rpl21/Rpl11/Rpl35/Rpl10a/Rpl9/Rps4x/Rpl39/Rps5/Fau/Rps27a/Rpl3/Rpl13/Rpl14/Rps10/Rpl6/Rpl8/Rpl19/Rps13/Rpl18a/Rpl26/Rpl37/Rpl12/Rpl17/Rpl27a/Rpl18/Rps20/Rps24/Rps25/Rpl30/Rpl23/Rps16/Rpl7/Rpl27/Rps19/Rps23/Rps27/Rpsa/Rpl22l1/Rps3a1/Rps21/Rps29/Rpl7a/Rpl38/Rps8/Rps14/Rps26/Rps28/Rpl13a/Rpl41/Rpl5/Rplp1/Rpl22/Rp…	Kegg Pathway
CD4+ T	mmu00190	Oxidative phosphorylation - Mus musculus (house mouse)	94	0.73943	1.75608	1e-10	2.66364e-09	2.45933e-09	1013	tags=74%, list=20%, signal=61%	Cox8a/Atp5g2/Cox6c/Atp5e/Cox5b/Atp5g1/Cox7c/Ndufa13/Cox6b1/Cox4i1/Atp5j/Cox7a2/Atp5l/Ndufa4/Atp5b/Cox7b/Atp5c1/Atp5h/Cox7a2l/Atp5j2/Atp5d/Uqcr10/Ndufa3/Ndufa7/Ndufb11/Uqcrb/Ndufa6/Ndufb5/Atp6v1f/Ndufb9/Ndufa11/Ndufa2/Ndufa1/Ndufs4/Uqcrh/Cox5a/Ndufb7/Atp5o/Ndufb4/Sdhb/Atp5g3/Ndufa5/Ndufc2/Ndufa12/Ndufb10/Uqcrq/Ndufv3/Atp5k/Atp6v0e/Ndufv2/Ndufs5/Ndufa8/Ndufb8/Uqcr11/Ndufab1/Uqcrfs1/Ndufb2/Ndufs7/At…	Kegg Pathway
CD4+ T	mmu05012	Parkinson disease - Mus musculus (house mouse)	160	0.713671	1.72076	1e-10	2.66364e-09	2.45933e-09	1032	tags=66%, list=20%, signal=54%	Uba52/Ubb/Rps27a/Cox8a/Atp5g2/Cox6c/Atp5e/Cox5b/Atp5g1/Cox7c/Ndufa13/Calm1/Cox6b1/Cox4i1/Psma2/Atp5j/Cox7a2/Ndufa4/Atp5b/Cox7b/Psmb1/Atp5c1/Atp5h/Cox7a2l/Park7/Atp5d/Uqcr10/Ndufa3/Gnai2/Ndufa7/Psma7/Ndufb11/Uqcrb/Ndufa6/Ndufb5/Gnas/Sem1/Ndufb9/Slc25a4/Psmb3/Psmb2/Slc25a5/Ndufa11/Ndufa2/Ndufa1/Ndufs4/Uqcrh/Psmb6/Cox5a/Ndufb7/Atp5o/Psma3/Psma4/Ndufb4/Calm2/Vdac2/Psmb5/Sdhb/Atp5g3/Ndufa5/Ndufc2/Nduf…	Kegg Pathway
CD4+ T	mmu05208	Chemical carcinogenesis - reactive oxygen species - Mus musculus (house mouse)	129	0.699489	1.67413	1e-10	2.66364e-09	2.45933e-09	1014	tags=57%, list=20%, signal=47%	Cyba/Cox8a/Atp5g2/Cox6c/Atp5e/Nfkbia/Cox5b/Atp5g1/Cox7c/Ndufa13/Cox6b1/Cox4i1/Atp5j/Cox7a2/Ndufa4/Atp5b/Cox7b/Atp5c1/Atp5h/Cox7a2l/Atp5d/Uqcr10/Ndufa3/Ndufa7/Ndufb11/Uqcrb/Ndufa6/Ndufb5/Ndufb9/Slc25a4/Slc25a5/Ndufa11/Ndufa2/Ndufa1/Ndufs4/Uqcrh/Cox5a/Ndufb7/Atp5o/Jun/Ndufb4/Vdac2/Sdhb/Atp5g3/Ndufa5/Ndufc2/Ndufa12/Ndufb10/Uqcrq/Ndufv3/Ndufv2/Ndufs5/Ndufa8/Ndufb8/Rac1/Uqcr11/Ndufab1/Map2k2/Uqcrfs1/N…	Kegg Pathway
CD4+ T	mmu05415	Diabetic cardiomyopathy - Mus musculus (house mouse)	122	0.696674	1.66404	1e-10	2.66364e-09	2.45933e-09	1013	tags=60%, list=20%, signal=49%	Cyba/Cox8a/Gapdh/Atp5g2/Cox6c/Atp5e/Cox5b/Atp5g1/Cox7c/Ndufa13/Cox6b1/Cox4i1/Atp5j/Cox7a2/Rac2/Ndufa4/Atp5b/Cox7b/Atp5c1/Atp5h/Cox7a2l/Atp5d/Uqcr10/Ndufa3/Ndufa7/Ndufb11/Uqcrb/Ndufa6/Ndufb5/Ndufb9/Slc25a4/Slc25a5/Ndufa11/Ndufa2/Ndufa1/Ndufs4/Uqcrh/Cox5a/Ndufb7/Atp5o/Ndufb4/Vdac2/Sdhb/Atp5g3/Ndufa5/Ndufc2/Ndufa12/Ndufb10/Uqcrq/Ndufv3/Ndufv2/Ndufs5/Ndufa8/Ndufb8/Rac1/Uqcr11/Ndufab1/Uqcrfs1/Ndufb2/N…	Kegg Pathway
CD4+ T	mmu05020	Prion disease - Mus musculus (house mouse)	160	0.689815	1.66324	1e-10	2.66364e-09	2.45933e-09	1032	tags=61%, list=20%, signal=50%	Cyba/Cox8a/Atp5g2/Cox6c/Atp5e/Cox5b/Atp5g1/Cox7c/Ndufa13/Cox6b1/Cox4i1/Psma2/Atp5j/Cox7a2/Rac2/Ndufa4/Atp5b/Cox7b/Psmb1/Atp5c1/Atp5h/Cox7a2l/Atp5d/Uqcr10/Ndufa3/Ndufa7/Psma7/Ndufb11/Uqcrb/Ndufa6/Ndufb5/Sem1/Ndufb9/Slc25a4/Psmb3/Psmb2/Slc25a5/Ndufa11/Ndufa2/Ndufa1/Ndufs4/Uqcrh/Psmb6/Cox5a/Ndufb7/Atp5o/Psma3/Psma4/Ndufb4/Vdac2/Psmb5/Sdhb/Atp5g3/Ndufa5/Ndufc2/Ndufa12/Ndufb10/Uqcrq/Ndufv3/Psmd8/Tubb5…	Kegg Pathway
CD4+ T	mmu05010	Alzheimer disease - Mus musculus (house mouse)	197	0.661233	1.59881	1e-10	2.66364e-09	2.45933e-09	1082	tags=52%, list=21%, signal=43%	Cox8a/Gapdh/Atp5g2/Cox6c/Atp5e/Cox5b/Atp5g1/Cox7c/Ndufa13/Calm1/Cox6b1/Cox4i1/Psma2/Atp5j/Cox7a2/Ndufa4/Atp5b/Cox7b/Psmb1/Atp5c1/Atp5h/Cox7a2l/Atp5d/Uqcr10/Ndufa3/Psenen/Ndufa7/Psma7/Ndufb11/Uqcrb/Ndufa6/Ndufb5/Sem1/Ndufb9/Slc25a4/Psmb3/Psmb2/Slc25a5/Ndufa11/Ndufa2/Ndufa1/Ndufs4/Uqcrh/Psmb6/Cox5a/Ndufb7/Atp5o/Psma3/Psma4/Ndufb4/Calm2/Vdac2/Psmb5/Sdhb/Atp5g3/Ndufa5/Ndufc2/Ndufa12/Ndufb10/Uqcrq/Ndu…	Kegg Pathway
CD4+ T	mmu05022	Pathways of neurodegeneration - multiple diseases - Mus musculus (house mouse)	232	0.653211	1.58892	1e-10	2.66364e-09	2.45933e-09	1082	tags=50%, list=21%, signal=42%	Uba52/Ubb/Rps27a/Cox8a/Atp5g2/Cox6c/Atp5e/Cox5b/Atp5g1/Cox7c/Ndufa13/Calm1/Cox6b1/Cox4i1/Psma2/Atp5j/Cox7a2/Bcl2/Ndufa4/Atp5b/Cox7b/Psmb1/Atp5c1/Atp5h/Cox7a2l/Park7/Atp5d/Uqcr10/Ndufa3/Ndufa7/Map1lc3b/Psma7/Ndufb11/Uqcrb/Ndufa6/Ndufb5/Sem1/Ndufb9/Slc25a4/Psmb3/Psmb2/Slc25a5/Ndufa11/Ndufa2/Ndufa1/Ndufs4/Uqcrh/Psmb6/Cox5a/Ndufb7/Atp5o/Psma3/Psma4/Ndufb4/Calm2/Vdac2/Psmb5/Sdhb/Atp5g3/Ndufa5/Ndufc2/N…	Kegg Pathway
CD4+ T	mmu05016	Huntington disease - Mus musculus (house mouse)	181	0.655008	1.58154	1e-10	2.66364e-09	2.45933e-09	1082	tags=57%, list=21%, signal=46%	Cox8a/Atp5g2/Cox6c/Atp5e/Cox5b/Atp5g1/Cox7c/Ndufa13/Cox6b1/Cox4i1/Psma2/Atp5j/Cox7a2/Ndufa4/Atp5b/Cox7b/Psmb1/Atp5c1/Atp5h/Cox7a2l/Atp5d/Uqcr10/Ndufa3/Clta/Ndufa7/Psma7/Ndufb11/Uqcrb/Ndufa6/Ndufb5/Sem1/Ndufb9/Slc25a4/Psmb3/Psmb2/Slc25a5/Ndufa11/Ndufa2/Ndufa1/Ndufs4/Uqcrh/Psmb6/Cox5a/Ndufb7/Atp5o/Psma3/Psma4/Ndufb4/Vdac2/Psmb5/Sdhb/Atp5g3/Ndufa5/Ndufc2/Ndufa12/Ndufb10/Uqcrq/Ndufv3/Psmd8/Tubb5/Bax/…	Kegg Pathway
CD4+ T	mmu05014	Amyotrophic lateral sclerosis - Mus musculus (house mouse)	202	0.647617	1.56727	1e-10	2.66364e-09	2.45933e-09	1032	tags=51%, list=20%, signal=42%	Cox8a/Pfn1/Atp5g2/Cox6c/Atp5e/Cox5b/Atp5g1/Cox7c/Ndufa13/Cox6b1/Cox4i1/Psma2/Atp5j/Tpr/Cox7a2/Bcl2/Ndufa4/Atp5b/Cox7b/Actb/Psmb1/Atp5c1/Hnrnpa1/Atp5h/Cox7a2l/Atp5d/Hnrnpa3/Uqcr10/Ndufa3/Ndufa7/Map1lc3b/Psma7/Ndufb11/Uqcrb/Ndufa6/Ndufb5/Sem1/Ndufb9/Psmb3/Psmb2/Ndufa11/Ndufa2/Ndufa1/Ndufs4/Uqcrh/Psmb6/Cox5a/Ndufb7/Atp5o/Psma3/Psma4/Ndufb4/Psmb5/Sdhb/Atp5g3/Ndufa5/Ndufc2/Ndufa12/Ndufb10/Uqcrq/Ndufv3…	Kegg Pathway
CD4+ T	GO:0003735	structural constituent of ribosome	139	0.852487	2.06444	1e-10	3.05333e-08	2.86316e-08	204	tags=58%, list=4%, signal=57%	Uba52/Rpl10/Rpl15/Rpl32/Rplp0/Rps18/Rps15a/Rps7/Rpl34/Rps3/Rps2/Rpl28/Rps11/Rpl24/Rpl36/Rpl21/Rpl11/Rpl35/Rpl10a/Rpl9/Rps4x/Rpl39/Rps5/Fau/Rps27a/Rpl3/Rpl13/Rpl14/Rps10/Rpl6/Rpl8/Rpl19/Rps13/Rpl18a/Rpl26/Rpl37/Rpl12/Rpl17/Rpl27a/Rpl18/Rps20/Rps24/Rps25/Rpl30/Rpl23/Rps16/Rpl7/Rpl27/Rps19/Rps23/Rps27/Rpsa/Rpl22l1/Rps3a1/Rps21/Rps29/Rpl7a/Rpl38/Rps8/Rps14/Rps26/Rps28/Rpl13a/Rpl41/Rpl5/Rplp1/Rpl22/Rp…	GO Molecular Function
CD4+ T	GO:0005198	structural molecule activity	197	0.814625	1.98898	1e-10	3.05333e-08	2.86316e-08	405	tags=50%, list=8%, signal=48%	Uba52/Rpl10/Rpl15/Rpl32/Rplp0/Rps18/Rps15a/Rps7/Rpl34/Rps3/Rps2/Rpl28/Rps11/Rpl24/Rpl36/Rpl21/Rpl11/Rpl35/Rpl10a/Rpl9/Rps4x/Rpl39/Rps5/Fau/Rps27a/Rpl3/Rpl13/Rpl14/Rps10/Rpl6/Rpl8/Rpl19/Rps13/Rpl18a/Rpl26/Rpl37/Rpl12/Rpl17/Rpl27a/Rpl18/Rps20/Rps24/Rps25/Rpl30/Rpl23/Rps16/Rpl7/Rpl27/Rps19/Rps23/Rps27/Rpsa/Rpl22l1/Rps3a1/Rps21/Rps29/Rpl7a/Rpl38/Rps8/Rps14/Rps26/Rps28/Rpl13a/Rpl41/Rpl5/Rplp1/Rpl22/Rp…	GO Molecular Function
CD4+ T	GO:0019843	rRNA binding	54	0.842749	1.96047	1e-10	3.05333e-08	2.86316e-08	313	tags=54%, list=6%, signal=51%	Rplp0/Rps18/Rps3/Rps11/Rpl11/Rpl9/Rps4x/Rps5/Rpl3/Rpl6/Rpl8/Rpl19/Rps13/Rpl37/Rpl12/Rpl17/Rpl23/Rpl7/Rps14/Rpl5/Rps9/Npm1/Rpl4/Eef2/Rpl37a/Rpl23a/Ncl/Cirbp/Nop53	GO Molecular Function
CD4+ T	GO:0002181	cytoplasmic translation	119	0.893634	2.15388	1e-10	1.073e-07	1.04989e-07	231	tags=66%, list=4%, signal=65%	Uba52/Rpl15/Rpl32/Rplp0/Rps18/Rps15a/Rps7/Rpl34/Rps3/Rps2/Rpl28/Rps11/Rpl24/Rpl36/Rpl21/Rpl11/Rpl10a/Rpl9/Rps4x/Rpl39/Rps5/Fau/Rps27a/Rpl3/Rpl13/Rpl14/Rps10/Rpl6/Rpl8/Rpl19/Rps13/Rpl18a/Rpl26/Rpl12/Rpl17/Rpl27a/Rpl18/Rps20/Rps24/Rps25/Rpl30/Rpl23/Rps16/Rpl7/Rpl27/Rps19/Rps23/Rpsa/Rpl22l1/Rps3a1/Rps21/Rps29/Rpl7a/Rpl38/Rps8/Rps14/Rps26/Rps28/Rpl13a/Rpl41/Rpl5/Rplp1/Rpl22/Rpl35a/Rpl36a/Rps6/Rpl29/R…	GO Biological Process
CD4+ T	GO:0006412	translation	401	0.688948	1.70155	1e-10	1.073e-07	1.04989e-07	419	tags=29%, list=8%, signal=29%	Uba52/Rpl10/Rpl15/Rpl32/Rplp0/Rps18/Rps15a/Rps7/Rpl34/Rps3/Rps2/Rpl28/Rps11/Rpl24/Rpl36/Rpl21/Rpl11/Rpl35/Rpl10a/Rpl9/Rps4x/Rpl39/Rps5/Fau/Rps27a/Rpl3/Rpl13/Rpl14/Rps10/Rpl6/Rpl8/Rpl19/Rps13/Rbm3/Rpl18a/Rpl26/Rpl37/Rpl12/Rpl17/Rpl27a/Rpl18/Rps20/Rps24/Rps25/Rpl30/Rpl23/Rps16/Eef1b2/Rpl7/Eef1a1/Rpl27/Rps19/Rps23/Rpsa/Rpl22l1/Rps3a1/Rps21/Rps29/Rack1/Rpl7a/Rpl38/Rps8/Rps14/Rps26/Gapdh/Rps28/Rpl13a/…	GO Biological Process
CD4+ T	GO:0043043	peptide biosynthetic process	407	0.685704	1.69378	1e-10	1.073e-07	1.04989e-07	419	tags=28%, list=8%, signal=28%	Uba52/Rpl10/Rpl15/Rpl32/Rplp0/Rps18/Rps15a/Rps7/Rpl34/Rps3/Rps2/Rpl28/Rps11/Rpl24/Rpl36/Rpl21/Rpl11/Rpl35/Rpl10a/Rpl9/Rps4x/Rpl39/Rps5/Fau/Rps27a/Rpl3/Rpl13/Rpl14/Rps10/Rpl6/Rpl8/Rpl19/Rps13/Rbm3/Rpl18a/Rpl26/Rpl37/Rpl12/Rpl17/Rpl27a/Rpl18/Rps20/Rps24/Rps25/Rpl30/Rpl23/Rps16/Eef1b2/Rpl7/Eef1a1/Rpl27/Rps19/Rps23/Rpsa/Rpl22l1/Rps3a1/Rps21/Rps29/Rack1/Rpl7a/Rpl38/Rps8/Rps14/Rps26/Gapdh/Rps28/Rpl13a/…	GO Biological Process
CD4+ T	GO:0006518	peptide metabolic process	462	0.668601	1.65497	1e-10	1.073e-07	1.04989e-07	429	tags=27%, list=8%, signal=27%	Uba52/Rpl10/Rpl15/Rpl32/Rplp0/Rps18/Rps15a/Rps7/Rpl34/Rps3/Rps2/Rpl28/Rps11/Rpl24/Rpl36/Rpl21/Rpl11/Rpl35/Rpl10a/Rpl9/Rps4x/Rpl39/Rps5/Fau/Rps27a/Rpl3/Rpl13/Rpl14/Rps10/Rpl6/Rpl8/Rpl19/Rps13/Rbm3/Rpl18a/Rpl26/Rpl37/Rpl12/Rpl17/Rpl27a/Hbb-bt/Rpl18/Rps20/Rps24/Rps25/Rpl30/Rpl23/Rps16/Eef1b2/Rpl7/Eef1a1/Rpl27/Rps19/Rps23/Rpsa/Rpl22l1/Rps3a1/Rps21/Rps29/Rack1/Rpl7a/Rpl38/Rps8/Rps14/Rps26/Gapdh/Rps28/…	GO Biological Process
CD4+ T	GO:0043604	amide biosynthetic process	441	0.66862	1.65415	1e-10	1.073e-07	1.04989e-07	419	tags=26%, list=8%, signal=26%	Uba52/Rpl10/Rpl15/Rpl32/Rplp0/Rps18/Rps15a/Rps7/Rpl34/Rps3/Rps2/Rpl28/Rps11/Rpl24/Rpl36/Rpl21/Rpl11/Rpl35/Rpl10a/Rpl9/Rps4x/Rpl39/Rps5/Fau/Rps27a/Rpl3/Rpl13/Rpl14/Rps10/Rpl6/Rpl8/Rpl19/Rps13/Rbm3/Rpl18a/Rpl26/Rpl37/Rpl12/Rpl17/Rpl27a/Rpl18/Rps20/Rps24/Rps25/Rpl30/Rpl23/Rps16/Eef1b2/Rpl7/Eef1a1/Rpl27/Rps19/Rps23/Rpsa/Rpl22l1/Rps3a1/Rps21/Rps29/Rack1/Rpl7a/Rpl38/Rps8/Rps14/Rps26/Gapdh/Rps28/Rpl13a/…	GO Biological Process
CD4+ T	mmu04714	Thermogenesis - Mus musculus (house mouse)	127	0.668561	1.59888	8.20178e-09	2.0026e-07	1.849e-07	1028	tags=57%, list=20%, signal=46%	Cox8a/Atp5g2/Cox6c/Atp5e/Rps6/Cox5b/Atp5g1/Cox7c/Ndufa13/Cox6b1/Cox4i1/Atp5j/Cox7a2/Atp5l/Ndufa4/Atp5b/Cox7b/Actb/Atp5c1/Atp5h/Cox7a2l/Atp5j2/Atp5d/Uqcr10/Ndufa3/Ndufa7/Ndufb11/Uqcrb/Ndufa6/Ndufb5/Gnas/Ndufb9/Ndufa11/Ndufa2/Ndufa1/Ndufs4/Uqcrh/Cox5a/Ndufb7/Atp5o/Ndufb4/Sdhb/Atp5g3/Ndufa5/Ndufc2/Ndufa12/Ndufb10/Uqcrq/Ndufv3/Atp5k/Cox16/Ndufv2/Ndufs5/Ndufa8/Ndufb8/Uqcr11/Ndufab1/Uqcrfs1/Ndufb2/Nduf…	Kegg Pathway
CD4+ T	GO:0042255	ribosome assembly	40	0.827026	1.88171	1.2488e-09	1.11664e-06	1.09259e-06	325	tags=45%, list=6%, signal=42%	Rpl10/Rplp0/Rps2/Rpl24/Rpl11/Rps5/Rpl6/Rps25/Rps19/Rps27/Rpsa/Rpl38/Rps14/Rps28/Rpl5/Rpl23a/Nop53/Rps15	GO Biological Process
CD4+ T	mmu04932	Non-alcoholic fatty liver disease - Mus musculus (house mouse)	99	0.684272	1.62897	6.65911e-08	1.50086e-06	1.38574e-06	1082	tags=61%, list=21%, signal=49%	Cox8a/Cox6c/Cox5b/Cox7c/Ndufa13/Cox6b1/Cox4i1/Cox7a2/Ndufa4/Cox7b/Cox7a2l/Uqcr10/Ndufa3/Ndufa7/Ndufb11/Uqcrb/Ndufa6/Ndufb5/Ndufb9/Ndufa11/Ndufa2/Ndufa1/Ndufs4/Uqcrh/Cox5a/Ndufb7/Jun/Ndufb4/Sdhb/Ndufa5/Ndufc2/Ndufa12/Ndufb10/Uqcrq/Ndufv3/Bax/Socs3/Ndufv2/Ndufs5/Ndufa8/Ndufb8/Rac1/Uqcr11/Ndufab1/Uqcrfs1/Ndufb2/Ndufs7/Eif2s1/Ndufb3/Cycs/Ndufs3/Gsk3b/Cdc42/Ndufc1/Ndufs2/Uqcrc1/Uqcrc2/Cox6a1/Casp8/Ndu…	Kegg Pathway
CD4+ T	GO:0006119	oxidative phosphorylation	88	0.714258	1.70292	2.98954e-09	2.29127e-06	2.24193e-06	1030	tags=70%, list=20%, signal=57%	Atp5e/Cox5b/Cox7c/Ndufa13/Cox4i1/Atp5j/Cox7a2/Atp5b/Chchd2/Atp5c1/Atp5h/Cox7a2l/Park7/Atp5j2/Atp5d/Uqcr10/Ndufa3/Ndufa7/Ndufb11/Uqcrb/Ndufa6/Ndufb5/Rhoa/Ndufb9/Ndufa11/Ndufa2/Ndufa1/Ndufs4/Uqcrh/Cox5a/Ndufb7/Atp5o/Ndufb4/Sdhb/Ndufa5/Ndufc2/Ndufa12/Ndufb10/Uqcrq/Ndufv3/Atp5k/Ndufv2/Ndufs5/Ndufa8/Ndufb8/Uqcr11/Dguok/Ndufab1/Uqcc2/Uqcrfs1/Ndufb2/Dnajc15/Ndufs7/Ndufb3/Cycs/Ndufs3/Atp5a1/Ndufc1/Ndufs2…	GO Biological Process
CD4+ T	GO:0009144	purine nucleoside triphosphate metabolic process	121	0.66969	1.61499	4.20926e-09	2.82284e-06	2.76205e-06	973	tags=52%, list=19%, signal=43%	Nme2/Gapdh/Atp5g2/Atp5e/Atp5g1/Ndufa13/Eno1/Atp5j/Atp5l/Tspo/Atp5b/Atp5c1/Atp5h/Atp5j2/Atp5d/Ndufa3/Ndufa7/Ndufb11/Ndufa6/Nme1/Ndufb5/Rhoa/Aldoa/Ndufb9/Ndufa11/Ran/Ndufa2/Ndufa1/Ndufs4/Ndufb7/Atp5o/Pkm/Fis1/Ndufb4/Sdhb/Atp5g3/Ndufa5/Ndufc2/Ndufa12/Ndufb10/Ndufv3/Atp5k/Atpif1/Eif6/Samhd1/Ndufv2/Ndufs5/Ndufa8/Ndufb8/Dguok/Ndufab1/Ndufb2/Ndufs7/Ola1/Gpi1/Ndufb3/Impdh2/Ndufs3/Adk/Atp5a1/Ndufc1/Gimap9…	GO Biological Process
CD4+ T	GO:0009145	purine nucleoside triphosphate biosynthetic process	71	0.738821	1.74456	6.45845e-09	3.1813e-06	3.1128e-06	973	tags=73%, list=19%, signal=60%	Nme2/Atp5g2/Atp5e/Atp5g1/Ndufa13/Eno1/Atp5j/Atp5l/Atp5b/Atp5c1/Atp5h/Atp5j2/Atp5d/Ndufa3/Ndufa7/Ndufb11/Ndufa6/Nme1/Ndufb5/Aldoa/Ndufb9/Ndufa11/Ndufa2/Ndufa1/Ndufs4/Ndufb7/Atp5o/Pkm/Ndufb4/Sdhb/Atp5g3/Ndufa5/Ndufc2/Ndufa12/Ndufb10/Ndufv3/Atp5k/Ndufv2/Ndufs5/Ndufa8/Ndufb8/Dguok/Ndufab1/Ndufb2/Ndufs7/Ndufb3/Impdh2/Ndufs3/Adk/Atp5a1/Ndufc1/Ndufs2	GO Biological Process
CD4+ T	GO:0009206	purine ribonucleoside triphosphate biosynthetic process	70	0.737932	1.74058	6.00861e-09	3.1813e-06	3.1128e-06	973	tags=73%, list=19%, signal=60%	Nme2/Atp5g2/Atp5e/Atp5g1/Ndufa13/Eno1/Atp5j/Atp5l/Atp5b/Atp5c1/Atp5h/Atp5j2/Atp5d/Ndufa3/Ndufa7/Ndufb11/Ndufa6/Nme1/Ndufb5/Aldoa/Ndufb9/Ndufa11/Ndufa2/Ndufa1/Ndufs4/Ndufb7/Atp5o/Pkm/Ndufb4/Sdhb/Atp5g3/Ndufa5/Ndufc2/Ndufa12/Ndufb10/Ndufv3/Atp5k/Ndufv2/Ndufs5/Ndufa8/Ndufb8/Dguok/Ndufab1/Ndufb2/Ndufs7/Ndufb3/Impdh2/Ndufs3/Atp5a1/Ndufc1/Ndufs2	GO Biological Process
CD4+ T	GO:0009060	aerobic respiration	117	0.669537	1.61273	1.6225e-08	5.80313e-06	5.67817e-06	1047	tags=58%, list=20%, signal=47%	Atp5e/Cox5b/Cox7c/Ndufa13/Cox4i1/Atp5j/Cox7a2/Atp5b/Chchd2/Atp5c1/Atp5h/Cox7a2l/Park7/Atp5j2/Atp5d/Uqcr10/Ndufa3/Ndufa7/Ndufb11/Uqcrb/Ndufa6/Ndufb5/Rhoa/Nop53/Ndufb9/Ndufa11/Ndufa2/Ndufa1/Ndufs4/Uqcrh/Cox5a/Ndufb7/Atp5o/Mdh2/Ndufb4/Sdhb/Ndufa5/Ndufc2/Ndufa12/Ndufb10/Uqcrq/Ndufv3/Atp5k/Ndufv2/Ndufs5/Ndufa8/Ndufb8/Uqcr11/Dguok/Ndufab1/Uqcc2/Uqcrfs1/Ndufb2/Dnajc15/Ndufs7/Suclg1/Ndufb3/Cycs/Ndufs3/Bl…	GO Biological Process
CD4+ T	GO:0042254	ribosome biogenesis	183	0.618306	1.506	1.85613e-08	5.85773e-06	5.73159e-06	431	tags=23%, list=8%, signal=22%	Rpl10/Rplp0/Rps7/Rps2/Rpl24/Rpl11/Rpl35/Rpl10a/Rps5/Rpl14/Rpl6/Rpl26/Rps24/Rps25/Rps16/Rpl7/Rpl27/Rps19/Rps27/Rpsa/Rps21/Rpl7a/Rpl38/Rps8/Rps14/Rps28/Rpl5/Rpl35a/Rps6/Npm1/Nop10/Rps17/Rpl23a/Ncl/Nsa2/Nop53/Rps15/Trmt112/Ran/Snu13/Fbl/Rbis	GO Biological Process
CD4+ T	GO:0046034	ATP metabolic process	104	0.673871	1.61421	4.20017e-08	1.00408e-05	9.82456e-06	973	tags=53%, list=19%, signal=44%	Gapdh/Atp5g2/Atp5e/Atp5g1/Ndufa13/Eno1/Atp5j/Atp5l/Tspo/Atp5b/Atp5c1/Atp5h/Atp5j2/Atp5d/Ndufa3/Ndufa7/Ndufb11/Ndufa6/Ndufb5/Aldoa/Ndufb9/Ndufa11/Ndufa2/Ndufa1/Ndufs4/Ndufb7/Atp5o/Pkm/Fis1/Ndufb4/Sdhb/Atp5g3/Ndufa5/Ndufc2/Ndufa12/Ndufb10/Ndufv3/Atp5k/Atpif1/Eif6/Ndufv2/Ndufs5/Ndufa8/Ndufb8/Dguok/Ndufab1/Ndufb2/Ndufs7/Ola1/Gpi1/Ndufb3/Ndufs3/Atp5a1/Ndufc1/Ndufs2	GO Biological Process
CD4+ T	GO:0015078	proton transmembrane transporter activity	48	0.771112	1.78933	5.24368e-08	1.2008e-05	1.12601e-05	784	tags=65%, list=15%, signal=55%	Cox8a/Atp5g2/Cox6c/Atp5e/Atp5g1/Cox7c/Cox4i1/Atp5j/Cox7a2/Atp5l/Atp5b/Cox7b/Atp5c1/Atp5h/Cox7a2l/Atp5j2/Atp5d/Atp6v1f/Slc25a4/Slc25a5/Uqcrh/Cox5a/Atp5o/Atp5g3/Uqcrq/Atp5k/Atp6v0e/Uqcr11/Uqcrfs1/Atp6v0c/Atp6v1g1	GO Molecular Function
CD4+ T	mmu05143	African trypanosomiasis - Mus musculus (house mouse)	11	0.93294	1.9108	6.88485e-07	1.4409e-05	1.33038e-05	56	tags=36%, list=1%, signal=36%	Hbb-bs/Hba-a2/Hba-a1/Hbb-bt	Kegg Pathway
CD4+ T	GO:0046390	ribose phosphate biosynthetic process	104	0.667731	1.5995	9.70022e-08	1.67876e-05	1.64261e-05	973	tags=55%, list=19%, signal=45%	Nme2/Atp5g2/Atp5e/Atp5g1/Ndufa13/Eno1/Atp5j/Atp5l/Atp5b/Atp5c1/Atp5h/Atp5j2/Atp5d/Ndufa3/Ndufa7/Ndufb11/Ndufa6/Nme1/Ndufb5/Aldoa/Ndufb9/Ndufa11/Ndufa2/Ndufa1/Ndufs4/Ndufb7/Atp5o/Pkm/Ndufb4/Sdhb/Atp5g3/Ndufa5/Ndufc2/Ndufa12/Ndufb10/Ndufv3/Atp5k/Pdk1/Ndufv2/Ndufs5/Ndufa8/Ndufb8/Dguok/Ndufab1/Ndufb2/Hprt/Ndufs7/Mpc2/Ndufb3/Impdh2/Mpc1/Ndufs3/Adk/Atp5a1/Aprt/Ndufc1/Ndufs2	GO Biological Process
CD4+ T	GO:0140694	non-membrane-bounded organelle assembly	161	0.611568	1.48542	9.32648e-07	0.000131675	0.00012884	863	tags=28%, list=17%, signal=24%	Rpl10/Rplp0/Rps3/Rps2/Rpl24/Rpl11/Rps5/Rpl6/Rps25/Rps19/Rps23/Rps27/Rpsa/Rpl38/Rps14/Rps28/Rpl5/Npm1/Tpr/Rpl23a/Lsm4/Prrc2c/Chmp4b/Arpc2/Rhoa/Cirbp/Nop53/Rps15/Akap13/Msn/Chmp2a/Tubb5/Eif6/Smc1a/Ripor2/Ezr/Asap1/Mrpl20/Aup1/Bin2/Rps27l/Cenpx/C1qbp/Eif2s1/Senp6	GO Biological Process
CD4+ T	GO:0022618	ribonucleoprotein complex assembly	119	0.639637	1.54168	1.42891e-06	0.000186978	0.000182952	573	tags=28%, list=11%, signal=25%	Rpl10/Rplp0/Rps2/Rpl24/Rpl11/Rps5/Rpl6/Rps25/Rps19/Rps27/Rpsa/Rpl38/Rps14/Rps28/Rpl13a/Rpl5/Snrpg/Snrpd2/Rpl23a/Lsm4/Srpk1/Snrpe/Snrpf/Nop53/Rps15/Snu13/Sf3b1/Eif2s2/Snrpd1/Eif6/Snrpd3/Eif5/Snrpb	GO Biological Process
CD4+ T	GO:1901796	regulation of signal transduction by p53 class mediator	44	0.752415	1.72495	1.80572e-06	0.000230659	0.000225692	376	tags=30%, list=7%, signal=28%	Ubb/Rps7/Rpl11/Rpl26/Rpl37/Rps20/Rpl23/Rpl5/Npm1/Mif/Nop53/Rps15/Ddx5	GO Biological Process
CD4+ T	GO:0035821	modulation of process of another organism	8	-0.898254	-2.64095	1.95157e-06	0.000237959	0.000232835	126	tags=62%, list=2%, signal=61%	Fcer2a/Syk/Ltf/Camp/S100a9	GO Biological Process
CD4+ T	GO:0071826	ribonucleoprotein complex subunit organization	123	0.632417	1.52493	3.11268e-06	0.000371101	0.00036311	573	tags=27%, list=11%, signal=24%	Rpl10/Rplp0/Rps2/Rpl24/Rpl11/Rps5/Rpl6/Rps25/Rps19/Rps27/Rpsa/Rpl38/Rps14/Rps28/Rpl13a/Rpl5/Snrpg/Snrpd2/Rpl23a/Lsm4/Srpk1/Snrpe/Snrpf/Nop53/Rps15/Snu13/Sf3b1/Eif2s2/Snrpd1/Eif6/Snrpd3/Eif5/Snrpb	GO Biological Process
CD4+ T	mmu05144	Malaria - Mus musculus (house mouse)	12	0.881818	1.83015	3.61803e-05	0.000706722	0.000652515	56	tags=33%, list=1%, signal=33%	Hbb-bs/Hba-a2/Hba-a1/Hbb-bt	Kegg Pathway
CD4+ T	mmu04260	Cardiac muscle contraction - Mus musculus (house mouse)	28	0.750123	1.67992	6.63234e-05	0.00121455	0.00112139	462	tags=57%, list=9%, signal=52%	Cox8a/Cox6c/Cox5b/Cox7c/Cox6b1/Cox4i1/Cox7a2/Cox7b/Cox7a2l/Uqcr10/Tpm3/Uqcrb/Atp1b3/Uqcrh/Cox5a/Uqcrq	Kegg Pathway
CD4+ T	GO:1901137	carbohydrate derivative biosynthetic process	210	0.557669	1.36072	1.17404e-05	0.00128545	0.00125777	943	tags=33%, list=18%, signal=28%	Nme2/Atp5g2/Itm2b/Atp5e/Atp5g1/Ndufa13/Eno1/Dad1/Atp5j/Bcl2/Atp5l/Atp5b/Atp5c1/Atp5h/Atp5j2/Atp5d/Krtcap2/Ndufa3/Ndufa7/Ost4/Ndufb11/Ndufa6/Nme1/Ndufb5/Aldoa/Ndufb9/Ccr7/Ndufa11/Ndufa2/Ndufa1/Ndufs4/Ndufb7/Atp5o/Ccnd3/Ramp1/Pkm/Ndufb4/Sdhb/Atp5g3/Tmem59/Tmem258/Ndufa5/Ndufc2/Ndufa12/Ndufb10/Ndufv3/Atp5k/Pdk1/Ostc/Ndufv2/Ndufs5/Dpm3/Ndufa8/Ndufb8/Itm2a/Dguok/Ndufab1/Dpm1/Ndufb2/Hprt/Ndufs7/Mpc2/Nd…	GO Biological Process
CD4+ T	GO:0006364	rRNA processing	132	0.606591	1.46578	1.24351e-05	0.00133428	0.00130555	406	tags=23%, list=8%, signal=22%	Rps7/Rpl11/Rpl35/Rpl10a/Rpl14/Rpl26/Rps24/Rps25/Rps16/Rpl7/Rpl27/Rps19/Rps27/Rps21/Rpl7a/Rps8/Rps14/Rps28/Rpl5/Rpl35a/Rps6/Npm1/Nop10/Rps17/Ncl/Nsa2/Nop53/Rps15/Trmt112/Snu13/Fbl	GO Biological Process
CD4+ T	mmu05150	Staphylococcus aureus infection - Mus musculus (house mouse)	12	-0.68037	-2.32002	9.05461e-05	0.00147389	0.00136084	87	tags=75%, list=2%, signal=74%	Icam1/H2-Eb1/H2-Aa/Itgal/H2-DMb1/H2-DMb2/H2-Ob/H2-Ab1/Camp	Kegg Pathway
CD4+ T	mmu03050	Proteasome - Mus musculus (house mouse)	43	0.706503	1.61962	8.97708e-05	0.00147389	0.00136084	1032	tags=67%, list=20%, signal=54%	Psmb8/Psme2/Psma2/Psme1/Psmb1/Psmb10/Psma7/Psmb9/Sem1/Psmb3/Psmb2/Psmb6/Psma3/Psma4/Psmb5/Psmd8/Pomp/Psma5/Psma1/Psmd4/Psmb4/Psmc3/Psmd6/Psmc2/Psmc4/Psma6/Psmc5/Psmc6/Psmd7	Kegg Pathway
CD4+ T	GO:0016072	rRNA metabolic process	147	0.585095	1.41766	1.88495e-05	0.00194476	0.00190288	1161	tags=40%, list=23%, signal=32%	Rps7/Rpl11/Rpl35/Rpl10a/Rpl14/Rpl26/Rps24/Rps25/Rps16/Rpl7/Rpl27/Rps19/Rps27/Rps21/Rpl7a/Rps8/Rps14/Rps28/Rpl5/Rpl35a/Rps6/Npm1/Nop10/Rps17/Ncl/Nsa2/Nop53/Rps15/Trmt112/Snu13/Fbl/Zcchc7/Eif6/Emg1/Wdr43/Rps27rt/Rrp1/Utp3/Pin4/Imp3/Ddx21/Top1/Pa2g4/Gtf2h5/Lsm6/Npm3/Trir/Isg20/Ddx27/Riok3/Xrn1/Sirt7/Ddx18/Exosc8/Exosc5/Ddx52/Pop5/Mphosph10/Gtpbp4	GO Biological Process
CD4+ T	GO:0003729	mRNA binding	192	0.56948	1.38796	1.91288e-05	0.00350439	0.00328612	1219	tags=35%, list=24%, signal=28%	Rps7/Rps3/Rps2/Rpl24/Rpl35/Rps5/Rpl6/Rps13/Rpl26/Rpl30/Rpl7/Eef1a1/Rps3a1/Rps14/Rps26/Rpl13a/Rpl41/Rpl5/Ybx1/Tpr/Hnrnpa1/Park7/Hnrnpd/Ncl/Hnrnpa3/Srrm2/Cirbp/Cnbp/Serbp1/Ddx5/Sf3b1/Eif2s2/Pkm/Sf3b6/Calr/Tra2b/Dhx36/Mbd2/Tsn/Rbm4b/Srsf3/Hnrnpa0/Ssb/Cct5/Srsf5/Paip2/Zfp36l2/C1qbp/Fubp1/Mrpl12/Nudt21/Denr/Rbm8a/Gnl3/Rnps1/Luc7l3/Cdc40/Exosc8/Pabpc1/Hnrnpk/Hnrnpl/Thoc2/Strap/Eif4a3/Khdrbs1/Fus/Eif3d/…	GO Molecular Function
CD4+ T	mmu05170	Human immunodeficiency virus 1 infection - Mus musculus (house mouse)	109	0.581906	1.38811	0.000462527	0.00713266	0.00658557	872	tags=31%, list=17%, signal=26%	Cd3d/Elob/Cd3g/H2-D1/Nfkbia/Calm1/Bcl2/Cfl1/Rac2/H2-T23/Gng5/Rbx1/Cd3e/Gnai2/H2-Q4/Bst2/B2m/H2-Q7/Jun/Pdia3/H2-K1/Calm2/H2-T22/Cd247/Bax/Calr/Samhd1/Rac1/Cd4/Eloc/Map2k2/Cycs/Pak2/Kras	Kegg Pathway
CD4+ T	mmu05310	Asthma - Mus musculus (house mouse)	7	-0.767384	-2.163	0.000506693	0.00722007	0.00666628	87	tags=86%, list=2%, signal=84%	H2-Eb1/H2-Aa/H2-DMb1/H2-DMb2/H2-Ob/H2-Ab1	Kegg Pathway
CD4+ T	mmu04723	Retrograde endocannabinoid signaling - Mus musculus (house mouse)	57	0.639417	1.48752	0.000517479	0.00722007	0.00666628	1006	tags=58%, list=20%, signal=47%	Ndufa13/Ndufa4/Gng5/Ndufa3/Gnai2/Ndufa7/Ndufb11/Ndufa6/Ndufb5/Ndufb9/Ndufa11/Ndufa2/Ndufa1/Ndufs4/Ndufb7/Ndufb4/Ndufa5/Ndufc2/Ndufa12/Ndufb10/Ndufv3/Ndufv2/Ndufs5/Ndufa8/Ndufb8/Ndufab1/Ndufb2/Ndufs7/Ndufb3/Ndufs3/Ndufc1/Ndufs2/Itpr2	Kegg Pathway
CD4+ T	GO:0015399	primary active transmembrane transporter activity	65	0.657703	1.54522	4.74265e-05	0.00724044	0.00678947	784	tags=46%, list=15%, signal=40%	Cox8a/Sec61g/Cox6c/Atp5e/Cox7c/Cox4i1/Cox7a2/Atp5l/Atp5b/Cox7b/Cox7a2l/Ndufa7/Tomm20/Atp6v1f/Ndufa2/Atp1b3/Ndufs4/Uqcrh/Cox5a/Ndufb7/Ndufc2/Uqcrq/Atp6v0e/Ndufv2/Ndufb8/Uqcr11/Uqcrfs1/Ndufs7/Atp6v0c/Atp6v1g1	GO Molecular Function
CD4+ T	GO:0055105	ubiquitin-protein transferase inhibitor activity	7	0.938156	1.76848	0.000113175	0.0106238	0.00996206	325	tags=100%, list=6%, signal=94%	Rps7/Rpl11/Rpl37/Rps20/Rpl23/Rpl5/Rps15	GO Molecular Function
CD4+ T	GO:1990948	ubiquitin ligase inhibitor activity	7	0.938156	1.76848	0.000113175	0.0106238	0.00996206	325	tags=100%, list=6%, signal=94%	Rps7/Rpl11/Rpl37/Rps20/Rpl23/Rpl5/Rps15	GO Molecular Function
CD4+ T	GO:0031386	protein tag	11	0.876923	1.76239	0.000122319	0.0106238	0.00996206	498	tags=82%, list=10%, signal=74%	Uba52/Ubb/Rps27a/Ubl5/Sumo2/Nedd8/Isg15/Sumo1/Ubc	GO Molecular Function
CD4+ T	GO:0003785	actin monomer binding	8	0.918437	1.75791	0.000105383	0.0106238	0.00996206	268	tags=50%, list=5%, signal=47%	Tmsb10/Tmsb4x/Pfn1/Coro1a	GO Molecular Function
CD4+ T	GO:0015318	inorganic molecular entity transmembrane transporter activity	118	0.588854	1.42061	0.000150774	0.0106238	0.00996206	534	tags=26%, list=10%, signal=24%	Cox8a/Atp5g2/Cox6c/Atp5e/Atp5g1/Cox7c/Cox4i1/Clic1/Atp5j/Cox7a2/Atp5l/Atp5b/Cox7b/Atp5c1/Atp5h/Cox7a2l/Atp5j2/Atp5d/Atp6v1f/Slc25a4/Slc25a5/Atp1b3/Uqcrh/Cox5a/Atp5o/Slc25a3/Vdac2/Atp5g3/Uqcrq/Atp5k/Atp6v0e	GO Molecular Function
CD4+ T	GO:1902253	regulation of intrinsic apoptotic signaling pathway by p53 class mediator	18	0.819668	1.77873	0.000116358	0.0113502	0.0111058	148	tags=28%, list=3%, signal=27%	Ubb/Rps7/Rpl11/Rpl26/Mif	GO Biological Process
CD4+ T	GO:0070003	threonine-type peptidase activity	12	0.853824	1.74648	0.000280009	0.0122243	0.011463	603	tags=83%, list=12%, signal=74%	Psmb8/Psmb1/Psmb10/Psmb9/Psmb3/Psmb2/Psmb6/Psma4/Psmb5/Psmb4	GO Molecular Function
CD4+ T	GO:0042989	sequestering of actin monomers	5	0.959572	1.72361	0.000156187	0.0147008	0.0143842	95	tags=60%, list=2%, signal=59%	Tmsb10/Tmsb4x/Pfn1	GO Biological Process
CD4+ T	GO:0004129	cytochrome-c oxidase activity	10	0.86242	1.71663	0.000425181	0.0172458	0.0161717	380	tags=80%, list=7%, signal=74%	Cox8a/Cox6c/Cox7c/Cox4i1/Cox7a2/Cox7b/Cox7a2l/Cox5a	GO Molecular Function
CD4+ T	GO:0003746	translation elongation factor activity	11	0.853834	1.71599	0.000494119	0.0172458	0.0161717	173	tags=45%, list=3%, signal=44%	Eef1b2/Eef1a1/Eif5a/Eef2/Eef1d	GO Molecular Function
CD4+ T	GO:0016675	oxidoreductase activity, acting on a heme group of donors	11	0.852828	1.71396	0.000523472	0.0172458	0.0161717	380	tags=73%, list=7%, signal=68%	Cox8a/Cox6c/Cox7c/Cox4i1/Cox7a2/Cox7b/Cox7a2l/Cox5a	GO Molecular Function
CD4+ T	GO:0009055	electron transfer activity	40	0.695014	1.59783	0.000517997	0.0172458	0.0161717	1100	tags=68%, list=21%, signal=53%	Cyba/Cox8a/Cox6c/Cox7c/Cox4i1/Cox7a2/Cox7b/Cox7a2l/Ndufa7/Ndufa2/Ndufs4/Uqcrh/Cox5a/Ndufb7/Sdhb/Ndufc2/Uqcrq/Ndufv2/Ndufb8/Uqcr11/Uqcrfs1/Ndufs7/Ndufs3/Ndufs2/Etfb/Cox6a1/Ndufs8	GO Molecular Function
CD4+ T	mmu04392	Hippo signaling pathway - multiple species - Mus musculus (house mouse)	8	-0.698931	-2.08353	0.00137794	0.0183517	0.016944	1530	tags=75%, list=30%, signal=52%	Mob1a/Mob1b/Lats2/Lats1/Limd1/Rassf2	Kegg Pathway
CD4+ T	GO:0045182	translation regulator activity	82	0.607681	1.44404	0.000673178	0.0205544	0.0192741	839	tags=35%, list=16%, signal=30%	Rpl10/Eef1b2/Eef1a1/Rps14/Rpl22/Eif3h/Eif3f/Rps9/Eif1/Eif5a/Eef2/Eif3i/Eef1d/Eif3k/Eif3m/Cirbp/Cnbp/Eif3e/Eif3c/Eif4a1/Eif2s2/Eif6/Eif5/Mrpl58/Eif3g/Eef1g/Rps27l/Paip2/Eif2s1	GO Molecular Function
CD4+ T	GO:0035325	Toll-like receptor binding	5	-0.875197	-2.06658	0.000771647	0.0228009	0.0213808	24	tags=60%, list=0%, signal=60%	Syk/Unc93b1/S100a8	GO Molecular Function
CD4+ T	GO:1905144	response to acetylcholine	9	0.90458	1.80022	0.000251208	0.0232367	0.0227363	338	tags=67%, list=7%, signal=62%	Ly6a/Tspo/Rgs10/Ly6c1/Gnai2/Ly6e	GO Biological Process
CD4+ T	mmu01100	Metabolic pathways - Mus musculus (house mouse)	427	0.482735	1.19052	0.00201642	0.0256874	0.0237171	1034	tags=28%, list=20%, signal=25%	Nme2/Cox8a/Gapdh/Atp5g2/Cox6c/Atp5e/Cox5b/Atp5g1/Cox7c/Mif/Ndufa13/Eno1/Cox6b1/Cox4i1/Dad1/Atp5j/Cox7a2/Atp5l/Ndufa4/Atp5b/Cox7b/Atp5c1/Atp5h/Cox7a2l/Atp5j2/Atp5d/Uqcr10/Ndufa3/Ldha/Nt5c/Ndufa7/Ndufb11/Uqcrb/Ndufa6/Nme1/Ndufb5/Atp6v1f/Aldoa/Ndufb9/Gpx4/Ndufa11/Ndufa2/Ndufa1/Ndufs4/Uqcrh/Cox5a/Ndufb7/Atp5o/Pkm/Mdh2/Ndufb4/Sdhb/Atp5g3/Prdx6/Ndufa5/Ndufc2/Ndufa12/Ndufb10/Uqcrq/Plaat3/Ndufv3/Atp5k/Gs…	Kegg Pathway
CD4+ T	GO:0048821	erythrocyte development	17	0.806326	1.73547	0.000323824	0.0294461	0.028812	132	tags=24%, list=3%, signal=23%	Hba-a2/Hba-a1/Rps6/Klf2	GO Biological Process
CD4+ T	mmu04137	Mitophagy - animal - Mus musculus (house mouse)	37	0.663722	1.50973	0.00257395	0.0314236	0.0290134	535	tags=30%, list=11%, signal=27%	Uba52/Ubb/Rps27a/Tomm7/Map1lc3b/Jun/Gabarapl2/Fis1/Gabarap/Ubc/Tax1bp1	Kegg Pathway
CD4+ T	GO:0095500	acetylcholine receptor signaling pathway	7	0.923208	1.76649	0.000357009	0.0319226	0.0312352	338	tags=71%, list=7%, signal=67%	Ly6a/Rgs10/Ly6c1/Gnai2/Ly6e	GO Biological Process
CD4+ T	GO:0042610	CD8 receptor binding	10	0.841637	1.67526	0.00124102	0.0355242	0.0333116	481	tags=70%, list=9%, signal=64%	H2-D1/H2-T23/H2-Q4/H2-Q7/H2-K1/Lck/H2-T22	GO Molecular Function
CD4+ T	GO:0035612	AP-2 adaptor complex binding	7	-0.717231	-1.90104	0.00147806	0.0409149	0.0383665	1462	tags=100%, list=28%, signal=72%	Bmp2k/Fcho1/Lmbrd1/Aak1/Ldlrap1/Tbc1d5	GO Molecular Function
CD4+ T	GO:1903050	regulation of proteolysis involved in protein catabolic process	110	0.576513	1.38568	0.000517479	0.0455127	0.0445327	656	tags=20%, list=13%, signal=18%	Ubb/Rps7/Rpl11/Rpl23/Rack1/Rpl5/Eif3h/Psme2/Psme1/Sumo2/Rbx1/Park7/Nop53/Trib2/Smad7/Sumo1/Gabarapl2/Gabarap/Atpif1/Ubxn1/Ddrgk1/Bcap31	GO Biological Process
CD4+ T	GO:0016684	oxidoreductase activity, acting on peroxide as acceptor	18	0.771642	1.67069	0.0018258	0.0464565	0.043563	1126	tags=78%, list=22%, signal=61%	Hba-a1/Hbb-bt/Park7/Selenof/Gpx4/Prdx2/Prdx6/Txndc17/Prdx1/Prdx5/Gstp1/Gpx1/Prdx3/Mgst2	GO Molecular Function

## Sheet: CD8+ memory T_pathway
ClusterID	ID	Description	setSize	enrichmentScore	NES	pvalue	p.adjust	qvalue	rank	leading_edge	core_enrichment	PathwayDB
CD8+ memory T	mmu05171	Coronavirus disease - COVID-19 - Mus musculus (house mouse)	133	0.864928	2.33774	1e-10	3.14e-09	2.82105e-09	320	tags=58%, list=5%, signal=56%	Uba52/Rpl15/Rps18/Rpl32/Rplp0/Rpl10/Rps15a/Rps7/Rps3/Rps2/Rpl11/Rpl28/Rps11/Rpl34/Rpl24/Rpl9/Rps5/Rpl35/Rpl21/Rpl14/Rpl36/Rpl10a/Rps4x/Rpl13/Rpl8/Rpl26/Rpl39/Rpl3/Rpl22l1/Rpl19/Rps10/Rps13/Rpl12/Rpl6/Rps27a/Rpl17/Rpl29/Fau/Rpl18a/Rpl27a/Rps20/Rpl18/Rpl37/Rps16/Rps23/Rps24/Rpsa/Rpl23/Rpl7a/Rps27/Rpl27/Rpl30/Rps21/Rpl36a/Rpl7/Rps29/Rps3a1/Rps25/Rps19/Rpl38/Rpl36al/Rps14/Rps28/Rpl5/Rps6/Rpl13a/Rplp1…	Kegg Pathway
CD8+ memory T	mmu03010	Ribosome - Mus musculus (house mouse)	126	0.864031	2.32699	1e-10	3.14e-09	2.82105e-09	503	tags=68%, list=8%, signal=64%	Uba52/Rpl15/Rps18/Rpl32/Rplp0/Rpl10/Rps15a/Rps7/Rps3/Rps2/Rpl11/Rpl28/Rps11/Rpl34/Rpl24/Rpl9/Rps5/Rpl35/Rpl21/Rpl14/Rpl36/Rpl10a/Rps4x/Rpl13/Rpl8/Rpl26/Rpl39/Rpl3/Rpl22l1/Rpl19/Rps10/Rps13/Rpl12/Rpl6/Rps27a/Rpl17/Rpl29/Fau/Rpl18a/Rpl27a/Rps20/Rpl18/Rpl37/Rps16/Rps23/Rps24/Rpsa/Rpl23/Rpl7a/Rps27/Rpl27/Rpl30/Rps21/Rpl36a/Rpl7/Rps29/Rps3a1/Rps25/Rps19/Rpl38/Rpl36al/Rps14/Rps28/Rpl5/Rps6/Rpl13a/Rplp1…	Kegg Pathway
CD8+ memory T	mmu00190	Oxidative phosphorylation - Mus musculus (house mouse)	95	0.795678	2.10679	1e-10	3.14e-09	2.82105e-09	937	tags=74%, list=14%, signal=64%	Cox8a/Atp5g1/Cox5b/Cox6c/Atp5g2/Atp5j2/Cox7b/Ndufa13/Ndufa7/Atp5e/Cox7a2/Atp5b/Atp5h/Atp5d/Atp5j/Uqcrb/Atp5c1/Ndufa4/Cox5a/Cox6b1/Ndufv3/Cox7c/Uqcr10/Ndufa1/Ndufb11/Ndufa3/Ndufb4/Atp5o/Atp6v0e/Ndufa12/Atp6v1f/Ndufb5/Ndufa11/Cox4i1/Atp5l/Cox7a2l/Ndufs4/Ndufb9/Sdhb/Atp5k/Ndufb8/Uqcrq/Ndufc2/Ndufa5/Ndufa8/Ndufv2/Ndufa2/Ndufs5/Ndufb10/Ndufb7/Ndufb2/Uqcrfs1/Ndufs7/Ndufa6/Ndufc1/Ndufs8/Ndufb6/Ndufab1/C…	Kegg Pathway
CD8+ memory T	mmu05012	Parkinson disease - Mus musculus (house mouse)	178	0.733881	1.98905	1e-10	3.14e-09	2.82105e-09	953	tags=56%, list=15%, signal=49%	Uba52/Ubb/Cox8a/Rps27a/Atp5g1/Cox5b/Cox6c/Atp5g2/Park7/Cox7b/Ndufa13/Ndufa7/Psma2/Slc25a4/Atp5e/Cox7a2/Atp5b/Atp5h/Atp5d/Psmb1/Atp5j/Uqcrb/Atp5c1/Txn1/Ndufa4/Calm1/Cox5a/Cox6b1/Ndufv3/Psmb2/Cox7c/Uqcr10/Ndufa1/Psmb3/Ndufb11/Ndufa3/Ndufb4/Atp5o/Psma7/Slc25a5/Ndufa12/Ndufb5/Bax/Ndufa11/Cox4i1/Cox7a2l/Psmb5/Psmb6/Ndufs4/Ndufb9/Psma5/Sdhb/Vdac2/Ndufb8/Uqcrq/Psmd8/Ndufc2/Ndufa5/Ndufa8/Psma4/Ndufv2/Psm…	Kegg Pathway
CD8+ memory T	mmu04714	Thermogenesis - Mus musculus (house mouse)	138	0.717048	1.94137	1e-10	3.14e-09	2.82105e-09	937	tags=52%, list=14%, signal=46%	Cox8a/Atp5g1/Cox5b/Cox6c/Atp5g2/Atp5j2/Cox7b/Ndufa13/Ndufa7/Atp5e/Rps6/Cox7a2/Atp5b/Atp5h/Atp5d/Atp5j/Uqcrb/Atp5c1/Ndufa4/Cox5a/Cox6b1/Ndufv3/Cox7c/Uqcr10/Ndufa1/Ndufb11/Ndufa3/Ndufb4/Atp5o/Ndufa12/Ndufb5/Ndufa11/Cox4i1/Atp5l/Cox7a2l/Ndufs4/Ndufb9/Sdhb/Atp5k/Ndufb8/Uqcrq/Ndufc2/Ndufa5/Ndufa8/Ndufv2/Actb/Ndufa2/Ndufs5/Ndufb10/Kras/Ndufb7/Ndufb2/Uqcrfs1/Ndufs7/Ndufa6/Ndufc1/Ndufs8/Ndufb6/Ndufab1/Co…	Kegg Pathway
CD8+ memory T	mmu05020	Prion disease - Mus musculus (house mouse)	169	0.693381	1.88063	1e-10	3.14e-09	2.82105e-09	953	tags=54%, list=15%, signal=48%	Ccl5/Cox8a/Cyba/Atp5g1/Cox5b/Cox6c/Atp5g2/Cox7b/Ndufa13/Ndufa7/Psma2/Slc25a4/Atp5e/Cox7a2/Atp5b/Atp5h/Atp5d/Rac2/Psmb1/Atp5j/Uqcrb/Atp5c1/Ndufa4/Cox5a/Cox6b1/Ndufv3/Psmb2/Cox7c/Uqcr10/Ndufa1/Psmb3/Ndufb11/Ndufa3/Ndufb4/Atp5o/Psma7/Slc25a5/Ndufa12/Ndufb5/Bax/Ndufa11/Cox4i1/Cox7a2l/Psmb5/Psmb6/Ndufs4/Ndufb9/Psma5/Sdhb/Vdac2/Ndufb8/Uqcrq/Psmd8/Ndufc2/Ndufa5/Ndufa8/Psma4/Ndufv2/Psma3/Ndufa2/Ndufs5/Nd…	Kegg Pathway
CD8+ memory T	mmu05016	Huntington disease - Mus musculus (house mouse)	195	0.683922	1.86344	1e-10	3.14e-09	2.82105e-09	1363	tags=58%, list=21%, signal=48%	Cox8a/Atp5g1/Cox5b/Cox6c/Atp5g2/Cox7b/Ndufa13/Ndufa7/Psma2/Slc25a4/Atp5e/Cox7a2/Atp5b/Atp5h/Atp5d/Psmb1/Atp5j/Uqcrb/Atp5c1/Ndufa4/Cox5a/Cox6b1/Ndufv3/Psmb2/Clta/Cox7c/Uqcr10/Ndufa1/Psmb3/Ndufb11/Ndufa3/Ndufb4/Atp5o/Psma7/Slc25a5/Ndufa12/Ndufb5/Bax/Ndufa11/Cox4i1/Cox7a2l/Psmb5/Psmb6/Ndufs4/Ndufb9/Psma5/Sdhb/Vdac2/Ndufb8/Uqcrq/Psmd8/Ndufc2/Ndufa5/Ndufa8/Psma4/Ndufv2/Psma3/Ndufa2/Ndufs5/Polr2e/Ndufb…	Kegg Pathway
CD8+ memory T	mmu05010	Alzheimer disease - Mus musculus (house mouse)	222	0.660085	1.80116	1e-10	3.14e-09	2.82105e-09	953	tags=43%, list=15%, signal=38%	Cox8a/Gapdh/Atp5g1/Cox5b/Cox6c/Atp5g2/Cox7b/Ndufa13/Ndufa7/Psma2/Slc25a4/Atp5e/Cox7a2/Atp5b/Atp5h/Atp5d/Psmb1/Atp5j/Uqcrb/Atp5c1/Ndufa4/Calm1/Cox5a/Cox6b1/Ndufv3/Psmb2/Cox7c/Uqcr10/Ndufa1/Psmb3/Ndufb11/Ndufa3/Ndufb4/Atp5o/Psma7/Slc25a5/Ndufa12/Ndufb5/Ndufa11/Cox4i1/Cox7a2l/Psenen/Psmb5/Psmb6/Ndufs4/Ndufb9/Psma5/Sdhb/Vdac2/Ndufb8/Uqcrq/Psmd8/Ndufc2/Ndufa5/Ndufa8/Psma4/Ndufv2/Hsd17b10/Psma3/Ndufa2/…	Kegg Pathway
CD8+ memory T	mmu05014	Amyotrophic lateral sclerosis - Mus musculus (house mouse)	225	0.643322	1.75633	1e-10	3.14e-09	2.82105e-09	953	tags=42%, list=15%, signal=37%	Cox8a/Atp5g1/Cox5b/Pfn1/Cox6c/Atp5g2/Cox7b/Ndufa13/Bcl2/Ndufa7/Psma2/Atp5e/Cox7a2/Atp5b/Atp5h/Atp5d/Psmb1/Atp5j/Hnrnpa1/Uqcrb/Atp5c1/Ndufa4/Cox5a/Cox6b1/Ndufv3/Psmb2/Cox7c/Uqcr10/Ndufa1/Psmb3/Ndufb11/Ndufa3/Ndufb4/Atp5o/Psma7/Ndufa12/Ndufb5/Bax/Ndufa11/Cox4i1/Cox7a2l/Psmb5/Psmb6/Ndufs4/Ndufb9/Map1lc3b/Psma5/Hnrnpa3/Sdhb/Ndufb8/Uqcrq/Psmd8/Ndufc2/Ndufa5/Ndufa8/Psma4/Ndufv2/Actb/Psma3/Ndufa2/Ndufs5…	Kegg Pathway
CD8+ memory T	mmu05022	Pathways of neurodegeneration - multiple diseases - Mus musculus (house mouse)	261	0.636837	1.74542	1e-10	3.14e-09	2.82105e-09	953	tags=40%, list=15%, signal=35%	Uba52/Ubb/Cox8a/Rps27a/Atp5g1/Cox5b/Cox6c/Atp5g2/Park7/Cox7b/Ndufa13/Bcl2/Ndufa7/Psma2/Slc25a4/Atp5e/Cox7a2/Atp5b/Atp5h/Atp5d/Psmb1/Atp5j/Uqcrb/Atp5c1/Ndufa4/Calm1/Cox5a/Cox6b1/Ndufv3/Psmb2/Cox7c/Uqcr10/Ndufa1/Psmb3/Ndufb11/Ndufa3/Ndufb4/Atp5o/Psma7/Slc25a5/Ndufa12/Ndufb5/Bax/Ndufa11/Cox4i1/Cox7a2l/Psmb5/Psmb6/Ndufs4/Ndufb9/Map1lc3b/Psma5/Sdhb/Vdac2/Ndufb8/Uqcrq/Psmd8/Ndufc2/Ndufa5/Ndufa8/Psma4/N…	Kegg Pathway
CD8+ memory T	mmu05415	Diabetic cardiomyopathy - Mus musculus (house mouse)	128	0.692892	1.87187	2.23845e-10	6.38977e-09	5.74072e-09	994	tags=55%, list=15%, signal=48%	Cox8a/Cyba/Gapdh/Atp5g1/Cox5b/Cox6c/Atp5g2/Cox7b/Ndufa13/Ndufa7/Slc25a4/Atp5e/Cox7a2/Atp5b/Atp5h/Atp5d/Rac2/Atp5j/Uqcrb/Atp5c1/Ndufa4/Cox5a/Cox6b1/Ndufv3/Cox7c/Uqcr10/Ndufa1/Ndufb11/Ndufa3/Ndufb4/Atp5o/Slc25a5/Ndufa12/Ndufb5/Ndufa11/Cox4i1/Cox7a2l/Ndufs4/Ndufb9/Sdhb/Vdac2/Ndufb8/Uqcrq/Ndufc2/Ndufa5/Ndufa8/Ndufv2/Ndufa2/Mpc2/Ndufs5/Ndufb10/Ndufb7/Ndufb2/Uqcrfs1/Ndufs7/Mpc1/Ndufa6/Ndufc1/Ndufs8/Ndu…	Kegg Pathway
CD8+ memory T	mmu05208	Chemical carcinogenesis - reactive oxygen species - Mus musculus (house mouse)	139	0.686559	1.85955	4.89715e-10	1.28142e-08	1.15126e-08	949	tags=51%, list=15%, signal=45%	Cox8a/Cyba/Atp5g1/Cox5b/Cox6c/Atp5g2/Cox7b/Ndufa13/Ndufa7/Slc25a4/Atp5e/Cox7a2/Atp5b/Atp5h/Atp5d/Atp5j/Uqcrb/Atp5c1/Ndufa4/Cox5a/Cox6b1/Ndufv3/Cox7c/Uqcr10/Ndufa1/Ndufb11/Ndufa3/Ndufb4/Atp5o/Slc25a5/Ndufa12/Ndufb5/Nfkbia/Ndufa11/Cox4i1/Cox7a2l/Ndufs4/Ndufb9/Sdhb/Vdac2/Ndufb8/Uqcrq/Ndufc2/Ndufa5/Ndufa8/Ndufv2/Ndufa2/Ndufs5/Ndufb10/Kras/Ndufb7/Ndufb2/Uqcrfs1/Ndufs7/Ndufa6/Ndufc1/Ndufs8/Ndufb6/Ndufa…	Kegg Pathway
CD8+ memory T	GO:0003735	structural constituent of ribosome	151	0.842738	2.26019	1e-10	3.39667e-08	3.06316e-08	510	tags=61%, list=8%, signal=58%	Uba52/Rpl15/Rps18/Rpl32/Rplp0/Rpl10/Rps15a/Rps7/Rps3/Rps2/Rpl11/Rpl28/Rps11/Rpl34/Rpl24/Rpl9/Rps5/Rpl35/Rpl21/Rpl14/Rpl36/Rpl10a/Rps4x/Rpl13/Rpl8/Rpl26/Rpl39/Rpl3/Rpl22l1/Rpl19/Rps10/Rps13/Rpl12/Rpl6/Rps27a/Rpl17/Rpl29/Fau/Rpl18a/Rpl27a/Rps20/Rpl18/Rpl37/Rps16/Rps23/Rps24/Rpsa/Rpl23/Rpl7a/Rps27/Rpl27/Rpl30/Rps21/Rpl36a/Rpl7/Rps29/Rps3a1/Rps25/Rps19/Rpl38/Rpl36al/Ndufa7/Rps14/Rps28/Rpl5/Rps6/Rpl13…	GO Molecular Function
CD8+ memory T	GO:0005198	structural molecule activity	225	0.80271	2.17737	1e-10	3.39667e-08	3.06316e-08	516	tags=46%, list=8%, signal=44%	Uba52/Rpl15/Rps18/Rpl32/Rplp0/Rpl10/Rps15a/Rps7/Rps3/Rps2/Rpl11/Rpl28/Rps11/Rpl34/Rpl24/Rpl9/Rps5/Rpl35/Rpl21/Rpl14/Rpl36/Rpl10a/Rps4x/Rpl13/Rpl8/Rpl26/Rpl39/Rpl3/Rpl22l1/Rpl19/Rps10/Rps13/Rpl12/Rpl6/Rps27a/Rpl17/Rpl29/Fau/Rpl18a/Rpl27a/Rps20/Rpl18/Rpl37/Rps16/Rps23/Rps24/Rpsa/Rpl23/Rpl7a/Rps27/Rpl27/Rpl30/Rps21/Rpl36a/Rpl7/Rps29/Rps3a1/Rps25/Rps19/Arpc3/Vim/Rpl38/Rpl36al/Ndufa7/Rps14/Rps28/Rpl5/…	GO Molecular Function
CD8+ memory T	GO:0019843	rRNA binding	60	0.821295	2.08073	1e-10	3.39667e-08	3.06316e-08	772	tags=58%, list=12%, signal=52%	Rps18/Rplp0/Rps3/Rpl11/Rps11/Rpl9/Rps5/Rps4x/Rpl8/Rpl3/Rpl19/Rps13/Rpl12/Rpl6/Rpl17/Rpl37/Rpl23/Rpl7/Rps14/Rpl5/Npm1/Cirbp/Rpl4/Eef2/Rps9/Mrps18c/Rpl37a/Mrpl18/Imp3/Ncl/Mrpl20/Nop53/Emg1/Rpl23a/Ddx21	GO Molecular Function
CD8+ memory T	GO:0030183	B cell differentiation	100	-0.593278	-2.53206	1e-10	3.64938e-08	3.45e-08	566	tags=41%, list=9%, signal=38%	Clcf1/Lyl1/Ikzf1/Dock11/Bcl6/Pik3r1/Ptprj/Il4i1/Dock10/Foxp1/Tcirg1/Inpp5d/Xbp1/Hdac7/Plcg2/Sp3/Nfatc1/Btk/Laptm5/Syvn1/Hhex/Irf2bp2/Ep300/Malt1/Cd24a/Ptpn6/Pou2af1/Spib/H2-Ab1/Zfp36l1/Syk/Irf8/Cd19/Pou2f2/Bcl11a/Cd79b/Cd79a/Cr2/Ms4a1/Igkc/Ighm	GO Biological Process
CD8+ memory T	GO:0002181	cytoplasmic translation	125	0.879373	2.36142	1e-10	3.64938e-08	3.45e-08	325	tags=61%, list=5%, signal=59%	Uba52/Rpl15/Rps18/Rpl32/Rplp0/Rps15a/Rps7/Rps3/Rps2/Rpl11/Rpl28/Rps11/Rpl34/Rpl24/Rpl9/Rps5/Rpl21/Rpl14/Rpl36/Rpl10a/Rps4x/Rpl13/Rpl8/Rpl26/Rpl39/Rpl3/Rpl22l1/Rpl19/Rps10/Rps13/Rpl12/Rpl6/Rps27a/Rpl17/Rpl29/Fau/Rpl18a/Rpl27a/Rps20/Rpl18/Rps16/Rps23/Rps24/Rpsa/Rpl23/Rpl7a/Rpl27/Rpl30/Rps21/Rpl36a/Rpl7/Rps29/Rps3a1/Rps25/Rps19/Rpl38/Rps14/Rps28/Rpl5/Rps6/Rpl13a/Rplp1/Rps8/Eif3i/Rpl22/Rpl35a/Hnrnpd/…	GO Biological Process
CD8+ memory T	GO:0015986	proton motive force-driven ATP synthesis	55	0.821067	2.07564	1e-10	3.64938e-08	3.45e-08	921	tags=82%, list=14%, signal=71%	Atp5g1/Atp5g2/Atp5j2/Ndufa13/Ndufa7/Atp5e/Atp5b/Atp5h/Atp5d/Atp5j/Atp5c1/Ndufv3/Ndufa1/Ndufb11/Ndufa3/Ndufb4/Atp5o/Ndufa12/Ndufb5/Ndufa11/Atp5l/Ndufs4/Ndufb9/Sdhb/Atp5k/Ndufb8/Ndufc2/Ndufa5/Ndufa8/Ndufv2/Ndufa2/Ndufs5/Ndufb10/Ndufb7/Ndufb2/Ndufs7/Ndufa6/Ndufc1/Ndufs8/Ndufb6/Ndufab1/Ndufs3/Ndufa9/Ndufa10/Ndufb3	GO Biological Process
CD8+ memory T	GO:0006119	oxidative phosphorylation	93	0.78049	2.05638	1e-10	3.64938e-08	3.45e-08	956	tags=68%, list=14%, signal=59%	Cox5b/Atp5j2/Park7/Ndufa13/Dnajc15/Ndufa7/Atp5e/Cox7a2/Atp5b/Atp5h/Atp5d/Atp5j/Uqcrb/Atp5c1/Cox5a/Ndufv3/Cox7c/Uqcr10/Ndufa1/Ndufb11/Ndufa3/Ndufb4/Atp5o/Chchd2/Ndufa12/Ndufb5/Ndufa11/Cox4i1/Cox7a2l/Ndufs4/Ndufb9/Sdhb/Atp5k/Ndufb8/Uqcrq/Ndufc2/Ndufa5/Ndufa8/Ndufv2/Ndufa2/Rhoa/Ndufs5/Ndufb10/Ndufb7/Ndufb2/Dguok/Uqcrfs1/Ndufs7/Ndufa6/Ndufc1/Ndufs8/Ndufb6/Ndufab1/Uqcc2/Cycs/Ndufs3/Uqcr11/Ndufa9/Uqcrc…	GO Biological Process
CD8+ memory T	GO:0009206	purine ribonucleoside triphosphate biosynthetic process	74	0.786783	2.0368	1e-10	3.64938e-08	3.45e-08	683	tags=64%, list=10%, signal=58%	Nme2/Atp5g1/Atp5g2/Atp5j2/Ndufa13/Eno1/Ndufa7/Atp5e/Atp5b/Atp5h/Atp5d/Atp5j/Atp5c1/Ndufv3/Ndufa1/Ndufb11/Ndufa3/Ndufb4/Atp5o/Ndufa12/Ndufb5/Nme1/Ndufa11/Atp5l/Ndufs4/Ndufb9/Aldoa/Sdhb/Atp5k/Ndufb8/Ndufc2/Ndufa5/Ndufa8/Ndufv2/Ndufa2/Ndufs5/Ndufb10/Ndufb7/Ndufb2/Dguok/Pkm/Ndufs7/Ndufa6/Ndufc1/Ndufs8/Ndufb6/Ndufab1	GO Biological Process
CD8+ memory T	GO:0009145	purine nucleoside triphosphate biosynthetic process	75	0.783043	2.03111	1e-10	3.64938e-08	3.45e-08	683	tags=63%, list=10%, signal=57%	Nme2/Atp5g1/Atp5g2/Atp5j2/Ndufa13/Eno1/Ndufa7/Atp5e/Atp5b/Atp5h/Atp5d/Atp5j/Atp5c1/Ndufv3/Ndufa1/Ndufb11/Ndufa3/Ndufb4/Atp5o/Ndufa12/Ndufb5/Nme1/Ndufa11/Atp5l/Ndufs4/Ndufb9/Aldoa/Sdhb/Atp5k/Ndufb8/Ndufc2/Ndufa5/Ndufa8/Ndufv2/Ndufa2/Ndufs5/Ndufb10/Ndufb7/Ndufb2/Dguok/Pkm/Ndufs7/Ndufa6/Ndufc1/Ndufs8/Ndufb6/Ndufab1	GO Biological Process
CD8+ memory T	GO:0009201	ribonucleoside triphosphate biosynthetic process	77	0.779945	2.0272	1e-10	3.64938e-08	3.45e-08	683	tags=61%, list=10%, signal=55%	Nme2/Atp5g1/Atp5g2/Atp5j2/Ndufa13/Eno1/Ndufa7/Atp5e/Atp5b/Atp5h/Atp5d/Atp5j/Atp5c1/Ndufv3/Ndufa1/Ndufb11/Ndufa3/Ndufb4/Atp5o/Ndufa12/Ndufb5/Nme1/Ndufa11/Atp5l/Ndufs4/Ndufb9/Aldoa/Sdhb/Atp5k/Ndufb8/Ndufc2/Ndufa5/Ndufa8/Ndufv2/Ndufa2/Ndufs5/Ndufb10/Ndufb7/Ndufb2/Dguok/Pkm/Ndufs7/Ndufa6/Ndufc1/Ndufs8/Ndufb6/Ndufab1	GO Biological Process
CD8+ memory T	GO:0009142	nucleoside triphosphate biosynthetic process	81	0.769582	2.0099	1e-10	3.64938e-08	3.45e-08	683	tags=58%, list=10%, signal=53%	Nme2/Atp5g1/Atp5g2/Atp5j2/Ndufa13/Eno1/Ndufa7/Atp5e/Atp5b/Atp5h/Atp5d/Atp5j/Atp5c1/Ndufv3/Ndufa1/Ndufb11/Ndufa3/Ndufb4/Atp5o/Ndufa12/Ndufb5/Nme1/Ndufa11/Atp5l/Ndufs4/Ndufb9/Aldoa/Sdhb/Atp5k/Ndufb8/Ndufc2/Ndufa5/Ndufa8/Ndufv2/Ndufa2/Ndufs5/Ndufb10/Ndufb7/Ndufb2/Dguok/Pkm/Ndufs7/Ndufa6/Ndufc1/Ndufs8/Ndufb6/Ndufab1	GO Biological Process
CD8+ memory T	GO:0009152	purine ribonucleotide biosynthetic process	110	0.728228	1.94037	1e-10	3.64938e-08	3.45e-08	932	tags=51%, list=14%, signal=45%	Nme2/Atp5g1/Atp5g2/Atp5j2/Ndufa13/Eno1/Ndufa7/Atp5e/Atp5b/Atp5h/Atp5d/Atp5j/Atp5c1/Ndufv3/Ndufa1/Ndufb11/Ndufa3/Ndufb4/Atp5o/Ndufa12/Ndufb5/Nme1/Ndufa11/Atp5l/Ndufs4/Ndufb9/Aldoa/Sdhb/Atp5k/Ndufb8/Ndufc2/Ndufa5/Ndufa8/Ndufv2/Ndufa2/Mpc2/Ndufs5/Ndufb10/Ndufb7/Ndufb2/Dguok/Aprt/Pkm/Ndufs7/Mpc1/Ndufa6/Ndufc1/Ndufs8/Ndufb6/Ndufab1/Ndufs3/Ndufa9/Ndufa10/Hprt/Ndufb3/Adss	GO Biological Process
CD8+ memory T	GO:0006164	purine nucleotide biosynthetic process	114	0.722291	1.92594	1e-10	3.64938e-08	3.45e-08	932	tags=49%, list=14%, signal=43%	Nme2/Atp5g1/Atp5g2/Atp5j2/Ndufa13/Eno1/Ndufa7/Atp5e/Atp5b/Atp5h/Atp5d/Atp5j/Atp5c1/Ndufv3/Ndufa1/Ndufb11/Ndufa3/Ndufb4/Atp5o/Ndufa12/Ndufb5/Nme1/Ndufa11/Atp5l/Ndufs4/Ndufb9/Aldoa/Sdhb/Atp5k/Ndufb8/Ndufc2/Ndufa5/Ndufa8/Ndufv2/Ndufa2/Mpc2/Ndufs5/Ndufb10/Ndufb7/Ndufb2/Dguok/Aprt/Pkm/Ndufs7/Mpc1/Ndufa6/Ndufc1/Ndufs8/Ndufb6/Ndufab1/Ndufs3/Ndufa9/Ndufa10/Hprt/Ndufb3/Adss	GO Biological Process
CD8+ memory T	GO:0072522	purine-containing compound biosynthetic process	117	0.719423	1.92312	1e-10	3.64938e-08	3.45e-08	932	tags=48%, list=14%, signal=42%	Nme2/Atp5g1/Atp5g2/Atp5j2/Ndufa13/Eno1/Ndufa7/Atp5e/Atp5b/Atp5h/Atp5d/Atp5j/Atp5c1/Ndufv3/Ndufa1/Ndufb11/Ndufa3/Ndufb4/Atp5o/Ndufa12/Ndufb5/Nme1/Ndufa11/Atp5l/Ndufs4/Ndufb9/Aldoa/Sdhb/Atp5k/Ndufb8/Ndufc2/Ndufa5/Ndufa8/Ndufv2/Ndufa2/Mpc2/Ndufs5/Ndufb10/Ndufb7/Ndufb2/Dguok/Aprt/Pkm/Ndufs7/Mpc1/Ndufa6/Ndufc1/Ndufs8/Ndufb6/Ndufab1/Ndufs3/Ndufa9/Ndufa10/Hprt/Ndufb3/Adss	GO Biological Process
CD8+ memory T	GO:0009060	aerobic respiration	124	0.716816	1.92206	1e-10	3.64938e-08	3.45e-08	956	tags=53%, list=14%, signal=46%	Cox5b/Atp5j2/Park7/Ndufa13/Dnajc15/Ndufa7/Atp5e/Cox7a2/Atp5b/Atp5h/Atp5d/Atp5j/Uqcrb/Atp5c1/Cox5a/Ndufv3/Cox7c/Uqcr10/Ndufa1/Ndufb11/Ndufa3/Ndufb4/Atp5o/Chchd2/Ndufa12/Ndufb5/Ndufa11/Cox4i1/Cox7a2l/Ndufs4/Ndufb9/Sdhb/Atp5k/Ndufb8/Uqcrq/Ndufc2/Ndufa5/Ndufa8/Ndufv2/Bloc1s1/Ndufa2/Rhoa/Ndufs5/Ndufb10/Ndufb7/Ndufb2/Dguok/Uqcrfs1/Nop53/Ndufs7/Ndufa6/Ndufc1/Mdh2/Ndufs8/Ndufb6/Ndufab1/Uqcc2/Cycs/Ndufs3/…	GO Biological Process
CD8+ memory T	GO:0009260	ribonucleotide biosynthetic process	115	0.717243	1.91433	1e-10	3.64938e-08	3.45e-08	932	tags=49%, list=14%, signal=43%	Nme2/Atp5g1/Atp5g2/Atp5j2/Ndufa13/Eno1/Ndufa7/Atp5e/Atp5b/Atp5h/Atp5d/Atp5j/Atp5c1/Ndufv3/Ndufa1/Ndufb11/Ndufa3/Ndufb4/Atp5o/Ndufa12/Ndufb5/Nme1/Ndufa11/Atp5l/Ndufs4/Ndufb9/Aldoa/Sdhb/Atp5k/Ndufb8/Ndufc2/Ndufa5/Ndufa8/Ndufv2/Ndufa2/Mpc2/Ndufs5/Ndufb10/Ndufb7/Ndufb2/Dguok/Aprt/Pkm/Ndufs7/Mpc1/Ndufa6/Ndufc1/Ndufs8/Ndufb6/Ndufab1/Ndufs3/Ndufa9/Ndufa10/Hprt/Ndufb3/Adss	GO Biological Process
CD8+ memory T	GO:0046390	ribose phosphate biosynthetic process	119	0.710852	1.90146	1e-10	3.64938e-08	3.45e-08	932	tags=47%, list=14%, signal=41%	Nme2/Atp5g1/Atp5g2/Atp5j2/Ndufa13/Eno1/Ndufa7/Atp5e/Atp5b/Atp5h/Atp5d/Atp5j/Atp5c1/Ndufv3/Ndufa1/Ndufb11/Ndufa3/Ndufb4/Atp5o/Ndufa12/Ndufb5/Nme1/Ndufa11/Atp5l/Ndufs4/Ndufb9/Aldoa/Sdhb/Atp5k/Ndufb8/Ndufc2/Ndufa5/Ndufa8/Ndufv2/Ndufa2/Mpc2/Ndufs5/Ndufb10/Ndufb7/Ndufb2/Dguok/Aprt/Pkm/Ndufs7/Mpc1/Ndufa6/Ndufc1/Ndufs8/Ndufb6/Ndufab1/Ndufs3/Ndufa9/Ndufa10/Hprt/Ndufb3/Adss	GO Biological Process
CD8+ memory T	GO:0006412	translation	476	0.671674	1.85287	1e-10	3.64938e-08	3.45e-08	764	tags=31%, list=11%, signal=29%	Uba52/Rpl15/Rps18/Rpl32/Rplp0/Rpl10/Rps15a/Rps7/Rps3/Rps2/Rbm3/Rpl11/Rpl28/Rps11/Rpl34/Rpl24/Rpl9/Rps5/Rpl35/Rpl21/Rpl14/Rpl36/Rpl10a/Rps4x/Rpl13/Rpl8/Rpl26/Rpl39/Rpl3/Rpl22l1/Rpl19/Rps10/Rps13/Rpl12/Rpl6/Rps27a/Rpl17/Rpl29/Fau/Rpl18a/Rpl27a/Rps20/Rpl18/Rpl37/Gapdh/Eif3h/Rps16/Eef1b2/Rps23/Rps24/Rpsa/Rpl23/Lars2/Rpl7a/Rpl27/Rack1/Rpl30/Rps21/Rpl36a/Rpl7/Rps29/Rps3a1/Rps25/Rps19/Eef1a1/Vim/Rpl38/E…	GO Biological Process
CD8+ memory T	GO:0043043	peptide biosynthetic process	482	0.667512	1.84223	1e-10	3.64938e-08	3.45e-08	764	tags=30%, list=11%, signal=29%	Uba52/Rpl15/Rps18/Rpl32/Rplp0/Rpl10/Rps15a/Rps7/Rps3/Rps2/Rbm3/Rpl11/Rpl28/Rps11/Rpl34/Rpl24/Rpl9/Rps5/Rpl35/Rpl21/Rpl14/Rpl36/Rpl10a/Rps4x/Rpl13/Rpl8/Rpl26/Rpl39/Rpl3/Rpl22l1/Rpl19/Rps10/Rps13/Rpl12/Rpl6/Rps27a/Rpl17/Rpl29/Fau/Rpl18a/Rpl27a/Rps20/Rpl18/Rpl37/Gapdh/Eif3h/Rps16/Eef1b2/Rps23/Rps24/Rpsa/Rpl23/Lars2/Rpl7a/Rpl27/Rack1/Rpl30/Rps21/Rpl36a/Rpl7/Rps29/Rps3a1/Rps25/Rps19/Eef1a1/Vim/Rpl38/E…	GO Biological Process
CD8+ memory T	GO:0050864	regulation of B cell activation	92	-0.577331	-2.52583	3.10095e-10	9.52971e-08	9.00907e-08	495	tags=38%, list=7%, signal=36%	Bcl6/Peli1/Il4i1/Inpp5d/Xbp1/Rc3h1/Btk/Laptm5/Fcgr2b/Pten/Btla/Slc15a4/Mzb1/Ighg2b/Cd24a/Tnfrsf13b/Cd38/Ptpn6/Lyn/Iglc3/Siglecg/Blk/Cd22/Zfp36l1/Syk/Igha/Iglc2/Ighd/Cd19/Tnfrsf13c/Bank1/Mef2c/Cd74/Igkc/Ighm	GO Biological Process
CD8+ memory T	GO:0042254	ribosome biogenesis	232	0.622197	1.69284	4.56031e-10	1.19907e-07	1.13357e-07	1335	tags=37%, list=20%, signal=30%	Rplp0/Rpl10/Rps7/Rps2/Rpl11/Rpl24/Rps5/Rpl35/Rpl14/Rpl10a/Rpl26/Rpl6/Rps16/Rps24/Rpsa/Rpl7a/Rps27/Rpl27/Rps21/Rpl7/Rps25/Rps19/Rpl38/Rps14/Rps28/Rpl5/Rps6/Rps8/Npm1/Rpl35a/Nsa2/Trmt112/Nop10/Rbis/Eif6/Pa2g4/Snu13/Rps17/Nhp2/Ran/Npm3/Exosc8/Imp3/Ncl/Mrpl20/Nop53/Mak16/Fbl/C1qbp/Exosc7/Rps27rt/Ebna1bp2/Emg1/Pak1ip1/Rpl23a/Nop58/Ddx21/Dkc1/Lsm6/Wdr43/Fcf1/Utp14a/Pin4/Ddx27/Pop5/Utp3/Mrto4/Exosc5/Rsl…	GO Biological Process
CD8+ memory T	mmu04662	B cell receptor signaling pathway - Mus musculus (house mouse)	60	-0.643154	-2.44426	5.03314e-09	1.2157e-07	1.09221e-07	729	tags=53%, list=11%, signal=48%	Cd81/Akt2/Rela/Pik3ap1/Pik3ca/Grb2/Pik3r1/Vav1/Inpp5d/Ppp3r1/Plcg2/Nfatc3/Nfatc1/Btk/Rasgrp3/Fcgr2b/Malt1/Prkcb/Cd72/Ptpn6/Ppp3ca/Lyn/Nfkb1/Blnk/Blk/Cd22/Syk/Cd19/Bank1/Cd79b/Cd79a/Cr2	Kegg Pathway
CD8+ memory T	mmu04932	Non-alcoholic fatty liver disease - Mus musculus (house mouse)	105	0.691742	1.84369	1.5449e-08	3.46498e-07	3.11302e-07	937	tags=53%, list=14%, signal=46%	Cox8a/Cox5b/Cox6c/Cox7b/Ndufa13/Ndufa7/Cox7a2/Uqcrb/Ndufa4/Cox5a/Cox6b1/Ndufv3/Cox7c/Uqcr10/Ndufa1/Ndufb11/Ndufa3/Ndufb4/Ndufa12/Ndufb5/Bax/Ndufa11/Cox4i1/Cox7a2l/Ndufs4/Ndufb9/Sdhb/Ndufb8/Uqcrq/Ndufc2/Ndufa5/Ndufa8/Ndufv2/Ndufa2/Ndufs5/Ndufb10/Ndufb7/Ndufb2/Uqcrfs1/Ndufs7/Ndufa6/Ndufc1/Ndufs8/Ndufb6/Ndufab1/Cycs/Ndufs3/Uqcr11/Ndufa9/Uqcrc2/Ndufa10/Il6ra/Socs3/Ndufb3/Uqcrh/Cyc1	Kegg Pathway
CD8+ memory T	GO:0016064	immunoglobulin mediated immune response	82	-0.562824	-2.36685	1.30087e-08	2.71278e-06	2.56457e-06	403	tags=38%, list=6%, signal=36%	Bcl6/H2-Oa/Tcirg1/Inpp5d/Ccr6/H2-Eb1/Btk/Fcgr2b/Icosl/Slc15a4/Prkcd/H2-DMb1/H2-Ob/Ighg2b/Ptpn6/Hspd1/H2-DMb2/Swap70/H2-Ab1/Fcer2a/Iglc3/H2-Aa/Igha/Iglc2/Ighd/Cd19/Pou2f2/Cd74/Cr2/Igkc/Ighm	GO Biological Process
CD8+ memory T	GO:0046034	ATP metabolic process	114	0.681473	1.8171	1.88246e-08	3.5457e-06	3.35199e-06	921	tags=49%, list=14%, signal=43%	Gapdh/Atp5g1/Atp5g2/Atp5j2/Ndufa13/Tspo/Eno1/Ndufa7/Atp5e/Atp5b/Atp5h/Atp5d/Atp5j/Atp5c1/Ndufv3/Ndufa1/Ndufb11/Ndufa3/Ndufb4/Atp5o/Ndufa12/Ndufb5/Ndufa11/Atp5l/Ndufs4/Ndufb9/Aldoa/Sdhb/Atp5k/Ndufb8/Ndufc2/Ndufa5/Ndufa8/Ndufv2/Eif6/Fis1/Ndufa2/Ndufs5/Ndufb10/Ndufb7/Ndufb2/Dguok/Pkm/Ndufs7/Ndufa6/Atpif1/Ndufc1/Ndufs8/Ndufb6/Ola1/Ndufab1/Ndufs3/Ndufa9/Gpi1/Ndufa10/Ndufb3	GO Biological Process
CD8+ memory T	GO:0050853	B cell receptor signaling pathway	48	-0.665308	-2.58891	3.08628e-08	5.63149e-06	5.32383e-06	331	tags=50%, list=5%, signal=48%	Plcg2/Stap1/Btk/Lat2/Prkcb/Ighg2b/Cd38/Ptpn6/Lyn/Iglc3/Blnk/Blk/Cd22/Syk/Igha/Iglc2/Ighd/Cd19/Mef2c/Cd79b/Cd79a/Ms4a1/Igkc/Ighm	GO Biological Process
CD8+ memory T	GO:0072521	purine-containing compound metabolic process	205	0.606628	1.64796	3.42096e-08	6.05303e-06	5.72233e-06	932	tags=33%, list=14%, signal=29%	Nme2/Gapdh/Atp5g1/Atp5g2/Atp5j2/Ndufa13/Tspo/Eno1/Ndufa7/Atp5e/Hint1/Atp5b/Atp5h/Atp5d/Atp5j/Atp5c1/Nt5c/Ndufv3/Ndufa1/Ndufb11/Ndufa3/Ndufb4/Atp5o/Ndufa12/Ndufb5/Nme1/Ndufa11/Atp5l/Ndufs4/Ndufb9/Aldoa/Sdhb/Atp5k/Ndufb8/Ndufc2/Ndufa5/Ndufa8/Ndufv2/Eif6/Fis1/Ndufa2/Mpc2/Rhoa/Ndufs5/Ndufb10/Ran/Ndufb7/Ndufb2/Dguok/Aprt/Pkm/Ndufs7/Mpc1/Ndufa6/Atpif1/Ndufc1/Ndufs8/Ndufb6/Ola1/Ndufab1/Ndufs3/Ndufa9/Gpi…	GO Biological Process
CD8+ memory T	GO:0006364	rRNA processing	167	0.628339	1.70002	5.826e-08	8.95211e-06	8.46303e-06	1015	tags=32%, list=15%, signal=28%	Rps7/Rpl11/Rpl35/Rpl14/Rpl10a/Rpl26/Rps16/Rps24/Rpl7a/Rps27/Rpl27/Rps21/Rpl7/Rps25/Rps19/Rps14/Rps28/Rpl5/Rps6/Rps8/Npm1/Rpl35a/Nsa2/Trmt112/Nop10/Eif6/Pa2g4/Snu13/Rps17/Nhp2/Npm3/Exosc8/Imp3/Ncl/Nop53/Mak16/Fbl/Exosc7/Rps27rt/Ebna1bp2/Emg1/Ddx21/Dkc1/Lsm6/Wdr43/Fcf1/Utp14a/Pin4/Ddx27/Pop5/Utp3/Mrto4/Exosc5	GO Biological Process
CD8+ memory T	GO:0042100	B cell proliferation	53	-0.64653	-2.57001	6.19628e-08	9.04502e-06	8.55087e-06	302	tags=45%, list=5%, signal=44%	Rc3h1/Btk/Fcgr2b/Pten/Btla/Prkcd/Cd180/Mzb1/Cd24a/Tnfrsf13b/Cd38/Hspd1/Lyn/Siglecg/Blk/Cd22/Ighd/Cd19/Tnfrsf13c/Mef2c/Cd74/Cd79a/Cr2/Ighm	GO Biological Process
CD8+ memory T	GO:0030888	regulation of B cell proliferation	40	-0.689506	-2.58649	1.07958e-07	1.50087e-05	1.41887e-05	566	tags=55%, list=9%, signal=51%	Clcf1/Bcl6/Peli1/Inpp5d/Rc3h1/Btk/Fcgr2b/Pten/Btla/Mzb1/Cd24a/Tnfrsf13b/Cd38/Lyn/Siglecg/Blk/Cd22/Ighd/Tnfrsf13c/Mef2c/Cd74/Ighm	GO Biological Process
CD8+ memory T	GO:0016072	rRNA metabolic process	187	0.606969	1.64313	1.12876e-07	1.53275e-05	1.44901e-05	1550	tags=41%, list=23%, signal=32%	Rps7/Rpl11/Rpl35/Rpl14/Rpl10a/Rpl26/Rps16/Rps24/Rpl7a/Rps27/Rpl27/Rps21/Rpl7/Rps25/Rps19/Rps14/Rps28/Rpl5/Rps6/Rps8/Npm1/Rpl35a/Nsa2/Trmt112/Nop10/Eif6/Pa2g4/Snu13/Rps17/Nhp2/Npm3/Exosc8/Imp3/Ncl/Nop53/Mak16/Fbl/Exosc7/Rps27rt/Ebna1bp2/Emg1/Ddx21/Dkc1/Lsm6/Xrn1/Wdr43/Fcf1/Zcchc7/Utp14a/Pin4/Ddx27/Pop5/Utp3/Mrto4/Exosc5/Exosc1/Exosc4/Trir/Trp53/Utp11/Rrp1/Rps15/Wdr74/Pop7/Rsl1d1/Nop14/Tsr3/C1d/Frg…	GO Biological Process
CD8+ memory T	GO:0015078	proton transmembrane transporter activity	54	0.762125	1.91483	6.66406e-08	1.69767e-05	1.53098e-05	956	tags=59%, list=14%, signal=51%	Cox8a/Atp5g1/Cox6c/Atp5g2/Atp5j2/Cox7b/Slc25a4/Atp5e/Cox7a2/Atp5b/Atp5h/Atp5d/Atp5j/Atp5c1/Cox5a/Cox7c/Atp5o/Atp6v0e/Slc25a5/Atp6v1f/Cox4i1/Atp5l/Cox7a2l/Atp5k/Uqcrq/Uqcrfs1/Atp6v0c/Uqcr11/Atp6v1e1/Atp6v1g1/Uqcrh/Cyc1	GO Molecular Function
CD8+ memory T	GO:0042255	ribosome assembly	48	0.775054	1.94814	3.66263e-07	4.55023e-05	4.30164e-05	172	tags=31%, list=3%, signal=31%	Rplp0/Rpl10/Rps2/Rpl11/Rpl24/Rps5/Rpl6/Rpsa/Rps27/Rps25/Rps19/Rpl38/Rps14/Rps28/Rpl5	GO Biological Process
CD8+ memory T	mmu05143	African trypanosomiasis - Mus musculus (house mouse)	11	0.938291	1.87799	2.31173e-06	4.83922e-05	4.34767e-05	4	tags=36%, list=0%, signal=36%	Hbb-bs/Hba-a1/Hba-a2/Hbb-bt	Kegg Pathway
CD8+ memory T	mmu04723	Retrograde endocannabinoid signaling - Mus musculus (house mouse)	61	0.725272	1.85947	2.633e-06	5.16727e-05	4.6424e-05	904	tags=56%, list=14%, signal=48%	Ndufa13/Ndufa7/Gng5/Ndufa4/Ndufv3/Ndufa1/Ndufb11/Ndufa3/Ndufb4/Ndufa12/Ndufb5/Ndufa11/Ndufs4/Ndufb9/Ndufb8/Ndufc2/Ndufa5/Ndufa8/Ndufv2/Ndufa2/Ndufs5/Ndufb10/Ndufb7/Ndufb2/Ndufs7/Ndufa6/Ndufc1/Ndufs8/Ndufb6/Ndufab1/Ndufs3/Ndufa9/Ndufa10/Ndufb3	Kegg Pathway
CD8+ memory T	GO:1901137	carbohydrate derivative biosynthetic process	268	0.55536	1.51479	1.77133e-06	0.000198899	0.000188033	986	tags=28%, list=15%, signal=25%	Nme2/Atp5g1/Atp5g2/Atp5j2/Ndufa13/Bcl2/Eno1/Dad1/Itm2b/Ndufa7/Krtcap2/Atp5e/Atp5b/Atp5h/Atp5d/Atp5j/Atp5c1/Ndufv3/Ost4/Ndufa1/Ndufb11/Ndufa3/Ndufb4/Atp5o/Ndufa12/Ndufb5/Nme1/Dpm3/Ndufa11/Atp5l/Ccnd3/Ndufs4/Ndufb9/Aldoa/Sdhb/Atp5k/Ndufb8/Tmem258/Ndufc2/Ndufa5/Ndufa8/Ndufv2/Tmem59/Ndufa2/Dpm1/Mpc2/Ndufs5/Ndufb10/Ndufb7/Ndufb2/Dguok/Aprt/Pkm/Ndufs7/Mpc1/Ndufa6/Ndufc1/Ndufs8/Ndufb6/Ndufab1/Alg5/Ndufs…	GO Biological Process
CD8+ memory T	mmu05144	Malaria - Mus musculus (house mouse)	13	0.894854	1.85859	1.43604e-05	0.000265245	0.000238303	4	tags=31%, list=0%, signal=31%	Hbb-bs/Hba-a1/Hba-a2/Hbb-bt	Kegg Pathway
CD8+ memory T	GO:0015399	primary active transmembrane transporter activity	77	0.694476	1.80197	1.52128e-06	0.000310037	0.000279595	1060	tags=51%, list=16%, signal=43%	Cox8a/Cox6c/Sec61g/Cox7b/Ndufa7/Atp5e/Cox7a2/Atp5b/Cox5a/Cox7c/Atp6v0e/Atp6v1f/Cox4i1/Atp5l/Cox7a2l/Ndufs4/Ndufb8/Uqcrq/Ndufc2/Tomm20/Ndufv2/Atp1b3/Ndufa2/Atp1a1/Ndufb7/Uqcrfs1/Ndufs7/Ndufs8/Ndufs3/Atp6v0c/Uqcr11/Atp6v1e1/Tap1/Atp6v1g1/Ndufa10/Uqcrh/Cyc1/Surf1/Ndufv1	GO Molecular Function
CD8+ memory T	GO:0009055	electron transfer activity	43	0.769328	1.90036	2.12639e-06	0.000323265	0.000291525	1060	tags=70%, list=16%, signal=59%	Cox8a/Cyba/Cox6c/Cox7b/Ndufa7/Cox7a2/Cox5a/Cox7c/Cox4i1/Cox7a2l/Ndufs4/Sdhb/Ndufb8/Uqcrq/Ndufc2/Ndufv2/Ndufa2/Etfb/Ndufb7/Uqcrfs1/Ndufs7/Ndufs8/Ndufs3/Uqcr11/Ndufa10/Uqcrh/Cyc1/Fdx2/Surf1/Ndufv1	GO Molecular Function
CD8+ memory T	GO:0035821	modulation of process of another organism	8	-0.931626	-2.18589	3.92011e-06	0.000416343	0.000393597	50	tags=75%, list=1%, signal=75%	Bcl2l11/Fcer2a/Ltf/Syk/Camp/S100a9	GO Biological Process
CD8+ memory T	GO:0000028	ribosomal small subunit assembly	16	0.895472	1.91034	3.78973e-06	0.000416343	0.000393597	170	tags=56%, list=3%, signal=55%	Rps2/Rps5/Rpsa/Rps27/Rps25/Rps19/Rpl38/Rps14/Rps28	GO Biological Process
CD8+ memory T	GO:0033108	mitochondrial respiratory chain complex assembly	64	0.697527	1.79398	4.43761e-06	0.0004627	0.000437421	1564	tags=72%, list=24%, signal=55%	Ndufa1/Ndufb11/Ndufa3/Ndufb4/Ndufa12/Ndufb5/Ndufa11/Ndufs4/Ndufb9/Ndufb8/Ndufc2/Ndufa5/Ndufa8/Ndufa2/Ndufs5/Ndufb10/Ndufb7/Ndufb2/Pet100/Ndufs7/Ndufa6/Ndufc1/Ndufs8/Ndufb6/Ndufab1/Uqcc2/Cox16/Ndufs3/Coa3/Ndufa9/Sdhaf1/Ndufa10/Ndufb3/Sdhaf4/Cox20/Ndufaf8/Surf1/Cox17/Tmem126a/Ndufaf3/Ndufaf2/Ndufs6/Ttc19/Chchd7/Dmac2/Cox18	GO Biological Process
CD8+ memory T	GO:1901798	positive regulation of signal transduction by p53 class mediator	19	0.869977	1.92603	4.85964e-06	0.000481323	0.000455027	97	tags=37%, list=1%, signal=36%	Ubb/Rps7/Rpl11/Rpl26/Rps20/Rpl37/Rpl23	GO Biological Process
CD8+ memory T	mmu04260	Cardiac muscle contraction - Mus musculus (house mouse)	29	0.783627	1.83951	3.22046e-05	0.000561792	0.000504728	937	tags=72%, list=14%, signal=62%	Cox8a/Cox5b/Cox6c/Cox7b/Cox7a2/Uqcrb/Cox5a/Cox6b1/Cox7c/Uqcr10/Cox4i1/Cox7a2l/Tpm3/Uqcrq/Atp1b3/Atp1a1/Uqcrfs1/Uqcr11/Uqcrc2/Uqcrh/Cyc1	Kegg Pathway
CD8+ memory T	GO:0002377	immunoglobulin production	88	-0.475709	-2.0837	6.37164e-06	0.000600065	0.000567282	495	tags=28%, list=7%, signal=27%	Bcl6/H2-Oa/Foxp1/Tcirg1/Ccr6/Xbp1/Vpreb3/H2-Eb1/Btk/Fcgr2b/Icosl/Slc15a4/H2-DMb1/H2-Ob/Mzb1/Hspd1/H2-DMb2/Swap70/H2-Ab1/H2-Aa/Siglecg/Cd22/Ighd/Pou2f2/Ighm	GO Biological Process
CD8+ memory T	mmu04672	Intestinal immune network for IgA production - Mus musculus (house mouse)	20	-0.73882	-2.18043	4.2152e-05	0.000696617	0.000625858	680	tags=70%, list=10%, signal=63%	H2-Eb2/Tgfb1/H2-Oa/H2-Eb1/Icosl/Cxcr4/H2-DMb1/H2-Ob/Ccr9/Tnfrsf13b/H2-DMb2/H2-Ab1/H2-Aa/Tnfrsf13c	Kegg Pathway
CD8+ memory T	GO:0001227	DNA-binding transcription repressor activity, RNA polymerase II-specific	114	-0.429498	-1.97398	8.92263e-06	0.000817164	0.000736929	706	tags=34%, list=11%, signal=31%	Ski/Bach1/Trps1/Foxk1/Zfp597/Zfp961/Zfp626/Rest/Tcf3/Nr3c1/Nfatc2/Zbtb2/Spi1/Zbtb7a/Zfp120/Rela/Srebf2/Zfp217/Atf7/Gata3/Ikzf1/Bcl6/Foxp1/Zfp148/Nfatc3/Sp3/Nfatc1/Zbtb4/Zeb2/Zbtb18/Hhex/Purb/Etv3/Mxd4/Bach2/Zbtb20/Nfkb1/Irf8/Bcl11a	GO Molecular Function
CD8+ memory T	mmu03050	Proteasome - Mus musculus (house mouse)	44	0.724892	1.79418	6.96663e-05	0.00109376	0.000982661	953	tags=61%, list=15%, signal=53%	Psmb8/Psme2/Psme1/Psma2/Psmb1/Psmb10/Psmb2/Psmb3/Psma7/Psmb5/Psmb6/Psma5/Psmd8/Pomp/Psma4/Psmb9/Psma3/Psmc4/Psmd12/Psmd7/Psmd4/Psmc2/Psmc5/Sem1/Psmc3/Psma6/Psmd14	Kegg Pathway
CD8+ memory T	mmu05310	Asthma - Mus musculus (house mouse)	9	-0.871042	-2.11692	0.00010509	0.00157135	0.00141174	680	tags=89%, list=10%, signal=80%	H2-Eb2/H2-Oa/H2-Eb1/H2-DMb1/H2-Ob/H2-DMb2/H2-Ab1/H2-Aa	Kegg Pathway
CD8+ memory T	GO:0070663	regulation of leukocyte proliferation	130	-0.388814	-1.7832	2.44791e-05	0.00213334	0.00201679	577	tags=32%, list=9%, signal=29%	Scrib/Clcf1/Clec2i/Tmem131l/Bcl6/Peli1/Il4i1/Inpp5d/St6gal1/Rc3h1/Btk/Laptm5/Fcgr2b/Icosl/Hhex/Ctnnb1/Pten/Btla/Sdc4/H2-DMb1/Cd4/Itgal/Mzb1/Cd24a/Rassf5/Tnfrsf13b/Cd38/Ptpn6/Ppp3ca/Lyn/H2-DMb2/H2-Aa/Siglecg/Blk/Cd22/Syk/Ighd/Tnfrsf13c/Mef2c/Cd74/Ighm	GO Biological Process
CD8+ memory T	mmu05152	Tuberculosis - Mus musculus (house mouse)	92	-0.409174	-1.71875	0.000211918	0.00302464	0.00271741	706	tags=40%, list=11%, signal=36%	Bid/Rfx5/Ppp3cb/Lamp2/Tlr1/Creb1/Akt2/H2-Eb2/Rela/Tgfb1/Atp6v0b/Atp6ap1/Irak1/Mapk14/H2-Oa/Crebbp/Tcirg1/Camk2d/Ppp3r1/Il10ra/H2-Eb1/Nfya/Fcgr2b/Ep300/H2-DMb1/Malt1/H2-Ob/Hspd1/Ppp3ca/Ciita/H2-DMb2/H2-Ab1/Nfkb1/H2-Aa/Syk/Camp/Cd74	Kegg Pathway
CD8+ memory T	GO:0035325	Toll-like receptor binding	6	-0.936611	-1.96113	5.17822e-05	0.00405893	0.0036604	46	tags=67%, list=1%, signal=66%	Tlr1/Unc93b1/Syk/S100a8	GO Molecular Function
CD8+ memory T	GO:0003746	translation elongation factor activity	14	0.868989	1.80058	7.02275e-05	0.00420952	0.0037962	260	tags=36%, list=4%, signal=34%	Eef1b2/Eef1a1/Eef1d/Eif5a/Eef2	GO Molecular Function
CD8+ memory T	GO:0055105	ubiquitin-protein transferase inhibitor activity	7	0.948883	1.73421	6.90306e-05	0.00420952	0.0037962	172	tags=86%, list=3%, signal=84%	Rps7/Rpl11/Rps20/Rpl37/Rpl23/Rpl5	GO Molecular Function
CD8+ memory T	GO:1990948	ubiquitin ligase inhibitor activity	7	0.948883	1.73421	6.90306e-05	0.00420952	0.0037962	172	tags=86%, list=3%, signal=84%	Rps7/Rpl11/Rps20/Rpl37/Rpl23/Rpl5	GO Molecular Function
CD8+ memory T	GO:0019886	antigen processing and presentation of exogenous peptide antigen via MHC class II	17	-0.769248	-2.25756	5.92371e-05	0.00487163	0.00460548	461	tags=71%, list=7%, signal=66%	H2-Oa/Pikfyve/Ifi30/H2-Eb1/Fcgr2b/H2-DMb1/H2-Ob/H2-DMb2/H2-Ab1/Unc93b1/H2-Aa/Cd74	GO Biological Process
CD8+ memory T	GO:0140053	mitochondrial gene expression	118	0.604086	1.61431	5.88007e-05	0.00487163	0.00460548	1408	tags=46%, list=21%, signal=37%	Lars2/Ndufa7/Mrpl23/Mrps24/Mrpl52/Mrps16/Mrpl58/Mrpl33/Mrps14/Mrpl54/Aurkaip1/Mrpl30/Hsd17b10/Mrps18c/Mrps34/Mrpl18/Mrpl57/Chchd1/Mrpl43/Mrpl20/Mrps33/C1qbp/Mrpl24/Uqcc2/Mrpl34/Mrpl42/Mrpl21/Coa3/Mrpl15/Mrps26/Mrpl17/Mrpl40/Mrps17/Gars/Mrps28/Mrpl36/Mrpl27/Mrps5/Mrpl11/Mrpl35/Mrps15/Mrps21/Mrpl55/Mrpl32/Mrps12/Mrpl48/Malsu1/Mrpl22/Mrps18b/Mrps10/Mrpl12/Mrpl19/Mrps18a/Mrpl14	GO Biological Process
CD8+ memory T	GO:0030856	regulation of epithelial cell differentiation	45	-0.543587	-2.06161	6.78837e-05	0.00539054	0.00509604	781	tags=44%, list=12%, signal=39%	Foxj2/Stat5b/Ptch1/Zdhhc21/Rock1/Akap11/Rock2/Gata3/Vezf1/Foxp1/Notch1/Sgpp1/Zeb2/Numa1/Ctnnb1/Dicer1/Srsf6/Cd24a/Zfp36/Zfp36l1	GO Biological Process
CD8+ memory T	GO:0031397	negative regulation of protein ubiquitination	54	0.6882	1.73994	7.04244e-05	0.00548278	0.00518324	545	tags=24%, list=8%, signal=22%	Rps7/Rps3/Rpl11/Ppia/Rpl23/Park7/Tspo/Rpl5/Vps28/Isg15/Ubxn1/Smad7/Gps2	GO Biological Process
CD8+ memory T	GO:0050866	negative regulation of cell activation	95	-0.424151	-1.7714	7.70841e-05	0.00584538	0.00552603	673	tags=33%, list=10%, signal=30%	Tbc1d10c/Tgfb1/Scrib/Tmem131l/Bcl6/Rc3h2/Peli1/Il4i1/Sh2b3/Inpp5d/Cbfb/Runx1/Rc3h1/Cnr2/Btk/Laptm5/Fcgr2b/Dtx1/Pten/Btla/Sdc4/Prkcd/Cd24a/Rassf5/Tnfrsf13b/Ptpn6/Lyn/H2-Aa/Blk/Bank1/Cd74	GO Biological Process
CD8+ memory T	GO:1902255	positive regulation of intrinsic apoptotic signaling pathway by p53 class mediator	6	0.954633	1.70324	9.25184e-05	0.00679093	0.00641993	45	tags=67%, list=1%, signal=66%	Ubb/Rps7/Rpl11/Rpl26	GO Biological Process
CD8+ memory T	GO:0032869	cellular response to insulin stimulus	103	-0.405279	-1.69126	0.000109059	0.00776583	0.00734156	892	tags=35%, list=13%, signal=31%	Socs7/Rb1/Sorl1/Ywhag/Tbc1d4/Hnrnpk/Parp1/Zfp592/Akt2/Rela/Pip4k2b/Igf1r/Eif4ebp2/Rhoq/Kat2b/Grb2/Sp1/Zfp106/Pik3r1/Ptprj/Bcar3/Rps6kb1/Xbp1/Ogt/C2cd5/Myo1c/Pip4k2a/Pten/Prkcd/Sesn3/Prkcb/Mzb1/Marcks/Grk2/Phip/Zfp36l1	GO Biological Process
CD8+ memory T	GO:0034104	negative regulation of tissue remodeling	6	-0.928101	-2.02773	0.000131677	0.00904546	0.00855128	386	tags=67%, list=6%, signal=63%	Inpp5d/Csk/Cd24a/Cd38	GO Biological Process
CD8+ memory T	GO:0004298	threonine-type endopeptidase activity	11	0.884707	1.75078	0.000223778	0.00922878	0.00832263	458	tags=82%, list=7%, signal=76%	Psmb8/Psmb1/Psmb10/Psmb2/Psmb3/Psmb5/Psmb6/Psma4/Psmb9	GO Molecular Function
CD8+ memory T	GO:0042288	MHC class I protein binding	21	0.79106	1.74252	0.000226418	0.00922878	0.00832263	906	tags=62%, list=14%, signal=54%	Cd8b1/H2-D1/Atp5b/H2-Q4/H2-T23/H2-Q7/Pdia3/Klrk1/H2-K1/Tubb5/Bcap31/Tap1/H2-T22	GO Molecular Function
CD8+ memory T	GO:0023026	MHC class II protein complex binding	12	-0.803083	-2.11956	0.000236343	0.00926283	0.00835334	461	tags=83%, list=7%, signal=78%	H2-Eb2/H2-Oa/H2-Eb1/H2-DMb1/Cd4/H2-Ob/H2-DMb2/H2-Ab1/H2-Aa/Cd74	GO Molecular Function
CD8+ memory T	GO:0071826	ribonucleoprotein complex subunit organization	139	0.581823	1.56364	0.000140279	0.00941479	0.00890043	758	tags=24%, list=11%, signal=21%	Rplp0/Rpl10/Rps2/Rpl11/Rpl24/Rps5/Rpl6/Rpsa/Snrpd2/Rps27/Rps25/Rps19/Rpl38/Rps14/Snrpg/Rps28/Rpl5/Rpl13a/Lsm4/Snrpe/Snrpf/Srpk1/Eif2s2/Eif6/Snu13/Snrpd3/Snrpd1/Mrpl20/Nop53/Snrpb/Nudt21/Rpl23a/Denr	GO Biological Process
CD8+ memory T	GO:0051216	cartilage development	57	-0.491481	-2.0189	0.000158799	0.0103025	0.00973965	1034	tags=35%, list=16%, signal=30%	Axin2/Pbxip1/Eif2ak3/Zbtb7a/Rb1/Glg1/Lrp6/Rela/Tgfb1/Mapk14/Rflnb/Runx1/Maf/Hif1a/Ctnnb1/Dicer1/Ep300/Mef2d/Mef2c/Cr2	GO Biological Process
CD8+ memory T	mmu05150	Staphylococcus aureus infection - Mus musculus (house mouse)	15	-0.734479	-2.06064	0.00078702	0.0107445	0.00965315	448	tags=73%, list=7%, signal=68%	H2-Eb2/H2-Oa/H2-Eb1/Fcgr2b/H2-DMb1/Itgal/H2-Ob/H2-DMb2/H2-Ab1/H2-Aa/Camp	Kegg Pathway
CD8+ memory T	GO:0004129	cytochrome-c oxidase activity	10	0.889534	1.74431	0.000328358	0.0111532	0.0100581	351	tags=80%, list=5%, signal=76%	Cox8a/Cox6c/Cox7b/Cox7a2/Cox5a/Cox7c/Cox4i1/Cox7a2l	GO Molecular Function
CD8+ memory T	GO:0031386	protein tag	11	0.8783	1.7381	0.000322092	0.0111532	0.0100581	721	tags=82%, list=11%, signal=73%	Uba52/Ubb/Rps27a/Sumo2/Ubl5/Nedd8/Isg15/Sumo1/Ubc	GO Molecular Function
CD8+ memory T	GO:0004888	transmembrane signaling receptor activity	118	-0.362903	-1.67797	0.000322036	0.0111532	0.0100581	608	tags=27%, list=9%, signal=25%	Ptk2b/Igf1r/Nrp1/Clec2i/Gpr132/Clec2d/Abca1/Ccr6/Ffar1/Notch1/Il10ra/Cnr2/H2-Eb1/Gpr174/Fcgr2b/Fcrl1/P2ry10/Cxcr4/Cd4/Itgal/Cd180/Fcrla/Cd72/Ccr9/Ctsh/Fcmr/Ptpn6/Cd74/Cd79b/Cd79a/Cr2/Ighm	GO Molecular Function
CD8+ memory T	GO:0004601	peroxidase activity	17	0.813561	1.73971	0.000350239	0.0115127	0.0103823	605	tags=59%, list=9%, signal=54%	Hba-a1/Hbb-bt/Park7/Gpx4/Selenof/Prdx1/Gstp1/Prdx6/Prdx5/Txndc17	GO Molecular Function
CD8+ memory T	GO:0035924	cellular response to vascular endothelial growth factor stimulus	18	-0.719638	-2.15804	0.000190957	0.0119892	0.0113342	682	tags=61%, list=10%, signal=55%	Rela/Pik3ca/Prkd2/Nrp1/Mapk14/Ptp4a3/Xbp1/Nus1/Notch1/Myo1c/Tcf4	GO Biological Process
CD8+ memory T	GO:0048706	embryonic skeletal system development	27	-0.632509	-2.1371	0.000190774	0.0119892	0.0113342	514	tags=26%, list=8%, signal=24%	Ndst1/Sp1/Sp3/Mbtd1/Ctnnb1/Pax5/Mef2c	GO Biological Process
CD8+ memory T	GO:0035850	epithelial cell differentiation involved in kidney development	9	-0.856925	-2.13339	0.00021376	0.0131433	0.0124253	552	tags=78%, list=8%, signal=71%	Gata3/Notch1/Myo1e/Ctnnb1/Cd24a/Mtss1/Mef2c	GO Biological Process
CD8+ memory T	GO:0043255	regulation of carbohydrate biosynthetic process	40	-0.563289	-2.11302	0.000213841	0.0131433	0.0124253	1157	tags=50%, list=17%, signal=42%	Nr3c1/Ddb1/Ppp4r3a/Ptger4/Gfpt1/Akt2/Ranbp2/Tgfb1/Epm2aip1/Ptk2b/Dyrk2/Kat2b/Ppp1cb/Ppp4r3b/Ogt/Hif1a/Ep300/Cltc/Usp7/Nfkb1	GO Biological Process
CD8+ memory T	GO:0051085	chaperone cofactor-dependent protein refolding	23	-0.682553	-2.19673	0.000241548	0.0145402	0.0137458	242	tags=30%, list=4%, signal=29%	Ptges3/Hspa8/H2-DMb1/H2-DMb2/Dnajb1/Cd74/Hsph1	GO Biological Process
CD8+ memory T	GO:0140030	modification-dependent protein binding	121	-0.349867	-1.63684	0.000525272	0.0157427	0.014197	1710	tags=41%, list=26%, signal=31%	Rnf169/Dnajb2/Msh6/Yeats2/Ikbkg/Trp53bp1/Mindy2/Zbtb1/Ubqln4/Ide/Rad23b/Cbx4/Cbx5/Phf8/Psme4/Chd8/Ing1/Fmr1/Ubqln2/Brd2/Vcp/Tnip1/Taf1/Kdm4a/Phf1/Brd4/Baz2a/Kdm5a/Suz12/Hgs/Uimc1/Zmynd11/Dpf2/Kmt2e/Mtf2/Vav1/Eps15/Atrx/Plcg2/Zmynd8/Mbtd1/Laptm5/Kdm7a/Ubqln1/Tab2/Cbx7/Ptpn6/Hspd1/Lyn/Phip	GO Molecular Function
CD8+ memory T	GO:0045182	translation regulator activity	96	0.59391	1.56193	0.000621484	0.0180941	0.0163175	758	tags=27%, list=11%, signal=24%	Rpl10/Eif3h/Eef1b2/Eef1a1/Eef1d/Rps14/Eif5a/Eif1/Cirbp/Eif3k/Eif3i/Rpl22/Eif3f/Eif3m/Eef2/Eif4a1/Rps9/Mrpl58/Eif3c/Eif2s2/Eif6/Eif3e/Eif4e2/Eif1a/Cnbp/Denr	GO Molecular Function
CD8+ memory T	GO:0045671	negative regulation of osteoclast differentiation	9	-0.848048	-2.11129	0.000312665	0.0186291	0.0176114	538	tags=67%, list=8%, signal=61%	Clec2i/Clec2d/Pik3r1/Inpp5d/Ctnnb1/Tob2	GO Biological Process
CD8+ memory T	GO:0032868	response to insulin	116	-0.369264	-1.66131	0.000322036	0.0189936	0.017956	892	tags=33%, list=13%, signal=29%	Socs7/Rb1/Sorl1/Ywhag/Tbc1d4/Hnrnpk/Parp1/Zfp592/Akt2/Rela/Pip4k2b/Epm2aip1/Igf1r/Eif4ebp2/Rhoq/Kat2b/Grb2/Sp1/Zfp106/Mapk14/Pik3r1/Ptprj/Bcar3/Rps6kb1/Xbp1/Ogt/C2cd5/Myo1c/Pip4k2a/Pten/Prkcd/Sesn3/Prkcb/Mzb1/Marcks/Grk2/Phip/Zfp36l1	GO Biological Process
CD8+ memory T	GO:0045834	positive regulation of lipid metabolic process	47	-0.526658	-2.02484	0.000339707	0.0198355	0.0187518	879	tags=40%, list=13%, signal=35%	Elovl5/Creb1/Crebl2/Chp1/Lpgat1/Cd81/Akt2/Tgfb1/Srebf2/Acsl5/Ptk2b/Igf1r/Abcg1/Prkcd/Lyn/Zbtb20/Cd19/Scd1/Cd74	GO Biological Process
CD8+ memory T	GO:0032356	oxidized DNA binding	7	0.918811	1.67925	0.000748814	0.0206227	0.0185978	18	tags=14%, list=0%, signal=14%	Rps3	GO Molecular Function
CD8+ memory T	GO:0019865	immunoglobulin binding	8	-0.846918	-1.9621	0.000776631	0.020826	0.0187811	238	tags=62%, list=4%, signal=60%	Fcgr2b/Cd4/Fcer2a/Jchain/Ms4a1	GO Molecular Function
CD8+ memory T	GO:0007005	mitochondrion organization	304	0.502296	1.37533	0.000380504	0.0215705	0.020392	1812	tags=44%, list=27%, signal=34%	Park7/Micos13/Tspo/Bcl2/Dnajc15/Slc25a4/Cox7a2/Atp5d/Ndufa1/Pycard/Ndufb11/Ndufa3/Tomm7/Ndufb4/Chchd2/Slc25a5/Ndufa12/Ndufb5/Bax/Gabarapl2/Ndufa11/Cox7a2l/Ndufs4/Ndufb9/Map1lc3b/Vdac2/Ndufb8/Prelid1/Ndufc2/Ndufa5/Tomm20/Tomm22/Gimap5/Ndufa8/Fis1/Hsd17b10/Fundc2/Ndufa2/Cdc37/Timm23/Ndufs5/Phb2/Ndufb10/Ndufb7/Ndufb2/Higd1a/Timm13/Pam16/Pet100/Ndufs7/Ndufa6/Atpif1/Ndufc1/Slirp/Dnajc19/Ndufs8/Ndufb6/…	GO Biological Process
CD8+ memory T	GO:0019825	oxygen binding	7	0.914923	1.67214	0.000996242	0.0253793	0.0228874	123	tags=43%, list=2%, signal=42%	Hba-a1/Hbb-bt/Park7	GO Molecular Function
CD8+ memory T	GO:0003955	NAD(P)H dehydrogenase (quinone) activity	14	0.816511	1.69185	0.00125946	0.0278998	0.0251604	1060	tags=86%, list=16%, signal=72%	Ndufa7/Ndufs4/Ndufb8/Ndufc2/Ndufv2/Ndufa2/Ndufb7/Ndufs7/Ndufs8/Ndufs3/Ndufa10/Ndufv1	GO Molecular Function
CD8+ memory T	GO:0008137	NADH dehydrogenase (ubiquinone) activity	14	0.816511	1.69185	0.00125946	0.0278998	0.0251604	1060	tags=86%, list=16%, signal=72%	Ndufa7/Ndufs4/Ndufb8/Ndufc2/Ndufv2/Ndufa2/Ndufb7/Ndufs7/Ndufs8/Ndufs3/Ndufa10/Ndufv1	GO Molecular Function
CD8+ memory T	GO:0050136	NADH dehydrogenase (quinone) activity	14	0.816511	1.69185	0.00125946	0.0278998	0.0251604	1060	tags=86%, list=16%, signal=72%	Ndufa7/Ndufs4/Ndufb8/Ndufc2/Ndufv2/Ndufa2/Ndufb7/Ndufs7/Ndufs8/Ndufs3/Ndufa10/Ndufv1	GO Molecular Function
CD8+ memory T	GO:0016441	post-transcriptional gene silencing	51	-0.506038	-2.02528	0.000518302	0.0288225	0.0272479	659	tags=33%, list=10%, signal=30%	Tgfb1/Ncbp3/Ago2/Helz/Gigyf2/Stat3/Tial1/Marf1/Limd1/Elavl1/Dicer1/Celf1/Celf2/Zfp36/Pum2/Ppp3ca/Nfkb1	GO Biological Process
CD8+ memory T	GO:1990247	N6-methyladenosine-containing RNA binding	7	-0.86035	-1.90079	0.00146182	0.0306479	0.0276387	935	tags=100%, list=14%, signal=86%	Ythdf3/Ythdc2/Hnrnpc/Hnrnpa2b1/Ythdf1/Ythdc1	GO Molecular Function
CD8+ memory T	GO:0043588	skin development	80	-0.410897	-1.76664	0.000564242	0.0310812	0.0293832	368	tags=20%, list=6%, signal=19%	Runx1/Notch1/Sgpp1/Ptges3/Numa1/Ctnnb1/Ldb1/Cbx7/Dicer1/Srsf6/Zfp36/Pum2/Ppp3ca/Psap/Zfp36l1/Scd1	GO Biological Process
CD8+ memory T	GO:0106222	lncRNA binding	13	-0.737391	-2.00948	0.00159653	0.0325372	0.0293425	207	tags=54%, list=3%, signal=52%	Atp2a2/Suz12/Elavl1/Celf1/Celf2/Pum2/Ddx17	GO Molecular Function
CD8+ memory T	GO:0010837	regulation of keratinocyte proliferation	12	-0.78372	-2.09221	0.00061467	0.033232	0.0314164	271	tags=58%, list=4%, signal=56%	Notch2/Bcl11b/Ptch1/Nfatc1/Srsf6/Zfp36/Zfp36l1	GO Biological Process
CD8+ memory T	GO:0003954	NADH dehydrogenase activity	15	0.817924	1.72418	0.00168647	0.0336962	0.0303877	1060	tags=87%, list=16%, signal=73%	Ndufa7/Ndufs4/Ndufb8/Ndufc2/Ndufv2/Ndufa2/Ndufb7/Ndufs7/Ndufs8/Ndufs3/Ndufa9/Ndufa10/Ndufv1	GO Molecular Function
CD8+ memory T	mmu04657	IL-17 signaling pathway - Mus musculus (house mouse)	42	-0.49443	-1.74253	0.00270107	0.035339	0.0317494	701	tags=29%, list=11%, signal=26%	Usp25/Rela/Hsp90b1/Mapk14/Srsf1/Tab2/Elavl1/Lcn2/Nfkb1/S100a9/S100a8/Hsp90aa1	Kegg Pathway
CD8+ memory T	GO:0006909	phagocytosis	112	-0.360478	-1.62015	0.000769277	0.0394018	0.0372492	455	tags=26%, list=7%, signal=25%	Slamf1/Myo18a/Pik3ca/Rhobtb2/Ptprj/Arhgap25/Abca1/Vav1/Rab14/Pikfyve/Plcg2/Stap1/Csk/Fcgr2b/Hspa8/Pten/Ncf2/Pld4/Itgal/Ighg2b/Sod1/Iglc3/Syk/Igha/Iglc2/Irf8/Ighd/Igkc/Ighm	GO Biological Process
CD8+ memory T	GO:0140694	non-membrane-bounded organelle assembly	195	0.523206	1.41976	0.000764765	0.0394018	0.0372492	763	tags=19%, list=11%, signal=17%	Rplp0/Rpl10/Rps3/Rps2/Rpl11/Rpl24/Rps5/Rpl6/Rps23/Rpsa/Rps27/Rps25/Rps19/Rpl38/Rps14/Rps28/Rpl5/Chmp4b/Npm1/Cirbp/Lsm4/Itgb1/Arpc2/Bin2/Eif6/Rhoa/Tpr/Cenpx/Chmp2a/Mrpl20/Rnf213/Nop53/C1qbp/Prrc2c/Tubb5/Rpl23a/Msn	GO Biological Process
CD8+ memory T	GO:0048821	erythrocyte development	22	0.764709	1.73701	0.00078941	0.0397359	0.037565	259	tags=18%, list=4%, signal=18%	Hba-a1/Hba-a2/Rps6/Klf2	GO Biological Process
CD8+ memory T	GO:0005161	platelet-derived growth factor receptor binding	5	-0.905631	-1.79361	0.00213828	0.041902	0.0377877	463	tags=80%, list=7%, signal=74%	Pik3r1/Ptprj/Pten/Lyn	GO Molecular Function
CD8+ memory T	GO:0071901	negative regulation of protein serine/threonine kinase activity	50	-0.490119	-1.96413	0.000877418	0.0430525	0.0407004	919	tags=42%, list=14%, signal=36%	Pkib/Rb1/Sorl1/Lrp6/Hipk3/Hexim1/Smpd1/Heg1/Kat2b/Nup62/Ptprj/Rgs14/Sh2b3/Pkig/Hhex/Pten/Prkcd/Ptpn6/Lyn/Chordc1/Dnaja1	GO Biological Process
CD8+ memory T	GO:0006911	phagocytosis, engulfment	37	-0.531629	-1.95868	0.000869035	0.0430525	0.0407004	438	tags=35%, list=7%, signal=33%	Arhgap25/Abca1/Plcg2/Stap1/Fcgr2b/Pten/Ighg2b/Iglc3/Igha/Iglc2/Ighd/Igkc/Ighm	GO Biological Process
CD8+ memory T	mmu05145	Toxoplasmosis - Mus musculus (house mouse)	63	-0.399434	-1.54409	0.00346977	0.0435803	0.0391536	706	tags=35%, list=11%, signal=31%	Akt2/H2-Eb2/Rela/Tgfb1/Irgm2/Irak1/Mapk14/H2-Oa/Birc3/Stat3/Il10ra/H2-Eb1/Tab2/Hspa8/H2-DMb1/H2-Ob/Xiap/Ciita/H2-DMb2/H2-Ab1/Nfkb1/H2-Aa	Kegg Pathway
CD8+ memory T	GO:0004553	hydrolase activity, hydrolyzing O-glycosyl compounds	26	-0.566544	-1.95271	0.00229945	0.0442102	0.0398693	1835	tags=62%, list=28%, signal=45%	Gusb/Parg/Mogs/Neu1/Ganab/Man1b1/Edem3/Hexa/Manba/Hexb/Manea/Man2b1/Man2a1/Man1a/Edem1/Chil3	GO Molecular Function
CD8+ memory T	GO:0099024	plasma membrane invagination	42	-0.505993	-1.9383	0.000912041	0.0443784	0.0419539	438	tags=33%, list=7%, signal=31%	Arhgap25/Snx18/Abca1/Plcg2/Stap1/Fcgr2b/Pten/Ighg2b/Iglc3/Igha/Iglc2/Ighd/Igkc/Ighm	GO Biological Process
CD8+ memory T	GO:0018108	peptidyl-tyrosine phosphorylation	118	-0.341204	-1.47275	0.000957501	0.0455796	0.0430895	762	tags=25%, list=11%, signal=23%	Hcls1/Cd81/Dyrk1a/Aplp2/Zfp592/Tgfb1/Ptk2b/Dyrk2/Igf1r/Clcf1/Nrp1/Nedd9/Abi1/Ptprj/Sh2b3/Plcg2/Socs4/Cbl/Btk/Prkcd/Cd4/Sh3bp5/Cd24a/Ptpn6/Lyn/Blk/Syk/Bank1/Cd74/Ighm	GO Biological Process
CD8+ memory T	GO:1901135	carbohydrate derivative metabolic process	408	0.471116	1.29583	0.000966438	0.0455796	0.0430895	986	tags=22%, list=15%, signal=20%	Nme2/Gapdh/Atp5g1/Atp5g2/Atp5j2/Ndufa13/Tspo/Bcl2/Eno1/Dad1/Itm2b/Ndufa7/Krtcap2/Atp5e/Hint1/Atp5b/Atp5h/Atp5d/Atp5j/Atp5c1/Nt5c/Ndufv3/Ost4/Ndufa1/Ndufb11/Ndufa3/Ndufb4/Atp5o/Ndufa12/Ndufb5/Bax/Nme1/Dpm3/Ndufa11/Atp5l/Ccnd3/Pgls/Ndufs4/Ndufb9/Aldoa/Sdhb/Atp5k/Ndufb8/Tmem258/Ndufc2/Ndufa5/Ndufa8/Ndufv2/Eif6/Fis1/Tmem59/Ndufa2/Dpm1/Mpc2/Rhoa/Ndufs5/Ndufb10/Ran/Ndufb7/Ndufb2/Dguok/Aprt/Pkm/Ndufs7/M…	GO Biological Process
CD8+ memory T	GO:0061077	chaperone-mediated protein folding	45	-0.476812	-1.80836	0.00102199	0.0473604	0.044773	242	tags=18%, list=4%, signal=17%	Ptges3/Hspa8/H2-DMb1/H2-DMb2/Chordc1/Dnajb1/Cd74/Hsph1	GO Biological Process
CD8+ memory T	GO:0051438	regulation of ubiquitin-protein transferase activity	31	0.71192	1.70862	0.00106106	0.0484027	0.0457583	172	tags=19%, list=3%, signal=19%	Rps7/Rps2/Rpl11/Rpl23/Park7/Rpl5	GO Biological Process
CD8+ memory T	mmu05321	Inflammatory bowel disease - Mus musculus (house mouse)	30	-0.513213	-1.68182	0.00410572	0.0495845	0.0445479	760	tags=53%, list=12%, signal=47%	Stat6/H2-Eb2/Rela/Tgfb1/Gata3/H2-Oa/Stat3/Maf/H2-Eb1/Nfatc1/H2-DMb1/H2-Ob/H2-DMb2/H2-Ab1/Nfkb1/H2-Aa	Kegg Pathway

## Sheet: Dendritic_pathway
ClusterID	ID	Description	setSize	enrichmentScore	NES	pvalue	p.adjust	qvalue	rank	leading_edge	core_enrichment	PathwayDB
Dendritic	mmu05171	Coronavirus disease - COVID-19 - Mus musculus (house mouse)	139	0.835243	2.06569	1e-10	2.47692e-09	2.02429e-09	656	tags=62%, list=9%, signal=57%	Rpl10/Rps18/Rplp0/Uba52/Rpl15/Rpl32/Rpl28/Rps11/Rpl34/Rpl21/Rps15a/Rps7/Rpl14/Rps3/Rpl11/Rps2/Rpl36/Rpl9/Rps5/Rpl10a/Rps4x/Rpl26/Rpl39/Rpl24/Rpl13/Rpl19/Rpl3/Rpl8/Rpl35/Rpsa/Rps20/Fau/Rpl36al/Rpl27a/Rpl6/Rpl37/Rpl12/Rps10/Rps23/Rps29/Rps13/Rpl17/Rpl18a/Rpl31/Rps16/Rpl18/Rpl23/Rps27a/Rps24/Rps28/Rpl30/Rps3a1/Rps25/Rpl22l1/Rpl7a/Rps14/Rpl7/Rps19/Rpl13a/Rplp1/Rps8/Rps21/Rps27/Rpl27/Rpl36a/Rpl35a/Rpl…	Kegg Pathway
Dendritic	mmu03010	Ribosome - Mus musculus (house mouse)	126	0.820299	2.02177	1e-10	2.47692e-09	2.02429e-09	559	tags=68%, list=8%, signal=64%	Rpl10/Rps18/Rplp0/Uba52/Rpl15/Rpl32/Rpl28/Rps11/Rpl34/Rpl21/Rps15a/Rps7/Rpl14/Rps3/Rpl11/Rps2/Rpl36/Rpl9/Rps5/Rpl10a/Rps4x/Rpl26/Rpl39/Rpl24/Rpl13/Rpl19/Rpl3/Rpl8/Rpl35/Rpsa/Rps20/Fau/Rpl36al/Rpl27a/Rpl6/Rpl37/Rpl12/Rps10/Rps23/Rps29/Rps13/Rpl17/Rpl18a/Rpl31/Rps16/Rpl18/Rpl23/Rps27a/Rps24/Rps28/Rpl30/Rps3a1/Rps25/Rpl22l1/Rpl7a/Rps14/Rpl7/Rps19/Rpl13a/Rplp1/Rps8/Rps21/Rps27/Rpl27/Rpl36a/Rpl35a/Rpl…	Kegg Pathway
Dendritic	mmu00190	Oxidative phosphorylation - Mus musculus (house mouse)	96	0.796738	1.94556	1e-10	2.47692e-09	2.02429e-09	1141	tags=81%, list=16%, signal=69%	Cox8a/Atp5g1/Uqcrb/Cox7c/Cox6c/Cox5b/Atp6v0e/Ndufa13/Cox7b/Atp5c1/Atp5e/Cox5a/Atp5g2/Cox7a2/Atp5j2/Atp5d/Cox6b1/Cycs/Ndufa7/Atp5l/Atp6v1g1/Atp6v0c/Atp5j/Atp5b/Ndufa4/Cox4i1/Uqcr10/Ndufb8/Atp6v1f/Ndufb7/Ndufa3/Atp5h/Ndufs4/Cox6a2/Ndufb9/Ndufb11/Ndufc2/Ndufb5/Cox7a2l/Atp5o/Atp5k/Ndufv2/Sdhb/Uqcrq/Ndufs5/Uqcr11/Atp6v0b/Ndufa1/Ndufa2/Ndufv3/Ndufa11/Ndufa12/Ndufc1/Ndufb3/Ndufs8/Ndufa5/Ndufa6/Cox17/Ndu…	Kegg Pathway
Dendritic	mmu05012	Parkinson disease - Mus musculus (house mouse)	187	0.741508	1.85173	1e-10	2.47692e-09	2.02429e-09	1180	tags=64%, list=16%, signal=55%	Ubb/Uba52/Cox8a/Calm1/Atp5g1/Txn1/Uqcrb/Cox7c/Cox6c/Cox5b/Ndufa13/Cox7b/Rps27a/Atp5c1/Atp5e/Cox5a/Atp5g2/Cox7a2/Atp5d/Cox6b1/Psma3/Cycs/Ndufa7/Slc25a4/Vdac2/Atp5j/Psmb2/Atp5b/Park7/Ndufa4/Psmb1/Psma2/Cox4i1/Uqcr10/Ndufb8/Ndufb7/Psma7/Ndufa3/Psma4/Psmb5/Atp5h/Ndufs4/Cox6a2/Bax/Ndufb9/Psma5/Sem1/Ndufb11/Gnai2/Psmb3/Ndufc2/Ndufb5/Gnas/Hspa5/Psmb6/Cox7a2l/Atp5o/Psmd8/Slc25a5/Ndufv2/Sdhb/Uqcrq/Ube2l3/…	Kegg Pathway
Dendritic	mmu05020	Prion disease - Mus musculus (house mouse)	180	0.73694	1.83865	1e-10	2.47692e-09	2.02429e-09	1296	tags=66%, list=18%, signal=55%	Cyba/Cox8a/Atp5g1/Uqcrb/Cox7c/Cox6c/Cox5b/Ndufa13/Cox7b/Atp5c1/Atp5e/Cox5a/Atp5g2/Cox7a2/Atp5d/Cox6b1/Psma3/Cycs/Ndufa7/Slc25a4/Vdac2/Atp5j/Psmb2/Atp5b/Ndufa4/Psmb1/Psma2/Cox4i1/Uqcr10/Ndufb8/Ndufb7/Psma7/Ndufa3/Psma4/Psmb5/Atp5h/Ndufs4/Cox6a2/Bax/Ndufb9/Psma5/Sem1/Ndufb11/Psmb3/Ndufc2/Ndufb5/Hspa5/Psmb6/Cox7a2l/Ccl5/Atp5o/Psmd8/Slc25a5/Ndufv2/Sdhb/Uqcrq/Ndufs5/Uqcr11/Ndufa1/Ndufa2/Ndufv3/Ndufa11…	Kegg Pathway
Dendritic	mmu05415	Diabetic cardiomyopathy - Mus musculus (house mouse)	133	0.728257	1.79718	1e-10	2.47692e-09	2.02429e-09	1141	tags=60%, list=16%, signal=52%	Cyba/Cox8a/Atp5g1/Gapdh/Uqcrb/Cox7c/Cox6c/Cox5b/Ndufa13/Cox7b/Atp5c1/Atp5e/Cox5a/Atp5g2/Cox7a2/Atp5d/Cox6b1/Ndufa7/Slc25a4/Vdac2/Atp5j/Atp5b/Ndufa4/Cox4i1/Uqcr10/Ndufb8/Mpc2/Ndufb7/Ndufa3/Atp5h/Ndufs4/Cox6a2/Ndufb9/Ndufb11/Ndufc2/Ndufb5/Cox7a2l/Atp5o/Mpc1/Slc25a5/Ndufv2/Sdhb/Uqcrq/Ndufs5/Uqcr11/Ndufa1/Ndufa2/Ndufv3/Ndufa11/Ndufa12/Rac1/Ndufc1/Ndufb3/Ndufs8/Ndufa5/Ndufa6/Cybb/Rac2/Ndufb4/Ndufb2/Uq…	Kegg Pathway
Dendritic	mmu05208	Chemical carcinogenesis - reactive oxygen species - Mus musculus (house mouse)	145	0.719618	1.78346	1e-10	2.47692e-09	2.02429e-09	1141	tags=55%, list=16%, signal=47%	Cyba/Cox8a/Atp5g1/Uqcrb/Cox7c/Cox6c/Cox5b/Ndufa13/Cox7b/Atp5c1/Atp5e/Cox5a/Atp5g2/Cox7a2/Atp5d/Cox6b1/Ndufa7/Slc25a4/Vdac2/Atp5j/Atp5b/Ndufa4/Cox4i1/Uqcr10/Ndufb8/Ndufb7/Ndufa3/Atp5h/Ndufs4/Cox6a2/Ndufb9/Ndufb11/Akr1a1/Fos/Ndufc2/Ndufb5/Cox7a2l/Atp5o/Slc25a5/Ndufv2/Sdhb/Uqcrq/Ndufs5/Uqcr11/Ndufa1/Ndufa2/Ndufv3/Ndufa11/Ndufa12/Rac1/Ndufc1/Ndufb3/Ndufs8/Ndufa5/Ndufa6/Ndufb4/Ndufb2/Jun/Uqcrfs1/Atp5g…	Kegg Pathway
Dendritic	mmu04932	Non-alcoholic fatty liver disease - Mus musculus (house mouse)	115	0.719656	1.76653	1e-10	2.47692e-09	2.02429e-09	1141	tags=54%, list=16%, signal=46%	Cox8a/Uqcrb/Cox7c/Cox6c/Cox5b/Ndufa13/Cox7b/Cox5a/Cox7a2/Cox6b1/Cycs/Ndufa7/Ndufa4/Cox4i1/Uqcr10/Ndufb8/Ndufb7/Ndufa3/Ndufs4/Cox6a2/Bax/Ndufb9/Ndufb11/Fos/Ndufc2/Ndufb5/Cox7a2l/Ndufv2/Sdhb/Uqcrq/Ndufs5/Uqcr11/Ndufa1/Ndufa2/Ndufv3/Ndufa11/Ndufa12/Rac1/Ndufc1/Cdc42/Ndufb3/Ndufs8/Ndufa5/Ndufa6/Ndufb4/Ndufb2/Jun/Uqcrfs1/Uqcrh/Ndufa8/Ndufab1/Cox6a1/Cyc1/Ndufb10/Ndufs3/Sdhd/Uqcrc1/Eif2s1/Ndufs6/Uqcrc2/…	Kegg Pathway
Dendritic	mmu04714	Thermogenesis - Mus musculus (house mouse)	148	0.702869	1.74535	1e-10	2.47692e-09	2.02429e-09	1145	tags=54%, list=16%, signal=46%	Cox8a/Atp5g1/Uqcrb/Cox7c/Cox6c/Cox5b/Ndufa13/Cox7b/Atp5c1/Atp5e/Cox5a/Actb/Atp5g2/Cox7a2/Atp5j2/Atp5d/Cox6b1/Ndufa7/Atp5l/Atp5j/Atp5b/Ndufa4/Cox4i1/Uqcr10/Ndufb8/Rps6/Ndufb7/Ndufa3/Atp5h/Ndufs4/Cox6a2/Ndufb9/Actg1/Ndufb11/Ndufc2/Ndufb5/Gnas/Cox7a2l/Atp5o/Atp5k/Ndufv2/Sdhb/Uqcrq/Ndufs5/Uqcr11/Ndufa1/Ndufa2/Ndufv3/Ndufa11/Ndufa12/Ndufc1/Rheb/Ndufb3/Ndufs8/Ndufa5/Ndufa6/Cox17/Ndufb4/Ndufb2/Uqcrfs1/A…	Kegg Pathway
Dendritic	mmu05016	Huntington disease - Mus musculus (house mouse)	208	0.691961	1.73432	1e-10	2.47692e-09	2.02429e-09	1296	tags=58%, list=18%, signal=49%	Cox8a/Atp5g1/Uqcrb/Clta/Cox7c/Cox6c/Cox5b/Ndufa13/Cox7b/Atp5c1/Atp5e/Cox5a/Atp5g2/Cox7a2/Atp5d/Cox6b1/Psma3/Cycs/Ndufa7/Slc25a4/Vdac2/Atp5j/Psmb2/Atp5b/Ndufa4/Psmb1/Psma2/Cox4i1/Uqcr10/Ndufb8/Ndufb7/Psma7/Ndufa3/Psma4/Psmb5/Atp5h/Ndufs4/Cox6a2/Bax/Ndufb9/Psma5/Sem1/Ndufb11/Psmb3/Ndufc2/Ndufb5/Psmb6/Cox7a2l/Atp5o/Psmd8/Slc25a5/Ndufv2/Sdhb/Uqcrq/Ndufs5/Uqcr11/Ndufa1/Ndufa2/Ndufv3/Gpx1/Ndufa11/Tubb5…	Kegg Pathway
Dendritic	mmu05014	Amyotrophic lateral sclerosis - Mus musculus (house mouse)	243	0.669731	1.68631	1e-10	2.47692e-09	2.02429e-09	1180	tags=49%, list=16%, signal=42%	Cox8a/Pfn1/Atp5g1/Uqcrb/Cox7c/Cox6c/Cox5b/Ndufa13/Cox7b/Atp5c1/Atp5e/Cox5a/Actb/Atp5g2/Cox7a2/Atp5d/Cox6b1/Psma3/Cycs/Ndufa7/Atp5j/Psmb2/Atp5b/Ndufa4/Psmb1/Psma2/Cox4i1/Uqcr10/Ndufb8/Ndufb7/Psma7/Ndufa3/Psma4/Psmb5/Atp5h/Hnrnpa1/Ndufs4/Cox6a2/Bax/Ndufb9/Psma5/Actg1/Sem1/Ndufb11/Psmb3/Ndufc2/Ndufb5/Hspa5/Psmb6/Cox7a2l/Atp5o/Psmd8/Ndufv2/Sdhb/Uqcrq/Ndufs5/Uqcr11/Ndufa1/Ndufa2/Ndufv3/Gpx1/Ndufa11/Tu…	Kegg Pathway
Dendritic	mmu05010	Alzheimer disease - Mus musculus (house mouse)	242	0.661312	1.66449	1e-10	2.47692e-09	2.02429e-09	1434	tags=52%, list=20%, signal=43%	Cox8a/Calm1/Atp5g1/Gapdh/Uqcrb/Cox7c/Cox6c/Cox5b/Ndufa13/Cox7b/Atp5c1/Atp5e/Cox5a/Atp5g2/Cox7a2/Atp5d/Cox6b1/Psma3/Cycs/Ndufa7/Slc25a4/Vdac2/Atp5j/Psmb2/Atp5b/Ndufa4/Psmb1/Psma2/Cox4i1/Uqcr10/Ndufb8/Ndufb7/Psma7/Ndufa3/Psma4/Psmb5/Atp5h/Ndufs4/Cox6a2/Ndufb9/Psma5/Sem1/Ndufb11/Psmb3/Ndufc2/Ndufb5/Psmb6/Cox7a2l/Atp5o/Psmd8/Slc25a5/Ndufv2/Sdhb/Uqcrq/Ndufs5/Uqcr11/Ndufa1/Ndufa2/Ndufv3/Ndufa11/Tubb5/P…	Kegg Pathway
Dendritic	mmu05022	Pathways of neurodegeneration - multiple diseases - Mus musculus (house mouse)	287	0.639136	1.61539	1e-10	2.47692e-09	2.02429e-09	1296	tags=45%, list=18%, signal=39%	Ubb/Uba52/Cox8a/Calm1/Atp5g1/Uqcrb/Cox7c/Cox6c/Cox5b/Ndufa13/Cox7b/Rps27a/Atp5c1/Atp5e/Cox5a/Atp5g2/Cox7a2/Atp5d/Cox6b1/Psma3/Cycs/Ndufa7/Slc25a4/Vdac2/Atp5j/Psmb2/Atp5b/Park7/Ndufa4/Psmb1/Psma2/Cox4i1/Uqcr10/Ndufb8/Ndufb7/Psma7/Ndufa3/Psma4/Psmb5/Atp5h/Ndufs4/Cox6a2/Bax/Ndufb9/Psma5/Sem1/Ndufb11/Psmb3/Ndufc2/Ndufb5/Hspa5/Psmb6/Cox7a2l/Atp5o/Psmd8/Slc25a5/Ndufv2/Sdhb/Uqcrq/Ube2l3/Ndufs5/Uqcr11/Ub…	Kegg Pathway
Dendritic	mmu04145	Phagosome - Mus musculus (house mouse)	93	0.671982	1.63831	8.98827e-10	2.0673e-08	1.68952e-08	1012	tags=47%, list=14%, signal=41%	H2-Eb1/H2-Ab1/Sec61g/H2-Aa/Cyba/H2-DMb1/H2-D1/H2-DMa/Atp6v0e/Actb/H2-T23/Sec61b/H2-M2/Ctss/Atp6v1g1/Atp6v0c/Ctsl/Cd209d/Atp6v1f/Actg1/Itgb1/Calr/Atp6v0b/Tubb5/Rac1/Tap1/Tubb2a/Lamp1/H2-DMb2/Cybb/Coro1a/H2-Oa/Rab7b/H2-M3/M6pr/Atp6v1d/Tuba1c/Tuba1a/Tubb4b/H2-K1/Stx7/Rab7/Itgb2/Tuba1b	Kegg Pathway
Dendritic	GO:0002181	cytoplasmic translation	127	0.837122	2.07271	1e-10	2.61208e-08	2.44737e-08	666	tags=68%, list=9%, signal=63%	Rps18/Rplp0/Uba52/Rpl15/Rpl32/Rpl28/Rps11/Rpl34/Rpl21/Rps15a/Rps7/Rpl14/Rps3/Rpl11/Rps2/Rpl36/Rpl9/Rps5/Rpl10a/Rps4x/Rpl26/Rpl39/Rpl24/Rpl13/Rpl19/Rpl3/Rpl8/Rpsa/Rps20/Fau/Rpl27a/Rpl6/Rpl12/Rps10/Rps23/Rps29/Rps13/Rpl17/Rpl18a/Rpl31/Rps16/Rpl18/Rpl23/Rps27a/Rps24/Rps28/Rpl30/Rps3a1/Rps25/Rpl22l1/Rpl7a/Rps14/Rpl7/Rps19/Ybx1/Rpl13a/Rplp1/Rps8/Rps21/Rpl27/Rpl36a/Rpl35a/Rpl38/Rps17/Rpl22/Eif4a1/Rps6/…	GO Biological Process
Dendritic	GO:0015986	proton motive force-driven ATP synthesis	57	0.783162	1.87049	1e-10	2.61208e-08	2.44737e-08	1162	tags=82%, list=16%, signal=70%	Atp5g1/Ndufa13/Atp5c1/Atp5e/Atp5g2/Atp5j2/Atp5d/Ndufa7/Atp5l/Atp5j/Atp5b/Ndufb8/Ndufb7/Ndufa3/Atp5h/Ndufs4/Ndufb9/Ndufb11/Ndufc2/Ndufb5/Atp5o/Atp5k/Ndufv2/Sdhb/Ndufs5/Ndufa1/Ndufa2/Ndufv3/Ndufa11/Ndufa12/Ndufc1/Ndufb3/Ndufs8/Ndufa5/Ndufa6/Ndufb4/Ndufb2/Atp5g3/Ndufa8/Ndufab1/Ndufb10/Atp5a1/Ndufs3/Sdhd/Ndufs6/Ndufs7/Ndufa9	GO Biological Process
Dendritic	GO:0042776	proton motive force-driven mitochondrial ATP synthesis	53	0.775273	1.84523	1e-10	2.61208e-08	2.44737e-08	1162	tags=81%, list=16%, signal=69%	Ndufa13/Atp5c1/Atp5e/Atp5j2/Atp5d/Ndufa7/Atp5j/Atp5b/Ndufb8/Ndufb7/Ndufa3/Atp5h/Ndufs4/Ndufb9/Ndufb11/Ndufc2/Ndufb5/Atp5o/Atp5k/Ndufv2/Sdhb/Ndufs5/Ndufa1/Ndufa2/Ndufv3/Ndufa11/Ndufa12/Ndufc1/Ndufb3/Ndufs8/Ndufa5/Ndufa6/Ndufb4/Ndufb2/Ndufa8/Ndufab1/Ndufb10/Atp5a1/Ndufs3/Sdhd/Ndufs6/Ndufs7/Ndufa9	GO Biological Process
Dendritic	GO:0006119	oxidative phosphorylation	97	0.751334	1.84119	1e-10	2.61208e-08	2.44737e-08	1162	tags=70%, list=16%, signal=60%	Uqcrb/Cox7c/Cox5b/Ndufa13/Atp5c1/Atp5e/Cox5a/Cox7a2/Atp5j2/Atp5d/Chchd2/Cycs/Ndufa7/Atp5j/Atp5b/Park7/Cox4i1/Uqcr10/Ndufb8/Ndufb7/Ndufa3/Atp5h/Ndufs4/Cox6a2/Ndufb9/Rhoa/Ndufb11/Iscu/Ndufc2/Ndufb5/Cox7a2l/Atp5o/Atp5k/Ndufv2/Sdhb/Uqcrq/Ndufs5/Uqcr11/Ndufa1/Ndufa2/Ndufv3/Ndufa11/Ndufa12/Ndufc1/Ndufb3/Ndufs8/Ndufa5/Ndufa6/Ndufb4/Ndufb2/Uqcrfs1/Uqcc2/Uqcrh/Ndufa8/Ndufab1/Cox6a1/Dnajc15/Cyc1/Ndufb10/At…	GO Biological Process
Dendritic	GO:0009206	purine ribonucleoside triphosphate biosynthetic process	78	0.750232	1.82249	1e-10	2.61208e-08	2.44737e-08	1427	tags=78%, list=20%, signal=64%	Nme2/Atp5g1/Ndufa13/Atp5c1/Atp5e/Atp5g2/Atp5j2/Atp5d/Ndufa7/Atp5l/Atp5j/Atp5b/Ndufb8/Ndufb7/Ndufa3/Atp5h/Ndufs4/Ndufb9/Ndufb11/Aldoa/Ndufc2/Ndufb5/Eno1/Atp5o/Atp5k/Ndufv2/Sdhb/Ndufs5/Ndufa1/Ndufa2/Ndufv3/Ndufa11/Ndufa12/Ndufc1/Ndufb3/Ndufs8/Pkm/Ndufa5/Ndufa6/Nme1/Ndufb4/Ndufb2/Atp5g3/Ndufa8/Pnp/Ndufab1/Ndufb10/Atp5a1/Ndufs3/Pid1/Sdhd/Ndufs6/Vcp/Ndufs7/Ndufa9/Ndufb6/Dguok/Tgfb1/Ndufa10/Ndufs2/Uqcc3	GO Biological Process
Dendritic	GO:0006754	ATP biosynthetic process	74	0.751351	1.81953	1e-10	2.61208e-08	2.44737e-08	1427	tags=78%, list=20%, signal=64%	Atp5g1/Ndufa13/Atp5c1/Atp5e/Atp5g2/Atp5j2/Atp5d/Ndufa7/Atp5l/Atp5j/Atp5b/Ndufb8/Ndufb7/Ndufa3/Atp5h/Ndufs4/Ndufb9/Ndufb11/Aldoa/Ndufc2/Ndufb5/Eno1/Atp5o/Atp5k/Ndufv2/Sdhb/Ndufs5/Ndufa1/Ndufa2/Ndufv3/Ndufa11/Ndufa12/Ndufc1/Ndufb3/Ndufs8/Pkm/Ndufa5/Ndufa6/Ndufb4/Ndufb2/Atp5g3/Ndufa8/Ndufab1/Ndufb10/Atp5a1/Ndufs3/Pid1/Sdhd/Ndufs6/Vcp/Ndufs7/Ndufa9/Ndufb6/Dguok/Tgfb1/Ndufa10/Ndufs2/Uqcc3	GO Biological Process
Dendritic	GO:0009201	ribonucleoside triphosphate biosynthetic process	79	0.747804	1.81778	1e-10	2.61208e-08	2.44737e-08	1427	tags=77%, list=20%, signal=63%	Nme2/Atp5g1/Ndufa13/Atp5c1/Atp5e/Atp5g2/Atp5j2/Atp5d/Ndufa7/Atp5l/Atp5j/Atp5b/Ndufb8/Ndufb7/Ndufa3/Atp5h/Ndufs4/Ndufb9/Ndufb11/Aldoa/Ndufc2/Ndufb5/Eno1/Atp5o/Atp5k/Ndufv2/Sdhb/Ndufs5/Ndufa1/Ndufa2/Ndufv3/Ndufa11/Ndufa12/Ndufc1/Ndufb3/Ndufs8/Pkm/Ndufa5/Ndufa6/Nme1/Ndufb4/Ndufb2/Atp5g3/Ndufa8/Pnp/Ndufab1/Ndufb10/Atp5a1/Ndufs3/Pid1/Sdhd/Ndufs6/Vcp/Ndufs7/Ndufa9/Ndufb6/Dguok/Tgfb1/Ndufa10/Ndufs2/Uqcc3	GO Biological Process
Dendritic	GO:0009145	purine nucleoside triphosphate biosynthetic process	79	0.74376	1.80795	1e-10	2.61208e-08	2.44737e-08	1427	tags=77%, list=20%, signal=63%	Nme2/Atp5g1/Ndufa13/Atp5c1/Atp5e/Atp5g2/Atp5j2/Atp5d/Ndufa7/Atp5l/Atp5j/Atp5b/Ndufb8/Ndufb7/Ndufa3/Atp5h/Ndufs4/Ndufb9/Ndufb11/Aldoa/Ndufc2/Ndufb5/Eno1/Atp5o/Atp5k/Ndufv2/Sdhb/Ndufs5/Ndufa1/Ndufa2/Ndufv3/Ndufa11/Ndufa12/Ndufc1/Ndufb3/Ndufs8/Pkm/Ndufa5/Ndufa6/Nme1/Ndufb4/Ndufb2/Atp5g3/Ndufa8/Pnp/Ndufab1/Ndufb10/Atp5a1/Ndufs3/Pid1/Sdhd/Ndufs6/Vcp/Ndufs7/Ndufa9/Ndufb6/Dguok/Tgfb1/Ndufa10/Ndufs2/Uqcc3	GO Biological Process
Dendritic	GO:0009142	nucleoside triphosphate biosynthetic process	83	0.734261	1.78765	1e-10	2.61208e-08	2.44737e-08	1427	tags=75%, list=20%, signal=61%	Nme2/Atp5g1/Ndufa13/Atp5c1/Atp5e/Atp5g2/Atp5j2/Atp5d/Ndufa7/Atp5l/Atp5j/Atp5b/Ndufb8/Ndufb7/Ndufa3/Atp5h/Ndufs4/Ndufb9/Ndufb11/Aldoa/Ndufc2/Ndufb5/Eno1/Atp5o/Atp5k/Ndufv2/Sdhb/Ndufs5/Ndufa1/Ndufa2/Ndufv3/Ndufa11/Ndufa12/Ndufc1/Ndufb3/Ndufs8/Pkm/Ndufa5/Ndufa6/Nme1/Ndufb4/Ndufb2/Atp5g3/Ndufa8/Pnp/Cmpk1/Ndufab1/Ndufb10/Atp5a1/Ndufs3/Pid1/Sdhd/Ndufs6/Vcp/Ndufs7/Ndufa9/Ndufb6/Dguok/Tgfb1/Ndufa10/Ndufs…	GO Biological Process
Dendritic	GO:0009060	aerobic respiration	131	0.683757	1.69238	1e-10	2.61208e-08	2.44737e-08	1455	tags=61%, list=20%, signal=50%	Uqcrb/Cox7c/Cox5b/Ndufa13/Atp5c1/Atp5e/Cox5a/Cox7a2/Atp5j2/Atp5d/Chchd2/Cycs/Ndufa7/Atp5j/Atp5b/Park7/Cox4i1/Uqcr10/Ndufb8/Ndufb7/Ndufa3/Atp5h/Ndufs4/Cox6a2/Ndufb9/Rhoa/Ndufb11/Iscu/Ndufc2/Ndufb5/Cox7a2l/Atp5o/Atp5k/Ndufv2/Sdhb/Uqcrq/Ndufs5/Uqcr11/Ndufa1/Ndufa2/Ndufv3/Ndufa11/Ndufa12/Ndufc1/Fh1/Ndufb3/Ndufs8/Ndufa5/Ndufa6/Ndufb4/Ndufb2/Uqcrfs1/Uqcc2/Uqcrh/Ndufa8/Bloc1s1/Mdh1/Ndufab1/Cox6a1/Dnajc1…	GO Biological Process
Dendritic	GO:0046034	ATP metabolic process	134	0.672199	1.66475	1e-10	2.61208e-08	2.44737e-08	1455	tags=54%, list=20%, signal=44%	Atp5g1/Gapdh/Atpif1/Tspo/Ndufa13/Atp5c1/Atp5e/Atp5g2/Atp5j2/Atp5d/Ndufa7/Atp5l/Atp5j/Atp5b/Ndufb8/Ndufb7/Ndufa3/Atp5h/Ndufs4/Ndufb9/Ndufb11/Aldoa/Ndufc2/Ndufb5/Eno1/Atp5o/Atp5k/Ndufv2/Sdhb/Ndufs5/Fis1/Ndufa1/Ndufa2/Ndufv3/Ndufa11/Ndufa12/Ndufc1/Atp1b1/Ndufb3/Ndufs8/Pkm/Ndufa5/Ndufa6/Eif6/Pgam1/Ndufb4/Ndufb2/Atp5g3/Ndufa8/Gpi1/Tpi1/Ndufab1/Ndufb10/Atp5a1/Ndufs3/Pgk1/Pid1/Sdhd/Ndufs6/Vcp/Ak2/Ndufs7…	GO Biological Process
Dendritic	GO:0009205	purine ribonucleoside triphosphate metabolic process	149	0.66673	1.65991	1e-10	2.61208e-08	2.44737e-08	1455	tags=52%, list=20%, signal=43%	Nme2/Atp5g1/Gapdh/Atpif1/Tspo/Ndufa13/Atp5c1/Atp5e/Atp5g2/Atp5j2/Atp5d/Ndufa7/Atp5l/Atp5j/Atp5b/Ndufb8/Ndufb7/Ndufa3/Atp5h/Ndufs4/Ndufb9/Rhoa/Ndufb11/Ran/Aldoa/Ndufc2/Ndufb5/Eno1/Atp5o/Atp5k/Ndufv2/Sdhb/Ndufs5/Fis1/Ndufa1/Ndufa2/Ndufv3/Ndufa11/Ndufa12/Ndufc1/Atp1b1/Ndufb3/Ndufs8/Pkm/Ndufa5/Ndufa6/Eif6/Pgam1/Nme1/Ndufb4/Ndufb2/Atp5g3/Ndufa8/Pnp/Gpi1/Tpi1/Ndufab1/Ndufb10/Atp5a1/Ndufs3/Pgk1/Pid1/Sdh…	GO Biological Process
Dendritic	GO:0009199	ribonucleoside triphosphate metabolic process	150	0.665111	1.65639	1e-10	2.61208e-08	2.44737e-08	1455	tags=52%, list=20%, signal=43%	Nme2/Atp5g1/Gapdh/Atpif1/Tspo/Ndufa13/Atp5c1/Atp5e/Atp5g2/Atp5j2/Atp5d/Ndufa7/Atp5l/Atp5j/Atp5b/Ndufb8/Ndufb7/Ndufa3/Atp5h/Ndufs4/Ndufb9/Rhoa/Ndufb11/Ran/Aldoa/Ndufc2/Ndufb5/Eno1/Atp5o/Atp5k/Ndufv2/Sdhb/Ndufs5/Fis1/Ndufa1/Ndufa2/Ndufv3/Ndufa11/Ndufa12/Ndufc1/Atp1b1/Ndufb3/Ndufs8/Pkm/Ndufa5/Ndufa6/Eif6/Pgam1/Nme1/Ndufb4/Ndufb2/Atp5g3/Ndufa8/Pnp/Gpi1/Tpi1/Ndufab1/Ndufb10/Atp5a1/Ndufs3/Pgk1/Pid1/Sdh…	GO Biological Process
Dendritic	GO:0045333	cellular respiration	158	0.654671	1.63535	1e-10	2.61208e-08	2.44737e-08	1475	tags=55%, list=20%, signal=45%	Uqcrb/Cox7c/Cox5b/Ndufa13/Atp5c1/Atp5e/Cox5a/Cox7a2/Atp5j2/Atp5d/Chchd2/Cycs/Prelid1/Ndufa7/Atp5j/Atp5b/Park7/Cox4i1/Uqcr10/Ndufb8/Ndufb7/Ndufa3/Atp5h/Ndufs4/Cox6a2/Bax/Ndufb9/Rhoa/Ndufb11/Iscu/Ndufc2/Ndufb5/Cox7a2l/Atp5o/Atp5k/Ndufv2/Sdhb/Uqcrq/Ndufs5/Uqcr11/Ndufa1/Ndufa2/Ndufv3/Ndufa11/Ndufa12/Ndufc1/Fh1/Ndufb3/Ndufs8/Etfb/Ndufa5/Ndufa6/Ndufb4/Ndufb2/Uqcrfs1/Uqcc2/Uqcrh/Ndufa8/Bloc1s1/Mdh1/Nduf…	GO Biological Process
Dendritic	GO:0009144	purine nucleoside triphosphate metabolic process	153	0.655387	1.63439	1e-10	2.61208e-08	2.44737e-08	1455	tags=51%, list=20%, signal=42%	Nme2/Atp5g1/Gapdh/Atpif1/Tspo/Ndufa13/Atp5c1/Atp5e/Atp5g2/Atp5j2/Atp5d/Ndufa7/Atp5l/Atp5j/Atp5b/Ndufb8/Ndufb7/Ndufa3/Atp5h/Ndufs4/Ndufb9/Rhoa/Ndufb11/Ran/Aldoa/Ndufc2/Ndufb5/Eno1/Atp5o/Atp5k/Ndufv2/Sdhb/Ndufs5/Fis1/Ndufa1/Ndufa2/Ndufv3/Ndufa11/Ndufa12/Ndufc1/Atp1b1/Ndufb3/Ndufs8/Pkm/Ndufa5/Ndufa6/Eif6/Pgam1/Nme1/Ndufb4/Ndufb2/Atp5g3/Ndufa8/Pnp/Gpi1/Tpi1/Ndufab1/Ndufb10/Atp5a1/Ndufs3/Pgk1/Pid1/Sdh…	GO Biological Process
Dendritic	GO:0009152	purine ribonucleotide biosynthetic process	120	0.661004	1.6339	1e-10	2.61208e-08	2.44737e-08	1427	tags=54%, list=20%, signal=44%	Nme2/Atp5g1/Ndufa13/Atp5c1/Atp5e/Atp5g2/Atp5j2/Atp5d/Ndufa7/Atp5l/Atp5j/Atp5b/Ndufb8/Mpc2/Ndufb7/Ndufa3/Atp5h/Ndufs4/Ndufb9/Ndufb11/Aldoa/Ndufc2/Ndufb5/Eno1/Atp5o/Mpc1/Atp5k/Ndufv2/Sdhb/Ndufs5/Ndufa1/Ndufa2/Ndufv3/Ndufa11/Ndufa12/Ndufc1/Ndufb3/Ndufs8/Pkm/Ndufa5/Ndufa6/Nme1/Ndufb4/Ndufb2/Atp5g3/Ndufa8/Pnp/Ndufab1/Ndufb10/Hprt/Atp5a1/Ndufs3/Pid1/Sdhd/Ndufs6/Vcp/Ak2/Ndufs7/Ndufa9/Ndufb6/Dguok/Tgfb1/…	GO Biological Process
Dendritic	GO:0009260	ribonucleotide biosynthetic process	124	0.657143	1.62594	1e-10	2.61208e-08	2.44737e-08	1427	tags=53%, list=20%, signal=44%	Nme2/Atp5g1/Ndufa13/Atp5c1/Atp5e/Atp5g2/Atp5j2/Atp5d/Ndufa7/Atp5l/Atp5j/Atp5b/Ndufb8/Mpc2/Ndufb7/Ndufa3/Atp5h/Ndufs4/Ndufb9/Ndufb11/Aldoa/Ndufc2/Ndufb5/Eno1/Atp5o/Mpc1/Atp5k/Ndufv2/Sdhb/Ndufs5/Ndufa1/Ndufa2/Ndufv3/Ndufa11/Ndufa12/Ndufc1/Ndufb3/Ndufs8/Pkm/Ndufa5/Ndufa6/Nme1/Ndufb4/Ndufb2/Atp5g3/Ndufa8/Pnp/Cmpk1/Ndufab1/Ndufb10/Hprt/Atp5a1/Ndufs3/Pid1/Sdhd/Ndufs6/Vcp/Ak2/Ndufs7/Ndufa9/Ndufb6/Dguok/…	GO Biological Process
Dendritic	GO:0009141	nucleoside triphosphate metabolic process	161	0.647199	1.61726	1e-10	2.61208e-08	2.44737e-08	1455	tags=50%, list=20%, signal=41%	Nme2/Atp5g1/Gapdh/Atpif1/Tspo/Ndufa13/Atp5c1/Atp5e/Atp5g2/Atp5j2/Atp5d/Ndufa7/Atp5l/Atp5j/Atp5b/Ndufb8/Ndufb7/Ndufa3/Atp5h/Ndufs4/Ndufb9/Rhoa/Ndufb11/Ran/Aldoa/Ndufc2/Ndufb5/Eno1/Atp5o/Atp5k/Ndufv2/Sdhb/Ndufs5/Fis1/Ndufa1/Ndufa2/Ndufv3/Ndufa11/Ndufa12/Ndufc1/Atp1b1/Ndufb3/Ndufs8/Pkm/Ndufa5/Ndufa6/Eif6/Pgam1/Nme1/Ndufb4/Ndufb2/Atp5g3/Ndufa8/Pnp/Gpi1/Tpi1/Cmpk1/Ndufab1/Dctpp1/Ndufb10/Atp5a1/Ndufs3/…	GO Biological Process
Dendritic	GO:0072522	purine-containing compound biosynthetic process	127	0.651743	1.61371	1e-10	2.61208e-08	2.44737e-08	1427	tags=51%, list=20%, signal=42%	Nme2/Atp5g1/Ndufa13/Atp5c1/Atp5e/Atp5g2/Atp5j2/Atp5d/Ndufa7/Atp5l/Atp5j/Atp5b/Ndufb8/Mpc2/Ndufb7/Ndufa3/Atp5h/Ndufs4/Ndufb9/Ndufb11/Aldoa/Ndufc2/Ndufb5/Eno1/Atp5o/Mpc1/Atp5k/Ndufv2/Sdhb/Ndufs5/Ndufa1/Ndufa2/Ndufv3/Ndufa11/Ndufa12/Ndufc1/Ndufb3/Ndufs8/Pkm/Ndufa5/Ndufa6/Nme1/Ndufb4/Ndufb2/Atp5g3/Ndufa8/Pnp/Ndufab1/Ndufb10/Hprt/Atp5a1/Ndufs3/Pid1/Sdhd/Ndufs6/Vcp/Ak2/Ndufs7/Ndufa9/Ndufb6/Dguok/Tgfb1/…	GO Biological Process
Dendritic	GO:0046390	ribose phosphate biosynthetic process	130	0.647019	1.60139	1e-10	2.61208e-08	2.44737e-08	1427	tags=51%, list=20%, signal=42%	Nme2/Atp5g1/Ndufa13/Atp5c1/Atp5e/Atp5g2/Atp5j2/Atp5d/Ndufa7/Atp5l/Atp5j/Atp5b/Ndufb8/Mpc2/Ndufb7/Ndufa3/Atp5h/Ndufs4/Ndufb9/Ndufb11/Aldoa/Ndufc2/Ndufb5/Eno1/Atp5o/Mpc1/Atp5k/Ndufv2/Sdhb/Ndufs5/Ndufa1/Ndufa2/Ndufv3/Ndufa11/Ndufa12/Ndufc1/Ndufb3/Ndufs8/Pkm/Ndufa5/Ndufa6/Nme1/Ndufb4/Ndufb2/Atp5g3/Ndufa8/Pnp/Cmpk1/Ndufab1/Ndufb10/Hprt/Atp5a1/Ndufs3/Pid1/Sdhd/Ndufs6/Vcp/Ak2/Ndufs7/Ndufa9/Ndufb6/Dguok/…	GO Biological Process
Dendritic	GO:0015980	energy derivation by oxidation of organic compounds	197	0.625493	1.57204	1e-10	2.61208e-08	2.44737e-08	1476	tags=48%, list=20%, signal=40%	Uqcrb/Cox7c/Cox5b/Ndufa13/Atp5c1/Atp5e/Cox5a/Hmgb1/Cox7a2/Atp5j2/Atp5d/Chchd2/Cycs/Prelid1/Ndufa7/Ldha/Atp5j/Atp5b/Park7/Cox4i1/Uqcr10/Ndufb8/Ndufb7/Ndufa3/Atp5h/Ndufs4/Cox6a2/Bax/Ndufb9/Rhoa/Ndufb11/Iscu/Ndufc2/Ndufb5/Gnas/Cox7a2l/Atp5o/Atp5k/Ndufv2/Sdhb/Uqcrq/Ndufs5/Uqcr11/Ndufa1/Ndufa2/Ndufv3/Ndufa11/Ndufa12/Ndufc1/Fh1/Ndufb3/Ndufs8/Etfb/Ndufa5/Ndufa6/Ndufb4/Ndufb2/Uqcrfs1/Uqcc2/Uqcrh/Ndufa8/P…	GO Biological Process
Dendritic	GO:0006412	translation	489	0.595881	1.52245	1e-10	2.61208e-08	2.44737e-08	1112	tags=33%, list=15%, signal=30%	Rpl10/Rps18/Rbm3/Rplp0/Uba52/Rpl15/Rpl32/Rpl28/Rps11/Rpl34/Rpl21/Rps15a/Rps7/Rpl14/Rps3/Rpl11/Rps2/Rpl36/Rpl9/Rps5/Rpl10a/Rps4x/Eef1b2/Rpl26/Rpl39/Rpl24/Rpl13/Rpl19/Gapdh/Rpl3/Rpl8/Rpl35/Rpsa/Rps20/Fau/Rpl27a/Rpl6/Rpl37/Rpl12/Rps10/Rps23/Rps29/Rps13/Rpl17/Rpl18a/Rpl31/Rps16/Eif5a/Rpl18/Rpl23/Rps27a/Rps24/Rps28/Rpl30/Rps3a1/Rps25/Rpl22l1/Eif3h/Rpl7a/Rps14/Rpl7/Eif1/Rps19/Ybx1/Vim/Eef1a1/Rpl13a/Rac…	GO Biological Process
Dendritic	GO:0043043	peptide biosynthetic process	495	0.592967	1.51526	1e-10	2.61208e-08	2.44737e-08	1112	tags=33%, list=15%, signal=30%	Rpl10/Rps18/Rbm3/Rplp0/Uba52/Rpl15/Rpl32/Rpl28/Rps11/Rpl34/Rpl21/Rps15a/Rps7/Rpl14/Rps3/Rpl11/Rps2/Rpl36/Rpl9/Rps5/Rpl10a/Rps4x/Eef1b2/Rpl26/Rpl39/Rpl24/Rpl13/Rpl19/Gapdh/Rpl3/Rpl8/Rpl35/Rpsa/Rps20/Fau/Rpl27a/Rpl6/Rpl37/Rpl12/Rps10/Rps23/Rps29/Rps13/Rpl17/Rpl18a/Rpl31/Rps16/Eif5a/Rpl18/Rpl23/Rps27a/Rps24/Rps28/Rpl30/Rps3a1/Rps25/Rpl22l1/Eif3h/Rpl7a/Rps14/Rpl7/Eif1/Rps19/Ybx1/Vim/Eef1a1/Rpl13a/Rac…	GO Biological Process
Dendritic	GO:0006091	generation of precursor metabolites and energy	262	0.596212	1.50644	1e-10	2.61208e-08	2.44737e-08	1476	tags=42%, list=20%, signal=35%	Gapdh/Uqcrb/Cox7c/Cox5b/Ndufa13/Atp5c1/Atp5e/Cox5a/Hmgb1/Cox7a2/Atp5j2/Atp5d/Chchd2/Taldo1/Cycs/Prelid1/Pgls/Ndufa7/Ldha/Atp5j/Atp5b/Park7/Ndufa4/Cox4i1/Uqcr10/Ndufb8/Ndufb7/Ndufa3/Atp5h/Ndufs4/Cox6a2/Bax/Ndufb9/Rhoa/Ndufb11/Iscu/Aldoa/Ndufc2/Ndufb5/Gnas/Eno1/Cox7a2l/Atp5o/Atp5k/Ndufv2/Sdhb/Uqcrq/Ndufs5/Uqcr11/Ndufa1/Ndufa2/Ndufv3/Ndufa11/Ndufa12/Ndufc1/Fh1/Ndufb3/Ndufs8/Etfb/Pkm/Ndufa5/Ndufa6/Ei…	GO Biological Process
Dendritic	mmu04612	Antigen processing and presentation - Mus musculus (house mouse)	50	0.755524	1.78515	1.26471e-09	2.71492e-08	2.21879e-08	807	tags=56%, list=11%, signal=50%	H2-Eb1/H2-Ab1/Cd74/H2-Aa/H2-DMb1/H2-D1/H2-DMa/Ifi30/Pdia3/H2-T23/Psme1/H2-M2/Ctss/Ctsl/Cd8a/Psme2/Calr/Hspa5/Klrd1/Tap1/H2-DMb2/H2-Oa/B2m/Ciita/Hsp90ab1/Hspa4/H2-M3/Ctsb	Kegg Pathway
Dendritic	GO:0003735	structural constituent of ribosome	153	0.788216	1.96474	1e-10	2.8275e-08	2.56053e-08	716	tags=63%, list=10%, signal=58%	Rpl10/Rps18/Rplp0/Uba52/Rpl15/Rpl32/Rpl28/Rps11/Rpl34/Rpl21/Rps15a/Rps7/Rpl14/Rps3/Rpl11/Rps2/Rpl36/Rpl9/Rps5/Rpl10a/Rps4x/Rpl26/Rpl39/Rpl24/Rpl13/Rpl19/Rpl3/Rpl8/Rpl35/Rpsa/Rps20/Fau/Rpl36al/Rpl27a/Rpl6/Rpl37/Rpl12/Rps10/Rps23/Rps29/Rps13/Rpl17/Rpl18a/Rpl31/Rps16/Rpl18/Rpl23/Rps27a/Rps24/Rps28/Rpl30/Rps3a1/Rps25/Rpl22l1/Rpl7a/Rps14/Rpl7/Rps19/Rpl13a/Rplp1/Ndufa7/Rps8/Rps21/Rps27/Rpl27/Rpl36a/Rpl…	GO Molecular Function
Dendritic	GO:0015078	proton transmembrane transporter activity	58	0.787589	1.89289	1e-10	2.8275e-08	2.56053e-08	906	tags=62%, list=12%, signal=55%	Cox8a/Atp5g1/Cox7c/Cox6c/Atp6v0e/Cox7b/Atp5c1/Atp5e/Cox5a/Atp5g2/Cox7a2/Atp5j2/Atp5d/Atp5l/Atp6v1g1/Slc25a4/Atp6v0c/Atp5j/Atp5b/Cox4i1/Atp6v1f/Atp5h/Cox6a2/Cox7a2l/Atp5o/Slc25a5/Atp5k/Uqcrq/Uqcr11/Atp6v0b/Uqcrfs1/Atp5g3/Uqcrh/Cox6a1/Cyc1/Atp5a1	GO Molecular Function
Dendritic	GO:0005198	structural molecule activity	239	0.731496	1.84818	1e-10	2.8275e-08	2.56053e-08	716	tags=47%, list=10%, signal=44%	Rpl10/Rps18/Rplp0/Uba52/Rpl15/Rpl32/Rpl28/Rps11/Rpl34/Rpl21/Rps15a/Rps7/Rpl14/Rps3/Rpl11/Rps2/Arpc3/Rpl36/Rpl9/Rps5/Rpl10a/Rps4x/Rpl26/Rpl39/Rpl24/Rpl13/Rpl19/Rpl3/Rpl8/Rpl35/Rpsa/Rps20/Fau/Rpl36al/Clta/Rpl27a/Rpl6/Rpl37/Rpl12/Rps10/Rps23/Rps29/Rps13/Arpc2/Rpl17/Rpl18a/Rpl31/Rps16/Rpl18/Rpl23/Rps27a/Rps24/Rps28/Rpl30/Actb/Rps3a1/Rps25/Rpl22l1/Rpl7a/Arpc1b/Rps14/Rpl7/Rps19/Vim/Rpl13a/Rplp1/Ndufa7/…	GO Molecular Function
Dendritic	GO:0015399	primary active transmembrane transporter activity	77	0.713315	1.73793	1e-10	2.8275e-08	2.56053e-08	912	tags=52%, list=12%, signal=46%	Sec61g/Cox8a/Cox7c/Cox6c/Atp6v0e/Cox7b/Atp5e/Cox5a/Cox7a2/Ndufa7/Atp5l/Atp6v1g1/Atp6v0c/Atp5b/Cox4i1/Ndufb8/Atp6v1f/Ndufb7/Ndufs4/Cox6a2/Anxa5/Ndufc2/Tomm20/Cox7a2l/Ndufv2/Uqcrq/Uqcr11/Atp6v0b/Atp1a1/Ndufa2/Tap1/Atp1b1/Ndufs8/Uqcrfs1/Uqcrh/Cyb561a3/Cox6a1/Cyc1/Atp6v1d/Ndufs3	GO Molecular Function
Dendritic	mmu04723	Retrograde endocannabinoid signaling - Mus musculus (house mouse)	66	0.71754	1.7224	1.67864e-09	3.37826e-08	2.76092e-08	1386	tags=67%, list=19%, signal=54%	Ndufa13/Gng5/Ndufa7/Gng10/Ndufa4/Ndufb8/Ndufb7/Ndufa3/Ndufs4/Ndufb9/Ndufb11/Gnai2/Ndufc2/Ndufb5/Ndufv2/Ndufs5/Ndufa1/Ndufa2/Ndufv3/Ndufa11/Ndufa12/Ndufc1/Ndufb3/Ndufs8/Ndufa5/Ndufa6/Ndufb4/Ndufb2/Ndufa8/Ndufab1/Ndufb10/Ndufs3/Gnb1/Itpr1/Gnb2/Ndufs6/Gng12/Ndufs7/Ndufa9/Ndufb6/Gng2/Gngt2/Ndufa10/Ndufs2	Kegg Pathway
Dendritic	GO:0019843	rRNA binding	63	0.738961	1.78609	2.73698e-10	6.19105e-08	5.60649e-08	885	tags=51%, list=12%, signal=45%	Rps18/Rplp0/Rps11/Rps3/Rpl11/Rpl9/Rps5/Rps4x/Rpl19/Rpl3/Rpl8/Rpl6/Rpl37/Rpl12/Rps13/Rpl17/Rpl23/Rps14/Rpl7/Rpl4/Rpl5/Npm1/Rps9/Cirbp/Mrpl18/Rpl37a/Mrpl20/Ncl/Eef2/Mrps18c/Nop53/Rpl23a	GO Molecular Function
Dendritic	mmu03050	Proteasome - Mus musculus (house mouse)	44	0.738873	1.73681	1.67563e-07	3.17383e-06	2.59385e-06	1287	tags=75%, list=18%, signal=62%	Psmb8/Psmb9/Pomp/Psma3/Psme1/Psmb2/Psmb1/Psma2/Psma7/Psma4/Psmb5/Psme2/Psma5/Sem1/Psmb3/Psmb6/Psmd8/Psmb10/Psmb4/Psmc3/Psmd4/Psma1/Psmc5/Psma6/Psmd12/Psmd14/Psmb7/Psmc6/Psmc2/Psmd7/Psmd6/Psmd13/Psmc4	Kegg Pathway
Dendritic	GO:0002495	antigen processing and presentation of peptide antigen via MHC class II	19	0.870695	1.93118	2.49913e-08	4.12291e-06	3.86292e-06	726	tags=74%, list=10%, signal=67%	H2-Eb1/H2-Ab1/Cd74/H2-Aa/H2-DMb1/H2-DMa/Ifi30/Fcer1g/Ctss/Pycard/H2-DMb2/Unc93b1/H2-Oa/B2m	GO Biological Process
Dendritic	GO:0042255	ribosome assembly	48	0.740101	1.75395	2.94797e-08	4.73867e-06	4.43985e-06	885	tags=46%, list=12%, signal=41%	Rpl10/Rplp0/Rpl11/Rps2/Rps5/Rpl24/Rpsa/Rpl6/Rps28/Rps25/Rps14/Rps19/Rps27/Rpl38/Rpl5/Rps27l/Mrpl20/Eif6/Rps15/C1qbp/Nop53/Rpl23a	GO Biological Process
Dendritic	GO:0009055	electron transfer activity	46	0.740993	1.75724	3.57407e-08	5.05284e-06	4.57575e-06	912	tags=61%, list=12%, signal=54%	Cyba/Cox8a/Cox7c/Cox6c/Cox7b/Cox5a/Cox7a2/Ndufa7/Cox4i1/Ndufb8/Ndufb7/Ndufs4/Cox6a2/Ndufc2/Cox7a2l/Ndufv2/Sdhb/Uqcrq/Uqcr11/Ndufa2/Ndufs8/Etfb/Cybb/Uqcrfs1/Uqcrh/Cox6a1/Cyc1/Ndufs3	GO Molecular Function
Dendritic	mmu04260	Cardiac muscle contraction - Mus musculus (house mouse)	35	0.755656	1.75167	6.6971e-07	1.19804e-05	9.79108e-06	1184	tags=71%, list=16%, signal=60%	Cox8a/Uqcrb/Cox7c/Cox6c/Cox5b/Cox7b/Cox5a/Cox7a2/Cox6b1/Cox4i1/Uqcr10/Cox6a2/Tpm3/Cox7a2l/Uqcrq/Uqcr11/Atp1a1/Atp1b1/Uqcrfs1/Uqcrh/Cox6a1/Cyc1/Uqcrc1/Uqcrc2/Tpm4	Kegg Pathway
Dendritic	GO:0010257	NADH dehydrogenase complex assembly	43	0.738116	1.73432	1.03294e-07	1.47171e-05	1.3789e-05	1482	tags=74%, list=20%, signal=60%	Ndufb8/Ndufb7/Ndufa3/Ndufs4/Ndufb9/Ndufb11/Ndufc2/Ndufb5/Ndufs5/Ndufa1/Ndufa2/Ndufa11/Ndufa12/Ndufc1/Ndufb3/Ndufs8/Ndufa5/Ndufa6/Ndufb4/Ndufb2/Ndufa8/Ndufab1/Ndufb10/Ndufs3/Ndufaf8/Ndufs6/Ndufs7/Ndufa9/Ndufb6/Ndufa10/Ndufs2/Tmem126a	GO Biological Process
Dendritic	GO:0032981	mitochondrial respiratory chain complex I assembly	43	0.738116	1.73432	1.03294e-07	1.47171e-05	1.3789e-05	1482	tags=74%, list=20%, signal=60%	Ndufb8/Ndufb7/Ndufa3/Ndufs4/Ndufb9/Ndufb11/Ndufc2/Ndufb5/Ndufs5/Ndufa1/Ndufa2/Ndufa11/Ndufa12/Ndufc1/Ndufb3/Ndufs8/Ndufa5/Ndufa6/Ndufb4/Ndufb2/Ndufa8/Ndufab1/Ndufb10/Ndufs3/Ndufaf8/Ndufs6/Ndufs7/Ndufa9/Ndufb6/Ndufa10/Ndufs2/Tmem126a	GO Biological Process
Dendritic	mmu05323	Rheumatoid arthritis - Mus musculus (house mouse)	40	0.725902	1.69637	2.49359e-06	4.22599e-05	3.45373e-05	673	tags=42%, list=9%, signal=39%	H2-Eb1/H2-Ab1/H2-Aa/H2-DMb1/H2-DMa/Atp6v0e/Atp6v1g1/Atp6v0c/Ctsl/Atp6v1f/Fos/Ccl5/Atp6v0b/H2-DMb2/Cd86/Jun/H2-Oa	Kegg Pathway
Dendritic	mmu05322	Systemic lupus erythematosus - Mus musculus (house mouse)	21	0.81631	1.8233	2.93861e-06	4.73117e-05	3.8666e-05	898	tags=67%, list=13%, signal=58%	H2-Eb1/H2-Ab1/H3f3b/H2-Aa/H3f3a/H2-DMb1/H2-DMa/Snrpd1/Snrpb/H2-DMb2/Cd86/H2-Oa/Snrpd3/Ssb	Kegg Pathway
Dendritic	GO:0042274	ribosomal small subunit biogenesis	60	0.681148	1.63451	8.4717e-07	0.000110644	0.000103667	1140	tags=42%, list=16%, signal=35%	Rps7/Rps2/Rps5/Rpsa/Rps16/Rps24/Rps28/Rps25/Rps14/Rps19/Rps8/Rps21/Rps27/Rpl38/Rps17/Rps6/Npm1/Rps27l/Snu13/Rps15/Lsm6/Gtf2h5/Wdr43/Fcf1/Utp3	GO Biological Process
Dendritic	GO:1902600	proton transmembrane transport	40	0.735719	1.72082	2.39041e-06	0.000305826	0.000286541	679	tags=45%, list=9%, signal=41%	Atp5g1/Atp6v0e/Atp5g2/Atp5d/Atp6v1g1/Slc25a4/Atp6v0c/Atp5b/Park7/Ndufa4/Rnasek/Atp6v1f/Atp6v0b/Atp1a1/Atp1b1/Phb2/Cox17/Atp5g3	GO Biological Process
Dendritic	GO:0072111	cell proliferation involved in kidney development	6	-0.935789	-2.30564	2.56747e-06	0.000321909	0.00030161	476	tags=100%, list=7%, signal=94%	Myc/Pdgfb/Il6ra/Flcn/Ptch1	GO Biological Process
Dendritic	mmu05100	Bacterial invasion of epithelial cells - Mus musculus (house mouse)	41	0.691107	1.62043	2.58307e-05	0.000396071	0.000323693	1250	tags=49%, list=17%, signal=41%	Arpc3/Clta/Arpc2/Actb/Arpc1b/Arpc4/Actg1/Itgb1/Rhoa/Arpc5/Rac1/Cdc42/Actr3/Cd2ap/Wasf2/Ctnna1/Arpc5l/Cltb/Hcls1/Arpc1a	Kegg Pathway
Dendritic	GO:0022618	ribonucleoprotein complex assembly	136	0.573531	1.42124	4.38967e-06	0.000529208	0.000495837	903	tags=29%, list=12%, signal=26%	Rpl10/Rplp0/Rpl11/Rps2/Rps5/Rpl24/Rpsa/Rpl6/Snrpd2/Rps28/Rps25/Rps14/Rps19/Rpl13a/Rps27/Rpl38/Rpl5/Snrpd1/Snrpb/Snrpe/Lsm4/Snrpg/Rps27l/Snrpf/Snu13/Eif2s2/Mrpl20/Eif6/Eif5/Rps15/Hsp90ab1/Denr/Mbnl1/Snrpd3/Sf3b1/Nop53/Nudt21/Rpl23a/Eif4h	GO Biological Process
Dendritic	GO:0033218	amide binding	167	0.557034	1.39381	7.7112e-06	0.000545085	0.000493618	1364	tags=35%, list=19%, signal=29%	Cst3/H2-Eb1/H2-Ab1/Rplp0/Ppia/Ppib/Cd74/H2-Aa/Crip1/H2-D1/Itm2b/Clta/Pfdn5/H2-T23/H2-M2/Ctsl/Vdac2/Anxa5/Calr/Psap/Ramp1/Tomm20/Srp14/Map1lc3b/Tap1/Phb2/Pltp/Dbi/Acadl/Gltp/Hsp90ab1/Pitpna/H2-M3/Ctsb/Pfdn6/Scp2/Nfkbia/Itm2c/H2-K1/Itgb2/Vdac1/Pfdn2/Cltb/Pirb/Mthfs/Ppig/Pfdn1/Fkbp1a/Nktr/H2-Q4/Kdelr2/Dpp4/Hsd17b10/Cd36/H2-Q7/Tap2/Eci2/Csnk1a1	GO Molecular Function
Dendritic	GO:0001906	cell killing	88	0.6137	1.49927	8.40588e-06	0.000941009	0.00088167	1349	tags=41%, list=18%, signal=34%	Cxcl9/Tyrobp/Lgals3/H2-D1/Gapdh/Cadm1/Rpl30/H2-T23/Ctsh/Rps19/H2-M2/Prdx1/Dnase1l3/Spi1/Lyz2/Klrd1/Hmgn2/Tap1/Lamp1/Havcr2/Coro1a/Klrk1/Pnp/B2m/Hsp90ab1/H2-M3/Hprt/H2-K1/Stx7/Kif5b/Ctsc/Il7r/H2-Q4/Romo1/H2-Q7/Tap2	GO Biological Process
Dendritic	mmu05416	Viral myocarditis - Mus musculus (house mouse)	42	0.677199	1.5908	6.82482e-05	0.000998906	0.000816366	1037	tags=48%, list=14%, signal=41%	H2-Eb1/H2-Ab1/H2-Aa/H2-DMb1/H2-D1/H2-DMa/Actb/H2-T23/Cycs/H2-M2/Actg1/Rac1/H2-DMb2/Cd86/Rac2/H2-Oa/H2-M3/H2-K1/Itgb2/Fyn	Kegg Pathway
Dendritic	GO:0004129	cytochrome-c oxidase activity	11	0.86732	1.80955	2.01948e-05	0.00115845	0.00104907	804	tags=91%, list=11%, signal=81%	Cox8a/Cox7c/Cox6c/Cox7b/Cox5a/Cox7a2/Cox4i1/Cox6a2/Cox7a2l/Cox6a1	GO Molecular Function
Dendritic	GO:0004298	threonine-type endopeptidase activity	11	0.866833	1.80854	2.04854e-05	0.00115845	0.00104907	631	tags=91%, list=9%, signal=83%	Psmb8/Psmb9/Psmb2/Psmb1/Psma4/Psmb5/Psmb3/Psmb6/Psmb10/Psmb4	GO Molecular Function
Dendritic	mmu05332	Graft-versus-host disease - Mus musculus (house mouse)	23	0.752654	1.68743	8.71678e-05	0.00122035	0.000997343	970	tags=61%, list=14%, signal=53%	H2-Eb1/H2-Ab1/H2-Aa/H2-DMb1/H2-D1/H2-DMa/H2-T23/H2-M2/Klrd1/H2-DMb2/Cd86/H2-Oa/H2-M3/H2-K1	Kegg Pathway
Dendritic	GO:0023026	MHC class II protein complex binding	12	0.865739	1.83376	2.41124e-05	0.00129862	0.00117601	726	tags=75%, list=10%, signal=68%	H2-Eb1/H2-Ab1/Cd74/H2-Aa/H2-DMb1/H2-DMa/H2-DMb2/H2-Oa/B2m	GO Molecular Function
Dendritic	GO:0031386	protein tag	11	0.864581	1.80384	2.5425e-05	0.00130708	0.00118366	618	tags=82%, list=8%, signal=75%	Ubb/Uba52/Sumo2/Nedd8/Rps27a/Ubl5/Ubc/Sumo1/Isg15	GO Molecular Function
Dendritic	GO:0016675	oxidoreductase activity, acting on a heme group of donors	12	0.861384	1.82453	3.27925e-05	0.00161254	0.00146028	432	tags=75%, list=6%, signal=71%	Cox8a/Cox7c/Cox6c/Cox7b/Cox5a/Cox7a2/Cox4i1/Cox6a2/Cox7a2l	GO Molecular Function
Dendritic	mmu04530	Tight junction - Mus musculus (house mouse)	79	0.597917	1.44683	0.000130369	0.00174911	0.00142948	1250	tags=38%, list=17%, signal=32%	Arpc3/Arpc2/Actb/Arpc1b/Myl12b/Myl6/Myl12a/Arpc4/Actg1/Itgb1/Rhoa/Rap1a/Arpc5/Rac1/Cdc42/Actr3/Jun/Msn/Hspa4/Ybx3/Tuba1c/Arpc5l/Tuba1a/Rdx/Cdk4/Tuba1b/Hcls1/Arhgap17/Ppp2ca/Arpc1a	Kegg Pathway
Dendritic	GO:0042287	MHC protein binding	29	0.734572	1.68814	4.51815e-05	0.00196539	0.00177982	1349	tags=69%, list=18%, signal=56%	Cd74/H2-D1/Pdia3/H2-T23/H2-M2/Atp5b/Cd81/Klrd1/Tubb5/Tap1/Klrk1/H2-M3/Atp5a1/H2-K1/Bcap31/Vcp/Pirb/H2-Q4/H2-Q7/Tap2	GO Molecular Function
Dendritic	GO:0008135	translation factor activity, RNA binding	62	0.625835	1.50925	4.91102e-05	0.00205717	0.00186293	1634	tags=55%, list=22%, signal=43%	Eef1b2/Eif5a/Eif3h/Eif1/Eef1a1/Eif3k/Eif4a1/Eif3f/Eef1d/Eif3c/Eif3m/Eif3i/Eif2s2/Eif3g/Eif6/Eif5/Eef2/Denr/Eif5b/Eif4h/Eif4e2/Eif2s1/Eif3e/Eif1a/Eef1g/Mcts1/Mrpl58/Eif1ax/Eif2b2/Eif1b/Eif4g1/Eif1ad/Gspt1/Eif3d	GO Molecular Function
Dendritic	GO:0045182	translation regulator activity	98	0.582546	1.42926	5.36003e-05	0.00216507	0.00196064	1740	tags=48%, list=24%, signal=37%	Rpl10/Eef1b2/Eif5a/Eif3h/Rps14/Eif1/Eef1a1/Eif3k/Rpl22/Eif4a1/Eif3f/Eef1d/Eif3c/Rps9/Rps27l/Eif3m/Cnbp/Cirbp/Eif3i/Eif2s2/Eif3g/Eif6/Eif5/Eef2/Denr/Eif5b/Eif4h/Eif4e2/Eif2s1/Eif4a3/Eif3e/Abcf1/Eif1a/Eef1g/Mcts1/Mrpl58/Eif1ax/Eif2b2/Eif1b/Eif4g1/Eif1ad/Gspt1/Eif2ak2/Cyfip1/Eif3d/Eif4ebp1/Eefsec	GO Molecular Function
Dendritic	mmu04940	Type I diabetes mellitus - Mus musculus (house mouse)	23	0.741251	1.66186	0.000179777	0.00231552	0.00189239	970	tags=57%, list=14%, signal=49%	H2-Eb1/H2-Ab1/H2-Aa/H2-DMb1/H2-D1/H2-DMa/H2-T23/H2-M2/H2-DMb2/Cd86/H2-Oa/H2-M3/H2-K1	Kegg Pathway
Dendritic	mmu05321	Inflammatory bowel disease - Mus musculus (house mouse)	26	0.711553	1.60842	0.000200186	0.00247922	0.00202617	673	tags=35%, list=9%, signal=31%	H2-Eb1/H2-Ab1/H2-Aa/H2-DMb1/H2-DMa/Ifngr1/H2-DMb2/Jun/H2-Oa	Kegg Pathway
Dendritic	mmu05310	Asthma - Mus musculus (house mouse)	11	0.838104	1.74588	0.000243507	0.00290404	0.00237336	673	tags=73%, list=9%, signal=66%	H2-Eb1/H2-Ab1/H2-Aa/H2-DMb1/H2-DMa/Fcer1g/H2-DMb2/H2-Oa	Kegg Pathway
Dendritic	GO:1901798	positive regulation of signal transduction by p53 class mediator	21	0.778177	1.73606	3.31318e-05	0.00335005	0.0031388	721	tags=48%, list=10%, signal=43%	Ubb/Rps7/Rpl11/Rpl26/Rps20/Rpl37/Rpl23/Sh3glb1/Rps15/Ddx5	GO Biological Process
Dendritic	mmu05320	Autoimmune thyroid disease - Mus musculus (house mouse)	22	0.743715	1.66533	0.000328777	0.00365056	0.00298346	1396	tags=73%, list=19%, signal=59%	H2-Eb1/H2-Ab1/H2-Aa/H2-DMb1/H2-D1/H2-DMa/H2-T23/H2-M2/H2-DMb2/Cd86/H2-Oa/H2-M3/H2-K1/H2-Q4/H2-Q7/Cd40	Kegg Pathway
Dendritic	mmu05330	Allograft rejection - Mus musculus (house mouse)	22	0.743715	1.66533	0.000328777	0.00365056	0.00298346	1396	tags=73%, list=19%, signal=59%	H2-Eb1/H2-Ab1/H2-Aa/H2-DMb1/H2-D1/H2-DMa/H2-T23/H2-M2/H2-DMb2/Cd86/H2-Oa/H2-M3/H2-K1/H2-Q4/H2-Q7/Cd40	Kegg Pathway
Dendritic	GO:0071826	ribonucleoprotein complex subunit organization	141	0.557776	1.38437	4.06914e-05	0.00404912	0.00379379	1639	tags=38%, list=22%, signal=30%	Rpl10/Rplp0/Rpl11/Rps2/Rps5/Rpl24/Rpsa/Rpl6/Snrpd2/Rps28/Rps25/Rps14/Rps19/Rpl13a/Rps27/Rpl38/Rpl5/Snrpd1/Snrpb/Snrpe/Lsm4/Snrpg/Rps27l/Snrpf/Snu13/Eif2s2/Mrpl20/Eif6/Eif5/Rps15/Hsp90ab1/Denr/Mbnl1/Snrpd3/Sf3b1/Nop53/Nudt21/Rpl23a/Eif4h/Vcp/Snrpc/Kif5b/Luc7l2/Ramac/Lsm2/Mcts1/Prpf8/Ptges3/Srsf10/Mrto4/Prpf19/Eif3d/Srpk1	GO Biological Process
Dendritic	GO:0002697	regulation of immune effector process	215	0.523145	1.31546	4.4059e-05	0.00431571	0.00404357	1733	tags=36%, list=24%, signal=28%	Bst2/Cd74/Tyrobp/Lgals3/H2-DMb1/H2-D1/Fcer1g/Cadm1/Hmgb1/H2-T23/Mif/Rps19/H2-M2/Dnase1l3/Vamp8/Pycard/Hfe/Il4i1/Cfp/Cd300a/Spi1/Cd81/Cd47/Klrd1/Rap1a/Tap1/Tlr3/Grn/Lamp1/Havcr2/H2-DMb2/Ndfip1/Phb2/Cd86/Rac2/Lyn/Klrk1/C1qbp/Tmbim6/Pnp/Gpi1/B2m/Rtn4/Anxa1/Litaf/H2-M3/Scimp/Cd24a/Fgl2/Cuedc2/Pkn1/H2-K1/Stx7/Itgb2/Laptm5/Slamf8/Il7r/Lacc1/H2-Q4/Dpp4/Cd36/H2-Q7/Tap2/Tgfb1/Cd40/Nckap1l/Lilrb4a/Dhx36/Gf…	GO Biological Process
Dendritic	GO:0055105	ubiquitin-protein transferase inhibitor activity	7	0.909763	1.75585	0.000139645	0.00478603	0.00433413	666	tags=100%, list=9%, signal=91%	Rps7/Rpl11/Rps20/Rpl37/Rpl23/Rpl5/Rps15	GO Molecular Function
Dendritic	GO:1990948	ubiquitin ligase inhibitor activity	7	0.909763	1.75585	0.000139645	0.00478603	0.00433413	666	tags=100%, list=9%, signal=91%	Rps7/Rpl11/Rps20/Rpl37/Rpl23/Rpl5/Rps15	GO Molecular Function
Dendritic	GO:0042562	hormone binding	19	0.76646	1.69456	0.000153964	0.00497523	0.00450547	571	tags=42%, list=8%, signal=39%	Tspo/Sec61b/Ctsh/Anxa5/Calr/Ramp1/Atp1a1/Pkm	GO Molecular Function
Dendritic	GO:0002252	immune effector process	344	0.496215	1.26019	5.36003e-05	0.00516954	0.00484356	1753	tags=34%, list=24%, signal=27%	H2-Eb1/H2-Ab1/Bst2/Cd74/H2-Aa/Tyrobp/Lgals3/H2-DMb1/H2-D1/H2-DMa/Fcer1g/Lgals1/Cadm1/Hmgb1/H2-T23/Mif/Ctsh/Rps19/Irf8/H2-M2/Prdx1/Cd8a/Dnase1l3/Rps6/Vamp8/Pycard/Selenok/Hfe/Il4i1/Cfp/Cd300a/Spi1/Cd81/Prdx2/Cd47/Klrd1/Rap1a/Crlf2/Tap1/Irf7/Tlr3/Grn/Lamp1/Havcr2/H2-DMb2/Ndfip1/Phb2/Cd86/Rac2/Coro1a/Lyn/Klrk1/C1qbp/Ifi35/Unc93b1/Tmbim6/H2-Oa/Pnp/Gpi1/B2m/Rtn4/Anxa1/Litaf/H2-M3/Scimp/Hprt/Igkc/Csf2r…	GO Biological Process
Dendritic	mmu05152	Tuberculosis - Mus musculus (house mouse)	104	0.560165	1.37247	0.000535797	0.00556537	0.00454836	714	tags=22%, list=10%, signal=20%	H2-Eb1/H2-Ab1/Cd74/H2-Aa/Calm1/H2-DMb1/H2-DMa/Fcer1g/Cycs/Ctss/Atp6v0c/Cd209d/Bax/Rhoa/Ifngr1/Lsp1/Atp6v0b/Lamp1/H2-DMb2/Calm2/Coro1a/H2-Oa/Ciita	Kegg Pathway
Dendritic	mmu05168	Herpes simplex virus 1 infection - Mus musculus (house mouse)	158	0.522516	1.30052	0.000526638	0.00556537	0.00454836	991	tags=23%, list=14%, signal=20%	H2-Eb1/H2-Ab1/Bst2/Cd74/H2-Aa/H2-DMb1/H2-D1/H2-DMa/Pdia3/H2-T23/Cycs/H2-M2/Bax/Ifngr1/Calr/Cfp/Srsf9/Ccl5/Srsf5/Tap1/Irf7/Tlr3/Rheb/H2-DMb2/Srsf3/H2-Oa/Ppp1ca/B2m/Srsf2/H2-M3/Alyref/Srsf7/Ifnar2/Nfkbia/H2-K1/Eif2s1	Kegg Pathway
Dendritic	mmu05166	Human T-cell leukemia virus 1 infection - Mus musculus (house mouse)	152	0.531888	1.32038	0.000599908	0.00603657	0.00493345	1681	tags=34%, list=23%, signal=27%	H2-Eb1/H2-Ab1/H2-Aa/H2-DMb1/H2-D1/H2-DMa/Tspo/H2-T23/H2-M2/Slc25a4/Vdac2/Bax/Ranbp1/Tln1/Fos/Ran/Calr/Spi1/Slc25a5/Fdps/H2-DMb2/Jun/H2-Oa/Vdac3/B2m/H2-M3/Nfkbia/Map2k2/H2-K1/Relb/Anapc15/Cdk4/Itgb2/Vdac1/Anapc13/Hras/Anapc5/Anapc11/Il2rg/H2-Q4/Gps2/H2-Q7/Tgfb1/Cd40/Kras/Anapc16/Ccnd3/Akt1/Trp53/Bub3/H2-T22/Smad4	Kegg Pathway
Dendritic	mmu05140	Leishmaniasis - Mus musculus (house mouse)	46	0.640148	1.50681	0.000627384	0.00612175	0.00500306	673	tags=30%, list=9%, signal=28%	H2-Eb1/H2-Ab1/H2-Aa/Cyba/H2-DMb1/H2-DMa/Eef1a1/Itgb1/Ifngr1/Fos/H2-DMb2/Cybb/Jun/H2-Oa	Kegg Pathway
Dendritic	GO:0051861	glycolipid binding	11	0.832135	1.73614	0.000206429	0.00631002	0.00571422	860	tags=55%, list=12%, signal=48%	Ppt1/Manf/Psap/Lyn/Gltp/Sell	GO Molecular Function
Dendritic	GO:0043236	laminin binding	10	0.856087	1.76663	0.000221968	0.00660647	0.00598268	623	tags=60%, list=9%, signal=55%	Lgals3/Rpsa/Lgals1/Ctss/Itgb1/Ncl	GO Molecular Function
Dendritic	GO:1901137	carbohydrate derivative biosynthetic process	312	0.49517	1.25499	7.50165e-05	0.00701908	0.00657646	1653	tags=31%, list=23%, signal=25%	Nme2/Atp5g1/Itm2b/Ndufa13/Ost4/Atp5c1/Atp5e/Atp5g2/Atp5j2/Atp5d/Ndufa7/Atp5l/Krtcap2/Atp5j/Atp5b/Ndufb8/Mpc2/Ndufb7/Dad1/Ndufa3/Tmem258/Atp5h/Ndufs4/Ndufb9/Ndufb11/Akr1a1/Aldoa/Ndufc2/Ndufb5/Ramp1/Tmem59/Ostc/Eno1/Atp5o/Mpc1/Atp5k/Ndufv2/Sdhb/Ndufs5/Ndufa1/Ndufa2/Ndufv3/Ndufa11/Ndufa12/Ndufc1/Ndufb3/Ndufs8/Pkm/Ndufa5/Ndufa6/St8sia4/Ddost/Nme1/Ndufb4/Ndufb2/Atp5g3/Ndufa8/Pnp/Tpi1/Dpm1/Cmpk1/Ndufab…	GO Biological Process
Dendritic	mmu04514	Cell adhesion molecules - Mus musculus (house mouse)	54	0.60917	1.44656	0.00087467	0.00828364	0.00676989	1002	tags=35%, list=14%, signal=31%	H2-Eb1/H2-Ab1/H2-Aa/H2-DMb1/H2-D1/H2-DMa/Cadm1/H2-T23/H2-M2/Cd8a/Itgb1/H2-DMb2/Cd86/H2-Oa/H2-M3/Sell/Selplg/H2-K1/Itgb2	Kegg Pathway
Dendritic	GO:0006457	protein folding	118	0.557854	1.3775	9.98336e-05	0.00920377	0.00862339	1509	tags=44%, list=21%, signal=36%	Ppia/Ppib/Cd74/H2-DMb1/H2-DMa/Pdia3/Pfdn5/Sdf2l1/Selenof/Hsp90b1/Tbca/Calr/Hspa5/Dnajc7/Nudc/Cct2/Sh3glb1/Grn/H2-DMb2/Cdc37/Cct5/Bag1/Dnajb11/B2m/Cct4/Grpel1/Hsp90ab1/Pdcd5/Hspa4/Cct8/Pfdn6/Hspe1/P4hb/Dnajb6/Pdia5/Pfdn2/Erp44/Tor1a/Dnajc3/Ranbp2/Ppig/Pfdn1/Cct6a/Fkbp1a/Fkbp8/Nktr/Prdx4/Cct7/Ptges3/Stub1/St13/Dnajc2	GO Biological Process
Dendritic	mmu03040	Spliceosome - Mus musculus (house mouse)	122	0.530637	1.30641	0.0011137	0.010246	0.00837369	2255	tags=61%, list=31%, signal=42%	Snrpd2/Ccdc12/Hnrnpa1/Snrpd1/Snrpb/Snrpe/Lsm4/Snrpg/Srsf9/Snrpf/Sf3b6/Snu13/Cwc15/Srsf5/U2af1/Hnrnpa3/Srsf3/Ddx5/Srsf2/Lsm6/Syf2/Txnl4a/Alyref/Sf3b2/Snrpd3/Sf3b5/Sf3b1/Srsf7/Bcas2/Rbm8a/Hnrnpk/Hnrnpu/Magoh/Lsm5/Eif4a3/Snrpc/Phf5a/Rbm25/Lsm3/Ddx42/Snrpa1/Zmat2/U2surp/Prpf40a/Ddx46/Lsm2/Snrnp27/Cdc5l/Rp9/Prpf8/Snrnp40/Lsm7/Snw1/Thoc2/Srsf10/Prpf19/Prpf38b/Fus/Tra2b/Rbm17/Prpf31/Tcerg1/Ddx23/Ddx39b/…	Kegg Pathway
Dendritic	mmu05169	Epstein-Barr virus infection - Mus musculus (house mouse)	149	0.524563	1.30241	0.00116892	0.0104554	0.00854477	2120	tags=48%, list=30%, signal=34%	H2-Eb1/H2-Ab1/H2-Aa/H2-DMb1/H2-D1/H2-DMa/Pdia3/H2-T23/Cycs/Vim/H2-M2/Bax/Sem1/Calr/Psmd8/Rac1/Tap1/Irf7/H2-DMb2/Isg15/Psmc3/Lyn/Jun/H2-Oa/Psmd4/B2m/H2-M3/Gadd45b/Ifnar2/Nfkbia/Psmc5/Psmd12/Psmd14/H2-K1/Relb/Cdk4/Psmc6/Rbpj/Psmc2/Psmd7/Sap30/Psmd6/H2-Q4/Psmd13/Psmc4/H2-Q7/Tap2/Cd40/Snw1/Ccnd3/Psmd3/Ifnar1/Eif2ak2/Akt1/Trp53/Cd44/H2-T22/Nfkbib/Irf9/Ripk1/Stat2/Sap30l/Icam1/Ikbkb/Entpd1/Adrm1/Chuk/B…	Kegg Pathway
Dendritic	mmu05017	Spinocerebellar ataxia - Mus musculus (house mouse)	100	0.547754	1.33974	0.00120574	0.0104932	0.00857568	1287	tags=35%, list=18%, signal=29%	Psma3/Cycs/Slc25a4/Vdac2/Psmb2/Psmb1/Psma2/Psma7/Psma4/Psmb5/Psma5/Sem1/Psmb3/Psmb6/Psmd8/Slc25a5/Psmb4/Psmc3/Psmd4/Vdac3/Psma1/Psmc5/Psma6/Psmd12/Psmd14/Psmb7/Itpr1/Vdac1/Psmc6/Rbpj/Psmc2/Psmd7/Psmd6/Psmd13/Psmc4	Kegg Pathway
Dendritic	mmu05167	Kaposi sarcoma-associated herpesvirus infection - Mus musculus (house mouse)	129	0.530805	1.30985	0.00124256	0.010529	0.00860496	1863	tags=40%, list=26%, signal=30%	Ubb/Uba52/Calm1/H2-D1/Gng5/Rps27a/H2-T23/Cycs/H2-M2/Gng10/Bax/Ifngr1/Fos/Ubc/Rac1/Map1lc3b/Irf7/Atg3/Tlr3/Calm2/Cd86/Lyn/Jun/H2-M3/Ifnar2/Nfkbia/Gnb1/Map2k2/H2-K1/Itpr1/Gnb2/Cdk4/Hras/Gng12/H2-Q4/H2-Q7/Gng2/Gngt2/Kras/Ifnar1/Calm3/Eif2ak2/Tcf7l2/Akt1/Trp53/H2-T22/Mapkapk2/Irf9/Stat2/Ccr5/Icam1	Kegg Pathway
Dendritic	GO:0003729	mRNA binding	226	0.505654	1.27583	0.000416959	0.011502	0.0104159	2356	tags=45%, list=32%, signal=32%	Rps7/Rps3/Rps2/Rps5/Rpl26/Rpl24/Rpl35/Rpl6/Rps13/Rpl30/Rps3a1/Rps14/Rpl7/Ybx1/Eef1a1/Rpl13a/Park7/Hnrnpd/Rps26/Rpl41/Hnrnpa1/Rpl5/Calr/Sf3b6/Cnbp/Cirbp/Srsf5/Slpi/Serbp1/Srrm2/Eif2s2/Nhp2/Pkm/Hnrnpa3/Ncl/Cct5/Srsf3/Tpr/C1qbp/Mbd2/Ddx5/Denr/Alyref/Ybx3/Sf3b1/Nudt21/Ssb/Tsn/Rbm8a/Hnrnpk/Hnrnpu/Slirp/Eif4a3/Rbm25/Luc7l2/Rsl1d1/Rnps1/Hdlbp/Hnrnpa0/Hnrnpa2b1/Thoc2/Eif4g1/Dhx36/Khdrbs1/Exosc8/Nsrp1/Eif…	GO Molecular Function
Dendritic	GO:0050821	protein stabilization	122	0.553094	1.36848	0.000130369	0.011511	0.0107851	1663	tags=37%, list=23%, signal=29%	Ppib/Cd74/Rps7/Tyrobp/Rpl11/Pfn1/Gapdh/Ifi30/Rpl23/Park7/Rpl5/Npm1/Calr/Cct2/Grn/Lamp1/Atp1b1/Tbrg1/Cdc37/Phb2/Sumo1/Cct5/Pdcd10/Bag1/Rtn4/Cct4/Hsp90ab1/Cct8/Nop53/Gtpbp4/Pim1/Cct6a/Hypk/Stk4/Pin1/Cct7/Ptges3/Ube2b/Sugt1/Pdcl3/Phb/Flot1/Atp1b3/Ncor1/Trp53	GO Biological Process
Dendritic	GO:0050839	cell adhesion molecule binding	89	0.562783	1.3781	0.000480845	0.0129485	0.0117259	1529	tags=39%, list=21%, signal=31%	Ppia/Fxyd5/Rpsa/Cadm1/Hmgb1/Cd9/Itgb1/Tln1/Calr/Jaml/Cd81/Cd47/Shtn1/Isg15/Lyn/Bsg/Msn/Ppp1ca/Rtn4/Cd2ap/Sell/P4hb/Ctnna1/Rdx/Itgae/Itgb2/Cd200/Pirb/Adam8/Fermt3/Tgfbi/Nptn/Lcp1/Sdcbp/Lilrb4a	GO Molecular Function
Dendritic	mmu05170	Human immunodeficiency virus 1 infection - Mus musculus (house mouse)	142	0.519698	1.28693	0.0015739	0.0129948	0.0106201	1397	tags=30%, list=19%, signal=25%	Bst2/Calm1/H2-D1/Elob/Cfl1/Pdia3/Gng5/Rbx1/H2-T23/Cycs/H2-M2/Gng10/Bax/Gnai2/Fos/Calr/Rac1/Tap1/Calm2/Rac2/Jun/B2m/H2-M3/Eloc/Nfkbia/Pak2/Gnb1/Map2k2/H2-K1/Itpr1/Gnb2/Hras/Gng12/Rnf7/Apobec3/Pak1/H2-Q4/Cul1/H2-Q7/Gng2/Tap2/Gngt2/Kras	Kegg Pathway
Dendritic	GO:0034341	response to interferon-gamma	82	0.589195	1.43367	0.000171179	0.0143083	0.013406	1762	tags=44%, list=24%, signal=34%	H2-Eb1/H2-Ab1/Bst2/Cd74/H2-Aa/Ifitm2/Gapdh/Ifitm3/Vim/Rpl13a/Irf8/Vamp8/Actg1/Ccl5/Cd47/Zyx/Cdc42/Actr3/Cdc37/Cxcl16/Ciita/Rab7b/Rab43/Nmi/Parp14/Kif5b/Eprs/H2-Q7/Stx8/Cd40/Gsn/Trp53/Actr2/Stx4a/Was/Vamp3	GO Biological Process
Dendritic	GO:0042626	ATPase-coupled transmembrane transporter activity	45	0.633739	1.49908	0.000554114	0.0145745	0.0131984	555	tags=31%, list=8%, signal=29%	Sec61g/Atp6v0e/Atp5e/Atp5l/Atp6v1g1/Atp6v0c/Atp5b/Atp6v1f/Anxa5/Tomm20/Atp6v0b/Atp1a1/Tap1/Atp1b1	GO Molecular Function
Dendritic	mmu04137	Mitophagy - animal - Mus musculus (house mouse)	51	0.595676	1.40728	0.00186843	0.0150408	0.0122923	1630	tags=45%, list=23%, signal=35%	Ubb/Uba52/Rps27a/Gabarap/Tomm7/Gabarapl2/Fis1/Ubc/Map1lc3b/Tax1bp1/Jun/Rab7b/Bnip3l/Rab7/Hras/Csnk2b/Kras/Csnk2a1/Fundc1/Tbc1d15/Usp8/Sqstm1/Trp53	Kegg Pathway
Dendritic	mmu05132	Salmonella infection - Mus musculus (house mouse)	182	0.500784	1.25019	0.00197942	0.0155457	0.0127049	1690	tags=35%, list=24%, signal=27%	Rps3/Pfn1/Arpc3/Txn1/Gapdh/Arpc2/Actb/Arpc1b/Myl12b/Cycs/Myl12a/Pycard/Rala/Hsp90b1/Bax/Arpc4/Actg1/Rhoa/Brk1/Fos/Arf1/Tubb5/Arpc5/Rac1/Cdc42/Tubb2a/Dctn3/Actr3/Dynlt1f/Jun/Cyth4/Hsp90ab1/Rab7b/S100a10/M6pr/Tuba1c/Dctn2/Arpc5l/Nfkbia/Dynlrb1/Tuba1a/Tubb4b/Map2k2/Pkn1/Rab7/Tuba1b/Hras/Txn2/Kif5b/Arpc1a/Pak1/Dynll1/Dynlt1a/Arf6/Nckap1l/Rab5a/Tubb2b/Cyfip1/Tcf7l2/Akt1/Actr10/Actr2/Dync1i2	Kegg Pathway
Dendritic	GO:0004707	MAP kinase activity	10	-0.665479	-2.05792	0.000629002	0.0161682	0.0146416	2453	tags=100%, list=34%, signal=67%	Mapk1/Map3k7/Nlk/Mapk3/Mapk8/Mapk6/Map2k7/Mapk14/Mapk7	GO Molecular Function
Dendritic	mmu05418	Fluid shear stress and atherosclerosis - Mus musculus (house mouse)	70	0.574387	1.38426	0.00216441	0.0165938	0.0135614	2036	tags=44%, list=28%, signal=32%	Cyba/Calm1/Txn1/Sumo2/Actb/Ctsl/Hsp90b1/Actg1/Rhoa/Fos/Rac1/Calm2/Sumo1/Rac2/Jun/Hsp90ab1/Ass1/Klf2/Txn2/Sumo3/Gstp1/Calm3/Akt1/Sqstm1/Trp53/Sdc4/Icam1/Gsto1/Mef2c/Ikbkb/Chuk	Kegg Pathway
Dendritic	GO:0003954	NADH dehydrogenase activity	15	0.765543	1.65817	0.000712759	0.0175246	0.0158699	1412	tags=87%, list=19%, signal=70%	Ndufa7/Ndufb8/Ndufb7/Ndufs4/Ndufc2/Ndufv2/Ndufa2/Ndufs8/Ndufs3/Ndufs7/Ndufa9/Ndufa10/Ndufs2	GO Molecular Function
Dendritic	GO:0046794	transport of virus	8	0.867625	1.71374	0.00023312	0.0189796	0.0177828	250	tags=38%, list=3%, signal=36%	Bst2/Ctsl/Rnasek	GO Biological Process
Dendritic	GO:0097529	myeloid leukocyte migration	105	0.562453	1.38241	0.000248355	0.0199607	0.018702	1165	tags=30%, list=16%, signal=25%	Ppia/Ppib/Cd74/Cxcl9/Lgals3/Aif1/Fcer1g/Hmgb1/Mif/Rps19/Rpl13a/Cd9/Selenok/Jaml/Cd300a/Spi1/Cd81/Ccl5/Cd47/Rac1/Rac2/Lyn/Bsg/C1qbp/Rtn4/Anxa1/Sell/Itgb2/Cd200/Adam8/Slamf8	GO Biological Process
Dendritic	mmu05133	Pertussis - Mus musculus (house mouse)	38	0.617429	1.43653	0.00283319	0.0209839	0.0171493	649	tags=26%, list=9%, signal=24%	Calm1/Cfl1/Irf8/Pycard/Itgb1/Rhoa/Gnai2/Fos/Calm2/Jun	Kegg Pathway
Dendritic	mmu04810	Regulation of actin cytoskeleton - Mus musculus (house mouse)	113	0.527356	1.29452	0.00286736	0.0209839	0.0171493	1724	tags=36%, list=24%, signal=28%	Pfn1/Arpc3/Tmsb4x/Arpc2/Cfl1/Actb/Arpc1b/Myl12b/Myl12a/Arpc4/Actg1/Itgb1/Rhoa/Brk1/Arpc5/Rac1/Cdc42/Actr3/Rac2/Msn/Ppp1ca/Wasf2/Arpc5l/Pak2/Map2k2/Rdx/Itgae/Itgb2/Hras/Gng12/Arpc1a/Pak1/Kras/Iqgap1/Nckap1l/Gsn/Cyfip1/Akt1/Actr2/Itga4/Diaph1	Kegg Pathway
Dendritic	GO:1902255	positive regulation of intrinsic apoptotic signaling pathway by p53 class mediator	6	0.92183	1.70787	0.000268786	0.0209848	0.0196615	541	tags=83%, list=7%, signal=77%	Ubb/Rps7/Rpl11/Rpl26/Sh3glb1	GO Biological Process
Dendritic	GO:1904667	negative regulation of ubiquitin protein ligase activity	5	0.937795	1.67838	0.000266295	0.0209848	0.0196615	320	tags=80%, list=4%, signal=77%	Rps7/Rpl11/Rpl23/Rpl5	GO Biological Process
Dendritic	GO:0001909	leukocyte mediated cytotoxicity	69	0.598433	1.4463	0.000271139	0.0209848	0.0196615	1696	tags=45%, list=23%, signal=35%	Tyrobp/H2-D1/Cadm1/H2-T23/Ctsh/H2-M2/Prdx1/Dnase1l3/Spi1/Klrd1/Tap1/Lamp1/Havcr2/Coro1a/Klrk1/Pnp/B2m/H2-M3/Hprt/H2-K1/Stx7/Kif5b/Ctsc/Il7r/H2-Q4/H2-Q7/Tap2/Nckap1l/Gfer/Lag3/H2-T22	GO Biological Process
Dendritic	GO:0043021	ribonucleoprotein complex binding	131	0.529707	1.31517	0.0011137	0.0251919	0.0228133	1520	tags=36%, list=21%, signal=29%	Rbm3/Sec61g/Rpl35/Rpsa/Snrpd2/Eif5a/Sec61b/Eif1/Rack1/Rplp1/Eif3k/Eif3c/Snrpd1/Npm1/Snrpb/Hspa5/Serbp1/Spcs1/Eif6/Nme1/Eef2/C1qbp/Prmt1/Ppp1ca/Ddx5/Tmco1/Snrpd3/Ybx3/Eif4h/Tmem147/Hnrnpk/Hnrnpu/Eif2s1/Eif4a3/Snrpc/Csnk2b/Abcf1/Ezh2/Eif1a/Pim1/Srp19/Srpr/Rpn2/Csnk2a1/Nolc1/Dnajc2/Eif1b	GO Molecular Function
Dendritic	mmu04611	Platelet activation - Mus musculus (house mouse)	57	0.58044	1.38379	0.00368131	0.0263418	0.0215281	1262	tags=35%, list=18%, signal=29%	Fcer1g/Actb/Myl12b/Myl12a/Vamp8/Actg1/Itgb1/Rhoa/Gnai2/Tln1/Gnas/Rap1a/Lyn/Ppp1ca/Apbb1ip/Itpr1/Fyn/Orai1/Fermt3/Rap1b	Kegg Pathway
Dendritic	mmu04142	Lysosome - Mus musculus (house mouse)	92	0.541913	1.32009	0.00390403	0.0273282	0.0223342	1183	tags=32%, list=16%, signal=27%	Ppt1/Clta/Npc2/Gm2a/Ctsh/Ctss/Atp6v0c/Ctsl/Fuca1/Napsa/Cd68/Psap/Ctsz/Naga/Atp6v0b/Cd63/Lamp1/Asah1/Litaf/Ctsb/Ncoa7/M6pr/Gusb/Man2b1/Ppt2/Cltb/Laptm4a/Laptm5/Ctsc	Kegg Pathway
Dendritic	mmu04520	Adherens junction - Mus musculus (house mouse)	53	0.588708	1.3953	0.00420147	0.0281848	0.0230344	1698	tags=42%, list=24%, signal=32%	Actb/Myl12b/Myl12a/Actg1/Rhoa/Rap1a/Rac1/Cdc42/Rac2/Pdcd10/Wasf2/Ptpn1/Ctnna1/Fyn/Csnk2b/Rap1b/Iqgap1/Csnk2a1/Acp1/Tcf7l2/Smad4/Was	Kegg Pathway
Dendritic	mmu05164	Influenza A - Mus musculus (house mouse)	98	0.535199	1.30864	0.00412711	0.0281848	0.0230344	1015	tags=29%, list=14%, signal=25%	H2-Eb1/H2-Ab1/H2-Aa/H2-DMb1/H2-DMa/Actb/Cycs/Slc25a4/Pycard/Bax/Actg1/Ifngr1/Ccl5/Slc25a5/Fdps/Irf7/Tlr3/H2-DMb2/H2-Oa/Ciita/Ifnar2/Nfkbia/Pabpn1/Map2k2/Eif2s1/Cdk4/Vdac1/Rab11a	Kegg Pathway
Dendritic	GO:1903427	negative regulation of reactive oxygen species biosynthetic process	14	0.790766	1.69977	0.000388763	0.0286724	0.0268644	392	tags=43%, list=5%, signal=41%	Atp5g1/Cycs/Eef1a1/Park7/Rhoa/Ndufc2	GO Biological Process
Dendritic	GO:0005125	cytokine activity	23	0.695847	1.57373	0.00132147	0.0293055	0.0265385	724	tags=43%, list=10%, signal=39%	Cxcl9/Hmgb1/Mif/Ccl5/Crlf2/Grn/Cmtm7/Aimp1/Cxcl16/Gpi1	GO Molecular Function
Dendritic	mmu03060	Protein export - Mus musculus (house mouse)	21	0.683398	1.52643	0.00477446	0.031375	0.0256416	1330	tags=62%, list=19%, signal=51%	Sec61g/Sec61b/Spcs2/Sec11c/Srp9/Hspa5/Srp14/Spcs1/Sec62/Sec11a/Srp19/Srpr/Sec63	Kegg Pathway
Dendritic	GO:0001910	regulation of leukocyte mediated cytotoxicity	48	0.628921	1.49046	0.0004443	0.0323874	0.0303451	1696	tags=52%, list=23%, signal=40%	Tyrobp/H2-D1/Cadm1/H2-T23/H2-M2/Dnase1l3/Spi1/Klrd1/Tap1/Lamp1/Havcr2/Klrk1/Pnp/B2m/H2-M3/H2-K1/Stx7/Il7r/H2-Q4/H2-Q7/Tap2/Nckap1l/Gfer/Lag3/H2-T22	GO Biological Process
Dendritic	GO:0008137	NADH dehydrogenase (ubiquinone) activity	14	0.763308	1.64264	0.0015528	0.0331362	0.0300075	1412	tags=86%, list=19%, signal=69%	Ndufa7/Ndufb8/Ndufb7/Ndufs4/Ndufc2/Ndufv2/Ndufa2/Ndufs8/Ndufs3/Ndufs7/Ndufa10/Ndufs2	GO Molecular Function
Dendritic	GO:0050136	NADH dehydrogenase (quinone) activity	14	0.763308	1.64264	0.0015528	0.0331362	0.0300075	1412	tags=86%, list=19%, signal=69%	Ndufa7/Ndufb8/Ndufb7/Ndufs4/Ndufc2/Ndufv2/Ndufa2/Ndufs8/Ndufs3/Ndufs7/Ndufa10/Ndufs2	GO Molecular Function
Dendritic	GO:0051082	unfolded protein binding	57	0.59521	1.42973	0.00162912	0.0341211	0.0308993	2186	tags=65%, list=30%, signal=46%	Naca/Pfdn5/Hsp90b1/Npm1/Calr/Hspa5/Tomm20/Nudc/Cct2/Cdc37/Cct5/Dnajb11/Cct4/Grpel1/Hsp90ab1/Pet100/Cct8/Pfdn6/Hspe1/Dnajb6/Pfdn2/Tor1a/Pfdn1/Cct6a/Erlec1/Cct7/Ptges3/St13/Srsf10/Hspa14/Pfdn4/Tcp1/Dnaja2/Cct3/Canx/Nudcd3/Ccdc115	GO Molecular Function
Dendritic	mmu05135	Yersinia infection - Mus musculus (house mouse)	99	0.523804	1.28099	0.00539124	0.0347196	0.0283749	1005	tags=24%, list=14%, signal=21%	Arpc3/Arpc2/Actb/Arpc1b/Cd8a/Pycard/Arpc4/Actg1/Itgb1/Rhoa/Fos/Arpc5/Rac1/Skap2/Cdc42/Actr3/Rac2/Jun/Wasf2/Arpc5l/Nfkbia/Map2k2/Pkn1/Fyb	Kegg Pathway
Dendritic	GO:0050998	nitric-oxide synthase binding	7	0.858666	1.65723	0.0017875	0.0367575	0.0332869	159	tags=43%, list=2%, signal=42%	Cd74/Calm1/Actb	GO Molecular Function
Dendritic	GO:0001945	lymph vessel development	9	-0.682261	-2.01007	0.000524644	0.037375	0.0350181	298	tags=33%, list=4%, signal=32%	Syk/Nfatc1/Ngp	GO Biological Process
Dendritic	GO:0030595	leukocyte chemotaxis	98	0.556007	1.36329	0.000535797	0.0377406	0.0353607	1498	tags=37%, list=20%, signal=30%	Ppia/Ppib/Cd74/Cxcl9/Lgals3/Aif1/Fcer1g/Hmgb1/Mif/Rps19/Rpl13a/Calr/Jaml/Spi1/Ccl5/Rac1/Rac2/Gpsm3/Coro1a/Cxcl16/Lyn/Bsg/C1qbp/Anxa1/Slc8b1/Sell/Itgb2/Adam8/Cxcr3/Slamf8/Dpp4/Trpm2/Slamf9/Gpr183/Camk1d/Nckap1l	GO Biological Process
Dendritic	GO:0007005	mitochondrion organization	332	0.480987	1.22078	0.000544955	0.0379592	0.0355655	1679	tags=36%, list=23%, signal=29%	Atpif1/Tspo/Cox7a2/Atp5d/Chchd2/Prelid1/Slc25a4/Vdac2/Park7/Gabarap/Ndufb8/Ndufb7/Ndufa3/Micos13/Pycard/Rala/Ndufs4/Bax/Ndufb9/Tomm7/Ndufb11/Gabarapl2/Ndufc2/Ndufb5/Tomm20/Cox7a2l/Slc25a5/Timm13/Ndufs5/Fis1/Timm23/Ndufa1/Ndufa2/Bloc1s2/Gpx1/Ndufa11/Ndufa12/Map1lc3b/Atg3/Ndufc1/Sh3glb1/Ndufb3/Ndufs8/Ndufa5/Rab5if/Ndufa6/Cdc37/Phb2/Cox17/Ndufb4/Ndufb2/Jun/Uqcc2/Tomm22/Ndufa8/Coa3/Pnp/Mrpl17/Grpel1/…	GO Biological Process
Dendritic	GO:0002544	chronic inflammatory response	6	-0.787801	-1.94102	0.000639582	0.0381878	0.0357797	12	tags=50%, list=0%, signal=50%	Tnfaip3/S100a9/Camp	GO Biological Process
Dendritic	GO:1904666	regulation of ubiquitin protein ligase activity	10	0.835981	1.70927	0.000598552	0.0381878	0.0357797	470	tags=50%, list=6%, signal=47%	Rps7/Rpl11/Rpl23/Rpl5/Ube2s	GO Biological Process
Dendritic	GO:0007141	male meiosis I	6	0.909196	1.68446	0.000624142	0.0381878	0.0357797	1	tags=17%, list=0%, signal=17%	Ubb	GO Biological Process
Dendritic	GO:1905144	response to acetylcholine	8	0.847989	1.67495	0.000612865	0.0381878	0.0357797	375	tags=62%, list=5%, signal=59%	Rgs10/Tspo/Gnai2/Ly6e/Ly6c2	GO Biological Process
Dendritic	GO:0006690	icosanoid metabolic process	26	0.686748	1.55905	0.000574152	0.0381878	0.0357797	746	tags=27%, list=10%, signal=24%	Fabp5/Cd74/Alox5ap/Mif/Gpx4/Gpx1/Anxa1	GO Biological Process
Dendritic	GO:1903901	negative regulation of viral life cycle	26	0.685541	1.55631	0.000601711	0.0381878	0.0357797	371	tags=27%, list=5%, signal=26%	Ppia/Bst2/Cd74/Ifitm2/Ifitm3/Snx3/Ly6e	GO Biological Process
Dendritic	GO:0070972	protein localization to endoplasmic reticulum	54	0.610293	1.45501	0.000645701	0.0381878	0.0357797	1355	tags=46%, list=19%, signal=38%	Sec61g/Naca/Btf3/Sec61b/Spcs2/Chmp4b/Gabarapl2/Rer1/Srp9/Hspa5/Srp14/Spcs1/Vapa/Rtn4/Os9/Sec62/Bcap31/Ddrgk1/Bcap29/Herpud1/Srp19/Ssr3/Srpr/Kdelr2/Sec63	GO Biological Process
Dendritic	GO:0030833	regulation of actin filament polymerization	79	0.576799	1.4021	0.000636543	0.0381878	0.0357797	1682	tags=39%, list=23%, signal=31%	Pfn1/Arpc3/Tmsb4x/Tmsb10/Arpc2/Cfl1/Arpc1b/Pycard/Arpc4/Rhoa/Capza2/Arpc5/Rac1/Actr3/Coro1a/Dbnl/Arhgap18/Arpc5l/Capzb/Rdx/Hcls1/Arpc1a/Dbn1/Cotl1/Grb2/Arf6/Nckap1l/Gsn/Eps8/Cyfip1/Mtpn	GO Biological Process
Dendritic	GO:0008064	regulation of actin polymerization or depolymerization	90	0.560683	1.3709	0.000636543	0.0381878	0.0357797	1733	tags=40%, list=24%, signal=31%	Pfn1/Arpc3/Tmsb4x/Tmsb10/Arpc2/Cfl1/Arpc1b/Pycard/Arpc4/Rhoa/Brk1/Capza2/Arpc5/Rac1/Actr3/Coro1a/Dbnl/Arhgap18/Plek/Arpc5l/Capzb/Rdx/Hcls1/Lima1/Arpc1a/Dbn1/Cotl1/Grb2/Arf6/Dstn/Nckap1l/Gsn/Eps8/Cyfip1/Mtpn/Was	GO Biological Process
Dendritic	GO:0030832	regulation of actin filament length	90	0.560683	1.3709	0.000636543	0.0381878	0.0357797	1733	tags=40%, list=24%, signal=31%	Pfn1/Arpc3/Tmsb4x/Tmsb10/Arpc2/Cfl1/Arpc1b/Pycard/Arpc4/Rhoa/Brk1/Capza2/Arpc5/Rac1/Actr3/Coro1a/Dbnl/Arhgap18/Plek/Arpc5l/Capzb/Rdx/Hcls1/Lima1/Arpc1a/Dbn1/Cotl1/Grb2/Arf6/Dstn/Nckap1l/Gsn/Eps8/Cyfip1/Mtpn/Was	GO Biological Process
Dendritic	GO:0032271	regulation of protein polymerization	111	0.547617	1.34993	0.000572432	0.0381878	0.0357797	1682	tags=33%, list=23%, signal=26%	Rps3/Pfn1/Arpc3/Tmsb4x/Tmsb10/Arpc2/Cfl1/Arpc1b/Vdac2/Pycard/Arpc4/Rhoa/Stmn1/Capza2/Arpc5/Rac1/Actr3/Coro1a/Dbnl/Arhgap18/Arpc5l/Capzb/Rdx/Akap9/Hcls1/Arpc1a/Pak1/Dbn1/Mapre1/Cotl1/Grb2/Arf6/Nckap1l/Gsn/Eps8/Cyfip1/Mtpn	GO Biological Process
Dendritic	GO:0031625	ubiquitin protein ligase binding	220	0.49004	1.23456	0.00201642	0.0393201	0.0356075	1590	tags=30%, list=22%, signal=24%	Ubb/H2-Ab1/Uba52/Rpl11/Elob/Sumo2/Nedd8/Rpl23/Rbx1/Rps27a/Ifi205/Psma3/Atp6v0c/Gabarap/Rala/Rpl5/Actg1/Gabarapl2/Calr/Ubxn1/Hspa5/Slc25a5/Ube2l3/Cct2/Ubc/Ckb/Tubb5/Map1lc3b/Sumo1/Isg15/Lyn/Jun/Bag1/Tmbim6/Ube2n/Gpi1/Rtn4/Tpi1/Hsp90ab1/Spop/Prdx6/Nfkbia/Ube2k/Ube2a/Uqcrc1/Eif4e2/Tuba1b/Vcp/H13/Laptm5/Traf1/Pa2g4/Cul1/Ywhae/Trib1/Stx8/Ndufs2/Cd40/Nek6/Aup1/Bcl10/Ywhaz/Stub1/Ube2b/Ube2j2/Prkar1a	GO Molecular Function
Dendritic	GO:0016045	detection of bacterium	8	-0.700082	-1.98171	0.000722965	0.0397567	0.0372497	2199	tags=100%, list=30%, signal=70%	Naip6/Naip5/Naip2/Tlr2/Nod1/Tlr1/Pglyrp1	GO Biological Process
Dendritic	GO:0098543	detection of other organism	8	-0.700082	-1.98171	0.000722965	0.0397567	0.0372497	2199	tags=100%, list=30%, signal=70%	Naip6/Naip5/Naip2/Tlr2/Nod1/Tlr1/Pglyrp1	GO Biological Process
Dendritic	GO:0006735	NADH regeneration	13	0.786852	1.66871	0.000711478	0.0397567	0.0372497	1207	tags=62%, list=17%, signal=51%	Gapdh/Aldoa/Eno1/Pkm/Gpi1/Tpi1/Pgk1/Pfkp	GO Biological Process
Dendritic	GO:0061621	canonical glycolysis	13	0.786852	1.66871	0.000711478	0.0397567	0.0372497	1207	tags=62%, list=17%, signal=51%	Gapdh/Aldoa/Eno1/Pkm/Gpi1/Tpi1/Pgk1/Pfkp	GO Biological Process
Dendritic	GO:0061718	glucose catabolic process to pyruvate	13	0.786852	1.66871	0.000711478	0.0397567	0.0372497	1207	tags=62%, list=17%, signal=51%	Gapdh/Aldoa/Eno1/Pkm/Gpi1/Tpi1/Pgk1/Pfkp	GO Biological Process
Dendritic	GO:0019730	antimicrobial humoral response	26	0.683391	1.55143	0.000721133	0.0397567	0.0372497	726	tags=46%, list=10%, signal=42%	Cxcl9/Lgals3/Rpl39/Rnase6/Gapdh/Fau/Rpl30/Rps19/Wfdc17/Hmgn2/Slpi/B2m	GO Biological Process
Dendritic	GO:0034220	ion transmembrane transport	287	0.484435	1.22721	0.000709813	0.0397567	0.0372497	1998	tags=35%, list=27%, signal=26%	Cxcl9/Atox1/Cyba/Calm1/Atp5g1/Clic1/Fxyd5/Sri/Atp6v0e/Cfl1/Smdt1/Atp5g2/Atp5d/Ctss/Atp6v1g1/Slc25a4/Atp6v0c/Vdac2/Atp5b/Park7/Ndufa4/Xcr1/Rnasek/Atp6v1f/Mpc2/Bax/Itgb1/Ifngr1/Iscu/Hfe/Arf1/Mpc1/Slc25a5/Atp6v0b/Atp1a1/Slc25a3/Cd63/Arl6ip1/Atp1b1/Cybb/Calm2/Phb2/Sumo1/Cox17/Coro1a/Lyn/Dbi/Atp5g3/Tmbim6/Slc8b1/1810037I17Rik/Tmco1/Commd1/Slc25a11/Atp5a1/Tspan13/Itpr1/Vdac1/Akap9/Fyn/Orai1/Slc3a2/Nduf…	GO Biological Process
Dendritic	mmu04658	Th1 and Th2 cell differentiation - Mus musculus (house mouse)	52	0.579877	1.37289	0.00665537	0.0420202	0.0343414	1193	tags=25%, list=17%, signal=21%	H2-Eb1/H2-Ab1/H2-Aa/H2-DMb1/H2-DMa/Ifngr1/Fos/H2-DMb2/Jun/H2-Oa/Nfkbia/Rbpj/Il2rg	Kegg Pathway
Dendritic	mmu04814	Motor proteins - Mus musculus (house mouse)	63	0.553353	1.32614	0.00680409	0.042133	0.0344337	1690	tags=44%, list=24%, signal=34%	Actb/Myl12b/Myl6/Myl12a/Actg1/Tpm3/Capza2/Tubb5/Tubb2a/Dctn3/Dynlt1f/Tnni2/Tuba1c/Dctn2/Dynlrb1/Tuba1a/Capzb/Tubb4b/Tuba1b/Kif5b/Tpm4/Dynll1/Dynlt1a/Myo1g/Tubb2b/Kif2a/Actr10/Dync1i2	Kegg Pathway
Dendritic	GO:0046456	icosanoid biosynthetic process	15	0.764921	1.65694	0.000795378	0.0426173	0.0399299	172	tags=27%, list=2%, signal=26%	Fabp5/Cd74/Alox5ap/Mif	GO Biological Process
Dendritic	GO:2001188	regulation of T cell activation via T cell receptor contact with antigen bound to MHC molecule on antigen presenting cell	5	0.921697	1.64957	0.000794635	0.0426173	0.0399299	577	tags=100%, list=8%, signal=92%	Lgals3/H2-DMb1/Cd81/Havcr2/H2-DMb2	GO Biological Process
Dendritic	mmu04672	Intestinal immune network for IgA production - Mus musculus (house mouse)	25	0.659753	1.48636	0.00715875	0.0426874	0.0348867	673	tags=32%, list=9%, signal=29%	H2-Eb1/H2-Ab1/H2-Aa/H2-DMb1/H2-DMa/H2-DMb2/Cd86/H2-Oa	Kegg Pathway
Dendritic	mmu05034	Alcoholism - Mus musculus (house mouse)	52	0.578319	1.3692	0.00702717	0.0426874	0.0348867	1627	tags=38%, list=23%, signal=30%	H3f3b/H3f3a/Calm1/Gng5/Gng10/Gnai2/Gnas/Fosb/Calm2/Ppp1ca/Gnb1/Gnb2/Hras/Gng12/Gng2/Gngt2/Grb2/Kras/Calm3/Gnai3	Kegg Pathway
Dendritic	GO:0034115	negative regulation of heterotypic cell-cell adhesion	7	-0.758045	-1.99673	0.000852777	0.0441823	0.0413962	1775	tags=86%, list=24%, signal=65%	Map2k5/Mbp/Tnfaip3/Mapk7/Wnk1/Klf4	GO Biological Process
Dendritic	GO:0070587	regulation of cell-cell adhesion involved in gastrulation	7	-0.758045	-1.99673	0.000852777	0.0441823	0.0413962	1775	tags=86%, list=24%, signal=65%	Map2k5/Mbp/Tnfaip3/Mapk7/Wnk1/Klf4	GO Biological Process
Dendritic	GO:0032722	positive regulation of chemokine production	31	0.658972	1.5176	0.000866377	0.044519	0.0417117	559	tags=29%, list=8%, signal=27%	Cd74/Aif1/Hmgb1/Mif/Pycard/Selenok/Ccl5/Tlr3/Havcr2	GO Biological Process
Dendritic	GO:0031341	regulation of cell killing	56	0.599729	1.43175	0.000966438	0.0488597	0.0457787	1696	tags=46%, list=23%, signal=36%	Tyrobp/H2-D1/Cadm1/H2-T23/H2-M2/Dnase1l3/Spi1/Klrd1/Tap1/Lamp1/Havcr2/Klrk1/Pnp/B2m/Hsp90ab1/H2-M3/H2-K1/Stx7/Il7r/H2-Q4/H2-Q7/Tap2/Nckap1l/Gfer/Lag3/H2-T22	GO Biological Process

## Sheet: Macrophages_pathway
ClusterID	ID	Description	setSize	enrichmentScore	NES	pvalue	p.adjust	qvalue	rank	leading_edge	core_enrichment	PathwayDB
Macrophages	mmu03010	Ribosome - Mus musculus (house mouse)	108	-0.635777	-2.08279	1e-10	1.475e-08	1.16316e-08	717	tags=47%, list=18%, signal=40%	Rpl13/Rps4x/Rpl17/Rps10/Rpl7a/Rpl8/Rpl18a/Rpl27/Rpl27a/Rpl18/Rpl38/Rpl3/Rpl23/Rpl22/Rps13/Rpl13a/Rps26/Rpl30/Rplp1/Rpl31/Rpl41/Rps25/Rpl37/Rpl36a/Rps16/Rps27a/Rpl4/Fau/Rpl7/Rpsa/Rps20/Rps19/Rps17/Rps14/Rps29/Rps3a1/Rps23/Rps21/Rps24/Rps8/Rps28/Rps9/Rpl5/Rps12/Rpl35a/Rps6/Rps27/Rpl23a/Rps15/Rplp2/Rpl37a	Kegg Pathway
Macrophages	mmu05171	Coronavirus disease - COVID-19 - Mus musculus (house mouse)	129	-0.602018	-2.00193	1e-10	1.475e-08	1.16316e-08	731	tags=51%, list=19%, signal=43%	Tab2/Rpl13/Rps4x/Adam17/Jak1/Rpl17/Rps10/Rpl7a/Irak1/Rpl8/Rpl18a/Fos/Rpl27/Rpl27a/Rpl18/C1qa/Rpl38/Rpl3/Ikbkb/Rpl23/Rpl22/Rps13/Rpl13a/Rps26/Rpl30/Rplp1/Rpl31/Rpl41/Rps25/Rpl37/Rpl36a/Rps16/Rps27a/Rpl4/Fau/Stat1/Rpl7/Rpsa/Nfkbia/Rps20/Rps19/Rps17/Rps14/Rps29/Rps3a1/Stat3/Rps23/Rps21/Rps24/Rps8/Rps28/Rps9/Rpl5/Rps12/Rpl35a/Rps6/Prkcb/Nfkb1/Syk/Rps27/Rpl23a/Rps15/Cybb/Rplp2/Rpl37a/Il1b	Kegg Pathway
Macrophages	GO:0003735	structural constituent of ribosome	118	-0.611263	-2.011	1e-10	8.57e-08	7.51579e-08	735	tags=43%, list=18%, signal=36%	Rpl13/Rps4x/Rpl17/Rps10/Rpl7a/Rpl8/Rpl18a/Rpl27/Rpl27a/Rpl18/Rpl38/Rpl3/Rpl23/Rpl22/Rps13/Rpl13a/Rps26/Rpl30/Rplp1/Rpl31/Rpl41/Rps25/Rpl37/Rpl36a/Rps16/Rps27a/Rpl4/Fau/Rpl7/Rpsa/Rps20/Rps19/Rps17/Rps14/Rps29/Rps3a1/Rps23/Rps21/Rps24/Rps8/Rps28/Rps9/Rpl5/Rps12/Rpl35a/Rps6/Rps27/Rpl23a/Rps15/Rplp2/Rpl37a	GO Molecular Function
Macrophages	GO:0002181	cytoplasmic translation	114	-0.606292	-2.01102	1e-10	5.18e-07	4.43684e-07	661	tags=48%, list=16%, signal=41%	Rpl17/Rps10/Rpl7a/Rpl8/Rpl18a/Rpl27/Eif4b/Rpl27a/Rpl18/Rpl38/Rpl3/Rpl23/Rpl22/Rps13/Rpl13a/Pabpc1/Rps26/Rpl30/Rplp1/Rpl31/Syncrip/Rpl41/Csde1/Rps25/Rpl36a/Rps16/Rps27a/Rpl4/Hnrnpu/Fau/Rpl7/Rpsa/Rps20/Rps19/Eif3a/Rps17/Rps14/Rps29/Rps3a1/Rps23/Rps21/Rps24/Eef2/Rps8/Rps28/Eif4a2/Rps9/Rpl5/Rps12/Rpl35a/Rps6/Rpl23a/Rps15/Rplp2/Rpl37a	GO Biological Process
Macrophages	GO:0005102	signaling receptor binding	367	-0.446185	-1.59638	4.89802e-08	1.3992e-05	1.22708e-05	1077	tags=40%, list=27%, signal=32%	Sla/Taf4/Fes/Fbrs/Sh2b3/C3/Crk/Nr3c1/Il16/Tubb5/Picalm/Cflar/Ltb/Il17ra/Pcna/Nsmaf/Cul3/Sipa1l1/Pten/Utrn/Calm1/Il6ra/Ebi3/Ncoa3/Pilra/Copa/Myd88/Ncoa2/Atp2a2/Tgfbr2/Canx/Metrnl/Itch/Ighd/Itgb7/Traf1/Gnas/Cblb/Adam17/Crebbp/Flna/Tap2/Adrb1/Atp5a1/Jak1/Grb2/P4hb/Hdgf/Iglc3/Itgal/Irak1/Itga9/Ppp1r9b/Lyn/Klra17/Cdc42/Fyn/Gnai2/Bank1/Gna13/Asxl2/Pdia3/Iglc2/Msn/F11r/Vcp/Ikbkb/H2-Q4/Dock2/Tap1/Calr/Pi…	GO Molecular Function
Macrophages	GO:0003729	mRNA binding	172	-0.503403	-1.70926	3.40909e-07	7.30397e-05	6.4055e-05	905	tags=45%, list=23%, signal=36%	Sf1/Lsm14b/Lsm14a/Copa/Rpl26/Ssb/Tial1/Supt5/Larp1/Hnrnpa0/Luc7l3/Tia1/Ago2/Srsf6/Elavl1/Hnrnpk/Rbpms/Hnrnpl/Khdrbs1/Sf3b1/Mecp2/Nxf1/Ythdc1/Spen/Srsf1/Ddx3x/Larp4b/Rc3h2/Hnrnpr/Hnrnpc/Pum2/Srsf3/Cpsf6/G3bp2/Calr/Rps13/Hnrnpm/Rpl13a/Pabpc1/Rps26/Rpl30/Syncrip/Rpl41/Srsf5/Serbp1/Hnrnpu/Pcbp1/Zfp36l1/Hnrnpa3/Pcbp2/Rpl7/Marf1/Celf1/Fubp1/Purb/Tra2b/Eif3a/Rbm5/Rps14/Rps3a1/Tardbp/Eif4g2/Luc7l2/Rbms1/…	GO Molecular Function
Macrophages	GO:0016491	oxidoreductase activity	165	0.460197	2.09146	5.52197e-07	8.03791e-05	7.04915e-05	269	tags=23%, list=7%, signal=22%	Hba-a1/Hbb-bt/Vcam1/Blvrb/Hpgd/Hmox1/Txn1/Fth1/Etfb/Prdx1/Prxl2b/Cox5a/Cyb5a/Blvra/Cyba/Akr1a1/Prdx2/Ethe1/Dhrs1/Cox7b/Cox8a/Acadm/Selenow/Gpx4/Ndufa7/Hsd17b12/Mgst1/Ptgs1/Ndufs8/Tbxas1/Glrx5/Ndufb8/Txndc17/Sdhc/Por/Cox7a2/Hmox2/Vat1	GO Molecular Function
Macrophages	GO:0019904	protein domain specific binding	298	-0.445478	-1.57585	5.62748e-07	8.03791e-05	7.04915e-05	1082	tags=42%, list=27%, signal=33%	Pag1/Siglecg/Cct6a/Wipf1/Rhoa/Crk/Synj1/Tubb5/Cdc5l/Picalm/Strn3/Hhex/Cul3/Mical1/Pten/Stk11/Rps6kb1/Calm1/Dicer1/Adam10/Ncoa3/Lat2/Hif1a/Myd88/Chd8/Lbr/Capg/Ncoa2/Abi1/Hes1/Lamp2/Itpr1/Map3k5/Cnot1/Ncf1/Gnas/Cblb/Adam17/Crebbp/Atf4/Hnrnpk/Ezr/Eps15/Adrb1/Bcl2/Prkar1a/Sh3bp5/Grb2/Dynll1/Ikzf1/Khdrbs1/Mecp2/Lyn/Srsf1/Cdc42/Vasp/Ywhae/Fyn/F11r/Vcp/Hnrnpc/Mef2c/Hcls1/Hnrnpm/Skil/Usp47/Rack1/Hspa5/Gp…	GO Molecular Function
Macrophages	GO:0048002	antigen processing and presentation of peptide antigen	40	-0.707641	-2.11065	3.49494e-08	9.05191e-05	7.75326e-05	720	tags=60%, list=18%, signal=50%	H2-DMb1/Tap2/Fcer1g/Pdia3/H2-Q4/Tap1/Calr/H2-Ob/H2-Q6/H2-T23/H2-Q7/Tapbp/Ctss/B2m/H2-Eb1/Unc93b1/H2-Ab1/Pycard/H2-D1/H2-Aa/Clec4a1/Cd74/Clec4a3/H2-K1	GO Biological Process
Macrophages	mmu05140	Leishmaniasis - Mus musculus (house mouse)	47	-0.64531	-1.95505	1.25583e-06	0.00012349	9.73816e-05	326	tags=38%, list=8%, signal=36%	Ncf2/H2-Ob/Stat1/Nfkbia/Itga4/Itgb1/Itgb2/Ptpn6/Prkcb/Nfkb1/Eef1a1/H2-Eb1/Cybb/H2-Ab1/H2-Aa/Itgam/Il1b/Fcgr4	Kegg Pathway
Macrophages	mmu04514	Cell adhesion molecules - Mus musculus (house mouse)	41	-0.644144	-1.90725	8.81279e-06	0.000433296	0.000341689	729	tags=63%, list=18%, signal=52%	Itgb7/H2-DMb1/Itgal/Itga9/Glg1/F11r/H2-Q4/Vsir/H2-Ob/Spn/H2-Q6/Itga4/H2-T23/H2-Q7/Itgb1/Itgb2/Negr1/Pecam1/Selplg/H2-Eb1/H2-Ab1/H2-D1/H2-Aa/Itgam/Ptprc/H2-K1	Kegg Pathway
Macrophages	mmu04612	Antigen processing and presentation - Mus musculus (house mouse)	41	-0.643402	-1.90505	8.81279e-06	0.000433296	0.000341689	514	tags=54%, list=13%, signal=47%	Pdia3/Creb1/H2-Q4/Tap1/Calr/Hspa5/H2-Ob/H2-Q6/H2-T23/H2-Q7/Tapbp/Hsp90aa1/Ctss/B2m/Hsp90ab1/H2-Eb1/Hspa8/H2-Ab1/H2-D1/H2-Aa/Cd74/H2-K1	Kegg Pathway
Macrophages	mmu05168	Herpes simplex virus 1 infection - Mus musculus (house mouse)	99	-0.529775	-1.72379	5.90258e-06	0.000433296	0.000341689	731	tags=38%, list=19%, signal=32%	Tab2/Srsf6/H2-DMb1/Tap2/Bcl2/Jak1/Irak1/Nxf1/Srsf1/Pdia3/Ppp1ca/Ikbkb/H2-Q4/Srsf3/Tap1/Calr/Sp100/Srsf5/Srsf7/H2-Ob/Stat1/Nfkbia/H2-Q6/Srsf2/H2-T23/H2-Q7/Tapbp/B2m/Nfkb1/Syk/H2-Eb1/H2-Ab1/H2-D1/H2-Aa/Cd74/Pou2f2/Il1b/H2-K1	Kegg Pathway
Macrophages	mmu05169	Epstein-Barr virus infection - Mus musculus (house mouse)	112	-0.516286	-1.70174	1.06354e-05	0.000448207	0.000353448	803	tags=38%, list=20%, signal=31%	Hes1/Fcer2a/Gadd45b/Tab2/Sem1/H2-DMb1/Ccnd3/Tap2/Bcl2/Jak1/Rbpj/Itgal/Irak1/Lyn/Usp7/Ccnd1/Pdia3/Ikbkb/H2-Q4/Map3k14/Tap1/Calr/Cdk6/H2-Ob/Stat1/Nfkbia/H2-Q6/Cd19/Vim/H2-T23/Stat3/H2-Q7/Tapbp/Cr2/B2m/Nfkb1/Syk/H2-Eb1/H2-Ab1/H2-D1/H2-Aa/Ccnd2/H2-K1	Kegg Pathway
Macrophages	GO:0019900	kinase binding	288	-0.438715	-1.54969	4.50834e-06	0.000482956	0.000423547	1150	tags=44%, list=29%, signal=34%	Trp53/Pak2/Trim34a/Rhoh/Map3k11/Taok2/Tax1bp1/Stk38/Ccnt1/Mapre1/Cab39/Sh2b3/Rhoa/Crk/Twf2/Nr3c1/Cdc5l/Trim12a/Rbck1/Cyld/Kif5b/Pcna/Cdkn1b/Mical1/Sipa1l1/Ccnt2/Pten/Utrn/Calm1/Adam10/Ldha/Raf1/Hif1a/Midn/Dgkd/Tgfbr2/Hes1/Polr2a/Map3k5/Hnrnpa0/Mapkapk2/Cdk9/Cblb/Nin/Taok1/Ccnd3/Spag9/Elavl1/Atf4/Flna/Ezr/Prkar1a/Plek/Grb2/Pkn1/Khdrbs1/Tnip1/Irak1/Ppp1r9b/Map3k1/Rnd3/Srsf1/Cdc42/Bank1/Ppp1r12a/Arh…	GO Molecular Function
Macrophages	mmu05416	Viral myocarditis - Mus musculus (house mouse)	35	-0.651713	-1.89006	1.65219e-05	0.000609245	0.000480439	702	tags=51%, list=18%, signal=43%	H2-DMb1/Itgal/Fyn/Ccnd1/H2-Q4/Actg1/H2-Ob/Rac2/H2-Q6/H2-T23/Eif4g2/H2-Q7/Itgb2/H2-Eb1/H2-Ab1/H2-D1/H2-Aa/H2-K1	Kegg Pathway
Macrophages	GO:0050776	regulation of immune response	315	-0.443134	-1.57827	6.3686e-07	0.000668574	0.000572656	781	tags=34%, list=19%, signal=30%	Trim56/Nono/Mapkapk2/Ighd/Ncf1/Trafd1/Cblb/H2-DMb1/Irf1/Tap2/Malt1/Ezr/Bcl2/Sppl2a/Pkn1/Iglc3/Ankrd17/Khdrbs1/Tnip1/Irak1/Ifi204/Fcer1g/Lyn/Fyn/Ddx3x/Bcl6/Rc3h2/Matr3/Cd180/C1qa/Iglc2/Ifi203/Mef2c/H2-Q4/Pum2/Tap1/Slc15a4/Gpx1/Ptpn22/Smpdl3b/Vsir/Csk/Bcl2a1d/Ms4a1/Spn/Cd37/Ifi209/Mndal/Cd79a/Wnk1/App/Psen2/Ptprj/Nfkbia/Lilrb4a/Rac2/Rps19/Elf1/Ighg2b/H2-Q6/Samhd1/Cd19/Themis2/H2-T23/Spi1/Hmgb2/H2-Q…	GO Biological Process
Macrophages	GO:0098542	defense response to other organism	364	-0.428502	-1.53257	5.42829e-07	0.000668574	0.000572656	822	tags=33%, list=20%, signal=29%	Cd84/Ifitm6/Ciita/Map3k5/Sp110/Trim56/Nono/Itch/Ighd/Ncf1/Cybc1/Trafd1/Adam17/Irf1/Gbp7/Tap2/Malt1/Bcl2/Arhgef2/Rbpj/Setd2/Tnfaip8/Iglc3/Ankrd17/Irak1/Scd1/Ifi204/Fcer1g/Lyn/Slfn8/Acp5/Cdc42/Rab43/Fyn/Ddx3x/Dhx15/Matr3/Cd180/C1qa/Iglc2/Ifi203/Pum2/G3bp2/Map3k14/Tap1/Slc15a4/Rpl13a/Rpl30/Lcn2/Syncrip/Sp100/Rel/Evl/Ptpn22/Actg1/Smpdl3b/Ifit1bl1/Ptk2b/Fau/Spn/Cd37/Stat1/Ifi209/Hck/Pcbp2/Mndal/App/Rp…	GO Biological Process
Macrophages	GO:0051253	negative regulation of RNA metabolic process	424	-0.419787	-1.50608	9.03841e-07	0.000668842	0.000572885	1479	tags=53%, list=37%, signal=38%	Tgfb1/Nfe2l1/Abce1/Sik1/Tpr/Spop/Slc11a1/Atf7/Zfp451/Ppp2ca/Maz/U2af2/Lims1/Limd1/Phc2/Rbbp7/Notch2/Ldb1/Ctcf/Smad7/Jund/Rreb1/Pparg/Phf14/Hexim1/Sp3/Rsf1/Tgfbr1/Suz12/Rif1/Brd7/Npm1/Lcor/Pias1/Tle4/Mta2/Ilf3/Nfatc3/Cnbp/Mepce/Phf21a/Esrra/Elk4/Dnajb6/Smarca2/Prdm2/Jarid2/Nab1/Mdm4/Arid4b/Tmbim6/Yy1/Rest/Irf2bpl/Trp53/Pfdn5/Ppp3ca/Cux1/Nop53/Taf15/Cdc73/Noc2l/Cbx7/Hipk1/Rtf1/Nfic/Ccnt1/Thrap3/Elk…	GO Biological Process
Macrophages	mmu04940	Type I diabetes mellitus - Mus musculus (house mouse)	19	-0.747038	-1.97197	2.43794e-05	0.000799103	0.000630158	314	tags=53%, list=8%, signal=49%	H2-Ob/H2-Q6/H2-T23/H2-Q7/H2-Eb1/H2-Ab1/H2-D1/H2-Aa/Il1b/H2-K1	Kegg Pathway
Macrophages	mmu05332	Graft-versus-host disease - Mus musculus (house mouse)	18	-0.757881	-1.97436	2.85952e-05	0.00084356	0.000665216	314	tags=56%, list=8%, signal=51%	H2-Ob/H2-Q6/H2-T23/H2-Q7/H2-Eb1/H2-Ab1/H2-D1/H2-Aa/Il1b/H2-K1	Kegg Pathway
Macrophages	GO:0002523	leukocyte migration involved in inflammatory response	7	-0.936754	-1.99387	2.12292e-06	0.000917672	0.000786017	149	tags=57%, list=4%, signal=55%	Itgb2/S100a9/S100a8/Itgam	GO Biological Process
Macrophages	GO:0010628	positive regulation of gene expression	391	-0.4194	-1.50323	2.12588e-06	0.000917672	0.000786017	997	tags=38%, list=25%, signal=31%	Bcl3/Batf/Ltb/Serp1/Stat6/Riok3/Il17ra/Nsd2/Pten/Rps6kb1/Dicer1/Il6ra/Ncoa3/Hif1a/Eif3e/Pde4b/Kat6a/Myd88/Peli1/Rpl26/Gimap3/S100a10/Hes1/Cd84/Polr2a/Ptges3/Setx/Larp1/Trim56/Hnrnpa0/Mapkapk2/Mbp/Ighd/Ago2/Adam17/Crebbp/Irf1/Elavl1/Atf4/Hnrnpk/Malt1/Ezr/Arhgef2/Hnrnpl/Rbpj/Setd2/Il2rg/Tut4/Ikzf1/Khdrbs1/Mecp2/Irak1/Ifi204/Fcer1g/Srsf1/Ddx3x/Larp4b/Atf3/Slc38a2/Rock1/Creb1/Msn/Chil3/Nfat5/Mef2c/Ro…	GO Biological Process
Macrophages	mmu05150	Staphylococcus aureus infection - Mus musculus (house mouse)	22	-0.721262	-1.94509	3.4354e-05	0.000921313	0.00072653	139	tags=45%, list=4%, signal=44%	H2-Ob/Itgb2/Fpr2/Selplg/H2-Eb1/Camp/H2-Ab1/H2-Aa/Itgam/Fcgr4	Kegg Pathway
Macrophages	GO:0019825	oxygen binding	6	0.97243	2.50376	9.94074e-06	0.000946579	0.000830139	4	tags=33%, list=0%, signal=33%	Hba-a1/Hbb-bt	GO Molecular Function
Macrophages	GO:0001775	cell activation	406	-0.417202	-1.49683	2.92091e-06	0.00108074	0.000925687	997	tags=39%, list=25%, signal=32%	Bcl3/Batf/Cast/Stat6/Hhex/Il17ra/Satb1/Gimap1/Nsd2/Pten/Irf2bp2/Stk11/Tbc1d10c/Dicer1/Adam10/Il6ra/Ebi3/Slamf9/Lat2/Cd48/Dock8/Myd88/Peli1/Apbb1ip/Sirpb1c/Gimap3/Lfng/Tgfbr2/Hes1/Cd84/Wdfy4/Itch/Ighd/Sbno2/Gnas/Cblb/H2-DMb1/Adam17/Ccnd3/Irf1/Flna/Malt1/Bcl2/Prkar1a/Itpkb/Plek/Crtc3/Rbpj/Pkn1/Il2rg/Iglc3/Itgal/Ikzf1/Fcer1g/Lyn/Lmo4/Fyn/Zbtb7a/Tcf4/Bank1/Bcl6/Gna13/Rc3h2/Cd180/C1qa/Iglc2/Msn/F11r/S…	GO Biological Process
Macrophages	GO:0009890	negative regulation of biosynthetic process	489	-0.402749	-1.45509	2.87768e-06	0.00108074	0.000925687	1444	tags=49%, list=36%, signal=36%	Atf7/Zfp451/Pid1/Cnot6/Ppp2ca/Maz/Lims1/Pan3/Limd1/Abca7/Phc2/Rbbp7/Notch2/Ireb2/Ldb1/Ctcf/Smad7/Jund/Rreb1/Pparg/Phf14/Hexim1/Sp3/Rsf1/Khsrp/Paip2/Tgfbr1/Suz12/Rif1/Brd7/Pum1/Lcor/Pias1/Tle4/Mta2/Ilf3/Itm2c/Nfatc3/Cnbp/Mepce/Phf21a/Esrra/Elk4/Dnajb6/Smarca2/Eif4ebp2/Prdm2/Jarid2/Nab1/Mdm4/Arid4b/Tmbim6/Yy1/Rest/Irf2bpl/Trp53/Pfdn5/Cux1/Nop53/Cdc73/Noc2l/Cbx7/Hipk1/Rtf1/Nfic/Elk3/Rhoa/Btg2/Nr3c1/…	GO Biological Process
Macrophages	mmu05144	Malaria - Mus musculus (house mouse)	18	0.829936	2.61431	4.67872e-05	0.00111366	0.000878213	16	tags=33%, list=0%, signal=33%	Hbb-bs/Hba-a1/Hba-a2/Hbb-bt/Vcam1/Il18	Kegg Pathway
Macrophages	mmu04640	Hematopoietic cell lineage - Mus musculus (house mouse)	30	-0.653556	-1.85211	4.90766e-05	0.00111366	0.000878213	316	tags=40%, list=8%, signal=37%	Ms4a1/H2-Ob/Cd37/Cd19/Itga4/Cr2/H2-Eb1/Csf2ra/H2-Ab1/H2-Aa/Itgam/Il1b	Kegg Pathway
Macrophages	GO:0031327	negative regulation of cellular biosynthetic process	473	-0.404304	-1.45822	3.46702e-06	0.00119728	0.00102551	1479	tags=51%, list=37%, signal=37%	Tgfb1/Nfe2l1/Sik1/Tpr/Spop/Atf7/Zfp451/Pid1/Cnot6/Ppp2ca/Maz/Lims1/Pan3/Limd1/Abca7/Phc2/Rbbp7/Notch2/Ireb2/Ldb1/Ctcf/Smad7/Jund/Rreb1/Pparg/Phf14/Hexim1/Sp3/Rsf1/Khsrp/Paip2/Tgfbr1/Suz12/Rif1/Brd7/Pum1/Lcor/Pias1/Tle4/Mta2/Ilf3/Itm2c/Nfatc3/Cnbp/Mepce/Phf21a/Esrra/Elk4/Dnajb6/Smarca2/Eif4ebp2/Prdm2/Jarid2/Nab1/Mdm4/Arid4b/Tmbim6/Yy1/Rest/Irf2bpl/Trp53/Pfdn5/Cux1/Nop53/Cdc73/Noc2l/Cbx7/Hipk1/Rtf1…	GO Biological Process
Macrophages	GO:0140104	molecular carrier activity	25	0.804958	2.52839	1.48173e-05	0.00126984	0.00111363	29	tags=12%, list=1%, signal=12%	Hba-a1/Hbb-bt/Trf	GO Molecular Function
Macrophages	GO:0030183	B cell differentiation	79	-0.56114	-1.79386	3.99363e-06	0.00129294	0.00110744	713	tags=46%, list=18%, signal=38%	Adam17/Malt1/Bcl2/Rbpj/Il2rg/Ikzf1/Zbtb7a/Bcl6/Tcirg1/Ikzf3/Ep300/Ms4a1/Ptk2b/Tpd52/Zfp36l1/Cd79a/Ptprj/Lilrb4a/Cd19/Hdac7/Spi1/Cd79b/Cr2/Bcl11a/Xbp1/Cmtm7/Ptpn6/Dock10/Syk/Foxp1/Zfp36l2/Laptm5/H2-Ab1/Ighm/Ptprc/Pou2f2	GO Biological Process
Macrophages	GO:0045321	leukocyte activation	378	-0.416816	-1.49141	4.89311e-06	0.00140813	0.00120611	978	tags=38%, list=24%, signal=32%	Stat6/Hhex/Satb1/Gimap1/Nsd2/Pten/Irf2bp2/Stk11/Tbc1d10c/Dicer1/Adam10/Il6ra/Ebi3/Slamf9/Lat2/Cd48/Dock8/Myd88/Peli1/Apbb1ip/Sirpb1c/Gimap3/Lfng/Tgfbr2/Hes1/Cd84/Wdfy4/Itch/Ighd/Sbno2/Cblb/H2-DMb1/Adam17/Ccnd3/Irf1/Malt1/Bcl2/Prkar1a/Itpkb/Crtc3/Rbpj/Pkn1/Il2rg/Iglc3/Itgal/Ikzf1/Fcer1g/Lyn/Fyn/Zbtb7a/Bank1/Bcl6/Rc3h2/Cd180/C1qa/Iglc2/Msn/Swap70/Sirpb1a/Mef2c/Dock2/Rpl22/Slc15a4/Tcirg1/Cdk6/Ikzf3/…	GO Biological Process
Macrophages	GO:0046906	tetrapyrrole binding	22	0.821186	2.38865	2.50891e-05	0.00149491	0.00131102	64	tags=36%, list=2%, signal=36%	Hba-a1/Hbb-bt/Hmox1/Prdx1/Hebp1/Cyb5a/Slc48a1/Cyba	GO Molecular Function
Macrophages	GO:0042605	peptide antigen binding	13	-0.806923	-2.00671	2.61654e-05	0.00149491	0.00131102	501	tags=77%, list=12%, signal=68%	H2-Q4/Tap1/H2-Q6/H2-T23/H2-Q7/H2-Eb1/H2-Ab1/H2-D1/H2-Aa/H2-K1	GO Molecular Function
Macrophages	GO:0001067	transcription regulatory region nucleic acid binding	267	-0.430746	-1.51344	2.59139e-05	0.00149491	0.00131102	1587	tags=60%, list=40%, signal=39%	Irf5/Mybbp1a/Zfp280d/Tbl1xr1/Zbtb18/Usf1/Kdm6b/Elf4/Nfkb2/Zfp710/Zfp950/Tcf20/Tef/Nfe2l1/Spib/Nfya/Atf7/Taf1/Maz/Tfe3/Actn4/Foxj2/Mlxip/Ireb2/Ctcf/Jund/Rreb1/Pparg/Sp3/Suz12/Brd7/Npm1/Nfatc3/Irf7/Chd7/Esrra/Elk4/Smarca2/Prdm2/Zfp362/Klf6/Arid4b/Stat5b/Vezf1/Ncoa1/Yy1/Rest/Top1/Trp53/Cux1/Hivep2/Zfp644/Zfp871/Taf4/Nfic/Ccnt1/Thrap3/Elk3/Nr3c1/Cdc5l/Usf2/Srebf2/Batf/Mga/Stat6/Hhex/Satb1/Baz2a/Zfp21…	GO Molecular Function
Macrophages	GO:0000976	transcription cis-regulatory region binding	263	-0.427095	-1.49694	2.36722e-05	0.00149491	0.00131102	1587	tags=60%, list=40%, signal=39%	Irf5/Mybbp1a/Zfp280d/Tbl1xr1/Zbtb18/Usf1/Kdm6b/Elf4/Nfkb2/Zfp710/Zfp950/Tcf20/Tef/Nfe2l1/Spib/Nfya/Atf7/Taf1/Maz/Tfe3/Actn4/Foxj2/Mlxip/Ctcf/Jund/Rreb1/Pparg/Sp3/Suz12/Brd7/Npm1/Nfatc3/Irf7/Chd7/Esrra/Elk4/Smarca2/Prdm2/Zfp362/Klf6/Arid4b/Stat5b/Vezf1/Ncoa1/Yy1/Rest/Top1/Trp53/Cux1/Hivep2/Zfp644/Zfp871/Taf4/Nfic/Ccnt1/Thrap3/Elk3/Nr3c1/Cdc5l/Usf2/Srebf2/Batf/Mga/Stat6/Hhex/Satb1/Baz2a/Zfp217/Bbx/…	GO Molecular Function
Macrophages	GO:0050839	cell adhesion molecule binding	72	-0.548232	-1.74379	3.36731e-05	0.00169752	0.00148871	748	tags=47%, list=19%, signal=39%	Itgb7/Adam17/Ezr/P4hb/Itgal/Itga9/Lyn/Msn/F11r/Ppp1ca/Calr/Nisch/Pirb/Pxn/Fermt3/Myh9/Rpsa/Fxyd5/App/Ptprj/Lilrb4a/P2rx4/Itga4/Itgb1/Lcp1/Cd47/Itgb2/Ptpn6/Syk/Tgfbi/Itgax/Tln1/Itgam/Il1b	GO Molecular Function
Macrophages	mmu05143	African trypanosomiasis - Mus musculus (house mouse)	11	0.893885	2.69022	8.11292e-05	0.00170951	0.00134809	16	tags=55%, list=0%, signal=54%	Hbb-bs/Hba-a1/Hba-a2/Hbb-bt/Vcam1/Il18	Kegg Pathway
Macrophages	GO:0010558	negative regulation of macromolecule biosynthetic process	458	-0.403096	-1.45115	7.04467e-06	0.00182457	0.0015628	1479	tags=51%, list=37%, signal=36%	Tgfb1/Nfe2l1/Sik1/Tpr/Spop/Atf7/Zfp451/Cnot6/Ppp2ca/Maz/Lims1/Pan3/Limd1/Abca7/Phc2/Rbbp7/Notch2/Ireb2/Ldb1/Ctcf/Smad7/Jund/Rreb1/Pparg/Phf14/Hexim1/Sp3/Rsf1/Khsrp/Paip2/Tgfbr1/Suz12/Rif1/Brd7/Pum1/Lcor/Pias1/Tle4/Mta2/Ilf3/Itm2c/Nfatc3/Cnbp/Mepce/Phf21a/Esrra/Elk4/Dnajb6/Smarca2/Eif4ebp2/Prdm2/Jarid2/Nab1/Mdm4/Arid4b/Tmbim6/Yy1/Rest/Irf2bpl/Trp53/Pfdn5/Cux1/Nop53/Cdc73/Noc2l/Cbx7/Hipk1/Rtf1/Nfic…	GO Biological Process
Macrophages	mmu05166	Human T-cell leukemia virus 1 infection - Mus musculus (house mouse)	107	-0.485157	-1.59003	0.000116667	0.00229445	0.00180936	702	tags=34%, list=18%, signal=28%	H2-DMb1/Ccnd3/Crebbp/Atf4/Jak1/Crtc3/Il2rg/Itgal/Map3k1/Fos/Ccnd1/Creb1/Ikbkb/H2-Q4/Xiap/Map3k14/Calr/Ep300/Ets1/H2-Ob/Nfkbia/H2-Q6/H2-T23/Spi1/H2-Q7/Zfp36/Itgb2/B2m/Nfkb1/H2-Eb1/Tln1/H2-Ab1/H2-D1/H2-Aa/Ccnd2/H2-K1	Kegg Pathway
Macrophages	GO:0040011	locomotion	352	-0.41575	-1.48525	1.17875e-05	0.00234843	0.00201151	722	tags=30%, list=18%, signal=27%	Stk24/Adam17/Spag9/Ccar1/Flna/Bcl2/Atp5a1/Arhgef2/Rufy3/Pkn1/Mecp2/Itga9/Map3k1/Fcer1g/Lyn/Ablim1/Lmo4/Acp5/Vasp/Gnai2/Gna13/Arhgdia/Rock1/Creb1/Msn/Swap70/Mef2c/Rock2/Dock2/Ssh2/Calr/Rpl13a/Lsp1/Mia3/Nisch/Rack1/Cnn2/Hspa5/Gpi1/Lcn2/Cited2/Sp100/Ep300/Evl/Krit1/Ptpn22/Actg1/Zmynd8/Sorl1/Ets1/Vsir/Slk/Nipbl/Abi3/Fermt3/Ptk2b/Spn/Arpc2/Wnk1/App/Psen2/Ptprj/Mycbp2/Rac2/Fubp1/Rps19/P2rx4/Hdac7/Prkcd…	GO Biological Process
Macrophages	GO:0002252	immune effector process	247	-0.438953	-1.54474	1.28672e-05	0.0024686	0.00211443	776	tags=35%, list=19%, signal=30%	Il21r/Mapkapk2/Ighd/Ncf1/Cybc1/Sbno2/H2-DMb1/Irf1/Tap2/Malt1/Pkn1/Iglc3/Ankrd17/Itgal/Fcer1g/Lyn/Acp5/Bcl6/Rc3h2/Cd180/C1qa/Iglc2/Swap70/H2-Q4/Dock2/Tap1/Slc15a4/Tcirg1/Gpi1/Pirb/Ptpn22/Vsir/H2-Ob/Ptk2b/Spn/Cd37/Ywhaz/App/Psen2/Ptprj/Lilrb4a/Rac2/Rps19/Ighg2b/H2-Q6/Cd244a/Cd19/Prkcd/Kmt2e/H2-T23/Stat3/Spi1/H2-Q7/Cr2/Lcp1/Xbp1/Cebpb/Cd47/Itgb2/Fgr/Ptpn6/Dock10/Rps6/B2m/Syk/H2-Eb1/Foxp1/Ctsh/Unc93b…	GO Biological Process
Macrophages	GO:0001906	cell killing	71	-0.559625	-1.77013	1.38479e-05	0.00256187	0.00219433	252	tags=28%, list=6%, signal=27%	Rps19/H2-Q6/H2-T23/Spi1/H2-Q7/Ptpn6/B2m/Hsp90ab1/Syk/Ctsh/Coro1a/Stap1/Ltf/Hspa8/H2-D1/Clec2d/Itgam/Ptprc/H2-K1/Lyz2	GO Biological Process
Macrophages	GO:0009888	tissue development	439	-0.397194	-1.42599	1.78574e-05	0.00280307	0.00240092	1417	tags=48%, list=35%, signal=35%	Prkacb/Wls/Foxj2/Spred1/Ppp3cb/Stim1/Arrb2/Notch2/Ldb1/Smad7/Rnf220/Cacybp/Cplane1/Rreb1/Pparg/Tgfbr1/Plec/Hectd1/Kras/Ctsz/Pik3cd/Clasp2/Sos1/Nfatc3/Zfand5/S1pr1/Chd7/Esrra/Anxa6/Ripor2/Sav1/Akna/Camk2d/Rapgef1/Jarid2/Heg1/Nab1/Itgav/Mdm4/Slc4a7/Arid4b/Stat5b/Vezf1/Ncoa1/Yy1/Rest/Trp53/Sgpp1/Ppp3ca/Cux1/Cdc73/Rtf1/Abcb1b/C3/Rhoa/Btg2/Nr3c1/Pbxip1/Tubb5/Usp19/Ugcg/Cflar/Stat6/Hhex/Satb1/Cdkn1b/Cc…	GO Biological Process
Macrophages	GO:0009967	positive regulation of signal transduction	452	-0.396098	-1.4244	1.78215e-05	0.00280307	0.00240092	914	tags=34%, list=23%, signal=30%	Calm1/Arfgef1/Il6ra/Ncoa3/Lsm14a/Raf1/Mgat5/Hif1a/Myd88/Peli1/Dgkd/Rpl26/Tnks2/Ncoa2/Nupr1/Lfng/Tgfbr2/Hes1/Cd84/Csnk2a1/Tial1/Kmt2d/Map3k5/Specc1l/Trim56/Ralbp1/Gadd45b/Tab2/Traf1/Gnas/Madd/Taok1/Adam17/Akr1b3/Crebbp/Spag9/Flna/Adrb1/Itpkb/Jak1/Rbpms/Rbpj/Ankrd17/Itgal/Irak1/Fgd2/Map3k1/Lyn/Rnf111/Cdc42/Crlf3/Fyn/Ddx3x/Dhx15/Gnai2/Bank1/Rc3h2/Brd4/Atf3/Pafah1b1/Asxl2/Cd180/Rock1/Pdia3/F11r/Vcp/P…	GO Biological Process
Macrophages	GO:0001912	positive regulation of leukocyte mediated cytotoxicity	27	-0.706396	-1.98893	1.84223e-05	0.00280669	0.00240403	235	tags=41%, list=6%, signal=39%	H2-Q6/H2-T23/Spi1/H2-Q7/B2m/Stap1/Hspa8/H2-D1/Itgam/Ptprc/H2-K1	GO Biological Process
Macrophages	GO:0140110	transcription regulator activity	382	-0.401489	-1.43938	7.97677e-05	0.00284837	0.00249799	1590	tags=56%, list=40%, signal=37%	Hipk2/Irf5/Mybbp1a/Elf2/Zfp280d/Tbl1xr1/Zbtb18/Usf1/Sirt7/Elf4/Nfkb2/Zfp710/Zmiz2/Zfp950/Ctnnb1/Tcf20/Tef/Nfe2l1/Spib/Nfya/Lmo2/Atf7/Zfp451/Cnot6/Maz/Tfe3/Actn4/Foxj2/Mlxip/Limd1/Gpbp1/Ldb1/Ctcf/Trim5/Jund/Rreb1/Pparg/Sp3/Rsf1/Crebl2/Psip1/Brd7/Parp14/Npm1/Lcor/Pias1/Tle4/Mta2/Birc2/Nfatc3/Irf7/Esrra/Elk4/Smarca2/Prdm2/Zfp362/Klf6/Nab1/Stat5b/Vezf1/Ncoa1/Yy1/Rest/Irf2bpl/Trp53/Cux1/Taf15/Helz2/No…	GO Molecular Function
Macrophages	mmu04145	Phagosome - Mus musculus (house mouse)	86	-0.512936	-1.64424	0.000174862	0.00303437	0.00239285	519	tags=30%, list=13%, signal=27%	Atp6ap1/H2-Q4/Tap1/Calr/Atp6v0b/Tcirg1/Actg1/Ncf2/H2-Ob/Dync1h1/H2-Q6/H2-T23/H2-Q7/Itgb1/Itgb2/Tuba1b/Ctss/H2-Eb1/Coro1a/Cybb/H2-Ab1/H2-D1/H2-Aa/Itgam/H2-K1/Fcgr4	Kegg Pathway
Macrophages	mmu05163	Human cytomegalovirus infection - Mus musculus (house mouse)	105	-0.488136	-1.59369	0.000166449	0.00303437	0.00239285	909	tags=43%, list=23%, signal=34%	Adcy7/Rps6kb1/Calm1/Il6ra/Raf1/Itpr1/Gnas/Atf4/Tap2/Jak1/Grb2/Gnb1/Itpr2/Gnb2/Gnai2/Gna13/Ccnd1/Rock1/Pdia3/Creb1/Ikbkb/H2-Q4/Rock2/Tap1/Calr/Cdk6/Pxn/Ptk2b/Arhgef1/Nfkbia/Rac2/Akap13/H2-Q6/H2-T23/Stat3/H2-Q7/Tapbp/Gngt2/Prkcb/B2m/Nfkb1/Il10ra/H2-D1/Il1b/H2-K1	Kegg Pathway
Macrophages	mmu05134	Legionellosis - Mus musculus (house mouse)	33	-0.616622	-1.77739	0.000189732	0.0031095	0.0024521	256	tags=30%, list=6%, signal=29%	Nfkbia/Eef1g/Clk1/Itgb2/Nfkb1/Eef1a1/Hspa8/Pycard/Itgam/Il1b	Kegg Pathway
Macrophages	GO:0009607	response to biotic stimulus	485	-0.391761	-1.41465	2.19871e-05	0.00325409	0.00278724	797	tags=32%, list=20%, signal=30%	Wdfy4/Map3k5/Sp110/Trim56/Nono/Hnrnpa0/Mapkapk2/Itch/Ighd/Ncf1/Cybc1/Trafd1/Sbno2/Tab2/Adam17/Crebbp/Irf1/Gbp7/Tap2/Malt1/Bcl2/Arhgef2/Rbpj/Setd2/Psmb9/Tnfaip8/Iglc3/Tut4/Ankrd17/Mecp2/Tnip1/Irak1/Scd1/Ppp1r15b/Ifi204/Fcer1g/Lyn/Slfn8/Acp5/Cdc42/Rab43/Fyn/Ddx3x/Dhx15/Bank1/Gas5/Matr3/Cd180/C1qa/Iglc2/Ifi203/Mef2c/Pum2/G3bp2/Map3k14/Tap1/Slc15a4/Rpl13a/Resf1/Hspa5/Rpl30/Lcn2/Gpx1/Txnip/Syncrip/Sp1…	GO Biological Process
Macrophages	mmu05320	Autoimmune thyroid disease - Mus musculus (house mouse)	17	-0.729498	-1.88008	0.000235682	0.00331077	0.00261082	314	tags=59%, list=8%, signal=54%	H2-Q4/H2-Ob/H2-Q6/H2-T23/H2-Q7/H2-Eb1/H2-Ab1/H2-D1/H2-Aa/H2-K1	Kegg Pathway
Macrophages	mmu05330	Allograft rejection - Mus musculus (house mouse)	17	-0.729498	-1.88008	0.000235682	0.00331077	0.00261082	314	tags=59%, list=8%, signal=54%	H2-Q4/H2-Ob/H2-Q6/H2-T23/H2-Q7/H2-Eb1/H2-Ab1/H2-D1/H2-Aa/H2-K1	Kegg Pathway
Macrophages	mmu04613	Neutrophil extracellular trap formation - Mus musculus (house mouse)	53	-0.563641	-1.73536	0.000217808	0.00331077	0.00261082	356	tags=26%, list=9%, signal=24%	Actg1/Ncf2/Rac2/Hdac7/Itgb2/Prkcb/Fpr2/Nfkb1/Selplg/Syk/Camp/Cybb/Itgam/Fcgr4	Kegg Pathway
Macrophages	GO:0042274	ribosomal small subunit biogenesis	30	-0.68105	-1.95828	2.78326e-05	0.00360433	0.00308723	522	tags=47%, list=13%, signal=41%	Rpl38/Rps25/Rps16/Rpsa/Rps19/Rps17/Rps14/Rps21/Rps24/Rps8/Rps28/Rps6/Rps27/Rps15	GO Biological Process
Macrophages	GO:0001916	positive regulation of T cell mediated cytotoxicity	14	-0.797607	-1.99731	2.99496e-05	0.00360789	0.00309028	235	tags=57%, list=6%, signal=54%	H2-Q6/H2-T23/H2-Q7/B2m/Hspa8/H2-D1/Ptprc/H2-K1	GO Biological Process
Macrophages	GO:0034097	response to cytokine	311	-0.422524	-1.50372	3.23697e-05	0.00381079	0.00326407	991	tags=37%, list=25%, signal=30%	Ugcg/Kif5b/Mga/Stat6/Il17ra/Stip1/Ubtf/Actr3/Rps6kb1/Adam10/Socs3/Il6ra/Ebi3/Lsm14a/Hif1a/Dock8/Myd88/Capg/Ifitm6/Ciita/Trim56/Il21r/Mapkapk2/Cdk9/Csf3r/Sbno2/Traf1/Adam17/Irf1/Gbp7/Bcl2/Jak1/P4hb/Setd2/Hdgf/Il2rg/Tut4/Etv3/Irak1/Smarca5/Ifi204/Fcer1g/Srsf1/Acp5/Cdc42/Rab43/Pafah1b1/Pdia3/Creb1/Ifi203/Rpl3/Nfat5/Ikbkb/Hcls1/Srsf3/Rpl13a/Tcirg1/Tank/Lsp1/Hspa5/Syncrip/Sp100/Pirb/Rel/Bclaf1/Rps16/E…	GO Biological Process
Macrophages	GO:0031343	positive regulation of cell killing	32	-0.663686	-1.92618	4.01302e-05	0.00451901	0.00387069	235	tags=38%, list=6%, signal=36%	H2-Q6/H2-T23/Spi1/H2-Q7/B2m/Syk/Stap1/Hspa8/H2-D1/Itgam/Ptprc/H2-K1	GO Biological Process
Macrophages	mmu04657	IL-17 signaling pathway - Mus musculus (house mouse)	30	-0.622094	-1.76295	0.000354457	0.00475295	0.00374809	731	tags=50%, list=19%, signal=41%	Tab2/Elavl1/Fos/Srsf1/Ikbkb/Lcn2/Nfkbia/Cebpb/Hsp90aa1/Hsp90b1/Nfkb1/Hsp90ab1/S100a9/S100a8/Il1b	Kegg Pathway
Macrophages	mmu05152	Tuberculosis - Mus musculus (house mouse)	89	-0.496852	-1.59781	0.000414012	0.0050889	0.00401301	702	tags=35%, list=18%, signal=29%	H2-DMb1/Crebbp/Malt1/Bcl2/Jak1/Irak1/Fcer1g/Atp6ap1/Creb1/Atp6v0b/Tcirg1/Lsp1/Ep300/H2-Ob/Stat1/Cebpb/Itgb2/Ctss/Nfkb1/Il10ra/Syk/H2-Eb1/Coro1a/Camp/Itgax/H2-Ab1/H2-Aa/Cd74/Itgam/Il1b/Fcgr4	Kegg Pathway
Macrophages	mmu05203	Viral carcinogenesis - Mus musculus (house mouse)	96	-0.490689	-1.59045	0.000412683	0.0050889	0.00401301	753	tags=39%, list=19%, signal=32%	Mapkapk2/Traf1/Ccnd3/Crebbp/Atf4/Hnrnpk/Jak1/Grb2/Rbpj/Lyn/Cdc42/Chd4/Ywhae/Ddx3x/Usp7/Ccnd1/Creb1/H2-Q4/Ube3a/Cdk6/Sp100/Rel/Ep300/Pxn/Ywhaz/Nfkbia/H2-Q6/Hdac7/Ywhab/H2-T23/Stat3/H2-Q7/Nfkb1/Syk/H2-D1/Ccnd2/H2-K1	Kegg Pathway
Macrophages	GO:0002699	positive regulation of immune effector process	105	-0.506963	-1.66257	5.89005e-05	0.0061021	0.00522665	306	tags=28%, list=8%, signal=26%	Cd37/Ptprj/Lilrb4a/Rac2/Rps19/Ighg2b/H2-Q6/Cd244a/H2-T23/Spi1/H2-Q7/Xbp1/Itgb2/Fgr/Ptpn6/B2m/Syk/Foxp1/Stap1/Laptm5/Nfkbiz/Hspa8/Pycard/H2-D1/Cd74/Itgam/Ptprc/Il1b/H2-K1	GO Biological Process
Macrophages	GO:0034645	cellular macromolecule biosynthetic process	425	-0.393136	-1.40993	6.64569e-05	0.00649522	0.00556337	932	tags=31%, list=23%, signal=27%	Tm9sf2/Tet3/Rps6kb1/Arfgef1/Tnrc6c/Trip11/Lsm14b/Soat1/Lsm14a/Mgat5/Rpl12/Hif1a/Eif3e/Rpl26/Eif3f/Rpn2/Itm2b/Lars2/Ptges3/Larp1/Mrpl52/Cnot1/B4galt5/Tia1/Plod3/Ago2/Rpl13/Rps4x/Elavl1/Bcl2/Cnot6l/Hnrnpl/Rpl17/Tut4/Rps10/Khdrbs1/Rpl7a/Tnip1/Ppp1r15b/Lyn/Rpl8/Rpl18a/Rpl27/Eif4b/Ddx3x/Larp4b/Bank1/Rpl27a/Rc3h2/Rpl18/Hnrnpr/Rock1/Rpl38/Rpl3/Ppp1ca/Pum2/Rock2/Eef1b2/Rpl23/Rpl22/Slc35c2/Calr/Rps13/Rpl1…	GO Biological Process
Macrophages	GO:0050764	regulation of phagocytosis	57	-0.563464	-1.74898	8.18697e-05	0.0074802	0.00640704	512	tags=40%, list=13%, signal=36%	Il2rg/Fcer1g/Sirpb1a/Dock2/Calr/Rack1/Cnn2/Pot1b/Csk/Hck/Siglece/Ptprj/Ighg2b/Cd300lf/Cd47/Fgr/Sod1/Syk/Stap1/Hspa8/Pycard/Ptprc/Il1b	GO Biological Process
Macrophages	GO:0071345	cellular response to cytokine stimulus	281	-0.416535	-1.47398	8.23607e-05	0.0074802	0.00640704	991	tags=37%, list=25%, signal=30%	Ugcg/Kif5b/Mga/Stat6/Il17ra/Stip1/Ubtf/Actr3/Rps6kb1/Socs3/Il6ra/Ebi3/Lsm14a/Hif1a/Dock8/Myd88/Capg/Ifitm6/Trim56/Il21r/Cdk9/Csf3r/Sbno2/Traf1/Adam17/Irf1/Gbp7/Jak1/P4hb/Hdgf/Il2rg/Tut4/Etv3/Irak1/Smarca5/Ifi204/Fcer1g/Srsf1/Cdc42/Rab43/Pafah1b1/Pdia3/Creb1/Ifi203/Rpl3/Nfat5/Ikbkb/Hcls1/Srsf3/Rpl13a/Tcirg1/Tank/Lsp1/Hspa5/Syncrip/Pirb/Bclaf1/Rps16/Evl/Actg1/Srsf7/Hnrnpu/Ptk2b/Stat1/Ifi209/Zfp36l1…	GO Biological Process
Macrophages	GO:0033627	cell adhesion mediated by integrin	27	-0.676795	-1.90559	8.91793e-05	0.00754543	0.00646291	748	tags=56%, list=19%, signal=46%	Itgb7/Adam17/Itgal/Itga9/Lyn/Swap70/Fermt3/Wnk1/Itga4/Itgb1/Itgb2/Ptpn6/Syk/Itgax/Itgam	GO Biological Process
Macrophages	GO:0002250	adaptive immune response	173	-0.453464	-1.56031	9.03121e-05	0.00754543	0.00646291	997	tags=42%, list=25%, signal=33%	Bcl3/Batf/Stat6/Il17ra/Nsd2/Adcy7/Il6ra/Lat2/Cd48/Myd88/Gimap3/Cd84/Fcer2a/Il21r/Ighd/H2-DMb1/Adam17/Irf1/Tap2/Malt1/Pkn1/Iglc3/Fcer1g/Lyn/Fyn/Bcl6/Rc3h2/C1qa/Iglc2/Swap70/Mef2c/H2-Q4/Tap1/Slc15a4/Tcirg1/Pirb/Vsir/Csk/H2-Ob/Ptk2b/Spn/Cd79a/Lilrb4a/Ighg2b/H2-Q6/Cd244a/Cd19/Prkcd/H2-T23/Stat3/H2-Q7/Cd79b/Samsn1/Cr2/Ptpn6/Prkcb/B2m/Syk/H2-Eb1/Ctsh/Unc93b1/Nfkbiz/Hspa8/H2-Ab1/Pycard/H2-D1/H2-Aa/Ighm/…	GO Biological Process
Macrophages	GO:0051240	positive regulation of multicellular organismal process	467	-0.386622	-1.39283	9.3345e-05	0.00767503	0.00657392	1057	tags=36%, list=26%, signal=30%	C3/Inpp5d/Rhoa/Synj1/Twf2/Nr3c1/Il16/Caprin1/Cyld/Bcl3/Picalm/Batf/Ltb/Serp1/Stat6/Riok3/Il17ra/Nsd2/Stk11/Actr3/Dicer1/Il6ra/Zfp516/Ncoa3/Arid4a/Hif1a/Pde4b/Myd88/Peli1/Ncoa2/Gimap3/Anxa2/Tgfbr2/Hes1/Cd84/Trim56/Mapkapk2/Itch/Mbp/Cdk9/B4galt5/Ighd/Ago2/Gnas/Cblb/Nin/Adam17/Irf1/Atf4/Malt1/Ezr/Adrb1/Bcl2/Itpkb/Arhgef2/Jak1/Rufy3/Rbpj/Setd2/Golga4/Il2rg/Tut4/Ikzf1/Mecp2/Irak1/Scd1/Ifi204/Fcer1g/Ly…	GO Biological Process
Macrophages	GO:0001913	T cell mediated cytotoxicity	20	-0.727672	-1.94965	0.0001	0.00809375	0.00693256	235	tags=45%, list=6%, signal=43%	H2-Q6/H2-T23/H2-Q7/B2m/Ctsh/Hspa8/H2-D1/Ptprc/H2-K1	GO Biological Process
Macrophages	GO:0071889	14-3-3 protein binding	20	-0.691841	-1.85975	0.00035069	0.0085869	0.00753061	549	tags=50%, list=14%, signal=43%	Ppp1r12a/H2-Q4/Zfp36l1/H2-Q6/Hdac7/H2-T23/H2-Q7/Zfp36/H2-D1/H2-K1	GO Molecular Function
Macrophages	GO:0030593	neutrophil chemotaxis	33	-0.64258	-1.86825	0.000115458	0.0088597	0.00758863	260	tags=27%, list=6%, signal=26%	Rac2/Itgb2/Syk/S100a9/Ccl6/S100a8/Cd74/Itgam/Il1b	GO Biological Process
Macrophages	GO:0032635	interleukin-6 production	71	-0.531214	-1.68026	0.000119726	0.0088597	0.00758863	370	tags=30%, list=9%, signal=27%	Ptpn22/Csk/App/Psen2/Lilrb4a/Ash1l/Stat3/Grk2/Xbp1/Cebpb/Cd47/Ptpn6/Syk/Zbtb20/Unc93b1/Laptm5/Klf2/Pycard/Cd74/Pou2f2/Il1b	GO Biological Process
Macrophages	GO:0032675	regulation of interleukin-6 production	67	-0.537928	-1.69373	0.000142609	0.0099826	0.00855043	370	tags=28%, list=9%, signal=26%	Ptpn22/Csk/App/Lilrb4a/Stat3/Grk2/Xbp1/Cebpb/Cd47/Ptpn6/Syk/Zbtb20/Unc93b1/Laptm5/Klf2/Pycard/Cd74/Pou2f2/Il1b	GO Biological Process
Macrophages	GO:0046977	TAP binding	11	-0.784025	-1.88193	0.000477176	0.0102235	0.00896589	697	tags=82%, list=17%, signal=68%	Tap2/H2-Q4/Tap1/H2-Q6/H2-T23/H2-Q7/Tapbp/H2-D1/H2-K1	GO Molecular Function
Macrophages	GO:0046978	TAP1 binding	11	-0.784025	-1.88193	0.000477176	0.0102235	0.00896589	697	tags=82%, list=17%, signal=68%	Tap2/H2-Q4/Tap1/H2-Q6/H2-T23/H2-Q7/Tapbp/H2-D1/H2-K1	GO Molecular Function
Macrophages	GO:0046979	TAP2 binding	11	-0.784025	-1.88193	0.000477176	0.0102235	0.00896589	697	tags=82%, list=17%, signal=68%	Tap2/H2-Q4/Tap1/H2-Q6/H2-T23/H2-Q7/Tapbp/H2-D1/H2-K1	GO Molecular Function
Macrophages	GO:0098772	molecular function regulator activity	474	-0.375763	-1.35072	0.000490984	0.0102628	0.00900033	1197	tags=38%, list=30%, signal=30%	Camk2d/Ppp4r3a/Rapgef1/Rasal3/Ppp1r12c/Rab5c/Dennd6a/Usp6nl/Tmbim6/Trp53/Pak2/Stx7/Gpsm3/Hsph1/Rhoh/Psmd2/Rab10/Atp1b3/Arhgef3/Fbrs/Ccnt1/Birc3/Cab39/C3/Rhoa/Il16/Dock11/Gmip/Eid1/Ppp4r2/Pik3r5/Cflar/Ltb/Cast/Itsn2/Arhgap9/Pcna/Cdkn1b/Nsmaf/Ppp4c/Sipa1l1/Ccnt2/Stk11/Psme1/Aup1/Gdi2/Tbc1d10c/Calm1/Arfgef1/Socs3/Ebi3/Birc6/Raf1/Mgat5/Tor1aip1/Copa/Dock8/Nupr1/Anxa2/Abi1/Csnk2a1/Ralgps2/Acap1/Mob1a/…	GO Molecular Function
Macrophages	GO:0030334	regulation of cell migration	273	-0.416437	-1.47343	0.000163252	0.0109707	0.00939673	736	tags=31%, list=18%, signal=27%	Ago2/Stk24/Adam17/Spag9/Ccar1/Flna/Bcl2/Atp5a1/Arhgef2/Rufy3/Mecp2/Map3k1/Lyn/Lmo4/Acp5/Gnai2/Gna13/Arhgdia/Rock1/Msn/Swap70/Mef2c/Rock2/Ssh2/Calr/Mia3/Nisch/Rack1/Cnn2/Hspa5/Gpi1/Lcn2/Cited2/Sp100/Evl/Krit1/Ptpn22/Actg1/Zmynd8/Sorl1/Ets1/Vsir/Slk/Nipbl/Abi3/Fermt3/Ptk2b/Spn/Arpc2/Wnk1/App/Ptprj/Rac2/Fubp1/P2rx4/Hdac7/Gcnt1/Itga4/Vim/Stat3/Spi1/Itgb1/Nfe2l2/Macf1/Xbp1/Ogt/Cd47/Cpne3/Fgr/Dock10/Ar…	GO Biological Process
Macrophages	GO:0006396	RNA processing	375	-0.397544	-1.42298	0.000167313	0.0109707	0.00939673	1156	tags=37%, list=29%, signal=29%	Tmbim6/Rest/Trp53/Ivns1abp/Ppp3ca/Nop53/Taf15/Cdc73/Slbp/Hnrnph3/Clk4/Akap8l/Ccnt1/Thrap3/Zfp638/Tgs1/Rps27rt/Srsf10/Supt20/Papola/Cdc5l/Rnf20/Ppp4r2/Fip1l1/Riok3/Ptbp3/Safb/Trmt1l/Dicer1/Sf1/Rpl26/Ssb/Snrpb/Sf3b3/Rbm27/Hnrnph2/Rbm6/Polr2a/Supt5/Prpf4b/Setx/Zc3h13/Nono/Sltm/Cdk9/Luc7l3/Tia1/Ago2/Srsf6/Sf3b2/Hnrnpk/Cnot6l/Hnrnpl/Acin1/Tut4/Khdrbs1/Rpl7a/Sf3b1/Mecp2/Hnrnpf/Mbnl2/Ythdc1/Srsf1/Rpl27/…	GO Biological Process
Macrophages	GO:0043395	heparan sulfate proteoglycan binding	6	-0.879405	-1.82221	0.000586806	0.0119736	0.0105007	271	tags=50%, list=7%, signal=47%	App/Itgam/Ptprc	GO Molecular Function
Macrophages	mmu04151	PI3K-Akt signaling pathway - Mus musculus (house mouse)	97	-0.479138	-1.55504	0.00107522	0.0124635	0.00982849	932	tags=45%, list=24%, signal=36%	Cdkn1b/Pkn2/Pten/Stk11/Rps6kb1/Il6ra/Raf1/Csf3r/Ppp2r5c/Itgb7/Ccnd3/Atf4/Bcl2/Jak1/Grb2/Gnb1/Pkn1/Il2rg/Itga9/Eif4b/Gnb2/Ywhae/Ccnd1/Ppp2r5a/Creb1/Ikbkb/Lpar6/Cdk6/Ywhaz/Cd19/Ywhab/Itga4/Itgb1/Gngt2/Nr4a1/Mcl1/Hsp90aa1/Hsp90b1/Rps6/Nfkb1/Hsp90ab1/Syk/Pik3ap1/Ccnd2	Kegg Pathway
Macrophages	mmu05165	Human papillomavirus infection - Mus musculus (house mouse)	108	-0.460413	-1.5083	0.00109848	0.0124635	0.00982849	932	tags=40%, list=24%, signal=31%	Cdkn1b/Pten/Rps6kb1/Atp6v1a/Raf1/Maml3/Lfng/Hes1/Ppp2r5c/Itgb7/Gnas/Ccnd3/Crebbp/Irf1/Jak1/Grb2/Rbpj/Itga9/Cdc42/Chd4/Ccnd1/Atp6ap1/Ppp2r5a/Creb1/Ikbkb/H2-Q4/Ube3a/Atp6v0b/Tcirg1/Cdk6/Ep300/Pxn/Stat1/H2-Q6/Itga4/H2-T23/H2-Q7/Itgb1/Nfkb1/Tcf7l2/H2-D1/Ccnd2/H2-K1	Kegg Pathway
Macrophages	GO:0033993	response to lipid	242	-0.419285	-1.47623	0.000216856	0.0133728	0.0114542	1045	tags=40%, list=26%, signal=31%	Rhoa/Akap8/Synj1/Twf2/Nr3c1/Trim12a/Cflar/Strn3/Pcna/Safb/Stk11/Rps6kb1/Ncoa3/Pde4b/Myd88/Peli1/Ncoa2/Tgfbr2/Cd84/Kmt2d/Ptges3/Setx/Hnrnpa0/Mapkapk2/Cnot1/Mbp/Abcg1/Sbno2/Tab2/Gnas/Adam17/Hnrnpk/Malt1/Bcl2/Tut4/Tnip1/Irak1/Scd1/Lyn/Acp5/Zbtb7a/Cd180/Pdia3/Creb1/Msn/Mef2c/Safb2/Rock2/Ube3a/Calr/Rpl13a/Sp100/Ep300/Ptpn22/Ncf2/Hnrnpu/Lbh/Ncor1/Ptk2b/Mtdh/Stat1/Zfp36l1/Atp1a1/Nfkbia/Lilrb4a/Ly86/Akap…	GO Biological Process
Macrophages	GO:0007010	cytoskeleton organization	364	-0.391046	-1.39861	0.000228774	0.0139418	0.0119416	1542	tags=52%, list=38%, signal=35%	Rhoq/Ccdc88c/Nedd9/Arpc5/Abr/Cd2ap/Pik3ca/Xpo1/Ctnnb1/Ppp2r1a/Tgfb1/Tlr2/Pdcd6ip/Tpr/Tspan32/Msrb1/Rictor/Map7d1/Actn4/Sun2/Bicd2/Limd1/Notch2/Atxn7/Flii/Tgfbr1/Smc1a/Plec/Eml4/Kras/Npm1/Uvrag/Pik3r1/Ccdc88b/Clasp2/Marcksl1/Dock7/Cotl1/Myo1g/S1pr1/Ripor2/Arap1/Dnajb6/Diaph1/Cyfip1/Myo1c/Pak2/Hsph1/Rhoh/Taok2/Capza1/Brwd1/Fes/Wipf1/Mapre1/Rhoa/Crk/Mark3/Twf2/Senp6/Tubb5/Cyfip2/Cyld/Tpm4/Cflar/Cdkn…	GO Biological Process
Macrophages	mmu04650	Natural killer cell mediated cytotoxicity - Mus musculus (house mouse)	50	-0.530321	-1.61954	0.00131758	0.0143958	0.0113523	306	tags=24%, list=8%, signal=22%	Ptk2b/Rac2/Cd244a/H2-T23/Lcp2/Itgb2/Ptpn6/Prkcb/Syk/H2-D1/H2-K1/Fcgr4	Kegg Pathway
Macrophages	GO:0030881	beta-2-microglobulin binding	10	-0.79436	-1.87253	0.000735842	0.0146655	0.0128615	501	tags=60%, list=12%, signal=53%	H2-Q4/H2-Q6/H2-T23/H2-Q7/H2-D1/H2-K1	GO Molecular Function
Macrophages	GO:0055105	ubiquitin-protein transferase inhibitor activity	7	-0.852394	-1.83165	0.000789191	0.0150297	0.0131809	478	tags=71%, list=12%, signal=63%	Rpl23/Rpl37/Rps20/Rpl5/Rps15	GO Molecular Function
Macrophages	GO:1990948	ubiquitin ligase inhibitor activity	7	-0.852394	-1.83165	0.000789191	0.0150297	0.0131809	478	tags=71%, list=12%, signal=63%	Rpl23/Rpl37/Rps20/Rpl5/Rps15	GO Molecular Function
Macrophages	GO:0007229	integrin-mediated signaling pathway	37	-0.606538	-1.78705	0.000256403	0.0153319	0.0131323	748	tags=49%, list=19%, signal=40%	Itgb7/Flna/Plek/Itgal/Itga9/Fcer1g/Cdc42/Pxn/Fermt3/Ptk2b/Itga4/Itgb1/Itgb2/Fgr/Syk/Itgax/Tln1/Itgam	GO Biological Process
Macrophages	GO:0042255	ribosome assembly	27	-0.649069	-1.82752	0.000270809	0.0153366	0.0131363	562	tags=41%, list=14%, signal=35%	Ddx3x/Rpl38/Rps25/Rpsa/Rps19/Rps14/Rps28/Rpl5/Rps27/Rpl23a/Rps15	GO Biological Process
Macrophages	GO:0019079	viral genome replication	53	-0.557647	-1.72206	0.000265886	0.0153366	0.0131363	947	tags=43%, list=24%, signal=34%	Pkn2/Dicer1/Ifitm6/Larp1/Bcl2/Ifi204/Cdc42/Ddx3x/Vcp/Rock2/Tasor/Pabpc1/Resf1/Pcbp1/Pcbp2/Ifitm2/Grk2/Fam111a/Apobec3/Ltf/Ddx5/Hspa8/Ifitm3	GO Biological Process
Macrophages	GO:0001909	leukocyte mediated cytotoxicity	54	-0.555871	-1.71811	0.000275348	0.0153366	0.0131363	235	tags=28%, list=6%, signal=27%	H2-Q6/H2-T23/Spi1/H2-Q7/Ptpn6/B2m/Ctsh/Coro1a/Stap1/Hspa8/H2-D1/Clec2d/Itgam/Ptprc/H2-K1	GO Biological Process
Macrophages	GO:0051094	positive regulation of developmental process	388	-0.394145	-1.41193	0.00026792	0.0153366	0.0131363	1171	tags=40%, list=29%, signal=32%	Cyfip1/Arid4b/Slc6a6/Stat5b/Vezf1/Ncoa1/Rest/Cd83/Ppp3ca/Cux1/Rhoh/Rab7b/Fes/C3/Inpp5d/Rhoa/Crk/Synj1/Twf2/Nr3c1/Caprin1/Cyld/Picalm/Serp1/Itsn2/Stat6/Nsd2/Pten/Stk11/Actr3/Rps6kb1/Dicer1/Socs3/Ncoa3/Arid4a/Hif1a/Ncoa2/Gimap3/Ehd1/S100a10/Tgfbr2/Hes1/Suco/Map3k5/Metrnl/Ralbp1/B4galt5/Ago2/Gnas/Stk24/Nin/Crebbp/Spag9/Irf1/Atf4/Flna/Hnrnpk/Malt1/Ezr/Adrb1/Bcl2/Itpkb/Arhgef2/Jak1/Rufy3/P4hb/Rbpj/Gol…	GO Biological Process
Macrophages	GO:0010629	negative regulation of gene expression	366	-0.390928	-1.39857	0.000267652	0.0153366	0.0131363	1164	tags=40%, list=29%, signal=32%	Gtpbp2/Ilrun/Tmbim6/Yy1/Rest/Cd83/Trp53/Zc3hav1/Ppp3ca/Taf15/Helz2/Siglecg/Thrap3/Inpp5d/Srsf10/Ggnbp2/Btg2/Akap8/Ubr2/Caprin1/Bcl3/Picalm/Cast/Baz2a/Ptbp3/Adcy7/Zfp445/Dicer1/Tnrc6c/Adam10/Lsm14a/Hif1a/Eif3e/Myd88/Ssb/Gimap3/Kcnq1ot1/Hes1/Cd84/Tial1/Kmt2d/Larp1/Hnrnpa0/Mapkapk2/Cnot1/Tia1/Ago2/Gnas/Srsf6/Crebbp/Elavl1/Hnrnpk/Ezr/Prkar1a/Cnot6l/Hnrnpl/Acin1/Tut4/Mecp2/Smarca5/Glg1/Srsf1/Zfp148/Ac…	GO Biological Process
Macrophages	GO:0000380	alternative mRNA splicing, via spliceosome	49	-0.568359	-1.74129	0.000290589	0.0160133	0.0137159	751	tags=43%, list=19%, signal=35%	Tia1/Srsf6/Hnrnpl/Khdrbs1/Mbnl2/Ythdc1/Srsf1/Zbtb7a/Hnrnpm/Hnrnpu/Celf1/Tra2b/Rbm5/Srsf2/Rbm25/Celf2/Ddx17/Sfpq/Mbnl1/Ddx5/Malat1	GO Biological Process
Macrophages	GO:2000026	regulation of multicellular organismal development	404	-0.382759	-1.37319	0.000295399	0.016107	0.0137962	1317	tags=44%, list=33%, signal=33%	Brd7/Kras/Hk2/C1qc/Pik3r1/Pik3cd/Il4ra/H2-DMa/Clasp2/Dock7/Sos1/S1pr1/Chd7/Esrra/Rab21/Smarca2/Nptn/Ist1/Ubash3b/Sav1/Jarid2/Cers2/Cyfip1/Stat5b/Vezf1/Yy1/Rest/Cd83/Trp53/Sgpp1/Ppp3ca/Cux1/Rhoh/Cdc73/Rab7b/Zzz3/Fes/Sh2b3/C3/Inpp5d/Rhoa/Synj1/Twf2/Nr3c1/Caprin1/Cyld/Picalm/Hhex/Cdkn1b/Pten/Stk11/Actr3/Dicer1/Adam10/Ncoa3/Hif1a/Kat6a/Gimap3/Nupr1/Anxa2/S100a10/Tgfbr2/Hes1/Mbp/B4galt5/Csf3r/Ino80d/K…	GO Biological Process
Macrophages	GO:0051241	negative regulation of multicellular organismal process	285	-0.406927	-1.44124	0.000323202	0.0167997	0.0143895	956	tags=35%, list=24%, signal=28%	Nrd1/Oga/Cdkn1b/Pten/Stk11/Adcy7/Actr3/Tle3/Dicer1/Arid4a/Hif1a/Pde4b/Gimap3/Anxa2/Atp2a2/Tgfbr2/Hes1/Cd84/Mbp/Ncf1/Tia1/Gnas/Srsf6/Adam17/Crebbp/Irf1/Atf4/Hnrnpk/Ezr/Adrb1/Bcl2/Arhgef2/Rufy3/Tmem176b/Rbpj/Mecp2/Lyn/Acp5/Tcf4/Gnai2/Bank1/Bcl6/Rc3h2/Rock1/Hook3/Mef2c/Rock2/Calr/Cdk6/Cited2/Sp100/Rel/Evl/Krit1/Ptpn22/Sorl1/Tob2/Vsir/Csk/Ptk2b/Stat1/Atp1a1/Wnk1/App/Srgn/Rgs2/Lilrb4a/Rps19/P2rx4/Hdac…	GO Biological Process
Macrophages	GO:0010976	positive regulation of neuron projection development	65	-0.530057	-1.66251	0.000340886	0.0169788	0.0145429	1213	tags=54%, list=30%, signal=38%	Nptn/Rapgef1/Cyfip1/Fes/Twf2/Caprin1/Cflar/Actr3/Ehd1/Setx/Itpr1/Stk24/Adam17/Flna/Hnrnpk/Lyn/Fyn/Pafah1b1/Ikbkb/Tmem30a/Hspa5/Ep300/Ptk2b/Mark2/Rgs2/Actr2/Itgb1/Nfe2l2/Bcl11a/Negr1/Clip1/Eef1a1/Iqgap1/Grn/S100a9	GO Biological Process
Macrophages	GO:0005178	integrin binding	44	-0.569708	-1.72325	0.000939426	0.0175019	0.015349	748	tags=55%, list=19%, signal=45%	Itgb7/Adam17/P4hb/Itgal/Itga9/Lyn/F11r/Calr/Nisch/Pxn/Fermt3/Myh9/App/Lilrb4a/Itga4/Itgb1/Lcp1/Itgb2/Syk/Tgfbi/Itgax/Tln1/Itgam/Il1b	GO Molecular Function
Macrophages	GO:0040012	regulation of locomotion	291	-0.401145	-1.42368	0.000354935	0.0175101	0.014998	736	tags=30%, list=18%, signal=26%	Ago2/Stk24/Adam17/Spag9/Ccar1/Flna/Bcl2/Atp5a1/Arhgef2/Rufy3/Pkn1/Mecp2/Map3k1/Lyn/Lmo4/Acp5/Gnai2/Gna13/Arhgdia/Rock1/Msn/Swap70/Mef2c/Rock2/Ssh2/Calr/Mia3/Nisch/Rack1/Cnn2/Hspa5/Gpi1/Lcn2/Cited2/Sp100/Evl/Krit1/Ptpn22/Actg1/Zmynd8/Sorl1/Ets1/Vsir/Slk/Nipbl/Abi3/Fermt3/Ptk2b/Spn/Arpc2/Wnk1/App/Ptprj/Mycbp2/Rac2/Fubp1/P2rx4/Hdac7/Gcnt1/Itga4/Vim/Stat3/Spi1/Itgb1/Nfe2l2/Macf1/Xbp1/Ogt/Cd47/Cpne3/F…	GO Biological Process
Macrophages	GO:0045595	regulation of cell differentiation	454	-0.375199	-1.34993	0.000432357	0.0201767	0.017282	1479	tags=48%, list=37%, signal=34%	Tgfb1/Nfe2l1/Ptpra/Ociad1/Tlr2/Sik1/Card11/Lmo2/Ppp2ca/Tfe3/Actn4/Lims1/Foxj2/Spred1/Rnf6/Limd1/Rbbp7/Arrb2/Notch2/Ldb1/Smad7/Jund/Rreb1/Pparg/Crebl2/Tgfbr1/Suz12/Brd7/Kras/C1qc/Pik3r1/Mta2/Il4ra/H2-DMa/Clasp2/Dock7/Sos1/Nfatc3/Med28/Chd7/Esrra/Ripor2/Rab21/Smarca2/Nptn/Ist1/Ubash3b/Sav1/Cers2/Itgav/Cyfip1/Slc6a6/Stat5b/Vezf1/Ncoa1/Yy1/Rest/Cd83/Trp53/Sgpp1/Ppp3ca/Cux1/Rhoh/Cdc73/Rab7b/Fes/Sh2b3/…	GO Biological Process
Macrophages	GO:0000028	ribosomal small subunit assembly	11	-0.790857	-1.88363	0.000501868	0.0228042	0.0195325	522	tags=73%, list=13%, signal=63%	Rpl38/Rps25/Rpsa/Rps19/Rps14/Rps28/Rps27/Rps15	GO Biological Process
Macrophages	GO:0043085	positive regulation of catalytic activity	350	-0.387625	-1.38444	0.000520077	0.0234261	0.0200652	1059	tags=34%, list=26%, signal=27%	Cab39/Camkk2/Rhoa/Crk/Dock11/Cct4/Cyfip2/Gmip/Picalm/Pik3r5/Cflar/Pcna/Cdkn1b/Sipa1l1/Pten/Stk11/Adcy7/Psme1/Tbc1d10c/Calm1/Il6ra/Raf1/Dock8/S100a10/Abi1/Tgfbr2/Fcer2a/Ralgps2/Ptges3/Map3k5/Zfp91/Atp2a3/Ralbp1/Mbp/Tab2/Gnas/Adam17/Ccnd3/Malt1/Adrb1/Bcl2/Anp32b/Plek/Irak1/Fgd2/Ppp1r15b/Map3k1/Ifi204/Lyn/Lmo4/Cdc42/Fyn/Ddx3x/Gnai2/Gna13/Ppp1r12a/Ccnd1/Rock1/F11r/Vcp/Snx18/Mef2c/Rock2/Sipa1/Tank/Rac…	GO Biological Process
Macrophages	GO:0014002	astrocyte development	11	-0.788074	-1.877	0.00054396	0.024083	0.0206279	271	tags=64%, list=7%, signal=60%	C1qa/App/Vim/Grn/S100a9/S100a8/Il1b	GO Biological Process
Macrophages	GO:0031344	regulation of cell projection organization	194	-0.423678	-1.4711	0.000558342	0.0243043	0.0208175	1228	tags=43%, list=31%, signal=31%	Ripor2/Rab21/Arap1/Nptn/Ist1/Rapgef1/Cers2/Cyfip1/Pak2/Ppp3ca/Cux1/Fes/Rhoa/Crk/Twf2/Dock11/Caprin1/Cyld/Picalm/Cflar/Sipa1l1/Pten/Stk11/Actr3/Gdi2/Adam10/Ehd1/Hes1/Setx/Itpr1/Mbp/Stk24/Nin/Adam17/Flna/Hnrnpk/Ezr/Rufy3/Golga4/Dynll1/Lyn/Cdc42/Fyn/Pafah1b1/Ikbkb/Ube3a/Tmem30a/Skil/Hspa5/Lcn2/Dleu2/Ep300/Evl/Zmynd8/Abi3/Rpl4/Ptk2b/Arpc2/Mark2/App/Mycbp2/Rgs2/Rac2/Capzb/Prkcd/Vim/Actr2/Itgb1/Nfe2l2/…	GO Biological Process
Macrophages	GO:1903209	positive regulation of oxidative stress-induced cell death	13	-0.761175	-1.87778	0.000563138	0.0243088	0.0208213	271	tags=46%, list=7%, signal=43%	App/Mcl1/Sfpq/Sod1/Foxp1/Itgam	GO Biological Process
Macrophages	GO:0034405	response to fluid shear stress	11	-0.784306	-1.86803	0.000617895	0.0260219	0.0222886	506	tags=73%, list=13%, signal=64%	Mef2c/Cited2/Ptk2b/Mtss1/P2rx4/Nfe2l2/Xbp1/Klf2	GO Biological Process
Macrophages	GO:0008201	heparin binding	17	-0.68916	-1.78934	0.00147288	0.026297	0.0230622	647	tags=41%, list=16%, signal=35%	Hdgf/Rpl22/Zfp207/App/Ltf/Itgam/Ptprc	GO Molecular Function
Macrophages	GO:0030029	actin filament-based process	235	-0.408998	-1.44169	0.000652217	0.0270279	0.0231503	1566	tags=57%, list=39%, signal=37%	Bin1/Arf6/Rhoq/Ccdc88c/Nedd9/Arpc5/Abr/Cd2ap/Pik3ca/Myo9b/Tgfb1/Tlr2/Pdcd6ip/Msrb1/Rictor/Actn4/Sun2/Notch2/Flii/Tgfbr1/Plec/Kras/Pik3r1/Clasp2/Marcksl1/Cotl1/Myo1g/S1pr1/Arap1/Dnajb6/Camk2d/Diaph1/Cyfip1/Myo1c/Pak2/Rhoh/Taok2/Capza1/Fes/Wipf1/Rhoa/Crk/Twf2/Cyfip2/Tpm4/Cflar/Cul3/Mical1/Sipa1l1/Utrn/Actr3/Arfgef1/Pde4b/Capg/Fchsd2/Atp2a2/S100a10/Abi1/Cap1/Specc1l/Taok1/Myl6/Flna/Ezr/Akap9/Adrb1/B…	GO Biological Process
Macrophages	GO:0023026	MHC class II protein complex binding	10	-0.771537	-1.81873	0.0015885	0.0277826	0.024365	326	tags=60%, list=8%, signal=55%	H2-Ob/B2m/H2-Eb1/H2-Ab1/H2-Aa/Cd74	GO Molecular Function
Macrophages	GO:0070169	positive regulation of biomineral tissue development	14	-0.737222	-1.8461	0.000701637	0.0279575	0.0239465	700	tags=50%, list=17%, signal=41%	Atf4/Asxl2/Mef2c/Mia3/Tent5a/Cebpb/Atp2b1	GO Biological Process
Macrophages	GO:0110151	positive regulation of biomineralization	14	-0.737222	-1.8461	0.000701637	0.0279575	0.0239465	700	tags=50%, list=17%, signal=41%	Atf4/Asxl2/Mef2c/Mia3/Tent5a/Cebpb/Atp2b1	GO Biological Process
Macrophages	GO:0043313	regulation of neutrophil degranulation	5	-0.895687	-1.7388	0.000680625	0.0279575	0.0239465	201	tags=80%, list=5%, signal=76%	Spi1/Itgb2/Syk/Itgam	GO Biological Process
Macrophages	GO:0071826	ribonucleoprotein complex subunit organization	91	-0.481415	-1.55591	0.000697246	0.0279575	0.0239465	1138	tags=44%, list=28%, signal=32%	Nop53/Cdc73/Rps5/Srsf10/Kif5b/Rpl6/Dicer1/Snrpb/Ptges3/Setx/Luc7l3/Ago2/Srsf6/Sf3b1/Ythdc1/Srsf1/Eif4b/Rpl38/Vcp/Cpsf6/Scaf11/Rpl13a/Rps25/Ddx39b/Rpsa/Celf1/Rps19/Eif3a/Rbm5/Rps14/Luc7l2/Celf2/Rps28/Hsp90aa1/Rpl5/Hsp90ab1/Rps27/Rpl23a/Mbnl1/Rps15	GO Biological Process
Macrophages	GO:0043405	regulation of MAP kinase activity	61	-0.522977	-1.63256	0.000724571	0.0285421	0.0244472	628	tags=34%, list=16%, signal=29%	Irak1/Fgd2/Map3k1/Lyn/Ptpn22/Sorl1/Csk/Ptk2b/App/Ptprj/Rgs2/Ptpn1/Akap13/Prkcd/Dnaja1/Ptpn6/Syk/Iqgap1/Zeb2/Ptprc/Il1b	GO Biological Process
Macrophages	GO:0043488	regulation of mRNA stability	72	-0.509083	-1.61395	0.00077386	0.0290885	0.0249152	912	tags=49%, list=23%, signal=38%	Dicer1/Tnrc6c/Myd88/Larp1/Hnrnpa0/Mapkapk2/Cnot1/Ago2/Elavl1/Cnot6l/Tut4/Srsf1/Larp4b/Rc3h2/Hnrnpr/Rock1/Pum2/Rock2/Hnrnpm/Tnrc6a/Pabpc1/Syncrip/Csde1/Tnrc6b/Hnrnpu/Zfp36l1/Celf1/Tent5a/Tardbp/Vim/Tut7/Zfp36/Apobec1/Zfp36l2/Fus	GO Biological Process
Macrophages	GO:0006909	phagocytosis	114	-0.469871	-1.55853	0.000775381	0.0290885	0.0249152	646	tags=32%, list=16%, signal=28%	Il2rg/Iglc3/Itgal/Fcer1g/Cdc42/Iglc2/Sirpb1a/Dock2/Calr/Rack1/Cnn2/Pot1b/Ncf2/Csk/Myh9/Hck/Siglece/Ptprj/Rac2/Ighg2b/Itgb1/Cd300lf/Cd47/Itgb2/Fgr/Pecam1/Sod1/Syk/Coro1a/Stap1/Pld4/Hspa8/Pycard/Ighm/Itgam/Ptprc/Il1b	GO Biological Process
Macrophages	GO:0043086	negative regulation of catalytic activity	182	-0.424568	-1.46678	0.000780559	0.0290885	0.0249152	1008	tags=40%, list=25%, signal=31%	Gmip/Picalm/Cflar/Cast/Hhex/Cdkn1b/Chordc1/Mical1/Pten/Arfgef1/Birc6/Mgat5/Midn/Csnk2a1/Kdm5a/Gadd45b/Cblb/Akap9/Prkar1a/Sh3bp5/Pkn1/Ppp1r9b/Ifi204/Lyn/Ddx3x/Gnai2/Ppp1r12a/Hnrnpr/Ppp2r5a/Rock1/F11r/Ikbkb/Rock2/Xiap/Rpl23/Pip4k2a/Bod1l/Usp47/Prdx5/Gpi1/Gpx1/Ptpn22/Sorl1/Pot1b/Csk/Bcl2a1d/Hnrnpu/Wnk1/App/Psen2/Ptprj/Rgs2/Lilrb4a/Ptpn1/Cst3/Prkcd/Grk2/Tmed10/Dnaja1/Nr4a1/Zfp36/Eif4a2/Ptpn6/Rpl5/Pec…	GO Biological Process
Macrophages	mmu03040	Spliceosome - Mus musculus (house mouse)	88	-0.463349	-1.48801	0.00276472	0.0291283	0.02297	703	tags=28%, list=18%, signal=24%	Srsf6/Sf3b2/Hnrnpk/Acin1/Sf3b1/Srsf1/Dhx15/Hnrnpc/Srsf3/Hnrnpm/Srsf5/Ddx39b/Srsf7/Hnrnpu/Pcbp1/Hnrnpa3/Tra2b/Srsf2/Prpf38b/Rbm25/Tra2a/Snrnp70/Fus/Ddx5/Hspa8	Kegg Pathway
Macrophages	GO:0001848	complement binding	6	-0.860063	-1.78214	0.00171655	0.0294216	0.0258024	178	tags=50%, list=4%, signal=48%	Cr2/Itgb2/Itgam	GO Molecular Function
Macrophages	GO:0003823	antigen binding	35	-0.572959	-1.69276	0.0019339	0.0306916	0.0269162	762	tags=54%, list=19%, signal=44%	Ighd/Tap2/Iglc3/Iglc2/H2-Q4/Tap1/Hnrnpm/Ighg2b/H2-Q6/Itga4/H2-T23/H2-Q7/Tapbp/H2-Eb1/H2-Ab1/H2-D1/H2-Aa/Ighm/H2-K1	GO Molecular Function
Macrophages	GO:0003682	chromatin binding	252	-0.398696	-1.39687	0.00189878	0.0306916	0.0269162	1462	tags=52%, list=36%, signal=35%	Tpr/Mcmbp/Lmo2/Taf1/Maz/Actn4/Phc2/Ldb1/Ctcf/Atxn7/Pparg/Sp3/Smc1a/Suz12/Tnrc18/Psip1/Npm1/Lcor/Phf1/Tle4/Mta2/Atad2/Mllt6/Nfatc3/Phf21a/Ep400/Chd7/Elk4/Smarca2/Setd7/Jarid2/Stat5b/Ncoa1/Yy1/Rest/Top1/Trp53/Wac/Cux1/Noc2l/Cbx7/Ccnt1/Hp1bp3/Akap8/Nr3c1/Srebf2/Rnf20/Sarnp/Chd6/Hhex/Satb1/Pcna/Nsd2/Safb/Ccnt2/Ubtf/Zfp445/Set/Ncoa3/Fli1/Sbno1/Kat6a/Chd8/Ncoa2/Nupr1/Phc3/Kcnq1ot1/Hes1/Polr2a/Supt5/Non…	GO Molecular Function
Macrophages	GO:0140694	non-membrane-bounded organelle assembly	121	-0.459127	-1.53014	0.000901213	0.0311219	0.0266569	1061	tags=41%, list=26%, signal=31%	Mapre1/Rhoa/Senp6/Tubb5/Cflar/Rpl6/Aup1/Dicer1/Lsm14a/Stag2/Cnot1/Tia1/Flna/Ezr/Prkar1a/Arhgef2/Cnot6l/Ddx3x/Msn/Rpl38/Mef2c/Pum2/G3bp2/Tasor/Csde1/Rps25/Zfp207/Actg1/Prrc2c/Hnrnpu/Ncor1/Dync1h1/Hck/Arpc2/Rpsa/Numa1/Rps19/Akap13/Rps14/Itgb1/Rps23/Lcp1/Mef2a/Rps28/Ddx6/Rpl5/Asb2/Rps27/Rpl23a/Rps15	GO Biological Process
Macrophages	GO:0001501	skeletal system development	106	-0.462056	-1.51678	0.000882298	0.0311219	0.0266569	1385	tags=58%, list=35%, signal=39%	Acp2/Notch2/Smad7/Cadm1/Sp3/Tgfbr1/Zfand5/Chd7/Esrra/Anxa6/Nab1/Trp53/Lrrk1/Sh2b3/Rhoa/Pbxip1/Serp1/Hexa/Nsd2/Bbx/Dicer1/Trip11/Fli1/Hif1a/Abi1/Tgfbr2/Rpl13/Gnas/Sgpl1/Flna/Setd2/Glg1/Acp5/Pax5/Zbtb7a/Flvcr1/Mef2d/Pafah1b1/Asxl2/Atp6ap1/Rpl38/Mef2c/Pum2/Foxn3/Ankrd11/Pip4k2a/Smad1/Mia3/Rassf2/Cited2/Ep300/Trps1/Nipbl/Ash1l/Akap13/Runx1/Cr2/Fgr/Ptpn6/Foxp1/Ltf/Ptprc	GO Biological Process
Macrophages	GO:0030855	epithelial cell differentiation	147	-0.439413	-1.49388	0.000879322	0.0311219	0.0266569	1200	tags=46%, list=30%, signal=34%	Sav1/Rapgef1/Heg1/Slc4a7/Arid4b/Stat5b/Vezf1/Rest/Sgpp1/Ppp3ca/Cux1/Abcb1b/Rhoa/Tubb5/Ugcg/Hhex/Cdkn1b/Dicer1/Ncoa3/Arid4a/Hif1a/Myd88/Hes1/Plod3/Srsf6/Akr1b3/Atf4/Flna/Ezr/Akap9/Rbpj/Map3k1/Myo1e/Cdc42/Ccnd1/Pafah1b1/Rock1/Creb1/Msn/F11r/Mef2c/Ikbkb/Safb2/Rock2/Skil/Kdm2a/Gpx1/Cdk6/Txnip/Jmjd1c/Lbh/Zfp36l1/Numa1/Rap1b/Mtss1/Vim/Xbp1/Cebpb/Zfp36/Pecam1/Sod1/Atrx/Tagln2/Foxp1/Btg1/Zeb2/Klf2/Il1b	GO Biological Process
Macrophages	GO:0043068	positive regulation of programmed cell death	213	-0.41231	-1.4442	0.000899098	0.0311219	0.0266569	914	tags=34%, list=23%, signal=28%	Nsmaf/Pten/Calm1/Adam10/Ldha/Hif1a/Rpl26/Nupr1/Atp2a2/Fcer2a/Itpr1/Map3k5/Sp110/Ralbp1/Degs1/Gadd45b/Tia1/Adam17/Ccar1/Atf4/Adrb1/Acin1/Tnfaip8/Map3k1/Lyn/Cdc42/Ddx3x/Usp7/Bcl6/Atf3/Pdia3/Creb1/Ppp1ca/Mef2c/Skil/Rack1/Lcn2/Txnip/Rassf2/Bclaf1/Trps1/Ncf2/Slk/App/Psen2/Rbm5/Prkcd/Rps29/Itga4/Grk2/Itgb1/Atf6/Dnaja1/Xbp1/Nr4a1/Mcl1/Sfpq/Rps6/Sod1/Syk/Ctsh/Stk17b/Grn/Serinc3/S100a9/Btg1/Tcf7l2/Laptm5/…	GO Biological Process
Macrophages	GO:0042127	regulation of cell population proliferation	452	-0.368341	-1.32458	0.000897471	0.0311219	0.0266569	1382	tags=46%, list=34%, signal=34%	Cd274/Pmaip1/Notch2/Ctcf/Smad7/Rassf5/Jund/Rreb1/Pparg/Phf14/Rb1cc1/Cox17/Tgfbr1/Suz12/Brd7/Kras/Npm1/Ctsz/Pik3r1/Ccdc88b/Pias1/Pik3cd/Il4ra/Marcksl1/Sos1/Cnbp/Tmem127/S1pr1/Esrra/Ripor2/Smarca2/Stx4a/H2-DMb2/Sav1/Camk2d/Rapgef1/Rasal3/Jarid2/Cers2/Itgav/Mdm4/Stat5b/Rest/Trp53/Ppp3ca/Cdc73/Csf2rb/Hipk1/Siglecg/Fes/Fbrs/Sh2b3/Inpp5d/Ggnbp2/Rhoa/Btg2/Hp1bp3/Nr3c1/Pbxip1/Cflar/Stat6/Hhex/Cdkn1b/Pten…	GO Biological Process
Macrophages	mmu04670	Leukocyte transendothelial migration - Mus musculus (house mouse)	51	-0.498491	-1.52566	0.00311896	0.0317273	0.0250196	737	tags=47%, list=19%, signal=39%	Ncf1/Ezr/Itgal/Cdc42/Vasp/Gnai2/Rock1/Msn/F11r/Rock2/Sipa1/Actg1/Pxn/Ncf2/Ptk2b/Rap1b/Rac2/Itga4/Itgb1/Itgb2/Prkcb/Pecam1/Cybb/Itgam	Kegg Pathway
Macrophages	GO:0006584	catecholamine metabolic process	11	-0.769397	-1.83252	0.000945319	0.0317971	0.0272353	10	tags=27%, list=0%, signal=27%	Akr1b3/Ly6e/Itgam	GO Biological Process
Macrophages	GO:0009712	catechol-containing compound metabolic process	11	-0.769397	-1.83252	0.000945319	0.0317971	0.0272353	10	tags=27%, list=0%, signal=27%	Akr1b3/Ly6e/Itgam	GO Biological Process
Macrophages	mmu05162	Measles - Mus musculus (house mouse)	56	-0.501004	-1.54791	0.00336147	0.0330545	0.0260661	845	tags=39%, list=21%, signal=31%	Myd88/Csnk2a1/Tab2/Cblb/Ccnd3/Bcl2/Jak1/Il2rg/Irak1/Fos/Ccnd1/Msn/Ikbkb/Rack1/Cdk6/Stat1/Nfkbia/Stat3/Nfkb1/Hspa8/Ccnd2/Il1b	Kegg Pathway
Macrophages	GO:0001503	ossification	87	-0.482529	-1.55151	0.00102481	0.0333871	0.0285971	753	tags=36%, list=19%, signal=30%	Sbno2/Gnas/Atf4/Bcl2/Rbpj/Ifi204/Mef2d/Asxl2/Rpl38/Mef2c/Smad1/Tcirg1/Mia3/Cdk6/Rassf2/Tob2/Nipbl/Ptk2b/Srgn/Mtss1/Hdac7/Tent5a/Runx1/Junb/Cebpb/Fgr/Ltf/Ddx5/Tcf7l2/Ifitm3/Atp2b1	GO Biological Process
Macrophages	GO:0015837	amine transport	19	-0.688303	-1.83051	0.0010486	0.0335292	0.0287188	264	tags=26%, list=7%, signal=25%	Rgs2/Grk2/Itgb1/Prkcb/Il1b	GO Biological Process
Macrophages	GO:0051952	regulation of amine transport	19	-0.688303	-1.83051	0.0010486	0.0335292	0.0287188	264	tags=26%, list=7%, signal=25%	Rgs2/Grk2/Itgb1/Prkcb/Il1b	GO Biological Process
Macrophages	GO:0050729	positive regulation of inflammatory response	54	-0.537792	-1.66223	0.0011123	0.0341798	0.0292762	352	tags=30%, list=9%, signal=27%	Ets1/App/Nfkbia/Rps19/Ighg2b/Alox5ap/Cebpb/Cd47/Ctss/Grn/Stap1/S100a9/Nfkbiz/S100a8/Pycard/Il1b	GO Biological Process
Macrophages	GO:0045766	positive regulation of angiogenesis	53	-0.535446	-1.6535	0.00109378	0.0341798	0.0292762	352	tags=34%, list=9%, signal=31%	Smad1/Ets1/Pxn/Ptk2b/Mtdh/Runx1/Stat3/Itgb1/Nfe2l2/Xbp1/Itgb2/Prkcb/Ctsh/Grn/Camp/Itgax/Btg1/Il1b	GO Biological Process
Macrophages	mmu05145	Toxoplasmosis - Mus musculus (house mouse)	50	-0.503921	-1.53892	0.00390359	0.0371471	0.0292935	845	tags=42%, list=21%, signal=33%	Myd88/Ciita/Tab2/H2-DMb1/Bcl2/Jak1/Irak1/Gnai2/Ikbkb/Xiap/H2-Ob/Stat1/Nfkbia/Stat3/Itgb1/Nfkb1/Il10ra/H2-Eb1/Hspa8/H2-Ab1/H2-Aa	Kegg Pathway
Macrophages	GO:0032970	regulation of actin filament-based process	144	-0.437222	-1.48396	0.00122909	0.0372321	0.0318905	1243	tags=47%, list=31%, signal=34%	Cotl1/S1pr1/Arap1/Cyfip1/Myo1c/Pak2/Rhoh/Taok2/Capza1/Fes/Rhoa/Crk/Twf2/Cyfip2/Actr3/Arfgef1/Pde4b/Capg/Fchsd2/Atp2a2/S100a10/Specc1l/Taok1/Flna/Akap9/Adrb1/Plek/Grb2/Arpc1b/Map3k1/Rnd3/Cdc42/Vasp/Arhgdia/Rock1/F11r/Swap70/Mef2c/Hcls1/Rock2/Ssh2/Cnn2/Sptbn1/Add3/Evl/Actg1/Arhgap17/Pxn/Ptk2b/Myh9/Hck/Arpc2/Atp1a1/Rac2/Capzb/Mtpn/Mtss1/Akap13/Prkcd/Cd47/Fgr/Arhgdib/Pecam1/Gmfg/Iqgap1/Coro1a/Stap1/P…	GO Biological Process
Macrophages	GO:0140297	DNA-binding transcription factor binding	204	-0.410364	-1.41594	0.00244251	0.0380588	0.0333771	1468	tags=50%, list=37%, signal=33%	Sik1/Spop/Lmo2/Taf1/Actn4/Rnf6/Notch2/Ldb1/Ctcf/Jund/Pparg/Sp3/Psip1/Npm1/Lcor/Pik3r1/Pias1/Tle4/Mta2/Stat5b/Ncoa1/Yy1/Rest/Trp53/Noc2l/Uhrf2/Taf4/Ccnt1/Thrap3/Akap8/Pbxip1/Usf2/Bcl3/Hhex/Satb1/Pcna/Zfp516/Ncoa3/Hif1a/Kat6a/Ncoa2/Hes1/Ciita/Brd8/Cnot1/Med13/Crebbp/Atf4/Flna/Bcl2/Crtc3/Rbpj/Pkn1/Trip12/Spen/Fos/Lmo4/Chd4/Zbtb7a/Tcf4/Mef2d/Bcl6/Creb1/Mef2c/Hcls1/Calr/Dnmt3a/Cited2/Sp100/Nsd1/Ep300/…	GO Molecular Function
Macrophages	mmu04062	Chemokine signaling pathway - Mus musculus (house mouse)	70	-0.478932	-1.50212	0.00428672	0.0395182	0.0311633	657	tags=37%, list=17%, signal=32%	Grb2/Gnb1/Lyn/Cdc42/Gnb2/Gnai2/Rock1/Ikbkb/Rock2/Dock2/Pxn/Ptk2b/Stat1/Hck/Rap1b/Nfkbia/Rac2/Prkcd/Stat3/Grk2/Gngt2/Fgr/Prkcb/Nfkb1/Grk3/Ccl6	Kegg Pathway
Macrophages	GO:0034330	cell junction organization	161	-0.434319	-1.48446	0.00135462	0.0403271	0.0345415	1493	tags=56%, list=37%, signal=37%	Ctnnb1/Dgkz/Tgfb1/Ptpra/Rab8b/Tlr2/Pdcd6ip/Arhgap39/Actn4/Lims1/Ldb1/Smad7/Cadm1/Tgfbr1/Plec/C1qc/Pik3r1/Clasp2/Nptn/Map4k4/Rapgef1/Heg1/Itgav/Cyfip1/Myo1c/Rest/Pak2/Taok2/Capza1/Hipk1/C3/Rhoa/Tubb5/Caprin1/Picalm/Vmp1/Pkn2/Sipa1l1/Pten/Utrn/Actr3/Adam10/S100a10/Specc1l/Flna/Hnrnpk/Bcl2/Mecp2/Cdc42/Chd4/Fyn/Pafah1b1/Sdf4/Rock1/C1qa/F11r/Vcp/Mef2c/Setd5/Ikbkb/Rock2/Ube3a/Adgre5/Actg1/Zmynd8/Pxn/Sl…	GO Biological Process
Macrophages	GO:0019220	regulation of phosphate metabolic process	410	-0.372433	-1.33608	0.0013968	0.0407015	0.0348622	952	tags=32%, list=24%, signal=27%	Cdkn1b/Chordc1/Mical1/Pten/Stk11/Calm1/Dicer1/Socs3/Il6ra/Raf1/Mgat5/Hif1a/Midn/Nupr1/Anxa2/Abi1/Tgfbr2/Hes1/Ptges3/Mob1a/Map3k5/Zfp91/Ralbp1/Ppp6r3/Gadd45b/Tab2/Gnas/Cblb/Adam17/Ccnd3/Ctdsp2/Irf1/Malt1/Akap9/Bcl2/Prkar1a/Itpkb/Arhgef2/Sh3bp5/Plek/Rbpms/Pkn1/Dynll1/Irak1/Fgd2/Ppp1r9b/Ppp1r15b/Map3k1/Lyn/Lmo4/Cdc42/Ywhae/Fyn/Zbtb7a/Ddx3x/Gnai2/Bank1/Ppp1r12a/Brd4/Ccnd1/Ppp2r5a/Rock1/Swap70/Vcp/Mef…	GO Biological Process
Macrophages	GO:0051174	regulation of phosphorus metabolic process	410	-0.372433	-1.33608	0.0013968	0.0407015	0.0348622	952	tags=32%, list=24%, signal=27%	Cdkn1b/Chordc1/Mical1/Pten/Stk11/Calm1/Dicer1/Socs3/Il6ra/Raf1/Mgat5/Hif1a/Midn/Nupr1/Anxa2/Abi1/Tgfbr2/Hes1/Ptges3/Mob1a/Map3k5/Zfp91/Ralbp1/Ppp6r3/Gadd45b/Tab2/Gnas/Cblb/Adam17/Ccnd3/Ctdsp2/Irf1/Malt1/Akap9/Bcl2/Prkar1a/Itpkb/Arhgef2/Sh3bp5/Plek/Rbpms/Pkn1/Dynll1/Irak1/Fgd2/Ppp1r9b/Ppp1r15b/Map3k1/Lyn/Lmo4/Cdc42/Ywhae/Fyn/Zbtb7a/Ddx3x/Gnai2/Bank1/Ppp1r12a/Brd4/Ccnd1/Ppp2r5a/Rock1/Swap70/Vcp/Mef…	GO Biological Process
Macrophages	GO:0006778	porphyrin-containing compound metabolic process	12	0.834178	2.31745	0.00160463	0.0440398	0.0377216	88	tags=50%, list=2%, signal=49%	Blvrb/Hmox1/Hebp1/Blvra/Atpif1/Tmem14c	GO Biological Process
Macrophages	GO:0033013	tetrapyrrole metabolic process	12	0.834178	2.31745	0.00160463	0.0440398	0.0377216	88	tags=50%, list=2%, signal=49%	Blvrb/Hmox1/Hebp1/Blvra/Atpif1/Tmem14c	GO Biological Process
Macrophages	GO:0042168	heme metabolic process	12	0.834178	2.31745	0.00160463	0.0440398	0.0377216	88	tags=50%, list=2%, signal=49%	Blvrb/Hmox1/Hebp1/Blvra/Atpif1/Tmem14c	GO Biological Process
Macrophages	GO:0031347	regulation of defense response	203	-0.410793	-1.43202	0.00157002	0.0440398	0.0377216	789	tags=32%, list=20%, signal=27%	Metrnl/Trim56/Nono/Itch/Ncf1/Trafd1/Sbno2/Irf1/Tap2/Tnip1/Ifi204/Fcer1g/Lyn/Acp5/Bcl6/Brd4/Matr3/Ifi203/Mef2c/Tap1/Slc15a4/Gpx1/Ptpn22/Smpdl3b/Ets1/Spn/Cd37/Stat1/Ifi209/Siglece/Pcbp2/Mndal/App/Nfkbia/Celf1/Rps19/Ash1l/Ighg2b/Samhd1/Alox5ap/Spi1/Hmgb2/Nfe2l2/Cebpb/Cd47/Zfp36/Fgr/Hsp90aa1/Ctss/Sfpq/Sod1/Nfkb1/Syk/Apobec3/Foxp1/Pik3ap1/Grn/Stap1/S100a9/Nfkbiz/S100a8/Pycard/Clec2d/Cd74/Il1b	GO Biological Process
Macrophages	GO:0071396	cellular response to lipid	183	-0.414164	-1.43092	0.00160686	0.0440398	0.0377216	1045	tags=39%, list=26%, signal=30%	Rhoa/Akap8/Twf2/Nr3c1/Trim12a/Strn3/Safb/Rps6kb1/Ncoa3/Pde4b/Myd88/Ncoa2/Cd84/Kmt2d/Ptges3/Setx/Cnot1/Sbno2/Gnas/Hnrnpk/Malt1/Tut4/Tnip1/Irak1/Lyn/Zbtb7a/Cd180/Pdia3/Creb1/Msn/Mef2c/Safb2/Rock2/Ube3a/Calr/Ep300/Ptpn22/Hnrnpu/Lbh/Ncor1/Ptk2b/Mtdh/Stat1/Zfp36l1/Atp1a1/Nfkbia/Lilrb4a/Ly86/Akap13/Arid1a/Vim/Spi1/Cr2/Dnaja1/Xbp1/Cebpb/Ddx17/Ogt/Zfp36/Nrip1/B2m/Nfkb1/Syk/Foxp1/Zfp36l2/Stap1/Ltf/Ddx5/Py…	GO Biological Process
Macrophages	mmu04659	Th17 cell differentiation - Mus musculus (house mouse)	52	-0.497089	-1.52386	0.00492826	0.0440557	0.0347415	1305	tags=58%, list=33%, signal=39%	Tgfbr1/Il4ra/H2-DMa/Nfatc3/H2-DMb2/Stat5b/Ppp3ca/Stat6/Il6ra/Ebi3/Hif1a/Tgfbr2/Il21r/H2-DMb1/Jak1/Il2rg/Fos/Ikbkb/H2-Ob/Stat1/Nfkbia/Runx1/Stat3/Hsp90aa1/Nfkb1/Hsp90ab1/H2-Eb1/H2-Ab1/H2-Aa/Il1b	Kegg Pathway
Macrophages	mmu04970	Salivary secretion - Mus musculus (house mouse)	23	-0.613137	-1.66072	0.00519605	0.0450834	0.0355519	909	tags=52%, list=23%, signal=40%	Adcy7/Calm1/Itpr1/Gnas/Adrb1/Itpr2/Atp1a1/Cst3/Prkcb/Camp/Atp2b1/Lyz2	Kegg Pathway
Macrophages	GO:0042311	vasodilation	12	-0.7464	-1.81735	0.00169719	0.0458287	0.0392538	745	tags=67%, list=19%, signal=54%	Plod3/Adrb1/Gpx1/Rgs2/P2rx4/Grk2/Sod1/Klf2	GO Biological Process
Macrophages	GO:0032703	negative regulation of interleukin-2 production	7	-0.833401	-1.77389	0.00169867	0.0458287	0.0392538	263	tags=86%, list=7%, signal=80%	Ezr/Lilrb4a/Hdac7/Zfp36/Laptm5/Ptprc	GO Biological Process
Macrophages	GO:0051493	regulation of cytoskeleton organization	179	-0.415107	-1.43127	0.00175899	0.0470224	0.0402763	1352	tags=48%, list=34%, signal=33%	Atxn7/Flii/Tgfbr1/Eml4/Npm1/Pik3r1/Clasp2/Cotl1/S1pr1/Ripor2/Arap1/Diaph1/Cyfip1/Myo1c/Pak2/Hsph1/Rhoh/Taok2/Capza1/Fes/Mapre1/Rhoa/Crk/Twf2/Senp6/Cyfip2/Cyld/Cdkn1b/Actr3/Arfgef1/Capg/Fchsd2/S100a10/Specc1l/Taok1/Flna/Akap9/Arhgef2/Plek/Grb2/Mecp2/Arpc1b/Map3k1/Rnd3/Cdc42/Vasp/Arhgdia/Pafah1b1/Rock1/F11r/Swap70/Mef2c/Hcls1/Rock2/Ssh2/Sptbn1/Add3/Evl/Actg1/Arhgap17/Cdk2ap2/Pxn/Hnrnpu/Ptk2b/Dync1h…	GO Biological Process
Macrophages	GO:0008631	intrinsic apoptotic signaling pathway in response to oxidative stress	24	-0.638562	-1.76695	0.00179259	0.0473017	0.0405155	877	tags=50%, list=22%, signal=39%	Hif1a/Map3k5/Nono/Ralbp1/Stk24/Bcl2/P4hb/Gpx1/Nfe2l2/Mcl1/Sfpq/Sod1	GO Biological Process
Macrophages	GO:0048585	negative regulation of response to stimulus	440	-0.362405	-1.30087	0.0017889	0.0473017	0.0405155	1447	tags=46%, list=36%, signal=33%	Synj2bp/Zfp451/Pid1/Psmb4/Ppp2ca/Maz/Prkacb/Spred1/Ppp3cb/Limd1/Herpud1/Abca7/Rbbp7/Arrb2/Grk6/Smad7/Cbl/Atxn7/Pparg/Phf14/Rb1cc1/Usp25/Tgfbr1/Rif1/Parp14/Dok1/Amfr/Zfp592/Tle4/Il4ra/Arrdc1/Clasp2/Tmem127/Csnk1a1/Ripor2/Ubash3b/Herc4/Rapgef1/Rasal3/Heg1/Bmt2/Cers2/Itgav/Mdm4/Arid4b/Ilrun/Tmbim6/Trp53/Ivns1abp/Pfdn5/Nop53/Rhoh/Noc2l/Rab7b/Siglecg/Stk38/Sh2b3/Inpp5d/Ggnbp2/Rhoa/Crk/Mark3/Cdc42se1/U…	GO Biological Process
Macrophages	GO:0009719	response to endogenous stimulus	406	-0.375301	-1.3465	0.00184081	0.0479164	0.041042	1045	tags=36%, list=26%, signal=29%	Rhoa/Crk/Akap8/Nr3c1/Ubr2/Cdc5l/Srebf2/Ugcg/Cflar/Stat6/Strn3/Safb/Pten/Stk11/Actr3/Rps6kb1/Socs3/Ebi3/Ncoa3/Arid4a/Pde4b/Myd88/Ncoa2/Atp2a2/Ehd1/Tgfbr2/Hes1/Kmt2d/Ptges3/Setx/Itpr1/Larp1/Brd8/Cnot1/Mbp/Vps13c/Gnas/Adam17/Ccnd3/Crebbp/Irf1/Atf4/Flna/Hnrnpk/Ezr/Akap9/Bcl2/Arhgef2/Jak1/Grb2/Rbpj/Nrros/Mecp2/Ppp1r9b/Itpr2/Map3k1/Fcer1g/Lyn/Fos/Glg1/Rnf111/Fyn/Zbtb7a/Gnai2/Ccnd1/Rock1/Creb1/Mef2c/Ikb…	GO Biological Process
Macrophages	GO:0045723	positive regulation of fatty acid biosynthetic process	7	-0.831273	-1.76936	0.00185616	0.0480745	0.0411774	19	tags=29%, list=0%, signal=28%	Cd74/Il1b	GO Biological Process

## Sheet: Monocytes_pathway
ClusterID	ID	Description	setSize	enrichmentScore	NES	pvalue	p.adjust	qvalue	rank	leading_edge	core_enrichment	PathwayDB
Monocytes	mmu00190	Oxidative phosphorylation - Mus musculus (house mouse)	97	0.765481	2.30278	1e-10	5.33779e-09	4.33396e-09	1237	tags=70%, list=16%, signal=60%	Cox8a/Atp6v0c/Cox5a/Atp5g1/Cox7b/Uqcrb/Sdhb/Cox6b1/Cox5b/Ndufa7/Cox6c/Atp6v0e/Ndufa13/Atp5j/Ndufa11/Atp6v1g1/Cox7c/Atp6v0b/Atp5e/Atp5g2/Atp5j2/Atp5c1/Ndufc2/Ndufb4/Atp5d/Ndufb8/Atp6v1f/Ndufs4/Cox7a2/Ndufa12/Uqcr10/Ndufs5/Atp5l/Ndufb9/Ndufs8/Atp5b/Ndufv3/Ndufv2/Ndufa8/Ndufa4/Cycs/Ndufc1/Cyc1/Atp5o/Ndufb7/Ndufs7/Ndufb2/Ndufa3/Ndufa1/Atp6v1e1/Uqcrq/Ndufa5/Ndufs3/Ndufab1/Ndufb6/Cox4i1/Ndufb10/Ndufb11…	Kegg Pathway
Monocytes	mmu03010	Ribosome - Mus musculus (house mouse)	128	0.724482	2.24733	1e-10	5.33779e-09	4.33396e-09	1334	tags=64%, list=17%, signal=54%	Rpl10/Rpl15/Rps18/Rpl34/Rps15a/Rplp0/Uba52/Rpl11/Rpl32/Rpl9/Rps3/Rps7/Rpl24/Rps11/Rpl21/Fau/Rpl28/Rps2/Rpl36/Rpl26/Rpl19/Rpl14/Rpl22l1/Mrps18c/Rpl27a/Rpl13/Mrps14/Rps27a/Rps10/Rps4x/Rpl3/Rpl8/Rpl10a/Rpl39/Mrpl20/Rpl29/Rps13/Rps5/Mrpl14/Rpl35/Rpl18/Rps23/Rpl37/Mrpl21/Rpl18a/Rpl36al/Rpl27/Rpl17/Rpl30/Rps29/Rps25/Rpl6/Rpl7a/Rpl23/Mrpl23/Mrpl17/Mrpl33/Mrpl35/Mrpl34/Rpl7/Mrps16/Mrpl2/Mrpl30/Mrpl32/Rps…	Kegg Pathway
Monocytes	mmu05012	Parkinson disease - Mus musculus (house mouse)	189	0.670001	2.12413	1e-10	5.33779e-09	4.33396e-09	1258	tags=55%, list=16%, signal=47%	Ubb/Cox8a/Psmd8/Cox5a/Atp5g1/Cox7b/Bax/Uba52/Txn1/Psmb2/Uqcrb/Sdhb/Cox6b1/Calm1/Cox5b/Ndufa7/Nfe2l2/Psma2/Cox6c/Psmb5/Ndufa13/Atp5j/Vdac2/Dusp1/Psma5/Ndufa11/Cox7c/Park7/Psma3/Atp5e/Atp5g2/Atp5c1/Ndufc2/Ndufb4/Atp5d/Psmb6/Ndufb8/Rps27a/Ndufs4/Cox7a2/Psma4/Ndufa12/Psmb3/Calm2/Uqcr10/Ndufs5/Slc25a4/Ndufb9/Ndufs8/Atp5b/Ndufv3/Ndufv2/Psmb1/Ndufa8/Ubc/Psma7/Ndufa4/Cycs/Ndufc1/Cyc1/Htra2/Psmd4/Psmc4/At…	Kegg Pathway
Monocytes	mmu05415	Diabetic cardiomyopathy - Mus musculus (house mouse)	136	0.675687	2.10335	1e-10	5.33779e-09	4.33396e-09	1241	tags=54%, list=16%, signal=46%	Cyba/Gapdh/Cox8a/Cox5a/Atp5g1/Cox7b/Uqcrb/Sdhb/Cox6b1/Cox5b/Ndufa7/Cox6c/Cd36/Ndufa13/Atp5j/Vdac2/Cybb/Ndufa11/Cox7c/Mpc2/Atp5e/Atp5g2/Atp5c1/Ndufc2/Ndufb4/Atp5d/Ncf4/Ace/Ndufb8/Ndufs4/Cox7a2/Ndufa12/Mpc1/Uqcr10/Ndufs5/Slc25a4/Ndufb9/Ndufs8/Atp5b/Ndufv3/Ndufv2/Ndufa8/Ndufa4/Pdk3/Ndufc1/Cyc1/Atp5o/Gsr/Ndufb7/Ndufs7/Ndufb2/Ndufa3/Ndufa1/Uqcrq/Ndufa5/Camk2d/Ndufs3/Ndufab1/Vdac3/Ndufb6/Cox4i1/Ndufb10…	Kegg Pathway
Monocytes	mmu05208	Chemical carcinogenesis - reactive oxygen species - Mus musculus (house mouse)	150	0.648182	2.03155	1e-10	5.33779e-09	4.33396e-09	1241	tags=52%, list=16%, signal=45%	Cyba/Hmox1/Sod2/Nfkbia/Cox8a/Cox5a/Atp5g1/Cox7b/Jun/Uqcrb/Sdhb/Cox6b1/Ptpn1/Cox5b/Ndufa7/Nfe2l2/Cox6c/Fos/Ndufa13/Atp5j/Vdac2/Ndufa11/Cox7c/Atp5e/Atp5g2/Atp5c1/Ndufc2/Ndufb4/Atp5d/Ndufb8/Ndufs4/Cox7a2/Ndufa12/Uqcr10/Ndufs5/Slc25a4/Gsto1/Ndufb9/Ndufs8/Atp5b/Ndufv3/Ndufv2/Ndufa8/Ndufa4/Ptprj/Ndufc1/Cyc1/Acp1/Atp5o/Ndufb7/Ndufs7/Ndufb2/Ndufa3/Ndufa1/Uqcrq/Ndufa5/Kras/Ndufs3/Ndufab1/Vdac3/Ndufb6/Cox4…	Kegg Pathway
Monocytes	mmu05016	Huntington disease - Mus musculus (house mouse)	212	0.609152	1.94625	1e-10	5.33779e-09	4.33396e-09	1258	tags=48%, list=16%, signal=41%	Sod2/Cox8a/Psmd8/Cox5a/Atp5g1/Clta/Cox7b/Bax/Psmb2/Uqcrb/Sdhb/Cox6b1/Cox5b/Ndufa7/Psma2/Cox6c/Psmb5/Ndufa13/Atp5j/Vdac2/Psma5/Tgm2/Ndufa11/Cox7c/Psma3/Atp5e/Atp5g2/Atp5c1/Ndufc2/Ndufb4/Atp5d/Polr2j/Psmb6/Ndufb8/Ndufs4/Cox7a2/Psma4/Ndufa12/Psmb3/Uqcr10/Ndufs5/Slc25a4/Ndufb9/Ndufs8/Atp5b/Ndufv3/Gpx1/Ndufv2/Psmb1/Ndufa8/Psma7/Ndufa4/Cycs/Ndufc1/Cyc1/Psmd4/Psmc4/Atp5o/Dctn3/Psma6/Psmd12/Ndufb7/Ndufs7…	Kegg Pathway
Monocytes	mmu05022	Pathways of neurodegeneration - multiple diseases - Mus musculus (house mouse)	295	0.555643	1.80498	1.13916e-10	5.33779e-09	4.33396e-09	1501	tags=44%, list=19%, signal=37%	Ubb/Cox8a/Psmd8/Cox5a/Atp5g1/Cox7b/Bax/Uba52/Psmb2/Uqcrb/Sdhb/Cox6b1/Calm1/Cox5b/Ndufa7/Psma2/Cox6c/Psmb5/Ndufa13/Atp5j/Vdac2/Psma5/Cybb/Ndufa11/Cox7c/Park7/Psma3/Atp5e/Atp5g2/Atp5c1/Ndufc2/Ndufb4/Atp5d/Psmb6/Ndufb8/Rps27a/Ndufs4/Cox7a2/Psma4/Ndufa12/Psmb3/Calm2/Uqcr10/Ndufs5/Slc25a4/Ndufb9/Ndufs8/Atp5b/Ndufv3/Map1lc3b/Gpx1/Ndufv2/Psmb1/Ndufa8/Ubc/Psma7/Ndufa4/Cycs/Ndufc1/Cyc1/Htra2/Psmd4/Psmc4/A…	Kegg Pathway
Monocytes	mmu05020	Prion disease - Mus musculus (house mouse)	181	0.607489	1.92284	1.86457e-10	7.64474e-09	6.20706e-09	1258	tags=52%, list=16%, signal=45%	C1qb/Cyba/Cox8a/Psmd8/Cox5a/Atp5g1/Cox7b/Bax/Psmb2/Uqcrb/Sdhb/Cox6b1/Cox5b/Ndufa7/Psma2/Cox6c/Psmb5/Ndufa13/Atp5j/Vdac2/Psma5/Cybb/Ndufa11/Cox7c/Psma3/Atp5e/Atp5g2/Atp5c1/Ndufc2/Ndufb4/Atp5d/Psmb6/Ncf4/Ndufb8/Ndufs4/Cox7a2/Psma4/Ndufa12/Psmb3/Uqcr10/Ndufs5/Slc25a4/Ndufb9/Ndufs8/Atp5b/Ndufv3/Ndufv2/Psmb1/Ndufa8/Psma7/Ndufa4/Cycs/Ndufc1/Cyc1/Psmd4/Psmc4/Atp5o/Psma6/Psmd12/Ndufb7/Ndufs7/Ndufb2/Ndufa…	Kegg Pathway
Monocytes	mmu05171	Coronavirus disease - COVID-19 - Mus musculus (house mouse)	155	0.631969	1.99017	2.89192e-10	1.05394e-08	8.55738e-09	1284	tags=48%, list=17%, signal=41%	C1qb/Cfb/Isg15/Nfkbia/Rpl10/Rpl15/Rps18/Rpl34/Jun/Rps15a/Rplp0/Uba52/Rpl11/Rpl32/Rpl9/Rps3/Rps7/Rpl24/Rps11/Rpl21/Fos/Fau/Rpl28/Rps2/Cybb/Rpl36/Rpl26/Rpl19/Rpl14/Rpl22l1/Ace/Rpl27a/Rpl13/Rps27a/Rps10/Rps4x/Rpl3/Rpl8/Rpl10a/Rpl39/Ifih1/Rpl29/Rps13/Rps5/Rpl35/Rpl18/Rps23/Rpl37/Rpl18a/Rpl36al/Rpl27/Rpl17/Rpl30/Rps29/Ifnar2/Rps25/Rpl6/Rpl7a/Rpl23/Casp1/Eif2ak2/Nfkbib/Rpl7/Oas1a/Rps16/Rps24/Rps19/Rpl3…	Kegg Pathway
Monocytes	mmu04714	Thermogenesis - Mus musculus (house mouse)	150	0.627985	1.96825	6.84447e-10	2.24499e-08	1.82279e-08	1237	tags=47%, list=16%, signal=40%	Cox8a/Cox5a/Atp5g1/Cox7b/Uqcrb/Sdhb/Cox6b1/Cox5b/Ndufa7/Cox6c/Ndufa13/Atp5j/Ndufa11/Cox7c/Atp5e/Atp5g2/Atp5j2/Atp5c1/Ndufc2/Ndufb4/Atp5d/Rheb/Ndufb8/Ndufs4/Cox7a2/Ndufa12/Coa3/Uqcr10/Ndufs5/Atp5l/Ndufb9/Ndufs8/Atp5b/Ndufv3/Ndufv2/Ndufa8/Ndufa4/Actb/Ndufc1/Cyc1/Atp5o/Ndufb7/Ndufs7/Ndufaf3/Ndufb2/Ndufa3/Ndufa1/Uqcrq/Ndufa5/Kras/Ndufs3/Ndufab1/Ndufb6/Cox4i1/Ndufb10/Ndufb11/Uqcrfs1/Ndufs2/Cox6a1/Nduf…	Kegg Pathway
Monocytes	GO:0015986	proton motive force-driven ATP synthesis	57	0.787459	2.28463	1e-10	4.38262e-08	3.77412e-08	1276	tags=79%, list=16%, signal=67%	Atp5g1/Sdhb/Ndufa7/Ndufa13/Atp5j/Ndufa11/Atp5e/Atp5g2/Atp5j2/Atp5c1/Ndufc2/Ndufb4/Atp5d/Ndufb8/Ndufs4/Ndufa12/Ndufs5/Atp5l/Ndufb9/Ndufs8/Atp5b/Ndufv3/Ndufv2/Ndufa8/Ndufc1/Atp5o/Ndufb7/Ndufs7/Ndufb2/Ndufa3/Ndufa1/Ndufa5/Ndufs3/Ndufab1/Ndufb6/Ndufb10/Ndufb11/Ndufs2/Ndufb5/Ndufa6/Sdhd/Ndufb3/Atp5k/Ndufa9/Stoml2	GO Biological Process
Monocytes	GO:0009145	purine nucleoside triphosphate biosynthetic process	79	0.753705	2.26055	1e-10	4.38262e-08	3.77412e-08	1276	tags=68%, list=16%, signal=58%	Nme2/Aldoa/Eno1/Atp5g1/Trem2/Sdhb/Ndufa7/Ndufa13/Atp5j/Ndufa11/Atp5e/Atp5g2/Atp5j2/Atp5c1/Ndufc2/Ndufb4/Atp5d/Ndufb8/Ndufs4/Pnp/Ndufa12/Ndufs5/Atp5l/Ndufb9/Ndufs8/Atp5b/Ndufv3/Ndufv2/Ndufa8/Ndufc1/Atp5o/Ndufb7/Ndufs7/Ndufb2/Ndufa3/Ndufa1/Ndufa5/Ndufs3/Ndufab1/Pkm/Ndufb6/Uqcc3/Ndufb10/Ndufb11/Dguok/Ndufs2/Ndufb5/Ndufa6/Nme1/Sdhd/Ndufb3/Atp5k/Ndufa9/Stoml2	GO Biological Process
Monocytes	GO:0009206	purine ribonucleoside triphosphate biosynthetic process	78	0.755087	2.25729	1e-10	4.38262e-08	3.77412e-08	1276	tags=69%, list=16%, signal=59%	Nme2/Aldoa/Eno1/Atp5g1/Trem2/Sdhb/Ndufa7/Ndufa13/Atp5j/Ndufa11/Atp5e/Atp5g2/Atp5j2/Atp5c1/Ndufc2/Ndufb4/Atp5d/Ndufb8/Ndufs4/Pnp/Ndufa12/Ndufs5/Atp5l/Ndufb9/Ndufs8/Atp5b/Ndufv3/Ndufv2/Ndufa8/Ndufc1/Atp5o/Ndufb7/Ndufs7/Ndufb2/Ndufa3/Ndufa1/Ndufa5/Ndufs3/Ndufab1/Pkm/Ndufb6/Uqcc3/Ndufb10/Ndufb11/Dguok/Ndufs2/Ndufb5/Ndufa6/Nme1/Sdhd/Ndufb3/Atp5k/Ndufa9/Stoml2	GO Biological Process
Monocytes	GO:0009201	ribonucleoside triphosphate biosynthetic process	81	0.748379	2.2489	1e-10	4.38262e-08	3.77412e-08	1276	tags=67%, list=16%, signal=56%	Nme2/Aldoa/Eno1/Atp5g1/Trem2/Sdhb/Ndufa7/Ndufa13/Atp5j/Ndufa11/Atp5e/Atp5g2/Atp5j2/Atp5c1/Ndufc2/Ndufb4/Atp5d/Ndufb8/Ndufs4/Pnp/Ndufa12/Ndufs5/Atp5l/Ndufb9/Ndufs8/Atp5b/Ndufv3/Ndufv2/Ndufa8/Ndufc1/Atp5o/Ndufb7/Ndufs7/Ndufb2/Ndufa3/Ndufa1/Ndufa5/Ndufs3/Ndufab1/Pkm/Ndufb6/Uqcc3/Ndufb10/Ndufb11/Dguok/Ndufs2/Ndufb5/Ndufa6/Nme1/Sdhd/Ndufb3/Atp5k/Ndufa9/Stoml2	GO Biological Process
Monocytes	GO:0006754	ATP biosynthetic process	74	0.753607	2.24424	1e-10	4.38262e-08	3.77412e-08	1276	tags=69%, list=16%, signal=58%	Aldoa/Eno1/Atp5g1/Trem2/Sdhb/Ndufa7/Ndufa13/Atp5j/Ndufa11/Atp5e/Atp5g2/Atp5j2/Atp5c1/Ndufc2/Ndufb4/Atp5d/Ndufb8/Ndufs4/Ndufa12/Ndufs5/Atp5l/Ndufb9/Ndufs8/Atp5b/Ndufv3/Ndufv2/Ndufa8/Ndufc1/Atp5o/Ndufb7/Ndufs7/Ndufb2/Ndufa3/Ndufa1/Ndufa5/Ndufs3/Ndufab1/Pkm/Ndufb6/Uqcc3/Ndufb10/Ndufb11/Dguok/Ndufs2/Ndufb5/Ndufa6/Sdhd/Ndufb3/Atp5k/Ndufa9/Stoml2	GO Biological Process
Monocytes	GO:0009142	nucleoside triphosphate biosynthetic process	86	0.738576	2.23212	1e-10	4.38262e-08	3.77412e-08	1276	tags=64%, list=16%, signal=54%	Nme2/Aldoa/Eno1/Atp5g1/Trem2/Sdhb/Ndufa7/Ndufa13/Atp5j/Ndufa11/Atp5e/Atp5g2/Atp5j2/Atp5c1/Ndufc2/Ndufb4/Atp5d/Ndufb8/Ndufs4/Pnp/Ndufa12/Ndufs5/Atp5l/Ndufb9/Ndufs8/Atp5b/Ndufv3/Ndufv2/Ndufa8/Ndufc1/Atp5o/Ndufb7/Ndufs7/Ndufb2/Ndufa3/Ndufa1/Ndufa5/Ndufs3/Ndufab1/Cmpk1/Pkm/Ndufb6/Uqcc3/Ndufb10/Ndufb11/Dguok/Ndufs2/Ndufb5/Ndufa6/Nme1/Sdhd/Ndufb3/Atp5k/Ndufa9/Stoml2	GO Biological Process
Monocytes	GO:0006119	oxidative phosphorylation	99	0.722938	2.21858	1e-10	4.38262e-08	3.77412e-08	1276	tags=65%, list=16%, signal=55%	Nupr1/Cox5a/Uqcrb/Sdhb/Cox5b/Ndufa7/Rhoa/Ndufa13/Atp5j/Iscu/Ndufa11/Cox7c/Park7/Atp5e/Atp5j2/Atp5c1/Ndufc2/Ndufb4/Atp5d/Chchd2/Ndufb8/Ndufs4/Cox7a2/Ndufa12/Uqcr10/Ndufs5/Ndufb9/Ndufs8/Atp5b/Ndufv3/Ndufv2/Ndufa8/Cycs/Ndufc1/Cyc1/Atp5o/Uqcc2/Ndufb7/Ndufs7/Ndufb2/Ndufa3/Ndufa1/Uqcrq/Ndufa5/Ndufs3/Ndufab1/Dnajc15/Ndufb6/Cox4i1/Uqcc3/Ndufb10/Ndufb11/Uqcrfs1/Dguok/Ndufs2/Cox6a1/Ndufb5/Ndufa6/Sdhd/Ndufb…	GO Biological Process
Monocytes	GO:0009152	purine ribonucleotide biosynthetic process	123	0.675346	2.10577	1e-10	4.38262e-08	3.77412e-08	1276	tags=50%, list=16%, signal=42%	Nme2/Aldoa/Eno1/Atp5g1/Trem2/Sdhb/Ndufa7/Ndufa13/Atp5j/Ndufa11/Mpc2/Atp5e/Atp5g2/Atp5j2/Atp5c1/Ndufc2/Ndufb4/Atp5d/Ndufb8/Ndufs4/Pnp/Ndufa12/Mpc1/Ndufs5/Atp5l/Ndufb9/Ndufs8/Atp5b/Ndufv3/Ndufv2/Ndufa8/Ak2/Pdk3/Ndufc1/Atp5o/Ndufb7/Ndufs7/Ndufb2/Ndufa3/Ndufa1/Ndufa5/Ndufs3/Ndufab1/Pkm/Aprt/Ndufb6/Uqcc3/Ndufb10/Ndufb11/Hprt/Dguok/Ndufs2/Ndufb5/Ndufa6/Nme1/Acat1/Sdhd/Ndufb3/Atp5k/Ndufa9/Stoml2	GO Biological Process
Monocytes	GO:0009260	ribonucleotide biosynthetic process	129	0.667367	2.095	1e-10	4.38262e-08	3.77412e-08	1276	tags=48%, list=16%, signal=41%	Nme2/Aldoa/Eno1/Atp5g1/Trem2/Sdhb/Ndufa7/Ndufa13/Atp5j/Ndufa11/Mpc2/Atp5e/Atp5g2/Atp5j2/Atp5c1/Ndufc2/Ndufb4/Atp5d/Ndufb8/Ndufs4/Pnp/Ndufa12/Mpc1/Ndufs5/Atp5l/Ndufb9/Ndufs8/Atp5b/Ndufv3/Ndufv2/Ndufa8/Ak2/Pdk3/Ndufc1/Atp5o/Ndufb7/Ndufs7/Ndufb2/Ndufa3/Ndufa1/Ndufa5/Ndufs3/Ndufab1/Cmpk1/Pkm/Aprt/Ndufb6/Uqcc3/Ndufb10/Ndufb11/Hprt/Dguok/Ndufs2/Ndufb5/Ndufa6/Nme1/Acat1/Sdhd/Ndufb3/Atp5k/Ndufa9/Stoml2	GO Biological Process
Monocytes	GO:0006164	purine nucleotide biosynthetic process	131	0.663158	2.08607	1e-10	4.38262e-08	3.77412e-08	1276	tags=49%, list=16%, signal=42%	Nme2/Aldoa/Eno1/Atp5g1/Trem2/Sdhb/Ndufa7/Ndufa13/Atp5j/Ndufa11/Mpc2/Atp5e/Atp5g2/Atp5j2/Atp5c1/Ndufc2/Ndufb4/Atp5d/Ndufb8/Ndufs4/Pnp/Ndufa12/Mpc1/Ndufs5/Atp5l/Ndufb9/Ndufs8/Atp5b/Ndufv3/Ndufv2/Ndufa8/Ak2/Pdk3/Oasl2/Ndufc1/Atp5o/Ndufb7/Ndufs7/Ndufb2/Ndufa3/Ndufa1/Ndufa5/Ndufs3/Ndufab1/Pkm/Guca1a/Aprt/Ndufb6/Uqcc3/Oas1a/Ndufb10/Ndufb11/Hprt/Dguok/Ndufs2/Ndufb5/Ndufa6/Nme1/Acat1/Sdhd/Ndufb3/Atp5k/Nd…	GO Biological Process
Monocytes	GO:0046390	ribose phosphate biosynthetic process	135	0.659919	2.08303	1e-10	4.38262e-08	3.77412e-08	1276	tags=47%, list=16%, signal=40%	Nme2/Aldoa/Eno1/Atp5g1/Trem2/Sdhb/Ndufa7/Ndufa13/Atp5j/Ndufa11/Mpc2/Atp5e/Atp5g2/Atp5j2/Atp5c1/Ndufc2/Ndufb4/Atp5d/Ndufb8/Ndufs4/Pnp/Ndufa12/Mpc1/Ndufs5/Atp5l/Ndufb9/Ndufs8/Atp5b/Ndufv3/Ndufv2/Ndufa8/Ak2/Pdk3/Ndufc1/Atp5o/Ndufb7/Ndufs7/Ndufb2/Ndufa3/Ndufa1/Ndufa5/Pygl/Ndufs3/Ndufab1/Cmpk1/Pkm/Aprt/Ndufb6/Uqcc3/Ndufb10/Ndufb11/Hprt/Dguok/Ndufs2/Ndufb5/Ndufa6/Nme1/Acat1/Sdhd/Ndufb3/Atp5k/Ndufa9/Sto…	GO Biological Process
Monocytes	GO:0072522	purine-containing compound biosynthetic process	134	0.656329	2.07251	1e-10	4.38262e-08	3.77412e-08	1276	tags=48%, list=16%, signal=41%	Nme2/Aldoa/Eno1/Atp5g1/Trem2/Sdhb/Ndufa7/Ndufa13/Atp5j/Ndufa11/Mpc2/Atp5e/Atp5g2/Atp5j2/Atp5c1/Ndufc2/Ndufb4/Atp5d/Ndufb8/Ndufs4/Pnp/Ndufa12/Mpc1/Ndufs5/Atp5l/Ndufb9/Ndufs8/Atp5b/Ndufv3/Ndufv2/Ndufa8/Ak2/Pdk3/Oasl2/Ndufc1/Atp5o/Ndufb7/Ndufs7/Ndufb2/Ndufa3/Ndufa1/Ndufa5/Ndufs3/Ndufab1/Pkm/Guca1a/Aprt/Ndufb6/Uqcc3/Oas1a/Ndufb10/Ndufb11/Hprt/Dguok/Ndufs2/Ndufb5/Ndufa6/Nme1/Acat1/Sdhd/Ndufb3/Atp5k/Nd…	GO Biological Process
Monocytes	GO:0009205	purine ribonucleoside triphosphate metabolic process	154	0.636724	2.03465	1e-10	4.38262e-08	3.77412e-08	1276	tags=47%, list=16%, signal=40%	Nme2/Aldoa/Eno1/Gapdh/Nupr1/Atp5g1/Trem2/Tspo/Sdhb/Ndufa7/Rhoa/Fis1/Eif6/Ndufa13/Atp5j/Tpi1/Ndufa11/Eno3/Atp5e/Atp5g2/Atp5j2/Atp5c1/Ndufc2/Ndufb4/Atp5d/Ndufb8/Ndufs4/Pnp/Ndufa12/Ndufs5/Atp5l/Ndufb9/Ndufs8/Atp5b/Ndufv3/Slc2a6/Ndufv2/Ndufa8/Ak2/Ndufc1/Atp5o/Ndufb7/Ndufs7/Ndufb2/Ndufa3/Pgk1/Ndufa1/Ndufa5/Pgam1/Ndufs3/Ndufab1/Pkm/Ndufb6/Uqcc3/App/Ola1/Ndufb10/Ndufb11/Pfkl/Atpif1/Dguok/Ndufs2/Ndufb5/F…	GO Biological Process
Monocytes	GO:0009144	purine nucleoside triphosphate metabolic process	158	0.633851	2.03011	1.00827e-10	4.38262e-08	3.77412e-08	1276	tags=46%, list=16%, signal=39%	Nme2/Aldoa/Eno1/Gapdh/Nupr1/Atp5g1/Trem2/Tspo/Sdhb/Ndufa7/Rhoa/Fis1/Eif6/Ndufa13/Atp5j/Tpi1/Ndufa11/Eno3/Atp5e/Atp5g2/Atp5j2/Atp5c1/Ndufc2/Ndufb4/Atp5d/Ndufb8/Ndufs4/Pnp/Ndufa12/Ndufs5/Atp5l/Ndufb9/Ndufs8/Atp5b/Ndufv3/Slc2a6/Ndufv2/Ndufa8/Ak2/Ndufc1/Atp5o/Ndufb7/Ndufs7/Ndufb2/Ndufa3/Pgk1/Ndufa1/Ndufa5/Pgam1/Ndufs3/Ndufab1/Pkm/Ndufb6/Uqcc3/App/Ola1/Ndufb10/Ndufb11/Pfkl/Atpif1/Dguok/Ndufs2/Ndufb5/F…	GO Biological Process
Monocytes	GO:0009199	ribonucleoside triphosphate metabolic process	157	0.632953	2.02891	1e-10	4.38262e-08	3.77412e-08	1276	tags=46%, list=16%, signal=39%	Nme2/Aldoa/Eno1/Gapdh/Nupr1/Atp5g1/Trem2/Tspo/Sdhb/Ndufa7/Rhoa/Fis1/Eif6/Ndufa13/Atp5j/Tpi1/Ndufa11/Eno3/Atp5e/Atp5g2/Atp5j2/Atp5c1/Ndufc2/Ndufb4/Atp5d/Ndufb8/Ndufs4/Pnp/Ndufa12/Ndufs5/Atp5l/Ndufb9/Ndufs8/Atp5b/Ndufv3/Slc2a6/Ndufv2/Ndufa8/Ak2/Ndufc1/Atp5o/Ndufb7/Ndufs7/Ndufb2/Ndufa3/Pgk1/Ndufa1/Ndufa5/Pgam1/Ndufs3/Ndufab1/Pkm/Ndufb6/Uqcc3/App/Ola1/Ndufb10/Ndufb11/Pfkl/Atpif1/Dguok/Ndufs2/Ndufb5/F…	GO Biological Process
Monocytes	GO:0045333	cellular respiration	169	0.622548	2.00021	1.2461e-10	4.51365e-08	3.88695e-08	1537	tags=49%, list=19%, signal=40%	Sod2/Nupr1/Cox5a/Bax/Uqcrb/Sdhb/Cox5b/Ndufa7/Rhoa/Ndufa13/Atp5j/Prelid1/Iscu/Ndufa11/Cox7c/Park7/Atp5e/Atp5j2/Atp5c1/Ndufc2/Ndufb4/Atp5d/Chchd2/Ndufb8/Ndufs4/Cox7a2/Ndufa12/Uqcr10/Ndufs5/Ndufb9/Bloc1s1/Ndufs8/Atp5b/Ndufv3/Ndufv2/Ndufa8/Cycs/Ndufc1/Cyc1/Atp5o/Uqcc2/Ndufb7/Ndufs7/Il10rb/Ndufb2/Ndufa3/Ndufa1/Uqcrq/Etfb/Ndufa5/Ndufs3/Ndufab1/Suclg1/Dnajc15/Ndufb6/Cox4i1/Uqcc3/Oas1a/Ndufb10/Ndufb11/Uq…	GO Biological Process
Monocytes	GO:0002181	cytoplasmic translation	127	0.652114	2.04539	1.61878e-10	5.27721e-08	4.5445e-08	1245	tags=51%, list=16%, signal=44%	Rpl15/Rps18/Rpl34/Rps15a/Rplp0/Uba52/Rpl11/Rpl32/Eif4ebp1/Rpl9/Rps3/Rps7/Rpl24/Rps11/Rpl21/Fau/Rpl28/Rps2/Rpl36/Rpl26/Rpl19/Rpl14/Rpl22l1/Rpl27a/Rpl13/Hnrnpd/Rps27a/Rps10/Rps4x/Rpl3/Rpl8/Rpl10a/Rpl39/Rpl29/Rps13/Rps5/Rpl18/Rps23/Rpl18a/Ybx1/Rpl27/Rpl17/Rpl30/Eif2s2/Eif3m/Rps29/Rps25/Rpl6/Rpl7a/Rpl23/Eif3i/Eif4a1/Dph3/Pkm/Rpl7/Rwdd1/Rps16/Rps24/Rps19/Rpl38/Rpsa/Rps20/Rpl12/Cnbp/Rps14	GO Biological Process
Monocytes	GO:0003735	structural constituent of ribosome	157	0.699546	2.24523	1e-10	5.92e-08	5.16842e-08	1360	tags=57%, list=17%, signal=48%	Isg15/Rpl10/Rpl15/Rps18/Rpl34/Rps15a/Rplp0/Uba52/Rpl11/Rpl32/Mrpl52/Rpl9/Rps3/Ndufa7/Rps7/Rpl24/Rps11/Rpl21/Fau/Rpl28/Rps2/Rpl36/Mrpl54/Rpl26/Mrps24/Rpl19/Rpl14/Rpl22l1/Mrps18c/Rpl27a/Rpl13/Mrps14/Rps27a/Rps10/Rps4x/Rpl3/Rpl8/Rpl10a/Rpl39/Mrpl20/Rpl29/Rps13/Rps5/Mrpl14/Rpl35/Rpl18/Rps23/Rpl37/Mrpl21/Mrpl43/Rpl18a/Rpl36al/Rpl27/Rpl17/Rpl30/Rps29/Rps25/Rpl6/Rpl7a/Rpl23/Mrpl23/Mrpl17/Mrps34/Mrpl33/M…	GO Molecular Function
Monocytes	GO:0005198	structural molecule activity	255	0.585761	1.92932	1e-10	5.92e-08	5.16842e-08	1360	tags=42%, list=17%, signal=36%	Hmox1/Isg15/Rpl10/Rpl15/Rps18/Clta/Arpc3/Rpl34/Rps15a/Rplp0/Uba52/Rpl11/Rpl32/Mrpl52/Rpl9/Rps3/Ndufa7/Rps7/Arpc1b/Rpl24/Rps11/Rpl21/Fau/Cope/Rpl28/Rps2/Rpl36/Mrpl54/Rpl26/Mrps24/Vim/Rpl19/Rpl14/Rpl22l1/Arpc2/Tln1/Mrps18c/Rpl27a/Rpl13/Mrps14/Rps27a/Rps10/Rps4x/Rpl3/Rpl8/Rpl10a/Rpl39/Mrpl20/Rpl29/Rps13/Rps5/Mrpl14/Rpl35/Rpl18/Rps23/Rpl37/Mrpl21/Mrpl43/Rpl18a/Rpl36al/Actb/Rpl27/Rpl17/Rpl30/Tpr/Rps29…	GO Molecular Function
Monocytes	GO:0046034	ATP metabolic process	137	0.650207	2.05716	2.22e-10	6.57928e-08	5.66579e-08	1276	tags=50%, list=16%, signal=42%	Aldoa/Eno1/Gapdh/Nupr1/Atp5g1/Trem2/Tspo/Sdhb/Ndufa7/Fis1/Eif6/Ndufa13/Atp5j/Tpi1/Ndufa11/Eno3/Atp5e/Atp5g2/Atp5j2/Atp5c1/Ndufc2/Ndufb4/Atp5d/Ndufb8/Ndufs4/Ndufa12/Ndufs5/Atp5l/Ndufb9/Ndufs8/Atp5b/Ndufv3/Slc2a6/Ndufv2/Ndufa8/Ak2/Ndufc1/Atp5o/Ndufb7/Ndufs7/Ndufb2/Ndufa3/Pgk1/Ndufa1/Ndufa5/Pgam1/Ndufs3/Ndufab1/Pkm/Ndufb6/Uqcc3/App/Ola1/Ndufb10/Ndufb11/Pfkl/Atpif1/Dguok/Ndufs2/Ndufb5/Fam20c/Ndufa6/H…	GO Biological Process
Monocytes	mmu05014	Amyotrophic lateral sclerosis - Mus musculus (house mouse)	250	0.548206	1.7686	1.46567e-08	4.37037e-07	3.54847e-07	1520	tags=45%, list=20%, signal=38%	Pfn1/Cox8a/Psmd8/Cox5a/Atp5g1/Cox7b/Bax/Psmb2/Uqcrb/Sdhb/Cox6b1/Cox5b/Ndufa7/Psma2/Cox6c/Psmb5/Ndufa13/Atp5j/Psma5/Ndufa11/Cox7c/Psma3/Atp5e/Atp5g2/Atp5c1/Ndufc2/Ndufb4/Atp5d/Psmb6/Ndufb8/Ndufs4/Cox7a2/Psma4/Ndufa12/Psmb3/Uqcr10/Ndufs5/Ndufb9/Ndufs8/Atp5b/Ndufv3/Map1lc3b/Gpx1/Ndufv2/Psmb1/Ndufa8/Psma7/Ndufa4/Cycs/Actb/Ndufc1/Cyc1/Psmd4/Tpr/Psmc4/Atp5o/Dctn3/Psma6/Psmd12/Ndufb7/Ndufs7/Ndufb2/Ndufa…	Kegg Pathway
Monocytes	mmu04932	Non-alcoholic fatty liver disease - Mus musculus (house mouse)	122	0.632999	1.94567	1.70195e-08	4.652e-07	3.77714e-07	1241	tags=49%, list=16%, signal=42%	Cox8a/Cox5a/Cox7b/Socs3/Bax/Jun/Uqcrb/Sdhb/Nr1h3/Cox6b1/Cox5b/Ndufa7/Cox6c/Fos/Ndufa13/Ndufa11/Cox7c/Ndufc2/Ndufb4/Ndufb8/Ndufs4/Cox7a2/Ndufa12/Uqcr10/Ndufs5/Ndufb9/Ndufs8/Ndufv3/Ndufv2/Ndufa8/Ndufa4/Cycs/Ndufc1/Cyc1/Ndufb7/Ndufs7/Ndufb2/Ndufa3/Ndufa1/Cdc42/Uqcrq/Eif2s1/Ndufa5/Ndufs3/Ndufab1/Ndufb6/Cox4i1/Ndufb10/Ndufb11/Uqcrfs1/Ndufs2/Cox6a1/Ndufb5/Ndufa6/Fas/Sdhd/Ndufb3/Uqcrc2/Ndufa9/Rac1	Kegg Pathway
Monocytes	mmu05010	Alzheimer disease - Mus musculus (house mouse)	253	0.546643	1.76289	4.00735e-08	1.01109e-06	8.20939e-07	1520	tags=45%, list=20%, signal=37%	Gapdh/Cox8a/Psmd8/Cox5a/Atp5g1/Cox7b/Psmb2/Uqcrb/Sdhb/Cox6b1/Calm1/Cox5b/Ndufa7/Psma2/Cox6c/Psmb5/Ndufa13/Atp5j/Vdac2/Psma5/Cybb/Ndufa11/Cox7c/Psenen/Psma3/Atp5e/Atp5g2/Atp5c1/Ndufc2/Ndufb4/Atp5d/Psmb6/Lrp1/Ndufb8/Ndufs4/Cox7a2/Psma4/Ndufa12/Psmb3/Calm2/Uqcr10/Ndufs5/Slc25a4/Ndufb9/Ndufs8/Atp5b/Ndufv3/Ndufv2/Psmb1/Ndufa8/Psma7/Ndufa4/Cycs/Ndufc1/Cyc1/Psmd4/Psmc4/Atp5o/Psma6/Psmd12/Lpl/Ndufb7/Nduf…	Kegg Pathway
Monocytes	GO:0000819	sister chromatid segregation	156	-0.475103	-2.12764	1.23373e-08	3.06495e-06	2.6394e-06	1340	tags=37%, list=17%, signal=31%	Smarca4/Gen1/Sgo1/Atm/Zw10/Cep192/Smc5/Apc/Plk1/Stag2/Dpf2/Cul3/Lats1/Bub1b/Spag5/Mad2l1/Naa50/Knstrn/Fbxo5/Ube2c/Prc1/Aurkb/Ncapg2/Mcmbp/Kat2b/Anapc1/Kif22/Spc25/Nipbl/Pds5b/Tacc3/Kpnb1/Ncaph2/Ncapg/Incenp/Brd7/Nusap1/Mis12/Baz1b/Cit/Zfp207/Cenpe/Numa1/Smc2/Pbrm1/Smc4/Kif23/Cdt1/Ncapd2/Pds5a/Rad21/Smarcd2/Sfpq/Arid1a/Racgap1/Atrx/Kif11/Top2a	GO Biological Process
Monocytes	GO:0098813	nuclear chromosome segregation	182	-0.446177	-2.06828	1.42367e-08	3.20081e-06	2.75639e-06	1740	tags=44%, list=22%, signal=35%	Tubg1/Rb1/Tnks/Slf2/Wrap73/Mau2/Rmi1/Smc3/Mlh1/Arid2/Spc24/Ppp2r1a/Kif4/Terf1/Chmp7/Ctnnb1/Arid1b/Smarca4/Gen1/Sgo1/Atm/Zw10/Cep192/Smc5/Apc/Plk1/Sun1/Stag2/Ndc1/Dpf2/Cul3/Lats1/Bub1b/Spag5/Rcc2/Mad2l1/Naa50/Knstrn/Fbxo5/Ube2c/Prc1/Aurkb/Ncapg2/Mcmbp/Kat2b/Anapc1/Kif22/Spc25/Nipbl/Pds5b/Tacc3/Kpnb1/Ncaph2/Ncapg/Incenp/Brd7/Nusap1/Mis12/Baz1b/Cit/Zfp207/Cenpe/Numa1/Smc2/Pbrm1/Smc4/Kif23/Cenpf/Cdt1…	GO Biological Process
Monocytes	GO:0007059	chromosome segregation	224	-0.405243	-1.88509	3.88156e-08	7.66901e-06	6.60422e-06	1740	tags=42%, list=22%, signal=34%	Slf2/Wrap73/Csnk2a2/Rcc1/Mau2/Rmi1/Smc3/Mlh1/Arid2/Naa60/Spc24/Ppp2r1a/Ercc2/Kif4/Terf1/Chmp7/Ndel1/Ctnnb1/Mms19/Arid1b/Ctcf/Mis18a/Smarca4/Tlk1/Gen1/Sgo1/Atm/Zw10/Cep192/Smc5/Apc/Plk1/Sun1/Stag2/Ndc1/Usp9x/Dpf2/Cul3/Lats1/Bub1b/Spag5/Pmf1/Rcc2/Mad2l1/Hjurp/Naa50/Knstrn/Fbxo5/Ube2c/Prc1/Aurkb/Pum1/Ncapg2/Mcmbp/Ddx3x/Kat2b/Anapc1/Kif22/Spc25/Rgs14/Nipbl/Pds5b/Tacc3/Kpnb1/Ncaph2/Ncapg/Incenp/Brd7/N…	GO Biological Process
Monocytes	GO:0033108	mitochondrial respiratory chain complex assembly	69	0.700356	2.07667	1.43962e-07	2.26198e-05	1.94792e-05	1527	tags=61%, list=19%, signal=50%	Ndufa11/Ndufc2/Ndufb4/Ndufb8/Ndufs4/Sdhaf1/Ndufa12/Coa3/Ndufs5/Ndufb9/Ndufs8/Ndufa8/Ndufc1/Uqcc2/Ndufb7/Ndufs7/Ndufaf3/Ndufb2/Ndufa3/Ndufa1/Ndufa5/Tmem126a/Ndufs3/Ndufab1/Ndufb6/Uqcc3/Ndufb10/Ndufb11/Ndufs2/Ndufaf8/Ndufb5/Ndufa6/Cox14/Ndufb3/Ndufa9/Pet100/Cox20/Dmac1/Sdhaf4/Ndufaf7/Samm50/Cox16	GO Biological Process
Monocytes	GO:0000280	nuclear division	251	-0.378585	-1.80714	1.4571e-07	2.26198e-05	1.94792e-05	1804	tags=40%, list=23%, signal=32%	Rb1/Tnks/Cdc25b/Tgfb1/Lsm14a/Slf2/Wrap73/Rcc1/Mau2/Rmi1/Smc3/Mlh1/Spast/Arid2/Mzt1/Spc24/Ppp2r1a/Terf1/Cdc14a/Chmp7/Foxj2/Ndel1/Rad51ap1/Arid1b/Bora/Reep3/Ubxn2b/Smarca4/Gen1/Sgo1/Atm/Zw10/Cep192/Smc5/Apc/Plk1/Sun1/Stag2/Ndc1/Igf1r/Tasor/Spin1/Dpf2/Cul3/Reep4/Tpx2/Bub1b/Spag5/Mad2l1/Naa50/Clasp1/Knstrn/Fbxo5/Ube2c/Prc1/Ripor2/Aurkb/Ncapg2/Kat2b/Anapc1/Kif22/Spc25/Nipbl/Pds5b/Rad54l/Tacc3/Kpnb1/Nc…	GO Biological Process
Monocytes	GO:0002252	immune effector process	370	0.491645	1.64499	1.49339e-07	2.2644e-05	1.95e-05	1188	tags=29%, list=15%, signal=26%	H2-Eb1/H2-Ab1/H2-Aa/C1qb/Fcer1g/Hmox1/Cfb/Treml4/Cd74/Dnase1l3/Tyrobp/Mif/Vamp8/Lilrb4a/H2-DMb1/Prdx1/Irf7/Rap1a/Ptafr/H2-D1/Bst2/Cd300a/Trem2/Clec4e/Spi1/Cebpb/Apbb1ip/Il4i1/Pglyrp1/Hfe/Lgals3/Trem3/Lgals1/Itgb2/Cd40/Cd36/Anxa1/Slc11a1/Fgr/Lcp1/Ptprc/Cd47/Crlf2/Icam1/Selenok/Cx3cr1/Ace/Axl/Lrp1/Ifi35/Nmi/H2-DMa/Pycard/Pnp/Myo1g/Bcl10/Rsad2/Ceacam1/Ptpn6/Il18/Ctsh/B2m/Relb/Sh2d1b1/Csf2rb2/Csf2rb/…	GO Biological Process
Monocytes	mmu05144	Malaria - Mus musculus (house mouse)	24	0.828182	2.06586	1.52743e-06	3.57855e-05	2.90556e-05	480	tags=42%, list=6%, signal=39%	Hbb-bs/Hba-a2/Hba-a1/Hbb-bt/Itgb2/Cd40/Cd36/Icam1/Lrp1/Il18	Kegg Pathway
Monocytes	mmu04110	Cell cycle - Mus musculus (house mouse)	117	-0.473641	-2.00546	1.76901e-06	3.86824e-05	3.14077e-05	1767	tags=45%, list=23%, signal=35%	Rb1/Cdc25b/Tgfb1/Tfdp1/Mau2/Smc3/Ppp2r1a/Ppp2r1b/Mcm4/Cdc14a/Ppp2r5e/Skp2/Gsk3b/Sgo1/Cdc25a/Atm/Cdc45/Plk1/Hdac1/Ywhae/Hdac2/Stag2/Mdm2/Pkmyt1/Bub1b/Mad2l1/Fbxo5/Ccnd3/Aurkb/Crebbp/Cdk2/Ppp2r5c/Anapc1/Nipbl/Pds5b/Mcm7/Rbl1/Mcm2/Ccna2/Mcm3/Mcm6/Ppp2r5a/Cdt1/Ep300/Knl1/Ccnd2/Pds5a/Ywhah/Rad21/E2f2/Mcm5/Atrx/Pcna	Kegg Pathway
Monocytes	GO:1903311	regulation of mRNA metabolic process	224	-0.389137	-1.81017	3.15147e-07	4.46687e-05	3.84667e-05	1257	tags=34%, list=16%, signal=29%	Sf1/Cnot8/Cdc73/Tob1/Rnf20/Mettl16/Dicer1/Ncbp1/Cnot3/Ahcyl1/U2af2/Ptbp1/Csde1/Hnrnpk/Cdk9/Fxr2/Cpsf7/Cnot1/Khdrbs1/Tra2a/Hspa8/Rock2/Zbtb7a/Eif4enif1/Pan2/Alkbh5/Tra2b/Syncrip/Hnrnpl/Zc3hav1/Srsf2/Supt5/Rc3h1/Srsf4/Fto/Taf15/Pum1/Acin1/Dyrk1a/Rc3h2/Mbnl3/Rbm5/Pabpc4/Khsrp/Ythdf1/Hnrnpm/Elavl1/Cpsf6/Hnrnpr/Tnrc6b/Ptbp3/Rbm38/Hnrnpc/Ccnt1/Ythdf3/Hnrnpa2b1/Rock1/Cnot6l/Pan3/Rbm39/Safb/Srsf6/Cnot6/S…	GO Biological Process
Monocytes	GO:0034097	response to cytokine	478	0.465718	1.56301	3.37117e-07	4.5526e-05	3.9205e-05	1062	tags=24%, list=13%, signal=22%	Cxcl9/H2-Eb1/H2-Ab1/Ifitm2/H2-Aa/Fabp4/Fcer1g/Ifitm3/Cd74/Isg15/Nfkbia/Eno1/Gapdh/Vamp8/Ifngr1/Csf1r/Irf7/Socs3/Bst2/Trem2/Rplp0/Spi1/Cxcl16/Ifi205/Cebpb/Traf1/Ifi207/Rps3/Nfe2l2/Parp14/Cd40/Ifi211/Rhoa/Gbp2/Ifi204/Cd274/Dusp1/Anxa1/Slc11a1/Rps2/Il1rn/Zbp1/Ptprc/Vim/Serpina3g/Ifitm6/Cd47/Slc12a2/Crlf2/Il2rg/Icam1/Cx3cr1/Axl/Nmi/Ifit3/Rpl3/Pycard/Ifih1/Xaf1/Ceacam1/Mpc1/Ptpn6/Arid5b/Il18/Atp5b/Cd1…	GO Biological Process
Monocytes	GO:0048002	antigen processing and presentation of peptide antigen	48	0.732248	2.08276	4.06165e-07	5.19254e-05	4.47159e-05	809	tags=46%, list=10%, signal=41%	H2-Eb1/H2-Ab1/H2-Aa/Fcer1g/Cd74/Ifi30/H2-DMb1/Ctss/H2-D1/Trem2/Hfe/Clec4a3/Slc11a1/H2-DMa/Pycard/Clec4a1/B2m/Ctsl/Fcgr1/Clec4b1/Clec4a2/Pdia3	GO Biological Process
Monocytes	mmu04723	Retrograde endocannabinoid signaling - Mus musculus (house mouse)	64	0.672139	1.93318	3.03899e-06	6.22992e-05	5.05831e-05	1237	tags=58%, list=16%, signal=49%	Gngt2/Gng5/Ndufa7/Ndufa13/Ndufa11/Ndufc2/Ndufb4/Ndufb8/Ndufs4/Ndufa12/Ndufs5/Ndufb9/Ndufs8/Ndufv3/Ndufv2/Ndufa8/Ndufa4/Ndufc1/Ndufb7/Ndufs7/Ndufb2/Ndufa3/Ndufa1/Ndufa5/Ndufs3/Ndufab1/Ndufb6/Gnai2/Ndufb10/Ndufb11/Gng12/Ndufs2/Ndufb5/Ndufa6/Ndufb3/Gng10/Ndufa9	Kegg Pathway
Monocytes	GO:0051983	regulation of chromosome segregation	91	-0.532756	-2.19064	5.40934e-07	6.65451e-05	5.73057e-05	1340	tags=44%, list=17%, signal=37%	Smarca4/Gen1/Atm/Zw10/Cep192/Smc5/Apc/Plk1/Dpf2/Cul3/Bub1b/Rcc2/Mad2l1/Fbxo5/Ube2c/Aurkb/Pum1/Ncapg2/Kat2b/Anapc1/Spc25/Tacc3/Ncaph2/Ncapg/Incenp/Brd7/Cit/Zfp207/Cenpe/Numa1/Smc2/Pbrm1/Smc4/Cdt1/Ncapd2/Pum2/Rad21/Smarcd2/Arid1a/Mki67	GO Biological Process
Monocytes	GO:0015078	proton transmembrane transporter activity	61	0.697579	2.0501	1.78818e-07	7.05736e-05	6.16139e-05	1121	tags=49%, list=14%, signal=43%	Cox8a/Atp6v0c/Cox5a/Atp5g1/Cox7b/Cox6c/Atp6v0e/Atp5j/Slc11a1/Atp6v1g1/Cox7c/Atp6v0b/Atp5e/Atp5g2/Atp5j2/Atp5c1/Atp5d/Atp6v1f/Cox7a2/Slc25a4/Atp5l/Atp5b/Cyc1/Atp5o/Atp6v1e1/Uqcrq/Cox4i1/Slc25a5/Uqcrfs1/Cox6a1	GO Molecular Function
Monocytes	GO:0042393	histone binding	179	-0.416766	-1.91335	3.40697e-07	0.000100846	8.80433e-05	2100	tags=45%, list=27%, signal=34%	Hinfp/Set/Psme4/Mllt3/Kmt5c/Atad2b/Sbno1/Mllt1/Scmh1/Sphk2/Zmynd8/Tnks/Yeats2/Ing3/Pih1d1/Rcc1/Fmr1/Hdgfl2/Kdm4a/Kmt2d/Stat1/Kdm5a/Baz2a/Sirt1/L3mbtl3/Uhrf2/Cbx7/Samd1/Smarca4/Chd8/Hira/Taf1/Phf1/Rnf20/Rbbp5/Dek/Kmt2e/Pwwp2a/Suz12/Kmt2c/Brd2/Phc2/Nasp/Srcap/Spin1/Tbl1x/Pygo2/Dpf2/Ing1/Hjurp/Anp32b/Tbl1xr1/Phf8/Dnajc9/Phc3/Hpf1/Ncapg2/Zmynd11/Brd3/Ssrp1/Rsf1/Cbx5/Kdm7a/Mcm2/Mllt10/Brd7/Ipo7/Kat6a/…	GO Molecular Function
Monocytes	mmu05140	Leishmaniasis - Mus musculus (house mouse)	53	0.693016	1.93875	6.88676e-06	0.000132874	0.000107885	763	tags=38%, list=10%, signal=34%	H2-Eb1/H2-Ab1/H2-Aa/Marcksl1/Cyba/Nfkbia/Ifngr1/H2-DMb1/Itgb1/Jun/Itgb2/Fos/Cybb/Ncf4/H2-DMa/Ptpn6/Fcgr1/Itga4/Itgam/Fcgr4	Kegg Pathway
Monocytes	mmu03050	Proteasome - Mus musculus (house mouse)	44	0.718076	1.98457	9.45606e-06	0.00017231	0.000139905	1712	tags=80%, list=22%, signal=62%	Psmd8/Psmb8/Psmb2/Psma2/Psmb5/Psma5/Psmb10/Psme2/Psma3/Psmb6/Psma4/Psmb3/Pomp/Psmb1/Psma7/Psme1/Psmb9/Psmd4/Psmc4/Psma6/Psmd12/Psmd14/Psmc5/Psmc2/Psmd7/Psma1/Sem1/Psmb7/Psmd6/Psmd11/Psmc6/Psmb4/Psmd1/Adrm1/Psmd9	Kegg Pathway
Monocytes	mmu05143	African trypanosomiasis - Mus musculus (house mouse)	15	0.869063	1.97902	1.19521e-05	0.000206331	0.000167528	480	tags=40%, list=6%, signal=38%	Hbb-bs/Hba-a2/Hba-a1/Hbb-bt/Icam1/Il18	Kegg Pathway
Monocytes	mmu05323	Rheumatoid arthritis - Mus musculus (house mouse)	44	0.71402	1.97336	1.33053e-05	0.000218208	0.000177171	557	tags=39%, list=7%, signal=36%	H2-Eb1/H2-Ab1/H2-Aa/Atp6v0c/H2-DMb1/Jun/Itgb2/Atp6v0e/Fos/Atp6v1g1/Atp6v0b/Icam1/Atp6v1f/H2-DMa/Il18/Ctsl/Acp5	Kegg Pathway
Monocytes	GO:0002683	negative regulation of immune system process	239	0.51156	1.68242	1.97888e-06	0.000238931	0.000205757	699	tags=22%, list=9%, signal=21%	Tmem176a/Tmem176b/H2-Aa/Fcer1g/Lst1/Hmox1/Nme2/Cd74/Isg15/Tyrobp/Mif/Lilrb4a/Smpdl3b/Bst2/Cd300a/Trem2/Cd68/Spi1/Samsn1/Cebpb/Il4i1/Pglyrp1/Hfe/Nr1h3/Lgals3/Ifi207/Parp14/Ifi204/Cd274/Dusp1/Anxa1/Mafb/Fgr/Ptprc/Tnfaip8l2/Cd47/Cx3cr1/Axl/Nmi/Ceacam1/Ptpn6/Slfn1/Sh2d1b1/Gpx1/Ptprj/Acp5/Lyn/Spn/Sdc4/Banf1/Slamf8/Cuedc2/Gps2	GO Biological Process
Monocytes	GO:0016491	oxidoreductase activity	312	0.490978	1.62514	1.07925e-06	0.000255566	0.000223121	1285	tags=25%, list=16%, signal=22%	Hba-a1/Hbb-bt/Fth1/Prdx5/Cyba/Hmox1/Sod2/Gapdh/Cox8a/Ifi30/Hpgd/Cox5a/Cox7b/Prdx1/Txn1/Selenow/Il4i1/Sdhb/Ndufa7/Cox6c/Selenof/Gpx4/Blvrb/Cybb/Cox7c/Msrb1/Park7/Ldha/Ndufc2/Ndufb8/Ndufs4/Cox7a2/Alox5ap/Cyb5a/Gsto1/Ndufs8/Tecr/Gpx1/Ndufv2/Txnl1/Hmox2/Txndc17/Msmo1/Cyc1/Gsr/Ndufb7/Ndufs7/Prdx4/Pgk1/Gstp1/Uqcrq/Etfb/Txnrd1/Blvra/Pdia3/Ndufs3/Hsd17b12/Cyb5r3/Pdia6/Cbr3/Phyh/Cox4i1/Akr1a1/Hsd17b10/Hsd…	GO Molecular Function
Monocytes	mmu04145	Phagosome - Mus musculus (house mouse)	100	0.589085	1.77894	1.68631e-05	0.000263386	0.000213853	1357	tags=43%, list=18%, signal=36%	H2-Eb1/H2-Ab1/H2-Aa/Cyba/Sec61g/Atp6v0c/H2-DMb1/Ctss/H2-D1/Itgb1/Itgb2/Atp6v0e/Cd36/Cybb/Atp6v1g1/Atp6v0b/Ncf4/Atp6v1f/H2-DMa/Cd14/Ctsl/Fcgr1/Actb/Sec61b/Dync1i2/Msr1/Itgam/Atp6v1e1/Fcgr4/Tfrc/Rab5a/H2-M3/H2-K1/Lamp2/Calr/Eea1/Itgb5/Rac1/H2-Eb2/Rab5c/Itgav/H2-T23/Lamp1	Kegg Pathway
Monocytes	GO:0007005	mitochondrion organization	359	0.47512	1.58854	4.0029e-06	0.000449981	0.000387504	2152	tags=45%, list=27%, signal=34%	Sod2/Bax/Trem2/Jun/Tspo/Fis1/Vdac2/Prelid1/Ndufa11/Park7/Gabarap/Rab5if/Ndufc2/Ndufb4/Atp5d/Chchd2/Grpel1/Ndufb8/Ndufs4/Cox7a2/Sh3glb1/Pycard/Pnp/Micos13/Sdhaf1/Ndufa12/Coa3/Tomm22/Ndufs5/Slc25a4/Ndufb9/Ndufs8/Map1lc3b/Gabarapl2/Gpx1/Ndufa8/Timm23/Fundc2/Slirp/Rnf7/Ndufc1/Htra2/Parl/Dnajc19/Uqcc2/Ndufb7/Ppp2cb/Ndufs7/Ndufaf3/Atg3/Ndufb2/Ndufa3/Casp1/Ndufa1/Ndufa5/Tmem126a/Timm13/Bcap31/Mrpl17/Ndu…	GO Biological Process
Monocytes	GO:0006954	inflammatory response	343	0.476025	1.58937	4.41614e-06	0.000488021	0.000420262	1003	tags=29%, list=13%, signal=27%	Cxcl9/Aif1/Pla2g7/Fabp4/Fcer1g/Cyba/Hmox1/Dnase1l3/Hp/Nfkbia/Tyrobp/Mif/Nupr1/Vamp8/Lilrb4a/Ifngr1/Csf1r/Smpdl3b/Ctss/Ptafr/Socs3/Cd300a/Itgb1/Trem2/Jun/Cd68/Cebpb/Metrnl/Pglyrp1/Nr1h3/Fpr2/Lgals1/Itgb2/Nfe2l2/Cd40/Hck/Gpx4/Anxa1/Slc11a1/Cybb/Il1rn/Zbp1/Park7/Tnfaip8l2/Pik3ap1/Cd47/Ndufc2/Crlf2/Ninj1/Icam1/Cx3cr1/Ace/Axl/Lrp1/Ifi35/Nmi/Ndufs4/Lipa/Pycard/Abhd12/Alox5ap/Aimp1/Hpse/Il18/Cd14/Relb/G…	GO Biological Process
Monocytes	GO:0015453	oxidoreduction-driven active transmembrane transporter activity	32	0.757791	2.0136	3.3833e-06	0.000500728	0.000437157	1121	tags=66%, list=14%, signal=57%	Cox8a/Cox5a/Cox7b/Ndufa7/Cox6c/Cox7c/Ndufc2/Ndufb8/Ndufs4/Cox7a2/Ndufs8/Ndufv2/Cyc1/Ndufb7/Ndufs7/Uqcrq/Ndufs3/Cox4i1/Uqcrfs1/Ndufs2/Cox6a1	GO Molecular Function
Monocytes	GO:0031386	protein tag	11	0.911567	1.93758	3.07125e-06	0.000500728	0.000437157	544	tags=82%, list=7%, signal=76%	Ubb/Isg15/Uba52/Sumo2/Nedd8/Ubl5/Rps27a/Sumo1/Ubc	GO Molecular Function
Monocytes	GO:0016571	histone methylation	113	-0.466313	-1.97218	4.76363e-06	0.000517648	0.000445776	1715	tags=42%, list=22%, signal=34%	Pih1d1/Kdm4a/Kmt2d/Kmt5a/Iws1/Prmt5/Baz2a/Setd1a/Paxip1/Ctnnb1/Sirt1/Ncoa6/Chtop/Ctcf/Setdb1/Wdr82/Kansl2/Phf1/Rnf20/Rbbp5/Kmt2e/Hdac2/Suz12/Kmt2c/Asxl2/Pygo2/Ash1l/Nsd1/Arid4b/Hcfc1/Dot1l/Bcor/Crebbp/Setd2/Nsd2/Rif1/Nfya/Tet3/Dnmt1/Setd7/Kmt2a/Setd1b/Ezh2/Ogt/Satb1/Atrx/Pax5/Xbp1	GO Biological Process
Monocytes	GO:0046906	tetrapyrrole binding	38	0.738041	2.01825	7.03633e-06	0.000833101	0.000727334	618	tags=29%, list=8%, signal=27%	Hba-a1/Hbb-bt/Cyba/Hmox1/Prdx1/Hebp1/Cybb/Cyb5a/Cycs/Hmox2/Cyc1	GO Molecular Function
Monocytes	GO:0038023	signaling receptor activity	238	0.505196	1.65769	8.95691e-06	0.000883749	0.000771552	886	tags=27%, list=11%, signal=25%	H2-Eb1/Fcer1g/Cd300c2/Treml4/Cd74/Adgre4/Cd302/Hpgd/Ifngr1/Csf1r/Ptafr/Clec4n/Cd300a/Itgb1/Adgre5/Trem2/Clec4e/Tspo/Cd300e/Pglyrp1/Nr1h3/Cd300ld/Lgals3/Fpr2/Itgb2/Cd40/Cd36/Cd47/Nr4a1/Crlf2/Il2rg/Cx3cr1/Axl/Lrp1/Cd48/P2rx4/Sema4d/Ptpn6/Ctsh/Csf2rb2/Csf2rb/Ramp1/Fcgr1/Spn/Sdc4/Gpr183/Slamf8/Ltb4r1/Ifnar2/P2ry6/Il10rb/Pirb/Bsg/Fpr1/Csf2ra/Fcgr4/Ptk2b/Gpr65/Cd44/Cmklr1/S1pr5/Milr1/Clec4d/Gpr18	GO Molecular Function
Monocytes	GO:0060089	molecular transducer activity	238	0.505196	1.65769	8.95691e-06	0.000883749	0.000771552	886	tags=27%, list=11%, signal=25%	H2-Eb1/Fcer1g/Cd300c2/Treml4/Cd74/Adgre4/Cd302/Hpgd/Ifngr1/Csf1r/Ptafr/Clec4n/Cd300a/Itgb1/Adgre5/Trem2/Clec4e/Tspo/Cd300e/Pglyrp1/Nr1h3/Cd300ld/Lgals3/Fpr2/Itgb2/Cd40/Cd36/Cd47/Nr4a1/Crlf2/Il2rg/Cx3cr1/Axl/Lrp1/Cd48/P2rx4/Sema4d/Ptpn6/Ctsh/Csf2rb2/Csf2rb/Ramp1/Fcgr1/Spn/Sdc4/Gpr183/Slamf8/Ltb4r1/Ifnar2/P2ry6/Il10rb/Pirb/Bsg/Fpr1/Csf2ra/Fcgr4/Ptk2b/Gpr65/Cd44/Cmklr1/S1pr5/Milr1/Clec4d/Gpr18	GO Molecular Function
Monocytes	GO:0034341	response to interferon-gamma	85	0.628205	1.8985	8.8094e-06	0.000911703	0.000785118	754	tags=27%, list=10%, signal=25%	H2-Eb1/H2-Ab1/Ifitm2/H2-Aa/Ifitm3/Cd74/Gapdh/Vamp8/Bst2/Cxcl16/Parp14/Cd40/Gbp2/Slc11a1/Vim/Ifitm6/Cd47/Nmi/Cdc42ep2/Stx8/Ciita/Casp1/Cdc42	GO Biological Process
Monocytes	GO:0008630	intrinsic apoptotic signaling pathway in response to DNA damage	81	0.625412	1.87938	1.2022e-05	0.00118763	0.00102274	808	tags=26%, list=10%, signal=24%	Bcl2a1b/Bcl2a1d/Bcl2a1a/Hmox1/Cd74/Sod2/Mif/Nupr1/Bax/Crip1/Rps3/Ifi204/Rpl26/Pycard/Pnp/Tpt1/Htra2/Cdkn1a/Bcl3/Cd44/Cdkn2d	GO Biological Process
Monocytes	GO:1903555	regulation of tumor necrosis factor superfamily cytokine production	113	0.582502	1.80965	1.18029e-05	0.00118763	0.00102274	1026	tags=34%, list=13%, signal=30%	Fcer1g/Cyba/Tyrobp/Mif/Lilrb4a/Ifngr1/Ptafr/Trem2/Tspo/Cd300ld/Cd36/Cd274/Clec4a3/Ptprc/Cd47/Selenok/Cx3cr1/Axl/Pycard/Clec4a1/Ifih1/Ptpn6/Il18/Cd14/Ptprj/Acp5/Spn/Clec4b1/Lpl/Bcl3/Mapkapk2/Gstp1/Clec4a2/Rasgrp1/Gpr18/Lilra5/Oas1a/App	GO Biological Process
Monocytes	GO:0032680	regulation of tumor necrosis factor production	112	0.576328	1.78349	1.20182e-05	0.00118763	0.00102274	1026	tags=33%, list=13%, signal=29%	Fcer1g/Cyba/Tyrobp/Mif/Lilrb4a/Ifngr1/Ptafr/Trem2/Tspo/Cd300ld/Cd36/Clec4a3/Ptprc/Cd47/Selenok/Cx3cr1/Axl/Pycard/Clec4a1/Ifih1/Ptpn6/Il18/Cd14/Ptprj/Acp5/Spn/Clec4b1/Lpl/Bcl3/Mapkapk2/Gstp1/Clec4a2/Rasgrp1/Gpr18/Lilra5/Oas1a/App	GO Biological Process
Monocytes	GO:0071706	tumor necrosis factor superfamily cytokine production	118	0.574497	1.79054	1.35958e-05	0.00132305	0.00113936	1026	tags=32%, list=13%, signal=28%	Fcer1g/Cyba/Tyrobp/Mif/Lilrb4a/Ifngr1/Ptafr/Trem2/Tspo/Cd300ld/Cd36/Cd274/Clec4a3/Ptprc/Cd47/Selenok/Cx3cr1/Axl/Pycard/Clec4a1/Ifih1/Ptpn6/Il18/Cd14/Ptprj/Acp5/Spn/Clec4b1/Lpl/Bcl3/Mapkapk2/Gstp1/Clec4a2/Rasgrp1/Gpr18/Lilra5/Oas1a/App	GO Biological Process
Monocytes	GO:1905818	regulation of chromosome separation	80	-0.51867	-2.09048	1.45002e-05	0.00137885	0.00118741	1340	tags=42%, list=17%, signal=36%	Smarca4/Gen1/Atm/Zw10/Cep192/Apc/Plk1/Dpf2/Cul3/Bub1b/Mad2l1/Fbxo5/Ube2c/Aurkb/Ncapg2/Anapc1/Spc25/Tacc3/Ncaph2/Ncapg/Incenp/Brd7/Cit/Zfp207/Cenpe/Numa1/Smc2/Pbrm1/Smc4/Cdt1/Ncapd2/Rad21/Smarcd2/Arid1a	GO Biological Process
Monocytes	GO:0033044	regulation of chromosome organization	185	-0.375258	-1.74768	1.45922e-05	0.00137885	0.00118741	1740	tags=38%, list=22%, signal=30%	Slf2/Tcp1/Ino80d/Rnf4/Arid2/Actr8/Nek7/Spc24/Terf1/Cct7/Ctnnb1/Arid1b/Smg1/Pot1a/Tnks2/Mapk3/Smarca4/Gen1/Setdb1/Atm/Ctc1/Zw10/Cep192/Smc5/Apc/Plk1/Terf2/Pml/Tasor/Parp1/Dpf2/Xrcc1/Cul3/Bub1b/Mad2l1/Fbxo5/Ube2c/Map2k7/Wdhd1/Aurkb/Cdk2/Kat2b/Anapc1/Spc25/Mapk1/Tacc3/Mcm2/Ncapg/Incenp/Brd7/Hnrnpa2b1/Dnmt1/Baz1b/Trim28/Cit/Atf7ip/Zfp207/Cenpe/Numa1/Smc2/Pbrm1/Smc4/Cdt1/Ncapd2/Rad21/Smarcd2/Sfpq/Arid…	GO Biological Process
Monocytes	GO:0000226	microtubule cytoskeleton organization	293	-0.325343	-1.59205	1.52082e-05	0.00139603	0.0012022	1825	tags=39%, list=23%, signal=31%	Tubg1/Cep250/Tnks/Lsm14a/Usp33/Ttll4/Wrap73/Rcc1/Ckap2/Smc3/Mlh1/Rnf4/Spast/Mzt1/Ccnl1/Ppp2r1a/Kif4/Cdc14a/Chmp7/Tubgcp3/Ndel1/Atxn7/Ctnnb1/Sirt1/Nav1/Dag1/Bora/Cenpa/Ubxn2b/Gsk3b/Map7d1/Ranbp10/Trim37/Gen1/Mid1ip1/Sgo1/Fkbp4/Zw10/Cep192/Slain2/Dicer1/Apc/Plk1/Tubgcp4/Map1s/Pcnt/Csnk1d/Sun1/Stag2/Ss18/Ccnl2/Pkd1/Tasor/Cyld/Mark3/Rock2/Bicd2/Tpx2/Dvl1/Spag5/Stard9/Mad2l1/Clasp1/Knstrn/Cnp/Fbxo5/Pr…	GO Biological Process
Monocytes	GO:0071345	cellular response to cytokine stimulus	425	0.446826	1.49707	1.72084e-05	0.0015162	0.00130569	1397	tags=28%, list=18%, signal=24%	Cxcl9/H2-Ab1/Ifitm2/Fabp4/Fcer1g/Ifitm3/Cd74/Isg15/Nfkbia/Eno1/Gapdh/Vamp8/Ifngr1/Csf1r/Irf7/Socs3/Trem2/Rplp0/Spi1/Ifi205/Cebpb/Traf1/Ifi207/Rps3/Nfe2l2/Parp14/Cd40/Ifi211/Rhoa/Gbp2/Ifi204/Dusp1/Rps2/Il1rn/Zbp1/Ptprc/Vim/Ifitm6/Cd47/Slc12a2/Crlf2/Il2rg/Icam1/Cx3cr1/Axl/Nmi/Ifit3/Rpl3/Pycard/Ceacam1/Mpc1/Ptpn6/Arid5b/Il18/Atp5b/Csf2rb2/Csf2rb/Etv3/Asah1/Oasl2/Ybx1/Txndc17/Ifit1/Htra2/Tpr/Cdc42ep2…	GO Biological Process
Monocytes	GO:0002275	myeloid cell activation involved in immune response	61	0.659442	1.92547	2.05443e-05	0.00178598	0.00153801	931	tags=34%, list=12%, signal=31%	Fcer1g/Hmox1/Dnase1l3/Tyrobp/Vamp8/Lilrb4a/Ptafr/Cd300a/Trem2/Spi1/Itgb2/Fgr/Ifi35/Nmi/Pycard/Ptpn6/Lyn/Itgam/Milr1/Rasgrp1/Snap23	GO Biological Process
Monocytes	GO:0006811	ion transport	487	0.438249	1.47203	2.25022e-05	0.00193045	0.00166242	1031	tags=21%, list=13%, signal=19%	Cxcl9/Fth1/Atox1/Fcer1g/Cyba/Mif/Atp6v0c/Vamp8/Ifngr1/Atp5g1/Ctss/Ptafr/Sri/Cd300a/Bax/Itgb1/Trem2/Clic1/Fxyd5/Tspo/Calhm6/Cebpb/Hfe/Lgals3/Calm1/Atp6v0e/Rhoa/Cd36/Atp5j/Vdac2/Atp1a1/Iscu/Anxa1/Slc11a1/Cybb/Il1rn/Atp6v1g1/Mpc2/Park7/Ptprc/Atp6v0b/Atp5e/Cd47/Atp5g2/Atp5j2/Atp5c1/Slc12a2/Atp5d/Icam1/Selenok/Ace/Snx3/Atp6v1f/Rnasek/P2rx4/Arl6ip5/Ceacam1/Mpc1/Ptpn6/Calm2/Slc25a4/Atp5l/Gsto1/Atp5b/B2m…	GO Biological Process
Monocytes	GO:0006338	chromatin remodeling	215	-0.359488	-1.66502	2.40344e-05	0.00200903	0.00173008	1804	tags=40%, list=23%, signal=32%	Rb1/Men1/Mta1/Yeats2/Pih1d1/Ino80d/Kdm4a/Arid2/Lmnb2/Actr8/Kmt2d/Mier1/Naa60/Kdm5a/Baz2a/Setd1a/Sirt1/Arid1b/Ttf1/L3mbtl3/Samd1/Ctcf/Mis18a/Smarca4/Mta2/Chd8/Setdb1/Dicer1/Dek/Hdac1/Hdac2/Brd2/Ss18/Rere/Pik3ca/Tasor/Hells/Nasp/Srcap/Zbtb7a/Dpf2/Nudt5/Hjurp/Hcfc1/Anp32b/Phf8/Dnajc9/Wdhd1/Cebpg/Cdk2/Kat2b/Brd3/Setd2/Ssrp1/Ctbp1/Shprh/Rsf1/Rif1/Chaf1a/Dr1/Mcm2/Gatad2b/Padi2/Brd7/Kat6a/Dnmt1/Asf1b/Ba…	GO Biological Process
Monocytes	GO:0061157	mRNA destabilization	71	-0.515128	-2.02863	2.54659e-05	0.00207547	0.0017873	1242	tags=39%, list=16%, signal=34%	Cnot8/Tob1/Mettl16/Cnot3/Csde1/Cnot1/Rock2/Eif4enif1/Pan2/Syncrip/Rc3h1/Fto/Pum1/Rc3h2/Khsrp/Ythdf1/Hnrnpr/Tnrc6b/Ythdf3/Rock1/Cnot6l/Pan3/Cnot6/Ago2/Pabpc1/Tardbp/Celf1/Zfp36l2	GO Biological Process
Monocytes	GO:0072593	reactive oxygen species metabolic process	135	0.547036	1.72672	2.70085e-05	0.0021295	0.00183383	1082	tags=30%, list=14%, signal=27%	Hba-a1/Hbb-bt/Prdx5/Cyba/Sod2/Tyrobp/Atp5g1/Prdx1/Tspo/Fpr2/Itgb2/Nfe2l2/Rhoa/Cd36/Eif6/Cybb/Park7/Ndufc2/Ncf4/Ndufs4/Eif5a/Il18/Gpx1/Acp5/Pdk3/Cycs/Parl/Cdkn1a/Itgam/Prdx4/Gstp1/Ptk2b/Txnrd1/Ndufs3/Pdgfb/Romo1/Gnai2/App/Birc3/Arf4/Atpif1	GO Biological Process
Monocytes	mmu04260	Cardiac muscle contraction - Mus musculus (house mouse)	33	0.708608	1.85442	0.000144074	0.00214801	0.00174405	1493	tags=67%, list=19%, signal=54%	Cox8a/Cox5a/Cox7b/Uqcrb/Cox6b1/Cox5b/Cox6c/Atp1a1/Cox7c/Cox7a2/Uqcr10/Cyc1/Uqcrq/Tpm4/Cox4i1/Uqcrfs1/Cox6a1/Uqcrc2/Atp1a3/Uqcr11/Slc8a1/Uqcrc1	Kegg Pathway
Monocytes	GO:0140053	mitochondrial gene expression	133	0.554155	1.74852	2.87795e-05	0.00220151	0.00189585	1916	tags=41%, list=24%, signal=32%	Mrpl52/Ndufa7/Mrpl54/Mrps24/Mrps18c/Mrps14/Lars2/Mrpl20/Coa3/Mrpl14/Mthfs/Aurkaip1/Mrpl21/Mrpl43/Mrps33/Uqcc2/Malsu1/Mrpl23/Mrpl17/Mrps34/Mrpl33/Mrpl35/Mrpl58/Mrpl34/Mrps16/Mrpl2/Mrpl57/Hsd17b10/Mrpl30/Mrpl32/Mrps18a/Mrps17/Mrpl42/C1qbp/Mrpl27/Mrps10/Mrps15/Mpv17l2/Mrpl36/Chchd1/Mrpl11/Mrps26/Mrpl46/Mrpl18/Mrps5/Mrpl22/Mrps28/Mrpl51/Mrps11/Mrps30/Mrpl53/Mrpl1/Tfam/Mrpl55/Mrps12	GO Biological Process
Monocytes	GO:0050776	regulation of immune response	496	0.431166	1.44807	3.45522e-05	0.00253124	0.00217979	1397	tags=28%, list=18%, signal=25%	H2-Ab1/Bcl2a1d/C1qb/Fcer1g/Cyba/Hmox1/Cfb/Treml4/Cd74/Isg15/Nfkbia/Tyrobp/Mif/Vamp8/Lilrb4a/H2-DMb1/Smpdl3b/Irf7/Rap1a/Ptafr/Clec4n/H2-D1/Cd300a/Bax/Fyb/Trem2/Clec4e/Spi1/Samsn1/Tnip3/Ifi205/Il4i1/Pglyrp1/Hfe/Nr1h3/Lgals3/Fpr2/Trem3/Ifi207/Rps3/Itgb2/Nfe2l2/Parp14/Cd40/Ifi211/Ifi204/Cd36/Cd274/Anxa1/Slc11a1/Zbp1/Fgr/Park7/Ptprc/Pik3ap1/Cd47/Ninj1/Ifi35/Nmi/Cd48/H2-DMa/Pycard/Pnp/Ifih1/Myo1g/Bcl10…	GO Biological Process
Monocytes	GO:0019843	rRNA binding	65	0.630026	1.86713	3.65028e-05	0.00254231	0.00221955	1343	tags=45%, list=17%, signal=37%	Rps18/Rplp0/Rpl11/Rpl9/Rps3/Rps11/Rpl19/Mrps18c/Rps4x/Rpl3/Rpl8/Cirbp/Mrpl20/Rps13/Rps5/Rpl37/Rpl17/Rpl6/Rpl23/Imp3/Rpl7/Mrps18a/Mrps17/Rpl12/Imp4/Rps14/Ddx21/Tlr13/Mrpl11	GO Molecular Function
Monocytes	GO:0070087	chromo shadow domain binding	6	-0.930203	-1.93513	4.54659e-05	0.00283325	0.00247355	557	tags=100%, list=7%, signal=93%	Nipbl/Chaf1a/Trim28/Atrx/Lbr	GO Molecular Function
Monocytes	GO:0002579	positive regulation of antigen processing and presentation	8	0.939091	1.8819	4.20194e-05	0.00296068	0.00254961	415	tags=62%, list=5%, signal=59%	H2-Ab1/Cd74/Trem2/Slc11a1/Pycard	GO Biological Process
Monocytes	GO:0071674	mononuclear cell migration	90	0.592584	1.79749	4.22306e-05	0.00296068	0.00254961	1183	tags=41%, list=15%, signal=35%	Aif1/Pla2g7/Csf1r/Spi1/Cxcl16/Lgals3/Rhoa/Dusp1/Anxa1/Cd47/Slc12a2/Ninj1/Icam1/Selenok/Cx3cr1/Msn/Pycard/Myo1g/Ptprj/Lyn/Spn/Gpr183/Itga4/F11r/Slamf8/Cdc42/Ptk2b/Eps8/Cmklr1/Pdgfb/Stk10/App/Rps19/Itgal/C1qbp/Creb3/Calr	GO Biological Process
Monocytes	GO:0008094	ATP-dependent activity, acting on DNA	73	-0.493041	-1.91738	5.11046e-05	0.00302539	0.0026413	1340	tags=34%, list=17%, signal=29%	Smarca4/Chd8/Wrnip1/Helb/Msh2/Atad5/Hells/Rfc2/Ercc6l/Dna2/Ddx3x/Shprh/Rsf1/Rad54l/Mcm7/Hltf/Mcm2/Mcm3/Mcm6/Bptf/Chd3/Arid1a/Mcm5/Atrx/Top2a	GO Molecular Function
Monocytes	GO:0002685	regulation of leukocyte migration	112	0.563685	1.74436	4.36634e-05	0.00302857	0.00260807	1388	tags=39%, list=18%, signal=33%	Aif1/Pla2g7/Cd74/Mif/Mmp14/Csf1r/Ptafr/Cd300a/Cd9/Trem2/Spi1/Lgals3/Rhoa/Dusp1/Anxa1/Cd47/Ninj1/Icam1/Selenok/Cx3cr1/Msn/P2rx4/Pycard/Mpp1/Ptprj/Lyn/Spn/Itga4/Slamf8/Ptk2b/Cmklr1/Stap1/Gpr18/Stk10/App/C1qbp/Cd81/Creb3/Calr/Rac1/Adam17/Gpsm3/Fadd/Lgals9	GO Biological Process
Monocytes	mmu04978	Mineral absorption - Mus musculus (house mouse)	18	0.800286	1.89901	0.000223866	0.00319253	0.00259213	574	tags=39%, list=7%, signal=36%	Ftl1/Fth1/Atox1/Hmox1/Atp1a1/Mt1/Hmox2	Kegg Pathway
Monocytes	GO:0006261	DNA-templated DNA replication	101	-0.439194	-1.82225	5.36092e-05	0.00356665	0.00307144	1360	tags=32%, list=17%, signal=27%	Mms22l/Wrnip1/Helb/Gen1/Bard1/Cdc45/Atad5/Cdk9/Rfc2/Mcm10/Fbxo5/Dna2/Wdhd1/Mcmbp/Cdk2/Rpa1/Lig1/Nucks1/Mcm7/Rfwd3/Mcm2/Topbp1/Mcm3/E2f8/Baz1a/Mcm6/Cdt1/Rrm1/Mcm5/Fam111a/Atrx/Pcna	GO Biological Process
Monocytes	GO:0004674	protein serine/threonine kinase activity	247	-0.330859	-1.57794	6.58429e-05	0.00371229	0.00324099	1714	tags=34%, list=22%, signal=27%	Csnk2a2/Dcaf1/Sbk1/Mknk1/Nek7/Pdik1l/Mapk7/Nek9/Prkci/Map4k1/Gsk3a/Rps6ka1/Smg1/Taok2/Pak4/Sik2/Ccnk/Grk6/Gsk3b/Mapk3/Csnk1g3/Map3k5/Tlk1/Prkacb/Taf1/Chuk/Atm/Prkcd/Vrk3/Lats2/Araf/Lrrk2/Plk1/Csnk1d/Braf/Akap13/Brd2/Pkmyt1/Map3k20/Mapk14/Cdk9/Uhmk1/Pik3ca/Cdk19/Dyrk2/Mark3/Rock2/Bmpr2/Lats1/Bub1b/Hipk3/Bcr/Mast3/Pikfyve/Map2k3/Rps6kb1/Prkd3/Ccnd3/Clk4/Map3k2/Nlk/Map2k7/Aurkb/Dyrk1a/Mknk2/Cdk2/Prk…	GO Molecular Function
Monocytes	mmu05322	Systemic lupus erythematosus - Mus musculus (house mouse)	25	0.747037	1.86705	0.000293474	0.00401081	0.00325653	937	tags=52%, list=12%, signal=46%	H2-Eb1/H2-Ab1/H2-Aa/C1qb/H3f3b/H3f3a/H2-DMb1/Cd40/H2-DMa/Fcgr1/Fcgr4/Snrpd1/Snrpb	Kegg Pathway
Monocytes	GO:0106222	lncRNA binding	13	-0.801027	-2.15343	9.759e-05	0.00481444	0.00420322	1340	tags=69%, list=17%, signal=58%	Smarca4/Atp2a2/Suz12/Elavl1/Ezh2/Ddx17/Pum2/Celf2/Celf1	GO Molecular Function
Monocytes	GO:0032259	methylation	216	-0.351309	-1.63813	7.6141e-05	0.00491524	0.00423279	1897	tags=37%, list=24%, signal=29%	Nelfa/Mettl3/Rbm15b/Suv39h1/Men1/Prdm15/Prmt3/Cmtr1/Armt1/Pih1d1/Kdm4a/Kmt2d/Tyms/Kmt5a/Iws1/Virma/Prmt5/Gsk3a/Baz2a/Setd1a/Rbm15/Paxip1/Ctnnb1/Sirt1/Ncoa6/Chtop/Trmt2a/Gsk3b/Ctcf/Mis18a/Smarca4/Mta2/Setdb1/Wdr82/Kansl2/Phf1/Rnf20/Fam98a/Mettl16/Rbbp5/Kmt2e/Hdac2/Suz12/Kmt2c/Asxl2/Pik3ca/Ftx/Hells/Parp1/Pygo2/Ilf3/Ash1l/Nsd1/Tgs1/Arid4b/Mepce/Hcfc1/Dot1l/Setd3/Bcor/Rab6a/Crebbp/Setd2/Nsd2/Rif1/Nf…	GO Biological Process
Monocytes	GO:0043269	regulation of ion transport	232	0.483437	1.58909	7.98362e-05	0.00505371	0.00435203	1026	tags=24%, list=13%, signal=22%	Cxcl9/Cyba/Mif/Vamp8/Ifngr1/Ctss/Ptafr/Sri/Cd300a/Bax/Itgb1/Trem2/Clic1/Fxyd5/Tspo/Cebpb/Hfe/Lgals3/Calm1/Rhoa/Atp5j/Atp1a1/Iscu/Cybb/Il1rn/Park7/Slc12a2/Icam1/Ace/P2rx4/Arl6ip5/Ptpn6/Calm2/Slc25a4/Gsto1/B2m/Sumo1/Ndufa4/Lyn/Actb/Commd1/Clec4b1/P2ry6/Cfl1/Ptk2b/Dbi/Camk2d/Arf1/Flna/Tor1a/Pdgfb/S100a1/Clic4/Lilra5/Gnai2/App	GO Biological Process
Monocytes	GO:0031638	zymogen activation	35	0.715579	1.94364	8.70302e-05	0.00535318	0.00460992	974	tags=46%, list=12%, signal=40%	Hp/Eno1/Mmp14/Ctsz/Ifi207/Ifi204/F10/Pycard/Ctsh/Ctsl/Cycs/Plgrkt/Pgk1/S100a10/Cyfip2/Plaur	GO Biological Process
Monocytes	GO:0009617	response to bacterium	334	0.448894	1.49822	0.000104975	0.00622215	0.00535824	1081	tags=27%, list=14%, signal=24%	Hba-a2/Hba-a1/Cxcl9/Fabp4/Fcer1g/Cyba/Cd52/Cfb/Isg15/Hp/Nfkbia/Mif/Wfdc17/Lilrb4a/Ear2/Slpi/Ptafr/Trem2/Cd68/Clec4e/Lyz2/Spi1/Cxcl16/Tnip3/Ifi205/Cebpb/Plac8/Pglyrp1/Nr1h3/Trem3/Ifi211/Rhoa/Gbp2/Ifi204/Cd36/Hck/Fau/Cd274/Slc11a1/Fgr/Vim/Cd47/Slc12a2/Cx3cr1/Ace/Axl/Snx3/Ifit3/Pycard/Rpl39/Bcl10/Il18/Cd14/B2m/Gpx1/Acp5/Lyn/Fcgr1/Spn/Slfn2/Psmb9/Rnase6/Ifit1/Rpl30/Slamf8/Gsdmd/Ppp1r11/Lpl/Bcl3/Mapka…	GO Biological Process
Monocytes	mmu05310	Asthma - Mus musculus (house mouse)	12	0.850193	1.87749	0.000479263	0.00628793	0.00510541	410	tags=58%, list=5%, signal=55%	H2-Eb1/H2-Ab1/H2-Aa/Fcer1g/H2-DMb1/Cd40/H2-DMa	Kegg Pathway
Monocytes	GO:0002697	regulation of immune effector process	235	0.476641	1.56828	0.000107296	0.00630243	0.00542738	1491	tags=34%, list=19%, signal=28%	Fcer1g/Hmox1/Cfb/Cd74/Dnase1l3/Tyrobp/Mif/Vamp8/Lilrb4a/H2-DMb1/Rap1a/Ptafr/H2-D1/Bst2/Cd300a/Trem2/Spi1/Il4i1/Pglyrp1/Hfe/Lgals3/Itgb2/Cd40/Cd36/Anxa1/Fgr/Ptprc/Cd47/Cx3cr1/Axl/Pycard/Pnp/Rsad2/Ceacam1/Ptpn6/Il18/B2m/Sh2d1b1/Ptprj/Acp5/Lyn/Fcgr1/Spn/Slamf8/Cuedc2/Itgam/Mapkapk2/Casp1/Rasgrp1/Stap1/Tnfsf13/Tfrc/Ndfip1/Cfp/Nfkbiz/Supt6/Casp4/H2-M3/Rps19/H2-K1/Cd244a/C1qbp/Tnfaip3/Cd81/Bcl6/Ddx21/C…	GO Biological Process
Monocytes	GO:1904092	regulation of autophagic cell death	7	0.930028	1.81177	0.000116592	0.00672725	0.00579321	469	tags=57%, list=6%, signal=54%	Atp6v0c/Trem2/Calm1/Calm2	GO Biological Process
Monocytes	GO:0008017	microtubule binding	131	-0.400176	-1.74583	0.000171067	0.00750162	0.00654924	878	tags=26%, list=11%, signal=23%	Kif1c/Reep4/Appbp2/Tpx2/Spag5/Rcc2/Stard9/Clasp1/Knstrn/Prc1/Hook3/Camsap2/Strbp/Cep350/Ckap5/Kif22/Tiam1/Rgs14/Gas2l3/Chp1/Nusap1/Kif20b/Mtus1/Zfp207/Cenpe/Numa1/Kif23/Krit1/Nin/Ndrg1/Kif15/Racgap1/Kif11/S100a8	GO Molecular Function
Monocytes	mmu05321	Inflammatory bowel disease - Mus musculus (house mouse)	31	0.712888	1.84251	0.000625911	0.00789611	0.00641115	480	tags=29%, list=6%, signal=27%	H2-Eb1/H2-Ab1/H2-Aa/Ifngr1/H2-DMb1/Jun/Il2rg/H2-DMa/Il18	Kegg Pathway
Monocytes	GO:0006909	phagocytosis	160	0.510064	1.63363	0.000164305	0.00873388	0.00752123	972	tags=29%, list=12%, signal=26%	Aif1/Fcer1g/Cyba/Cfb/Treml4/Tyrobp/Cd302/Rap1a/Cd300a/Itgb1/Trem2/Nr1h3/Itgb2/Cd36/Hck/Prtn3/Anxa1/Slc11a1/Tgm2/Fgr/Ptprc/Cd47/Il2rg/Ncf4/Axl/Lrp1/Snx3/Pycard/Myo1g/Bin2/Gm9733/Ptprj/Fcgr1/P2ry6/Msr1/Itgam/Atg3/Cdc42/Pot1b/Sirpb1c/Siglece/Stap1/Tm9sf4/Gm5150/Cfp/Rab5a	GO Biological Process
Monocytes	GO:0003777	microtubule motor activity	19	-0.70065	-2.06187	0.000261099	0.00922411	0.00805305	1554	tags=58%, list=20%, signal=47%	Kif4/Kif21b/Kif1b/Kif1c/Stard9/Kif22/Kif20b/Cenpe/Kif23/Kif15/Kif11	GO Molecular Function
Monocytes	GO:0018024	histone-lysine N-methyltransferase activity	32	-0.611934	-2.00921	0.000228513	0.00922411	0.00805305	2247	tags=66%, list=28%, signal=47%	Kmt2b/Setd5/Kmt5c/Suv39h1/Kmt2d/Kmt5a/Setd1a/Setdb1/Wdr82/Rbbp5/Kmt2c/Ash1l/Nsd1/Dot1l/Setd3/Setd2/Nsd2/Setd7/Kmt2a/Setd1b/Ezh2	GO Molecular Function
Monocytes	GO:0002039	p53 binding	56	-0.513394	-1.90305	0.000265196	0.00922411	0.00805305	1834	tags=50%, list=23%, signal=39%	Nop53/Cdkn2aip/Ppp1r13b/Kmt5a/Prmt5/Tep1/Sirt1/Mdm4/Gsk3b/Smarca4/Chd8/Taf1/Ptges3/Rnf20/Hdac1/Mdm2/Usp10/Psme3/Usp7/Htt/Crebbp/Rfwd3/Banp/Brd7/Hspd1/Eef2/Setd7/Ep300	GO Molecular Function
Monocytes	GO:0004298	threonine-type endopeptidase activity	11	0.850841	1.80851	0.000246689	0.00922411	0.00805305	600	tags=82%, list=8%, signal=76%	Psmb8/Psmb2/Psmb5/Psmb10/Psmb6/Psma4/Psmb3/Psmb1/Psmb9	GO Molecular Function
Monocytes	GO:0042277	peptide binding	147	0.508431	1.62314	0.000296973	0.00976712	0.00852712	1073	tags=25%, list=14%, signal=22%	H2-Eb1/H2-Ab1/H2-Aa/Cd74/Nfkbia/Itm2b/Ppib/Cst3/Clta/H2-D1/Ppia/Trem2/Rplp0/Fpr2/Pfdn5/Crip1/Itgb2/Cd36/Anxa5/Ctsb/Gsap/Cd14/Ctsl/Ramp1/Pfdn6/Gsr/Msr1/Pirb/Srp14/Cmklr1/Pfdn1/Tomm20/Hsd17b10/Pfdn2/H2-M3/Pex7/H2-K1	GO Molecular Function
Monocytes	GO:0007616	long-term memory	15	-0.759989	-2.0947	0.000195705	0.0101269	0.00872088	632	tags=33%, list=8%, signal=31%	Crebbp/Rgs14/Ccnd2/Lcn2/Apoe	GO Biological Process
Monocytes	GO:0035064	methylated histone binding	54	-0.511987	-1.88302	0.00038165	0.0110213	0.0096221	1737	tags=46%, list=22%, signal=36%	Ing3/Fmr1/Hdgfl2/Kdm4a/Kdm5a/Cbx7/Chd8/Taf1/Phf1/Rbbp5/Kmt2e/Pwwp2a/Suz12/Spin1/Dpf2/Ing1/Phf8/Ncapg2/Zmynd11/Cbx5/Kdm7a/Uhrf1/Cbx3/Bptf/Atrx	GO Molecular Function
Monocytes	GO:0140034	methylation-dependent protein binding	54	-0.511987	-1.88302	0.00038165	0.0110213	0.0096221	1737	tags=46%, list=22%, signal=36%	Ing3/Fmr1/Hdgfl2/Kdm4a/Kdm5a/Cbx7/Chd8/Taf1/Phf1/Rbbp5/Kmt2e/Pwwp2a/Suz12/Spin1/Dpf2/Ing1/Phf8/Ncapg2/Zmynd11/Cbx5/Kdm7a/Uhrf1/Cbx3/Bptf/Atrx	GO Molecular Function
Monocytes	GO:0019825	oxygen binding	7	0.905765	1.73547	0.000369415	0.0110213	0.0096221	289	tags=57%, list=4%, signal=55%	Hba-a1/Hbb-bt/Sod2/Park7	GO Molecular Function
Monocytes	GO:0023026	MHC class II protein complex binding	11	0.839908	1.78527	0.000441105	0.0118697	0.0103628	508	tags=64%, list=6%, signal=60%	H2-Eb1/H2-Ab1/H2-Aa/Cd74/H2-DMb1/H2-DMa/B2m	GO Molecular Function
Monocytes	GO:0002274	myeloid leukocyte activation	148	0.503415	1.60381	0.000268744	0.0134786	0.0116071	1097	tags=30%, list=14%, signal=27%	Aif1/Fcer1g/Hmox1/Dnase1l3/Tyrobp/Vamp8/Lilrb4a/Ifngr1/Ptafr/Cd300a/Trem2/Jun/Spi1/Nr1h3/Itgb2/Anxa1/Slc11a1/Fgr/Jund/Crlf2/Cx3cr1/Ifi35/Nmi/Cd48/Pycard/Bcl10/Ptpn6/Il18/Relb/Lyn/Lcp2/Ctsc/Itgam/Pirb/Casp1/Fcgr4/Milr1/Rasgrp1/Clec4d/Stap1/Snap23/Nampt/App/Gpr137b/Cd244a	GO Biological Process
Monocytes	mmu04142	Lysosome - Mus musculus (house mouse)	104	0.52261	1.5845	0.00118528	0.0138848	0.0112736	1559	tags=33%, list=20%, signal=26%	Atp6v0c/Acp2/Clta/Ctss/Cd68/Ctsz/Napsa/Slc11a1/Laptm4a/Atp6v0b/Ctsb/Lipa/Ctsh/Ctsl/Asah1/Acp5/Gm2a/Ctsc/Ctsa/Ppt1/Man2b1/Fuca1/Npc2/Lamp2/Scarb2/Ap4s1/Lamp1/Ppt2/Litaf/Ap3b1/Nagpa/Hexb/Ctsd/Lgmn	Kegg Pathway
Monocytes	mmu05152	Tuberculosis - Mus musculus (house mouse)	116	0.514882	1.57865	0.00115044	0.0138848	0.0112736	796	tags=25%, list=10%, signal=23%	H2-Eb1/H2-Ab1/H2-Aa/Fcer1g/Cd74/Atp6v0c/Ifngr1/H2-DMb1/Ctss/Bax/Clec4e/Cebpb/Itgax/Calm1/Itgb2/Rhoa/Atp6v0b/H2-DMa/Bcl10/Calm2/Il18/Cd14/Cycs/Fcgr1/Ciita/Itgam/Il10rb/Fcgr4/Camk2d	Kegg Pathway
Monocytes	GO:0050764	regulation of phagocytosis	75	0.591599	1.76428	0.000293872	0.0146263	0.0125955	946	tags=37%, list=12%, signal=33%	Fcer1g/Cyba/Cfb/Rap1a/Cd300a/Trem2/Cd36/Hck/Prtn3/Slc11a1/Tgm2/Fgr/Ptprc/Cd47/Il2rg/Lrp1/Snx3/Pycard/Gm9733/Ptprj/Fcgr1/Atg3/Pot1b/Sirpb1c/Siglece/Stap1/Gm5150/Cfp	GO Biological Process
Monocytes	GO:0061082	myeloid leukocyte cytokine production	46	0.651321	1.84142	0.000299883	0.014701	0.0126599	1590	tags=43%, list=20%, signal=35%	Fcer1g/Hmox1/Cd74/Mif/Cd36/Axl/Pycard/Acp5/Cuedc2/Mapkapk2/Casp1/Rasgrp1/Casp4/Bcl6/Ddx21/Litaf/Il1b/Tlr7/Ddx1/Myd88	GO Biological Process
Monocytes	GO:0002224	toll-like receptor signaling pathway	84	0.568934	1.7178	0.000325822	0.0156515	0.0134784	1590	tags=44%, list=20%, signal=36%	Cyba/Treml4/Nfkbia/Smpdl3b/Irf7/Cd300a/Trem2/Tnip3/Nr1h3/Cd40/Cd36/Pik3ap1/Ninj1/Ifi35/Nmi/Bcl10/Rsad2/Cd14/Lyn/Gps2/Mapkapk2/Tnip1/Oas1a/App/Tnfaip3/Flot1/Ly96/Rab11fip2/Appl1/Havcr2/Tlr13/Cd300lf/Lgals9/Arf6/Ap3b1/Tlr7/Myd88	GO Biological Process
Monocytes	GO:0006007	glucose catabolic process	17	0.793534	1.8697	0.000338013	0.0159699	0.0137526	1071	tags=53%, list=14%, signal=46%	Aldoa/Eno1/Gapdh/Tpi1/Eno3/Ldha/Pgk1/Pkm/Pfkl	GO Biological Process
Monocytes	GO:0050853	B cell receptor signaling pathway	53	-0.511403	-1.90337	0.000344513	0.0160444	0.0138168	515	tags=34%, list=7%, signal=32%	Mapk1/Ighg2b/Blnk/Cd79b/Tec/Lck/Iglc3/Igha/Foxp1/Cd22/Blk/Igkc/Iglc2/Ighd/Cd79a/Ms4a1/Cd19/Ighm	GO Biological Process
Monocytes	GO:0034220	ion transmembrane transport	297	0.44958	1.49421	0.000343264	0.0160444	0.0138168	1089	tags=22%, list=14%, signal=20%	Cxcl9/Atox1/Cyba/Atp6v0c/Ifngr1/Atp5g1/Ctss/Ptafr/Sri/Bax/Itgb1/Trem2/Clic1/Fxyd5/Hfe/Calm1/Atp6v0e/Vdac2/Atp1a1/Iscu/Slc11a1/Cybb/Atp6v1g1/Mpc2/Park7/Ptprc/Atp6v0b/Atp5g2/Slc12a2/Atp5d/Atp6v1f/Rnasek/P2rx4/Arl6ip5/Mpc1/Ptpn6/Calm2/Slc25a4/Gsto1/Atp5b/Smdt1/Sumo1/Ndufa4/Lyn/Commd1/Clec4b1/P2ry6/Ndufs7/Slc16a3/Cfl1/Atp6v1e1/Ptk2b/Dbi/Slc25a11/Camk2d/Arf1/Flna/Mcur1/Slc3a2/S100a1/Clic4/App/Slc25a5/…	GO Biological Process
Monocytes	GO:0060828	regulation of canonical Wnt signaling pathway	110	-0.398223	-1.68004	0.000378019	0.0170375	0.014672	1934	tags=40%, list=25%, signal=31%	Ptpro/Scyl2/Sulf2/Ccdc88c/Ccar2/Tnks/Prdm15/Tgfb1/Tmem64/Ppm1b/Gsk3a/Ctnnb1/Zeb2/Gsk3b/Tnks2/Ccny/Csnk1g3/Chd8/Rnf220/Lats2/Lrrk2/Apc/Hdac1/Csnk1d/Jade1/Hdac2/Foxo1/Mapk14/Cyld/Wls/Lats1/Rps12/Tbl1xr1/Xiap/Ddx3x/Vcp/Slc9a3r1/Tle3/Zfp703/Nfkb1/Wnk1/Limd1/Notch1/Apoe	GO Biological Process
Monocytes	GO:0033006	regulation of mast cell activation involved in immune response	24	0.74158	1.86935	0.000385784	0.017111	0.0147352	568	tags=33%, list=7%, signal=31%	Fcer1g/Hmox1/Vamp8/Lilrb4a/Cd300a/Fgr/Ptpn6/Lyn	GO Biological Process
Monocytes	GO:0045930	negative regulation of mitotic cell cycle	143	-0.362577	-1.57295	0.000385069	0.017111	0.0147352	1632	tags=37%, list=21%, signal=30%	Wac/Spc24/Donson/Casp2/Xpc/Gigyf2/Zc3h12d/Ctnnb1/Taok2/Inip/Ints3/Gen1/Atm/Bard1/Cdc73/Zw10/Rpa2/Cep192/Apc/Msh2/Plk1/Ctdspl/Jade1/Heca/Mdm2/Map3k20/Ctdsp2/Ccng1/Pml/Foxo4/Bub1b/Clspn/Mad2l1/Ctdsp1/Fbxo5/Trim39/Aurkb/Ppp2r5c/Spc25/Slc9a3r1/Rfwd3/Rbl1/Scrib/Rbm38/Incenp/Brd7/Topbp1/Zfp207/Cenpe/Ezh2/Cdt1/Rad21/Zfp36l2	GO Biological Process
Monocytes	GO:0006302	double-strand break repair	184	-0.337237	-1.5591	0.000410715	0.0178524	0.0153737	1808	tags=35%, list=23%, signal=28%	Rev3l/Mta1/Trrap/Slf2/Ing3/Iffo1/Rmi1/Mlh1/Hdgfl2/Arid2/Actr8/Mcm4/Mms19/Rad51ap1/Arid1b/Pot1a/Inip/Mms22l/Smarca4/Fus/Helb/Ints3/Gen1/Atm/Cdc45/Rpa2/Smc5/Msh2/Dek/Ppp4r3b/Pml/Zbtb7a/Parp1/Dpf2/Xrcc1/Dna2/Hpf1/Setd2/Vcp/Ppp4r2/Brd8/Kdm2a/Nsd2/Rpa1/Dclre1b/Lig1/Rif1/Nipbl/Nucks1/Rad54l/Mcm7/Rfwd3/Marf1/Mcm2/Foxm1/Brd7/Smchd1/Mcm3/Mcm6/Pbrm1/Rad21/Smarcd2/Sfpq/Arid1a/Mcm5	GO Biological Process
Monocytes	GO:0017116	single-stranded DNA helicase activity	15	-0.72147	-2.03753	0.000799043	0.0193075	0.0168563	1846	tags=73%, list=23%, signal=56%	Dhx9/Mcm4/Wrnip1/Helb/Rfc2/Dna2/Mcm7/Mcm2/Mcm3/Mcm6/Mcm5	GO Molecular Function
Monocytes	GO:0003730	mRNA 3'-UTR binding	71	-0.443483	-1.71304	0.000781361	0.0193075	0.0168563	1012	tags=34%, list=13%, signal=30%	Hnrnpk/Fxr2/Ilf3/Syncrip/Hnrnpl/Rc3h1/Taf15/Pum1/Pabpc4/Khsrp/Elavl1/Tial1/Hnrnpr/Rbms1/Rbm38/Hnrnpc/Hnrnpa2b1/Larp4b/Pum2/Pabpc1/Celf2/Tardbp/Celf1/Zfp36l2	GO Molecular Function
Monocytes	GO:0005324	long-chain fatty acid transporter activity	9	0.844786	1.71271	0.000792569	0.0193075	0.0168563	223	tags=33%, list=3%, signal=32%	Fabp4/Fabp5/Cd36	GO Molecular Function
Monocytes	GO:0051321	meiotic cell cycle	109	-0.412504	-1.71632	0.000485211	0.0201502	0.0173524	1682	tags=38%, list=21%, signal=30%	Rmi1/Smc3/Mlh1/Pdik1l/Ppp2r1a/Terf1/Foxj2/Tubgcp3/Rad51ap1/Prkacb/Sgo1/Cdc25a/Atm/Dicer1/Plk1/Tubgcp4/Sun1/Stag2/Pkmyt1/Ndc1/Igf1r/Nr2c2/Spin1/Bub1b/Fbxo5/Cdk2/Rpa1/Rad54l/Ncaph2/Marf1/Zfp318/Incenp/Topbp1/Cenpe/Smc2/Smc4/Sun2/Ncapd2/Atrx/Mki67/Top2a	GO Biological Process
Monocytes	GO:1901991	negative regulation of mitotic cell cycle phase transition	118	-0.385031	-1.63763	0.000489469	0.0201983	0.0173939	1632	tags=39%, list=21%, signal=31%	Wac/Spc24/Donson/Casp2/Gigyf2/Zc3h12d/Taok2/Inip/Ints3/Gen1/Atm/Bard1/Cdc73/Zw10/Rpa2/Cep192/Apc/Plk1/Ctdspl/Jade1/Mdm2/Ctdsp2/Ccng1/Pml/Foxo4/Bub1b/Clspn/Mad2l1/Ctdsp1/Fbxo5/Trim39/Aurkb/Ppp2r5c/Spc25/Rfwd3/Rbl1/Rbm38/Incenp/Brd7/Topbp1/Zfp207/Cenpe/Ezh2/Cdt1/Rad21/Zfp36l2	GO Biological Process
Monocytes	GO:1902253	regulation of intrinsic apoptotic signaling pathway by p53 class mediator	23	0.74386	1.86892	0.000511308	0.0207064	0.0178314	411	tags=30%, list=5%, signal=29%	Ubb/Cd74/Mif/Rpl11/Rps7/Rpl26/Sh3glb1	GO Biological Process
Monocytes	GO:0006735	NADH regeneration	13	0.83401	1.85229	0.000530008	0.0208172	0.0179268	1071	tags=62%, list=14%, signal=53%	Aldoa/Eno1/Gapdh/Tpi1/Eno3/Pgk1/Pkm/Pfkl	GO Biological Process
Monocytes	GO:0061621	canonical glycolysis	13	0.83401	1.85229	0.000530008	0.0208172	0.0179268	1071	tags=62%, list=14%, signal=53%	Aldoa/Eno1/Gapdh/Tpi1/Eno3/Pgk1/Pkm/Pfkl	GO Biological Process
Monocytes	GO:0050730	regulation of peptidyl-tyrosine phosphorylation	118	0.524782	1.63559	0.000524031	0.0208172	0.0179268	1281	tags=34%, list=16%, signal=29%	Cd74/Mif/Lilrb4a/Csf1r/Clec4n/Socs3/Cd300a/Itgb1/Trem2/Samsn1/Ptpn1/Itgb2/Abi3/Parp14/Cd40/Cd36/Ptprc/Unc119/Icam1/Ace/Sema4d/Ptpn6/Il18/Sh2d1b1/Mvp/Ptprj/Lyn/Ptk2b/Cd44/Ehd4/Pdgfb/Hcls1/Lilra5/App/Cblb/Parp9/Cd81/Fyn/Adam17/Hax1	GO Biological Process
Monocytes	mmu05169	Epstein-Barr virus infection - Mus musculus (house mouse)	160	0.476084	1.50266	0.00197856	0.0223782	0.0181697	1371	tags=32%, list=18%, signal=27%	H2-Eb1/H2-Ab1/H2-Aa/Isg15/Nfkbia/Psmd8/H2-DMb1/Irf7/H2-D1/Bax/Jun/Sap30/Cd40/Vim/Icam1/H2-DMa/Gadd45b/B2m/Relb/Lyn/Cycs/Psmd4/Psmc4/Psmd12/Ifnar2/Cdkn1a/Nfkbie/Psmd14/Psmc5/Cd44/Pdia3/Psmc2/Psmd7/Eif2ak2/Nfkbib/Oas1a/Sem1/H2-M3/H2-K1/Itgal/Tnfaip3/Fas/Nfkb2/Calr/Rac1/Psmd6/H2-Eb2/Psmd11/H2-T23/Fadd/Tbk1	Kegg Pathway
Monocytes	GO:0051279	regulation of release of sequestered calcium ion into cytosol	32	0.689523	1.8418	0.000603637	0.0235672	0.020295	806	tags=44%, list=10%, signal=39%	Cxcl9/Cyba/Sri/Bax/Calm1/Ptpn6/Calm2/Gsto1/Lyn/Clec4b1/P2ry6/Ptk2b/Dbi/Camk2d	GO Biological Process
Monocytes	GO:0140657	ATP-dependent activity	296	-0.294434	-1.4333	0.00105573	0.0245095	0.0213979	1357	tags=29%, list=17%, signal=25%	Macf1/Smarca4/Hyou1/Kif21b/Chd8/Wrnip1/Helb/Atp9b/Kif1b/Abcb7/Smc5/Abca3/Dicer1/Helz/Msh2/Dhx40/Myo9a/Atad5/Abce1/Atp2a2/Tor1b/Dhx30/Atp8b4/Atp8b2/Dhx38/Myo9b/Hells/Rfc2/Srcap/Hspa8/Ercc6l/Kif1c/Ddx3y/Stard9/Ddx55/Dhx15/Tmem30a/Pikfyve/Dna2/Hsp90ab1/Atp6v1a/Ddx3x/Ddx39b/Shprh/Pex6/Vcp/Abca9/Kif22/Rsf1/Abcb1b/Rad54l/Mcm7/Atp13a3/Hltf/Mcm2/Hspd1/Hspa4l/Abca7/Atp6v1b2/Smchd1/Kif20b/Atf7ip/Mcm3/Cenpe…	GO Molecular Function
Monocytes	GO:0042054	histone methyltransferase activity	39	-0.549077	-1.91512	0.001101	0.0248533	0.021698	1646	tags=59%, list=21%, signal=47%	Kmt2b/Setd5/Kmt5c/Suv39h1/Kmt2d/Kmt5a/Prmt5/Setd1a/Setdb1/Wdr82/Rbbp5/Suz12/Kmt2c/Ash1l/Nsd1/Dot1l/Setd3/Setd2/Nsd2/Setd7/Kmt2a/Setd1b/Ezh2	GO Molecular Function
Monocytes	GO:0019003	GDP binding	51	0.59967	1.71208	0.00111252	0.0248533	0.021698	1687	tags=45%, list=21%, signal=36%	Nme2/Rap1a/Rap1b/Rhoa/Gbp2/Rras/Rheb/Rab2a/Arf1/Kras/Suclg1/Rab10/Rab5a/Rala/Rab5c/Rab9/Rab8a/Rap2b/Arf6/Rap2c/Rab7/Rab18/Rit1	GO Molecular Function
Monocytes	GO:0014812	muscle cell migration	59	0.597236	1.7376	0.000673031	0.0253651	0.0218433	978	tags=34%, list=12%, signal=30%	Aif1/S100a11/Tmsb4x/Naca/Nfe2l2/Rhoa/Anxa1/Park7/Arpc2/Ace/Lrp1/Il18/Dock5/Itga4/P2ry6/Bin3/Gstp1/Camk2d/Pdgfb/Trib1	GO Biological Process
Monocytes	GO:0032489	regulation of Cdc42 protein signal transduction	5	-0.936572	-1.87604	0.000680416	0.025496	0.0219561	342	tags=40%, list=4%, signal=38%	Nrp1/Apoe	GO Biological Process
Monocytes	GO:0001906	cell killing	95	0.546405	1.66746	0.000694703	0.0257356	0.0221623	1388	tags=40%, list=18%, signal=33%	Cxcl9/Dnase1l3/Tyrobp/Gapdh/Prdx1/H2-D1/Lyz2/Spi1/Pglyrp1/Lgals3/Trem3/Ptprc/Cx3cr1/Pnp/Ceacam1/Ptpn6/Il18/Ctsh/B2m/Sh2d1b1/Rnf19b/Fcgr1/Ctsc/Rpl30/Itgam/Rasgrp1/Stap1/Romo1/H2-M3/Rps19/H2-K1/Hprt/Cr1l/Havcr2/H2-T23/Fadd/Lamp1/Lgals9	GO Biological Process
Monocytes	GO:0071222	cellular response to lipopolysaccharide	129	0.509792	1.60034	0.000736369	0.0265255	0.0228426	978	tags=26%, list=12%, signal=23%	Cxcl9/Nfkbia/Mif/Lilrb4a/Trem2/Cd68/Spi1/Cxcl16/Tnip3/Cebpb/Nr1h3/Rhoa/Gbp2/Cd36/Cd274/Vim/Slc12a2/Cx3cr1/Axl/Pycard/Bcl10/Il18/Cd14/B2m/Lyn/Casp1/Gstp1/Fcgr4/Mtdh/Stap1/Tnip1/Nfkbib/Trib1	GO Biological Process
Monocytes	GO:0031347	regulation of defense response	328	0.433253	1.44758	0.000732521	0.0265255	0.0228426	1191	tags=27%, list=15%, signal=24%	Fabp4/Fcer1g/Cyba/Treml4/Cd74/Isg15/Dnase1l3/Nfkbia/Tyrobp/Nupr1/Vamp8/Smpdl3b/Irf7/Ctss/Clec4n/Socs3/Trem2/Spi1/Ifi205/Cebpb/Metrnl/Pglyrp1/Nr1h3/Trem3/Ifi207/Lgals1/Nfe2l2/Parp14/Ifi211/Ifi204/Gpx4/Anxa1/Zbp1/Fgr/Park7/Tnfaip8l2/Pik3ap1/Cd47/Ndufc2/Ninj1/Selenok/Cx3cr1/Ace/Ifi35/Nmi/Pycard/Abhd12/Alox5ap/Ceacam1/Hpse/Il18/Sh2d1b1/Gpx1/Acp5/Lyn/Fcgr1/Spn/Banf1/Ctsc/Slamf8/Lpl/Gps2/Casp1/Gstp1/Cd…	GO Biological Process
Monocytes	mmu04216	Ferroptosis - Mus musculus (house mouse)	27	0.693683	1.75844	0.00254165	0.0277887	0.0225627	927	tags=41%, list=12%, signal=36%	Ftl1/Fth1/Hmox1/Sat1/Vdac2/Gpx4/Cybb/Map1lc3b/Vdac3/Tfrc/Slc3a2	Kegg Pathway
Monocytes	GO:0034502	protein localization to chromosome	78	-0.454641	-1.8542	0.000802084	0.028268	0.0243432	1804	tags=47%, list=23%, signal=37%	Rb1/Tnks/Slf2/Tcp1/Iffo1/Pih1d1/Mau2/Terf1/Chmp7/Cct7/Pot1a/Cenpa/Tnks2/Ctcf/Zw10/Rpa2/Smc5/Msh2/Plk1/Terf2/Pml/Cdk9/Tasor/Bub1b/Rcc2/Aurkb/Setd2/Vcp/Vcpip1/Rpa1/Nipbl/Mis12/Ezh2/Cdt1/Knl1/Rad21/Atrx	GO Biological Process
Monocytes	GO:0006376	mRNA splice site selection	22	-0.680574	-2.07602	0.00084072	0.0290026	0.0249758	479	tags=41%, list=6%, signal=39%	Luc7l/Khdc4/Psip1/Srsf6/Luc7l3/Mbnl1/Srsf1/Celf2/Celf1	GO Biological Process
Monocytes	GO:0033003	regulation of mast cell activation	31	0.688139	1.83315	0.000850214	0.0291758	0.0251249	568	tags=29%, list=7%, signal=27%	Fcer1g/Hmox1/Vamp8/Lilrb4a/Cd300a/Fgr/Crlf2/Ptpn6/Lyn	GO Biological Process
Monocytes	GO:0051784	negative regulation of nuclear division	33	-0.583361	-1.94469	0.000864354	0.0295057	0.025409	1300	tags=48%, list=16%, signal=41%	Gen1/Atm/Zw10/Cep192/Apc/Plk1/Bub1b/Mad2l1/Fbxo5/Aurkb/Spc25/Incenp/Zfp207/Cenpe/Cdt1/Rad21	GO Biological Process
Monocytes	GO:0048029	monosaccharide binding	44	0.62055	1.73777	0.00138801	0.0298801	0.0260866	1071	tags=43%, list=14%, signal=38%	Aldoa/Clec4n/Lgals3/Lgals1/Clec4a3/Dpm1/Clec4a1/Pgls/Clec4b1/Bsg/Taldo1/Clec4a2/Siglece/Pygl/Clec4d/Man2b1/Phyh/P4ha1/Pfkl	GO Molecular Function
Monocytes	GO:0004129	cytochrome-c oxidase activity	10	0.830262	1.72683	0.00146447	0.0309631	0.0270322	1121	tags=80%, list=14%, signal=69%	Cox8a/Cox5a/Cox7b/Cox6c/Cox7c/Cox7a2/Cox4i1/Cox6a1	GO Molecular Function
Monocytes	GO:1990247	N6-methyladenosine-containing RNA binding	7	-0.850335	-1.86576	0.00153559	0.0318972	0.0278477	514	tags=71%, list=7%, signal=67%	Ythdc2/Ythdf1/Hnrnpc/Ythdf3/Hnrnpa2b1	GO Molecular Function
Monocytes	mmu05132	Salmonella infection - Mus musculus (house mouse)	188	0.458883	1.45553	0.00309576	0.0327551	0.0265952	1463	tags=31%, list=19%, signal=26%	Nfkbia/Pfn1/Gapdh/Arpc3/Bax/Jun/Txn1/Brk1/Cyth3/Rps3/Arpc1b/Rhoa/Fos/Myl12a/Rras/Ptprc/Myl12b/Arpc2/Tcf7l2/Pycard/Il18/Cd14/Cycs/Actb/Gsdmd/Dctn3/Dync1i2/Arpc4/Casp1/Cdc42/Arf1/S100a10/Cyfip2/Actr10/Flna/Arpc1a/Dynlt1f/Rab5a/Dynll1/Casp4/Dynlt3/Birc3/Dctn2/Rala/Cyfip1/Arpc5/Dynlrb1/Ly96/Dynlt1c/Rac1/Rab5c/Cyth4/Fadd/Rab9/Map2k2/Arpc5l/Arf6/Dctn6/Il1b	Kegg Pathway
Monocytes	GO:0008544	epidermis development	111	-0.383894	-1.62375	0.0010077	0.032851	0.0282898	1253	tags=32%, list=16%, signal=28%	Sos1/Lats2/Dicer1/Apc/Hdac1/Casp3/Hdac2/Plec/Igf1r/Slc4a7/Rock2/Sgpp1/Lats1/Bcr/Runx3/Ripor2/Zdhhc21/Plod3/Ugcg/Slc9a3r1/Trps1/Bcl11b/Scrib/Ppp3ca/Rock1/Ldb1/Srsf6/Ezh2/Numa1/Runx1/Pum2/Satb1/Notch1/Psap/Fosl2/Sod1	GO Biological Process
Monocytes	GO:0032101	regulation of response to external stimulus	448	0.412915	1.38359	0.00100526	0.032851	0.0282898	1191	tags=26%, list=15%, signal=24%	Aif1/Pla2g7/Fabp4/Fcer1g/Cyba/Treml4/Cd74/Isg15/Dnase1l3/Nfkbia/Tyrobp/Mif/Nupr1/Vamp8/Csf1r/Smpdl3b/Irf7/Ctss/Clec4n/Socs3/Cd9/Bax/Trem2/Spi1/Ifi205/Cebpb/Metrnl/Pglyrp1/Nr1h3/Trem3/Ifi207/Lgals1/Nfe2l2/Parp14/Ifi211/Ifi204/Cd36/Gpx4/Dusp1/Anxa1/Anxa5/Zbp1/Fgr/Park7/Tnfaip8l2/Pik3ap1/Cd47/Slc12a2/Ndufc2/Ninj1/Selenok/Cx3cr1/Ace/Lrp1/Ifi35/Nmi/P2rx4/Pycard/Abhd12/Alox5ap/Ceacam1/Sema4d/Hpse/Il18/…	GO Biological Process
Monocytes	mmu04514	Cell adhesion molecules - Mus musculus (house mouse)	49	0.604868	1.69175	0.00336484	0.0344896	0.0280034	1070	tags=43%, list=14%, signal=37%	H2-Eb1/H2-Ab1/H2-Aa/H2-DMb1/H2-D1/Itgb1/Itgb2/Cd40/Cd274/Ptprc/Icam1/H2-DMa/Spn/Sdc4/Itga4/F11r/Itgam/Sdc3/H2-M3/H2-K1/Itgal	Kegg Pathway
Monocytes	GO:0030174	regulation of DNA-templated DNA replication initiation	11	-0.800535	-2.01363	0.00112734	0.0353071	0.0304049	607	tags=82%, list=8%, signal=76%	Mcm4/Wrnip1/Cdk2/Mcm7/Mcm2/Mcm3/Mcm6/Cdt1/Mcm5	GO Biological Process
Monocytes	GO:0031058	positive regulation of histone modification	88	-0.417647	-1.72368	0.00121116	0.0372487	0.032077	1992	tags=43%, list=25%, signal=33%	Lpin1/Kansl1/Akap8/Nelfa/Sphk2/Suv39h1/Men1/Tgfb1/Pih1d1/Baz2a/Paxip1/Ctnnb1/Sirt1/Chtop/Mapk3/Kansl2/Phf1/Lrrk2/Rnf20/Dek/Kmt2e/Asxl2/Pml/Cdk9/Arid5a/Hcfc1/Arrb1/Prkd2/Ctbp1/Kdm2a/Rif1/Nipbl/Brd7/Dnmt1/Baz1b/Kmt2a/Ogt/Xbp1	GO Biological Process
Monocytes	GO:0042273	ribosomal large subunit biogenesis	63	0.578314	1.69211	0.00120778	0.0372487	0.032077	1205	tags=32%, list=15%, signal=27%	Rpl10/Rplp0/Rpl11/Rpl24/Eif6/Rpl26/Rpl14/Rpl10a/Mrpl20/Rpl35/Snu13/Rpl6/Rpl7a/Malsu1/Nsa2/Pak1ip1/Nhp2/Rpl7/Rpl38/Ebna1bp2	GO Biological Process
Monocytes	GO:0038024	cargo receptor activity	27	0.678344	1.75963	0.00198672	0.03794	0.0331233	1099	tags=52%, list=14%, signal=45%	Cxcl16/Fpr2/Itgb2/Cd36/Lrp1/Atp5b/Lgals3bp/Msr1/Apobr/Itgam/Cd44/Tfrc/Mia2/Scarb2	GO Molecular Function
Monocytes	GO:0045839	negative regulation of mitotic nuclear division	32	-0.58757	-1.94129	0.00131022	0.0383077	0.0329889	1300	tags=50%, list=16%, signal=42%	Gen1/Atm/Zw10/Cep192/Apc/Plk1/Bub1b/Mad2l1/Fbxo5/Aurkb/Spc25/Incenp/Zfp207/Cenpe/Cdt1/Rad21	GO Biological Process
Monocytes	GO:0002269	leukocyte activation involved in inflammatory response	26	0.699017	1.79865	0.00126362	0.0383077	0.0329889	1026	tags=46%, list=13%, signal=40%	Aif1/Tyrobp/Ifngr1/Trem2/Jun/Cx3cr1/Ctsc/Itgam/Casp1/Stap1/Nampt/App	GO Biological Process
Monocytes	GO:0014910	regulation of smooth muscle cell migration	47	0.625062	1.77246	0.00130189	0.0383077	0.0329889	978	tags=34%, list=12%, signal=30%	Aif1/S100a11/Tmsb4x/Nfe2l2/Rhoa/Park7/Arpc2/Ace/Lrp1/Il18/Dock5/P2ry6/Gstp1/Camk2d/Pdgfb/Trib1	GO Biological Process
Monocytes	GO:0002695	negative regulation of leukocyte activation	113	0.512063	1.59082	0.00128489	0.0383077	0.0329889	589	tags=23%, list=7%, signal=22%	H2-Aa/Lst1/Hmox1/Cd74/Tyrobp/Lilrb4a/Cd300a/Spi1/Samsn1/Cebpb/Il4i1/Pglyrp1/Hfe/Nr1h3/Lgals3/Cd274/Anxa1/Fgr/Tnfaip8l2/Axl/Ceacam1/Ptpn6/Slfn1/Lyn/Spn/Sdc4	GO Biological Process
Monocytes	GO:0006310	DNA recombination	179	-0.332318	-1.53977	0.00129582	0.0383077	0.0329889	1808	tags=37%, list=23%, signal=29%	Rev3l/Tgfb1/Trrap/Ing3/Ino80d/Dcaf1/Rmi1/Mlh1/Hdgfl2/Arid2/Actr8/Mcm4/Ercc2/Paxip1/Tep1/Mms19/Rad51ap1/Slc15a4/Inip/Mms22l/Fus/Helb/Ints3/Gen1/Atm/Bard1/Cdc45/Rpa2/Smc5/Msh2/Icosl/Terf2/Atad5/Clcf1/Rhno1/Parp1/Xrcc1/Swap70/Tcf3/Setd2/Ppp4r2/Brd8/Nsd2/Rpa1/Lig1/Rif1/Nipbl/Nucks1/Rad54l/Mcm7/Rfwd3/Bcl11b/Nono/Mcm2/Hspd1/Topbp1/Smchd1/Mcm3/Ezh2/Mcm6/Foxp1/Rad21/Sfpq/Mcm5/Hmgb2/Top2a	GO Biological Process
Monocytes	GO:0032787	monocarboxylic acid metabolic process	246	0.45068	1.48209	0.00130679	0.0383077	0.0329889	1311	tags=24%, list=17%, signal=21%	Fabp4/Cd74/Fabp5/Aldoa/Mif/Eno1/Gapdh/Nupr1/Hpgd/Il4i1/Nr1h3/Cd36/Eif6/Gpx4/Tpi1/Anxa1/Mpc2/Park7/Eno3/Ldha/Lipa/Alox5ap/Cyb5a/Ceacam1/Mpc1/Tecr/Slc2a6/Gpx1/Asah1/Pdk3/Lpl/Pgk1/Gstp1/Etfb/Pgam1/Dbi/Acot9/Ndufab1/Ech1/Pkm/Phyh/Akr1a1/Pex2/Nfe2l1/Hsd17b10/App/Pex7/Gk/Pfkl/Adh5/Nucb2/Eci2/Acaa1a/Acat1/Hif1a/Prxl2b/Hagh/Hadha/Cyp4v3	GO Biological Process
Monocytes	GO:0070192	chromosome organization involved in meiotic cell cycle	23	-0.650884	-1.98645	0.0013633	0.0393307	0.0338698	1672	tags=57%, list=21%, signal=45%	Mlh1/Ppp2r1a/Terf1/Sgo1/Atm/Sun1/Ndc1/Bub1b/Ncaph2/Smc2/Smc4/Ncapd2/Atrx	GO Biological Process
Monocytes	GO:0002718	regulation of cytokine production involved in immune response	69	0.567828	1.6837	0.00140524	0.040185	0.0346056	1648	tags=41%, list=21%, signal=32%	Fcer1g/Hmox1/Cd74/Mif/Lilrb4a/Bst2/Hfe/Cd36/Axl/Pycard/Rsad2/Il18/B2m/Acp5/Cuedc2/Mapkapk2/Casp1/Casp4/Cd81/Bcl6/Ddx21/Litaf/Atg5/Il1b/Tlr7/Ddx1/Myd88/Lacc1	GO Biological Process
Monocytes	GO:0050839	cell adhesion molecule binding	92	0.520067	1.58976	0.00213974	0.0402135	0.0351082	1534	tags=40%, list=19%, signal=33%	Isg15/Mmp14/Lilrb4a/Ppia/Cd9/Itgb1/Fxyd5/Itgax/Itgb2/Lcp1/Cd47/Ninj1/Icam1/Tln1/Msn/P2rx4/Ptpn6/Shtn1/Ptprj/Lyn/Itga4/F11r/Itgam/Pirb/Bsg/App/Itgal/Cd81/Calr/Rpsa/Itgb5/Adam17/Itgav/Pira2/Il1b/Ptpn2/Afdn	GO Molecular Function
Monocytes	GO:0002322	B cell proliferation involved in immune response	6	-0.893651	-1.90032	0.0014518	0.0410696	0.0353673	625	tags=33%, list=8%, signal=31%	Gapt/Cd19	GO Biological Process
Monocytes	GO:0048048	embryonic eye morphogenesis	13	-0.772856	-2.04083	0.00146416	0.0411479	0.0354348	795	tags=38%, list=10%, signal=35%	Sp1/Sp3/Kdm2b/Arid1a/Hipk1	GO Biological Process
Monocytes	GO:0048821	erythrocyte development	25	0.70287	1.79802	0.00151503	0.0421607	0.0363069	3	tags=8%, list=0%, signal=8%	Hba-a2/Hba-a1	GO Biological Process
Monocytes	GO:0070664	negative regulation of leukocyte proliferation	53	0.580964	1.67479	0.00158473	0.0430519	0.0370744	1388	tags=42%, list=18%, signal=34%	H2-Aa/Lst1/Tyrobp/Lilrb4a/Cd300a/Cebpb/Il4i1/Cd274/Ceacam1/Ptpn6/Slfn1/Lyn/Spn/Sdc4/Gstp1/Cd44/Ndfip1/Cblb/Bcl6/Tmem131l/Havcr2/Lgals9	GO Biological Process
Monocytes	GO:0043300	regulation of leukocyte degranulation	36	0.658373	1.79647	0.00161824	0.0434194	0.0373908	714	tags=28%, list=9%, signal=25%	Fcer1g/Hmox1/Vamp8/Ptafr/Cd300a/Spi1/Itgb2/Fgr/Lyn/Itgam	GO Biological Process
Monocytes	GO:1904706	negative regulation of vascular associated smooth muscle cell proliferation	17	0.75338	1.77509	0.00168359	0.0444413	0.0382709	753	tags=35%, list=10%, signal=32%	Hmox1/Sod2/Rhoa/Park7/Cdkn1a/Gstp1	GO Biological Process
Monocytes	GO:0006875	cellular metal ion homeostasis	181	0.458772	1.48016	0.00168292	0.0444413	0.0382709	1492	tags=30%, list=19%, signal=25%	Cxcl9/Ftl1/Fth1/Atox1/Cyba/Hmox1/Sri/Bax/Hfe/Calm1/Cd40/Fis1/Atp1a1/Iscu/Slc11a1/Tgm2/Atp6v1g1/Ptprc/Slc12a2/Mt1/Nubp1/Selenok/Ptpn6/Calm2/Gsto1/Smdt1/Lyn/Commd1/Clec4b1/P2ry6/Ptk2b/Dbi/Camk2d/Bcap31/Flna/Mcur1/Tfrc/Ndfip1/App/Bola2/Mcub/Nucb2/Ccdc115/Hif1a/Micu2/Stoml2/Glrx3/Atp1a3/Itgav/Tmem203/Ryr1/Slc8a1/Atg5/Ap3b1	GO Biological Process
Monocytes	GO:0048667	cell morphogenesis involved in neuron differentiation	221	-0.305423	-1.40729	0.00167423	0.0444413	0.0382709	1000	tags=21%, list=13%, signal=19%	Igf1r/Rere/Usp9x/Rock2/Bmpr2/Dvl1/Rhoh/Dlg4/Emb/Olfm1/Cnp/Runx3/Ripor2/Hsp90ab1/Trio/Gdi1/Stmn1/Sema4b/Id1/Ythdf1/Tiam1/Twf2/Slc9a3r1/Mark2/Bcl11b/Met/Scrib/Ppp3ca/Nrp1/Ube3a/Hexa/Cit/Raph1/Foxp1/Creb1/Dock10/Ywhah/Nin/Ablim1/Notch1/Cxcr4/Hsp90aa1/Bcl11a/Sod1/Fn1/Apoe	GO Biological Process
Monocytes	GO:0034249	negative regulation of cellular amide metabolic process	138	-0.353681	-1.53897	0.00169379	0.0445303	0.0383475	1242	tags=31%, list=16%, signal=27%	Cnot8/Tob1/Mettl16/Ormdl1/Cnot3/Rara/Csde1/Pml/Fxr2/Cnot1/Rock2/Eif4enif1/Cnot10/Ilf3/Pan2/Syncrip/Rgs2/Rc3h1/Fto/Pum1/Eif4ebp2/Ddx3x/Ireb2/Rc3h2/Khsrp/Ythdf1/Hnrnpr/Tnrc6b/Ythdf3/Abca7/Rock1/Cnot6l/Pan3/Sorl1/Cnot6/Ddx6/Bank1/Ago2/Pabpc1/Tardbp/Celf1/Zfp36l2/Apoe	GO Biological Process
Monocytes	GO:0072332	intrinsic apoptotic signaling pathway by p53 class mediator	61	0.582282	1.70017	0.00171683	0.0449547	0.038713	792	tags=26%, list=10%, signal=24%	Ubb/Cd74/Mif/Nupr1/Bax/Rpl11/Ifi207/Rps7/Ifi204/Rpl26/Sh3glb1/Pycard/Hint1/Cdkn1a/Bcl3/Cd44	GO Biological Process
Monocytes	GO:0050867	positive regulation of cell activation	241	0.445111	1.46396	0.0017357	0.0452671	0.038982	933	tags=22%, list=12%, signal=20%	H2-Eb1/H2-Ab1/H2-Aa/Aif1/Fcer1g/Plek/Cd74/Tyrobp/Mif/Mmp14/Vamp8/Lilrb4a/H2-DMb1/Ptafr/Trem2/Il4i1/Rps3/Lgals1/Itgb2/Cd40/Rhoa/Cd274/Anxa1/Fgr/Jund/Ptprc/Cd47/Crlf2/Il2rg/Selenok/Axl/H2-DMa/Pycard/Pnp/Bcl10/Gm9733/Il18/B2m/Ptprj/Spn/Actb/Gpr183/Ctsc/Cdkn1a/Itgam/Sirpb1c/Rasgrp1/Clec4d/Stap1/Flna/Tnfsf13/Tfrc/Pdgfb/Gm5150	GO Biological Process
Monocytes	GO:0071800	podosome assembly	13	0.806453	1.79109	0.00175426	0.0455689	0.0392419	567	tags=54%, list=7%, signal=50%	Rhoa/Hck/Lcp1/Arpc2/Msn/Bin2/Asap1	GO Biological Process
Monocytes	GO:1901137	carbohydrate derivative biosynthetic process	327	0.420603	1.40608	0.0017871	0.0457285	0.0393794	1276	tags=26%, list=16%, signal=23%	Nme2/Aldoa/Eno1/Itm2b/Atp5g1/Trem2/Ost4/Sdhb/Ndufa7/Ndufa13/Atp5j/Tpi1/Tmem258/Ndufa11/Mpc2/Dad1/Atp5e/Atp5g2/Atp5j2/Atp5c1/Ndufc2/Ndufb4/Atp5d/Dpm1/Ndufb8/Ndufs4/Tcf7l2/Pnp/Ndufa12/Mpc1/Ndufs5/Atp5l/Ndufb9/Ndufs8/Atp5b/Ndufv3/Ndufv2/Ndufa8/Ramp1/Ak2/Pdk3/Krtcap2/Ndufc1/Gcnt2/Atp5o/Pgap2/Ndufb7/Ndufs7/Ndufb2/Ndufa3/Ndufa1/Ndufa5/Alg5/Tmem59/Pygl/Ndufs3/Ndufab1/Cmpk1/Dpm3/Pkm/Tnip1/Pdgfb/Aprt/Nduf…	GO Biological Process
Monocytes	GO:0003955	NAD(P)H dehydrogenase (quinone) activity	16	0.759444	1.75591	0.00260487	0.0461322	0.0402754	1117	tags=69%, list=14%, signal=59%	Ndufa7/Ndufc2/Ndufb8/Ndufs4/Ndufs8/Ndufv2/Ndufb7/Ndufs7/Ndufs3/Cbr3/Ndufs2	GO Molecular Function
Monocytes	GO:0043588	skin development	101	-0.384527	-1.59543	0.00185803	0.0469548	0.0404354	1372	tags=38%, list=17%, signal=31%	Txnip/Cbx7/Smarca4/Sos1/Ptges3/Lats2/Dicer1/Ltb/Apc/Hdac1/Casp3/Hdac2/Plec/Rock2/Sgpp1/Lats1/Ash1l/Bcr/Runx3/Zdhhc21/Stmn1/Ugcg/Trps1/Bcl11b/Met/Ppp3ca/Rock1/Ldb1/Arrdc3/Srsf6/Ezh2/Numa1/Runx1/Pum2/Scd1/Notch1/Psap/Fosl2	GO Biological Process
Monocytes	mmu05330	Allograft rejection - Mus musculus (house mouse)	22	0.697014	1.71601	0.00489002	0.0471743	0.0383027	410	tags=32%, list=5%, signal=30%	H2-Eb1/H2-Ab1/H2-Aa/H2-DMb1/H2-D1/Cd40/H2-DMa	Kegg Pathway
Monocytes	mmu05416	Viral myocarditis - Mus musculus (house mouse)	40	0.620499	1.67747	0.0048009	0.0471743	0.0383027	1323	tags=45%, list=17%, signal=37%	H2-Eb1/H2-Ab1/H2-Aa/H2-DMb1/H2-D1/Itgb2/Cd40/Icam1/H2-DMa/Cycs/Actb/H2-M3/H2-K1/Itgal/Fyn/Rac1/H2-Eb2/H2-T23	Kegg Pathway
Monocytes	GO:0051148	negative regulation of muscle cell differentiation	37	-0.541634	-1.88546	0.00188135	0.0473606	0.0407849	1035	tags=35%, list=13%, signal=31%	Ptbp1/Bmpr2/Foxo4/Rgs2/Ankrd17/Nfatc3/Dnmt1/Ezh2/Nfatc1/Foxp1/Ccnd2/Notch1/Xbp1	GO Biological Process
Monocytes	GO:0048156	tau protein binding	15	-0.681376	-1.9243	0.00294686	0.049142	0.0429031	1414	tags=53%, list=18%, signal=44%	Picalm/Gsk3b/Fkbp4/Hsp90ab1/Dyrk1a/Mark2/Hsp90aa1/Apoe	GO Molecular Function
Monocytes	mmu04137	Mitophagy - animal - Mus musculus (house mouse)	56	0.562817	1.59538	0.00526099	0.049303	0.040031	1772	tags=41%, list=23%, signal=32%	Ubb/Jun/Uba52/Fis1/Rras/Gabarap/Rps27a/Map1lc3b/Gabarapl2/Ubc/Kras/Bnip3l/Hif1a/Tax1bp1/Map1lc3a/Tomm7/Tbk1/Sqstm1/Atg5/Gabarapl1/Rab7/Csnk2b/Pink1	Kegg Pathway
Monocytes	GO:0042110	T cell activation	331	0.416163	1.38965	0.00199136	0.0499371	0.0430036	939	tags=21%, list=12%, signal=20%	H2-Eb1/H2-Ab1/Bcl2a1d/H2-Aa/Aif1/Fcer1g/Cd74/Lilrb4a/H2-DMb1/Cd300a/Bax/Clec4e/Spi1/Cebpb/Apbb1ip/Il4i1/Hfe/Lgals3/Rps3/Lgals1/Itgb2/Rhoa/Cd274/Prelid1/Anxa1/Psmb10/Clec4a3/Mafb/Slc11a1/Lcp1/Ptprc/Slamf7/Tnfaip8l2/Cd47/Il2rg/Icam1/Selenok/Cd48/Msn/H2-DMa/Pycard/Pnp/Clec4a1/Bcl10/Rsad2/Gm9733/Ceacam1/Ptpn6/Slfn1/Il18/B2m/Relb/Ctsl/Spn/Actb/Sdc4/Gpr183/Clec4b1/Ifnar2/Bcl3/Itgam/Runx2/Clec4a2/Cd44/S…	GO Biological Process

## Sheet: Neutrophils_pathway
ClusterID	ID	Description	setSize	enrichmentScore	NES	pvalue	p.adjust	qvalue	rank	leading_edge	core_enrichment	PathwayDB
Neutrophils	GO:0050853	B cell receptor signaling pathway	44	-0.720427	-2.10857	2.70049e-09	5.4712e-06	4.9888e-06	642	tags=50%, list=10%, signal=45%	Nckap1l/Lck/Foxp1/Blnk/Syk/Cd22/Blk/Mef2c/Iglc3/Plcg2/Ighg2b/Prkcb/Klhl6/Iglc2/Cd19/Cd79b/Ighd/Cd79a/Ms4a1/Ighm/Igha/Igkc	GO Biological Process
Neutrophils	GO:0042113	B cell activation	175	-0.533552	-1.89082	2.5887e-09	5.4712e-06	4.9888e-06	1359	tags=44%, list=21%, signal=36%	Irf8/Nfam1/Pten/Inpp5d/Bak1/Cd27/Tnfrsf13b/Adgrg3/Rbpj/Casp3/Tcirg1/Gapt/Ptprj/Pik3r1/Tnfrsf21/Hdac7/Cd38/Cd74/Spib/Sash3/Syvn1/Rc3h1/Nsd2/Dock11/Zbtb7a/Ptpn6/Nfatc1/Xbp1/Swap70/Tirap/Fcgr2b/Mzb1/Hhex/Nckap1l/Laptm5/Pou2af1/Foxp1/Id2/Ikzf3/Blnk/Sh3kbp1/Hspd1/Syk/Pkn1/Cd22/Gimap1/Blk/Tnfrsf13c/Malt1/Mef2c/Dock10/Iglc3/Plcg2/Tnfsf13b/Tbc1d10c/Bcl11a/Ighg2b/Pou2f2/Siglecg/Prkcb/Iglc2/Prkcd/Cr2/Cd24a…	GO Biological Process
Neutrophils	GO:0000902	cell morphogenesis	374	-0.456501	-1.73866	1.46055e-09	5.4712e-06	4.9888e-06	1357	tags=43%, list=21%, signal=36%	Caprin1/Fmnl2/Bcl2/Crk/Brwd3/Stradb/Ythdf1/Pdlim5/Tbc1d24/Rdx/Golga2/Nbeal2/Ilk/Mkln1/Dvl1/Sod1/Unc13d/Cdc42se1/Strip1/Cyfip1/Pten/Rere/Mycbp2/Rilpl2/Vegfa/Usp9x/Dicer1/Plec/Lats1/Rac2/Usp33/B4galt6/Adnp/Flot1/Ttc3/Dock5/Mef2a/Sidt2/Myo9b/Limd1/Rap2a/Ptpn11/Lats2/Arap1/Fermt3/Diaph1/Rhog/Pak2/Unc93b1/Arhgef2/Smarca4/Anxa1/Brwd1/Ctnnb1/Cdc42/Rhoh/Taok3/Creb1/Nedd4/Gna13/Csnk1a1/Snx2/Cdc42ep3/Ss18l…	GO Biological Process
Neutrophils	mmu05144	Malaria - Mus musculus (house mouse)	19	0.911267	2.60485	1.87906e-08	5.86266e-06	4.64819e-06	8	tags=26%, list=0%, signal=26%	Hbb-bs/Hba-a2/Hba-a1/Hbb-bt/Il1b	Kegg Pathway
Neutrophils	GO:0002455	humoral immune response mediated by circulating immunoglobulin	24	-0.820925	-2.16129	1.0664e-08	1.6204e-05	1.47753e-05	791	tags=58%, list=12%, signal=51%	Ptpn6/Fcgr2b/C1rl/Cd55/C3/Iglc3/Ighg2b/Gimap3/Iglc2/Cr2/Ighd/Ighm/Igha/Igkc	GO Biological Process
Neutrophils	GO:0030029	actin filament-based process	315	-0.456096	-1.71501	1.00481e-07	0.000112741	0.000102801	1728	tags=44%, list=27%, signal=34%	Gas2l3/Setd3/Acap2/Cd2ap/Tln1/Stap1/Ptk2b/Abracl/Lcp1/Fmnl2/Bcl2/Crk/Zyx/Pdlim5/Rdx/Arf1/Ptger4/Ilk/Cd47/Mkln1/Plekhg2/Hip1r/Gmfg/Strip1/Racgap1/Anln/Cyfip1/Rasa1/Tmod3/Clec2i/Plec/Tpm3/Camk2d/Lats1/Capg/Rac2/Tmsb10/Pik3r1/Was/S1pr1/Wipf2/Gsn/Sirpa/Rala/Mef2a/Myo9b/Gpd1l/Rap2a/Atp2c1/Arap1/Diaph1/Rhog/Pak2/Hcls1/Prkar1a/Arhgef2/Anxa1/Fnbp1l/Mtss1/Cdc42/Rhoh/Ikbkb/Mrtfa/Myl6/Cdc42ep3/Grb2/Nedd9/Sd…	GO Biological Process
Neutrophils	GO:0000904	cell morphogenesis involved in differentiation	251	-0.469219	-1.72931	2.43307e-07	0.00021126	0.000192634	2040	tags=52%, list=32%, signal=37%	Tiam1/Itgb3/Rb1/Scrib/Zfyve27/Ap1ar/Sema4a/Taok2/Vamp3/Kidins220/Srgap2/Top2b/Cit/Coro1c/Fyn/Psen1/Runx3/Tbc1d20/Cnp/Vim/Map1s/Crkl/Sema4b/Caprin1/Bcl2/Crk/Ythdf1/Pdlim5/Tbc1d24/Golga2/Nbeal2/Ilk/Dvl1/Sod1/Unc13d/Cyfip1/Pten/Rere/Mycbp2/Rilpl2/Vegfa/Usp9x/Lats1/Rac2/Usp33/B4galt6/Adnp/Flot1/Ttc3/Dock5/Mef2a/Rap2a/Ptpn11/Lats2/Fermt3/Rhog/Pak2/Ctnnb1/Cdc42/Rhoh/Creb1/Nedd4/Ss18l2/Adam10/Stk11/Pqbp…	GO Biological Process
Neutrophils	GO:0030036	actin cytoskeleton organization	294	-0.452894	-1.69219	3.91533e-07	0.000264415	0.000241102	1609	tags=41%, list=25%, signal=33%	Lcp1/Fmnl2/Bcl2/Crk/Zyx/Pdlim5/Rdx/Arf1/Ptger4/Ilk/Cd47/Mkln1/Plekhg2/Hip1r/Gmfg/Strip1/Racgap1/Anln/Cyfip1/Rasa1/Tmod3/Clec2i/Plec/Tpm3/Lats1/Capg/Rac2/Tmsb10/Pik3r1/Was/S1pr1/Gsn/Sirpa/Rala/Mef2a/Rap2a/Atp2c1/Arap1/Diaph1/Rhog/Pak2/Hcls1/Prkar1a/Arhgef2/Anxa1/Mtss1/Cdc42/Rhoh/Ikbkb/Mrtfa/Cdc42ep3/Grb2/Nedd9/Sdcbp/Lima1/Swap70/Evl/Gmfb/Coro7/Nckap1l/Dbnl/Elmo1/Fchsd2/Tesk2/Dock2/Hck/Iqgap1/Triob…	GO Biological Process
Neutrophils	mmu05203	Viral carcinogenesis - Mus musculus (house mouse)	119	-0.53104	-1.79314	1.92371e-06	0.000300099	0.000237933	1256	tags=44%, list=20%, signal=36%	Bak1/Psmc1/Rbpj/Casp3/Nras/Pik3r1/Ubr4/Irf9/Atp6v0d1/Ccna2/H2-T22/Gsn/Prkacb/Hdac7/Mdm2/Ccnd2/Cdc42/Ywhab/Creb1/Crebbp/Rbl1/Traf3/Grb2/Rela/H2-Q4/Hdac1/Chd4/Ube3a/Pik3cb/Usp7/Syk/Ywhah/C3/Stat3/Atf4/Actn4/Pxn/Cdk2/Rasa2/Hnrnpk/Ywhae/Ccnd3/Sp100/Mapk3/Ywhaz/Ep300/Ddx3x/Actn1/Nfkb1/H2-Q6/H2-K1/H2-Q7	Kegg Pathway
Neutrophils	GO:0030183	B cell differentiation	99	-0.563588	-1.86036	4.99911e-07	0.000303846	0.000277056	1359	tags=45%, list=21%, signal=36%	Irf8/Nfam1/Inpp5d/Bak1/Cd27/Adgrg3/Rbpj/Tcirg1/Ptprj/Pik3r1/Hdac7/Spib/Syvn1/Dock11/Zbtb7a/Ptpn6/Nfatc1/Xbp1/Hhex/Nckap1l/Laptm5/Pou2af1/Foxp1/Id2/Ikzf3/Syk/Gimap1/Malt1/Dock10/Plcg2/Tnfsf13b/Bcl11a/Pou2f2/Cr2/Cd24a/Sp3/Cd19/Ep300/Cd79b/Ikzf1/Cd79a/Irf2bp2/Ms4a1/Ighm/Igkc	GO Biological Process
Neutrophils	mmu04670	Leukocyte transendothelial migration - Mus musculus (house mouse)	57	-0.61893	-1.89986	3.11324e-06	0.000323777	0.000256706	1175	tags=58%, list=19%, signal=48%	Rac2/Pik3r1/Cldn1/Ptpn11/Gnai2/Itgb2/Cldn15/Ctnnb1/Ncf2/Cdc42/Rhoh/Myl12a/Cxcr4/Pik3cb/Mapk14/Gnai3/Mmp9/Rock2/Plcg2/Actn4/Pxn/Prkcb/Actb/Itgb2l/Sipa1/Vcl/Rock1/Itgam/Actn1/Cybb/Vasp/Ncf1/Actg1	Kegg Pathway
Neutrophils	GO:0006897	endocytosis	278	-0.455518	-1.69619	6.48176e-07	0.000358147	0.000326569	1514	tags=38%, list=23%, signal=31%	Appl1/Tbc1d24/Arf1/Cd47/Mkln1/Rab31/Fcho2/Hip1r/Csnk1g2/Synj1/Ldlr/Rab5c/Fkbp15/Csnk1g3/Snx5/Pten/Ap2b1/Mib1/Arhgap27/Vegfa/Snx10/Ldlrap1/Rin2/Ap2s1/Rac2/Usp33/Tsg101/Flot1/Rab5b/Dennd1c/Pikfyve/Hgs/Gsn/Sirpa/Btbd9/Rhog/Itgb2/Calcrl/Fnbp1l/Cdc42/Rhoh/Nedd4/Snx2/Aak1/Grb2/Sdcbp/Ap1g1/Ppp3cb/Abca13/Esyt2/Itsn2/Abca7/Fcgr2b/Nckap1l/Apoe/Dbnl/Ube3a/Elmo1/Epn1/Fchsd2/Usp46/Pik3cb/Dock2/Ehd1/Rinl/Cap1/…	GO Biological Process
Neutrophils	mmu05143	African trypanosomiasis - Mus musculus (house mouse)	12	0.922356	2.4025	4.60266e-06	0.000359007	0.000284638	8	tags=42%, list=0%, signal=42%	Hbb-bs/Hba-a2/Hba-a1/Hbb-bt/Il1b	Kegg Pathway
Neutrophils	GO:0110053	regulation of actin filament organization	124	-0.532527	-1.80948	7.73422e-07	0.000361605	0.000329722	1502	tags=47%, list=23%, signal=37%	Rdx/Arf1/Ptger4/Cd47/Plekhg2/Hip1r/Gmfg/Cyfip1/Rasa1/Tmod3/Clec2i/Lats1/Capg/Tmsb10/Pik3r1/Was/S1pr1/Gsn/Arap1/Pak2/Hcls1/Mtss1/Cdc42/Cdc42ep3/Grb2/Lima1/Swap70/Evl/Gmfb/Nckap1l/Dbnl/Fchsd2/Sptbn1/Add1/Arpc4/Mtpn/Coro1a/Add3/Rock2/Cfl1/Pxn/Capza1/Mlst8/Arpc5/Nck1/Prkcd/Capzb/Cotl1/Dstn/Capn1/Arfgef1/Flna/Twf2/Vasp/Actr3/Wdr1/Cyfip2/Actg1	GO Biological Process
Neutrophils	GO:0007163	establishment or maintenance of cell polarity	102	-0.551931	-1.83014	1.59512e-06	0.000605947	0.000552521	1681	tags=49%, list=26%, signal=37%	Htt/Ptk2b/Crkl/Plekhg3/Crk/Synj2bp/Cyth1/Ilk/Golph3/Rap1b/Dctn1/Rac2/Tcirg1/Gsn/Myo9b/Fbxw11/Numa1/Rhog/Arhgef2/Cdc42/Rhoh/Stk11/Map4/Rab10/Gsk3b/Coro7/Nckap1l/Dock2/Krit1/Slc9a3r1/Macf1/Pafah1b1/Igf1r/Parvg/Mark2/Cfl1/Dock8/Hsp90ab1/Actb/Myh9/Arpc5/Pdcd6ip/Hsp90aa1/Actr2/Arfgef1/Flot2/Rhou/Actr3/Wdr1/Lims1	GO Biological Process
Neutrophils	GO:0034987	immunoglobulin receptor binding	17	-0.825907	-2.03113	8.98018e-07	0.000944715	0.000846973	323	tags=53%, list=5%, signal=50%	Iglc3/Ighg2b/Iglc2/Flna/Ighd/Jchain/Ighm/Igha/Igkc	GO Molecular Function
Neutrophils	GO:0003823	antigen binding	41	-0.664966	-1.93241	2.85864e-06	0.00100243	0.000898715	701	tags=41%, list=11%, signal=37%	H2-Q4/Tap2/Lck/Psap/Hnrnpm/Tap1/Iglc3/Ighg2b/Iglc2/Ighd/H2-Q6/H2-K1/H2-Q7/Jchain/Ighm/Igha/Igkc	GO Molecular Function
Neutrophils	GO:0051015	actin filament binding	91	-0.563908	-1.87392	2.65305e-06	0.00100243	0.000898715	1235	tags=46%, list=19%, signal=38%	Plec/Tpm3/Capg/Adssl1/Gsn/Myo9b/Hcls1/Mtss1/Lima1/Fgd4/Coro7/Dbnl/Iqgap1/Triobp/Macf1/Sptbn1/Myo1f/Add1/Myo5a/Arpc4/Coro1a/Rcsd1/Add3/Eef2/Cfl1/Actn4/Capza1/Myh9/Syne1/Ablim1/Arpc5/Syne2/Cotl1/Dstn/Actr2/Vcl/Flna/Lasp1/Twf2/Actn1/Actr3/Wdr1	GO Molecular Function
Neutrophils	GO:0019900	kinase binding	445	-0.401646	-1.54321	4.98884e-06	0.00131206	0.00117632	1951	tags=42%, list=30%, signal=31%	Taok2/Kidins220/Spred2/Prkaa1/Mical1/Nr3c1/Mob1b/Top2b/Cit/Pde8a/Traf2/Tcf3/Ski/Cnppd1/Nsf/Utrn/Rasgrp3/Kat2b/Dlg1/Irak3/Vim/Copb2/Per2/Stap1/Naip5/Mapk1/Htt/Ptk2b/Crkl/Map3k7/Hnrnpa0/Pitpnm1/Tollip/Crk/Mapkapk3/Lat/Pdlim5/Prc1/Pdpk1/Chil5/Appl1/Golga2/Nbeal2/Irak4/Ilk/Maml1/Rad9a/Dvl1/Rps6/Dnajc3/Ubqln1/Gcn1/Pgam1/Strip1/Racgap1/Rasa1/Pten/Exoc2/Bcar3/Kif11/Srsf2/Ppp2ca/Dctn1/Lats1/Rac2/Pih1d1/N…	GO Molecular Function
Neutrophils	GO:0032970	regulation of actin filament-based process	174	-0.478757	-1.69511	4.5741e-06	0.00132388	0.00120715	1502	tags=41%, list=23%, signal=32%	Rdx/Arf1/Ptger4/Ilk/Cd47/Plekhg2/Hip1r/Gmfg/Cyfip1/Rasa1/Tmod3/Clec2i/Lats1/Capg/Rac2/Tmsb10/Pik3r1/Was/S1pr1/Gsn/Arap1/Rhog/Pak2/Hcls1/Mtss1/Cdc42/Rhoh/Cdc42ep3/Grb2/Lima1/Swap70/Evl/Gmfb/Nckap1l/Dbnl/Fchsd2/Hck/Iqgap1/Sptbn1/Myo1f/Add1/Arpc4/Mtpn/Coro1a/Add3/Rock2/Arhgdia/Mef2c/Cfl1/Pxn/Capza1/Mlst8/Myh9/Arpc5/Nck1/Prkcd/Arhgdib/Capzb/Cotl1/Dstn/Capn1/Arfgef1/Rock1/Flna/Twf2/Vasp/Actr3/Cnn2/Wdr…	GO Biological Process
Neutrophils	GO:0097435	supramolecular fiber organization	291	-0.434909	-1.62481	6.44998e-06	0.00156812	0.00142986	1758	tags=41%, list=27%, signal=31%	Kif18b/Dlg1/Mid1ip1/Gas2l3/Vim/Cd2ap/Map1s/Ptk2b/Katna1/Lcp1/Bcl2/Zyx/Gda/Rdx/Arf1/Ptger4/Ilk/Cd47/Plekhg2/Hip1r/Dvl1/Gmfg/Ldlr/Bid/Cyfip1/Rasa1/Tmod3/Clec2i/Slain2/Vbp1/Plec/Tpm3/Dctn1/Lats1/Capg/Rac2/Tmsb10/Pik3r1/Was/S1pr1/Gsn/Sirpa/Mef2a/Kpnb1/Mdm2/Arap1/Numa1/Diaph1/Rhog/Pak2/Hcls1/Prkar1a/Arhgef2/Mtss1/Cdc42/Rhoh/Hook3/Cdc42ep3/Grb2/Nedd9/Lima1/Swap70/Dync1h1/Evl/Mia3/Gmfb/Coro7/Nckap1l/Apo…	GO Biological Process
Neutrophils	GO:0002707	negative regulation of lymphocyte mediated immunity	21	-0.765583	-1.95599	8.0248e-06	0.00187595	0.00171055	796	tags=62%, list=12%, signal=54%	Lgals9/Ptpn6/Ppp3cb/Fcgr2b/Nckap1l/Tap2/Cd55/Tap1/Clec2d/Cr2/Arrb2/Vsir/Ceacam1	GO Biological Process
Neutrophils	GO:0050864	regulation of B cell activation	93	-0.544638	-1.78683	8.84751e-06	0.00192054	0.00175121	1330	tags=44%, list=21%, signal=36%	Nfam1/Pten/Inpp5d/Cd27/Tnfrsf13b/Casp3/Tnfrsf21/Cd38/Cd74/Sash3/Rc3h1/Nsd2/Ptpn6/Xbp1/Tirap/Fcgr2b/Mzb1/Nckap1l/Laptm5/Id2/Ikzf3/Sh3kbp1/Syk/Pkn1/Cd22/Blk/Tnfrsf13c/Mef2c/Iglc3/Tnfsf13b/Tbc1d10c/Ighg2b/Siglecg/Iglc2/Cd24a/Bank1/Cd19/Ighd/Ighm/Igha/Igkc	GO Biological Process
Neutrophils	GO:0018105	peptidyl-serine phosphorylation	156	-0.489184	-1.70838	8.73253e-06	0.00192054	0.00175121	1334	tags=39%, list=21%, signal=32%	Pwp1/Csnk1g3/Hk1/Pten/Vegfa/Bak1/Bcar3/Camk2d/Lats1/Pikfyve/Nek7/Csnk2a1/Gsk3a/Ikbke/Gpd1l/Srpk2/Lats2/Top1/Pak2/Hipk3/Hcls1/Csnk1a1/Ikbkb/Ggnbp2/Mast3/Uhmk1/Stk4/Mknk2/Gsk3b/Ogt/Rack1/Nsd1/Mapk14/Cab39/Prkd2/Lmtk2/Syk/Pkn1/Hipk2/Rps6ka3/Smg1/Mark2/Rock2/Rps6kb1/Grk2/Rps6ka1/Cdk2/Prkcb/Lrrk2/Hsp90ab1/Nck1/Phip/Prkcd/Hsp90aa1/Stk39/Mapk3/Wnk1/Arrb2/Rock1/Rassf2/Hipk1	GO Biological Process
Neutrophils	GO:0019001	guanyl nucleotide binding	156	-0.487621	-1.73473	1.17586e-05	0.00206168	0.00184837	1571	tags=38%, list=24%, signal=30%	Rab8b/Glud1/Gimap9/Adss/Arf1/Ciita/Rab31/Eif2s3x/Rab14/Rasl11b/Rab5c/Rap1b/Pip4k2b/Tubb4b/Eif5b/Gnaq/Rab1b/Gtpbp1/Adssl1/Rac2/Nras/Tubb5/Rab5b/Rab43/Rala/Rap2a/Gnai2/Rhog/Cdc42/Rhoh/Gna13/Agap1/Gimap8/Arl8a/Rab10/Tuba1c/Gnas/Ralb/Rab7/Eef1a1/Gimap6/Ehd1/Gnai3/Gimap1/Nin/Eef2/Rab27a/Rab44/Rap2c/Rp2/Lrrk2/Hsp90ab1/Pde2a/Rab6a/Gimap3/Rab3d/Gimap4/Tuba4a/Rhou/Tuba1b	GO Molecular Function
Neutrophils	GO:0032561	guanyl ribonucleotide binding	156	-0.487621	-1.73473	1.17586e-05	0.00206168	0.00184837	1571	tags=38%, list=24%, signal=30%	Rab8b/Glud1/Gimap9/Adss/Arf1/Ciita/Rab31/Eif2s3x/Rab14/Rasl11b/Rab5c/Rap1b/Pip4k2b/Tubb4b/Eif5b/Gnaq/Rab1b/Gtpbp1/Adssl1/Rac2/Nras/Tubb5/Rab5b/Rab43/Rala/Rap2a/Gnai2/Rhog/Cdc42/Rhoh/Gna13/Agap1/Gimap8/Arl8a/Rab10/Tuba1c/Gnas/Ralb/Rab7/Eef1a1/Gimap6/Ehd1/Gnai3/Gimap1/Nin/Eef2/Rab27a/Rab44/Rap2c/Rp2/Lrrk2/Hsp90ab1/Pde2a/Rab6a/Gimap3/Rab3d/Gimap4/Tuba4a/Rhou/Tuba1b	GO Molecular Function
Neutrophils	GO:0017111	ribonucleoside triphosphate phosphatase activity	263	-0.429645	-1.59136	1.66997e-05	0.0024107	0.00216129	1452	tags=37%, list=22%, signal=30%	Rab35/Smarca2/Nsf/Cct5/Gtpbp4/Arl8b/Kif18b/Nkiras2/Cct7/Katna1/Tor1b/Rab8b/Gimap9/Vps4b/Atad2b/Abcd1/Rab31/Eif2s3x/Kif3b/Rab14/Rasl11b/Rab5c/Dhx9/Rap1b/Abcd3/Tubb4b/Atp13a3/Eif5b/Gnaq/Rab1b/Psmc1/Gtpbp1/Adssl1/Rac2/Nras/Tcp1/Tubb5/Rab5b/Pikfyve/Rab43/Rala/Atf7ip/Myo9b/Rap2a/Gnai2/Abcc5/Rhog/Smarca4/Cdc42/Rhoh/Gna13/Hsph1/Kif21b/Agap1/Arl8a/Rab10/Tuba1c/Gnas/Abca13/Ralb/Abca7/Rab7/Chd4/Eef1a1/Chd3…	GO Molecular Function
Neutrophils	GO:0044087	regulation of cellular component biogenesis	427	-0.396063	-1.52233	1.3778e-05	0.00270137	0.00246319	1344	tags=33%, list=21%, signal=28%	Anln/Bid/Cyfip1/Rap1b/Rasa1/Pten/Pip4k2b/Mycbp2/Tmod3/Vegfa/Clec2i/Bak1/Slain2/Dctn1/Lats1/Capg/Rac2/Fxr2/Pih1d1/Npm1/Tsg101/Adnp/Hnrnpu/Ptprj/Flot1/Tmsb10/Vps35/Pikfyve/Pik3r1/Hgs/Nek7/Was/S1pr1/Entr1/Lamp2/Ppm1a/Gsn/G3bp2/Hcfc1/Rala/Atf7ip/Ikbke/Cldn1/Ormdl1/Ptpn11/Arap1/Numa1/Rhog/Pak2/Hcls1/Arhgef2/Phf23/Fnbp1l/Mtss1/Cdc42/Akirin1/Creb1/Gdi2/Dock11/Ikbkb/Cdc42ep3/Pqbp1/Grb2/Sdcbp/Map4/Setd5/W…	GO Biological Process
Neutrophils	GO:0007264	small GTPase mediated signal transduction	200	-0.461011	-1.6577	1.51479e-05	0.00278997	0.00254398	1357	tags=37%, list=21%, signal=30%	Cdc42se1/Racgap1/Cyfip1/Rap1b/Lpar6/Bcar3/Camk2d/Rac2/Nras/Ralgapa1/Flot1/Arfgef2/Uso1/Was/Dock5/G3bp2/Rala/Kpnb1/Myo9b/Dgkz/Rasgrp2/Rap2a/Dennd4b/Psd4/Rhog/Arhgef2/Rsu1/Cdc42/Rhoh/Gdi2/Dock11/Gna13/Cdc42ep3/Grb2/Sdcbp/Ralb/Apoe/Git2/Ogt/Dbnl/Itpkb/Elmo1/Pik3cb/Dock2/Kctd10/Dok2/Rasal3/Map4k4/Arhgap19/Kbtbd7/Bnip2/Rock2/Arhgdia/Dock10/Gdi1/Rgl2/Dock8/Rap2c/Ccdc88c/Rasa2/Cul3/Dok3/Nisch/Notch1/Cbl…	GO Biological Process
Neutrophils	GO:0005525	GTP binding	152	-0.487939	-1.73192	2.61375e-05	0.00300539	0.00269444	1571	tags=39%, list=24%, signal=30%	Rab8b/Glud1/Gimap9/Adss/Arf1/Ciita/Rab31/Eif2s3x/Rab14/Rasl11b/Rab5c/Rap1b/Pip4k2b/Tubb4b/Eif5b/Gnaq/Rab1b/Gtpbp1/Adssl1/Rac2/Nras/Tubb5/Rab5b/Rab43/Rala/Rap2a/Gnai2/Rhog/Cdc42/Rhoh/Gna13/Agap1/Gimap8/Arl8a/Rab10/Tuba1c/Gnas/Ralb/Rab7/Eef1a1/Gimap6/Ehd1/Gnai3/Gimap1/Nin/Eef2/Rab27a/Rab44/Rap2c/Rp2/Lrrk2/Hsp90ab1/Rab6a/Gimap3/Rab3d/Gimap4/Tuba4a/Rhou/Tuba1b	GO Molecular Function
Neutrophils	GO:0019904	protein domain specific binding	408	-0.394393	-1.50251	3.68845e-05	0.00323354	0.00289899	1502	tags=36%, list=23%, signal=29%	Rdx/Tra2b/Arf1/Litaf/Ptpn12/Ilk/Hivep1/Ppp1r2/Rad9a/Hip1r/Zfp592/Ubqln1/Jdp2/Lrrfip2/Synj1/Mospd3/Lamp1/Strn3/Pten/Arhgap27/Bak1/Csnk2b/Cd3e/Dicer1/Ppp2ca/Capg/Tubb5/Usp47/Pag1/Pik3r1/Hgs/Ccna2/Was/Lamp2/Sp1/Sirpa/Cdc5l/Xpo1/Kpnb1/Ipcef1/Ptpn11/Pirb/Mdm2/Trim11/Numa1/Top1/Hcls1/Prkar1a/Ctnnb1/Cdc42/Ywhab/Nedd4/Crebbp/Mrtfa/Adam10/Plaur/Stk11/Grb2/Ptpn6/Lbr/Sh3bgrl/Ctbp1/Rela/Cnot1/Gnas/Ldb1/Hdac1…	GO Molecular Function
Neutrophils	GO:0099024	plasma membrane invagination	49	-0.615596	-1.83542	2.04153e-05	0.00344678	0.00314288	1093	tags=47%, list=17%, signal=39%	Gsn/Sirpa/Rhog/Itgb2/Cdc42/Rhoh/Abca7/Fcgr2b/Nckap1l/Elmo1/C3/Iglc3/Plcg2/Snx18/Ighg2b/Lbp/Myh9/Iglc2/Itgam/Ighd/Ighm/Igha/Igkc	GO Biological Process
Neutrophils	GO:0004601	peroxidase activity	18	0.829123	2.31713	4.64607e-05	0.00375639	0.00336775	307	tags=28%, list=5%, signal=27%	Hba-a1/Hbb-bt/Gpx4/Alox5ap/Park7	GO Molecular Function
Neutrophils	GO:0019825	oxygen binding	7	0.935063	2.13287	4.999e-05	0.00375639	0.00336775	4	tags=29%, list=0%, signal=29%	Hba-a1/Hbb-bt	GO Molecular Function
Neutrophils	GO:0048511	rhythmic process	110	-0.50158	-1.67803	2.82202e-05	0.00451375	0.00411577	1377	tags=39%, list=21%, signal=31%	Huwe1/Dhx9/Pten/Mycbp2/Usp9x/Kdm5a/Hnrnpu/Nfya/Sp1/Csnk2a1/Setx/Fbxw11/Btbd9/Top1/Anxa1/Creb1/Crebbp/Runx1/Nono/Hdac1/Gsk3b/Ogt/Rack1/Ube3a/Kdm2a/Bhlhe40/Usp7/Id2/Igf1r/Zfhx3/Top2a/Kmt2a/Rock2/Ppp1ca/Grk2/Atf4/Mat2a/Sfpq/Arrb2/Tardbp/Ep300/Ppp1cb/Inhba	GO Biological Process
Neutrophils	mmu05205	Proteoglycans in cancer - Mus musculus (house mouse)	92	-0.518577	-1.705	8.15745e-05	0.00509025	0.00403579	1263	tags=40%, list=20%, signal=33%	Vegfa/Nudt16l1/Camk2d/Casp3/Nras/Pik3r1/Prkacb/Ptpn11/Mdm2/Hcls1/Ctnnb1/Cdc42/Plaur/Grb2/Ptpn6/Pik3cb/Iqgap1/Mapk14/Eif4b/Igf1r/Arhgef1/Mmp9/Rock2/Ppp1ca/Rps6kb1/Stat3/Plcg2/Pxn/Prkcb/Actb/Cbl/Ppp1r12a/Mapk3/Rock1/Flna/Ppp1cb/Actg1	Kegg Pathway
Neutrophils	GO:0006911	phagocytosis, engulfment	43	-0.627669	-1.831	3.34525e-05	0.00521345	0.00475378	1093	tags=51%, list=17%, signal=43%	Gsn/Sirpa/Rhog/Itgb2/Cdc42/Rhoh/Abca7/Fcgr2b/Nckap1l/Elmo1/C3/Iglc3/Plcg2/Ighg2b/Lbp/Myh9/Iglc2/Itgam/Ighd/Ighm/Igha/Igkc	GO Biological Process
Neutrophils	GO:1902903	regulation of supramolecular fiber organization	176	-0.458011	-1.62495	3.91305e-05	0.00589912	0.005379	1523	tags=39%, list=24%, signal=30%	Gda/Rdx/Arf1/Ptger4/Cd47/Plekhg2/Hip1r/Gmfg/Ldlr/Cyfip1/Rasa1/Tmod3/Clec2i/Slain2/Vbp1/Dctn1/Lats1/Capg/Tmsb10/Pik3r1/Was/S1pr1/Gsn/Arap1/Numa1/Pak2/Hcls1/Arhgef2/Mtss1/Cdc42/Cdc42ep3/Grb2/Lima1/Swap70/Evl/Gmfb/Nckap1l/Apoe/Dbnl/Fchsd2/Sptbn1/Add1/Arpc4/Mtpn/Coro1a/Add3/Rock2/Mef2c/Cfl1/Pxn/Capza1/Mlst8/Arpc5/Nck1/Prkcd/Capzb/Cotl1/Dstn/Capn1/Arfgef1/Flna/Twf2/Hspa8/Vasp/Actr3/Wdr1/Cyfip2/Actg1	GO Biological Process
Neutrophils	GO:0022603	regulation of anatomical structure morphogenesis	353	-0.40862	-1.55282	3.97934e-05	0.00589912	0.005379	1614	tags=41%, list=25%, signal=33%	Sema4b/Aggf1/Caprin1/Fmnl2/Crk/Brwd3/Synj2bp/Anxa3/Pdlim5/Tbc1d24/Rdx/Golga2/Ptger4/Ilk/Mkln1/Dvl1/Unc13d/Ctsh/Huwe1/Cdc42se1/Strip1/Cyfip1/Pten/Vegfa/Dicer1/Rbpj/Ppp1r16b/Stat1/Stim1/Rac2/Nras/Adnp/Vps35/Hgs/Ttc3/Sp1/Dock5/Rala/Limd1/Rap2a/Camp/Alox5/Sh2b3/Arap1/Diaph1/Rhog/Pak2/Hk2/Itgb2/Anxa1/Brwd1/Rc3h1/Ctnnb1/Cdc42/Rhoh/Nedd4/Gna13/Cdc42ep3/Ss18l2/Adam10/Stk11/Pqbp1/Runx1/Nedd9/Myl12a/Xbp1/L…	GO Biological Process
Neutrophils	GO:0002684	positive regulation of immune system process	455	-0.387976	-1.49689	4.1285e-05	0.00597453	0.00544776	943	tags=28%, list=15%, signal=25%	Cbfb/Itgb2/H2-Ob/Hcls1/Smarca4/Slamf6/Anxa1/Rc3h1/Lsm14a/Nsd2/Rhoh/Akirin1/Creb1/Hsph1/Adam10/Stk11/Pqbp1/Arid2/H2-DMb2/Lcp2/Lgals9/Il16/Ptpn6/Runx1/Nono/Stxbp2/Rela/Ap1g1/Xbp1/Gnas/Swap70/Elf1/Rbck1/H2-Q4/Tirap/Mia3/Gsk3b/C1rl/Mzb1/Nckap1l/Rc3h2/Csk/Itpkb/Khdrbs1/Tap2/Laptm5/Lck/Smarcc2/Usp46/Pik3cb/Foxp1/Id2/Smarcd2/Gpi1/Blnk/Sh3kbp1/Myo1f/Prkd2/Rasal3/Matr3/Hspd1/Syk/Cd22/Ifi203/Coro1a/Cd55/Mm…	GO Biological Process
Neutrophils	GO:0002460	adaptive immune response based on somatic recombination of immune receptors built from immunoglobulin superfamily domains	168	-0.462335	-1.63095	4.56481e-05	0.00617371	0.00562937	1027	tags=32%, list=16%, signal=27%	Il18rap/Cd74/Pirb/Sash3/H2-Ob/Unc93b1/Slamf6/Anxa1/Rc3h1/Nsd2/H2-DMb2/Ptpn6/Ppp3cb/Swap70/H2-Q4/Fcgr2b/C1rl/Nckap1l/Rc3h2/Tap2/Hspd1/Pkn1/Cd55/C3/Tnfrsf13c/Malt1/Mef2c/Rab27a/Stx11/Iglc3/Stat3/Tnfsf13b/Ighg2b/Pou2f2/Klhl6/Hlx/Gimap3/Iglc2/Notch1/Prkcd/Cr2/Cd24a/Vsir/Cd19/Ighd/Hspa8/H2-Q6/B2m/H2-K1/H2-Q7/Ighm/Igha/Igkc	GO Biological Process
Neutrophils	GO:0009887	animal organ morphogenesis	274	-0.427361	-1.59111	4.57086e-05	0.00617371	0.00562937	1824	tags=41%, list=28%, signal=31%	Ski/Gak/Vhl/Wls/Psen1/Foxn3/Tbc1d20/Dlg1/Cited2/Casz1/Mapk1/Htt/Crkl/Gfi1/Nfic/Bcl2/Rpl38/Zeb1/Nab1/Ilk/Dvl1/Sod1/Ctsh/Setd2/Pten/Mib1/Zfp950/Vegfa/Bak1/Snx10/Bcar3/Dicer1/Rbpj/Hmgn1/Ly6e/Stim1/Tcirg1/Agtpbp1/Arid5b/Sav1/S1pr1/Sp1/Kat6a/Gsk3a/Mdm2/Fbxw11/Prkar1a/Smarca4/Ctnnb1/Nsd2/Cdc42/Nedd4/Arid2/Nfatc1/Rela/Xbp1/Gnas/Serp1/Hdac1/Nipbl/Gsk3b/Cxcr4/Hhex/Kdm2a/Mef2d/Pbx2/Mapk14/Man2a1/Id2/Triobp…	GO Biological Process
Neutrophils	GO:0035591	signaling adaptor activity	38	-0.625101	-1.80275	0.000138421	0.00621164	0.00556897	1695	tags=63%, list=26%, signal=47%	Stap1/Crkl/Crk/Lat/Ldlrap1/Sav1/Ptpn11/Sh2b3/Sh2b1/Grb2/Rack1/Khdrbs1/Iqgap1/Dok2/Blnk/Abi1/Gnb1/Stat3/Pxn/Lrrk2/Nck1/Gnb2/Rgs14/Bank1	GO Molecular Function
Neutrophils	GO:0004697	protein kinase C activity	7	-0.883078	-1.79875	0.000134213	0.00621164	0.00556897	676	tags=86%, list=10%, signal=77%	Prkd3/Prkd2/Pkn1/Smg1/Prkcb/Prkcd	GO Molecular Function
Neutrophils	GO:0030695	GTPase regulator activity	211	-0.436573	-1.59408	0.000112546	0.00621164	0.00556897	1903	tags=44%, list=29%, signal=32%	Srgap2/Madd/Tbc1d2b/Rap1gds1/Arl2bp/Rasgrp3/Tbc1d20/Rabgap1l/Acap2/Tagap/Ralbp1/Adap1/Arap2/Rangap1/Dennd1b/Plekhg3/Vav1/Tbc1d24/Arhgap45/Cyth1/Plekhg2/Racgap1/Rasa1/Mycbp2/Arhgap27/Bcar3/Gnaq/Rin2/Dennd2d/Ralgapa1/Tbc1d1/Tbc1d2/Dennd1c/Arfgef2/Dennd5b/Dock5/Sirpa/Myo9b/Fgd3/Rasgrp2/Fgd2/Dennd4b/Rgs18/Psd4/Arap1/Dennd5a/Arhgef2/Depdc1b/Gdi2/Dock11/Lamtor4/Agap1/Arhgef6/Itsn2/Tbc1d10b/Rgp1/Fgd4/Nc…	GO Molecular Function
Neutrophils	GO:0060589	nucleoside-triphosphatase regulator activity	211	-0.436573	-1.59408	0.000112546	0.00621164	0.00556897	1903	tags=44%, list=29%, signal=32%	Srgap2/Madd/Tbc1d2b/Rap1gds1/Arl2bp/Rasgrp3/Tbc1d20/Rabgap1l/Acap2/Tagap/Ralbp1/Adap1/Arap2/Rangap1/Dennd1b/Plekhg3/Vav1/Tbc1d24/Arhgap45/Cyth1/Plekhg2/Racgap1/Rasa1/Mycbp2/Arhgap27/Bcar3/Gnaq/Rin2/Dennd2d/Ralgapa1/Tbc1d1/Tbc1d2/Dennd1c/Arfgef2/Dennd5b/Dock5/Sirpa/Myo9b/Fgd3/Rasgrp2/Fgd2/Dennd4b/Rgs18/Psd4/Arap1/Dennd5a/Arhgef2/Depdc1b/Gdi2/Dock11/Lamtor4/Agap1/Arhgef6/Itsn2/Tbc1d10b/Rgp1/Fgd4/Nc…	GO Molecular Function
Neutrophils	GO:0016773	phosphotransferase activity, alcohol group as acceptor	311	-0.405816	-1.52225	0.000149761	0.00630194	0.00564993	1962	tags=40%, list=30%, signal=29%	Pfkfb3/Taok2/Bub1b/Tec/Map3k15/Prkaa1/Cit/Csnk1g1/Fyn/Aatk/Limk2/Gak/Tlk2/Pip4k2c/Pank3/Irak3/Pdk3/Map4k1/Pxk/Mapk1/Ptk2b/Tyk2/Map3k7/Riok1/Btk/Mapkapk3/Cdk17/Pdpk1/Clk4/Itk/Irak4/Ciita/Ilk/Csnk1g2/Csnk1g3/Hk1/Pip4k2b/Csnk2b/Pik3c2b/Camk2d/Lats1/Pikfyve/Pik3r1/Nek7/Prkacb/Brd2/Csnk2a1/Gsk3a/Ikbke/Dgkz/Srpk2/Lats2/Top1/Pak2/Hk2/Hipk3/Map3k11/Taok3/Csnk1a1/Ikbkb/Aak1/Stk11/Stk26/Cdk9/Mast3/Pdik1l/U…	GO Molecular Function
Neutrophils	mmu04520	Adherens junction - Mus musculus (house mouse)	45	-0.601344	-1.79505	0.000180017	0.0075735	0.00600463	1308	tags=51%, list=21%, signal=41%	Rap1b/Csnk2b/Rac2/Ptprj/Was/Csnk2a1/Ctnnb1/Cdc42/Crebbp/Ptpn6/Myl12a/Iqgap1/Krit1/Igf1r/Rock2/Actn4/Actb/Mapk3/Vcl/Rock1/Ep300/Actn1/Actg1	Kegg Pathway
Neutrophils	mmu04530	Tight junction - Mus musculus (house mouse)	73	-0.534037	-1.70524	0.000194192	0.0075735	0.00600463	1087	tags=41%, list=17%, signal=34%	Was/Prkacb/Cldn1/Hcls1/Arhgef2/Cldn15/Cdc42/Nedd4/Myl6/Stk11/Runx1/Myl12a/Tuba1c/Pcna/Slc9a3r1/Arpc4/Rock2/Actn4/Rap2c/Actb/Myh9/Arpc5/Actr2/Tuba4a/Rock1/Actn1/Vasp/Actr3/Tuba1b/Actg1	Kegg Pathway
Neutrophils	mmu04145	Phagosome - Mus musculus (house mouse)	93	-0.508437	-1.67146	0.000163955	0.0075735	0.00600463	1336	tags=45%, list=21%, signal=36%	Rab5c/Lamp1/Tubb4b/Sec61a1/Tcirg1/Tubb5/Rab5b/Pikfyve/Hgs/Atp6v0d1/Lamp2/H2-T22/Itgb2/H2-Ob/Ncf2/Atp6ap1/H2-DMb2/Tuba1c/Dync1h1/H2-Q4/Rab7/Dync1i2/Fcgr2b/Tap2/Sec22b/Atp6v1a/Coro1a/Atp6v1b2/C3/Tap1/Actb/Olr1/Itgb2l/Tuba4a/Itgam/Cybb/Tuba1b/Ncf1/H2-Q6/Actg1/H2-K1/H2-Q7	Kegg Pathway
Neutrophils	GO:0030031	cell projection assembly	174	-0.452649	-1.60267	6.44348e-05	0.00783269	0.00714209	1506	tags=38%, list=23%, signal=30%	Atxn10/Rdx/Arid1b/Kif3b/Golph3/Anln/Cyfip1/Rilpl2/Snx10/Dctn1/Capg/Cdc14a/Rac2/Fxr2/Pik3r1/Exoc5/Was/S1pr1/Entr1/Gsn/Rala/Fgd3/Rap2a/Fgd2/Arap1/Rhog/Cep19/Fnbp1l/Cdc42/Rhoh/Akirin1/Gdi2/Dock11/Sh2b1/Cdc42ep3/Pqbp1/Stk26/Map4/Arhgef6/Prdx6/Evl/Gsk3b/Fgd4/Nckap1l/Dbnl/Ehd1/Slc9a3r1/Plekhm1/Dynll1/Parvg/Cfl1/Pxn/Syne1/Ablim1/Nck1/Syne2/Ccl5/Klf5/Prkcd/Capzb/Actr2/Vcl/Rock1/Flna/Twf2/Actr3	GO Biological Process
Neutrophils	GO:0008047	enzyme activator activity	264	-0.409877	-1.51887	0.000220852	0.00893603	0.00801149	1957	tags=44%, list=30%, signal=32%	Ppp2r5e/Cab39l/Arhgap17/Psme3/Srgap2/Mob1b/Azin1/Tbc1d2b/Tcf3/Rap1gds1/Fyn/Fzr1/Rasgrp3/Tbc1d20/Rabgap1l/Psme4/Acap2/Tagap/Ralbp1/Adap1/Stap1/Arap2/Map3k7/Rangap1/Btk/Stradb/Pdpk1/Tbc1d24/Arhgap45/Tank/Arf1/Ctsh/Racgap1/Rasa1/Arhgap27/Gnaq/Rin2/Casp3/Ralgapa1/Tbc1d1/Tbc1d2/Wfdc21/Dock5/Ptpa/Myo9b/Rgs18/Ccnt2/Arap1/Ccnt1/Pak2/Ncf2/Depdc1b/Gdi2/Stk11/Mob3a/Agap1/Lgals9/Ppp2r5c/Ppp4r3b/Gnas/Ppp4r3a/…	GO Molecular Function
Neutrophils	GO:0042744	hydrogen peroxide catabolic process	10	0.920505	2.18509	7.87897e-05	0.00903555	0.00823889	4	tags=20%, list=0%, signal=20%	Hba-a1/Hbb-bt	GO Biological Process
Neutrophils	mmu04510	Focal adhesion - Mus musculus (house mouse)	80	-0.516407	-1.67416	0.000265083	0.00918955	0.00728592	1663	tags=52%, list=26%, signal=39%	Tln1/Mapk1/Crkl/Bcl2/Crk/Zyx/Vav1/Pdpk1/Ilk/Rap1b/Pten/Vegfa/Rac2/Pik3r1/Ccnd2/Diaph1/Pak2/Ctnnb1/Cdc42/Grb2/Myl12a/Gsk3b/Pik3cb/Igf1r/Parvg/Rock2/Ppp1ca/Xiap/Actn4/Pxn/Prkcb/Actb/Ppp1r12a/Ccnd3/Mapk3/Vcl/Rock1/Flna/Ppp1cb/Actn1/Vasp/Actg1	Kegg Pathway
Neutrophils	GO:0016301	kinase activity	334	-0.38919	-1.46524	0.000242905	0.0094643	0.00848511	1962	tags=38%, list=30%, signal=28%	Pfkfb3/Taok2/Bub1b/Tec/Map3k15/Prkaa1/Cit/Csnk1g1/Fyn/Aatk/Limk2/Gak/Tlk2/Pip4k2c/Pank3/Irak3/Pdk3/Map4k1/Pxk/Mapk1/Ptk2b/Tyk2/Map3k7/Riok1/Btk/Mapkapk3/Cdk17/Pdpk1/Clk4/Itk/Irak4/Ciita/Ilk/Csnk1g2/Csnk1g3/Hk1/Pip4k2b/Csnk2b/Pik3c2b/Camk2d/Lats1/Ak2/Pikfyve/Pik3r1/Nek7/Prkacb/Brd2/Csnk2a1/Gsk3a/Ikbke/Dgkz/Srpk2/Lats2/Top1/Pak2/Hk2/Hipk3/Map3k11/Taok3/Csnk1a1/Ikbkb/Aak1/Stk11/Stk26/Cdk9/Mast3/Pdik…	GO Molecular Function
Neutrophils	mmu04360	Axon guidance - Mus musculus (house mouse)	54	-0.567545	-1.73605	0.000373849	0.00986771	0.00782359	1923	tags=63%, list=30%, signal=44%	Sema4a/Srgap2/Fyn/Limk2/Mapk1/Sema4b/Pdpk1/Ilk/Rasa1/Camk2d/Rac2/Nras/Pik3r1/Ptpn11/Gnai2/Pak2/Cdc42/Myl12a/Ppp3cb/Gsk3b/Cxcr4/Pik3cb/Gnai3/Ppp3r1/Rock2/Plxnc1/Plcg2/Cfl1/Nfatc3/Ablim1/Nck1/Mapk3/Rock1/Ppp3ca	Kegg Pathway
Neutrophils	mmu04810	Regulation of actin cytoskeleton - Mus musculus (house mouse)	103	-0.498613	-1.65874	0.000411155	0.00986771	0.00782359	1175	tags=38%, list=19%, signal=31%	Rac2/Nras/Pikfyve/Pik3r1/Gsn/Fgd3/Diaph1/Pak2/Itgb2/Cdc42/Gna13/Arhgef6/Myl12a/Cxcr4/Nckap1l/Pik3cb/Iqgap1/Arpc4/Arhgef1/Rock2/Ppp1ca/Cfl1/Actn4/Pxn/Actb/Myh9/Arpc5/Itgb2l/Ppp1r12a/Mapk3/Actr2/Vcl/Rock1/Ppp1cb/Itgam/Actn1/Actr3/Cyfip2/Actg1	Kegg Pathway
Neutrophils	mmu04218	Cellular senescence - Mus musculus (house mouse)	100	-0.491539	-1.63005	0.000405064	0.00986771	0.00782359	1163	tags=34%, list=18%, signal=28%	Nras/Pik3r1/Ccna2/H2-T22/Mdm2/Fbxw11/Ccnd2/Hipk3/Rbl1/Nfatc1/Rela/Ppp3cb/H2-Q4/Pik3cb/Calm3/Mapk14/Hipk2/E2f2/Ppp3r1/Ppp1ca/Nfatc3/Cdc25a/Cdk2/Ccnd3/Mapk3/Capn1/Ppp1cb/Ppp3ca/Nfkb1/Hipk1/Ets1/H2-Q6/H2-K1/H2-Q7	Kegg Pathway
Neutrophils	mmu04144	Endocytosis - Mus musculus (house mouse)	162	-0.449774	-1.56063	0.000341354	0.00986771	0.00782359	1484	tags=38%, list=23%, signal=30%	Vps4b/Arf1/Cyth1/Rab31/Igf2r/Snx4/Ldlr/Rab5c/Snx5/Ap2b1/Ldlrap1/Ap2s1/Tsg101/Vps35/Rab5b/Arfgef2/Hgs/Wipf2/H2-T22/Vps26a/Mdm2/Psd4/Arap1/Cdc42/Nedd4/Snx2/Agap1/Vps26b/Rab10/Grk6/H2-Q4/Rab7/Cxcr4/Git2/Epn1/Ist1/Ehd1/Vps37b/Sh3kbp1/Eps15/Arpc4/Igf1r/Cltc/Ap2a2/Grk2/Kif5b/Acap1/Wipf1/Capza1/Arpc5/Pdcd6ip/Cbl/Arap3/Capzb/Actr2/Arrb2/Arfgef1/Hspa8/Actr3/H2-Q6/H2-K1/H2-Q7	Kegg Pathway
Neutrophils	GO:0001906	cell killing	83	-0.532488	-1.71659	8.94345e-05	0.0100663	0.0091788	909	tags=39%, list=14%, signal=34%	Slamf6/Lyz2/Lgals9/Ptpn6/Stxbp2/Ap1g1/Ppp3cb/H2-Q4/Nckap1l/Tap2/Syk/Coro1a/Cd55/C3/Tap1/Rab27a/Stx11/Clec2d/Kif5b/Rps19/Hsp90ab1/Gimap3/Arrb2/Itgam/Ceacam1/Hspa8/Ncf1/Ltf/H2-Q6/B2m/H2-K1/H2-Q7	GO Biological Process
Neutrophils	mmu04390	Hippo signaling pathway - Mus musculus (house mouse)	52	-0.560053	-1.70681	0.000507727	0.011315	0.00897111	1208	tags=42%, list=19%, signal=35%	Ppp2ca/Lats1/Sav1/Limd1/Fbxw11/Lats2/Ccnd2/Itgb2/Ctnnb1/Ywhab/Gsk3b/Id2/Ywhah/Ppp1ca/Actb/Ywhae/Itgb2l/Ccnd3/Ywhaz/Mob1a/Ppp1cb/Actg1	Kegg Pathway
Neutrophils	GO:0032989	cellular component morphogenesis	256	-0.418351	-1.54529	0.00010394	0.0114863	0.0104735	1337	tags=34%, list=21%, signal=28%	Cyfip1/Pten/Rere/Mycbp2/Tmod3/Vegfa/Usp9x/Dicer1/Plec/Rac2/Usp33/B4galt6/Adnp/Flot1/Pikfyve/Mef2a/Ndufs6/Myo9b/Rap2a/Ptpn11/Rhog/Pak2/Prkar1a/Ctnnb1/Cdc42/Rhoh/Taok3/Creb1/Nedd4/Snx2/Ss18l2/Adam10/Stk11/Pqbp1/Rab10/Itsn2/Evl/Gsk3b/Cxcr4/Nckap1l/Apoe/Dbnl/Ube3a/Iqgap1/Ist1/Foxp1/Cflar/Macf1/Pafah1b1/Rpl4/Ncam1/Map4k4/Lmtk2/Abi1/Igf1r/Ywhah/Mark2/Nin/Rock2/Mef2c/Dock10/Trak2/Gdi1/Plxnc1/Cfl1/Bcl11a…	GO Biological Process
Neutrophils	GO:0031342	negative regulation of cell killing	11	-0.826796	-1.8556	0.000133888	0.0137927	0.0125766	796	tags=82%, list=12%, signal=72%	Lgals9/Ppp3cb/Nckap1l/Tap2/Tap1/Clec2d/Hsp90ab1/Arrb2/Ceacam1	GO Biological Process
Neutrophils	GO:0097581	lamellipodium organization	46	-0.591874	-1.74722	0.000137277	0.0139061	0.01268	1419	tags=52%, list=22%, signal=41%	Golph3/Cyfip1/Rac2/Pik3r1/Was/S1pr1/Myo9b/Cdc42/Akirin1/Sh2b1/Snx2/Arhgef6/Fgd4/Abi1/Cfl1/Pxn/Ablim1/Arpc5/Nck1/Capzb/Actr2/Vcl/Twf2/Actr3	GO Biological Process
Neutrophils	GO:0002449	lymphocyte mediated immunity	155	-0.461257	-1.60959	0.000142173	0.014166	0.012917	1187	tags=35%, list=18%, signal=30%	Tcirg1/Gapt/Rnf19b/Was/H2-T22/Il18rap/Cd74/Pirb/Sash3/H2-Ob/Unc93b1/Slamf6/Nsd2/H2-DMb2/Lgals9/Ptpn6/Ap1g1/Ppp3cb/Swap70/H2-Q4/Fcgr2b/C1rl/Nckap1l/Tap2/Hspd1/Coro1a/Cd55/C3/Malt1/Tap1/Rab27a/Stx11/Iglc3/Clec2d/Kif5b/Ighg2b/Pou2f2/Gimap3/Iglc2/Prkcd/Cr2/Arrb2/Cd24a/Vsir/Cd19/Ighd/Ceacam1/Hspa8/H2-Q6/B2m/H2-K1/H2-Q7/Ighm/Igha/Igkc	GO Biological Process
Neutrophils	GO:1905114	cell surface receptor signaling pathway involved in cell-cell signaling	168	-0.450561	-1.58942	0.000148294	0.0145376	0.0132559	1797	tags=44%, list=28%, signal=33%	Wls/Psen1/Fam53b/Pygo2/Foxo1/Ptk2b/Ctdnep1/Brd7/G3bp1/Ubr5/Cdc73/Jade1/Tbc1d24/Ilk/Dvl1/Usp34/Csnk1g2/Lrrfip2/Tmem170b/Csnk1g3/Pten/Csnk2b/Gnaq/Rbpj/Lats1/Pbxip1/Tnks2/Usp47/Vps35/Frmd8/Ppm1a/Tle3/Csnk2a1/Gsk3a/Amfr/Tbl1xr1/Limd1/Fbxw11/Lats2/Tle5/Smarca4/Ctnnb1/Depdc1b/Csnk1a1/Stk11/Ldb1/Grk6/Hdac1/Stk4/Gsk3b/Hhex/Apoe/Reck/Mapk14/Slc9a3r1/Macf1/Vcp/C3/Mark2/Rps12/Mef2c/Xiap/Grk2/Ccdc88c/Lrrk2/C…	GO Biological Process
Neutrophils	GO:0000245	spliceosomal complex assembly	36	-0.630954	-1.78779	0.000152539	0.0146544	0.0133623	1342	tags=50%, list=21%, signal=40%	Ncbp1/Scaf11/Khdc4/Setx/Srpk2/Luc7l2/Sf3b1/Luc7l/Ythdc1/Srsf1/Srsf6/Rbm5/Ddx39b/Usp39/Luc7l3/Celf1/Celf2/Mbnl1	GO Biological Process
Neutrophils	GO:0008037	cell recognition	49	-0.585012	-1.74423	0.000157254	0.0147044	0.0134079	714	tags=29%, list=11%, signal=26%	B4galt1/Cct6a/Dock2/Ncam1/C3/Iglc3/Dock8/Ighg2b/Iglc2/Ywhaz/Ighd/Ighm/Igha/Igkc	GO Biological Process
Neutrophils	GO:0032535	regulation of cellular component size	165	-0.457881	-1.61044	0.00016211	0.0149289	0.0136126	1337	tags=36%, list=21%, signal=29%	Cyfip1/Rasa1/Pten/Tmod3/Vegfa/Clec2i/Lats1/Capg/Npm1/Adnp/Tmsb10/Slc12a6/Was/Gsn/Hcls1/Creb1/Lamtor4/Cdc42ep3/Grb2/Lima1/Swap70/Evl/Gsk3b/Nckap1l/Apoe/Ogt/Dbnl/Fchsd2/Ist1/Slc9a3r1/Macf1/Pafah1b1/Rpl4/Sptbn1/Add1/Arpc4/Mtpn/Coro1a/Add3/Tmem123/Gdi1/Cfl1/Bcl11a/Capza1/Hsp90ab1/Mlst8/Arpc5/Nck1/Prkcd/Capzb/Cotl1/Dstn/Capn1/Arfgef1/Twf2/Vasp/Actr3/Wdr1/Cyfip2	GO Biological Process
Neutrophils	GO:0016209	antioxidant activity	32	0.696916	2.1294	0.000467981	0.0164105	0.0147127	194	tags=16%, list=3%, signal=15%	Hba-a1/Hbb-bt/Gpx4/Hp/Alox5ap	GO Molecular Function
Neutrophils	GO:0097529	myeloid leukocyte migration	105	0.505771	1.88253	0.000190239	0.017004	0.0155047	323	tags=24%, list=5%, signal=23%	Prtn3/Il1b/Ccl6/Retnlg/Csf3r/Dusp1/Pla2g7/Jaml/Fcer1g/Cd300a/Cxcr2/Mif/Ppib/Csf1r/Ppia/Ninj1/Sell/Fcgr3/Csf1/Lgals3/Spi1/Cd177/Hmgb1/Ccr1/Selenok	GO Biological Process
Neutrophils	mmu04270	Vascular smooth muscle contraction - Mus musculus (house mouse)	39	-0.582931	-1.6969	0.000863576	0.0171782	0.0136197	905	tags=49%, list=14%, signal=42%	Prkacb/Calcrl/Gna13/Myl6/Adcy7/Gnas/Ptgir/Calm3/Arhgef1/Plcb2/Rock2/Ppp1ca/Prkcb/Myh9/Prkcd/Ppp1r12a/Mapk3/Rock1/Ppp1cb	Kegg Pathway
Neutrophils	mmu04015	Rap1 signaling pathway - Mus musculus (house mouse)	83	-0.500198	-1.62437	0.000880932	0.0171782	0.0136197	1663	tags=52%, list=26%, signal=39%	Tln1/Mapk1/Crkl/Crk/Vav1/Lat/Itgal/Rap1b/Vegfa/Gnaq/Rac2/Nras/Pik3r1/Rala/Rasgrp2/Gnai2/Itgb2/Ctnnb1/Cdc42/Adcy7/Lcp2/Gnas/Ralb/Evl/Prkd3/Pik3cb/Calm3/Mapk14/Krit1/Prkd2/Igf1r/Gnai3/Plcb2/Prkcb/Actb/Itgb2l/Rgs14/Arap3/Mapk3/Sipa1/Itgam/Vasp/Actg1	Kegg Pathway
Neutrophils	GO:0031386	protein tag	10	0.892109	2.18509	0.000541053	0.0172481	0.0154636	313	tags=70%, list=5%, signal=67%	Ubb/Isg15/Uba52/Ubc/Rps27a/Nedd8/Sumo2	GO Molecular Function
Neutrophils	GO:0020037	heme binding	28	0.726459	2.12483	0.000526368	0.0172481	0.0154636	330	tags=21%, list=5%, signal=20%	Hba-a1/Hbb-bt/Cyp4f18/Steap4/Hmox1/Cyba	GO Molecular Function
Neutrophils	mmu04978	Mineral absorption - Mus musculus (house mouse)	14	0.837375	2.275	0.000956446	0.0175536	0.0139173	442	tags=57%, list=7%, signal=53%	Ftl1/Fth1/Atox1/Trf/Atp1a3/Atp2b1/Hmox1/Atp1a1	Kegg Pathway
Neutrophils	mmu04916	Melanogenesis - Mus musculus (house mouse)	31	-0.606241	-1.69375	0.00108597	0.0188235	0.0149242	1383	tags=58%, list=22%, signal=46%	Dvl1/Gnaq/Camk2d/Nras/Prkacb/Gnai2/Ctnnb1/Creb1/Crebbp/Adcy7/Gnas/Gsk3b/Calm3/Gnai3/Plcb2/Prkcb/Mapk3/Ep300	Kegg Pathway
Neutrophils	mmu05215	Prostate cancer - Mus musculus (house mouse)	54	-0.547158	-1.67369	0.00116254	0.0190901	0.0151355	1659	tags=54%, list=26%, signal=40%	Foxo1/Mapk1/Bcl2/Pdpk1/Zeb1/Pten/Nras/Pik3r1/Mdm2/Ctnnb1/Creb1/Crebbp/Ikbkb/Grb2/Rela/Erg/Gsk3b/Pik3cb/Igf1r/E2f2/Mmp9/Atf4/Cdk2/Hsp90ab1/Hsp90b1/Hsp90aa1/Mapk3/Ep300/Nfkb1	Kegg Pathway
Neutrophils	mmu04610	Complement and coagulation cascades - Mus musculus (house mouse)	12	-0.773347	-1.79853	0.00125105	0.0195165	0.0154736	949	tags=67%, list=15%, signal=57%	F5/Itgb2/Plaur/Cd55/C3/Itgb2l/Cr2/Itgam	Kegg Pathway
Neutrophils	mmu04720	Long-term potentiation - Mus musculus (house mouse)	37	-0.584816	-1.66967	0.00131619	0.0195549	0.015504	1308	tags=51%, list=21%, signal=41%	Rap1b/Gnaq/Camk2d/Nras/Prkacb/Crebbp/Ppp3cb/Calm3/Plcb2/Rps6ka3/Ppp3r1/Ppp1ca/Rps6ka1/Atf4/Prkcb/Mapk3/Ep300/Ppp1cb/Ppp3ca	Kegg Pathway
Neutrophils	mmu05163	Human cytomegalovirus infection - Mus musculus (house mouse)	131	-0.443767	-1.5119	0.00141983	0.0201357	0.0159645	1263	tags=41%, list=20%, signal=34%	Vegfa/Bak1/Gnaq/Rac2/Casp3/Nras/Pik3r1/Sp1/H2-T22/Prkacb/Tapbp/Mdm2/Gnai2/Ctnnb1/Creb1/Gna13/Ikbkb/Adcy7/Grb2/Nfatc1/Rela/Gnas/Ppp3cb/H2-Q4/Gsk3b/Cxcr4/Tap2/Pik3cb/Calm3/Mapk14/Gnai3/Arhgef1/Plcb2/Gnb1/E2f2/Ppp3r1/Rock2/Tap1/Rps6kb1/Stat3/Nfatc3/Atf4/Pxn/Prkcb/Ccl5/Gnb2/Mapk3/Rock1/Ppp3ca/Nfkb1/H2-Q6/B2m/H2-K1/H2-Q7	Kegg Pathway
Neutrophils	GO:0005200	structural constituent of cytoskeleton	24	-0.660181	-1.75226	0.000678902	0.0204059	0.0182946	501	tags=62%, list=8%, signal=58%	Tubb4b/Plec/Tubb5/Tuba1c/Sptbn1/Add1/Arpc4/Add3/Actb/Arpc5/Actr2/Tuba4a/Actr3/Tuba1b/Actg1	GO Molecular Function
Neutrophils	GO:0032271	regulation of protein polymerization	99	-0.494923	-1.6337	0.000254112	0.0205933	0.0187776	1523	tags=43%, list=24%, signal=34%	Gda/Rdx/Plekhg2/Hip1r/Cyfip1/Rasa1/Tmod3/Clec2i/Slain2/Dctn1/Lats1/Capg/Tmsb10/Gsn/Numa1/Hcls1/Cdc42ep3/Grb2/Evl/Nckap1l/Dbnl/Fchsd2/Sptbn1/Add1/Arpc4/Mtpn/Coro1a/Add3/Cfl1/Capza1/Mlst8/Arpc5/Nck1/Prkcd/Hsp90aa1/Capzb/Cotl1/Capn1/Arfgef1/Twf2/Vasp/Actr3/Cyfip2	GO Biological Process
Neutrophils	GO:0042100	B cell proliferation	54	-0.557937	-1.68826	0.000269913	0.0211576	0.0192922	1319	tags=57%, list=20%, signal=46%	Pten/Inpp5d/Cd27/Tnfrsf13b/Casp3/Gapt/Tnfrsf21/Cd38/Cd74/Sash3/Rc3h1/Tirap/Fcgr2b/Mzb1/Nckap1l/Ikzf3/Hspd1/Pkn1/Cd22/Blk/Tnfrsf13c/Mef2c/Tnfsf13b/Siglecg/Prkcd/Cr2/Cd24a/Cd19/Ighd/Cd79a/Ighm	GO Biological Process
Neutrophils	GO:0120035	regulation of plasma membrane bounded cell projection organization	278	-0.402526	-1.49887	0.000287863	0.0212727	0.0193971	1844	tags=46%, list=28%, signal=34%	Arpc2/Khdc3/Map2k1/Itpr1/Itga6/Odf2/Pld1/Dnm1l/Rnf6/Thoc2/Cyld/Tiam1/Acap3/Zfyve27/Ezh2/Sema4a/Kidins220/Ptpn9/Cit/Coro1c/Fyn/Limk2/Gak/Psen1/Cln3/Vim/Stap1/Htt/Ptk2b/Crkl/Def8/Katna1/Gfi1/Sema4b/Caprin1/Crk/Ythdf1/Pdlim5/Tbc1d24/Rdx/Golga2/Fbxo38/Ilk/Cers2/Dvl1/Anln/Cyfip1/Pten/Mycbp2/Vegfa/Rac2/Fxr2/Adnp/Vps35/Pik3r1/Was/Entr1/Rala/Gsk3a/Setx/Cd38/Rap2a/Mdm2/Arap1/Dennd5a/Rhog/Pak2/Neu1/Abhd17b…	GO Biological Process
Neutrophils	GO:0010562	positive regulation of phosphorus metabolic process	355	-0.386894	-1.46968	0.000290496	0.0212727	0.0193971	1342	tags=32%, list=21%, signal=26%	Ncbp1/Rasa1/Wdfy2/Sppl3/Vegfa/Csnk2b/Cd3e/Bcar3/Ppp2ca/Ppp1r16b/Lats1/Fxr2/Pih1d1/Npm1/Adnp/Ptprj/Flot1/Pik3r1/Ptpa/Gsk3a/Dgkz/Cd74/Rap2a/Ptpn11/Pirb/Fbh1/Fgd2/Camp/Ccnd2/Pak2/Hcls1/Arhgef2/Ptbp1/Cdc42/Map3k11/Taok3/Plaur/Stk11/Mob3a/Lgals9/Nedd9/Sdcbp/Tab2/Xbp1/Gnas/Ralb/Tirap/Stk4/Gsk3b/Fgd4/Cxcr4/Camkk2/Nckap1l/Csk/Ogt/Rack1/Lck/Iqgap1/Irak1/Calm3/Rpl5/Cab39/Vcp/Osbpl8/Prkd2/Dazap2/Lmtk2/Abi1/…	GO Biological Process
Neutrophils	GO:0045937	positive regulation of phosphate metabolic process	355	-0.386894	-1.46968	0.000290496	0.0212727	0.0193971	1342	tags=32%, list=21%, signal=26%	Ncbp1/Rasa1/Wdfy2/Sppl3/Vegfa/Csnk2b/Cd3e/Bcar3/Ppp2ca/Ppp1r16b/Lats1/Fxr2/Pih1d1/Npm1/Adnp/Ptprj/Flot1/Pik3r1/Ptpa/Gsk3a/Dgkz/Cd74/Rap2a/Ptpn11/Pirb/Fbh1/Fgd2/Camp/Ccnd2/Pak2/Hcls1/Arhgef2/Ptbp1/Cdc42/Map3k11/Taok3/Plaur/Stk11/Mob3a/Lgals9/Nedd9/Sdcbp/Tab2/Xbp1/Gnas/Ralb/Tirap/Stk4/Gsk3b/Fgd4/Cxcr4/Camkk2/Nckap1l/Csk/Ogt/Rack1/Lck/Iqgap1/Irak1/Calm3/Rpl5/Cab39/Vcp/Osbpl8/Prkd2/Dazap2/Lmtk2/Abi1/…	GO Biological Process
Neutrophils	GO:0042026	protein refolding	12	-0.805351	-1.84871	0.000308133	0.0220333	0.0200907	458	tags=42%, list=7%, signal=39%	Dnaja1/Hspd1/Hsp90aa1/Hspa8/B2m	GO Biological Process
Neutrophils	GO:0198738	cell-cell signaling by wnt	152	-0.449697	-1.57067	0.000321712	0.0224755	0.0204938	1797	tags=44%, list=28%, signal=33%	Wls/Psen1/Fam53b/Pygo2/Foxo1/Ctdnep1/Brd7/G3bp1/Ubr5/Cdc73/Jade1/Ilk/Dvl1/Usp34/Csnk1g2/Lrrfip2/Tmem170b/Csnk1g3/Pten/Csnk2b/Gnaq/Rbpj/Lats1/Pbxip1/Tnks2/Usp47/Vps35/Frmd8/Ppm1a/Tle3/Csnk2a1/Gsk3a/Amfr/Tbl1xr1/Limd1/Fbxw11/Lats2/Tle5/Smarca4/Ctnnb1/Depdc1b/Csnk1a1/Stk11/Ldb1/Grk6/Hdac1/Stk4/Gsk3b/Hhex/Apoe/Reck/Mapk14/Slc9a3r1/Macf1/Vcp/Mark2/Rps12/Xiap/Ccdc88c/Lrrk2/Cul3/Tmem131l/Notch1/Wnk1/Cma…	GO Biological Process
Neutrophils	GO:0005518	collagen binding	11	0.825209	2.0689	0.000842835	0.0233332	0.0209191	348	tags=36%, list=5%, signal=34%	Srgn/Tgfbi/Ctss/Itgb1	GO Molecular Function
Neutrophils	GO:0030048	actin filament-based movement	35	-0.632872	-1.78242	0.000348009	0.0234992	0.0214273	1217	tags=54%, list=19%, signal=44%	Camk2d/Was/Wipf2/Gsn/Myo9b/Gpd1l/Fnbp1l/Myl6/Evl/Myo1f/Myo5a/Wipf1/Actn4/Ccdc88c/Myh9/Syne2/Rock1/Flna/Sun2	GO Biological Process
Neutrophils	GO:0140104	molecular carrier activity	39	0.644767	1.98325	0.000881191	0.023714	0.0212605	173	tags=10%, list=3%, signal=10%	Hba-a1/Hbb-bt/Atox1/Trf	GO Molecular Function
Neutrophils	GO:0004875	complement receptor activity	6	-0.875296	-1.69879	0.000901671	0.023714	0.0212605	151	tags=33%, list=2%, signal=33%	Cr2/Fpr2	GO Molecular Function
Neutrophils	GO:0003729	mRNA binding	204	-0.407482	-1.48187	0.00094824	0.0243305	0.0218132	1711	tags=41%, list=26%, signal=31%	Copa/Ireb2/Slbp/Hnrnpa0/Eif4g3/Rpl30/Spen/Supt5/G3bp1/Khsrp/Ythdf1/Tra2b/Rpl7/Rps26/Angel2/Ncbp3/Etf1/Rbm15b/Dhx9/Pum1/Ncbp1/Rpl41/Rbm38/Fxr2/Hnrnpu/N4bp1/Rps14/G3bp2/Tial1/Sf1/Luc7l2/Cpsf7/Nxf1/Snrnp70/Syncrip/Rc3h1/Lsm14a/Larp1/Ptbp1/Fus/Rbm25/Cpsf6/Eif4enif1/Marf1/Khnyn/Rnf20/Srsf3/Sf3b1/Luc7l/Eef1a1/Rc3h2/Khdrbs1/Hnrnpc/Chtop/Fubp1/Rpl5/Ythdc1/Tia1/Hnrnpa2b1/Srsf1/Rbms1/Hnrnpl/Elavl1/Srsf6/Rb…	GO Molecular Function
Neutrophils	GO:0090066	regulation of anatomical structure size	195	-0.430421	-1.53906	0.000375805	0.0248276	0.0226386	1337	tags=35%, list=21%, signal=29%	Cyfip1/Rasa1/Pten/Tmod3/Vegfa/Clec2i/Lats1/Capg/Npm1/Adnp/Tmsb10/Slc12a6/Was/Dock5/Gsn/Cd38/Alox5/Hcls1/Creb1/Lamtor4/Cdc42ep3/Grb2/Lima1/Swap70/Evl/Gsk3b/Nckap1l/Apoe/Ogt/Dbnl/Fchsd2/Ist1/Slc9a3r1/Macf1/Pafah1b1/Rpl4/Sptbn1/Ptgs1/Add1/Arpc4/Mtpn/Coro1a/Add3/Tmem123/Rock2/Gdi1/Grk2/Cfl1/Bcl11a/Capza1/Lrrk2/Hsp90ab1/Mlst8/Arpc5/Nck1/Prkcd/Capzb/Cotl1/Dstn/Capn1/Arfgef1/G6pdx/Rock1/Twf2/Vasp/Actr3/…	GO Biological Process
Neutrophils	GO:0048771	tissue remodeling	66	-0.534133	-1.66836	0.00038851	0.0251904	0.0229693	1291	tags=47%, list=20%, signal=38%	Vegfa/Inpp5d/Bak1/Snx10/Rbpj/Rac2/Tcirg1/S1pr1/Cd38/Mdm2/Ctnnb1/Rab7/Gsk3b/Csk/Plekhm1/Syk/Adam8/Mmp9/Rock2/Mef2c/Nfatc3/Pbrm1/Capn1/Rab3d/Cd24a/Rock1/Flna/Rassf2/Ppp3ca/Nfkb1/Ceacam1	GO Biological Process
Neutrophils	GO:1903311	regulation of mRNA metabolic process	203	-0.429871	-1.54628	0.000389584	0.0251904	0.0229693	1601	tags=40%, list=25%, signal=31%	Supt5/Khsrp/Cdc73/Ythdf1/Tra2b/Papola/Angel2/Wtap/Rbm15b/Cnot3/Dhx9/Pum1/Ncbp1/Casc3/Tut7/Vegfa/Safb2/Dicer1/Rbm38/Srsf2/Gtpbp1/Fxr2/Npm1/Hnrnpu/Wdr77/Ikbke/Sf1/Srpk2/Cpsf7/Snrnp70/Ccnt1/Syncrip/Rc3h1/Larp1/Ptbp1/Fus/Rbm25/Cpsf6/Tob1/Eif4enif1/Zbtb7a/Cdk9/Rnf20/Mbnl3/Prdx6/Cnot1/Tra2a/Srsf3/Tirap/Rbm39/U2af2/Rc3h2/Cnot7/Khdrbs1/Hnrnpc/Ythdc1/Tia1/Hnrnpa2b1/Srsf1/Acin1/Hnrnpl/Elavl1/Srsf6/Rbm5/Csd…	GO Biological Process
Neutrophils	mmu04814	Motor proteins - Mus musculus (house mouse)	66	-0.51041	-1.60171	0.00189462	0.025701	0.020377	1257	tags=38%, list=20%, signal=31%	Tubb4b/Kif11/Tpm3/Dctn1/Tubb5/Myo9b/Actr1a/Myl6/Hook3/Kif21b/Myl12a/Tuba1c/Dync1h1/Dync1i2/Myo1f/Myo5a/Dynll1/Kif5b/Capza1/Actb/Myh9/Capzb/Tuba4a/Tuba1b/Actg1	Kegg Pathway
Neutrophils	GO:0001911	negative regulation of leukocyte mediated cytotoxicity	10	-0.819769	-1.80446	0.000454434	0.0284747	0.0259641	796	tags=80%, list=12%, signal=70%	Lgals9/Ppp3cb/Nckap1l/Tap2/Tap1/Clec2d/Arrb2/Ceacam1	GO Biological Process
Neutrophils	mmu05100	Bacterial invasion of epithelial cells - Mus musculus (house mouse)	38	-0.574735	-1.65876	0.00223452	0.0290488	0.0230313	927	tags=42%, list=15%, signal=36%	Rhog/Hcls1/Ctnnb1/Cdc42/Elmo1/Pik3cb/Arpc4/Cltc/Pxn/Actb/Arpc5/Cbl/Actr2/Vcl/Actr3/Actg1	Kegg Pathway
Neutrophils	GO:0071826	ribonucleoprotein complex subunit organization	119	-0.471796	-1.59722	0.000513099	0.0305747	0.0278789	1363	tags=36%, list=21%, signal=29%	Dhx9/Ncbp1/Scaf11/Dicer1/Adar/Pih1d1/Wdr77/Rps14/Khdc4/Setx/Traf7/Srpk2/Luc7l2/Cpsf7/Rps27/Mdn1/Rps28/Cpsf6/Sf3b1/Luc7l/Rpl5/Ythdc1/Vcp/Eif4b/Srsf1/Usp4/Srsf6/Rbm5/Rpl13a/Ddx39b/Ago2/Kif5b/Rps19/Rps15/Usp39/Hsp90ab1/Rpl23a/Luc7l3/Celf1/Celf2/Hsp90aa1/Eif3a/Mbnl1	GO Biological Process
Neutrophils	GO:0034764	positive regulation of transmembrane transport	81	-0.506476	-1.62812	0.000538431	0.0314672	0.0286927	1059	tags=37%, list=16%, signal=31%	Mef2a/Ptpn11/Alox5/C2cd5/Ikbkb/Acsl5/Ppp3cb/Lcn2/Calm3/Mapk14/Slc9a3r1/Osbpl8/Myo5a/C3/Ppp3r1/Cox17/Chp1/Plcg2/Cfl1/Glrx/Kif5b/Gimap3/Acsl1/Prkcd/Stk39/Wnk1/G6pdx/Flna/Cd19/Ppp3ca	GO Biological Process
Neutrophils	GO:0060042	retina morphogenesis in camera-type eye	12	-0.793415	-1.82131	0.000573064	0.0328593	0.0299621	552	tags=58%, list=9%, signal=53%	Man2a1/Hipk2/Prom1/Stat3/Notch1/Ikzf1/Hipk1	GO Biological Process
Neutrophils	mmu04022	cGMP-PKG signaling pathway - Mus musculus (house mouse)	62	-0.513229	-1.60035	0.00274416	0.0342471	0.0271527	1036	tags=40%, list=16%, signal=34%	Mef2a/Gnai2/Creb1/Gna13/Adcy7/Nfatc1/Ppp3cb/Mef2d/Calm3/Gnai3/Plcb2/Ppp3r1/Rock2/Ppp1ca/Mef2c/Nfatc3/Atf4/Atp2a3/Pde2a/Ppp1r12a/Mapk3/Rock1/Ppp1cb/Ppp3ca/Vasp	Kegg Pathway
Neutrophils	mmu04611	Platelet activation - Mus musculus (house mouse)	61	-0.510406	-1.58694	0.00318746	0.0382495	0.030326	1308	tags=51%, list=21%, signal=41%	Rap1b/Gnaq/Stim1/Pik3r1/Prkacb/Rasgrp2/Fermt3/Gnai2/Gna13/Adcy7/Lcp2/Myl12a/Gnas/Ptgir/Pik3cb/Mapk14/Ptgs1/Gnai3/Arhgef1/Plcb2/Syk/Rock2/Ppp1ca/Plcg2/Actb/Ppp1r12a/Mapk3/Rock1/Ppp1cb/Vasp/Actg1	Kegg Pathway
Neutrophils	mmu04612	Antigen processing and presentation - Mus musculus (house mouse)	45	-0.550712	-1.64391	0.00332925	0.0384714	0.0305019	1106	tags=40%, list=17%, signal=33%	Nfya/H2-T22/Tapbp/Cd74/H2-Ob/Creb1/H2-DMb2/Psme2b/H2-Q4/Tap2/Tap1/Hsp90ab1/Hsp90aa1/Hspa8/H2-Q6/B2m/H2-K1/H2-Q7	Kegg Pathway
Neutrophils	GO:0001909	leukocyte mediated cytotoxicity	63	-0.531938	-1.65116	0.000718517	0.0397013	0.0362009	796	tags=44%, list=12%, signal=39%	Rnf19b/H2-T22/Il18rap/Slamf6/Lgals9/Ptpn6/Stxbp2/Ap1g1/Ppp3cb/H2-Q4/Nckap1l/Tap2/Coro1a/Tap1/Rab27a/Stx11/Clec2d/Kif5b/Gimap3/Arrb2/Itgam/Ceacam1/Hspa8/Ncf1/H2-Q6/B2m/H2-K1/H2-Q7	GO Biological Process
[truncated: 8 more rows]

## Sheet: NK_pathway
ClusterID	ID	Description	setSize	enrichmentScore	NES	pvalue	p.adjust	qvalue	rank	leading_edge	core_enrichment	PathwayDB
[truncated: 86 more rows]

## Sheet: NKT_pathway
ClusterID	ID	Description	setSize	enrichmentScore	NES	pvalue	p.adjust	qvalue	rank	leading_edge	core_enrichment	PathwayDB
[truncated: 147 more rows]

[truncated: 1 more sheets: Progenitor_pathway]
