# Supplementary material for: Chronic hypoxia disrupts T regulatory cell phenotype contributing to the emergence of exTreg-TH17 cells
Source: Front Physiol. 2024 Jan 29;14:1304732. doi: 10.3389/fphys.2023.1304732 (PMC10859758; doi:10.3389/fphys.2023.1304732)
Supplement: Supplementary file 7 [file Table7.xlsx]

## Sheet: Bosc_Dec2023_CH6vs2_markers
	p_val	avg_log2FC	pct.1	pct.2	p_val_adj	-log adj pvalue
Srgn	9.8266e-63	-2.11191	0.784	0.983	1.58778e-58	57.7992
Eea1	2.94254e-54	-3.13257	0.364	0.834	4.75456e-50	49.3229
Tnfsf8	7.99929e-49	-2.9795	0.407	0.817	1.29253e-44	43.8886
Maf	2.18614e-48	-2.73436	0.451	0.839	3.53236e-44	43.4519
S100a6	1.39661e-44	-3.74969	0.191	0.687	2.25664e-40	39.6465
Gpm6b	3.70956e-41	-3.45885	0.167	0.69	5.99391e-37	36.2223
Cd82	3.15474e-38	-1.88993	0.58	0.91	5.09743e-34	33.2926
Nfatc1	3.10079e-30	-2.09995	0.395	0.794	5.01025e-26	25.3001
Cd200	1.26216e-29	-2.8012	0.259	0.637	2.0394e-25	24.6905
Hif1a	2.43358e-29	-2.00685	0.494	0.808	3.93218e-25	24.4054
Ptpn11	3.52601e-29	-2.47538	0.247	0.69	5.69732e-25	24.2443
S100a11	9.35359e-27	-1.59732	0.667	0.887	1.51135e-22	21.8206
Ly6a	9.74822e-27	-2.64236	0.228	0.693	1.57512e-22	21.8027
Malt1	3.85872e-26	-2.09332	0.42	0.746	6.23493e-22	21.2052
Lag3	1.96535e-25	-3.22824	0.117	0.583	3.17562e-21	20.4982
Ift80	3.79053e-25	2.76691	0.556	0.152	6.12475e-21	20.2129
S100a4	6.71426e-25	-3.88754	0.123	0.482	1.08489e-20	19.9646
Icos	1.03875e-24	-2.09255	0.309	0.735	1.67841e-20	19.7751
Cd4	9.41643e-24	-1.41668	0.611	0.882	1.52151e-19	18.8177
Zap70	1.12574e-23	-1.78329	0.432	0.758	1.81897e-19	18.7402
Tbc1d4	1.84759e-23	-1.57487	0.654	0.848	2.98533e-19	18.525
Smc4	7.40912e-23	1.15871	0.84	0.685	1.19717e-18	17.9218
Tnfaip8	8.59235e-23	-1.75879	0.401	0.766	1.38835e-18	17.8575
Selplg	1.74503e-21	1.58081	0.667	0.341	2.81962e-17	16.5498
Ndfip1	7.93153e-21	-1.14152	0.747	0.93	1.28158e-16	15.8923
Bcl2a1b	1.41889e-20	-1.88877	0.383	0.73	2.29264e-16	15.6397
Rps24	4.92377e-20	0.373595	1	1	7.95583e-16	15.0993
Sostdc1	7.49572e-20	-8.09459	0.006	0.349	1.21116e-15	14.9168
Ptms	1.48567e-19	-1.68216	0.432	0.718	2.40055e-15	14.6197
Cd3e	2.37599e-19	-0.814716	0.914	0.983	3.83913e-15	14.4158
Hspa5	2.82246e-19	-1.22888	0.71	0.901	4.56053e-15	14.341
Slfn2	3.64376e-19	-1.14972	0.759	0.915	5.88759e-15	14.2301
Rilpl2	3.72907e-19	-2.0558	0.265	0.654	6.02543e-15	14.22
Rpl37a	3.92955e-19	0.360787	1	0.994	6.34936e-15	14.1973
Egr1	5.09085e-19	-3.38843	0.142	0.428	8.22579e-15	14.0848
Tox	5.20291e-19	-1.58025	0.426	0.763	8.40687e-15	14.0754
Rgs1	1.93543e-18	1.98066	0.617	0.262	3.12727e-14	13.5048
Resf1	3.46523e-18	1.20923	0.741	0.541	5.59912e-14	13.2519
Ctsb	4.63161e-18	-1.50899	0.457	0.744	7.48376e-14	13.1259
Rps16	4.80984e-18	0.350871	1	0.994	7.77174e-14	13.1095
Rps19	4.89032e-18	0.428213	1	0.992	7.90178e-14	13.1023
Rpl18a	4.91785e-18	0.439314	1	0.992	7.94626e-14	13.0998
Rpl38	1.07243e-17	0.380275	1	0.997	1.73283e-13	12.7612
Ikzf4	2.25185e-17	1.78917	0.667	0.197	3.63854e-13	12.4391
AU020206	2.79258e-17	-1.44217	0.463	0.769	4.51224e-13	12.3456
Sdf4	6.34456e-17	-1.4213	0.71	0.828	1.02515e-12	11.9892
Ptpn1	9.16948e-17	-1.32516	0.568	0.792	1.4816e-12	11.8293
Pfn1	1.38496e-16	-0.787827	0.944	0.989	2.23782e-12	11.6502
Cd247	1.91808e-16	-1.45127	0.469	0.758	3.09924e-12	11.5087
Bcl2a1d	9.18143e-16	-2.3061	0.191	0.544	1.48353e-11	10.8287
Baz1a	1.04206e-15	-1.73896	0.37	0.67	1.68376e-11	10.7737
Rnf19a	1.1359e-15	-2.17149	0.179	0.563	1.83538e-11	10.7363
Ahnak	1.22607e-15	-1.4673	0.481	0.758	1.98108e-11	10.7031
Tnfrsf4	1.48711e-15	-1.32862	0.623	0.817	2.40287e-11	10.6193
Rpl17	1.94188e-15	0.322624	1	0.997	3.13769e-11	10.5034
Cd3g	2.85905e-15	-0.722658	0.944	0.977	4.61965e-11	10.3354
2410006H16Rik	4.73211e-15	1.18158	0.741	0.468	7.64615e-11	10.1166
Cd44	6.3567e-15	-1.62933	0.34	0.673	1.02712e-10	9.98838
Smco4	1.47156e-14	-2.06695	0.185	0.544	2.37775e-10	9.62383
Rps4x	1.6935e-14	0.384862	0.994	0.98	2.73636e-10	9.56283
Hsp90aa1	2.42626e-14	-1.19719	0.648	0.82	3.92035e-10	9.40667
Hdac7	2.51632e-14	-1.64892	0.34	0.623	4.06586e-10	9.39085
Aldoa	2.81114e-14	-1.11706	0.673	0.817	4.54224e-10	9.34273
Rpl37	3.04286e-14	0.375466	1	0.989	4.91666e-10	9.30833
Ptprc	4.12631e-14	-0.696123	0.975	0.994	6.66729e-10	9.17605
Lgals1	5.71541e-14	-1.81849	0.321	0.611	9.23497e-10	9.03456
Orai1	6.23702e-14	-1.75198	0.29	0.586	1.00778e-09	8.99664
Angptl2	6.45577e-14	-5.82237	0.012	0.406	1.04312e-09	8.98166
Rps7	8.86514e-14	0.348935	1	0.992	1.43243e-09	8.84393
Hivep3	9.45967e-14	-2.92444	0.136	0.434	1.52849e-09	8.81574
Rps9	1.23401e-13	0.332051	1	1	1.99392e-09	8.70029
Bhlhe40	2.22606e-13	-2.25882	0.148	0.507	3.59687e-09	8.44408
Lcp2	2.43483e-13	-1.09001	0.648	0.814	3.9342e-09	8.40514
Myl6	2.47951e-13	-0.725663	0.889	0.966	4.0064e-09	8.39725
Bcl11b	2.58441e-13	0.789954	0.87	0.71	4.1759e-09	8.37925
Trac	2.80124e-13	-0.81405	0.883	0.966	4.52624e-09	8.34426
Rpl39	2.9724e-13	0.404555	0.994	0.994	4.80281e-09	8.3185
Cox7a2l	3.16216e-13	0.804151	0.735	0.67	5.10941e-09	8.29163
Itgb1	3.1888e-13	-1.02354	0.642	0.876	5.15246e-09	8.28799
Rpl12	3.26811e-13	0.363299	0.994	0.98	5.28061e-09	8.27732
Fyn	3.34213e-13	-1.02972	0.667	0.811	5.40021e-09	8.26759
Rpl23	3.48757e-13	0.273049	1	1	5.63521e-09	8.24909
Ldha	5.59426e-13	-1.10982	0.617	0.806	9.0392e-09	8.04387
Rps10	5.6418e-13	0.317036	1	0.994	9.11602e-09	8.04019
B3gnt2	6.03366e-13	-1.26278	0.525	0.721	9.74919e-09	8.01103
Rps15a	8.26782e-13	0.366806	1	0.994	1.33592e-08	7.87422
Rps20	8.73182e-13	0.34234	1	0.997	1.41089e-08	7.85051
Cyfip1	1.35537e-12	-1.85686	0.259	0.527	2.19e-08	7.65956
St8sia4	1.75165e-12	1.39964	0.617	0.321	2.83031e-08	7.54817
Sub1	2.04338e-12	-0.953784	0.605	0.865	3.3017e-08	7.48126
Gimap5	2.18151e-12	-1.21316	0.512	0.738	3.52489e-08	7.45286
Rps11	2.41177e-12	0.372817	0.994	0.997	3.89693e-08	7.40928
Kdm6b	2.95588e-12	-1.92906	0.265	0.513	4.77611e-08	7.32093
Trim8	4.44224e-12	-1.64805	0.253	0.589	7.17776e-08	7.14401
Rgs10	4.49815e-12	1.08258	0.735	0.499	7.26811e-08	7.13858
Pdcd4	4.51971e-12	0.788523	0.79	0.676	7.30295e-08	7.1365
Rps13	5.19647e-12	0.278727	0.988	1	8.39646e-08	7.0759
St13	5.45646e-12	-1.26506	0.475	0.685	8.81656e-08	7.0547
Rps21	7.057e-12	0.285972	0.994	1	1.14027e-07	6.94299
Hsp90ab1	8.56806e-12	-0.769739	0.957	0.983	1.38443e-07	6.85873
Tut4	1.02941e-11	1.06683	0.642	0.414	1.66332e-07	6.77902
Rapgef6	1.13653e-11	0.740332	0.833	0.699	1.83641e-07	6.73603
Gbp7	1.34647e-11	1.2686	0.593	0.315	2.17563e-07	6.66241
Timp2	1.64462e-11	-1.90723	0.198	0.518	2.65738e-07	6.57555
Rpl32	1.8162e-11	0.396414	0.988	0.994	2.93461e-07	6.53245
Rpl36	2.0276e-11	0.329321	0.988	0.994	3.2762e-07	6.48463
Ybx3	2.03013e-11	-1.99658	0.204	0.513	3.28028e-07	6.48409
Rps23	2.37817e-11	0.215862	0.994	0.997	3.84265e-07	6.41537
Rap1a	2.83087e-11	-0.969559	0.599	0.789	4.57412e-07	6.33969
Rpl30	3.76676e-11	0.240963	0.994	0.997	6.08633e-07	6.21564
Lcp1	3.93214e-11	-0.885191	0.735	0.873	6.35355e-07	6.19698
Prdx1	4.18684e-11	-1.04101	0.593	0.763	6.7651e-07	6.16973
Slamf6	6.47734e-11	-1.07697	0.623	0.78	1.04661e-06	5.98022
Arf6	6.48599e-11	-1.5774	0.284	0.58	1.04801e-06	5.97964
Prkca	6.8791e-11	-1.22492	0.5	0.682	1.11152e-06	5.95408
Rpl27a	7.47444e-11	0.256878	0.988	0.994	1.20772e-06	5.91803
Hnrnpu	8.32999e-11	-0.846531	0.747	0.893	1.34596e-06	5.87097
Pgam1	8.56401e-11	-1.71145	0.241	0.521	1.38377e-06	5.85894
Rps14	8.85119e-11	0.246117	0.994	0.997	1.43018e-06	5.84461
Oaz1	9.27022e-11	-0.631055	0.907	0.941	1.49788e-06	5.82452
Rpl19	1.00126e-10	0.27102	0.994	1	1.61784e-06	5.79106
Atp1a1	1.28078e-10	-1.33212	0.364	0.628	2.06948e-06	5.68414
Dad1	1.2908e-10	-0.891909	0.698	0.865	2.08567e-06	5.68075
Ms4a6b	1.38852e-10	0.668057	0.901	0.803	2.24357e-06	5.64906
Rpl26	2.01597e-10	0.286548	1	0.994	3.25741e-06	5.48713
Ifngr1	2.70246e-10	2.02907	0.451	0.158	4.36663e-06	5.35985
Rpl13a	2.86624e-10	0.196619	0.994	0.997	4.63128e-06	5.3343
Rpl13	3.11693e-10	0.290553	0.994	1	5.03633e-06	5.29789
Dnaja1	3.50541e-10	-0.932006	0.636	0.803	5.66404e-06	5.24687
Sell	3.97851e-10	2.58639	0.389	0.141	6.42847e-06	5.19189
Sfpq	4.04209e-10	-0.932945	0.63	0.8	6.53121e-06	5.18501
Dusp2	4.07361e-10	-1.2388	0.407	0.676	6.58213e-06	5.18163
Rpl36a	4.63089e-10	0.37891	0.981	0.966	7.4826e-06	5.12595
Psme2	4.93991e-10	-1.03122	0.691	0.797	7.98191e-06	5.09789
Arpc2	6.0393e-10	-0.657574	0.821	0.93	9.75831e-06	5.01063
Rps3	6.291e-10	0.270944	0.994	0.997	1.0165e-05	4.99289
Ncl	7.04647e-10	-0.905237	0.84	0.915	1.13857e-05	4.94364
Gapdh	7.68448e-10	-0.757959	0.852	0.927	1.24166e-05	4.906
Eif4a1	7.97324e-10	-0.955638	0.531	0.786	1.28832e-05	4.88998
Gas5	8.44598e-10	0.577835	0.864	0.814	1.3647e-05	4.86496
Calr	8.55312e-10	-0.938864	0.593	0.789	1.38201e-05	4.85949
Jun	1.28698e-09	1.79771	0.438	0.177	2.07951e-05	4.68204
Tpm3	1.36222e-09	-0.683988	0.784	0.915	2.20107e-05	4.65737
Hmgb1	1.53855e-09	-0.655598	0.87	0.944	2.48599e-05	4.6045
Btla	1.57428e-09	-2.2345	0.154	0.423	2.54373e-05	4.59453
Txn1	1.80535e-09	-0.971494	0.525	0.735	2.91709e-05	4.53505
Pomp	1.8361e-09	-1.00612	0.512	0.699	2.96676e-05	4.52772
Ddx21	1.89301e-09	-1.22573	0.426	0.645	3.05872e-05	4.51446
Hook3	2.6069e-09	-1.43476	0.346	0.566	4.21223e-05	4.37549
Rps27	2.66172e-09	0.208084	1	0.997	4.30081e-05	4.36645
Hspa8	2.97263e-09	-0.657787	0.889	0.952	4.80318e-05	4.31847
H3f3b	2.98528e-09	-0.63761	0.932	0.969	4.82362e-05	4.31663
Kbtbd11	3.31619e-09	1.10161	0.562	0.33	5.3583e-05	4.27097
Rps5	3.48023e-09	0.29815	1	0.989	5.62335e-05	4.25001
2023-09-07	5.66084e-09	-0.81112	0.642	0.837	9.14679e-05	4.03873
Vsir	9.529e-09	-1.27676	0.37	0.589	0.00015397	3.81256
Il21	9.69101e-09	-7.13496	0	0.33	0.000156587	3.80524
Hnrnpab	9.72536e-09	-1.21541	0.426	0.642	0.000157142	3.80371
Egr3	1.05531e-08	-3.82237	0.043	0.301	0.000170516	3.76823
Rps18	1.11394e-08	0.300597	1	0.994	0.00017999	3.74475
Rpl27	1.12165e-08	0.252898	0.981	0.972	0.000181237	3.74175
Pkm	1.24597e-08	-0.814794	0.654	0.808	0.000201324	3.6961
Gnb1	1.56106e-08	-1.09267	0.407	0.645	0.000252236	3.59819
Egr2	1.85514e-08	-3.07146	0.062	0.341	0.000299753	3.52324
S100a10	1.90947e-08	-0.753556	0.796	0.913	0.000308532	3.5107
Rps15	2.01331e-08	0.237977	0.988	0.986	0.000325311	3.4877
Mbnl1	2.29259e-08	0.337114	0.981	0.98	0.000370437	3.43129
Actb	2.43755e-08	-0.421055	1	1	0.000393859	3.40466
Rpl22	2.62563e-08	0.254638	0.994	0.989	0.000424249	3.37238
Jak2	2.64874e-08	-1.27343	0.29	0.572	0.000427984	3.36857
Pdcd1	2.91329e-08	-2.05864	0.16	0.42	0.000470729	3.32723
Tle3	3.04497e-08	-1.32374	0.315	0.544	0.000492006	3.30803
Tiam1	3.39221e-08	-0.949563	0.5	0.721	0.000548113	3.26113
Itgal	3.59131e-08	-0.795789	0.617	0.814	0.000580284	3.23636
Kras	3.82026e-08	-1.30618	0.315	0.558	0.000617277	3.20952
Rps26	3.91213e-08	0.289297	1	0.989	0.000632121	3.1992
Calm1	3.92845e-08	-0.66525	0.84	0.93	0.000634759	3.19739
Rtn3	3.99114e-08	-1.25645	0.296	0.549	0.000644889	3.19052
Prkar1a	4.21323e-08	-0.882069	0.531	0.749	0.000680773	3.167
Hnrnpa2b1	4.54536e-08	-0.60333	0.901	0.977	0.000734439	3.13404
Cxcl10	4.8988e-08	-2.82614	0.105	0.285	0.000791548	3.10152
Zfp91	4.9661e-08	-1.02121	0.37	0.676	0.000802423	3.0956
Fxyd5	5.46617e-08	-0.663404	0.87	0.944	0.000883224	3.05393
Pik3r1	5.56238e-08	1.17763	0.506	0.256	0.000898769	3.04635
Ybx1	5.73091e-08	-0.703626	0.796	0.904	0.000926001	3.03339
Rel	5.91194e-08	-1.36793	0.309	0.518	0.000955252	3.01988
Cd9	6.15552e-08	-1.51434	0.241	0.47	0.00099461	3.00235
Ctss	7.10747e-08	0.571247	0.772	0.679	0.00114843	2.9399
Eef1a1	7.23689e-08	0.240592	1	0.997	0.00116934	2.93206
Smarca5	7.28015e-08	-0.844922	0.562	0.746	0.00117633	2.92947
Ostc	7.47048e-08	-1.13566	0.346	0.58	0.00120708	2.91826
Casp3	7.64359e-08	-1.76801	0.179	0.437	0.00123505	2.90831
Arhgap15	7.6443e-08	0.669566	0.722	0.608	0.00123517	2.90827
Dleu2	7.68141e-08	-1.41121	0.228	0.504	0.00124116	2.90617
Cfl1	8.99773e-08	-0.58605	0.883	0.921	0.00145385	2.83748
Ranbp1	9.52053e-08	-1.31949	0.364	0.558	0.00153833	2.81295
Rps28	1.01566e-07	0.22727	0.988	0.989	0.0016411	2.78487
Ighm	1.15779e-07	0.628696	0.907	0.823	0.00187076	2.72798
Grap2	1.18506e-07	1.7485	0.401	0.177	0.00191481	2.71787
Fau	1.3576e-07	0.217379	1	0.997	0.00219361	2.65884
Ier2	1.4246e-07	-1.18709	0.34	0.58	0.00230188	2.63792
Rplp2	1.513e-07	0.174074	1	0.994	0.0024447	2.61177
Tuba1b	1.51961e-07	-1.19696	0.475	0.6	0.00245538	2.60988
Vmp1	1.57263e-07	-0.973611	0.494	0.679	0.00254106	2.59499
Arap2	1.60244e-07	-1.01429	0.438	0.645	0.00258923	2.58683
Samhd1	1.60597e-07	0.631546	0.79	0.715	0.00259492	2.58588
Hspd1	1.84366e-07	-1.45634	0.327	0.527	0.00297898	2.52593
Cycs	1.84763e-07	-1.44452	0.302	0.493	0.00298541	2.525
Cd28	1.89411e-07	-0.853758	0.562	0.738	0.0030605	2.51421
Ssb	1.91378e-07	-0.842335	0.611	0.741	0.00309229	2.50972
Psma4	2.0991e-07	-1.00395	0.444	0.603	0.00339173	2.46958
Znrf1	2.26202e-07	0.956458	0.531	0.324	0.00365497	2.43712
Ube2n	2.55256e-07	-1.37387	0.247	0.501	0.00412442	2.38464
Gm2682	2.57975e-07	1.19141	0.463	0.304	0.00416836	2.38003
Apbb1ip	2.75341e-07	0.675565	0.642	0.504	0.00444896	2.35174
Hnrnpa3	2.84222e-07	-0.592799	0.846	0.949	0.00459246	2.33795
Eif3a	2.99483e-07	-0.744168	0.642	0.842	0.00483904	2.31524
Batf	3.33472e-07	-1.35892	0.333	0.515	0.00538825	2.26855
Zfp36l1	3.65848e-07	-0.739493	0.778	0.87	0.00591137	2.22831
Ubl5	3.96885e-07	-0.721	0.667	0.755	0.00641287	2.19295
Bzw1	4.60333e-07	-0.873469	0.519	0.707	0.00743806	2.12854
Stat1	4.76025e-07	0.53177	0.914	0.82	0.00769161	2.11398
Mxd4	4.76924e-07	0.922133	0.611	0.501	0.00770613	2.11316
Ubap2l	4.98214e-07	-0.885384	0.469	0.662	0.00805014	2.0942
Ran	5.29104e-07	-0.996759	0.537	0.679	0.00854926	2.06807
Rpl24	5.46404e-07	0.26748	0.988	0.983	0.0088288	2.0541
Arhgdia	5.59688e-07	-0.868175	0.519	0.696	0.00904343	2.04367
Ubash3a	5.85397e-07	0.753314	0.642	0.476	0.00945885	2.02416
Fkbp1a	5.99422e-07	-0.910486	0.457	0.679	0.00968546	2.01388
Stx6	6.22716e-07	-1.1355	0.309	0.544	0.0100619	1.99732
Raf1	6.49526e-07	-1.29444	0.278	0.501	0.010495	1.97902
Eif1	7.08131e-07	-0.43693	0.957	0.992	0.011442	1.9415
Cd2	7.46911e-07	-0.619988	0.809	0.882	0.0120686	1.91834
Rpl18	7.63672e-07	0.207435	0.994	0.992	0.0123394	1.90871
Ptpn7	8.0678e-07	-0.914868	0.432	0.651	0.013036	1.88486
Atp5g3	8.3874e-07	-0.814282	0.531	0.699	0.0135524	1.86798
Zfand5	8.75087e-07	-1.34622	0.278	0.468	0.0141397	1.84956
Psma3	9.95932e-07	-0.741923	0.58	0.775	0.0160923	1.79338
Psma7	1.01418e-06	-0.791237	0.636	0.766	0.0163871	1.7855
Cdkn1b	1.07962e-06	0.681467	0.71	0.493	0.0174445	1.75834
Arpc1b	1.1745e-06	-0.629146	0.71	0.839	0.0189776	1.72176
Tma7	1.19892e-06	-0.635035	0.759	0.876	0.0193722	1.71282
Slc9a3r1	1.23794e-06	0.797406	0.599	0.355	0.0200027	1.69891
Rplp1	1.34384e-06	0.168735	0.988	0.994	0.0217138	1.66326
Stk17b	1.43235e-06	-0.67553	0.648	0.839	0.0231438	1.63556
Rps3a1	1.47241e-06	0.139022	1	1	0.0237912	1.62358
Uba52	1.48163e-06	0.332163	0.951	0.932	0.0239401	1.62087
Nop58	1.51802e-06	-1.50888	0.253	0.454	0.0245281	1.61034
Gnaq	1.57497e-06	-1.89894	0.148	0.394	0.0254484	1.59434
Cd3d	1.58192e-06	-0.435522	0.938	0.986	0.0255607	1.59243
Il2ra	1.66141e-06	1.26458	0.506	0.169	0.0268451	1.57114
Zfas1	1.76785e-06	0.947401	0.475	0.318	0.0285649	1.54417
Cd83	1.82146e-06	-1.80308	0.185	0.377	0.0294311	1.53119
Chd1	1.95124e-06	-1.06748	0.315	0.561	0.0315281	1.5013
Smad7	1.96013e-06	0.824847	0.549	0.431	0.0316719	1.49933
Nfkbia	1.96343e-06	-0.915252	0.765	0.789	0.0317251	1.4986
Ptpn6	1.97601e-06	-1.09598	0.321	0.563	0.0319284	1.49582
Uqcrq	2.13766e-06	-0.817387	0.519	0.679	0.0345403	1.46167
Zfpm1	2.24477e-06	-1.37241	0.185	0.476	0.036271	1.44044
Ucp2	2.29239e-06	-0.594654	0.685	0.868	0.0370404	1.43132
Hnrnpll	2.38878e-06	-1.18159	0.259	0.513	0.0385979	1.41344
Gspt1	2.4136e-06	-1.14767	0.352	0.535	0.038999	1.40895
Tgfb1	2.43779e-06	-0.905328	0.469	0.637	0.0393897	1.40462
Fam169b	2.46777e-06	0.825935	0.58	0.428	0.0398743	1.39931
Mif	2.56012e-06	-0.972381	0.66	0.713	0.0413664	1.38335
Tpi1	2.64166e-06	-1.38062	0.265	0.431	0.0426839	1.36974
Tmbim6	2.94857e-06	-0.666178	0.636	0.825	0.047643	1.322
Cyth4	3.01816e-06	0.710124	0.574	0.408	0.0487675	1.31187
Pgk1	3.06958e-06	-0.981686	0.414	0.575	0.0495983	1.30453
